# Supplementary material for: The multicomparative 2-n-way genome suite
Source: HighWire-hosted journal article supplement (doi:10.1101/gr.262261.120), 2020-07-29
Supplement: SupplementalDataS1.docx [file SupplementalDataS1.docx]

**Alignments for Example 3**

**Abundant intron loss in mammals and birds**

**IL1**

>Homo_sapiens

GGAAAGAACCATTTCCTACCATTTACGTAGATTCACAAAAAGAAAATGAG------------------------------

--------------------------------------------------------------------------------

--------------AGGTGGAATGTTATTTCTAAATCACAGTTGAAGAACATTAAAAAGATGTG

>Pan_troglodytes

GGAAAGAACCATTTCCTACCATTTACGTGGATTCACAAAAAGAAAATGAG------------------------------

--------------------------------------------------------------------------------

--------------AGGTGGAATGTTATTTCTAAATCACAGTTGAAGAACATTAAAAAGATGTG

>Gorilla_gorilla

GGAAAGAACCATTTCCTACCATTTACGTAGATTCACAAAAAGAAAATGAG------------------------------

--------------------------------------------------------------------------------

--------------AGGTGGAATGTTATTTCTAAATCACAGTTGAAGAACATTAAAAAGATGTG

>Pongo_abelii

GAAAAGAACCATTTCCTACCATTTATGTAGATTCACAAAAAGAAAATGAG------------------------------

--------------------------------------------------------------------------------

--------------AGGTGGAATGTTATTTCTAAATCACAGTTGAAGAACATTAAAAAGATGTG

>Nomascus_leucogenys

GAAAAGAACCATTTCCTATCATTTACGTAGATTCACAAAAAGAAAATGAG------------------------------

--------------------------------------------------------------------------------

--------------AGGTGGAATGTTATTTCTAAATCACAGTTGAAGAACATTAAAAAGATGTG

>Macaca_mulatta

GAAAAGAACCATTTCCTACCATTTACATAGATTCACAAAAAGAAAATGAG------------------------------

--------------------------------------------------------------------------------

--------------AGGTGGAATGTTATTTCTAAATCACAGTTGAAGAACATTAAAAAGATGTG

>Callithrix_jacchus

GAAAAGAACCATTTCCTACCATTTACGTGGATTCACAAAAAGAAAATGAG-GT-----AGAGTAAACCAAAAACTTT-AT

GGAATT-----ATATTTTGGGAA---TAAATTTTCATCATGATACAAAGGTTTTGATAA-----TAAATATCTGT-TTAT

TTTCGT-----AG-AGGTGGAATGTTATTTCTAAATCACAGATGAAGAACATTAAAAAGATGTG

>Cebus_capucinus_imitator

GAAAAGAACCATTTCCTACCATTTACGTAGATTCACAAAAAGAAAATGAG-GT-----AGAGTAAACCAAAAACTTT-AT

GGAATT-----ATATTTTTGAAA---TAAATTTTCATCATGACACAAAGGTCTTGATAA-----TAAATACCTGT-TTAT

TTCTCT-----AG-CGGTGGGATGTTATTTCTAAATCACAGATGAAGAACATTAAAAAGATGTG

>Tarsius_syrichta

GAAAAGAACCGTTTCCTACCATTTACGTAGATTCACAAAAAGAAAATGAG-GT-----AGGGTGAACCACAAACTTT-GC

AGAATT-----ATGTTTGGTGAA---TAAATTTTCATCAGGACATAGCGGTCTTGAAAAA--ATTAATTACGGGC-TTCT

CTCTCC-----AG-AGGTGGGATGTTATTTCTAAATCACAGATGAAGAACATCAGAAAAATGTG

>Otolemur_garnettii

GAAAAGAACCATTTCCCACTATTTATGTAGATTCACAAAAAGAAAATGAG-GT-----AGGGTGAACTAAAAGCTTT-AC

AGAATT-----ATATCTTGTGA----TAAATTTTTATGAAA--ATAGAGTTCTTAAAAAA--ATTAA----CTGT-TTAT

CTCTTT-----AG-AGGTGGGATGTTATTTCTAAAACACAGATGAAGAACATTAAAAAAATGTG

>Eulemur_macaco

GAAAAGAACCATTTCCTACTATTTACGTAGATTCACAAAAGGAAAATGAG-GT-----AGGGTGAACCAAAAACTTT-AC

AGAATT-----ATATTTTGTGAA---TAAATTTTCAT--------AGAGGTCTTGAAAAA--ATTAAATATCTGT-TTAT

CTCTTT-----AG-AGGTGGGATGTTATTTCTAAATCACAGATGAAAAATATTAAAAAAATGTG

>Galeopterus_variegatus

GAAAAGAACCATTTCCTATCATTTACGTAGATTCACAAAAAGAAAATGAG-GT-----AGGGTAAGCCCAAAACTTT-AC

AGAATT-----ATATTTTGTGAA---TAAATTTGCATCAGGTCATAGAGGTCTTGAAAAA---TTAAATATCTGT-TTAT

CTCTCT-----AG-AGGTGGGATGTTATTTCTAAATCACAGATGAAAAACATTAAAAAAATGTG

>Tupaia_chinensis

GAAAAGAACCATTTCCTACCATTTATGTAGATTCACAAAAAGAGAATGAG-GT-----AGGGTAAACCAAAAAATT--AC

AGATTTTTTTCATTTTTTGTGAC---TATATTTTTGTCAGAACTTAGAGGCCTTGAAAAAAAATTAAAGACCTGT-CTCT

CTTTCT-----AG-AGGTGGGATGTTATTTCTAAATCACAGATGAAGAACATTAAAAAAATGTG

>Mus_musculus

GAAAAGAGCCATTTCCCACCATTTATGTGGACTCACAAAAGGAAAATGAG-GT-----AGGGTGCACCAGAACCTTC-TC

GAGATT-----GTGTTTTGTGAAAAATAACGTTTTCTGAGCACATAGAGGTATTGAAGATAACACAGATCTTTGTGCTCT

CTCTGT-----AG-AGATGGGATGTTATTTCTAAGTCACAGATGAAGAACATTAAAAAGATGTG

>Ochotona_princeps

GGAAGGAACCGTTTCCTACCATTTATGTGGATTCACAAAAGGAAAATGAG-GT-----AGGGTGAACCAGAAATTTTTAC

TGAGTT-----TTATTTTGTTGG---CAAATTTTCATCAAA--TCAGAAATCTTGAAAAA-------ATGTCTCT-GTTT

CTCTCT-----AG-AGGTGGGATGTTATTTCTAAATCACAGATGAAGAACATTAGAAAAATGTG

>Bos_taurus

GAAAAGAACCCTTTCCTACCATTTACGTAGATTCACAAAAAGAAAATGAG-GT-----AAGGTAAACCCAGAACTTT-AT

AGGATT-----TGATTTTGTGAA---GAAATTTTCATTAGAATACAGAGGTCTGGAAAAC--ACTAAATGTCTAT-TTAT

CTCTCC-----AG-AGGTGGGATGTTATTTCTAAGTCCCAGATGAAGAACATTAGGAAGCTGTG

>Canis_familiaris

GAAAAGAACCGTTTCCCACCATTTACATAGATTCCCAGAAAGAAAATGAG-GT-----AGGATGAGTCAAAAACTCT-AC

AGAATT-----ATATTTTGTAAA---TAAATTTTCATCAGAACATAGT-TTCTTGAAAAA-AATTAAACACCTGT-TTTT

TTCTCT-----AG-AGGTGGGATGTTATTTCTAAATCACAGATGAAGAACATAAAAAAAATGTG

>Myotis_lucifugus

GAAAAGAACCATTTCCTACCATTTACGTAGATTCACAAAAAGAAAATGAG-GT-----AGGGTGAACGAAAACCTTT-GC

AGAATT-----TTATTTTCTGAG---TA----TTCATCAGA-ATTAGAGGTCTTGAAAAA---CTAAATATCTAT-TCTT

CTCTCT-----AG-CGGTGGGATGTTATTTCTAAATCACAGATGAAGAACATTAGGAAAATGTG

>Loxodonta_africana

GAAAAGAACCATTTCCTACCATTTACGTCGATTCACAAAAAGAAAATGAG-GT-----AAGGTAAACTGAAATTTTC--T

AGAATT-----ATATTTGGTGAA---TATATTTTCATTAGAACACAGAAGTCTTGGAAAA-AAATAAATAT-TGT-TTAT

CTCTCT-----AG-AGGTGGGATGTTATTTCTAAATCACAGATGAAGAACATTAGAAAAATGTG

**IL2**

>Homo_sapiens

ATATTGCCAACCGCAGCCGGGCTGAGGCTGAGAGCATGTACCAGATCAAG------------------------------

--------------------------------------------------------------------------------

--------------------------------------------------------------------------------

--------------------------------------------------------------------------------

--------------------------------------------------------------------------------

--------------------------------------------------------------------------------

--------------------------------------------------------------------------------

--------------------------------------------------------------------------------

--------------------------------------------------------------------------------

-------------------TATGA-GGAGCTGCAGAGCCTGGCTGGGAAGCACGGGGATGACCTGCGGCG

>Pan_troglodytes

ATATTGCCAACCGCAGCCGGGCTGAGGCTGAGAGCATGTACCAGATCAAG------------------------------

--------------------------------------------------------------------------------

--------------------------------------------------------------------------------

--------------------------------------------------------------------------------

--------------------------------------------------------------------------------

--------------------------------------------------------------------------------

--------------------------------------------------------------------------------

--------------------------------------------------------------------------------

--------------------------------------------------------------------------------

-------------------TATGA-GGAGCTGCAGAGCCTGGCTGGGAAGCACGGGGATGACCTGCGGCG

>Gorilla_gorilla

ATATTGCCAACCGCAGCCGGGCTGAGGCTGAGAGCATGTACCAGATCAAG------------------------------

--------------------------------------------------------------------------------

--------------------------------------------------------------------------------

--------------------------------------------------------------------------------

--------------------------------------------------------------------------------

--------------------------------------------------------------------------------

--------------------------------------------------------------------------------

--------------------------------------------------------------------------------

--------------------------------------------------------------------------------

-------------------TATGA-GGAGCTGCAGAGCCTGGCTGGGAAGCATGGGGATGACCTGCGGCG

>Pongo_abelii

ATATTGCCAACCGCAGCCGGGCTGAGGCTGAGAGCATGTACCAGATCAAG------------------------------

--------------------------------------------------------------------------------

--------------------------------------------------------------------------------

--------------------------------------------------------------------------------

--------------------------------------------------------------------------------

--------------------------------------------------------------------------------

--------------------------------------------------------------------------------

--------------------------------------------------------------------------------

--------------------------------------------------------------------------------

-------------------TATGA-GGAGCTGCAGAGCCTGGCTGGGAAGCATGGGGATGACCTGCGGCG

>Nomascus_leucogenys

ATATTGCCAACCGCAGCCGGGCTGAGGCTGAGAGCATGTACCAGATCAAG------------------------------

--------------------------------------------------------------------------------

--------------------------------------------------------------------------------

--------------------------------------------------------------------------------

--------------------------------------------------------------------------------

--------------------------------------------------------------------------------

--------------------------------------------------------------------------------

--------------------------------------------------------------------------------

--------------------------------------------------------------------------------

-------------------TATGA-GGAGCTGCAGAGCCTGGCTGGGAAGCACGGGGATGACCTGCGGCG

>Macaca_mulatta

AGATCGCCAACCGCAGCCGGGCTGAGGCTGAGAGCATGTACCAGATCAAG------------------------------

--------------------------------------------------------------------------------

--------------------------------------------------------------------------------

--------------------------------------------------------------------------------

--------------------------------------------------------------------------------

--------------------------------------------------------------------------------

--------------------------------------------------------------------------------

--------------------------------------------------------------------------------

--------------------------------------------------------------------------------

-------------------TATGA-GGAGCTGCAGAGCCTGGCTGGGAAGCACGGGGATGACCTGCGGCG

>Callithrix_jacchus

AGATCGCCAACCGCAGCCGGGCTGAGGCGGAGAGCATATACCAGATCAAG------------------------------

--------------------------------------------------------------------------------

--------------------------------------------------------------------------------

--------------------------------------------------------------------------------

--------------------------------------------------------------------------------

--------------------------------------------------------------------------------

--------------------------------------------------------------------------------

--------------------------------------------------------------------------------

--------------------------------------------------------------------------------

-------------------TATGA-GGAGTTGCAGATGCTGGCTGGGAAGCACGGGGATGACCTGCGGCG

>Tarsius_syrichta

AGATCGCCAACCGCAGCCGGGCCGAGGCCGAGAGCATGTACCAGACCAAG-GT-----GAAGAGCA------GGGTCA--

-----CTAGG-TCGCCCTCCCCT--TCTGGACAG-TCTGTGCCCTAGTCCA----TGAGGAGGCAGCAGGGTGGCAAAGG

CCCCT----CTGCCCGCAGTG-AGCCGGGCCTGC--GGAGTGA-------------------------GGGTCTGGA-GG

TCTGGAAGGTGCCCTTCAGGGGTGTGCATGCATGTGTGC-----------------------------------------

--------------------------------------------------------------------------------

--------------------------------------------------------------------------------

----------------------------------------------------------GTGTGTGCACG-GTGCATGCAT

GTGT----GCGTGGTG---------------------------TAGGGGATGGGGCTCCGATGACCTGTGCTCTGCTGGC

CTGGGAGATGGGGCACTCTGCTGCGGGTGGAGAGCGTCTTGGGGGGCGGGGGTCC-CCTC-TGAATCCTCACTCCCTGTC

TGG-CCCCTGC-----AG-TACGA-GGAGCTGCAGACGCTGGCCGGGAAGCACGGGGATGACTTGCGTCG

>Otolemur_garnettii

AGATCGCCAACCGCAGCCGGGCTGAGGCTGAGAGTGTGTACCTGACCAAG-GT-----GAGGAGCA------GGGTCA--

-----CTAGG-CAATCCTGCCCT--TCTGGCAAGTTCTGTGCCCTAGACCA----TGAGGAGGCAGCAGGATTTC-AATT

GCAC--------CCTGCTGCC-AGGTGGGCCCTCAGAGAGTGG-------------------------GTGCTCTGA-GG

TCTGGAAGGCGACCTCTCTTGGCGTGTGTGT-------------------------------------------------

--------------------------------------------------------------------------------

--------------------------------------------------------------------------------

----------------------------------------------------------GTGTGTGTGTGTGTGTGTGTGT

GTGT----GTGTAGGG-----------------------------------------------------GCTCTGGTGAC

CTGGCAGAGAGGGAACTCTGCCTT------------------------GGGGTCC-C--C-TTGAGCCTCACCCCTTTTT

GCG-CATCTGC-----AG-TACGA-AGAGCTGCAGGTGCAGGCTGGGAAGCACGGGGACGACCTGCGGCG

>Eulemur_macaco

AGATCGCCAACCGCAGCCGGGCTGAGGCTGAGAGCATGTACCAGACCAAG-GT-----GAAGAGCA--------------

-----------CTGCTGTCCCC---TCTGTCCAGTTCTGTTCCCTAGTCTG----TGAGGAGGCAGCAGGATTC--AGTT

GCTCT----CTGCCCGCAGCC-AGCTGGGCCTGC--AGAGTG--------------------------GTGCCCAGA-TG

TCTGGAAGGCGGCCTTCAGTGGCGTGTGTGCGT-----------------------------------------------

--------------------------------------------------------------------------------

--------------------------------------------------------------------------------

----------------------------------------------------------GTGTGTGTGTGTGTGTGCACGC

TTGT----GTGTAGGG---------------------------------------------------GGATGGGGGTGAG

CCGGCAGAGAGGGCACCCTGCCTTGGGTGGAGATGCCTTCAGATACAGGC------CCCC-TCAAGACTCACTCTGCATC

TTG-GACCTGC-----AG-TACGA-GGAGCTGGAGGTTCTGGCTGGGAAACATGGGGATGACCTGCGTCG

>Galeopterus_variegatus

AGATTGCAAACCGCAGCCGGGCCGAGGCCGAGAGCATGTACCAGATCAAG-GT-----GAAGAGCA------GGGTCA--

-----CTAAGCCGATCCTCCCCT--TCTGCCTAGTTCTGTGTCCTAATCTA----TGAGGAGAGAGCAGAATTTCAAACT

CCACT----CAGCCTGCTGTG-AGCTGGGC---CACTGAGTGG-------------------------GTGTCCAAA-GG

TCTGGAAGGCAGCCTTCAGTGGTGTGTGTGTGTGTGTGTGTGTGTGTGTGGTGTGTGTGTGTGTGTGTGTGTGTGTGTGT

GGTGTGTGTGTGTGTGTGTGTGTGTGTGTGTGGTGTGTGTGTGTGTGTGTGTGTGTGTGTGTGGTGTGTGTGTGTGTGTG

TGTGTGTGTGTGTGGTGTGTGTGTGTGTGTGTGTGTGTGTGTGTGGTGTGTGTGTGTGTGTGTGTGTGTGTGTGTGGTGT

GTGTGTGTGTGTGTGTGTGTGTGTGTGGTGTGTGTGTGTGTGTGTGTGTGTGTGTGTGGTGTGTGTGTGTGTGTGTGTGT

GTGT----GTGTGGTGTGTGTGTGTGTGTGTGTGTGTGTGTGTTAGGCGGATGCAGGGAGATGGCCTGCGCTCTGGTGTC

CTGGCAGAGAAGGCACTCTCCCTTGGGTGGAGGGCACCTTGAGGTCCAGGGGTCC-CCTC-TCGAGCCTCACTGCTCATC

CTG-CA-CTGC-----AG-TACGA-GGAGCTGCAGAACCAGGCTAGGAAGCATGGGGATGACCTGCGTCG

>Tupaia_chinensis

AAATCGCCAACCGCAGCCGTGCTGAAGCTGAGAACATGTACCAAATCAAG-GT-----GATGAGCA------GGGTCG--

-----CTAGC-CGGTCCTCCCCT--TCTGGACAGTTCTGTGTCCT---CTA----TGAGGAGGGAGCAGGATTTCAAATT

CCA------CTGCCTACTGTG-AGCTGGGCCTGG--GGAGTGG-------------------------GTGCCTAA--GG

TCTGGGAGGTG-CTTTCAGTATTGTGTGTGTGTGTGTGT-----------------------------------------

--------------------------------------------------------------------------------

--------------------------------------------------------------------------------

----------------------------------------------------------GTGTGTGTGTGTGTTTGCATGC

ATGT----GTATATAG---------------------------AAGCATGGAAGGTTTAGATGACCCCGGCTCTGGTA--

CTGGCCAAGAGGGCACTT--CCTTTGGTGGGGGCACCTCCGGT--GCAGGGGTGC-CCTC-TCGAGCCATGCTGGTTT--

----CACCTGC-----AG-TATGA-GGAGCTGCAGACGCTGGCTGGGAAGCACGGGGATGACCTGCGGCG

>Mus_musculus

ACATTGCCAATCGCAGCCGAGCTGAGGCTGAAACCATGTACCAGATTAAG-GT-----AAAGAGCA---GGGGGGTCA--

-----CAAGCCTGGGTCTCCCTT--CCTGGCCCGTTCTGTGTCCTGGATCA---TTGAGGAGGGAGCAGAGAACCAAATC

CCACG----CTGCCTGCTGTG-GACTGGCTCCAC--ACAATGG-------------------------AGGCCTGGA-GG

TCTGGAAAGGGGCCTTCACTGGTGTGTGCATGTGAGT-------------------------------------------

--------------------------------------------------------------------------------

--------------------------------------------------------------------------------

----------------------------------------------------------GTGTGTGTGTCGGTGTGCACAC

GTGCAGGAGCTTGGTG----------------------------------------------------------GGTGAG

ATGTCAG----------------------------------------------------C-TGAACCCTCACCTCCCTTC

TTGCCCCCTGC-----AG-TATGA-GGAATTGCAGACCCTGGCTGGGAAGCACGGGGATGATCTGCGCCG

>Ochotona_princeps

AGATCGCCAACCGCAGCCGTGCCGAGGCCGAGAGCATGTACCAGGTCAAG-GT-----GAGGAAGAGAGTGGGGCTCA--

---------GCCGGCCCTGCC----TTTGGCCAG----------------------------------GGCTTCCATCGT

CCTCA----TCAGCTGTTGTGAAGAAGGACCTGC--AGAATG------------------------------------GC

AGTGGGAGGTCACCTACCGTGGGGTCGGGGG-------------------------------------------------

--------------------------------------------------------------------------------

--------------------------------------------------------------------------------

----------------------------------------------------------GAGTGTGTTGGAGTGGG-----

--------GAAGGGAG---------------------------------------------------------GGATGAC

TATGGGCAGCAAGCACCCTGCCTTGCGTC----------------CCTGGAGCATGCCCCGTAGTGTCTCACTTTCTCTC

CTG---CTTGC-----AG-TATGA-AGAGCTGCAGATGCAGGCTGGCAAGCACGGGGACGACTTGCGTCG

>Bos_taurus

AGATCGCCAACCGCAGCCGGGCTGAGGCCGAGGCCATGTACCAAATCAAG-GT-----AAAGAGCA------GGGGC---

-----TCAACCTGGTGCTCCCCT--TTTGGGTAGTTCCGGGTGCTAGTCCTTCCTTGAGGGAGAAGCGAGATTTCAAACT

---------CTGCCTGCTGGG-AGTGGGGCTGCCAAGTCGTG------------------------------CCGGG-GG

ACAGGGATGGGATGTTCCAGGCCCAGAG----------------------------------------------------

--------------------------------------------------------------------------------

--------------------------------------------------------------------------------

----------------------------------------------------------GTGTGGAGCCAGGTGGGC----

--------GTGAGATG-----------------------------------------------ACCTGGGCTCTGGTGAC

TTGGCTGA--GGGTACTCTTTCCTTGGAGGGA-------------CCAGGAGTCC-CGTC-TCAAA-CTCACTCCTCATT

TCA-CATCTGC-----AG-TATGA-GGAGCTGCAGACACTGGCTGGGAAGCACGGGGATGACCTTCGTCG

>Canis_familiaris

ACATCGCCAACCGCAGCCGGGTGGAGGCCGAGACCATGTACCAGATCAAG-GT-----CAAGAGCG------GGGGCA--

-----CTAG--CTGGCCTTCCCC--TTTGGCGGGTTCTGCTCCTTAGTGCA-------GGAGGGAGCAGGATTTCAGACT

CTATC----CTGCCTGCTGTG-AGCGGGGCCCGC--GGAGTGGGTGCTGGGGAGACCGCGGTATGG--GGACCTGGAGGG

TCTGGAAGAAGGCTGGTGGCG-----------------------------------------------------------

--------------------------------------------------------------------------------

--------------------------------------------------------------------------------

----------------------------------------------------------GTGTGTGTGCG-----------

--------GGGAGGGG-----------------------------------------------------GCAGAGGTGA-

--GGCGAGCTGGGCCCTC-----------------------------------------------GCCTCACTCC-CGCC

TCC-CACCCGC-----AG-TATGA-GGAGCTGCAGACGTTGGCCGGGAAGCACGGGGATGACCTCCGTCG

>Myotis_lucifugus

ACATCGCCAACCGCAGCCGGGCTGAGGCTGAGACCATGTACCAGATCAAG-GT-----GAAGAGCA------GGGTCA--

-----CTAAGCTGGCCTTCCCCT--TCTGGCCAGTTCTGTGCTCTAGTTCA----TGAGCGGGGTGCAGGATTTCAAACA

CCTCT----CTGCCTGCCATG-TGCTGGGACTGC--CGAGTGGGTGCTGGGGAGATTGGGATGCCCTTGTGCCCAGA-GG

TCTGGAAGAAAGCCTGCAGT------------------------------------------------------------

--------------------------------------------------------------------------------

--------------------------------------------------------------------------------

----------------------------------------------------------GTGTGCGAGTTGGT--------

--------------------------------------------------------------------------GGTG--

GTGGTGGTGGGGGCACAGGGCCTT----------------------------------------------ACTCTTCATG

TCA-CCCCCAC-----AG-TATGA-GGAGCTGCAGACGTTGGCTGGGAAGCACGGAGATGACCTGCGTCG

>Loxodonta_africana

AGATCGCCAACCGCAGCCGGGCTGAGGCTGAGAGCATGTATCAGATCAAG-GT-----GAAGAGCA------GAGTCATT

TGTTCCTAGGCTACCCCCTCCCTACTCTGGCCACATCTATGCCCTGGTCA-----CAGGGAGGGAGCAGGATTTCAAACT

TTGCTAAACCTGCCGGCTGGA-TGCTGGATTCCCT---------------------------------GTGCTTGAA-GA

CCTAGAAGGT---CTTTAGTG-----------------------------------------------------------

--------------------------------------------------------------------------------

--------------------------------------------------------------------------------

----------------------------------------------------------GGGTGTGTAGGGGG--------

--------GGGGGGTG-----------------------------------------------------GGCAAGGTGAC

CTGGCAGAGTGGGTACTTTCCTTTGGGTAGAAGGCATCTTGGGCTTCAGGGGGCCATCCC-TCAGGCCTCACTCCTTGTC

TCT-CA-CTGC-----AG-TATGAGGGAGCTGCAGACACTGGCTGGGAAGCACGGGGATGACCTTCGTCG

**IL3**

>Homo_sapiens

CCACCCCAGCGGTTTTGACTACAGACAGCGCCACTGGAGAGACTGTGGTG------------------------------

--------------------------------------------------------------------------------

--------------------------------------------------------------------------------

--------------------------------------------------------------------------------

--------------------------------------------------------------------------------

--------------------------------------------------------------------------------

--------------------------------------------------------------------------------

--------------------------------------------------------------------------------

--------------------------------------------------------------------------------

--------------------------------------------------------------------------------

--------------------------------------------------------------------------------

--------------------------------------------------------------------------------

--------------------------------------------------------------------------------

--------------------------------------------------------------------------------

--------------------------------------------------------------------------------

--------------------------------------------------------------------------------

--------------------------------------------------------------------------------

--------------------------------------------------------------------------------

--------------------------------------------------------------------------------

--------------------------------------------------------------------------------

--------------------------------------------------------------------------------

--------------------------------------------------------------------------------

--------------------------------------------------------------------------------

--------------------------------------------------------------------------------

--------------------------------------------------------------------------------

--------------------------------------------------------------------------------

--------------------------------------------------------------------------------

--------------------------------------------------------------------------------

--------------------------------------------------------------------------------

--------------------------------------------------------------------------------

--------------------------------------------------------------------------------

--------------------------------------------------------------------------------

--------------------------------------------------------------------------------

--------------------------------------------------------------------------------

--------------------------------------------------------------------------------

--------------------------------------------------------------------------------

--------------------------------------------------------------------------------

--------------------------------------------------------------------------------

--------------------------------------------------------------------------------

--------------------------------------------------------------------------------

--------------------------------------------------------------------------------

--------------------------------------------------------------------------------

--------------------------------------------------------------------------------

--------------------------------------------------------------------------------

--------------------------------------------------------------------------------

--------------------------------------------------------------------------------

--------------------------------------------------------------------------------

--------------------------------------------------------------------------------

--------------------------------------------------------------------------------

--------------------------------------------------------------------------------

--------------------------------------------------------------------------------

--------------------------------------------------------------------------------

--------------------------------------------------------------------------------

-----------------------------------------ACGACGGACCTGCTCACCCAAGCAATGACAGAACTGTCC

CAGACCTTAAC

>Pan_troglodytes

CCACCCCAGCGGTTTTGACTACAGACAGCGCCACTGGAGAGACTGTGGTG------------------------------

--------------------------------------------------------------------------------

--------------------------------------------------------------------------------

--------------------------------------------------------------------------------

--------------------------------------------------------------------------------

--------------------------------------------------------------------------------

--------------------------------------------------------------------------------

--------------------------------------------------------------------------------

--------------------------------------------------------------------------------

--------------------------------------------------------------------------------

--------------------------------------------------------------------------------

--------------------------------------------------------------------------------

--------------------------------------------------------------------------------

--------------------------------------------------------------------------------

--------------------------------------------------------------------------------

--------------------------------------------------------------------------------

--------------------------------------------------------------------------------

--------------------------------------------------------------------------------

--------------------------------------------------------------------------------

--------------------------------------------------------------------------------

--------------------------------------------------------------------------------

--------------------------------------------------------------------------------

--------------------------------------------------------------------------------

--------------------------------------------------------------------------------

--------------------------------------------------------------------------------

--------------------------------------------------------------------------------

--------------------------------------------------------------------------------

--------------------------------------------------------------------------------

--------------------------------------------------------------------------------

--------------------------------------------------------------------------------

--------------------------------------------------------------------------------

--------------------------------------------------------------------------------

--------------------------------------------------------------------------------

--------------------------------------------------------------------------------

--------------------------------------------------------------------------------

--------------------------------------------------------------------------------

--------------------------------------------------------------------------------

--------------------------------------------------------------------------------

--------------------------------------------------------------------------------

--------------------------------------------------------------------------------

--------------------------------------------------------------------------------

--------------------------------------------------------------------------------

--------------------------------------------------------------------------------

--------------------------------------------------------------------------------

--------------------------------------------------------------------------------

--------------------------------------------------------------------------------

--------------------------------------------------------------------------------

--------------------------------------------------------------------------------

--------------------------------------------------------------------------------

--------------------------------------------------------------------------------

--------------------------------------------------------------------------------

--------------------------------------------------------------------------------

--------------------------------------------------------------------------------

-----------------------------------------ACGACGGACCTGCTCACCCAAGCAATGACAGAACTGTCC

CAGACCTTAAC

>Gorilla_gorilla

CCACCCCAGCGGTTTTGACTACAGACAGTGCCACTGGAGAGACTGTGGTG------------------------------

--------------------------------------------------------------------------------

--------------------------------------------------------------------------------

--------------------------------------------------------------------------------

--------------------------------------------------------------------------------

--------------------------------------------------------------------------------

--------------------------------------------------------------------------------

--------------------------------------------------------------------------------

--------------------------------------------------------------------------------

--------------------------------------------------------------------------------

--------------------------------------------------------------------------------

--------------------------------------------------------------------------------

--------------------------------------------------------------------------------

--------------------------------------------------------------------------------

--------------------------------------------------------------------------------

--------------------------------------------------------------------------------

--------------------------------------------------------------------------------

--------------------------------------------------------------------------------

--------------------------------------------------------------------------------

--------------------------------------------------------------------------------

--------------------------------------------------------------------------------

--------------------------------------------------------------------------------

--------------------------------------------------------------------------------

--------------------------------------------------------------------------------

--------------------------------------------------------------------------------

--------------------------------------------------------------------------------

--------------------------------------------------------------------------------

--------------------------------------------------------------------------------

--------------------------------------------------------------------------------

--------------------------------------------------------------------------------

--------------------------------------------------------------------------------

--------------------------------------------------------------------------------

--------------------------------------------------------------------------------

--------------------------------------------------------------------------------

--------------------------------------------------------------------------------

--------------------------------------------------------------------------------

--------------------------------------------------------------------------------

--------------------------------------------------------------------------------

--------------------------------------------------------------------------------

--------------------------------------------------------------------------------

--------------------------------------------------------------------------------

--------------------------------------------------------------------------------

--------------------------------------------------------------------------------

--------------------------------------------------------------------------------

--------------------------------------------------------------------------------

--------------------------------------------------------------------------------

--------------------------------------------------------------------------------

--------------------------------------------------------------------------------

--------------------------------------------------------------------------------

--------------------------------------------------------------------------------

--------------------------------------------------------------------------------

--------------------------------------------------------------------------------

--------------------------------------------------------------------------------

-----------------------------------------ACGACGGACCTGCTCACCCAAGCAATGACAGAACTGTCC

CAGACCTTAAC

>Pongo_abelii

CCACCCCAGCGGTTTTGACTACGGACAGCGCCACTGGAGAGACTGTGGTG------------------------------

--------------------------------------------------------------------------------

--------------------------------------------------------------------------------

--------------------------------------------------------------------------------

--------------------------------------------------------------------------------

--------------------------------------------------------------------------------

--------------------------------------------------------------------------------

--------------------------------------------------------------------------------

--------------------------------------------------------------------------------

--------------------------------------------------------------------------------

--------------------------------------------------------------------------------

--------------------------------------------------------------------------------

--------------------------------------------------------------------------------

--------------------------------------------------------------------------------

--------------------------------------------------------------------------------

--------------------------------------------------------------------------------

--------------------------------------------------------------------------------

--------------------------------------------------------------------------------

--------------------------------------------------------------------------------

--------------------------------------------------------------------------------

--------------------------------------------------------------------------------

--------------------------------------------------------------------------------

--------------------------------------------------------------------------------

--------------------------------------------------------------------------------

--------------------------------------------------------------------------------

--------------------------------------------------------------------------------

--------------------------------------------------------------------------------

--------------------------------------------------------------------------------

--------------------------------------------------------------------------------

--------------------------------------------------------------------------------

--------------------------------------------------------------------------------

--------------------------------------------------------------------------------

--------------------------------------------------------------------------------

--------------------------------------------------------------------------------

--------------------------------------------------------------------------------

--------------------------------------------------------------------------------

--------------------------------------------------------------------------------

--------------------------------------------------------------------------------

--------------------------------------------------------------------------------

--------------------------------------------------------------------------------

--------------------------------------------------------------------------------

--------------------------------------------------------------------------------

--------------------------------------------------------------------------------

--------------------------------------------------------------------------------

--------------------------------------------------------------------------------

--------------------------------------------------------------------------------

--------------------------------------------------------------------------------

--------------------------------------------------------------------------------

--------------------------------------------------------------------------------

--------------------------------------------------------------------------------

--------------------------------------------------------------------------------

--------------------------------------------------------------------------------

--------------------------------------------------------------------------------

-----------------------------------------ACGACGGACCTGCTCACCCAAGCAATGACAGAACTGTCC

CAGACCTTAAC

>Nomascus_leucogenys

CCACCCCAGCAGTTTTGACTACGGACAGCGCCACTGGAGAGACTGTGGTG------------------------------

--------------------------------------------------------------------------------

--------------------------------------------------------------------------------

--------------------------------------------------------------------------------

--------------------------------------------------------------------------------

--------------------------------------------------------------------------------

--------------------------------------------------------------------------------

--------------------------------------------------------------------------------

--------------------------------------------------------------------------------

--------------------------------------------------------------------------------

--------------------------------------------------------------------------------

--------------------------------------------------------------------------------

--------------------------------------------------------------------------------

--------------------------------------------------------------------------------

--------------------------------------------------------------------------------

--------------------------------------------------------------------------------

--------------------------------------------------------------------------------

--------------------------------------------------------------------------------

--------------------------------------------------------------------------------

--------------------------------------------------------------------------------

--------------------------------------------------------------------------------

--------------------------------------------------------------------------------

--------------------------------------------------------------------------------

--------------------------------------------------------------------------------

--------------------------------------------------------------------------------

--------------------------------------------------------------------------------

--------------------------------------------------------------------------------

--------------------------------------------------------------------------------

--------------------------------------------------------------------------------

--------------------------------------------------------------------------------

--------------------------------------------------------------------------------

--------------------------------------------------------------------------------

--------------------------------------------------------------------------------

--------------------------------------------------------------------------------

--------------------------------------------------------------------------------

--------------------------------------------------------------------------------

--------------------------------------------------------------------------------

--------------------------------------------------------------------------------

--------------------------------------------------------------------------------

--------------------------------------------------------------------------------

--------------------------------------------------------------------------------

--------------------------------------------------------------------------------

--------------------------------------------------------------------------------

--------------------------------------------------------------------------------

--------------------------------------------------------------------------------

--------------------------------------------------------------------------------

--------------------------------------------------------------------------------

--------------------------------------------------------------------------------

--------------------------------------------------------------------------------

--------------------------------------------------------------------------------

--------------------------------------------------------------------------------

--------------------------------------------------------------------------------

--------------------------------------------------------------------------------

-----------------------------------------ACAACGGACCTGCTCACCCAAGCAATGACAGAACTGTCC

CAGACCTTAAC

>Macaca_mulatta

CCACCCCAGCGGTTTTAACTACAGACAGCGCCACCGGAGAGACTGTGGTG------------------------------

--------------------------------------------------------------------------------

--------------------------------------------------------------------------------

--------------------------------------------------------------------------------

--------------------------------------------------------------------------------

--------------------------------------------------------------------------------

--------------------------------------------------------------------------------

--------------------------------------------------------------------------------

--------------------------------------------------------------------------------

--------------------------------------------------------------------------------

--------------------------------------------------------------------------------

--------------------------------------------------------------------------------

--------------------------------------------------------------------------------

--------------------------------------------------------------------------------

--------------------------------------------------------------------------------

--------------------------------------------------------------------------------

--------------------------------------------------------------------------------

--------------------------------------------------------------------------------

--------------------------------------------------------------------------------

--------------------------------------------------------------------------------

--------------------------------------------------------------------------------

--------------------------------------------------------------------------------

--------------------------------------------------------------------------------

--------------------------------------------------------------------------------

--------------------------------------------------------------------------------

--------------------------------------------------------------------------------

--------------------------------------------------------------------------------

--------------------------------------------------------------------------------

--------------------------------------------------------------------------------

--------------------------------------------------------------------------------

--------------------------------------------------------------------------------

--------------------------------------------------------------------------------

--------------------------------------------------------------------------------

--------------------------------------------------------------------------------

--------------------------------------------------------------------------------

--------------------------------------------------------------------------------

--------------------------------------------------------------------------------

--------------------------------------------------------------------------------

--------------------------------------------------------------------------------

--------------------------------------------------------------------------------

--------------------------------------------------------------------------------

--------------------------------------------------------------------------------

--------------------------------------------------------------------------------

--------------------------------------------------------------------------------

--------------------------------------------------------------------------------

--------------------------------------------------------------------------------

--------------------------------------------------------------------------------

--------------------------------------------------------------------------------

--------------------------------------------------------------------------------

--------------------------------------------------------------------------------

--------------------------------------------------------------------------------

--------------------------------------------------------------------------------

--------------------------------------------------------------------------------

-----------------------------------------ACGACGGACCTGCTCACCCAAGCAATGACAGAACTGTCC

CAGACCTTGAC

>Callithrix_jacchus

CCACCCCAGCAGTTTTAACTACAGACAGCGCCACTGGAGAGACCGTGGTG------------------------------

--------------------------------------------------------------------------------

--------------------------------------------------------------------------------

--------------------------------------------------------------------------------

--------------------------------------------------------------------------------

--------------------------------------------------------------------------------

--------------------------------------------------------------------------------

--------------------------------------------------------------------------------

--------------------------------------------------------------------------------

--------------------------------------------------------------------------------

--------------------------------------------------------------------------------

--------------------------------------------------------------------------------

--------------------------------------------------------------------------------

--------------------------------------------------------------------------------

--------------------------------------------------------------------------------

--------------------------------------------------------------------------------

--------------------------------------------------------------------------------

--------------------------------------------------------------------------------

--------------------------------------------------------------------------------

--------------------------------------------------------------------------------

--------------------------------------------------------------------------------

--------------------------------------------------------------------------------

--------------------------------------------------------------------------------

--------------------------------------------------------------------------------

--------------------------------------------------------------------------------

--------------------------------------------------------------------------------

--------------------------------------------------------------------------------

--------------------------------------------------------------------------------

--------------------------------------------------------------------------------

--------------------------------------------------------------------------------

--------------------------------------------------------------------------------

--------------------------------------------------------------------------------

--------------------------------------------------------------------------------

--------------------------------------------------------------------------------

--------------------------------------------------------------------------------

--------------------------------------------------------------------------------

--------------------------------------------------------------------------------

--------------------------------------------------------------------------------

--------------------------------------------------------------------------------

--------------------------------------------------------------------------------

--------------------------------------------------------------------------------

--------------------------------------------------------------------------------

--------------------------------------------------------------------------------

--------------------------------------------------------------------------------

--------------------------------------------------------------------------------

--------------------------------------------------------------------------------

--------------------------------------------------------------------------------

--------------------------------------------------------------------------------

--------------------------------------------------------------------------------

--------------------------------------------------------------------------------

--------------------------------------------------------------------------------

--------------------------------------------------------------------------------

--------------------------------------------------------------------------------

-----------------------------------------ACGACGGACCTGCTCACCCAAGCAATGACAGAACTGTCC

CAGACCTTAAC

>Cebus_capucinus_imitator

CCACCCCAGCAGTTTTAACTACAGACAGCGCCACTGGAGAGACCGTGGTG------------------------------

--------------------------------------------------------------------------------

--------------------------------------------------------------------------------

--------------------------------------------------------------------------------

--------------------------------------------------------------------------------

--------------------------------------------------------------------------------

--------------------------------------------------------------------------------

--------------------------------------------------------------------------------

--------------------------------------------------------------------------------

--------------------------------------------------------------------------------

--------------------------------------------------------------------------------

--------------------------------------------------------------------------------

--------------------------------------------------------------------------------

--------------------------------------------------------------------------------

--------------------------------------------------------------------------------

--------------------------------------------------------------------------------

--------------------------------------------------------------------------------

--------------------------------------------------------------------------------

--------------------------------------------------------------------------------

--------------------------------------------------------------------------------

--------------------------------------------------------------------------------

--------------------------------------------------------------------------------

--------------------------------------------------------------------------------

--------------------------------------------------------------------------------

--------------------------------------------------------------------------------

--------------------------------------------------------------------------------

--------------------------------------------------------------------------------

--------------------------------------------------------------------------------

--------------------------------------------------------------------------------

--------------------------------------------------------------------------------

--------------------------------------------------------------------------------

--------------------------------------------------------------------------------

--------------------------------------------------------------------------------

--------------------------------------------------------------------------------

--------------------------------------------------------------------------------

--------------------------------------------------------------------------------

--------------------------------------------------------------------------------

--------------------------------------------------------------------------------

--------------------------------------------------------------------------------

--------------------------------------------------------------------------------

--------------------------------------------------------------------------------

--------------------------------------------------------------------------------

--------------------------------------------------------------------------------

--------------------------------------------------------------------------------

--------------------------------------------------------------------------------

--------------------------------------------------------------------------------

--------------------------------------------------------------------------------

--------------------------------------------------------------------------------

--------------------------------------------------------------------------------

--------------------------------------------------------------------------------

--------------------------------------------------------------------------------

--------------------------------------------------------------------------------

--------------------------------------------------------------------------------

-----------------------------------------ACGACGGACCTGCTCACCCAAGCAATGACAGAACTGTCC

CAGACCTTAAC

>Tarsius_syrichta

CTGCCCCAGCAGTTTTAACTACAGACAGTGCCACTGGAGAGACTGTGGTG------------------------------

--------------------------------------------------------------------------------

--------------------------------------------------------------------------------

--------------------------------------------------------------------------------

--------------------------------------------------------------------------------

--------------------------------------------------------------------------------

--------------------------------------------------------------------------------

--------------------------------------------------------------------------------

--------------------------------------------------------------------------------

--------------------------------------------------------------------------------

--------------------------------------------------------------------------------

--------------------------------------------------------------------------------

--------------------------------------------------------------------------------

--------------------------------------------------------------------------------

--------------------------------------------------------------------------------

--------------------------------------------------------------------------------

--------------------------------------------------------------------------------

--------------------------------------------------------------------------------

--------------------------------------------------------------------------------

--------------------------------------------------------------------------------

--------------------------------------------------------------------------------

--------------------------------------------------------------------------------

--------------------------------------------------------------------------------

--------------------------------------------------------------------------------

--------------------------------------------------------------------------------

--------------------------------------------------------------------------------

--------------------------------------------------------------------------------

--------------------------------------------------------------------------------

--------------------------------------------------------------------------------

--------------------------------------------------------------------------------

--------------------------------------------------------------------------------

--------------------------------------------------------------------------------

--------------------------------------------------------------------------------

--------------------------------------------------------------------------------

--------------------------------------------------------------------------------

--------------------------------------------------------------------------------

--------------------------------------------------------------------------------

--------------------------------------------------------------------------------

--------------------------------------------------------------------------------

--------------------------------------------------------------------------------

--------------------------------------------------------------------------------

--------------------------------------------------------------------------------

--------------------------------------------------------------------------------

--------------------------------------------------------------------------------

--------------------------------------------------------------------------------

--------------------------------------------------------------------------------

--------------------------------------------------------------------------------

--------------------------------------------------------------------------------

--------------------------------------------------------------------------------

--------------------------------------------------------------------------------

--------------------------------------------------------------------------------

--------------------------------------------------------------------------------

--------------------------------------------------------------------------------

-----------------------------------------ACAACAGACCTGCTCACCCAAGCAATGACAGAACTGTCC

CAGACCTTAAC

>Otolemur_garnettii

CTGCCCCAGCTGTTCTAACCACAGACAGTGCCACTGGAGAGACCGTGGTG------------------------------

--------------------------------------------------------------------------------

--------------------------------------------------------------------------------

--------------------------------------------------------------------------------

--------------------------------------------------------------------------------

--------------------------------------------------------------------------------

--------------------------------------------------------------------------------

--------------------------------------------------------------------------------

--------------------------------------------------------------------------------

--------------------------------------------------------------------------------

--------------------------------------------------------------------------------

--------------------------------------------------------------------------------

--------------------------------------------------------------------------------

--------------------------------------------------------------------------------

--------------------------------------------------------------------------------

--------------------------------------------------------------------------------

--------------------------------------------------------------------------------

--------------------------------------------------------------------------------

--------------------------------------------------------------------------------

--------------------------------------------------------------------------------

--------------------------------------------------------------------------------

--------------------------------------------------------------------------------

--------------------------------------------------------------------------------

--------------------------------------------------------------------------------

--------------------------------------------------------------------------------

--------------------------------------------------------------------------------

--------------------------------------------------------------------------------

--------------------------------------------------------------------------------

--------------------------------------------------------------------------------

--------------------------------------------------------------------------------

--------------------------------------------------------------------------------

--------------------------------------------------------------------------------

--------------------------------------------------------------------------------

--------------------------------------------------------------------------------

--------------------------------------------------------------------------------

--------------------------------------------------------------------------------

--------------------------------------------------------------------------------

--------------------------------------------------------------------------------

--------------------------------------------------------------------------------

--------------------------------------------------------------------------------

--------------------------------------------------------------------------------

--------------------------------------------------------------------------------

--------------------------------------------------------------------------------

--------------------------------------------------------------------------------

--------------------------------------------------------------------------------

--------------------------------------------------------------------------------

--------------------------------------------------------------------------------

--------------------------------------------------------------------------------

--------------------------------------------------------------------------------

--------------------------------------------------------------------------------

--------------------------------------------------------------------------------

--------------------------------------------------------------------------------

--------------------------------------------------------------------------------

-----------------------------------------ACAACAGACCTGCTCACCCAAGCAATGACAGAACTGTCC

CAGACCTTAAC

>Eulemur_macaco

CTGCCCCAGCAGTTTTAACCACAGACAGTGCCACCGGAGAGACTGTGGTG------------------------------

--------------------------------------------------------------------------------

--------------------------------------------------------------------------------

--------------------------------------------------------------------------------

--------------------------------------------------------------------------------

--------------------------------------------------------------------------------

--------------------------------------------------------------------------------

--------------------------------------------------------------------------------

--------------------------------------------------------------------------------

--------------------------------------------------------------------------------

--------------------------------------------------------------------------------

--------------------------------------------------------------------------------

--------------------------------------------------------------------------------

--------------------------------------------------------------------------------

--------------------------------------------------------------------------------

--------------------------------------------------------------------------------

--------------------------------------------------------------------------------

--------------------------------------------------------------------------------

--------------------------------------------------------------------------------

--------------------------------------------------------------------------------

--------------------------------------------------------------------------------

--------------------------------------------------------------------------------

--------------------------------------------------------------------------------

--------------------------------------------------------------------------------

--------------------------------------------------------------------------------

--------------------------------------------------------------------------------

--------------------------------------------------------------------------------

--------------------------------------------------------------------------------

--------------------------------------------------------------------------------

--------------------------------------------------------------------------------

--------------------------------------------------------------------------------

--------------------------------------------------------------------------------

--------------------------------------------------------------------------------

--------------------------------------------------------------------------------

--------------------------------------------------------------------------------

--------------------------------------------------------------------------------

--------------------------------------------------------------------------------

--------------------------------------------------------------------------------

--------------------------------------------------------------------------------

--------------------------------------------------------------------------------

--------------------------------------------------------------------------------

--------------------------------------------------------------------------------

--------------------------------------------------------------------------------

--------------------------------------------------------------------------------

--------------------------------------------------------------------------------

--------------------------------------------------------------------------------

--------------------------------------------------------------------------------

--------------------------------------------------------------------------------

--------------------------------------------------------------------------------

--------------------------------------------------------------------------------

--------------------------------------------------------------------------------

--------------------------------------------------------------------------------

--------------------------------------------------------------------------------

-----------------------------------------ACGACAGACCTGCTTACCCAAGCAATGACAGAACTGTCC

CAGACCTTAAC

>Galeopterus_variegatus

CCACCCCAGCTGTGTTAACGACAGATAGTGCCACTGGAGAGACCGTGGTG-GT-----GAGTGTATG----ACGGGAA-G

AGCATTTTGTTTCCTTCTGTGCCCATCATATCTTTAAGTGCCAAAGCCATGTCTATCTTGTTATTTAGTT-----GTCTG

CAAATGTAGCTCATTATCCTT------CAGTTTTCCACACAGGGCATTCTGCATATAATTGGATCTCCTAGTTGGTACTT

TCCAAAGCTCTCTGTAAAAGGGGTAGTGAAAAATTGTCAGTGCTGCTTGTT-----------------------CACTAC

AAG--ATGGTCAGAACCTCTAGG-GCA-GCTCCACTGGGTCAGAGCCAGTC-----------------------------

-----------------------------------------------------------AGATATAGATATGGATATA--

--------------------------------------------------------------------------------

--------------------------------------------------------------------------------

--------------------------------------------------------------------------------

--------------------------------------------------------------------------------

--------------------------------------------------------------------------------

--------------------------------------------------------------------------------

--------------------------------------------------------------------------------

--------------------------------------------------------------------------------

--------------------------------------------------------------------------------

--------------------------------------------------------------------------------

--------------------------------------------------------------------------------

--------------------------------------------------------------------------------

--------------------------------------------------------------------------------

--------------------------------------------------------------------------------

--------------------------------------------------------------------------------

--------------------------------------------------------------------------------

--------------------------------------------------------------------------------

--------------------------------------------------------------------------------

--------------------------------------------------------------------------------

--------------------------------------------------------------------------------

--------------------------------------------------------------------------------

--------------------------------------------------------------------------------

--------------------------------------------------------------------------------

--------------------------------------------------------------------------------

--------------------------------------------------------------------------------

--------------------------------------------------------------------------------

--------------------------------------------------------------------------------

--------------------------------------------------------------------------------

--------------------------------------------------------------------------------

--------------------------------------------------------------------------------

--------------------------------------------------------------------------------

--------------------------------------------------------------------------------

------------------------G-------------------------------------------------------

--------------------------------------------------------------------------------

--------------------------------------------------------------------------------

--------------------------------------------------------------------------------

--------------------------------------------------------------------------------

----------------------------------------------------------------------AGGTCATGTT

CT-------GACACC-----------------------------------------------------------------

--------------------------------------------------------------------------------

--------------------------------------------------------------------------------

--------------------------------------------------------------------------------

----------------TTCTCGTCCTCAG-------ATTTTT-----TTTCTCTCTGGGCTCAGGGCTAATGTGTAG-CT

CATTAATCCACCAGTGAGA--------------CAAACTA----------------------------------------

--------------------------------------------------------------------------------

---------------AATTTTAGTAGGATTTAGGAGC-----------------------------------------AC

TGAAATTGCTAT-------------------------------------------------AAACAAGTGTTCCCAACTC

GTGTGT----TCTGTGTGATTTTTTTCT----------AG-ACAACAGACCTGCTAACCCAAGCAATGACAGAACTGTCC

CAGACCTTAAC

>Tupaia_chinensis

CCACCCCGGCCGTCCTAGCGACCGACAGTACCACCGGGGAGACGGTGGTG-GT-----GAGTGCGGG----GCAGGAA-G

GGCATCCC--TCCCTGCGGTGCCGTGGTC--TCTTCAGCACC----TCGTGGTGGTCCAGGCACCT--CT-----GGCTG

CAA--GTTACCCAGCAGGCTT-------TCTCCCCCACACCAGGCGTG--GGCCGTGAC---GCCTCCTGGTC---CCTC

CCCAGAACTCTGCCTAGAGGGC---GCGAGACCTCTCAGCT----CTCATT-----------------------CACGGC

-AG--ATGGTCAGCGCCTCTAGG-GCG-GCTCCGTGGGGTCCGACAGAGCTTGAACTCGGCAGAGATGTGGTGTCGAGAC

AG-------------ACAGAGACAGGGACAGCACTGGGCCCTGCTGGGGAAGCGCGTTAGAGGTCAGGCATAGAGATGGC

CGTCGCTGAAGATGGGGAGGGAGGCA------------------------------------------------------

--------------------------------------------------------------------------------

--------------------------------------------------------------------------------

--------------------------------------------------------------------------------

-------GGGTCAGAGTCCACCTGG-------------------------------------------------------

--------------------------------------------------------------------------------

--------------------------------------------------------------------------------

--------------------------------------------------------------------------------

--------------------------------------------------------------------------------

--------------------------------------------------------------------------------

--------------------------------------------------------------------------------

--------------------------------------------------------------------------------

--------------------------------------------------------------------------------

--------------------------------------------------------------------------------

--------------------------------------------------GCTTCAGAGAGACAGGTGTGGATGCAGAGA

TAGGAATAAACATACAGAGGTC----------------------------------------------------------

--------------------------------------------------------------------------------

------CAGAGAGAGCCGTCTGGAGGATAGTGACAGAGGTAACAGAGAGAGACTGCTATGGGGTCAGCAGGGTTAAGTGG

CATTGGGGGTTAAGGGGG--------------------------------------------------------------

--------------------------------------------------------------------------------

--------------------------------------------------------------------------------

--------------------------------------------------------------------------------

--------------------------------------------------------------------------------

--------------------------------------------------------------------------------

--------------------------------------------------------------------------------

--------------------------------------------------------------------------------

------------------------CAGACCCCACACATCCAACATGTGGTTCTAGTCCAGATCCGGTGCCTAGAAAGACA

TGCGAGGTATGTGCGTGCGTTCCCAGAATCCAGAGAAC------------------------------------------

--------------------------------------------------------------------------------

----------------------------------------------------------------AAGGAGAA-GGGTTGC

AGCATGGCCGTGTTCCCCTGGGAGCTTTCTTACTCCCCTCCTCTCACTGTCTCTCTCTGGTGAGCCCATGTGCCGT----

--------------------------------------------------ATAGTAAAAATGGTCAAAAAGAGGGGCCAG

CAGGTGGCATGGTGGTTAAGACGCT-------------------------------------------------------

--------------------------------------------------------------------------------

--------------------------------------------------------------------------------

--------------------------------------------------------------------------------

--------------------------------------------------------------------------------

----------------------------------------------------------------------GGGCACTCCC

ACGTGGTCAACCGCAGTTTGA-----------------------------------------------------------

--------------------------------------------------------------------------------

--------------------------------------------------------------------------------

--------------------------------------------------------------------------------

----------------GTCCCAGCCCTGGTGACTTGCTTTCTCACTTTCTCTCTCTCTTTCTGGGTC-------------

-----GCTCTCTAGTCAAATTAAAATAAATGAATGAATAAATAAAATTTAAAAAATTAAAAAAGAAAAGAAATAGAAGAA

ATAGAAATAGAGTCACAGGCACAGAAGGGGAGATGCAGGTGCCGAGGTGGAGGGACACACAGAGATGGATGGCAGAGACG

TACTGAGAAAGA-CGGAT----GTGGGGATGGAGGGCTCATCTCCCAGACCCTCCCGGTGTCCGGGCCATCCTGCCGGGC

TGAGCGGGCTGCGTCATGCTTGTGGCCCCGCAGCGCGGCCCCGGAAGGCAGTGGGGATGGAGTGCCAGCGTCGGTGTCTA

ACGCGTCCTGTCCGTGTGGCTGTTGC------------AG-ACCACAGACCTGCTTACTCAAGCGATGACGGAACTGTCC

CAGACCTTGAC

>Mus_musculus

CCACCCCAGCTGTCTTAACGACAGATAGTGCCACTGGAGAGACTGTGGTG-GT-----AAGTGGGCG----ACTTGGAAG

AGTGTCTTAT-TCCTTCAGTGCCCCTCCTCTCTTT--ACAACAAGGCCATGCCAATTATCTATCAATATT-------TTG

CCAATAGGGCTCCTTACCCTCAGCTTGCTGCTTGCTGCTTCTAGCATTGTGCTTATGCTTGGGTCTCCTTGCCGGTGCCA

TCTATATCTCCCTGCCAAAGGAGGAGCAGGACATTTTTTTTTTTTTTTTTTTTTTTTTTTATTATATGTAAGTACACTGT

-AGCTGTCTTCAGACACTCCAGAAGAGGGCATCA--GATCTTGTTACAGAT-----------------------------

-----------------------------------------------GGTTGTGAGCCACCATGTGGTTGCTGGGATT--

--------------------------------------------------------------------------------

--------------------------------------------------------------------------------

--------------------------------------------------------------------------------

--------------------------------------------------------------------------------

----------------------TGA-------------------------------------------------------

--------------------------------------------------------------------------------

--------------------------------------------------------------------------------

--------------------------------------------------------------------------------

--------------------------------------------------------------------------------

--------------------------------------------------------------------------------

--------------------------------------------------------------------------------

--------------------------------------------------------------------------------

--------------------------------------------------------------------------------

--------------------------------------------------------------------------------

--------------------------------------------------ACTTCAGACCTTTGGAAGAGCAGT------

--------------------------------------------------------------------------------

--------------------------------------------------------------------------------

--------------------------------------------------------------------------------

--------------------------------------------------------------------------------

--------------------------------------------------------------------------------

--------------------------------------------------------------------------------

--------------------------------------------------------------------------------

--------------------------------------------------------------------------------

--------------------------------------------------------------------------------

--------------------------------------------------------------------------------

--------------------------------------------------------------------------------

--------------------------------------------------------------------------------

--------------------------------------------------------------------------------

--------------------------------------------------------------------------------

--------------------------------------------------------------------------------

--------------------------------------------------------------------------------

--------------------------------------------------------------------------------

------------------------C-------------------------------------------------------

--------------------------------------------------------------------------------

--------------------------------------------------------------------------------

--------------------------------------------------------------------------------

--------------------------------------------------------------------------------

----------------------------------------------------------------------GGGTGCTCTT

ACCCACTGAGCCATC-----------------------------------------------------------------

--------------------------------------------------------------------------------

--------------------------------------------------------------------------------

--------------------------------------------------------------------------------

----------------TCACCAGCCCCAAGCAGGACATTTTTAACGCCTTCCTTCTCAGTGGAGAAATGAGCAGTGCCGG

TTCAGATCCACTGGTCAGAGTCAGGCCCTCAGGCCAGTCT----------------------------------------

----------------------------------------------------------------GTGTTTCCTTGATGTG

CCCCATGCCAAACCGAATTGTAGCAGGATTTAAGAGT-----------------------------------------AT

TGAGACTGCTAC------------------------------------------------------AGTGTTGTTA-CTA

ATATGC----TTTGTGATTTTTTTTTTTTTCCT-----AG-ACAACAGACCTGCTAACTCAGGCGATGACAGAACTGTCC

CAGACCTTAAC

>Ochotona_princeps

CCACCCCAGCCGTCCTGACGACAGATAGCACCACTGGAGAGACCGTGGTG-GT-----AAGCGTGTG----GCAGGCAGG

AGCCTCTCCTCTCCTGCAGTGTCCTGGACTCTTCCCAGTGCCAGAGCCATGTCCATCTTGCTCATCAGTG-----GGCTG

CACACATAACCCGTCAT----------CAGTTTTCTACTGAAGGCATTAAGACTAAGATTGGGTTTCCTGGCTCA-GCGT

TCCGGAGCTCGGTGTCAAAGGGCCATCGTGACGT-TTCAGTGCTGCTGA-G-----------------------GGCTAC

AGG--ATTGTCAGGTCCTCGAGA-GCA-CCCACCCTGGGCCACAAGCAGAC-----------------------------

-------------------------------------------------------------AGGCAGGCGTGGGTCAG--

--------------------------------------------------------------------------------

--------------------------------------------------------------------------------

--------------------------------------------------------------------------------

--------------------------------------------------------------------------------

--------------------------------------------------------------------------------

--------------------------------------------------------------------------------

--------------------------------------------------------------------------------

--------------------------------------------------------------------------------

--------------------------------------------------------------------------------

--------------------------------------------------------------------------------

--------------------------------------------------------------------------------

--------------------------------------------------------------------------------

--------------------------------------------------------------------------------

--------------------------------------------------------------------------------

-----------------------------------------------------TCATGGCTGCTGATGTGGATGGA----

--------------------------------------------------------------------------------

--------------------------------------------------------------------------------

--------------------------------------------------------------------------------

--------------------------------------------------------------------------------

--------------------------------------------------------------------------------

--------------------------------------------------------------------------------

--------------------------------------------------------------------------------

--------------------------------------------------------------------------------

--------------------------------------------------------------------------------

--------------------------------------------------------------------------------

--------------------------------------------------------------------------------

--------------------------------------------------------------------------------

--------------------------------------------------------------------------------

--------------------------------------------------------------------------------

--------------------------------------------------------------------------------

--------------------------------------------------------------------------------

--------------------------------------------------------------------------------

------------------------G-------------------------------------------------------

--------------------------------------------------------------------------------

--------------------------------------------------------------------------------

--------------------------------------------------------------------------------

--------------------------------------------------------------------------------

----------------------------------------------------------------------AGAGAGTCTG

CC-------AGCATC-----------------------------------------------------------------

--------------------------------------------------------------------------------

--------------------------------------------------------------------------------

--------------------------------------------------------------------------------

----------------CTCTCAAACTCAG-------ATTTTT----TTTTCTCTCTGGCCCCAGGGCTAATTGGTAGCTC

TGT--ATCCATCTGGGAGA--------------CAAACTG----------------------------------------

--------------------------------------------------------------------------------

---------------CATTTCAGTAGGATTTAAGCAC-----------------------------------------AC

TGGAATAGTTAC---------------------------------------------------AGTAGTGTTACCAATGA

CTGCAT----TTTTTTTTTTTTTTTTTTTTTGT-----AG-ACAACAGACCTGCTAACCCAGGCAATGACAGAATTGTCC

CAGACCCTAAC

>Bos_taurus

CCACGCCAGCTGTCCTAACTACGGACAGTGCCACTGGAGAGACCGTGGTG-GT-----AAGTGTGAG------CGGAAAG

CACCTCTCCTGTCCTTCC-TGCCTGTCACAGC-TCCAGGGCCAAGGCCACGTGTCTCTTGGTGTTTAATT-----GGCTG

GAGATGTAGCCCACCACCCTT------CAGTGTCCTATGCGAGGCACGATGTTTCTGCCTGGGTCTCCCAGTCGGTGCTT

TCCAAAGCTGTCTGTGAAAGGAACAGCAGGAAATCCTCAATGCTGCCTGTT-----------------------CATCCC

AAG--ACTCTCAGAACCTCTGGG-CTA-ACTCCCCTG--CCTGACACAGAT-----------------------------

-------------------------------------------------------------AGACCGAGATAGAGAGG--

--------------------------------------------------------------------------------

--------------------------------------------------------------------------------

--------------------------------------------------------------------------------

--------------------------------------------------------------------------------

--------------------------------------------------------------------------------

--------------------------------------------------------------------------------

--------------------------------------------------------------------------------

--------------------------------------------------------------------------------

--------------------------------------------------------------------------------

--------------------------------------------------------------------------------

--------------------------------------------------------------------------------

--------------------------------------------------------------------------------

--------------------------------------------------------------------------------

--------------------------------------------------------------------------------

-----------------TCATCTTCCAGCACCTTCTTTTTCTTTTTTTAATATTTATTTATCTATTTGACTACGC-----

--------------------------------------------------------------------------------

--------------------------------------------------------------------------------

--------------------------------------------------------------------------------

--------------------------------------------------------------------------------

--------------------------------------------------------------------------------

--------------------------------------------------------------------------------

--------------------------------------------------------------------------------

--------------------------------------------------------------------------------

--------------------------------------------------------------------------------

--------------------------------------------------------------------------------

--------------------------------------------------------------------------------

------------------------CAGATCCTAGTTGTGCCACACAGGATCTTGTTCTAAATGTATTTATTTGTAA----

--------------------------------------------------------------------------------

--------------------------------------------------------------------------------

----------------------------------------------------------------------------TTGA

AGGATAATTGCTTTACATTGTTGTGTTGATTTCTGTCAAACACACATAGGATCTTTCAGCT-------------------

--------------------------------------------------------------GCAACATGTAAACTCTTA

GGTGCAGCATGAGGAATCTGTTGTTCCCTGACTGGGAATCAAACTCAGGCCCCCTGCATTGGGAGTTCTGAGTCCTAGCC

ACCTGACCACCA--------------------------------------------------------------------

--------------------------------------------------------------------------------

--------------------------------------------------------------------------------

--------------------------------------------------------------------------------

----------------------------------------------------------------------AGGAAGTCCC

CC-------AACATC-----------------------------------------------------------------

--------------------------------------------------------------------------------

--------------------------------------------------------------------------------

--------------------------------------------------------------------------------

----------------TTCTTAACTTTGG-------ATTTTT------GTCTATCTGTGCTTAGGACTTATCTGTAG-TC

CCCTGATCCACCAGTAAGA--------------CAAACCGAAGAAAATTTTTTTTTTGATTGAGCTGTGAGGTATGTGGG

ATCTTAGGTCTCCAACCAGGGATCGACCCCATGCCCCCTGCATGGGGAACCCAGAGTCTTAACACTGGACCAGGGAAGTG

TCCCAAGACAAACCAAATTTT-GTAGGATTTCAGAGC-----------------------------------------AC

TGAAATAGCTAC-----------------------------------------------AACCAGCAGTGTTATTAGC-A

ACGTGC----TTCTTGTCATTTTTCT------------AG-ACGACAGACCTGCTAACCCAGGCAATGACAGAGCTGTCC

CAGACCTTAAC

>Canis_familiaris

CTACCCCGGCTGTGTTAACCACAGACAGTGCTACCGGGGAGACCGTGGTG-GT-----AAGTGTGTGA---ACTGGTAAG

AGCACCTCATCCCCTTCAGTGCCTGTCACAGCTTCCAATACCAAAGCCATGTCCATCTCGCTATATAATT-----GGCTG

CAAAGGTAGCCCATTGTCCCT------CACTCTGCTACCCAGGGCCTTAGGCTTATGTTTGGGTCTCCTAGTTGTCCCTT

CGCAAAGTTCTCCGTAGAAGGCATAGCAGGAAATGTCCAACGCTGCTCCTG-----------------------GGCTGC

TAG--ACTGTCGGACCTCTTAGG-TAA-CTCCCATCGGGCCTGATATAGAC-----------------------------

-------------------------------------------------------------AGGTAGATATGGATCTG--

--------------------------------------------------------------------------------

--------------------------------------------------------------------------------

--------------------------------------------------------------------------------

--------------------------------------------------------------------------------

--------------------------------------------------------------------------------

--------------------------------------------------------------------------------

--------------------------------------------------------------------------------

--------------------------------------------------------------------------------

--------------------------------------------------------------------------------

--------------------------------------------------------------------------------

--------------------------------------------------------------------------------

--------------------------------------------------------------------------------

--------------------------------------------------------------------------------

--------------------------------------------------------------------------------

--------------------------------------------------------------------------------

--------------------------------------------------------------------------------

--------------------------------------------------------------------------------

--------------------------------------------------------------------------------

--------------------------------------------------------------------------------

--------------------------------------------------------------------------------

--------------------------------------------------------------------------------

--------------------------------------------------------------------------------

--------------------------------------------------------------------------------

--------------------------------------------------------------------------------

--------------------------------------------------------------------------------

--------------------------------------------------------------------------------

--------------------------------------------------------------------------------

--------------------------------------------------------------------------------

--------------------------------------------------------------------------------

--------------------------------------------------------------------------------

--------------------------------------------------------------------------------

--------------------------------------------------------------------------------

------------------------T-------------------------------------------------------

--------------------------------------------------------------------------------

--------------------------------------------------------------------------------

--------------------------------------------------------------------------------

--------------------------------------------------------------------------------

----------------------------------------------------------------------AGGTAATCTT

CC-------ACCATC-----------------------------------------------------------------

--------------------------------------------------------------------------------

--------------------------------------------------------------------------------

--------------------------------------------------------------------------------

----------------TTCTCACCTTTGG-------AGTTTT-------CCAATCTGAGTTCGGGGCTAATTTG------

--------------------------------------------------------------------------------

--------------------------------------------------------------------------------

--------------------------------------------------------------------------------

---------TAC-----------------------------------------------CAGCAGTGGTGTTGACAGCTA

ATGTAT----TTTTTGTGACTTTTCT------------AG-ACAACAGACCTCCTAACCCAAGCCATGACAGAACTGTCC

CAGACCTTAAC

>Myotis_lucifugus

CTGCTCCGGCCGTGTTAACCACCGACAGTGCCACCGGCGAGACCGTGGTG-GT-----AAGTGTGTG----ACCGGCGAG

AGCATC-----TCCTTCAGGG---GTCACAGCTTTCAGGGCCAGAGTCTTG---------------AATT-----GGCTG

CAAATGTAGC----------------------------------CACTCTGCTTCTGATCGGGTCTCCT-----------

-----------CTGTGAAAGGGGTAG----------TCAGTGCTGCTCATT-----------------------GGCCGC

CAG--GTTGTCCGAACCTTGAGG-GTA-ACCCCACTGGACCTGGCGTAGAC-----------------------------

-------------------------------------------------------------AGATGGATACAGATATG--

--------------------------------------------------------------------------------

--------------------------------------------------------------------------------

--------------------------------------------------------------------------------

--------------------------------------------------------------------------------

--------------------------------------------------------------------------------

--------------------------------------------------------------------------------

--------------------------------------------------------------------------------

--------------------------------------------------------------------------------

--------------------------------------------------------------------------------

--------------------------------------------------------------------------------

--------------------------------------------------------------------------------

--------------------------------------------------------------------------------

--------------------------------------------------------------------------------

--------------------------------------------------------------------------------

--------------------------------------------------------------------------------

--------------------------------------------------------------------------------

--------------------------------------------------------------------------------

--------------------------------------------------------------------------------

--------------------------------------------------------------------------------

--------------------------------------------------------------------------------

--------------------------------------------------------------------------------

--------------------------------------------------------------------------------

--------------------------------------------------------------------------------

--------------------------------------------------------------------------------

--------------------------------------------------------------------------------

--------------------------------------------------------------------------------

--------------------------------------------------------------------------------

--------------------------------------------------------------------------------

--------------------------------------------------------------------------------

--------------------------------------------------------------------------------

--------------------------------------------------------------------------------

--------------------------------------------------------------------------------

------------------------T-------------------------------------------------------

--------------------------------------------------------------------------------

--------------------------------------------------------------------------------

--------------------------------------------------------------------------------

--------------------------------------------------------------------------------

----------------------------------------------------------------------AGGTAACCTT

CC-------AGCATC-----------------------------------------------------------------

--------------------------------------------------------------------------------

--------------------------------------------------------------------------------

--------------------------------------------------------------------------------

----------------CTCTCAGGA-----------ATTTCT-------TCTGTCTGAGTTCAGGGCTAACTTGTAGATT

CCACGATCCACCAGTGATA--------------CCAATGA----------------------------------------

--------------------------------------------------------------------------------

---------------GACTTTTGTAGGGTCTAAGTGC-----------------------------------------CC

TGAAGTAGCTAC-----------------------------------------------AAGCAGTACTGCCATCAACTA

ATGCAT----TTTGTGTGAATTTTCT------------AG-ACAACAGACCTGCTAACCCAGGCCATGACAGAGCTGTCC

CAGACCCTAAC

>Loxodonta_africana

CTACCCCGGCTGTCCTGACCACAGATAGTGCCACTGGGGAGACGGTGGTG-GT-----GAGTGTGTGATGGACAAGTGGG

TGCCTCCTGTCTCCTCCAGTGCCCAGCCTGCCCTTAAATGCCATGGCCATGTCTACCCTGTTATCACCTTCCTCACGCTG

CAAGTGTGGCCCCTTTTTCTT------CAGGTGTCTGCAAAAGGCATTATGCTTATGATGGGGTCTCCTAAGTGATGCTA

CCCAAAGTGCTCTTTGAAAGAG-CAGCGAGAAAATTTCAGTGCTGCTTGTT-----------------------CACTGC

-AG--ATTGTTAGAGCCTTGAGGTGCATTCTCCACTGGGCCTGAGACAGTCTCAGATATATATGCACCACACATGCAAAC

AGGTCATGCTCATCTACTAACCTAAAGCTGGTGGTTTGAACCCACCCAGTGGTGCTGCGGAAGACAGGCCTGGCGATCTG

CTTCCATTAAGATTACGGCCAAGAAAACCCTATGGCGCAGTTCTACTCCATCACATGGGTTTGCTATGAGTTGGAATTGA

CTTGATGGCAATGATATTATATATTTATGTATATATATTTGTTGTTATTGTTAGGTGCTGTCCTGTTGGTTCCAACTCAT

AGCAACCCTGTGTACAACAGAACGAAACACTGCCTGGTCCTGCACCATCCTCACAATCGTTATTATGCTTGAGCCCATTG

TTGCAGCCGCTGTGTCAATCCATCTTGTTGAGGATCTTCCTCTCTTACGTTGACCCTGTACTTTACCAAGAATGACATCT

TTCTCCTGGGACTGATCCCTCCTGATAACATGTCCAAAGTATGTAAGACCCAGTCTCGCCATCCTTGCTTCTAAGAAGCA

TTCTCATTGTACTTCCTCCAAGCCAGATTTTTGTTCATTCTTTGGTCCAGGGTATATTCAATATTCTATGCCAATACCAC

AATTCAAAGGCATCAATTCTTCAGTCTTCCTTATTCGTTGTCCAGCTTTCACATGCATATAAGGTGATTGAAAACACCAT

GGTTTGGGTCAGGCGCACCTTAGTCCTTAAGGTGACATCTTTGCTCTTCAATACTTTAAAAAGGGCCCTTGCAGCAGATC

TGCCCAATGCAGTTCGTCTTATGATTTTTCGACTGCTGCTTCCATGGGTGTTGATTGTGGATCCAAGTAGAATGAAATCC

TTGACAGCTTCAATCTTTTCTCCATTTATCGTGATGTTGCTCATTGGTCTGGTTGTGAGGATTTTTGTTTTCTTTATGTT

CAGGTGTAATCCATATTGAAGGCTGTGGTCTTTGATCTTCATCAGTAAGTGCTTCAAGTCCTTTTCACTTTCAGCAAGCA

AAGGTTGTGTCATCTGCTCATCTCCTGGTGTTAATGGGTCTTCCTCCAGTCCTGATGCCCCATTCTCCCTTCACATAGTC

CAGTTTCTCGGGTTATTTGCCCAGCATACAGACTGAATACGTATGGTGATAGGATACAACCCTGACACACACCTTTCCTG

TCTTTAAACCACACAGTACCCCCTTGTTCTCTTCGAGTGACTGTTTCTCGATCTATGTACAGGCTCCTCATGAGCACAAT

TAAGTGTTCTGGAATTCCCATTCTTCACAATGTTATCCATAATTTGTTATGATCCACACAGTCAAATGCCTTTGCATAGT

CAATAAAGCACAGGTAAACATCCTTCTGGTATTCTCTGCTTTCAGCTAGGATCCATCTGACATCAGCAATGATATCCGTT

GATCCACATCCTCTCCTGAATCCAGCTTGAATTTCTGGCAGTTCCCTGCCAATATACTGCTCCAGCTGCTTTTGAATTAT

CTTTGGCAAAATTATACTTGTGTGTGATATTAATGATATTGTTCGATAATTTCTGCATTTGGTTGCATCGCCTTTCTTGG

AAATAGGCATAAATATGAATCTCTTCCAGTCAGTTGGCCAGGTAGCTGTCTTCTAAATTTCTTGGCGTAGATGAGTGAGC

ACTTCAAACGCTGCATCCGTTTGTTGAAACATCTCAAGTGGTATTCTGTCAATTCCTGGAGCCTTGTTTTTTGCCAGTGC

TGTCAGTGTAGCTTGGACTTCTTCCTTCAGTACCGTTGATTCCTGATTATATGTTACCTCCTGAGATGGTCGAATGTAGA

CCAATTCTTTTTGTTATAGTGACTCTGTATATTCTTTCCATCTTCTTCAGATGCTTCCTGCATTGTTTAATATTTTCCCT

GCAGAATCCTTCAGTATTGCAACTTGAAGCTTGAATTTTTTCTTCAGTTCTTTCAGTCTGACAGATGCTGAGCGTGTTCT

CCCCTTTTGGTTTTCTGTCTCCAGCTCTTTGCATATGTCATTATAATACTTTGCTTTGTCTTCACAAGCTGCCCTTTGAA

ATCTTCTTTTCAGCTCTTTTACTTCATTTCTTCCTTTTGCTTTAGCTACTTGACATTCAAGAGCACATTTCAGAGTCTCA

TCTGACATCCATTTTGGTCTTTTCTTTCTCGTCTGTCTTTTTAATCACTTCTTACTTTCTTATGTATGCTGTCCCTCATA

TCATTCCACAACTTGTCTGGTCTTTGGTCATTAGTGCTCAACATGTCAAATCTATTCTTGAGATGGTCTCTAAATTCAGG

TGAGATATACTTAAGGTCATACTTTGGCTCTCATGGACTTGTTCTAATTTTCTTCAGAGTAATTGTATGATTCATAGTCG

ACCCCTGGTCTTATTCTGACTGATGATATTGAGCTTTTCCATTGTCTCTTTCCACAGATGTAGTCGATTTGATTCCTGTA

TTTTCCATCTGGCAAGGTCCACGTGTATAGTTGCCATTTATGTTGGAGAAAAAAAGTATTTGCAACGAAGAAGTTGTTGG

TCTTCCAAAATTCTATCATGTGATCTCTGGTATCCTTTCTATCACCAAGGCTATATTTTCCAACTACCAATCCTTCTTCT

TCGTTTCCAACTTTTGCATTCCAATCACCAATAATTATCAATGCATCTTGATTGCATGATTGATCAATTTCAGACTGCAG

AAGTTGGTAAAAGTACTCAATTTCTTCATCTTTGGCCTTAGTGGTTGGTGCATAAATTTGAATAATAGTCGTATTAACTG

GTCTTCCTTGTAGATGTATGAATATCATCCTATCACTGACAGCATTGTACTTCAGGATAGATCTTGAACTGTTCTTTTTA

ACGATGAACGCAATGCCTTTCCTTTCCAAGTTGTCATTCCTGGCATAGTAGACCATATGATTATCTGATTCAAAATGGTC

AATACCAGTACATTTCAGCTCAGTTATGACTAAGATATTGATGTTTATGTGTTCCATTTCATTTTTGACAATTCCAATTT

TCCTAGATTCATACTTTGTACATTCCACGTTGTAATTGTTAACGGATGTTTGCGGCTGTTTCTTCTCATTTTGAGTTGTG

CCACATCAGCAAATGAAGGTTCTGAAAGCTTGACTCCATCCACATCATTAAGGTTGACTCTACTTTGAGGAGGCAGCTCT

TC---CCAAGTCATCTTTTGAGTGCCTTCCAACCTGAGGGGCTCATCTTCTGGCACCATATCAGTGTTCTGCTGCAATTT

GTAAGGTTTTCACTGGCTAATTCTTTTCAGAAGTAGACTGCCGGGTCCTTCTTCCTAGTCTTTCTTAGCCTGGAAGCTCA

GCTGAAACCTGTGCACTGTGGGAGACCCTGCTGTTACTTGAGTACTGGTGGCATAGCTTCCAGCATCACAGCAACATGCA

AGCCCCCACAAACTGAGAGACACGTGGGGTATATCTATATCTATCTATCTAGATAGATATATATACGATTATATTTATTT

TTTTCCTTCCAAAATTTTCCCAACCTCAG-------TTTTTTTTTTTTCTCTCTCTTGGTTTGGGTCTGATTTTTAG-TT

TGATGATACACCAGTGAGA----------CAAGCTAATTA----------------------------------------

--------------------------------------------------------------------------------

---------------AATTTTAGTAGGATTCAAGAGC-----------------------------------------AT

TGAAATAGCTAC----------------------------------------------------AAAGAGCTACCAACCA

GCATGT----TTTGTGTGATTTTTCC------------AG-ACAACCGACCTGCTCACCCAAGCAATGACTGAACTGTCC

CAGACCTTAAC

**IL4**

>Mus_musculus

CCAGCTCATGAAGACAGCACTCAAAGAAGATGGCATCCTGTGCTGCCAGG------------------------------

--------------------------------------------------------------------------------

-----------------------------------------------------GTGAGTGCCAGTGGCTGCACCTGGACC

TCATCAAGGAGATGAGGCACTTC

>Mus_spretus

CCAGCTCATGAAGACAGCACTCAAAGAAGATGGCATCCTGTGCTGCCAGG------------------------------

--------------------------------------------------------------------------------

-----------------------------------------------------GTGAGTGCCAGTGGCTGCACCTGGACC

TCATCAAGGAGATGAGGCACTTC

>Rattus_norvegicus1

CCAGCTCATGAAGACAGCCCTCAAAGAAGATGGCATCCTCTGTTGCCAGG-GT-----GAGCAT--GGGC----ACAGTG

GGGTGCA---GGGTGGGCCGGC----CGCCTCTCTGTGGCAGGG------------------------------------

----------------------CTGACT-CCTGGCCTCCCCC-AC-----AG-GCGAGTGCCAGTGGCTGCACCTGGACC

TCATCAAGGAGATGAGGCATTTC

>Rattus_norvegicus2

CCAGCTCATGAAGACAGCCCTCAAAGAAGATGGCATCCTCTGTTGCCAGG-GT-----GAGCAT--GGGC----ACAGTG

GGGTGCA---GGGTGGGCCGGC----CGCCTCTCTGTGGCAGGG------------------------------------

----------------------CTGACT-CCTGGCCTCCCCC-AC-----AG-GCGAGTGCCAGTGGCTGCACCTGGACC

TCATCAAGGAGATGAGGCATTTC

>Cricetulus_griseus

CCAACTTATGAAGACGGCACTCAAGGAAGACGGCATTCTTTGCTGCCAGG-GT-----GAGTAT--GGGC----ACAGTG

GGGTGCT---GTGTGGGCCAGC---TGCCCTCTCTGTAAGAAGG------------------------------------

----------------------CTGACT-CGCAGCCTCCCCCCAC-----AG-GTGAGTGTCAGTGGCTGCATCTGGACC

TTATCAAGGAGATGAGGCACTTC

>Microtus_ochrogaster

CCAGCTCATGAAGACAGCACTCAAGGAAGATGGCATCCTTTGCTGCCAGG-GT-----GAGCAT--GGGC----ACAGTG

GGATACA--CGATTGGGCCATC---TGTTCTCTCTGTGGTAAGG------------------------------------

----------------------CTGACC-CACAACTCCCCC--AC-----AG-GTGAGTGCCAGTGGCTGCACCTAGACC

TCATCAAGGAGATGAGGCACTTC

>Nannospalax_galili

CCAGCTCATGAAGACGGCGCTCAAAGAGGATGGCATCCTCTGCTGCCAGG-GT-----GAGCAT--GGCCCTGGACAGGC

TGGTG-----GGGTGGGAGAGT---TCCCCTCACCAAGGCAGGG------------------------------------

----------------------CTGACC-TGCAGCCTCCCCC--------AG-GTGAGTGCCAGTGGCTGCACCTGGACC

TCATCAAGGAGATGCGGCAGTTC

>Jaculus_jaculus

TCAGCTCATGAAGACGGCGCTCAAGGAGGATGGCATCCTCTGCTGCCAGG-GT-----AAGTGT--GGCCACAGGCAGTT

GGACTGG-CAGGGTGGGACAG-----------GCCATTGTATGGG-----------------------------------

----------------------CTGACC-CGAAGCCTCCCTC--------AG-GCGAGTGCCAATGGCTACACCTGGACC

TCATCAAGGAGATGCGGCAGTTC

>Castor_canadensis

CCAGCTCATGAAGACGGCACTCAAGGAGGATGGGATCCTCTGCTGCCAAG-GT-----GAGT----GAGGCTGGGTAGTG

GTGGCCG---ATGAGGTGCTGC--------TCCCAGTGGGCAGGGTGGGCTCCTTGCTGACA------------------

----------------------CTGAC--CCTTGCCTCCCC---------AG-GTGAGTGCCAGTGGCTGCACCTGGACC

TCATCAAGGAGATGCGGCAGTTC

>Cavia_porcellus

CCAGCTCATGAAGACGGCGCTGAAGGAGGACGGCGTCCTCTGCTGCCAGG-GT-----GAGCAC-----------CGGGC

GGGC------GGGCGGGCGGGCAGGTGACCGGCCCGCAGCTGAGGCTCATGTGCTGCCA---------------------

----------------------CCGCCCGCCCGCCCGCCCCC--------AG-GTGAGTGCCAGTGGCTGCACCTGGACC

TCATCAAGTCGATGCGGCAGTTC

>Homo_sapiens

CCAGCTCATGAAGACAGCCCTCAAGGAAGATGGTGTCCTCTGCTGCCAGG-GT-----GAGCCACAGGCCTGGAGCACTG

GGGCGGGGCGGGGTGGGGCAGGGCAGGCCCTGCCGGATG-----------------------------------------

----------------------CTGATG-CTTAGGGGCCCCC--------AG-GCGAGTGCCAGTGGCTGCACCTGGACC

TCATCAAGGAGATGCGGCAGTTC

>Bos_taurus

CCAGCTCATGAAGACTGCCCTCAAGGAGGACGGCATTCTCTGCTGCCAGG-GT-----GAGG----GGGCTAGGGTGGAC

TGGGTGC---TGCTGGGTGAGC---CGGGCTCCCGCCGGGAGGGGTCCGGCTGGGGCTGGACCAGGCACTGCCCCCAGCC

AGTGCTGACATCATCTGACCACCCGCCC-CCGACCCCCCCACCGT-----AG-GTGAGTGCCAGTGGCTGCACCTGGACC

TCATCAAGGAGATGCGGCACTTC

>Loxodonta_africana

CCAGCTCATGAAGACTGCCCTCAAGAAGGATGGCATTCTCTGCTGCCAGG-GT-----CAGCCC--AGCCTCAGGCAGTG

AGGTGGG-GTGGGTGGGACAGCATGCCCCGCCCCAGCCACCCATG-----------------------------------

----------------------CTGAC--TCTGCCCACCTCCCTC-----AG-GTGAATGCCAGTGGCTGCACCTGGACC

TCATCAAGGAGATGCGGCAATTC

**IL5**

>Mus_musculus

TGTCCAAAATCATCCCAGACTGCTCTATGGAGAGCACCAAGTCTGGCCAG------------------------------

--------------------------------------------------------------------------------

--------------------------------------------------------------------------------

--------------------------------------------------------------------------------

------------AGTAAAGGTGGAATCCTGTCCAAAGCCTGTGATTATATCCAGGAGCTGCG

>Mus_spretus

TGTCCAAAATCATCCCAGACTGCTCTATGGAGAGCACCAAGTCTGGCCAG------------------------------

--------------------------------------------------------------------------------

--------------------------------------------------------------------------------

--------------------------------------------------------------------------------

------------AGTAAAGGTGGAATCCTGTCCAAAGCCTGTGATTATATCCAGGAGCTGCG

>Rattus_norvegicus

TGTCCAAAATCATCCCAGACTGCTCTATGGAGAGCACCAAGTCTGGCCAG-GT-----CCTGGCAAGACCCTGGTAACGG

GCAGGAGGCTAGAGTTCGGGAGGCAGA-----ACTCCAAGAAT----GGTGTCAAGTAGAGTGTCCATGGCGGCC--CTC

TCCGTAACACTCT---------------------GAGATGCTGCATCCCCACTCTGAG------GAGAGAT--AGCCCTA

AAGTGTGAATGTGCTCGCTCTTGGAAG-GCCAGCTGGGTGTTCG-AGGCTTCCACCCTCACCTTGT---TGGCTTTGCCT

TG-C-----AG-AGTAAGGGTGGAATCCTGTCCAAAGCCTGTGACTATATCCAGGAACTACG

>Cricetulus_griseus

TGTCCAAAATCATCCCAGACTGCTCTATGGAGAGCACCAAGTCTGGCCAG-GT-----CATGGAAAGACCCTGGTAGCAG

GGAGGGGGCTAGAGTTGTGTCTCCTGGCATTGTTTTCAGAAGT----GGTGGGGAGTAGTGCTCA--TGACAGTCCTTTT

TTCTTAATACTCT---------------------GAGATACTGTATCACCATTCTGAG------GGGAAAC--AGGCTGA

AAGTATGAGTGTGCTC----TTGGAAG-GTAAGCTAG-TGTTTT-AAGCCTTTGTCCTCATTTTGT---TGGCTTTGCCT

TG-C-----AG-AGTAAAGGTGGAATCCTATCCAAAGCCTGCGATTATATCCAGGAGCTGCG

>Microtus_ochrogaster

TGTCCAAAATCATCCCAGACTGCTCTATGGAGAGCACCAAGTCTGGCCAG-GT-----CATGGAAAGGCCCTGGTAGCAG

GGAGGAGGCTAGGGTTCTGTCTCCTGGCATTATTTTCAGAAACAAACGGTGGCAAGTAGTGTTCA--CGGCACTCCACTT

TTCCTCATACTCTCT-------------------GAGACGAT-TGTCACCACCCTGAG------GGGCGT---GGGCTGG

AAGTATGAGTGTGCTC----TTGGACA-GAAAGCGGGGTGTGTT-AAGCCTTTGTCCTCATTTTGT---TGACTTTGCCT

TG-C-----AG-AGTAAAGGTGGAATCCTATCCAAAGCCTGTGATTATATCCAGGAGCTGCG

>Nannospalax_galili

TGTCCAAGATCATCCCAGACTGCTCTATGGAGAGCACCAAGTCTGGCCAG-GT-----CATGGAAAGACCCTGGTAGTGG

GCAGGAGGCCTGAATTCTGTCTCCTGGTATT-TTTCCAGAAAT----GGTGGAGAGTGGGGTATACTTGATAGTATTTTC

ATAACATCTCTCT---------------------GAGATGTTACATCACCATTCTCAG------GGGAAACTGAGGCCCA

AAGTGTGACTATGCTT----TTGGGAATATGCGCTAGATCCCTT-AAGCCTTAGTCTTCATTTTGTGAGTTTTTTTATTT

TG-C-----AG-AGTAAAGGTGGAATTCTATCCAAAGCCTGTGATTATATCCAGGAGCTTCG

>Jaculus_jaculus

TGTCTAAGATCATCCCAGACTGCTCTATGGAGAGCACCAAGTCTGGCCAG-GT-----CATGAAAAGACCCTGGTAGTGG

GCAGGAGGCCTGAATTCTGTCTCCTGGTATTGTTCCCAGAAGT----GGTGGAGAG--GGGCACAGATGGCAGGAATTTT

TTCATATCTCTTCCTGAGGTGCTTATATCCATGGGAGATGTTGCATCACCATTCTGAG------AGGAAACTGAGGTCCA

AAGCATGAACGTGCTT----TTGGAAA-GCAAGCTAACTGTCTT-AGACCCTAGCCCTCATTTTAA---TGGCTTTGTCT

TG-C-----AG-AGTAAAGGTGGAATTCTATCCAAAGCCTGCGATTATATTCAGGAGCTTCG

>Castor_canadensis

TGTCCAAGATCATCCCAGACTGCTCTATGGAGAGCACCAAGTCAGGCCAG-GT-----CACAGAAAGACCCTGGTGGTGG

GAAGGAAGCCTGATTTCTGTCTCCTGGTGTTGTTTCCAGAAAT----GGTAGAGAGTGGAGCACA--TGGCAGTAGTCTT

TGCACA----TCTCTGAGGTTACTGTATCCTTGGGAGATGCTATATCACCATCCAGAG------GGGAAAATGAGGTCCA

CAGTGTGAATGTGTTT----GTAGAAA-GCAAGCTGGCTGTCTT-AAATCATAGTCCTCTTTTTGC---TGACTTTGTCT

TG-C-----AG-AGTAAAGGTGGAATTCTATCCAAAGCCTGTGATTATATCCAGGAGCTTCG

>Cavia_porcellus

TGTCCAAGATCATCCCGGACTGCTCAATGGAGAGCACCAAGTCTGGCCAG-GT-----CATGGAAGAGCCCTGGTAGTGG

ACAGGAGGCCTGAATTCTGTCTCCTGG---TGTTCCCAAACAT-------ACAGAGCGGGGCACAAAGGGCAGCTG-TCT

TTCGTATTCTTTTCTGAGGGTCCGGTATTCGTGGAAGATGTTATACCACTATTTTTAGCAGGGAGGAGGAATGAGGTCCA

AAACGTAGTTGTGTTT----TTGGGAA-ATAGGCAGGATATCTT-AAATCCTCATCCTCATTTTGT---TGTCTTTATCT

TA-C-----AG-AGTAAAGGTGGAATTCTATCCAAAGCTTGTGATTATATCCAGGAGCTTCG

>Homo_sapiens

TCTCCAAGATAATCCCAGACTGCTCTATGGAGAGCACCAAGTCTGGCCAG-GT-----CATGGAAAGACCCTGGTAGTGG

GCAGGATGCCTGAATTCTGCCTCCTGGTATTGTTTCCAGAAAT----GGTAGAGAGAGGGGCACACATGACAGTAG----

-TCTTATCTCTCCCTGAGGTTCCTGTATCCCTGGGAGATATTATACCACCTTCCTTAG------ATGAAAATGAGGTCCA

AAGTGTGAACCTACTT----TTGGAAA-GCAAGCTGGGTATCTG-AAATCCTAGTTCTCATTTTGT---TGACCTTATCT

TG-C-----AG-AGTAAAGGTGGGATTCTATCCAAAGCTTGTGATTATATCCAGGAGCTTCG

>Bos_taurus

TGTCCAAGATCATCCCAGACTGCTCCATGGAGAGCACCAAGTCCGGCCAG-GT-----CATGGAAAGACCCTGGTAGTGG

-CAGGATGCCTGAATTCTGTCTCCTGGTGTTGCTTCCAGAAAT----GGTAGACAGT-GGGCACACATGGCGGTAGCTCT

TTCCTGTCTGTCTCTGAGGTTCCTGAATCCCTGGGAGAATTTATTCCACCACCCTTTA-----AGGGAAAACAAGGTCCA

GAGGGTGAACATGCTT----TTGGAAA-GCAAGCCAGGTATTTTTATATCCTAGTCCTTATTGTGT---TGGCTTTTTCT

TAAC-----AG-AGTAAAGGTGGAATTCTATCCAAAGCCTGTGATTATATCCAGGAACTTCG

>Loxodonta_africana

TGTCCAAGATCATCCCCGACTGCTCTATGGAGAGTACCAAGTCTGGCCAG-GT---------------------------

-CAGTATGCCCGAGTAATGTCTCCTGATACTGCTTCCAGAAGT----GCTAGAAAGTGGGGCACA-GTGTCAGTGG-TCT

TTTTTCCTTCTCTCTGAGGTTCCTCTATCCCTGGGATATGTTACATCACCATCCTT-G------GGGGAAATGAGGTCTG

AAGTCTGCAAGTGCTT----TTGGAAA----------GTAGCTT-AAATCTTGGTCCTCCTTTTGC---TTTCATTTTCT

TG-C-----AG-AGTAAAGGTGGAATTCTATCCAAAGCCTGTGATTATATTCAGGAGCTTCG

**IL6**

>Mus_musculus

TATATCAGCGTTGCGTAAACCTAGTTCAGAAGACTCTGGCACAAGCCATG------------------------------

--------------------------------------------------------------------------------

--------------------------------------------------------------------------------

--------------------------------------------------------------------------------

----------------------------------CTAAACAATGCTCAACCAGAACAGTATGAAGCTCCAGATAAAGATT

TTAT

>Mus_spretus

TATATCAGCGTTGTGTAAACCTAGTACAGAAGACTCTGGCACAAGCCATG------------------------------

--------------------------------------------------------------------------------

--------------------------------------------------------------------------------

--------------------------------------------------------------------------------

----------------------------------CTAAACAATGCTCAACCAGAACAGTATGAAGCTCCAGATAAAGATT

TTAT

>Rattus_norvegicus

TGTATCAGCGTTGTGTAAACCTGGTACAGAAGACACTAGCACAAGCCATG-GT---------------------------

---------------------------ATGTGTGTGTATATACACTTTTTTTTTAGTT----------------------

-----------------------------------------------------------------------ATTTTTTTC

CTTCCTCTCATAAAC-TTTTTTTAGAGATAG-GTATAAATAATATGTACACATTTTTTTAGTGTCCAAC----AACAAA-

--------GATAATATGTTTAATTTC-----AG-CTAAACAATGCTCAGCCAGAACAATATGAAGCTCCAGATAAAGACT

TTAT

>Cricetulus_griseus

TGTATCAGCGTTGTGTAAACCTGGTACAGAAGACTCTAGCACAAGCTATG-GT-----ATGTGTTGTATGTATGAGTATA

TATATATGTATGTGTGTGTGTGTGTGTATATATATATATATATATTATTTTAAT--------------------------

-----------------------------------------------------------------------CTTTTCCTT

CCTAACATT-----CATAATTTTAGAGATAG-GT----ATAATATGTACATACT-TTTCAATCTGCAAC----AATAAA-

--------GACAATGTGTTTAATTTC-----AG-CTAAACAATGCTCAACCAGAACAATATGAAGCTCCAGATAAAGACT

TTAT

>Microtus_ochrogaster

TGTATCAGCGTTGTGTAAACCTAGTGCAGAAGACTTTAGCACAAGCCATG-GT---------------------------

---------------------------ATATATATATATATATTTTTT--------------------------------

-----------------------------------------------------------------------CCTTTCTTT

CTGAGTATCAA--------TTTTAGAGATAG------------GTATACACACTTTTTCATTGTGCAAC----AGCAAA-

--------GACAGTGTGTTTAATTTC-----AG-CTAAACAATGCTCAACCAGAACAATATGAAGCTCCAGATAAAGATT

TTAT

>Nannospalax_galili

TGTATCAGCGCTGTGTAAACCTAGTACAGAAGACTCTTGCACAAGCCATG-GT---------------------------

---------------------------ATATATATTTCTGTCTTTTTTTTTTTTTTTCGGAGCTAAGGACTGAACCCAGG

GCCTTGCACTTGCTAGGCAAGCGCTCTACCACTAAGCTAAATCCCCAACCCCAGTATATATATTTTTAATTTCGTCCCTT

CCTGACACAAT--GTTTTTTTCTAAGGATAG-GC----ATAATGTGTACATGCTTTTTTAGTGTATGAA----AGCAAA-

--------AACAATGTGTTTAATTTC-----AG-CTAAACAATGCTCAACCAGAACAATATGAAGCTCCAGATAAGGATT

TCAT

>Jaculus_jaculus

TTTATCAGCGTTGTGTAAACCTAGTACAGAAGACTCTTGCACAAGCCATG-GT---------------------------

---------------------------ATTTTTTTTTTTAA---------------------------------------

-----------------------------------------------------------------------ACTCTTTTT

CATCCTAATAGAAACAACTTTCTGAAAATAG-AC-----TAACGTGAACATATTTTTTCAGTAATTGAT----AGCAAA-

----------AGTTTTGTTTAATTTC-----AG-CTGAACAATGCCCAGCCAGATCAGTATGAGGCTCCAGATAAAGACT

TCAT

>Castor_canadensis

TGTATCAGCGTTGTGTAAACCTAGTACAGAAGACTCTTGCACAAGCTATG-GT---------------------------

---------------------------ATTTTTTTAAATAT---------------------------------------

-----------------------------------------------------------------------CTTTCCCTT

------AACATAAATATTTTTCTGAACATAG------CACAACATGTACAAACTTTTTCAATAATTGACTAAAAGTAAA-

------ACTTGAACTTTTAAAATTTC-----AG-CTGAACAATGCTCAGCCAGATCAATATGAGGCTCCAGATAAAGATT

TTAT

>Cavia_porcellus

TGTATCAGCGTTGTGTAAACCTAGTACAGAAGACTCTTGCACAAGCCATG-GT---------------------------

--------------------------ATTTTATTTTAAAATAT-------------------------------------

-----------------------------------------------------------------------CTTTGCCTT

CCT-ACATCATACACAC--TTCTAAAGATAATGC----ATAATGTGTCCATACTCTTTGAGTAACCAATTAAAAGCAAA-

----------AATACTGTTTAATTTC-----AG-TTAAACAATGCTCAGCCAGATCAATATGAGGCTCCAGATAAAGATT

TTAT

>Homo_sapiens

TGTATCAGCGTTGTGTAAACCTAGTACAGAAGACTCTTGCACAAGCCATG-GT---------------------------

---------------------------AATTTTTTTAAAATGT-------------------------------------

-----------------------------------------------------------------------CTTCCTCTT

CTTGACATGGTGGACATTTTTCTAAAGATAG-GT----ATAATGTATACAGACTTTTTAAGTAGTTAATTAAAACCAAAC

TTACAAAAAACATTGTGTCTAATTTC-----AG-CTAAACAATGCTCAACCAGATCAATATGAAGCTCCAGATAAAGATT

TTAT

>Bos_taurus

TGTACCAGCGCTGCGTGAACCTAGTGCAGAAAACTCTTGCACAAGCCATG-GT---------------------------

---------------------ATTTAAACAAGTTTTTATAT---------------------------------------

-----------------------------------------------------------------------CTCTCCCTT

ATTGGCATCAGAAACATTTTTCTAAGGATAG-GC----ATAATGCATAAAAACTTTTTCAGTAATTGGTTTAAAGTAAG-

-TTTTCAAAAAATTGTGTGTAATTTC-----AG-CTGAACAATGCTCAACCGGATCAATATGAGGCTCCAGATAAAGATT

TTAT

>Loxodonta_africana

TGTATCAGCGTTGTGTTAACCTAGTACAGAAGACTCTTGCACAAGCCATG-GT---------------------------

-----ATTTTTACATATATATATGTATACCTATATATATATATATC----------------------------------

-----------------------------------------------------------------------TTTTTTCTT

TTTAGCATTATAAACATTTTTCTGGGGATAG-GC----ATAGTGTATAGAAACTTTTTTAGTAATTGACTTAAAGTATCC

TTTCA---AAAAATTTTTCTAATTTC-----AG-CTGAACAATGCTCAACCAGATCAGTATGAGGCTCCAGATAAAGATT

TTAT

**IL7**

>Mus_musculus

GACCTGTACATAGTAGCCGGCCGCCGCTATGGGCTGGTGGGACCCAACGG------------------------------

--------------------------------------------------------------------------------

-----------CAAAGGCAAAACCA-CGCTTCTGAAGCACATTGCCAACCGTGCCCTGAGCA

>Mus_spretus

GACCTGTACATAGTAGCCGGCCGCCGCTATGGGCTGGTGGGACCCAACGG------------------------------

--------------------------------------------------------------------------------

-----------CAAAGGCAAAACCA-CGCTTCTGAAGCACATTGCCAACCGTGCCCTGAGCA

>Rattus_norvegicus

GACCTGTACATCGTGGCTGGCCGCCGCTATGGGCTGGTGGGGCCCAACGG-GT-----AAGAAGAT--------------

-----------GGTACTGAGGGG--AAGGAAGCAGGATGTGATGGCTCTG-GGCGGCTGGGTTCTCATGGTTCTT-GTTC

TCC-----AG-CAAGGGCAAGACCA-CACTTCTGAAGCACATTGCCAACCGTGCCCTGAGTA

>Cricetulus_griseus

GACCTGTACATCGTCGCAGGCCGCCGCTACGGGCTGGTGGGACCCAATGG-GT-----AAGAAGAT--------------

-----------GGGACTGAAGGG--GAGCAGGAGGGTT------GCACTG-GGTGGCCAGGTCCTCATGGCCCTT-GTTC

TCC-----AG-CAAAGGCAAGACCA-CGCTCTTGAAGCACATTGCCAACCGCGCCCTGAGCA

>Microtus_ochrogaster

GACCTGTACATCGTCGCCGGCCGCCGCTACGGGCTGGTGGGGCCCAATGG-GT-----GAGAAGGT--------------

-----------GGGGCTGAAGGG----GAAAGGAGGAT------GCTCTG-GGTGGCTGGGTCCTCATGGTTCTT-GTTC

TCC-----AG-CAAAGGCAAGACCA-CACTCCTGAAACACATTGCCAACCGTGCCCTGAGCA

>Nannospalax_galili

GACCTATACATCGTAGCCGGCCGCCGCTACGGGCTGGTGGGGCCCAACGG-GT-----GAGGAGAT--------------

-----------GGGCAGGATGGG--AAAGAAGGATG--------GCCCTG-GGTGGCCAGGTCCTCACAGCTCTC--TTC

TCC-----AG-CAAGGGCAAGACCA-CACTTCTGAAGCACATTGCCATCCGTGCCCTGAGCA

>Jaculus_jaculus

GACCTGTACATCGTAGCTGGTCGCCGCTATGGGCTAGTCGGACCTAATGG-GT-----GAGGAGAT--------------

-----------GGAGTTGAAAGT--TCAGGAGGGATTT-------GTCTGTAGTGGCTGGATCCTCATAGCTCTT-GTTC

CGC-----AG-GAAGGGCAAGACCA-CACTCCTGAAGCACATTGCCAATCGTGCCCTGAGCA

>Dipodomys_ordii

GACCTGTACATTGTAGCTGGCCGGCGTTATGGGCTCGTGGGACCCAACGG-GT-----GAGGAGAT--------------

-----------GGGTCTGGAGGG--CAGAGAGGGGATT------TATCTATGGTGGGCAAGTCCTCATAACTCTT-GTTC

TTC-----AG-CAAAGGCAAGACCA-CACTCCTCAAGCACATTGCCAATCGTGCCCTGAGCA

>Cavia_porcellus

GACCTCTTCATCGTGGCCGGCCGCCGCTACGGGCTGGTGGGACCCAACGG-GT-----GAGGAAGT--------------

----------AGGGGCGGACAGGCTGCGGGAAGGGGCT------CCCCAG-GGCACCACGG--CTCACAGCTCTT--GTC

CCC-----AG-CAAGGGCAAGACCA-CGCTCCTCAAGCACATCGCCAACCGTGCCCTCAGCA

>Homo_sapiens

GACCTGTACATTGTAGCCGGCCGCCGCTACGGGCTGGTAGGACCCAATGG-GT-----GAGAAGAGGAGGGAGCTG----

GAGGCAAAAAAGGGCCTGGAGGG--AAAAGAAGAGATT------TCTCAGTGGTGGCCAGGTCCTAATAGCTTTT-ATTC

CCC-----AG-CAAGGGCAAGACCA-CACTCCTCAAGCACATTGCCAACCGAGCCCTGAGCA

>Bos_taurus

GACCTGTACATCGTCGCCGGCCGCCGCTACGGGCTGGTGGGACCCAATGG-GT-----GAGGAGAGGAGGGGCTGGAGCT

GTGAGAGAGGAGGGGCCAGAGGG--AGAAGAGACTTGT------TCTGGGAGGCGGCCTGGTCCTCAAAGCTCTC-ATTC

CCC-----AG-CAAGGGCAAGACCA-CTCTCCTCAAGCACATCGCCAACCGAGCCCTGAGCA

>Loxodonta_africana

NNNNNNNNNNNNNNNNNNNNNNNNNNNNNNNNNNNNNNNNNNNNNNNNNN-NN-----NNNNNNNNNNNNNNNNNNNNNN

NNNNNNNNNNNNNCACTGGAGGG--AAAAGAAGTGGCT------TCTCAG-GGTGGCCTGGTCCTAGTCACTCTTAATTC

CCC-----AG-CAAGGGCAAGACCACCGCTTCTCAAGCACATCGCCAACCGAGCCCTGAGCA

**IL8**

>Mus_musculus

CTGGATGTTCTGAAGGACGTGAACAAGGTCAGACTTCGGCCTGTGGAAAG------------------------------

--------------------------------------------------------------------------------

--------------------------------------------------------------------------------

--------------------------------------------------------------------------------

--------------------------------------------------------------------------------

--------------------------------------------------------------------------------

--------------------------------------------------------------------------------

--------------------------------------------------------------------------------

--------------------------------------------------------------------------------

--------------------------------------------------------------------------------

--------------------------------------------------------------------------------

--------------------------------------------------------------------------------

--------------------------------------------------------------------------------

--------------------------------------------------------------------------------

--------------------------------------------------------------------------------

--------------------------------------------------------------------------------

--------------------------------------------------------------------------------

--------------------------------------------------------------------------------

--------------------------------------------------------------------------------

--------------------------------------------------------------------------------

--------------------------------------------------------------------------------

--------------------------------------------------------------------------------

--------------------------------------------------------------------------------

--------------------------------------------------------------------------------

--------------------------------------------------------------------------------

--------------------------------------------------------------------------------

--------------------------------------------------------------------------------

--------------------------------------------------------------------------------

--------------------------------------------------------------------------------

--------------------------------------------------------------------------------

--------------------------------------------------------------------------------

--------------------------------------------------------------------------------

--------------------------------------------------------------------------------

--------------------------------------------------------------------------------

--------------------------------------------------------------------------------

--------------------------------------------------------------------------------

--------------------------------------------------------------------------------

--------------------------------------------------------------------------------

--------------------------------------------------------------------------------

--------------------------------------------------------------------------------

--------------------------------------------------------------------------------

--------------------------------------------------------------------------------

--------------------------------------------------------------------------------

--------------------------------------------------------------------------------

--------------------------------------------------------------------------------

--------------------------------------------------------------------------------

--------------------------------------------------------------------------------

--------------------------------------------------------------------------------

--------------------------------------------------------------------------------

--------------------------------------------------------------------------------

--------------------------------------------------------------------------------

--------------------------------------------------------------------------------

--------------------------------------------------------------------------------

--------------------------------------------------------------------------------

--------------------------------------------------------------------------------

--------------------------------------------------------------------------------

--------------------------------------------------------------------------------

--------------------------------------------------------------------------------

--------------------------------------------------------------------------------

--------------------------------------------------------------------------------

--------------------------------------------------------------------------------

--------------------------------------------------------------------------------

--------------------------------------------------------------------------------

--------------------------------------------------------------------------------

--------------------------------------------------------------------------------

--------------------------------------------------------------------------------

--------------------------------------------------------------------------------

--------------------------------------------------------------------------------

--------------------------------------------------------------------------------

--------------------------------------------------------------------------------

--------------------------------------------------------------------------------

--------------------------------------------------------------------------------

--------------------------------------------------------------------------------

--------------------------------------------------------------------------------

--------------------------------------------------------------------------------

--------------------------------------------------------------------------------

--------------------------------------------------------------------------------

--------------------------------------------------------------------------------

--------------------------------------------------------------------------------

--------------------------------------------------------------------------------

--------------------------------------------------------------------------------

---------------------------------------------GTCACCAGGTGGCAGACCCGTTCAGAAGAGGAAGA

GACG---GAGTTCAGAAT

>Mus_caroli

TTGGATGTTCTGAAGGATGTGAATAAGGTCAAACTTCGGCCCGTGGAAAG------------------------------

--------------------------------------------------------------------------------

--------------------------------------------------------------------------------

--------------------------------------------------------------------------------

--------------------------------------------------------------------------------

--------------------------------------------------------------------------------

--------------------------------------------------------------------------------

--------------------------------------------------------------------------------

--------------------------------------------------------------------------------

--------------------------------------------------------------------------------

--------------------------------------------------------------------------------

--------------------------------------------------------------------------------

--------------------------------------------------------------------------------

--------------------------------------------------------------------------------

--------------------------------------------------------------------------------

--------------------------------------------------------------------------------

--------------------------------------------------------------------------------

--------------------------------------------------------------------------------

--------------------------------------------------------------------------------

--------------------------------------------------------------------------------

--------------------------------------------------------------------------------

--------------------------------------------------------------------------------

--------------------------------------------------------------------------------

--------------------------------------------------------------------------------

--------------------------------------------------------------------------------

--------------------------------------------------------------------------------

--------------------------------------------------------------------------------

--------------------------------------------------------------------------------

--------------------------------------------------------------------------------

--------------------------------------------------------------------------------

--------------------------------------------------------------------------------

--------------------------------------------------------------------------------

--------------------------------------------------------------------------------

--------------------------------------------------------------------------------

--------------------------------------------------------------------------------

--------------------------------------------------------------------------------

--------------------------------------------------------------------------------

--------------------------------------------------------------------------------

--------------------------------------------------------------------------------

--------------------------------------------------------------------------------

--------------------------------------------------------------------------------

--------------------------------------------------------------------------------

--------------------------------------------------------------------------------

--------------------------------------------------------------------------------

--------------------------------------------------------------------------------

--------------------------------------------------------------------------------

--------------------------------------------------------------------------------

--------------------------------------------------------------------------------

--------------------------------------------------------------------------------

--------------------------------------------------------------------------------

--------------------------------------------------------------------------------

--------------------------------------------------------------------------------

--------------------------------------------------------------------------------

--------------------------------------------------------------------------------

--------------------------------------------------------------------------------

--------------------------------------------------------------------------------

--------------------------------------------------------------------------------

--------------------------------------------------------------------------------

--------------------------------------------------------------------------------

--------------------------------------------------------------------------------

--------------------------------------------------------------------------------

--------------------------------------------------------------------------------

--------------------------------------------------------------------------------

--------------------------------------------------------------------------------

--------------------------------------------------------------------------------

--------------------------------------------------------------------------------

--------------------------------------------------------------------------------

--------------------------------------------------------------------------------

--------------------------------------------------------------------------------

--------------------------------------------------------------------------------

--------------------------------------------------------------------------------

--------------------------------------------------------------------------------

--------------------------------------------------------------------------------

--------------------------------------------------------------------------------

--------------------------------------------------------------------------------

--------------------------------------------------------------------------------

--------------------------------------------------------------------------------

--------------------------------------------------------------------------------

--------------------------------------------------------------------------------

--------------------------------------------------------------------------------

--------------------------------------------------------------------------------

---------------------------------------------GTCACCAGGCGGCAGACCCGTTCAGAAGAGGAAGA

GACGACGGAGTTCAGAAT

>Rattus_norvegicus

TTGGATGTTCTGAAGGACATGAATAAGGTCAAACTTCGGCCAGTGGAAAG-GT-----ATGTCACTGGGATTTGGGAGAG

GGAAGGAAATTTTATCAGT----TTTTCAGATAAATG-----GTTCATGGGAGT--------------------------

-----------TGTGTATCTCTTACTCTCCCTTACCCTGTGGCCTCCTTCCCAGGGCAGAACCATCCTTAGTTCTTTCTT

TGAGTGTCTCTTGTCTTA---TCATA----------------------------CTTCACTGTT------------AATT

ATATGTACTCTGTGCTGTGGAGGAT-AAGAATA-----------------------------------------------

--------------------------------------------------------------------------------

------------------------------------CAGGAC--------------------------------------

--------------------------------------------------------------------------------

--------------------------------------------------------------------------------

--------------------------------------------------------------------------------

--------------------------------------------------------------------------------

--------------------------------------------------------------------------------

-------------------------------------------------------------TT----CCTTCT-------

---------ACCCAACATT----------------------------------------------TTGCT----------

--------------------------------------------------------------------------------

--------------------------------------------------------------------------------

--------------------------------------------------------------------------------

--------------------------------------------------------------------------------

--------------------------------------------------------------------------------

---------------TTT--------------------------------------------------------------

--------------------------------------------------------------------------------

--------------------------------------------------------------------------------

----------------------------------------CCTGAGGC--------------------------------

--------------------------------------------------------------------------------

--------------------------------------------------------------------------------

--------------------------------------------------------------------------------

---------------------------------TGGTTAGCATTTAA---------------------------------

--------------------------------------------------------------------------------

--------------------------------------------------------------------------------

--------------------------------------------------------------------------------

--------------------------------------------------------------------------------

--------------------------------------------------------------------------------

--------------------------------------------------------------------------------

----------------------------------------------------TGGAAAGTTCTAGAAGCGGT--------

------------------------------------------------------------------------------GT

GATTAAACATTGTAATTCAGTGACGATGGAC-------------------------------------------------

--------------------------------------------------------------------------------

----------------------------------------------------------------------GCAATGATCA

AATTAATGAACAAAAGCCGAATGATTTT----------------------------------------------------

--------------------------------------------------------------------TTTTCATCATGA

ATCTGGTCTTTTGTA-------------------------------------------------------------CATT

CTTAAAGATTTC--------------------------------------------------------------------

--------------------------------------------------------------------------------

--------TTTAAATC----------------------------------------------------------------

--------------------------------------------------------------------------------

-------CTCCTGT------------------------------------------------------------------

--------------------------------------------------------------------------------

--------------------------------------------------------------------------------

--------------------------------TCAATGTGCTGGACGTCACGGTAGACTCCCATATTCCCTGT-------

--------------------------------------------------------------------------------

--------------------------------------------------------------------------------

--------------------------------------------------------------------------------

--------------------------------------------------------------------------------

--------------------------------------------------------------------------------

--------------------------------------------------------------------------------

--------------------------------------------------------------------------------

--------------------------------------------------------------------------------

--------------------------------------------------------------------------------

--------------------------------------------------------------------------------

--------------------------------------------------------------------------------

--------------------------------------------------------------AGTTGGATAGCAGAAGCA

GGATC-------------------------------------------------AGAAGTTCAAGACC------------

--------------------------------------------------------------------------------

--------------------------------------------------------------------------------

--------------------------------------------------------------------------------

--------------------------------------------------------------------AGCCAGCTTGGT

TTACCT------------------------------------AGAGCATGCTA---------------------------

--------------------------------------------------------------------------------

--------------------------------------------------------------------------------

--------------------------------------------------------------------------------

-----------------------------------------------------------------------CAGTGGAAA

TTAGAAGGCTAAACATTGAAGT------------------------------------------------TTGGAGCGAT

GAAAATGAG----------------GAACTCAGGCCACACAGGTGTGGGAG--------------GCCCCAACCCGTGGC

TC-----------CTGGTTTTCTGATGTGAATTCTTAGTTTGC----TCGTTCTTTCTTTCTTCCTTTATTTAAGTATTT

ATTTAAATGTAGGAG-----TGCTCTGTCTGCACATACACCTATATCCCAGGAGAT-CAGATTCCTTTATAGATGGTCTT

GAGCCACCATGTGGTTGCTGGGAATTGAA-CTCAGGACCTCTGGAAGAGCAGCCAGAGTTCTTAACTGCTAAGCCATCTC

ACCAGCCCCTCTTTAGATTTCTTAATTCATGGCAGA-------AATCTCTTAAAAACTA---------------------

-----ATTAGATTATAATGTATT-----------------ATGCTTACATTCCTGCT-GTGTTTAGGAA-----------

------------------------------------------------------------------CTAAGAGCTAAAAA

AAAATTGCAT----------------------------------------------------------------------

-----------------------------------------------------------------------CAGAGTTTT

AATGCTTTTGAT--------TTTCTTGATTTACAAAT-----AG-GTCACCGGGTGGTAGACCCATTCAGAAGAGGAGAA

GACA---GAGTTCACAAT

>Cricetulus_griseus

TTAGACATTCTAAAGGACATGAATAAGGTCAAACTTCGTCCCATTGAAAG-GT-----ATGTCACCAGAATTTGGGGAAG

GAACTGAAATTTTATCCAT--TGTTTTCAGAGACATNNNNNNNNNNNNNNNNNN--------------------------

--------------------------------------NNNNNNNNNNNNNNTTTTTTTTTTTTTTTTTTTTTTTTTTTT

TTTTTTTTTTTTTTTTTT------------------------------------TTTTTTTTTTTTTTGGCATGTTAATT

ATACTTACTCCATGTTGTAAAGAATTAGGAATA-----------------------------------------------

--------------------------------------------------------------------------------

------------------------------------TAGTAG--------------------------------------

--------------------------------------------------------------------------------

--------------------------------------------------------------------------------

--------------------------------------------------------------------------------

--------------------------------------------------------------------------------

--------------------------------------------------------------------------------

-------------------------------------------------------------TT----CCTTCT-------

---------ACCCAGCATT----------------------------------------------TTGCT----------

--------------------------------------------------------------------------------

--------------------------------------------------------------------------------

--------------------------------------------------------------------------------

--------------------------------------------------------------------------------

--------------------------------------------------------------------------------

---------------TTC--------------------------------------------------------------

--------------------------------------------------------------------------------

--------------------------------------------------------------------------------

----------------------------------------TCTGAGAT--------------------------------

--------------------------------------------------------------------------------

--------------------------------------------------------------------------------

--------------------------------------------------------------------------------

---------------------------------TGGTTACCCCTCAA---------------------------------

--------------------------------------------------------------------------------

--------------------------------------------------------------------------------

--------------------------------------------------------------------------------

--------------------------------------------------------------------------------

--------------------------------------------------------------------------------

--------------------------------------------------------------------------------

----------------------------------------------------TGGAAAGTTCTAAAAGTAGC--------

-----------------------------------------------------------------------------ATG

ATTAAATAGTTGTAATTTAATGAAGACTGAC-------------------------------------------------

--------------------------------------------------------------------------------

--------------------------------------------------------------------TGACTGTGATCA

AATTAATGAACAGCTAGCCAAATGGTGT----------------------------------------------------

------------------------------------------------------------------TTTTGTAAAATCTA

ATCTAGTCCTTTCAAA------------------------------------------------------------CATT

CTTAAAGATTTC--------------------------------------------------------------------

-------------------------------------------TTTCTTTCTTTTTCTTTTGTTGAGACAGGGTTTCTCT

TGGCTATCCTGGAACC----------------------------------------------------------------

--------------------------------------------------------------------------------

-------CTCTTTTTAGACAAGGCTTGCTT----------------------------CAAACTCAAAGTGATCTGCCTG

TGTCTGCCT-----------------------------------------------------------------------

--------------------------------------------------------------------------------

--------------------------------CTTGAGTGCTGGGATTAAAGGTGTACATTACCATGCCTGGCTCTTAAA

GATTTCTTTAAATTCTATTT------------------------------------------------------------

--------------------------------------------------------------------------------

--------------------------------------------------------------------------------

--------------------------------------------------------------------------------

--------------------------------------------------------------------------------

--------------------------------------------------------------------------------

--------------------------------------------------------------------------------

--------------------------------------------------------------------------------

--------------------------------------------------------------------------------

--------------------------------------------------------------------------------

--------------------------------------------------------------------------------

--------------------------------------------------------------------------------

------------------------------------------------------AGTGGTGCTGGACATCAC--------

--------------------------------------------------------------------------------

--------------------------------------------------------------------------------

--------------------------------------------------------------------------------

--------------------------------------------------------------------------------

------------------------------------------GGAGCATACCT---------------------------

--------------------------------------------------------------------------------

--------------------------------------------------------------------------------

--------------------------------------------------------------------------------

-----------------------------------------------------------------------------GTA

GT-----------CCCTGATGG------------------------------------------------CAGAAGCA--

-------------------------GAAT----CACAAATTCAAGGCCATCTAGCCT--------GGTCTGCCTAGTGAA

TT-----------CTGCAG---------------------------------------------TGGGAAATTAGAA---

----GGTTAAAG---------ATTAAGGTTGTTGTAGCAGTGAAAATGAGGGACCT-CAGGTC-----------------

--GTGAC-AGGTTGTGGGAGGCACCAAC--TATTTGGTTTCT------------TAGTTTTCTGATTTTGAATTCTTAGT

ACT-------TTTTAGATTCCTTAATTCATTGCAGA-------AATCTCCTAAAGACTA---------------------

-----ATTAGATTATATT----------------------ATGCTCCTTTCCCTGCT-GTGTTTGTGAA-----------

------------------------------------------------------------------CAAAGAG---CT--

AAAATTGCAT----------------------------------------------------------------------

-----------------------------------------------------------------------CGAAGTTTT

AATGTATTTGAT----------TTTTCTTTTAAAAAT-----AG-GTCACCAGGTGGTAGACCCATTCAGAAGCAGAAAA

GACA---GAGTTCACAAT

>Nannospalax_galili

TTGGATGTTCTGAAGGACATGAATAAGGTCAAGCTTCGTGCTGTTGAAAG-GT-----ATGCTGTCAGAATTTGGGAAGC

AAGCCAAAATTCTATCAATATTGGTTTCAAAGAAATTAT---GTTGATGAAATT--------------------------

-TGGCATTTATATCTTACTTATTATTGCTTACCACCTATGAATAC-CTTCTCAGAG-ACAATCACTTTGAATTCTTT-CT

TGGCTGTTTCTTCTATTG---TCTTATAC-------------------------TTTTGCTATTTT-TGATATGTTAATT

AAACTTACTCTCTGCTGTATAGGATTAGGAATA-----------------------------------------------

--------------------------------------------------------------------------------

------------------------------------TAGGAG--------------------------------------

--------------------------------------------------------------------------------

--------------------------------------------------------------------------------

--------------------------------------------------------------------------------

--------------------------------------------------------------------------------

--------------------------------------------------------------------------------

-------------------------------------------------------------TT----CCTTCT-------

--------TATCTACCATT----------------------------------------------TTACT----------

--------------------------------------------------------------------------------

--------------------------------------------------------------------------------

--------------------------------------------------------------------------------

--------------------------------------------------------------------------------

--------------------------------------------------------------------------------

---------------TTTTGT-----------------------------------------------------------

-----------------------------------------------AAGATCA--------------------------

--------------------------------------------------------------------------------

----------------------------------------GCTACAGT--------------------------------

--------------------------------------------------------------------------------

--------------------------------------------------------------------------------

--------------------------------------------------------------------------------

---------------------------------CTGAAAATAGTCAA---------------------------------

--------------------------------------------------------------------------------

--------------------------------------------------------------------------------

--------------------------------------------------------------------------------

--------------------------------------------------------------------------------

--------------------------------------------------------------------------------

--------------------------------------------------------------------------------

----------------------------------------------------TAGAAAGTTCCAGAAATAATTCCCAAGG

TTTAAACTGTGCTGTTTTGAGTAGC----------------------------------------------------ATG

ATGAAATAGCAGTAATTCAATGAAGACTAAA-------------------------------------------------

--------------------------------------------------------------------------------

--------------------------------------------------------------------------TGAATG

AATGACCAAATTAATGAGCACTTAGCCT----------------------------------------------------

-----------------------------------------------------------AATGCATGGTATTCTCATGCA

ATCTGGTTTTTCAAAG-------------------------------------------------------------GTT

CTCAAATATTTC--------------------------------------------------------------------

-------------------------------------------TTTATATTTTCCTACCCAGT-----------------

--------------------------------------------------------------------------------

------------------------------------------------------------------GGTGCAGGATGTGG

TGATGCTCTCCTGCAAAGGCAGGATTGTTG----------------------------CAGGTTTGAGGCCAGCTTGGTG

TTCCTAGTCAATTCCAGGCTACAGACCCTGTCTCCAAAAAAAAAAAGAAAATCTTACCCTGT------------------

--------------------------------------------------------------------------------

--------------------------------ACAAAATTAGAAGATTAAAAACATGGTGTTGCACGCCT----------

------TTAATCCCAGCACTTGGGAGGCAGAGGCAGGTGGCTCTTTGT--------------------------------

--------------------------------------------------------------------------------

--------------------------------------------------------------------------------

--------------------------------------------------------------------------------

--------------------------------------------------------------------------------

--------------------------------------------------------------------------------

----------------------------------------------------GAGTTCGAGGCCAGCCTGGTCTACGTTG

TGAGTTCCAG----------------------------------------------------------------------

-------------------------------------------------------------GACAGCTGGGGCTACAAGG

AGACCCTGTCTCAAAAAGACAAAAAATAAAATAAAAATAAGGCTTTTAG-------------------------------

--------------------------------------------------------------------------------

--------------------CACAGTGAT---------------------------------AGTGAGTAATCCCAGGTT

ATAGCAAGGTTTTGGGACGCTCCAACCCCTACACTCCGTTGGGGGCGAGCGGGGATAGGGGCAGGATAT-----------

-----------------------------------------------------ACACATCTACCTTTTCCTACCTTGGTT

CCAA--------------------------------------------------GGAAAAACTGAGATGGGATTCCACCA

AAATACACTGA--------------------------------------GAAATCATTGAGTTTATTGGTCTTACTTAAA

GAGCAATGGCTGAGGGTTTACTT----------------------------------------ACAGGAGTGTGGGTGCT

TCCCCCTCTTAAG-----------------------------GCAGCACCAGA---------------------------

--------------------------------------------------------------------------------

--------------------------------------------------------------------------------

--------------------------------------------------------------------------------

----------------------------------------GTCTTCACTCAAGCAGGGAAGATGGATTTCCCAAGTGGCA

TA-----------AAATGGGGAGAGCCCCTCCCTTGGTCTT-----------------------------CCTCAGTGTA

TATACTCTA----------------GCCCTTCCTCCAGGC-CATGGGCGATTAGGGCAGA-----ATTGCTCATCATGGG

TTGAGAGGTATAGCTGGACTCCTAGGTGAGGGTCCT-----------GTGACTCTCCCATCCCCTCCTATGCTGGGGCTC

CAGCAGTTATCAAAACCAGCTATGATGATTTTAGGCAAATGGGTG------------CAGCTG-----------------

--AGGTTAAGAAGATGGCATTTGTCTGTGGGAGGACAGTCCTTATAGAACACTATGGTTTCTTGGTTTTTA-----CAGG

GCT-------CTCTAGATTTCTCAATTCAATATTAA--------------------------------------------

--------AGATTATAATATATT-----------------GTGCTTGTAATCCTGTTAATCTTTGTAAA-----------

------------------------------------------------------------------CACAGGAAATCT--

AAAATTGTAT----------------------------------------------------------------------

-------------------------------------------------------------------------CACTTTT

AATGTATTCAATCCCCTGACTGTTTTTTTTTTTAAAT-----AG-GTCACCGGGTGGTAGACCCATTCACATGAGGAAAA

GACA---GAGTTCACATT

>Dipodomys_ordii

TTGGATGTTCTAAAGGACATGGATAAGGTGAAGCTTCGTGCTGTTGAACG-GT-----AAGTTAT---AATCAGGGAAAG

GTGCTGAAATGCTGTCAACAATGCTTTTAAGGAAATCAT---GTCGATG-------------------------------

--------TTTTTCTCATTTCTTACTCCTTATCACTTCTGATTGCTCCTCACTGAA------------ATACTCCTT-TT

TGACTATTTTTTCTATGG---CCTTATAATTCTG--------------------GGTTTTTTTTTTTTAATACCTTACT-

--------------ATGTAGAGTATCAGGAATA-----------------------------------------------

--------------------------------------------------------------------------------

------------------------------------TAGTAGGG------------------------------------

--------------------------------------------------------------------------------

--------------------------------------------------------------------------------

--------------------------------------------------------------------------------

--------------------------------------------------------------------------------

--------------------------------------------------------------------------------

-------------------------------------------------------------------CCCCTT-------

---------ATCTACTGTT----------------------------------------------TTCCTTTCCATTGT-

--------------------------------------------------------------------------------

--------------------------------------------------------------------------------

--------------------------------------------------------------------------------

--------------------------------------------------------------------------------

--------------------------------------------------------------------------------

---------------TTCAGTCACCCATG---------------------------------------------------

--------------------------------------------------GTCA--------------------------

--------------------------------------------------------------------------------

----------------------------------------ATTATGGT--------------------------------

--------------------------------------------------------------------------------

--------------------------------------------------------------------------------

--------------------------------------------------------------------------------

---------------------------------CTGAAACTCTTAAA---------------------------------

--------------------------------------------------------------------------------

--------------------------------------------------------------------------------

--------------------------------------------------------------------------------

--------------------------------------------------------------------------------

--------------------------------------------------------------------------------

--------------------------------------------------------------------------------

----------------------------------------------------TGGGAAATTCCAGAAAT-----------

--------------------------------------------------------------------------------

--------------------------------------------------------------------------------

--------------------------------------------------------------------------------

--------------------------------------------------------------------------------

--------------------------------------------------------------------------------

--------------------------------------------------------------------------------

--------------------------------------------------------------------------------

---AAATAATTC--------------------------------------------------------------------

--------------------------------------------------------------------------------

--------------------------------------------------------------------------------

--------------------------------------------------------------------------------

--------------------------------------------------------------------------------

--------------------------------------------------------------------------------

--------------------------------------------------------------------------------

--------------------------------------------------------------------------------

--------------------------------------------------------------------------------

--------------------------------------------------------------------------------

--------------------------------------------------------------------------------

--------------------------------------------------------------------------------

--------------------------------------------------------------------------------

--------------------------------------------------------------------------------

--------------------------------------------------------------------------------

--------------------------------------------------------------------------------

--------------------------------------------------------------------------------

--------------------------------------------------------------------------------

--------------------------------------------------------------------------------

--------------------------------------------------------------------------------

------------------------------------------------------ATCAGTTTTAAACTGTATGCT-----

--------------------------------------------------------------------------------

--------------------------------------------------------------------------------

--------------------------------------------------------------------------------

--------------------------------------------------------------------------------

-------CTTTTGA----------------------------GTAGCGTCCTG---------------------------

--------------------------------------------------------------------------------

--------------------------------------------------------------------------------

--------------------------------------------------------------------------------

--------------------------------------------------------------------CGATAGTAGGTA

TT-----------CAGTGAGAA------------------------------------------------CT--------

-------------------------GAAT---GAACAAACCCATGAGTGGTTAGCCAAAACA---TTTTCATGAAAAAAA

TT----------------------GAAAAAGTTCTTAAATATT----TAAACTTTTCCTCCCACTGGGAAATTAAAA---

----AATTAAA----------GTTAAGCTTTTCAGGACAGTGATAGTAAAGAATGC-CAGGCT-----------------

--GCAGCAAGGTTGTGGTACAGTCTTAACACACGTGGATTCTT-----------AGTTTTTCTGATTCTCAATTCATACT

TTC-------CTTCAGAGTTCTTATTTTATGACACC-------AAGTTCTTGAAGACTA---------------------

-----ATTAGGTTATAAT------------------TACAATGCTTATTTTCCTAAT-GTGATTGTCGA-----------

------------------------------------------------------------------CAAGAAG---CT--

AAAA----------------------------------------------------------------------------

--------------------------------------------------------------------------AAATTT

AAATTAGTCAAT------------GTTTTTAAAAACC-----AG-GTCACCAGGTGGTAGGCCCATTCATAAGAAGCAAA

GACG---AAGTTCCCAGT

>Cavia_porcellus

TTAGATGTTCTGAAGGATCTGAATAAAGTCAAACTGCGTGCTGTTGAGCG-GT-----ATGTTGTCAT-ATTTGAGAAAT

AAACTGAAATTTTGTGAATGATGTTTTTTTAAAAA--ATTATGTTTAGGAAAGC--------------------------

-TGACAAAGATATTTTCTTTCTTATTACTTCTCACTCCTAAACATCCTTCCCAGAGATAAATCACTCT--GTTCCTT--T

TGGCTATTTTTTCTGTTG---TTATATTTCCATGATTTTGAAAC----------ATGTCTTATTTT------------TT

ATATTT-CTCCCCATTGTAGAATATTGGAAATA-----------------------------------------------

--------------------------------------------------------------------------------

------------------------------------CTGTAG--------------------------------------

--------------------------------------------------------------------------------

--------------------------------------------------------------------------------

--------------------------------------------------------------------------------

--------------------------------------------------------------------------------

--------------------------------------------------------------------------------

-------------------------------------------------------------TT----CCCTTT-------

---------ATCTGCCATT----------------------------------------------TTATTAACTGTGGT-

--------------------------------------------------------------------------------

--------------------------------------------------------------------------------

--------------------------------------------------------------------------------

--------------------------------------------------------------------------------

--------------------------------------------------------------------------------

---------------TTTAGTTCTTAATG---------------------------------------------------

--------------------------------------------------GTCA--------------------------

--------------------------------------------------------------------------------

----------------------------------------ACTGTAGT--------------------------------

--------------------------------------------------------------------------------

--------------------------------------------------------------------------------

--------------------------------------------------------------------------------

---------------------------------CTAAAAATATTAAA---------------------------------

--------------------------------------------------------------------------------

--------------------------------------------------------------------------------

--------------------------------------------------------------------------------

--------------------------------------------------------------------------------

--------------------------------------------------------------------------------

--------------------------------------------------------------------------------

----------------------------------------------------TAGAA-TTTCCAGAAATAATTT------

--------------------------------------------------------------------------------

--------------------------------------------------------------------------------

--------------------------------------------------------------------------------

--------------------------------------------------------------------------------

--------------------------------------------------------------------------------

--------------------------------------------------------------------------------

--------------------------------------------------------------------------------

--------------------------------------------------------------------------------

--------------------------------------------------------------------------------

--------------------------------------------------------------------------------

--------------------------------------------------------------------------------

--------------------------------------------------------------------------------

--------------------------------------------------------------------------------

--------------------------------------------------------------------------------

--------------------------------------------------------------------------------

--------------------------------------------------------------------------------

--------------------------------------------------------------------------------

--------------------------------------------------------------------------------

--------------------------------------------------------------------------------

--------------------------------------------------------------------------------

--------------------------------------------------------------------------------

--------------------------------------------------------------------------------

--------------------------------------------------------------------------------

--------------------------------------------------------------------------------

--------------------------------------------------------------------------------

--------------------------------------------------------------------------------

--------------------------------------------------------------------------------

------------------------------------------------------ATAAGTTTTAAATTGCTTGCTG----

--------------------------------------------------------------------------------

--------------------------------------------------------------------------------

--------------------------------------------------------------------------------

--------------------------------------------------------------------------------

--------TTTTGA----------------------------GGAGTGTCATG---------------------------

--------------------------------------------------------------------------------

--------------------------------------------------------------------------------

--------------------------------------------------------------------------------

------------------------------------------------------------------------AATAAGCA

TT-----------CAATGAAGA------------------------------------------------TC-AAATGA-

-------AT----------------GAGT---GGTTGAATAAACAAATAGTAGTCATGTGT----TTTTCTTCTCATGAT

CT--------------CTGTTCTATTGGATATTCTT-----------TAAA--TTTCTACCCCCTGGAAAATTAGAA---

----AATTAAAA---------ATATGGCCTTTTGGCAGAACAGTGTTCGAGAATTCTCAAATA-----------------

--AGAGTAAGATTCTGGT--------------------TTCTT-------------GGTTTCTGTTTCTAAAATC-TTGT

GCC-------TGTCAGACACCTTATTACATGGCAGA-------AATCTCCTGACGATTA---------------------

-----CCTATATT---------------------------ACGCTTAT----------GTGCTTGTTGA-----------

------------------------------------------------------------------CAAGGTG---CT--

AAGGTTACAT----------------------------------------------------------------------

-----------------------------------------------------------------------CAGAATTTT

AATTCCTTT---------------TTTTTTTAAAAAC-----AG-ATCACCTGGTGGTAGGCCCATTCATAAGAGGAAAA

GACA---GAGTTCACATT

>Homo_sapiens

TTGGACGTTCTAAAGGATATGAATAAGGTTAAGCTTCGTGCAATTGAGCG-GT-----ATGTTGTTGTAATTTGAAAAGT

GAACTGAAATTTTGTCAATTTTATGTTTAGAAAAATTATTATGTTTATGAAAAT--------------------------

-TAACATATATGTCTTTTTTCTTATTCTTCTTCACCCCTGAATACCTCTCCTAGAG-ATAATGACATTCAATTATTT--T

TGACTATTTCTTCTTCTAGTCTCTTATCACCATATTTTTGAAACAACATACTT-ATTTGCTATTTCTTGATATTTTAATT

ATGTTGACTTCCAATTGTAGGATATTAGGAATATATTTTCTTAGATACTCTA---CCCAGGACACACACACACATCTTGC

CACGTCTTCCTGAAATAGTTAAACCACAATCTTTAGTTAAATGAGTATTCAGAATTAATATCCTTATTATAACAGTGAAC

ATCCACAGTAAGCCATTTCTCATATTGTAACCCAGGCTGTAGGGCAGTGTTGAAATTACAGCTCACTGCAGCCTCGACCT

CCTGGGCTCAAGTGATCCTCCCACCTCAGCTTCCTTAGTAGCTGGGACTATAGGCATGTGCCACCATGCCTGGCTAATTT

TTGTATTTTTTTGTAGAGATGGGGTTTCGCCATGTTGCCCAGGCTGGTCTCTAACTCCTGAGCTCAAGCGATCTGCCCAT

GTTGGCCTCCCAAAGCGCTGGGATTACAGGTGTGAGCCACTGTGCCTGGCCCCATTTCATATATTTTGACTACATTTTAT

TTGTTGAATAATTTTTTTAGAGTTAATAATTGCCTCTCTGAGTTCCATGTGTGTGTGTGTGTGTGTGTGTGTGTGTGGTG

AAAAAACATAATGAGCTCTATTCTGTTAACAAATTTTTATGTGTATAATACAGTATCGTTAAGCACAATGTTGTACAACA

GATCTCTAGAGCTTTTTCATCTTGCATAACTGAAATTTTATACTCACTGAACAGTAATCATTT----CCCTCTCCCCTCA

TCCCCTGGCAACTGCCATTCTTCTTTCTACTTCTATAGTTTGATTACTTTATTTTTTATTTTATCTTATTAAAAAAAATA

GAGACAGGATTTCACTGTGTTGCCCAGGCTGGTCTTGAACTCGGCTCAAGTGATCCTCCTGCCTCGGTCTCTCAAAGTAC

TGGGATTACAGGCAAGAGCCACTGTGTCTGGCCCAGTTTGATTACTTTAGATGCCTCATATAAGTGAATCATGCAGCATT

TATCTTTTTGTGACTGGCTTATTTCACTTAGCATGCTGTATATTGTATGTATATATCCCATTTCTTAATCCATTCATCTG

TTGATAGACATTTAGTTTGCTTCCATGTCTTGTCTATTGTAAATAGCACTGCAATGAATGTGGGTGTGCAGATATCTCTT

TGAGATGCTGATTTCACTTCTTTTGGATAAGTACCCAGAAGTGGGATTGCTGGATCATAGGGTAGTTCTATTTCTAATTT

TTGGATGACCCTCCATTTAGTTCTTGGTGATTCTCCTCAAGGATCCCTCTGTGCCTGAAGGATTTCCTTCGCTTACCTCT

TGAGCATTCTTGCCCCCTTTTTTCTATGCTGCATCACTGATTTCCTAAATGTCATATCTTCCTATAGCTTCCTGAGAAAC

ATAAAGGGTAGATTAGTTTACTACTTTGCATGTCCAAAAATGTTCTTTTATTCTTTTTTTTTTTTAGATGGAGTCTGGCT

CTGTCGCCCGGGCTGGAGTGCAGTGGCATGATCTTGGCTCACTGCAGCTTCTGCCTCCTGGGTCTTGGTTCAAGCAATTC

TTTTGCTGCAGCCTCCCGAGTAGCTGGGATTACAGGCACGTGCCACCATGCCCAGCTAATTTTTGTAGTTTTAGTAGAGA

CAGGGTTTCACCATGTTGGCCAGGCTGGTCATGAACTCCTGACCTTGTGATCTGCCGGCCTCGGCCTCCCAAAGTGCTGG

GATTACAGGTGTGAGCCACCACACCTGGCCCACATTTTTAATTTTTAAGAGCTGTTTCTTTTTCTTCAAATGCTTCTTGT

TAAAATCTTTTTGGTTTTGTTGGTCTTATCCCACTGACAGTATTAAAAGTGTAGGTTTGTTTTAAGTTTCCTCTGTTCTT

GAATTACTGTATTTTTTGTGAGTTTCTTTTTTCCTTTTAGCTTTGATCTCTATCTTTAGTTTTGTAGCCTTGGGTAAGCA

TCTGGTGATTCTTATTTAAAATGAGGCAAGGAAAAGCTGATCGCATGTTCTTTGTGTGAGGTGGGCTTATCAACTTGGGA

GCTTCACAGTTTAGTGATTAGGGAGAGGACCATTTTGTTGGCCACACCCCAGAGCTGTATGTCTTTTCTTTTGGGCTACA

GGATTTTCCTTAGAAAGTTCTTCATTCTCCCTTGTGGTCAGGAGGGATGGGGATTACACAGCGGGTGCAAGTCAGGTCAT

TGGAGAGCTGAGTGGGGAAAGAGGAGCAAGAGAGAAGTGTCTTATTTAGCACACGCCCTGTGTTCAGCAGGGCGCCCACG

CCCCATGCTCTCACTTTCATCAGCTTTCCAGCTTCCGGCATCTGGTTGCAATTCTTATCTCCTGTCTCCCCTTCTAATCT

CTTTGTCCTTGTGGATATATAGATCTTTTTCATTTCTTTACTGTCATTTTAGTAGGA--TTTCACAAGGGATTTGCCATG

CTTACTTGGAAATCCCTCAGTGAGGTTTTCGGTGAGAAAATAGATATATTTTCTGTATGATAGTCCTGGGACAGATAAGT

CAGTTCTGTTTTTAATGAGGTTGTGAGTTTGATCCTTGCAACGATGCAGAAGGGCTCATTTTAAGTGAAATCCTTGTGAA

GAGGAAAGAGAAGGGAAACCAGTAACCACAGGAAGAGCATGAGGCAGCTTGTTGAGAAGAATCTCATGGCTGTAGGTGCA

TGCTTGGTCCCAACTAGATCTTGTACTTGTGTTGTCGGGCTTAGTATCAAGTGGCAACTCTGTGACTGTTACCATCACTG

GAAAAACAACTAAAAGGCCA-GTAGCCTCTGCCTCCTGTCCCCCTATTCTCTCCTGAGTTGCCTCTACAGCTAACTTTGT

TTTGTACGTTGCTGAGGAATCAGATGAGCTCTCTCACCTCTTTACACCTACAGATTCCCCGTGCAGATTCTCTGCCTTCC

ATCTTGCTGTTGGGAGCCAAGTGTCATCATTCATGGCCAGGCTCTTCCTTTGGTTACTGGTTTCCCTTCTCTTTCCTCTT

CACAAGGATTTCACTTAAAATGAGCCCTTCTGCATCACTGAGTCTTCCTTCTATACTTCA-TC--CTTCTCCTCACACCT

GAGTACTTCCCACCTTCAAAACACATGTACTCTCAGCCGTTGTTCTGTTGTTCTGCTCCCCTTTCTGATATGAATTCTTG

AAGTCGTCTATAATTTGTTTCTGTCTATCGCTGCTGCCTTCTACCCATGAAAACTCCATTGAAAACTGCTTCACCAGTGA

CTCCATGTGGCTAAATCCACTGGTCTCTTAGCATTGCTCGTCTTAGTTGACCTCTTGGCAGCATTTGATACAGCCTATGG

TCCCCACCTCCTTGGAGCACTTTCTTTTTTTTTTTGAGACGGAGTCTCGCTCTGTTGCCAGGCTGGAGTGCAGTGGCGTG

ATCTCGGCTCACTGCAACCTCTGCCTCCTGGATTCAAGTGATTCTCCTGCCTCGGCCTCCCGAGTAGCTGGGACTACAGG

CATGTGCCACCATGCTCAGCTAATTTTTGTATTTTTAGTAGAGATAGGGTTTCACCGTATTGGCCAGGATGGTCTCGATC

TCTTGACCGCATGATCCGACCACCTTGGCCTCCCAAAGTGCTGGGATTACAGGCATGAGCCACTGCGCCTAGCCTGGAGC

ACTTTCTTTACTTGGTTTCTGGGAAAGCATACCCCCAGGTTTCCTCTGACCTCATCAGCTATTCCTTCTTATTCCTTAAA

CTCTTCCCCCTGGGCCTGGTCTTTAAATGTTGAAATACCTGGTTCAGACCTCAG--CCCCCTCTCTTCTCTGTCCATGCT

GTTTCCTTTGGTGAGCTCACCTAGTCCTATGACTCTAAATACCAGCTGTATGCTTATGACTCAAACGTTTATTTTTCTAG

CCCTGACCTCTCCTCTTGAGCCCAGATGCACATACTGAAATGCCTACTTGACATCTTTATTTGCCTGTCTCACAGGTATC

TCGTTTCACAGGTCCAAAACAGGACTTTTCCTTCCTACCTGTTCTTTTCCGCCACCTTGAAAACCTGTTCTTTCCCACGT

CTTTTGCATATTAGCAAATGGCAACACGATCACCCGGTTGCTTAAGATCTAGGAATCAGGCCAGGTGCGGTGGCTCACAC

CAGTAAACACAGCACTTTGAGAGGCTGAGGTGGGCAGATCACTCGAGGTCAGGAGTTCGAGACCAGCCTGGCCAACATGG

TGAAACCCAGTCTCTACTAAAAATACAAAAATTACCCTGACATGATGGCGCACACCTGTAATCCCAGCTACTAGGAGGCT

GAGGCAGGAGAATTAATTGTTTGAGCCCGGGAGGCGGAGGTTGCAGTGAGCCACTATACTCCAGCCTTGGTGACAAAGCG

AGACTCCGTCTCAAAAAAACAAAAACAAATATCTAGGAATCATCCTTCATCTTTATTTTCCATTCTATCTCCCACCGTTC

CCATCAGCACATAGCTCAATTCTGTGGACCTCTTGACCTCCACTGCCAACTCCCCAGGCTAAGCCCATTCTTATCTAGCT

TAGACTTCCGCAGCAGCCTCCTCAGTGATCTGTTTTCATTCTTGCCTCCTTATTTATTCTGCAGATAGTGACCAGAAGTC

AGATCAGGCCATTCTCCTGCTTCAGACTCTTCTGTGGGTTTCCGTTGTGCTTGAATCAGTTCTAGAGCCCTTGCTGTGTC

C-GTAGGCCCCTCCAGGAGCCAGCCCTCACTTCTCTCGCTGAGCTCCTCTC--CTATGCCCCATGTTTGCCCACTGCACT

CCAGCTGCAGTTGCTTTCTTTTTTCCGTTTCTCACACATGCCAAGCT-CCTTCCTGATGCAGCCCCAGATGTTTACACTA

AAACTGACCCCTTGTCATTTT-----CTTAAAGAGGATGTTGCTTCCTTAAAGAGGCTTTTTTTCT-GATCATATCTAAA

GTGCTTCTGTCCCTAATCACTATTACATTTCCCTATTTTTTATTTTTT-------------------AATTTAGTTTTTT

TTTTTTTTTTTTGAGACAGGGTGTTGCTCTGTCACCCAGGCTGGAGTGTAGTGGTGCCATGACTTGCTGCAGGCTTGACC

TCCTTGGCTCAAGTGATCCTCCTGCCTTAACCTCCCAAGTAGTTGCCTGGCTAATTTTTAAATTTTTTCTAGAGATGGGG

TCTCGCTATGTTACCCAAGCTGCTCTCGAACTCCTGGGCTCAGGCAGTCCTCCCACCTTGGCCTCCTAAAGTGCTGGGAT

TATAGGCATGAGCTACCGTGCCCAGCCTCTGTTTTGTTTTATTCACAGCTCTTATTACCAGCCAAATGATCTTACTTGTA

TATTGATGATAATCTTGCTGTAAGAATTGGGAGCAGAATACTCCCAAAGCATAAAATGGAGTCGGATGTGGTAGTGGGCA

TT-----------CAATGAAGA------------------------------------------------TT-AAATGA-

-------AT----------------GAAC---AACCAAACAAATGAACAATTTGCGTAATTTTTTTTTTTTTGGCATGAA

CT-----------C--TCGTCCTTTTAAAAGTTCTTATTTATT----TGAATTTTCCTACCCATTAGGAAATTAGAA---

----AATTACCATA-------ATAAAGATCTTCAGCATAGTGACATCTGACAAATCTCAGGTC-----------------

--ATAACAAGGTTATGGCAGAGTCTCAAGTCACATGGGTTCT------------TGGTTTTCTGATTCTTCATTCATTGT

GCC-------TT-------CCTTATTTCATTGCGAA-------AATTTCTTGAAGATTAGATTATTTTCAATCTCTTGAA

GACTAATTAAATTGTA---AGAT-----------------ATGCTTGTATTCCTGCC-ATGTTTGTCAA-----------

------------------------------------------------------------------CAAGGAG---CT--

AAAATTACAT----------------------------------------------------------------------

-----------------------------------------------------------------------CCAAGTTTT

AATAAATTCAAT--------TTTTTTTTTTAAAAAAT-----AG-GTCACCTGGCGGTAGACCCATTCATAAGAGGAAAA

GACA---GAATTCACATT

>Bos_taurus

TTGGATGTTCTAAAGGATATGAATAAGGTTAAACTACGTGCTATTGAAAG-GT-----ATGTTGTCATAATTTGCAAAAT

GAACCAAAATTTTATCAGTGGTG--TTTAAAGAAATTATTTTATCAAAGTAAAC--------------------------

---ATATATAAGTCTTCTCTTTGATTCTTCTTCACCCC-AAACACGGCTCCTAGAG-AGAATCATTTTCAAATTTTT---

---GTGACTCTTCTAGTG---TCTTATCTTCATATTTTTGAAACATTGTAC---TTTTGCTATTTTTTGATATTTTAGTT

ATATTTACT-GGAATTGTTAAAAATCTGAAATACATTCTCTTAGACATTCTACCTCCTAACACACATGCACACATACACT

TCTTATTACATCTTCCAATATGGTTAAGTCACAGTCTTAAATACATGTTCAGAATTTATATCCTTATTATAATAATAAAC

ATTCA-------------------------------CAGGAA--------------------------------------

--------------------------------------------------------------------------------

--------------------------------------------------------------------------------

-------------------------------------------------AGCTATTTCATATACTACAATTACATTTTAT

TTGTTAACTAATTTTAT---------------------------------------------------------------

--------------------------------------------------------------------------------

--TTTTTATTGCAGTTAAATATTGCCTCTTTGAATTCCCCTCAACCCCTGGAAACCCCCTCTTGGAGCCTTCTGCCCTTC

GCTAATCTTACTTGTTGCT----------------------------------------CTCAACCTGCTACATTGTTAT

CCTAAGGATTTCCTTTGTCATCATAGGCA---------------------------------------------------

--------------------------------------------------------------------------------

--------------------------------------------------------------------------------

--------------------------------------------------------------------------------

--------------------------------------------------------------------------------

---------------TTCTGTTTGCCCAG---------------------------------------------------

--------------------------TGTTGCATCGCCCACTTCCTGGGTGTTCCCTCT---------------------

--------------------------------------------------------------------------------

----------------------------------------TCTGTAGCTTCC----------------------------

--------------------------------------------------------------------------------

--------------------------------------------------------------------------------

--------------------------------------------------------------------------------

---------------------------------TGAGGAATGCATAAAAGCTAAATTATTT-------------------

--------------------------------------------------------------------------------

--------------------------------------------------------------------------------

--------------------------------------------------------------------------------

--------------------------------------------------------------------------------

--------------------------------------------------------------------------------

--------------------------------------------------------------------------------

----------------------------------------------------TAAGACCTTACATATCTGAAACTTT---

-----------------------------------------------------------------------------TTT

TTTTAATTCTTATACTTACTTGCTAGTT----------------------------------------------------

--------------------------------------------------------------------------------

--------------------------------------------------------------------------TGGCTG

GATATATAATTAGCAGAAAATCATTTTT----------------------------------------------------

------------------------------------CCTCAGAATTTTGAAGACATTATTTCGTTGGTTTCTAGCTTTCA

GTGTTCCTGTTGCAAGGTTAATGTCATTTTAA------------TTCCTGATACTGTGTATGAAACTTGTTTCCCTTATT

CTTGAAACATTT--------------------------------------------------GAGATCTTCTTTTTGATC

CTAATCTTCTCAAAATTCATGATGATGAGCCCTGGAGTGTTCTTTTAAAATTTCTCATACTGATCACTTACGGACTCAAT

CAGTTGTCCTTTATTTTTGAAAATTTCTTGTAATATTTTTCT--------------------------------------

------------------------------------------------------------------GATACGTCTCCTAT

TTTTTCCCTCCGTTCTTGAAGCTCCTATTA----------------------------GAAGTTCGAATGC---------

--------------------------------------------------------------------------------

--------------------------------------------------------------------------------

--------------------------------CAGAATTATTTGTCTTATCTTCATATCTTTCCTCTACTGATTTCTTTC

TATTTTTTATTGTACTTTTAAAGAAAGTCCTTTTCAATTCTTCTATGTGTTTTTCCTGTTATCATTTTTTGAGGGGGGAG

GCCACACTCAAATCTATGTACCCTCAATG---------------------------------------------------

--------------------------------------------------------------------------------

--------------------------------------------------------------------------------

--------------------------------------------------------------------------------

---GTCCCCACTGCCACCTTTCATTGTAAGCCACCATTTTATATAATTT-------------------------------

-------------------------------------------CGACTTTGGCAGTGACCTCTTAACTGGTCACTCTCTT

TTCATTCTTGCCTCCTTGTCTGTTCTCCATATGTGAATAATAA-------------------------------------

--------------------------------------------------------------------------------

--------------------------------------------------------------------------------

--------------------------------------------------------------------------------

-------------------CCAGAGTGATCTTT----------------------------------AACAATTGAAGTC

AGATCATGCCATTCGCCTGCTGAAAATCCTTTGGTGGTTTTCACTGTGCTTAGAATGAAATCTTGACACCTTGCTGTGGC

CTG-------------GATTCAGCCCTCGTGTCTCTGACGTCCCATC------CCACTTCCCATCTTACTTCACTTTACT

CCAGTTGTACCTG-------TTTTCCCTTTCTGACAGATGCCAGCCTCCTTTCTGATGCATCCGTTGGATGTTTACAATA

AAACTGACTGCTTGTCATTTC-----CTTAAGAAGAATGGCAAATCCTTTAAGAGACTTATCCTCATCATCTCATCAAAA

GCGCTTTA--TCCTAGCTACTATCACATTTCCCTCT--TTTATTTATTTATTTTGTATTTAAAAAAATACTTAATTTGGC

TGTGCTGAGTCTTAGTT-------------------------GCAGCATGCGA-----------------ACTCTTAGTT

GTGGCAGTGGGATCTAGTTCCCTGACTGGGGCTCAAACCTGGG----------GCCCCTGCATTGGGAGCGGGGAGTCTC

AGCTACTGGGCCACCAGGGAAGTCCCTCCCGCTTTTATTTTAG-------------------------------------

--------------------------------------------------------------------------------

-------------------------------------------TCACAGCACTAACTGCTGCCCCAGATGTTCTTGCTTA

CT-------TGTTCACTGATGAACTCCTGCCCCTAGAGTGTTCCACCGGAGCAGGGTTACCTCTCTACCCCCAAAGTGTA

AAAATGGAGCCTGGCGAAAGAGTCAGCATTCAGACTGAGTGAGTGAACAAAGAGCCTGATGT---TTTTCTTTTCATGAA

CT-----------CCATAGTCCTTTTAAAAGTTATTAAATATT----TAAACTTTTCTACCCACTGGAGAATTAGAA---

----AATAAAAAA--------ACAAAGAT------------GATATTTGATAAATCCCAGGTT-----------------

--ATAAT-GGATTGTGGTAGAGCCC-----CATATGGTTTCT------------CAGCTGTCTGATTCCTAATCCATTGC

ACC--------CTTATATTTGTTATCCTAAGGCAAAACATTCCAATCTTTTGAAGACGA---------------------

-----AGTAGATTATATTATGCTTCTATTTCTGCTATATAATGCTTAGATTTTTGCT-GTGCTTGTCAAGGCTTATGTGC

TCAGTTGCTTCAGTTGTGTCCAACTGTTTGTGACCCCATGGACTGGGACCTGCTGGCCTCCTCTGTCCACAAGATTCTCC

AGAATTCAATCGGAGTAGGTTGCCAGGCCCTCCCCAGGGAATCTTCCTGACCCAGGGATCGAACCTGTGTCTCTTACATC

TCCTGCACAAGCAAGCGGGTTCTTTACCACTAGTGCCACCTGGGAAGCTCTTCAATAAGGAACTTAATACACAAAGTTTT

AAGTTATTCCAT--------TT-----TTTTAA---------AG-GTCCCCTGGAGGCAGACCCATTCATAAAAGGAAAA

GAGA---AGACTCACCTT

>Loxodonta_africana

TTGGATGTTCTAAAGGAAATGAATCAAGTTAAGCTCCGTGCTATTGAACG-GT-----ATGTTGT-------GGTGAAAT

AAACTGAAATATTATCAATGATGTTTT--AAAAAATTATTGTATTTGTTAAAGTAATATACATCTTTAAAAGAAAATCAT

ATATAATACAAGTCTTCTCTCTTGTTCCTTTTCACCCCCAAATGTTCCTCCCAGAG-GTAATCACTTTCGACTTCTT-TT

AGACTGTCTCATCT-------CCCTAT--------TTTTGAAAGAGTATACTTCTTTTGCTATTTCTTGATAT-TTAATT

GTATTTGCTTCTCATTTTAG---ATTAGTGATATGTTCTCT---------------------------------------

--------------------------------------------------------------------------------

------------------------------------TAGTCG--------------------------------------

--------------------------------------------------------------------------------

--------------------------------------------------------------------------------

--------------------------------------------------------------------------------

--------------------------------------------------------------------------------

--------------------------------------------------------------------------------

-------------------------------------------------------------TTTCACCCCTCAACACACA

CGTGCACACGTACACTGTT-----------------------------------------------TGTTACATCGTCCT

GATATA--------------------------------------------------------------------------

--------------------------------------------------------------------------------

--------------------------------------------------------------------------------

--------------------------------------------------------------------------------

--------------------------------------------------------------------------------

---------------GTTAGATCTCAA-----------------------------------------------------

--------------------------------------------------------------------------------

--------------------------------------------------------------------------------

----------------------------------------TCTTCAGT--------------------------------

--------------------------------------------------------------------------------

--------------------------------------------------------------------------------

--------------------------------------------------------------------------------

------------------------------------TAAATCATCAT---------------------------------

--------------------------------------------------------------------------------

--------------------------------------------------------------------------------

--------------------------------------------------------------------------------

--------------------------------------------------------------------------------

--------------------------------------------------------------------------------

--------------------------------------------------------------------------------

----------------------------------------------------TTAGAAATTGCACACATGGTCCCAACTT

GATGTTGT---------------------------------------------------------------------AGC

ACTGGGCCCTGTCAGTGAAATGGTGACTCTG-------------------------------------------------

--------------------------------------------------------------------------------

--------------------------------------------------------------------TTACCATGGCTG

CAGAAACAACTAAAAGGCCAGGTAGACTCTGTACCCTCCAGCCCCCTATTCTCATG---TGCCCCAACAACTAACCTTGT

TTTATATGTCATTGA-GAATCAGATGAGAATTCCCACATCTTTACACTGACAACGTTACTACTCGTGCTTTCTGACTTCT

GTCTTCGTACTGTGGATGAGGTGTCCTGTTCATGTCCAGGCTCCCTCCTTGCCCTCTTCTCGAGATTCCTCTTCTCTCTT

CTCAAGGATTTTACTTAAAATTATCCCTTCTCTCTCACATTGTCAGTCTTTCTTTCTTTACTTTATTGTTCTCCACACCT

GAGCATTTCCCATCTTCAAATCCTGCATACCCTCAGCTATTGTTCTGTTTCTCTGTACTTCTTTCTGATGTCAGTTCTCA

AAGTCTTCTGTAGTTTGTTTCCATTTCTCCCTGTCCTCTTCTACCCAC--------------------------------

----------------------------------------------------------------------TGTAATTTGA

TTTCTGTCTCCATCACTCCAATGAAAACTGCTTATCAAGCTCACCAGTGACATCCACGTAGCTCAATGGTCCGTTCTCTT

TTCTCACCTTACT-------------------------------------------------------------------

--------------------------------------------------------------------------------

--------------------------------TGACCTTGGCGGCATTTGATATAGTTTATGGCTCTCTCCTCCTTGGAA

TCTTTTTTCACTTGACGTCTGGGAAACCACACTCTTGGTTTTCCTTTTACCTCACTGGCCACTCCTTCT--------GCT

ATCTCTCTCCTGAACCGGGCCCCTAAATGTTGGAGTACCCTAGCTCAGCCCTTGGCCCTCTTCTCTTCTCCATCCACATT

ATTTCCTTTGGGGTTCTCATTTAGTCTTATGACTTTAAATACCAGCCATATGCTAATGACTGTCATATTTATTTTTCTAG

CCCTGAC--CTCCTCTTAGCCCCAAGTGCATATATTCAGATGCCTACCTGACATCTTCACTTACCTGTCTCATTCTTATG

TTT----------------CAGAACTCTTTGTTCTTCCCTGTCCCCTTCCTTCATCTTTGAAAACCTGTCCTTCCCCACG

TCCTTTTCCACTGCTACCCCCTAGTCTAAGCCTCCATCTTATCTAGCTT-------------------------------

---------------------------------------------------GGGCTTCTGTACTAGCCAATCTCTCTGTT

TTTATTTTTGCCTCCTTATCTATCCTTCATATGGTGACTACCAAAACAAACAAAGAAACAAAACCACACCTGCTGCTGTC

GAGTCT--------------------------------------------------------------------------

--ACTCTGACTCACAGTGACTCTATAGGACAGAGTAGAGCTGCCC-----------------------------------

---------CACAGGTTTTCCAAGGAGAGCCTGGTGGATTCAAATTGCCGGCCTTTTGGTTAGCAGCCGTAGCTCTTAAC

CGCTATGCCACCAGGGTTTCCACGGTGATCCCTT---------------------------------AAAAATTGAAGTC

AGGTCATGCCACTCCCCTGTCTGACACCCTCACTGGTTTTCCATTCTGCTTAGAATGAAATCCAGACCTCTTGCTGTGGC

CAGTAAGTCTCTCTGTGCTCCAGTCACTGCCTCTCTGCCTGACCTTTTCTCATCCTGATCCCCATTTTCCTCCCTGCACT

CCAGCTGTATTTGTTTCTCCTTTTTCTTTCCTCACACATG-CAGGCCCCTTCCTGATGCAGCCACAAGGTATTTACACTA

AAACAGACGCCTTCCTGCCATTCACGTTTCACTCAGATATCACCTCCTTAAAGAGGCTTTTTCTGATCATCTCATCTAAA

ATGCTTTCATTGCTAGTCATTGTCACATTCCTCTTTTATTTTATTCTCAGCTCTTGTCACTATCCAAAATTATCTCTTGT

TTACTCACTTATTA----------------------------ATAATATCCTG---------------------------

-----------------------------------------------------CCACTGGAATGTTCCATGGGAACAGGA

TACTGCTAGATC--------------------------------------------------------------------

--------------------------------------------------------------------------------

------------------------------------------CCCACAGGGTAAAACGGAGCATGGTATATTAGTAGGCA

TT-----------CAATGAGGG------------------------------------------------CC-GAGTGA-

-------AT----------------GAAT---GACCAAACGAATGGATTATTATCTTGATAG---CTTTCTTCCTATGAA

TT-----------CTATAGTGCTTTTAAAAGTTGTTAAATATTTCTGTAAGTTGTTCTACCTCCTG--------------

--------------------------GATATTTAACGCAGTGATTTTTGCAAACCC-TAGGTC-----------------

--ATAACAAGGTTATGGGAGGGCACTGCC-CACATGGTTTCT------------TGGTGTTCTGATTCTTAATTCATTGT

GCC-------CTCCAGGTTCTTAATTCCATGGCAAAGAATTTCAACCTCTTGCAAACTA---------------------

-----ATTAGATTGTAATGTATT-----------------ATGTTTATATTCCTGCT-ATATTTATTAA-----------

------------------------------------------------------------------CGAAGAG---CT--

TAAGCTGTAT----------------------------------------------------------------------

-----------------------------------------------------------------------CAAAGTTTT

AATTTATTCAAT--------TT-----TTTAAAAAAC-----AG-GTCACCTGGAGGTAGACTCGTTCATAAGAGGAAAA

GACA---AAATTCACAAT

**IL9**

>Mus_musculus

AGAGCGGGCCATGCTGGAGAGAGAGGCTGAGCGGTTAGCACATGAGGATG------------------------------

--------------------------------------------------------------------------------

---CGGAGTGTGAAAAGCTCATGGAGCTCTATGAACGGCTGGAAGAGCTGGAT

>Mus_spretus

AGAGCGGGCCATGCTGGAGAGAGAGGCTGAGCGGTTAGCACATGAAGATG------------------------------

--------------------------------------------------------------------------------

---CGGAGTGTGAAAAGCTCATGGAGCTCTATGAACGGCTGGAAGAGCTAGAT

>Rattus_norvegicus

AGAGCGGGCCATGCTGGAGAGAGAGGCTGAGCGCTTGGCTCATGAGGATG-GT-----ATGGCTC-ACACCCAGGGCTGG

GCTGGGCTGGG-----CTGGGCTTTCTTCTAGGA---CCCTCAGGGAGCTCA-CAGTCACGTGCTGCCCAC---------

AG-CGGAGTGTGAGAAGCTCATGGAACTCTATGAACGGTTGGAAGAGCTGGAT

>Cricetulus_griseus

AGAGCGAGCCATGCTGGAGAGGGAGGCCGAGCGGTTAGCTCACGAGGATG-GT-----AGGGCTCTGCACCAC-------

----GGGTGGG-----CTGGGCTTCCTCCGGGGA---CCCTCAGGGAGCTGA-TGGTCCTGTGTCACCCACCCGC-----

AG-CGGAGTGTGAGAAGCTCATGGAACTCTATGAGCGGCTGGAAGAGCTGGAT

>Microtus_ochrogaster

AGAGCGGGCCATGCTGGAGAGGGAGGCTGAGCGCTTAGCTCATGAGGATG-GT-----AAGGCTCTATACCCA-------

---GGGGCGGG-----CTGGGCTTCCTCCTGAAA---CCCTCGGGGAGCTGA-CGGTTATGTACTA-CCAC---------

AG-CGGAGTGTGAGAAGCTCATGGAGCTTTATGAGCGGTTGGAAGAGCTGGAC

>Nannospalax_galili

AGAGCGGGCCATGCTGGAGAGGGAGGCTGAGCGTTTGGCTCATGAGGATG-GT-----ATGGCTCCATACCCT-------

---GGGATAGG------GCGGCTTCCTCCTGGGAAA-CCTCAGGGAACCTGA-TGGCCATGTCCTGCCCAC---------

AG-CGGAGTGTGAGAAGCTCATGGAACTCTACGAACGACTGGAGGAGCTGGAT

>Jaculus_jaculus

TGAGCGAGCCATGCTGGAGAGGGAGGCAGAGCGGTTGGCTCACGAGGATG-GT-----ATGGCTCC-CACCCA-------

---GGAATGGG-----GCGGGCTTCCTCCCGGGAAA-CCCCAGCAAGCCTGA-TGGCCCTGTGCTGCCCAC---------

AG-CGGAGTGTGAGAAGCTCATGGAACTGTATGAGCGCCTGGAGGAGCTGGAT

>Castor_canadensis

AGAGCGTGCCATGTTGGAGAGGGAGGCTGAGCGACTGGCTCATGAGGATG-GT-----AGGACTCTAGACCCAGG-----

---GGAGTGGGGAGCGGGGGGCTTCTTCCTGGGAAAGACCCAGGGAGCCTGA-AAGCCATGAGGTGTTCAC---------

AG-CGGAGTGTGAGAAGCTCATGGAACTTTACGAACGCCTGGAGGAGCTGGAT

>Cavia_porcellus

AGAGCGGGCCATGCTGGAGAAGGAGGCTGAGCGTCTGGCTCACGAGGATG-GT-----AGGGCTGTAGGCCTG-------

---GAGGCGGGTGGGGGTAGGCTGCCTTCCGAGCCAGGTCCAGGAAGGCTGA-TGGCCTTGTGCTGCCCAC---------

AG-CGGAGTGTGAGAAGCTCATGGAGCTCTACGAGCGCCTGGAGGAGCTGGAT

>Homo_sapiens

AGAGCGGGCCATGCTGGAGAAAGAGGCAGAGCGGCTGGCTCATGAGGATG-GT-----AGGGCTCCAGACCTG-------

---GGCATAGG----GGTGGGCGTCCTCCCAGAAAGGCCCCCAGGAGCCTCA-TGGCCATACACTGTCCAC---------

AG-CGGAGTGTGAGAAGCTCATGGAGCTCTACGAGCGCCTGGAGGAGCTGGAT

>Bos_taurus

GGAGCGGGCCATGCTGGAGAGGGAGGCTGAGCGGCTGGCTCACGAGGACG-GT-----AGGGCTCCGGACCCA-------

---GGGGCATG----GGGTGGCTTCTCCCCGGGAAAGGCCCCAGGAGCCTCACTGGCCATGCGCCATCCAC---------

AG-CGGAGTGTGAGAAGCTCTTAGAGCTCTACGAGCGGCTGGAGGAGCTGGAT

>Loxodonta_africana

AGAGAGGGCCATGCTGGAGAGGGAGGCTGAGCGGCTGGCGCATGAGGATG-GT-----AGGGCTC-AGACCCAGGG----

---GAGGTAGG----TGCAGGCTTCCTCCTGGGAAGGCCCATGGGGGGCTTA-CAGCTATCTGCT-CCCAC---------

AG-CGGAGTGTGAGAAGTTGATGGAGCTGTATGAGCGCCTGGAGGAGTTGGAC

**IL10**

>Mus_musculus

ACATTCTCAGCCGCCTGGCAAACAGGGCGCCAGAACCTCCCCCACAGCAG------------------------------

--------------------------------------------------------------------------------

--------------------------------------------------------------------------------

--------------------------------------------------------------------------------

--------------------------------------------------------------------------------

--------------------------------------------------------------------------------

--------------------------------------------------------------------------------

--------------------------------------------------------------------------------

----------------------------------------------GTAGCCCAGCAGCAGTGAA---AGACCCAGAGTG

ATAT---CCACCTCCACCACTC

>Mus_spretus

ACATTCTCAGCCGCCTGGCAAACAGGGCGCCAGAACCTCCCCCACAGCAG------------------------------

--------------------------------------------------------------------------------

--------------------------------------------------------------------------------

--------------------------------------------------------------------------------

--------------------------------------------------------------------------------

--------------------------------------------------------------------------------

--------------------------------------------------------------------------------

--------------------------------------------------------------------------------

----------------------------------------------GTAGCCCAGCAGCAGTGAA----GACCCAGAGTG

ATGAG--CCACCTCCACCACTC

>Rattus_norvegicus

ACATTCTCAGCCGCCTGGCAAACAGGGCGCCAGAACCTCCCCCACAGCAG-GT-------AGGA----------------

TGTTT---------------------------------------------------------------------------

--------------------------------------------------------------------------------

-------------------------------------------------------------------------TAGTTGC

--------------------------------------------------------------------------------

---------------------------------------------------AGTTCTTC------CCACAAACCCACT--

-GGAACTTGTTCTTGGCTAATGTTAC--------------------------------------------------CTCC

CTTGACAGTAGGGACACCTGGGCTC-TGACGCTCT--CTCC-----TTGTCCTT--------------------------

---------------------------------CCTGT-----AG-GTAGCCCAGCAGCAGTGAA----GACCCAGAGTG

ATGAT--CCACCTCTACCACTA

>Cricetulus_griseus

ACATTCTCAGCCGCCTGGCAAACAGGGCACCAGAACCTCCCCCACAGCAG-GT-------AGGA------------CCCA

TATTT---------------------------------------------------------------------------

--------------------------------------------------------------------------------

-------------------------------------------------------------------------CAGTTGC

--------------------------------------------------------------------------------

---------------------------------------------------AGCTCTTC------CCACAAAGCCAT---

-GGAATTTGTACTTTGCTTGTGTCCT------TGGCTTTCCTAATGGTTG------------------------C-TTCC

TGGGGCCTCAGGGTTACTTGGCCTC----TGTTCTGACTCT---GGCTGTTTTT--------------------------

--------------------------------CCCTGT-----AG-GTAGCCCAGCAGCAGTGAAGAAAGACCCAGAGTG

ATGACA-CCACCTCCACCACTG

>Microtus_ochrogaster

ACATTCTCAGCCGTCTGGCAAACAGGGCACCAGAACCTCCCCCACAGCAG-GT-------AGGA------------CCAA

TTTCT---------------------------------------------------------------------------

--------------------------------------------------------------------------------

-------------------------------------------------------------------------TAGTTGC

--------------------------------------------------------------------------------

---------------------------------------------------AGCTCTTG---------------TGTTCT

TGGCTTTCCTACCTCGGCTCTGTT--------------------------------------------------------

-------------------------------TTCTGACTCT--TGGCTGTTTAT--------------------------

--------------------------------CCTTCT-----AG-GTAGCCCAACAGCAGTGAA----GACCCAG--CG

ATGATC-CCACTTCCACCACTG

>Nannospalax_galili

ACATTCTCAGCCGCCTGGCAAACAGGGCACCCGAACCTCCCCCACAGCAG-GT-------AGGA------------CCAT

TTTTCAC-------------------------------------------------------------------------

--------------------------------------------------------------------------------

-------------------------------------------------------------------------TTGATGC

--------------------------------------------------------------------------------

---------------------------------------------------TAGTCTTC------CCACAAAACCACTCT

-GGAACTTGTA------CTCTGTCTC------CAGCTTCATTCCTGGGCA------GCTGGGCTGTGGATGAGTTGTTCC

TGGGCATTGGGAGCTACCTGGGCCC-TGCCATTCTGACTCC--TGGTTGTCTTT--------------------------

--------------------------------CCCTGT-----AG-GTAGCCCAGCAGCAGTGAA----CATCCAGAATG

ATGATA-CCACCTCCACCACGG

>Jaculus_jaculus

ACATTCTCAGTCGCCTGGCAAACAGGGCGCCCGAACCTCCCCCACAGCAG-GT------TAGGACTTTTTCCCTGCCCAC

TTTTTTTTTTTAATTAAAAAAAAAT-------------------------------------------------------

--------------------------------------------------------------------------------

-------------------------------------------------------------------------TATTTGA

--------------------------------------------------------------------------------

-----GAGAGAGAGCGGGGGGGTGGGGGGGGGCAGATAGAATGGACATGCTAGGGCCTCCAGCCACTGCAAACAAACTCC

AGATGTGTGCGCCC---CCTTGTGTATCTGGCTAACGTGGGCCCTGGGAA-----GTCGAGCCTCAAACCGGGGT-CCTT

AGGCTTCACAGGCAAGCCCCTACCCGCTAAGCCATCTCTCC---AGCCCTCCCTGTCACCTCTTGCACCGCGCCCTGGCC

GTGCTGTGTGCCAGCCCGTGACCTTGGCTCTCCCCCGC-----AG-GTGGCCCAGCAGCAGTGAA----GATGCAG----

-------GCACCTCCTCCGCAG

>Castor_canadensis

ACATTCTCAGCCGCTTGGCAAACCGGGCACCTGAACCTCCCCCACAGCAG-GT-------TGGA------------CCAT

TTTTTTC-------------------------------------------------------------------------

--------------------------------------------------------------------------------

-------------------------------------------------------------------------TATGTGC

--------------------------------------------------------------------------------

--------------------------------------------------CAATTCTTC------CCACAGAACCATTCT

-GGAACTTGTAACTTTGTTCT-TGTCTGTAACTACTACTAGTAGTTGGAC--------TGTCTTGTCACTGAAGT-CCCT

TGGGATCTGGTA-ATTCCTGGGGTC-TGGAATTCTGACTCT------TATCTTT--------------------------

--------------------------------CCCTAT-----AG-GTAGCCCAGCAGCAGTGAA----GATCCAGATTG

AGGATAACCACCTCCACCGCTG

>Cavia_porcellus

ACATTCTCAGCCGCCTAGCAAATCGGGCACCAGAGCCGCCTCCACAGCAG-GT-------AGGA------------CCTT

TTTTTTTTTTTTAAATTAAGTTTATTGTTACATTTTAGGTATATGTGATACCTTATTCATTATAGAAAGTTTGTACCAGC

ACATGACAGAACTTCTCTTTTCCCCTCATTTCCCTACCCTTTCTTGAACCCTTCTTATTTACAAAAGCTTTGTTTCCATT

TTTTCTCATCATTTTTTCTGTTTCCTTCCTACCTACCTTCCTTTCCCTTTCTCCCATCTCTAGTTCCCTTCCCCATTTGC

ACATTTTCTTCCTATTTCACAGTATCTGTTATACATTTTGGTCCTTACTTACATCTTTGGTTTCTCACACCAGAGAAACA

ATGCAGTTTATAAATATATACCTGTGTTAGGACCATTTTCTTCTCTGTGTGAGATCTTC------CCATAGAACTGTTTA

-TGGACTTGTATTTTTGCTCTGTTTC------TAGTTTTACTCCCGGGTA---GCACCTGCACTGTCCAGTGAGT-CCCC

TGGGCTCACGTGCAGTTCTGTGGTC-TGGAATTCTAACTCT--TGGCTGTC--T--------------------------

--------------------------------CCCTGT-----AG-GTTGCCCAGCAGCAGTGAC----CGTCAGGATTG

GTGGTGACCACCTCCACAGCTG

>Homo_sapiens

ACATTCTCAGCCGCCTGGCAAACCGGGCACCCGAACCTACCCCACAGCAG-GT-------AGGA------------CCAT

TTTCTTC-------------------------------------------------------------------------

--------------------------------------------------------------------------------

-------------------------------------------------------------------------TTGACAC

--------------------------------------------------------------------------------

--------------------------------------------------CACCTCTTC------CTGCAGAACCATTCT

-GGAGCTTGTAACTTTGCTGTATGTC----CCTAGCTTTACATACTGGGT-----GGGTGGCCTATCAGTGAATT-CCCT

TGAGATTGGGTGGATTCCTATCATC-TGGAATTCTGACTCC-TCGGGTCTCCTT--------------------------

--------------------------------CTCT-------AG-GTAGCCCAGCAGCAGTGAA----GATGCAGNNNN

NNNNNNNNNNNNNNNNNNNNNN

>Bos_taurus

ATATTCTCAGTCGCCTGGCAAACCGGGCGCCTGAACCACCTCCACAGCAG-GT-----ATAGGA------------CCAT

TTTCCTC-------------------------------------------------------------------------

--------------------------------------------------------------------------------

-------------------------------------------------------------------------TGGCC--

--------------------------------------------------------------------------------

---------------------------------------------------AGCTGTTG-------AACAGAGCCATTCC

AGAAGTTGGAAACTTTGCTGTTTGTC----CCTAGCTTTACAGGCTGGGCAGCGGGGTGGGCTTACCAGTGAGTT-CTCT

TGGGATCTGGTGGGTTGCTGTGGTCTTGGAACTCTGACTCCCTTGGCCTTGTCT--------------------------

--------------------------------TCCTAT-----AG-GTAGCCCAGCAGCAGTGAA----GACCCAGATGG

AAAATA-CCACCTCCACCGCTG

>Loxodonta_africana

ACATTCTCAGCCGCCTGGCAAACCGGGCACCTGAACCTACTCCACAGCAG-GT-------ACGG------------CCAT

TTTCTTT-------------------------------------------------------------------------

--------------------------------------------------------------------------------

-------------------------------------------------------------------------CAGCT--

--------------------------------------------------------------------------------

---------------------------------------------------TACTCTTC------CAGCAGAGCAATTCT

-GGAACTTTTAACTCTGCTCTGTGTCGCTAGCTAGCTTTACATACTGAACCAGGTGGGGTTGTCTTATCAGAGTT-TTCT

TG-------GTGAATTCCTGTGGTC-TGGAATTCTGACTCT----GTTCTGTTT--------------------------

--------------------------------CCTTAC-----AG-GTAGCCCAGCAGCAGTGAA----GATCCAGNNNN

NNNNNNNNNNNNNNNNNNNNNN

**IL11**

>Mus_musculus

TCCGAGACAGGACAGATATCCAGTGCCTCATCCCGTGTGCCATTGACCAG------------------------------

--------------------------------------------------------------------------------

--------------------------------------------------------------------------------

--------------------------------------------------------------------------------

--------------------------------------------------------------------------------

--------------------------------------------------------------------------------

--------------------------------------------------------------------------------

--------------------------------------------------------------------------------

--------------------------------------------------------------------------------

----------------------------------------------------------GATCCGTACTTCAGAATGACAA

GGGACGTGGCCCCCAGGATCGGCCATCC

>Mus_spretus

TCCGAGACAGGACAGATATCCAGTGCCTCATCCCGTGTGCCATTGACCAG------------------------------

--------------------------------------------------------------------------------

--------------------------------------------------------------------------------

--------------------------------------------------------------------------------

--------------------------------------------------------------------------------

--------------------------------------------------------------------------------

--------------------------------------------------------------------------------

--------------------------------------------------------------------------------

--------------------------------------------------------------------------------

----------------------------------------------------------GATCCGTACTTCAGAATGACGA

GGGACGTGGCCCCCAGGATCGGCCACCC

>Rattus_norvegicus

TCCGAGACAGGACGGATATCCAGTGCCTCATCCCATGTGCCATTGACCAG-GT-----TGGGAGGC----------AGCT

G---------GGGCTGCCAGCTTCGGGTTTAGA-------------CTCCTGGACAGGG---------------------

--------------------------------------------------------------------------------

--------------------------------------------------------------------------------

--------------------------------------------------------------------------------

--------------------------------TGGAGGTGTTGGAGAGGGTGTTGAAAGACCAGGAGCC-----------

------------------AGTTTGAAAC----------------------------------------------------

--------------------------------------------------------------------------------

--------------------TGGCTGCAAGAGTCATGGCCTCCCATGAGGGTGGCTCCTTGAGGGTGGCTCATTGGCCAG

AGCCTGGCTATTTGTTCCCTTGTCTTCA-CCAAGCC----TTCTCCACCC-----AG-GACCCGTACTTCAGAATGACAA

GGGATGTGGCCCCCAGAATCGGCCATCC

>Cricetulus_griseus

TCCGAGACAGGACGGACATCCAGTGCCTCATCCCATGCGCCATTGACCAG-GT-----TGGAGGCAGAGCCGACTGTGGG

AAGTGAATT-GGGGC--CAGCTGC-GGTTGCAGGG---------CTCCCCTGGGGAGGG---------------------

--------------------------------------------------------------------------------

--------------------------------------------------------------------------------

--------------------------------------------------------------------------------

--------------------------------TGGAGGTGA--TAGA-AGTGGTGAGAGAAGAGAAGTC-----------

------------------AGTTTGAAAC----------------------------------------------------

--------------------------------------------------------------------------------

-------------------------------------------------------------------------TGGCCAG

AGCCTGGCCATTGGTCCCATTGTCTTCACCCCAGCC----TTCTCCACCT-----AG-GACCCTTACTTCAGAATGACGA

GGGACGTGGCTCCCAGGATCGGCTACCC

>Microtus_ochrogaster

TCCGAGACCGGACGGACATCCAGTGCCTCATCCCGTGTGCCATTGACCAG-GT-----TGGAGGCAGAACCAGCTGTGGG

ACGTGAAAT-GGGAC--TGCCTGT-GGTTTTGGGA---------CTCTCCTGAGGAGGG---------------------

--------------------------------------------------------------------------------

--------------------------------------------------------------------------------

--------------------------------------------------------------------------------

--------------------------------TGGAGGTGGGCTATA-CGTGTTTAGAGAAGAGAAGCC-----------

------------------AGTCTGAAAC----------------------------------------------------

--------------------------------------------------------------------------------

--------------------TGACTGCAGGCTTCACAGCCTCCCACGAGGGGGGCTCCTTTGTGGTGGCCCATTGGCAAG

AGCCTAGACGTGTGTTCCATTGTCTTCACCCAAGCC----TTCTCCACCC-----AG-GATCCGTACTTCAGAATGACAA

GGGACGTGGCTCCCAGGATCGGCCACCC

>Nannospalax_galili

TCCGAGACAGGACGGATATCCAGTGCCTCATCCCATGTGCCATTGACCAG-GT-----AGGAAGGCAGAGTG----AGCT

TCTGGAAAT-GGGGC--TGGTCGT-GGTTTTTAGGA--------CTCTCTTCAAGGTAG---------------------

--------------------------------------------------------------------------------

--------------------------------------------------------------------------------

--------------------------------------------------------------------------------

--------------------------------GGGAGGGGTGGTAAGAAGTGTCGGAAGAAGAAGGGGC-----------

------------------AGTTTGAAAC----------------------------------------------------

--------------------------------------------------------------------------------

--------------------TGACCAGAAGCTCCA--GCACCCAAGGAGTGTGGCCCCTT--GGGCTGCTCACTGGCCAG

AACCTGGCCATTTGTTCCAGCTTTCTCAGCCAAGTC----TTCTCCCCC------AG-GATCCTTACTTTAGGATGGCAA

GGGACGTGGCCCCCAGGATCGGCCATCC

>Jaculus_jaculus

TCCAAGACAGGACAGATATCCAGTGCCTCATCCCGTGTGCCATTGATCAG-GT-----AGGAA-------------AGTT

ACGGAAGCC-AGGGC--TGGTGGT-GGTTTCTAGGA----------CACTTCAGAGAGA---------------------

--------------------------------------------------------------------------------

--------------------------------------------------------------------------------

--------------------------------------------------------------------------------

--------------------------------GGGAGGCAAAGTATC---------------------------------

--------------------------------------------------------------------------------

--------------------------------------------------------------------------------

--------------------CGGCAGGAAGTTCAAGAGCCTCCCGTGAGGGTAGCTCCTCTGGGGCTGCTCACTGGC---

---------ATTTATTCCAGCATCCTCACCCAAGCC-----TTTCCTCCC-----AG-GATCCTTACTTCAGGATGACAA

GAGATGTGGCCCCCAGGATTGGCTATCC

>Castor_canadensis

TCCGAGACAGGACAGACATCCAGTGCCTCATCCCCTGTGCCATTGACCAG-GT-----CAGA--------------AGTT

CTGTGAGCCAGGGAC--TGGCTGCAGGTTTCTCTGA----------CTCTTTACTGGGA---------------------

--------------------------------------------------------------------------------

--------------------------------------------------------------------------------

--------------------------------------------------------------------------------

--------------------------------GGTAGGGTTG------AGTGTTGGAGGAAGAATGAGCCCAT-------

------------------CTCTTGAAAC----------------------------------------------------

--------------------------------------------------------------------------------

--------------------TAGC-AGAAGCCCAAGAGTCTCCCACGAAGAT-----CTCTGGGGCTGCTCGTTAGCCAA

AGGCTG--CGTTTGTT-CAACATCCTCATCCAAGCC----CTCTCCCCAC-----AG-GACCCTTACTTTAGGATGACAA

GGGATGTCGCCCCCAGGATTGGATATCC

>Cavia_porcellus

TCCGGGACCGGACGGACATCCAGTGCCTCATCCCGTGTGCCATTGACCAG-GT-----CAGC--------------GGCG

GCACGGGCC-GGGGC--CGG-----GGTC--------------------------GGGG---------------------

--------------------------------------------------------------------------------

--------------------------------------------------------------------------------

--------------------------------------------------------------------------------

--------------------------------------------------------------------------------

--------------------------------------------------------------------------------

--------------------------------------------------------------------------------

-----------------------------------------------------------CCAGTGCTCTGCGCAGGCCG-

-----------------CAGCGACCTCAGCCC--TC----TTCTGTCCCC-----AG-GATCCCTACTTCAGGATGACGC

GGGACGTGGCCCCCAGGATCGGCTACCC

>Homo_sapiens

TCCGAGACAGGACGGATATCCAGTGCCTTATCCCATGTGCCATTGACCAG-GT-----CAGCAGGCAGAAAAGCAAGGCT

CTCTAAGTCTGGGGCATTGACAGCAGGTTCCTCTTA----------CTCTTCAGCGGGGAGAGGTATTGAAAGATATGAT

GGGCAGCCAGGCAGGGTGGCTCACGCCTGTAATACCAGCACTCTGGGAGGCCAAGGCAGGCGGATCACTTGAGGCCAGGA

GTTCAAGACCAGCCTGGCCAACATGGCGAAACCCCGTCTCTACTAAAAATACAAAATTTAGCCACATGTGGTGGCAGGCG

CCTGTAATCCCAGCTACTCGCCTCGCTTGAACCCCAGAGGCAGAGGTTGCAGCGAGAGCGCATCACTGCACTCTAGCCTG

GGCGACAGAGCAAGGCTCTGTCTCAAAAAAAAGGAAAGAAAGTTGGGGAGTGGGGCAAGGGGAGGGAGAGCATTAGGACA

AATACCTAATGCATGCGGGGCTTAAAACCTAGATGACGGGTTGATGGGTGCAGCAAACCACCATGGCACATGTATACCTA

TGTAACAAACCTGCGTGTTCTGTACATGTATCCCAGAACTGGAAGTAAAATTTAAAAAAAAAAAAGGAAAAGATGAAGGG

GAGGAGGGAGTGAATTTCTTTGGTTGGAAGCATGAGAGCCTTCTGGGAAGATG--CTCACAGGGACTGCTCA-TGGCTGA

AAGCTGGCATGTTTTCTGGCCGCCCTCATCAGGGTCCTTACTCTCCCCAC-----AG-GATCCTTACTTTAGAATGACAA

GGGACGTCGCCCCCAGGATCGGCTATCC

>Bos_taurus

TCCGAGACCGGACGGACGTCCAGTGCCTCATCCCGTGCGCCATCGACCAG-GT-----TAGGAGGCAG--AGCCAGGGTT

CCGTCAGCC-TGGATGTTAGCAGG-GGTCTTCA-----------CCCGCTTCAGGGGTG---------------------

--------------------------------------------------------------------------------

--------------------------------------------------------------------------------

--------------------------------------------------------------------------------

--------------------------------GGAAGGAGGGTCTGACGGTGGTGCA-----------------------

--------------------------------------------------------------------------------

--------------------------------------------------------------------------------

----------------------------------------------GGGCAGAGTTACTCGGGAGGTGCCCGCCAGCTGA

GGGCAGCCCTCGTCTCCCCCTGCCCCTG-------------CCTCCCCAC-----AG-GACCCGTACTTCAGGATGACCA

GGGACGTGGCCCCCAGGATCGGCTACCC

>Loxodonta_africana

TCAAGGACAGGGCGGACATCCAGTGCCTGATCCCCTGTGCCATTGACCAG-GT-----CAG---------------TGCA

GTCAGGGCT-ATGGG--TGGCTGGGCGTTTTCAGGAGACGCCTGCGCTCTTCACTGGGG---------------------

--------------------------------------------------------------------------------

--------------------------------------------------------------------------------

--------------------------------------------------------------------------------

--------------------------------AAGAGGATTGTAAGA---------------------------------

--------------------------------------------------------------------------------

--------------------------------------------------------------------------------

--------------------TAATTGGAAGCATGAT-GCTTCCTGGGAAGA---CTTCTCTGGTGCTGCTCGCT-GCTGG

AAGCTGCCTGTGGTCACAGCTGTCCTCG---------------TCCCTCC-----AG-GATCCTTACTTCAGAATGACGA

GGGACGTCGCCCCCAGGATCGGCTACCC

**IL12**

>Mus_musculus

GGCTTTAACCAAGCAGATAAGGCCATCAACACCGCCGTGAAGTCAGGCAG------------------------------

--------------------------------------------------------------------------------

-----------GTGGGTGATGTTGAAGAACGTGCACCTGGCCCCGGGCTGGCTGATGCAGC

>Mus_spretus

GGCTTTAACCAAGCAGATAAGGCCATCAACACCGCCGTGAAGTCAGGCAG------------------------------

--------------------------------------------------------------------------------

-----------GTGGGTGATGTTGAAGAACGTGCACCTGGCCCCGGGCTGGCTGATGCAGC

>Rattus_norvegicus1

GGCTTTAACCAAGCAGATAAGGCGATCAACACCGCGGTGAAGTCAGGCAG-GT-----GGGTGCGATTG-GTTTCCTCCT

AAAA----CC--TGTGTCC---CCGGGAATCCAGT--GAAAGCC-ATCGAGTCA---CTGTGACT--CTG----CATGCA

C-------AG-GTGGGTGATGCTGAAGAATGTGCACCTGGCCCCCGGGTGGCTGATGCAGC

>Rattus_norvegicus2

GGCTTTAACCAAGCAGATAAGGCGATCAACACCGCGGTGAAGTCAGGCAG-GT-----GGGTGCGATTG-GTTTCCTCCT

AAAA----CC--TGTGTCC---CCGGGAATCCAGT--GAAAGCC-ATCGAGTCA---CTGTGACT--CTG----CATGCA

C-------AG-GTGGGTGATGCTGAAGAATGTGCACCTGGCCCCCGGGTGGCTGATGCAGC

>Cricetulus_griseus

GGCTTTAACCAAGCAGACAAGGCCATCAACACTGCTGTGAAGTCAGGCAG-GT-----GGGTGCAGTTG-GCTTGATCTT

ACAAAGTCCCTGTGTGTCC---CCAGAGTCCCTGT--GAAAGCC-ACCAAGTCA---CTCTGACC--TTG----TGTGTG

C-------AG-GTGGGTGATGCTGAAAAATGTGCACCTGGCCCCAGGGTGGCTCATGCAGC

>Microtus_ochrogaster

GGCTTTAACCAAGCAGATAAGGCCATCAACACCGCTGTGAAGTCAGGCAG-GT-----GGGTGTGATTG-GCTTGGTCTT

AAAAA---CCTATGTGTAC---CCAGGATCCCTGT--GAAGGCT-GTCCAGTCA---CTGTGACC--TTG----TGTGTG

TGC-----AG-GTGGGTGATGCTGAAGAATGTACATCTGGCCCCAGGGTGGCTAATGCAGC

>Nannospalax_galili

GGCTTTAACCAGGCAGATAAGGCCATCAACACTGCAGTGAAGTCAGGCAG-GT-----AGGC-TGACTG-GTTTGGTCTT

AAG-----CC--TGTGTCTGAGTCAGGACTTCCGGT-GGAAGCC-GGCACATCACTGCTGTGGCT--CT-----TGTGTG

TGC-----AG-GTGGGTAATGCTGAAGAACGTCCACCTGGCCCCAGGGTGGCTGATGCAGC

>Jaculus_jaculus

GGCTTTAACCAAGCAGATAAGGCGATCAACACTGCTGTGAAGTCGGGCAG-GT-----AGGCCTGATTG-GGTTGGCTTG

AAAAG---CC--TGGGCC----CCGGGAATTTCGG--CGCAGCC-CTCGCGTCA-CGCCGTGCCCTGTCTGTCTCATGTC

TGT-----AG-GTGGGTGATGCTGAAGAACGTGCACCTGGCCCCGGGCTGGCTGATGCAGC

>Castor_canadensis

GGCTTTAACCAAGCGGATAAGGCAATTAACACCGCTGTGAAGTCAGGCAG-GT-----AGGCCTAATTG-GTTTTGTTTT

AAAAA---CC--TGAGTCC---CCAGGAATTGTGGTGGAAGGCC-CGAGTGTCA---CTGTGCCT---TTTCTCTGTGTG

CGC-----AG-GTGGGTGATGCTGAAGAATGTTCATTTGGCCCCAGGATGGTTGATGCAAC

>Cavia_porcellus

GGCTTTAACCAAGCAGACAAGGCCATCAACACGGCTGTGAAGTCTGGCAG-GT-----AGGCCCAGGGG--------TGC

AGCACAGGTC--CCTGGCT---CCCGGCTCCCGGG--GAGGGTG--------TGCAGCTGAGGCT--CC-----CTTTCC

CGC-----AG-GTGGGTGATGCTGAAGAACGTGCACCTGGCACCCGGCTGGCTGATGCAGC

>Homo_sapiens

GGCTTTAACCAAGCAGATAAGGCAATAAACACCGCTGTAAAGTCGGGCAG-GT-----AGGCCTGTTCT-CTTTGGCTGA

AGAAAG--CC--TTAGTCC---CCAGGCATTCAGGCAGGCAGCCTGGCATGCTG----TGTGACT--CTCACTTTGTGTG

TGC-----AG-GTGGGTGATGCTGAAGAATGTGCATCTGGCCCCAGGGTGGCTGATGCAGC

>Bos_taurus

GGCTTTAACCAGGCAGACAAGGCAATAAACACAGCTGTGAAGTCGGGCAG-GT-----AGGCTGCTTTG-GTTTTGCTTC

ATGAGG--CC--CGAGTCC---CCAAGGATTCCG-------GCCAGAGACGTGA-GGCTGCGGCCTTCTC----CCTGCC

CAC-----AG-GTGGGTGATGCTAAAGAACGTCCACCTGGCCCCGGGCTGGCTGATGCAGC

>Loxodonta_africana

GGCTTTAACCAGGCAGACAAGGCAATAAACACGGCCGTGAAGTCCGGCAG-GT-----AGGCCTGGCCGTGTGTGGTTAT

GA----------CATGTCGGCCTCGGGAGCTGAGTCAGGAGCCG-GCAGTGCTA----CATGCTT---TCCCTTCCTGTG

TGT-----AG-GTGGGTGATGCTGAAGAACGTGCACCTGGCGCCCGGGTGGCTGATGCAGC

**IL13**

>Mus_musculus

TGAAGGTCAACAGCAGCCTGAGTGACGAGCTGCGGCGGCTGCAAAGGGAG------------------------------

--------------------------------------------------------------------------------

--------------------------------------ATCCACAAATTGCAGGCAGAGAACCTGCAGCTTCGGCAGCCA

CCCGGA-CC

>Mus_spretus

TGAAGGTCAACAGCAGCCTGAGTGACGAGCTGCGGCGGCTGCAGAGGGAG------------------------------

--------------------------------------------------------------------------------

--------------------------------------ATCCACAAATTGCAGGCAGAGAACCTGCAACTCCGGCAGCCA

CCCGGA-CC

>Rattus_norvegicus

TGAAAGTCAACAGCAGTCTGAGTGACGAGCTTCGGAAGCTGCAGAGGGAG-GT-----GAGCACTGTGGCCG----GGGA

GTGGCAGAAAAGCATCCAAGATT--CTGGGAGT-GGGGTCACCCTTTCC-AAAGGTG---GTACCTACCTTGACCCAGAG

GT--GGACACCATTATGTAC----ACTC-------AG-ATCCACAAACTGCAGGCAGAGAACCTGCAGCTCCGGCAGCCA

CCAGGA-CC

>Cricetulus_griseus

TGCAGGTCAACAGCAGCCTGAGTGATGAGCTCCGGAGGCTGCAGAGGGAG-GT-----GAGCACTGTTGCTT--GCGGGA

GCAGGAGGAAAGCATCAGAGGCT--CTGGGAGGAGAGGTCATCTCTTCCCAAAGGTG---GTACCTACCCTGACCCAGAG

TT--GGATACCACTGTGTAC----ACTC-------AG-ATCCACAAACTGCAGGCAGAGAACCTGCAGCTTCGGCAGCCG

TCAGGG-CC

>Microtus_ochrogaster

TGAAGGTCAACAGTAGCCTGAGTGATGAGCTCCGGAGGCTGCAGAGAGAG-GT-----AAGCACTGTGGCT---GAGGGA

GGGGTAGAAAAACATCCAAGGCT--CTGGGAGTTTGGATAGCCCCTTCCCAAAGGTG---GTACCTACTTTGACCCAGAG

TT--GGGCACCACTGTGTAC----ACTC-------AG-ATCCACAAACTGCAGGCAGAGAACCTGCAGCTCCGGCAGCCG

CCAGGG-CC

>Nannospalax_galili

TGAAGGTCAACAGCAGCTTGAGTGATGAACTCCGGAGACTACAAAGGGAG-GT-----AAGGGCTGCAGCCT--GTGGGA

GTGGTGGGAAGGTATCTAAAGCC--CTGGGAAT-GGGATCATTCTTTCCCAAAGGTGGCAGCACCCACCTGGACCCAGAA

TT--GGACACTACTGTGTAC----ACTTAC-----AG-ATCCACAAACTGCAGGCAGAGAACTTGCAGCTCCGGCAGCCA

CCGGGG-CC

>Jaculus_jaculus

TGAAGGTCAACAGTAGCTTAAGTGATGAGCTCCGGAGGCTGCAGAGGGAG-GT-----GAGGGCTGCAACCTT-ACGGGG

GTGATTAGAAGGTGACCTGGGCT--CTGGGAGCTGGGATCACCCTTTCTTAATGGTGGCAGTGTCCACCTGGACT--GAG

TT--GGATATCACTGTGTT-----GCTCAC-----AG-ATCCACAAACTGCAGGCAGAGAACCTGCAGCTCCGGCAGCCA

CCAGGA-CC

>Castor_canadensis

TGAAGGTCAACAGCAGCCTAAGTGATGAGCTCCGGAGGCTGCAGAGAGAG-GT-----GAGGGCTGTGACCTC-ATGGAG

ATGGTAGGAAGACTTCCAGGACT--C-AGGAGGGAGGATCACCCTTTCCCAAAAGTA--------------GACACAGAG

TA--GGACACCATTGTGTAC----ACTCAC-----AG-ATCCACAAGCTGCAGGCAGAGAACCTGCAGCTCCGGCAGCCA

GCAGGG-CC

>Cavia_porcellus

TGAAGGTCAACAGCAGCTTGAGTGATGAACTTCGGAGGCTCCAGAGGGAG-GT-----AAGGGCCGCAGCCC----AGGG

TGGGTAT-------TGTAAGACT--CTGGCAG--GGAAGGGTGCCTTCTCAGAGGTGGG-GTGCCTGGCTGGATGCAGGG

GC--GGATACCA-TGTGTGT----ACTCAC-----AG-ATCCACAAGTTGCAAGCAGAGAACCTGCAGCTCCGGCAGCCA

CCAGGGGCC

>Homo_sapiens

TGAAGGTCAACAGTAGCCTGAGCGACGAGCTCCGGAGGCTGCAGCGAGAG-GT-----GAGGG-TGCAGCCTCGGTGGGA

GGGGGAG------CCCCAGGACT--CCAGGGG-----------------------------------------------G

TT---GACAGCACTTTGC------ACCCAT-----AG-ATCCACAAGCTGCAGGCGGAGAACCTGCAGCTCCGGCAGCCT

CCAGGG-CC

>Bos_taurus

TGAAGGTCAATAGCAGCCTGAGTGATGAGCTCCGGAGGCTGCAGAGGGAG-GT-----GAGGA-------------GGGG

GC------------TCCCGGGCCCGCTGGGTGGGGAAGAGGCACGCTCCGGGAGGCGGCGGTGCT-------GCCCGGGG

TTTCTGACACCCCTCTC-------ACTCTC-----AG-ATCCACAAGCTGCAGGCCGAGAACCTGCAGATCCGGCAGCCA

CCAGGG-CC

>Loxodonta_africana

TGAAGGTCAATAGTAGCTTGAGTGATGAGCTGCGGAGGCTGCAGAGGGAG-GT-----GAGGGCTGCAGCCTCGGTGGGA

GCGGGGG------------------CTGGGGG----------------------------GGCCCTGCCTGGAC-CGGAG

TTTCTGACACCACCATGTGCGGCTGCTCGT-----AG-ATCCACAAGCTACAGGCAGAAAACCTGCAGATCCGGCAGCAG

TCGGGG-CC

**IL14**

>Mus_musculus

ACCAGGACGCCCAGCGCCATGTGGCTGCAGGCACCCAGCAGCCCTACACG------------------------------

--------------------------------------------------------------------------------

--------------------------------------------------------------------------------

--------------------------------------------------------------------------------

--------------------------------------------------------GATGGTGTGAGGATGGAGGAGATC

GTGGAAGGCTGCACCGGAGCCCTGCA

>Mus_spretus

ACCAGGATGCCCAGCGCCATGTGGCTGCAGGCACCCAGCAGCCCTACACG------------------------------

--------------------------------------------------------------------------------

--------------------------------------------------------------------------------

--------------------------------------------------------------------------------

--------------------------------------------------------GATGGTGTGAGGATGGAGGAGATC

GTGGAAGGCTGCACCGGAGCCCTGCA

>Rattus_norvegicus

ACCAGGATGCCCAGCGACATGTAGCTGCGGGCACCCAGCAGCCCTACACG-GT-----AAGAGAGCTTAGTGGTGTCAGG

GATGGACTCCTTGG--------------GGTGTGTCCTCAGGG-------------------------------------

-------------------------------------TTTATGTGTCTAGA-----------------AGAAGAG----G

CGAGTTGACACTAATGTCAACTCTAGGGCCTGATGAATGGTGTCAGGGTGT---------------------GCTTTGTC

CAGGGGCCACCTGTCCCCCTCCTCTTGTTTCATGGCTCTTCTCATGC------AG-GATGGTGTGAGGATGGAGGAGATC

GTGGAGGGCTGCACCGGAGCCCTGCA

>Cricetulus_griseus

ACCAGGATGCCCAGCGACATGTGGCCGCAGGCACCCAGCAGCCCTACACG-GT-----AGATGAGCCTAGTGGCGACTGA

GATAGCCTTCTT-GGAGGGGCTGGGGCGGGGGTGTCCTCAGAG-------------------------------------

-------------------------------------TTTGTGTGTATATA-----------------AGAAGAAGTGTG

TGTGTTGACATCAACGCCAACTCCAGGAACTAGTGAGCAGTGTTAGG--GTCCTGGTCGGAGAG--GTTGCGGCTTTGTC

CAGGGCCCCCTTGTCCCCATCCTCGTGTTTCACGGCCCTTTTCATGC------AG-GATGGCGTGAGGATGGAAGAGATC

GTAGAGGGCTGCACTGGAGCCCTCCA

>Microtus_ochrogaster

ACCAGGATGCCCAGCGACATGTGGCCGCCGGCACCCAGCAACCCTACACG-GT-----ACATGAGCTCAGTGGCAACTGA

GGTAGCCTCTTTGGGAGGGGACGCCAGGGGAGGGTCCTCAGAG-------------------------------------

-------------------------------------TTTGTGTGTTTGAA-----------------ATAAGAG---GG

TGAGCTGACAT-------------------CAGTGAGCGGGGTCAGG--GTCTTGG------------TGGGGCTTTGTC

CAGGGCCCCCTCGTCCCCATCCTCACGCTTCACGGCTCTTCTCGTGC------AG-GATGGCGTGAAAATGGAAGAGATC

GTGGAGGGCTGCACCGGAGCCCTCCA

>Nannospalax_galili

ATCAGGATGCCCAGCGCCATGTGGCTGCAGGTACCCAACAGCCTTACACG-GT-----GAGTGAGCTTAGTGGCAGCTGA

GATGGCATCCTTTG--------GGGGTCAGCATGTCTTAAGAG-------------------------------------

-------------------------------------TGTATGTGTGGATA-----------------GGAGGGG----G

TAAGTTGGGATTGGTGCCAACTCCAAGGACCAGTGATTTGTGTTATG--GTCATGGTTGGGGGAGA-----------GTC

CAAAGGCCACCTTTTGCCATGC------TTTATGCCTCCTCTCATGC------AG-GATGGTGTGAGGATGGAGGAGATC

GTGGAGGGCTGCACCGGAGCTCTGCA

>Jaculus_jaculus

ACCAGGATGCCCAGCGCCATGTGGCAGCAGGAACCCAACAGCCCTATACG-GT-----AAGTGAGCCTGGTGGCTGCTGC

GGTGGCTTCTGGGGAAG-----CGAGCCAGCATGTCCGCACTG-------------------------------------

-------------------------------------TCTGCGTGTGTACG-----------------AGTGGAG-----

--AGGGATGATTGGTGCCAACT--AGCGGCCTGTGGACTTTCT---GGAGTCGTGGTTGGGGAGGGGTTGTAGCTTTGTC

CAAAAGTCACCTACTCCCCTC-------TGCGTGTCCCCTCTCATGC------AG-GACGGTGTGAGGATGGAGGAGATC

GTGGAGGGCTGCACTGGAGCCCTGCA

>Castor_canadensis

ACCAGGATGCCCAGCGCCATGTGGCTGCAGGCACACAGCAGCCCTACACA-GT-----AAGTGAGCTCGGTGGTACCTGC

GACAGCCCTCCCTGACTTCCTAGGGGTCAGTGTGTCCTCAGTG-------------------------------------

-------------------------------------TGTACACGTGTCAA-----------------GGAGGAA----G

TGAGGTGCAATTGAAGCCAACTGCAAGGACTAGTGAAGTTAGTTGGGACATCATGGTGGGGGAGGGGCTATGGCCTTGTC

CAAGAGCCACCTGTTCCCATGCCAC--ATCCGTGCCTTCTGTTTCCT------AG-GATGGTGTGAGGATGGAGGAGATC

GTGGAGGGCTGCACTGGAGCATTGCA

>Cavia_porcellus

ACCAGGACGCGCAGCGCCACGTGGCTGCCGGCACGCAGCAGCCCTACACG-GT-------------------------GA

GGCCTCCCGCTCGG----------------------CTCGGCG-------------------------------------

-------------------------------------CCCTGGGGTGGG-------------------GGAGGAG-----

------GGGCCTGGCGCC--------------------------------------------------TGTGACGCAGCC

CG-----------------------------------CCCTGTGTGC------AG-GACGGCGTGCGCATGGAGGAGATC

GTGGAGGGCTGCACCGGGGCCCTGCA

>Homo_sapiens

ACCAGGATGCCCAGCGCCACGTAGCTGCAGGCACACAGCAGCCCTACACG-GT-----ATGTGAGC-TGGTGGTGCCTCT

GACAGCCTTCCTGG--------GGGGTCAGGGTGTCCTCTGTG-------------------------------------

-------------------------------------GGTGTGTGTGTGAA-----------------TGGGGAG----G

TCAGTTGCAACTGATGCCAATTCCAAGAACCTGTGAAGTTCATTCGGCTGTCATGG----GGAGGAGTTGTGGCCATGTC

CAAGG--CACCTGTCCC-------ATGCCCCCTGCCTCCTCTCACAC------AG-GATGGTGTGAGGATGGAGGAGATT

GTGGAGGGCTGCACCGGAGCACTGCA

>Bos_taurus

ACCAGGATGCCCAGCGCCATGTGGCTGCTGGCACACAGCAGCCCTACACG-GT-----AAGTGAGC-TGCTGGGGCCTGT

GACCGCCCGCCCTG--------AGAGTCTGGCTGCCCTCTGTG-------------------------------------

-------------------------------------CGAACATGTGTGCACATGAGCACGTGAC---TAGGGAG----G

CAAGTTGCCATTGAGGCAAACTCTATGGACCAGTGAGGTTTGTCAGT--GTCCTGGAAGGGG-------GTGACCACTCC

CTAGGCTCAC-TGTTGCTATAC-----CCCAATGGCTCTTCTCGTGC------AG-GATGGTGTGAGGATGGAGGAGATT

GTGGAAGGCTGCACTGGAGCCCTGCA

>Loxodonta_africana

ACCAGGACGCCCAGCGCCATGTGGCTGCGGGCACACAGCAGCCCTACACG-GT-----AAGTGAGCGGGGTGGTGCCTAT

AATAGCCCTCCCTTG-------GGAATCAGGGCGTCCTCTGTGCAAATGTGTATGTGTGCACACATGCATATGTGTTTAC

ATGTATTATGTGTGTTCGCGCATTGCATGTGTGCACATATGTGTGTGTGCACATGTATGCATGTGAGGTGGGGAG----G

GGAGTTGTGATTGATACCAACTCCAAAGAGCAGTGAGGTTCGTCAGGGTGTCATGG----GGAG--GTTATGGCCGTGTC

CACAGGCCACCTGTCCCATGCC------CTGATGCTTCCTCTGGCTTC-----AG-GATGGCGTGAGGATGGAGGAGATT

GTGGAGGGCTGCACTGGAGCACTGCA

**IL15**

>Mus_musculus

CTGAGGGCAAATTTGTTGTTGATGTGGACAAGAACATTGATATCAACGAT------------------------------

----------------------------------------------------------------------------GTGA

CGCCCAATTGTCGGGTCGCTCTAAGAAATGACAGCTACACTCTGCA

>Mus_spretus

CTGAGGGCAAATTTGTTGTTGATGTGGACAAGAACATTGATATCAACGAT------------------------------

----------------------------------------------------------------------------GTGA

CGCCCAATTGTCGGGTCGCTCTAAGAAATGACAGCTACACTCTGCA

>Rattus_norvegicus

CTGAGGGCAAATTTGTTGTTGATGTGGACAAGAACATTGATATCAATGAT-GT-----GAGTGTGGCAGGTAATATTGTG

G------GCGGGGGAGCAGCACCA--CCACCCTACATCCTGAGACTCC---CTCCC----CTCCCTCC-----AG-GTGA

CACCCAATTGTCGGGTGGCTCTAAGAAATGACAGCTACACTCTGCA

>Cricetulus_griseus

CTGAGGGCAAATTTGTTGTTGATGTGGACAAGAACATCGACATCAATGAT-GT-----AAGTGTA-CTGGTGA---TGTG

G------GGGGGCGGGGAGCACTAC----CACTGTATCCTGAACCCCCCCCCCCTCAACTCTTCATCC-----AG-GTGA

CGCCCAATTGCCGAGTTGCTCTAAGGAATGACAGCTACACTCTGCA

>Microtus_ochrogaster

CTGAGGGTAAATTTGTAGTCGATGTGGACAAGAACATTGACATCAATGAT-GT-----AAGTGCAGCTGGTGA---TGAG

G----------GGGAGCGGCACTG--CCACGCTGCATCCTGAGACTCCCT-CTGCC----CTTCATCC-----AG-GTGA

CGCCCAACTGCCGGGTTGCTCTGAGGAATGACAGCTACACTCTGCA

>Nannospalax_galili

CTGAGGGCAAATTTGTTGTTGATGTGGACAAGAACATTGACATCAATGAT-GT-----AAGTGCAGCAGGTGC---GGTT

G----GGTGGGGGGAGCAGCTCTTA-TCACACT----TCTAAAGCTC----ATCCC----TTCAATCC-----AG-GTAA

CACCCAATTGCCGGGTTGCTTTAAGAAACGACAGCTACACTCTGCA

>Jaculus_jaculus

CAGAGGGCAAATTTGTTGTTGATGTGGACAAGAACATTGACATCAATGAT-GT-----AAGTGTAGCAAGTGT---GGTG

G--------GAGGCGTTAGCTCTTACCCACATTACTTCCTGAAACTC----ACTCC----CTTCCTCT-----AG-GTGA

CACCCAATTGCCGGGTTGCTTTAAGAAATGACAGCTACACTCTGCA

>Castor_canadensis

CCGAGGGCAAGTTTGTCGTAGATGTGGACAAGAACATTGACATCAATGAT-GT-----GAGTACAGCATGTAA---GGTG

G------GGGTGGGGTCCATTCTTT-GCACACTACTTCCTAAAACTCC------------CTTCATCC-----AG-GTGA

CACCCAATTGCCGGGTGGCTCTAAGAAACGACAGCTACACTCTGCA

>Cavia_porcellus

CTGAGGGCAAGTTTGTCGTGGATGTGGACAAGAACATCGATATCAATGAT-GT-----GAGTGTAGTAGGTGA----GTG

G------GGGTTGGATCAGCTGTTG-GTGTTCCACTACCTGAAATTT----GCTGC----CTCCATCC-----AG-GTGA

CACCCAATTGCCGGGTGGCCCTAAGAAACGACAGCTATACTCTGCA

>Homo_sapiens

CTGAAGGTAAATTTGTTGTAGACGTGGACAAAAACATTGACATCAATGAT-GT-----GAGTGTAGCAGGTGA---GGTG

GTGGTGGTGGTGGGGTCAGCTCTTA-CTGTACCACT-TCTGAAACTC----GCCCC----CTTCACCC-----AG-GTGA

CACCCAATTGCCGGGTGGCTCTAAGGAATGACAGCTACACTCTGCA

>Bos_taurus

CGGAGGGCAAGTTTGTCGTCGACGTGGACAAGAACATCGACATCAATGAT-GT-----GAGTGCAGCCCGGGA---GGTG

G----GAGGTGGGGGTCAGCTCTCA-CCACACCACTTCCTGAACCTC-----TGTC----CCTTGCCC-----AG-GTGA

CACCCAATTGCCGGGTGGCCCTCAGAAATGATAGCTACACTCTGCA

>Loxodonta_africana

CTGAGGGCAAGTTTGTTGTAGATGTGGACAAGAACATCGACATCAATGAT-GT-----GAGTGTGGCAGGTGA---GGTG

G-----AGGTTAGGGTCAGCTCCCA-TTGCACCACTCTCTGAAATCCCTTTGCTCC----CCTCACCC-----AG-GTGA

CCCCCAATTGCCGGGTGGCTCTAAGAAATGACAGCTACACCCTGCA

**IL16**

>Mus_musculus

CAACAGGCAGAGAACTTGCAGCGCAAGCAGGAGCTGCGCGAGGCCCACAA------------------------------

--------------------------------------------------------------------------------

-----------------GAAGAAGAGCCTGGCAGGCATAAAGCGAG--CCCGTGCAAGGGCCGACGGTG

>Mus_spretus

CAACAGGCAGAGAACTTGCAGCGCAAGCAGGAGCTGCGCGAGGCCCACAA------------------------------

--------------------------------------------------------------------------------

-----------------GAAGAAGAGCCTGGCAGGCATAAAGCGAG--CCCGTGCAAGGGCCGACGGTG

>Rattus_norvegicus

CAACAGGCAGAGAACTTGAAGCGCAAGCAGGAACTGCGTGAGGCTCACAA-GT---------ATGCAGAGGCATG-----

--GGACAGAAAGGG-CTGGGATCCT----GGTCACCTGGGCAAGCTG--ACCCGGG-----ACAC----ACTTGTCCTCC

--------------AG-GAAGAAGAGCCTGGCAGGCATAAAGCGAG--CACGTGCAAAGGCCGATGGCG

>Cricetulus_griseus

CAGCAGGCTGAGAACTTAGAACGCAAGCGGGAACTTCGAGAAGCCCACAA-GT---------ATGCAAAGGCTTGA----

--GGGCGGAAGGTGTGTGGGA------------ACCCGAACACCCTA--ACCCGTG-----ACAC----TCTTGTCCTCC

--------------AG-GAAGAAGAGCCTGGCAGGCATGAAGCGAG--CCCGGACAAGGACAGATGGCG

>Microtus_ochrogaster

CAGCAGGCTGAGAACTTACAGCGCAAGCAGGAACTGCGCGAGGCCCACAA-GT-----AAGTATGCAAAGGCCGT-----

--GGGCAGAACG---GTGGGT--------GGGCACCTGAGCAAACCTAAACCCTTG-----TCAC----TCTTGTCCTCC

--------------AG-GAAGAAGAGCCTGGCAGGCATGAAGCGAG--CCCGGGCAGGGGCCGATGGGG

>Nannospalax_galili

CAGCAAGCTGGGAATGTGCAGCGCAAACGTGAACAACGAGAGGCACACAA-GT---------GTGCAGAGGTCTG-----

--GGCTGGAAGGTG-GGAGGT---------GTGGCCCAGGCAGCCTGA-------------CCATGGCAACCTGTTCTCC

--------------AG-GAAGAAGAGCCTGGCTGGCATGAAGCGGG--CCCGCAAAGAAGCCAATGGTG

>Jaculus_jaculus

CAGCAGGCTCTGAACGTGCAGCGCAAGCAGGAGCAGCGCCATGCCCACAA-GT---------------------------

--GGGTGCAAGGTA-GTGGGCT-------GTTCATAGGGCCTCGCCGCATTGCAGGCTGACCCACCATTCCCCTACATCC

--------------AG-GAAGAAGAGTCTGGCAGGCATGAAGCGAG--CACACAGAGAGGCTGATGGTG

>Castor_canadensis

CAGCAGGCCCAGAATGTGCAGCGCAAGCGAGAGCGCCAGGAGGCCCACAA-GT------------CAGTGGCATGACAGG

CCAGCCGGCAGGTG-GCGGGT----------------GGGTAGGCTCCTGGCTGGGGCTGACCACTGC-CCCTCTCCTGC

--------------AG-GAAGAAGAGCCTGGCAGGCATGAAGAGGT--CCCGGGCGGGGGCTGACGGGG

>Cavia_porcellus

CTGCAGGCCCAGAACGTGCAGCGCAAGCGCGAGCAGCGCGCGGCCCACCG-GT---------GCGTGGGAGCGCG-----

--G---GGTACGGG-GTGGGGAAAGGGGGAAGTTCGGGGAGGGGCCC---CCCCAGCTGCCCCGC----GCTTGCCCCCC

GGCCCCGCA-----AG-AAGAAAGAACCCTGCCGGCAAGAAAAGAGGCCCCGGGG-------GACCGGG

>Homo_sapiens

CAGCAGGCCCAGAATGTGCAGCGCAAGCAGGAGCAGCGGGAGGCCCACAG-GT-------CCAGGCAG------------

--AGCTGGGAAGGG-CAGGGCCAAGGGGGGGTCCCTGGGATGGGCGGCTATGTTGACCCCCACGC-------CCTCCTCC

--------------AG-AAAGAAGAGCCTGGAGGGCATGAAGAAGG--CACGGGT---------CGGGG

>Bos_taurus

CAGCAGGCCCAGAATGTTCGGCGCAAGCGGGAGCAGCGAGAGGCTCACAA-GT---------GTGT--------------

--GGTCACCAGGCAGGTGGGGCAG-----GGTCCCAGGTGCAGGCTGCCACATTGA--------CCGATGTCCCTCCTCC

--------------AG-GAAGAAGAGCCTGGCAGGCATGAAGCGGG--CGCGGGCAGAGGCCGATGGGG

>Loxodonta_africana

CAGCAGGCCCACAACGTGCAGCGCAAGCGGGAGCAGCGAGAGGCCCATAA-GT---------GTGTAGG-----------

--GGGCAGCGCAGG-GTGAGACAG-----GGCCCCAGGTGCACGCTGCCACACTGAGGG--ACAC----CCCCATCCTCC

--------------AG-GAAGAAGAGCCTGGCGGGCATGAAGAGGA--TGCGGGCAGAGGCTGAT-GGG

**IL17**

>Mus_musculus

CTCATGGACTTCGGCTTTCCGCAGACCACAGACAGCAAGATCCTGCAGGA------------------------------

--------------------------------------------------------------------------------

-----------------------------GTACATCACACAACAGGGCAACAAGCTGGAGACTGGCAAATCTCGTGTAC

>Mus_spretus

CTCATGGACTTCGGCTTTCCGCAGACCACAGACAGCAAGATCCTGCAGGA------------------------------

--------------------------------------------------------------------------------

-----------------------------GTACATCACGCAACAGGGCAACAAGCTGGAGACTGGCAAGTCTTGTGTAC

>Rattus_norvegicus

CTGATGGACTTCGGCTTTCCGCAGACCACGGACAGCAAGATCCTGCAGGA-GT-----GAGTGCAGGG------------

-------------GAGGTGCCGGAA--CAGGAGGCTGGCAGTCCCTCTGAGGTGTCCCTG-TGCTAGCTGCCGC------

--CCTCTCCGCTCTTTCCAAC-----AG-GTACATCACACAGCAGGGCAACAAGCTGGAGACCGGCAAGTCTCGAGTGC

>Cricetulus_griseus

CTCATGGACTTCGGCTTTCCGCAGACCACGGACAGCAAGATCCTGCAGGA-GT-----GAGTGCGGGG------------

-------------AGGGCGCCTGTGACCACGAGTC----TGGTCCCTCCAGGTGTCCCTG-ATTTAGCTGTAGA------

-GTCTCACTGTTCTTTCCAAT-----AG-GTACATCACACAACAGGGCAACAAACTGGAGACGGGCAAGTCTCGAGTGC

>Microtus_ochrogaster

CTCATGGACTTCGGCTTTCCGCAGACCACAGACAGCAAGATCCTGCAGGA-GT-----GAGTACGAGA------------

--------------AGGTGCCTGTGACCGGGAGGCT---ACTCCCTCTGAGGGGTCCCTG-GTTTAGCTGAGAC------

--CCTCACTGCTCTTCCCAAT-----AG-GTACATCACACAACAGGGCAACAAGCTGGAGACAGGCAAGTCTCGAGTAC

>Nannospalax_galili

TTGATGGACTTTGGCTTCCCGCAGACCACAGATAGCAAGATCCTGCAGGA-GT-----GAGTGGGCCA------GGGCTG

GCCCTCTAGGTTGTGCATGTGCACAACCCGGAA------AAG-----GGAGGTGTCCTTCTGTCTAACTGCTAGAAACGC

AGCCCCCCTTCAATTCCCAAC-----AG-GTACATCACACAACAGGGCAACAAGCTGGAGACAGGCAAGTCTCGGGTGC

>Jaculus_jaculus

CTCATGGACTTCGGCTTCCCCCAGACCACCGACAGCAAGATCCTGCAGGA-GT-----GAGTGCGCCC------------

------------TTGTGTGGGGGGACCCG----------GCGCCCCCTGAGGTGTGCCTGCGGCTAGCTGCTGG------

-TCCACATCGTCC-TCCTGTC-----AG-GTACATCACACAGCAAGGCAACAAGCTGGAGACGGGCAAGTCGCGAGTGC

>Castor_canadensis

CTCATGGACTTCGGCTTCCCGCAGACCACGGACAGCAAGATTCTGCAGGA-GT-----GAGTGGGTGC------------

-------------TGGGTGCAAGCGCACAGGGC------AGGGCTGGGGAGGCGTCCCTGGGTGTAGCTGCTGG------

-TGCCTGATGCTG-TCCCACC-----AG-GTACATCACGCAGCAGGGCAACAAGTTGGAGACTGGCAAGTCGCGGGTGC

>Cavia_porcellus

CTCATGGACTTCGGCTTCCCGCAGACGACAGACAGCAAGATCCTGCAGGA-GT-----GAGTGGGGCC------------

---------------CGTGGCGGGTACGGCACGGC----GGGGCGGCGGGGGGCTCCCCGGCCCCAGCTG----------

--GCCCGGTGTCC--TCCTGC-----AG-GTACATCACCCAGCAGGGCAACAAGCTGGAGACGGGCAAGTCCAGGGTGC

>Homo_sapiens

CTCATGGACTTTGGCTTCCCGCAGACCACCGACAGCAAGATCCTGCAGGA-GT-----GAGTGGACCCCTGGAGGCAGCC

ATGGGCTGGACTGTGGGTGTAAGGAACTGGAGG------AGGTCCACGGAGGTGTCCCTGGGTCCAGCTGCTTG------

-TCCCTGCCGCCC-TCCCTCC-----AG-GTACATCACTCAGCAGAGCAACAAGCTGGAGACGGGCAAGTCACGGGTGC

>Bos_taurus

CTCATGGACTTTGGCTTCCCACAGACCACAGACAGCAAAATCCTGCAGGA-GT-----GAGTGGGCTGT--GGGTCAGCC

ACAGGGTGGGCCATGGGTGGAAGAAACCTGGGG------AGGGTCAGGGAAGTATCCTTGGGCCTATCTGCTCA------

--TCTCCCTGCCCCCCCTGCC-----AG-GTACATCACGCAGCAGGGCAACAAGCTGGAGACGGGCAAGTCACGAGTGC

>Loxodonta_africana

CTCATGGACTTTGGCTTCCCACAGACCACCGACAGCAAGATCCTGCAGGA-GT-----GAGACGGCCCC--AGGGGCAGC

CATAGCTGGGCCACTGGTGGAGGGAACTCAGGG------AAGGCCAGGGAGATGTTC-TGGGACCGACTGCTCA------

-CCCCCGCTGCCCTTTGCC-------AG-GTACATCACCCAGCAGGGCAACAAGCTGGAGACGGGCAAGTCTCGAGTGC

**IL18**

>Mus_musculus

AGTCATCTCCTGTACTGTGTGCCTAGAGGAATTCCAGACACCCATCACAT------------------------------

--------------------------------------------------------------------------------

--------------------------------------------------------------------------------

--------------------------------------------------------------------------------

--------------------------------------------------------------------ACCTGTCAGAAC

CAGTGGATGTGTACAGCGACTGGATAGATGCCTGCGAG

>Mus_spretus

AGTCATCTCCTGTACTGTGTGCCTAGAGGAATTCCAGACACCCATCACAT------------------------------

--------------------------------------------------------------------------------

--------------------------------------------------------------------------------

--------------------------------------------------------------------------------

--------------------------------------------------------------------ACCTGTCAGAAC

CAGTGGATGTGTACAGCGACTGGATAGATGCCTGCGAG

>Rattus_norvegicus

AGTCATCTCCTGTACCGTGTGCCTAGAGGAATTCCAGACACCCATCACAT-GT-----ATCCTTGGGAAATTGGCTCATT

CTTGG-GGAATGAGAGAAATGGGTGGG-AGTC-GGGCTGTCCTGAC-----------CTGCCTGGGGGCTGGTGACCGGA

AA-CAGTGAAC--ATGGTCA-CTCCTGCAGCCCTGGCCTT--------------------------GTGGCCATCTAGGG

AAATTGATATCGGCTACTGGTTTAACACTGAGCG-ACAAGGCATAGGGCAGGGGTCCAATGGACCC-CATC----ATAGC

AGAGATGT--GCCTGACAAGGGGCTTCATTGCCACAAATTATCCTTGACCC---TGCTCC-----AG-ACCTGTCAGAAC

CCGTGGATGTGTACAGCGACTGGATAGACGCCTGCGAG

>Cricetulus_griseus

AGTTATCTCCTGTACCGTGTGCCTAGAGGAATTCCAGACACCCATCACAT-GT-----ATCCTTGGAAAGTCATCTGATT

CCTAG-AGAATGAGAGAAGTGGGTGGG-AGTTGGGACTGTCTTTAC-----------CTGCTCAGGGACTGGTGACCAAA

GA-CAAGGAACTGTCAGTCC-CTCCTGCTGCCCTGCTCCT------GTGGGCAGTTATGGAGC--CACTGCTACC-----

---------TTGTCTACTGGCTTAACACTAAATG-ACAAGGCACATGGCAGGGGTCCAATTGACCC-TGTCATAAATAGC

ATAAATGT--GCCCAGGAGAGGGCTTCATTGCTAGAAATCATCCTTGACTCT-GTGTTGC-----AG-ATCTGTCAGAAC

CAGTGGATGTGTACAGCGATTGGATAGACGCCTGTGAA

>Microtus_ochrogaster

AGTTATCTCCTGCACCGTGTGCCTAGAGGAGTTCCAGACACCCATTACGT-GT-----ATCCTTATAAAGTCAGCTGATG

TCTGG-GAAATCAGAGAAGGGGGTGGG-AGTCGTGGCTACCCTGAC-----------CTGCTCAAGGGCTGGTGACCAAA

GA-CAAGGAACTGTCAGTCA-CTCCTGCT---CTGGCCCT------GTGGCCAGGGGTGGAGC--CGCTGCCACCTAGGA

GAATGGACATTGTCTGCTGAGGTAACACTAAGTG-ACAAGGCACAGGGCAGGGGTCCGACTGGCTC-TGTC----ATAGC

AGAAA--T--GTGCAGGAGGGGGCTTCACTGCCACAAATCGTCCTTGACCT--GTGTTTC-----AG-ATCTGTCAGAAC

CAGTGGATGTGTACAGCGATTGGATAGATGCCTGTGAG

>Nannospalax_galili

AGTCATCTCCTGTACCGTGTGCCTAGAGGAATTCCAAACACCCATCACGT-GT-----ATCCTTGGAAAATTATTTGATC

TCTTG-AACGTGAGAGAAGGGGTTGGG-AGCTGGGGCTGCCCTGGC-----------CTG-TCAAGGGCACTCAGT----

---CAAGGAGCTGCTGTTCC-TTACTGCTGCTCTGGCCCTGGTCAGGTGGCCAGATGTGGCAT--CACTGCTACCCACAA

GAAT-GGCACTGCCTTCTGACTG-ACACTGAGTG-ACAAGGTGCAGGG--------------------------------

------------------GAGGGGTTCATTGCTACAGATGGCCCTTGACCTGAGTGTTTC-----AG-ATCTGTCAGAAC

CAGTGGATGTGTACAGCGATTGGATAGATGCCTGTGAG

>Jaculus_jaculus

AGTCATCTCTTGTACCGTGTGCCTCGAGGAATTCCAGACCCCAATCACAT-GT-----ATCCTTGGGAAAACAGTCTTTT

TCTGG-GGAGTAAGAGAAGGGCTAGTG-GATGAGGACTGCCTAACCATGG---TGGGCTGCTCAAGGGCACTTGGCCATG

GT-CCAGGGACCGGAGTTCA-TCCCTGCACCTCTGGCCCT-GTCAGATGGCCTGGT---------CACTGTCACCTAGGG

GAATTAGCACCTCCAACTGACTT-ACAAGGGGTG-ACAAGATGTGGG--CGGTGTCTGCTTGACACTTAGCATGAACAGC

AGAAATTG--GTACAAGGGAGGGATTCATTACCACAAATCAACCTTGACCTCCATGTTTC-----AG-ATCTATCAGAAC

CAGTGGATGTGTACAGCGATTGGATAGATGCCTGTGAG

>Castor_canadensis

AGTCATCTCTTGTACCGTGTGCCTAGAGGAATTCCAGACGCCCATCACAT-GT-----ATCCTTGGAAAA--------TC

CCCAG-AG--TGGAAGAGGGACTGGGATAGTCAGGGCTGCCCTGTTCAGG--GTAGGTGGCTCAAGGGGATCTGGCCAAG

GGCAAAGAGGTTGAAGTTCA-TCTCTGCTCACTTGTCCCT-ACT--ATACTCTGGTGC-------CATTTCCATGCAGTG

AAAAGAGTGCCATCTAGTGATTT-ACATGGGGTG-ATAAGGTGCAAGGTATGGGTCTGGCAGACAC-TGATGTGATCCAC

AGAGACCG--GTTCAGAGAAGGGATCCA-TGCCATCAGTCATCCTTGACCTCAGTGGCTC-----AG-ATCTGTCAGAAC

CAGTGGATGTGTACAGCGATTGGATAGATGCCTGTGAA

>Cavia_porcellus

AGTCATTTCCTGTACTGTGTGCCTAGAGGAATTCCAGACGCCTATCACTT-GT-----ATCCTTGGATAATCGGGC--TT

CTTAGTGGGATGGGAGAGCAGGTCTGGTGGTCAGGGCTGGC----------------CTGGTCAAGAG------------

---GAGGGGGCTG-------------------------------------------------------------------

------------------GACACCATATTGTATG-CTTTGGTACA-GTCACGTGCCT-----------------------

----------GTCAAGGGAGGGGTCCAGTTGCCACCAATCACCCTTGACTTCAGCGCCTC-----AG-ATCTCTCAGAAC

CCGTGGATGTGTACAGCGATTGGATAGACGCCTGCGAG

>Homo_sapiens

AGTCATCTCTTGTACCGTGTGCCTAGAGGAATTCCAGACGCCCATAACGT-GT-----ATCCTTGGAAACCTGGGCTTTT

TCCAG-AGGGTGGG------------------------------------------------------------------

---GAGGGGGCTGGAGTCCGGACCCTGCTCATCTGGCCC--ACTGTGTGCCCTGGTGCAGGGC--CAAAGCCGTCCAGAG

GAACAGGTGCCACCTAGTGATTT-CTGTGGGGTG-AGAAGATGCAGGGC-------------------------------

-------------------AGGGTTCCAATGCCAATGATCGCCCTTGACCTAAGTGGCCC-----AG-ATCTGTCAGAAC

CCGTGGATGTGTACAGTGATTGGATAGACGCCTGCGAG

>Bos_taurus

AGTCATCTCTTGTACCGTGTGCCTAGAGGAATTCCAGACGCCCATCACTT-GT-----ATCCTTGGGAATCCGGGCTTTT

TCCAG-GAGATGGG--------TTGGGGGTTCTGGGCGGCCCCAAG-------TGGGCTGCTCGAGGACA----------

-------------------------------CCCAGCCCT-GCAGCGTGCCCTGGGGG-------CATGGCCACGGAGAG

GAACCAGCGCCACGGGCTGACTT-ACGTGGTGTGAACGGGGTTCAGGGCAGTGGTCTGGCTAACAG-TGGCGTGAGCTAC

AGAAAAGTAAATGTGGGAAAGGGGTCCAGTGCTACCAGTTGCCCTTGACTGCAGCGGCTC-----AG-ATCTGTCAGAAC

CAGTGGACGTGTACAGCGATTGGATAGATGCCTGCGAG

>Loxodonta_africana

AGTCATCTCTTGTACTGTGTGCCTAGAGGAATTCCAGACGCCCATCACAT-GT-----ATCCTTGGAAAACCAGGC--TT

TCCAG-TGGGTGGA------GGTGGGGTGGTCAGGGCTGCCTTGCCCAGGACATACACTGCTCAAGGGCACCTGCCCACA

GGTGAGGGGGCTGGAGTGCAACCCTTGCTCTGTTGGCTCT-GCTGGGTGCCCTGGTACAGAGCTGCATTGCC--------

-CATGGATGCCTTCTCTTGACTT-GCATGGGGTG-ACAGGGTGCAGGACAGGGGTCAGGCTGACAC-TGGTGTGAACAGC

AGAGGCCT--GTGTGGGAAAGGGGTCCAATGCCACCAGATGCCCTTGACCTCAGCGGCTC-----AG-ATCTCTCAGAAC

CAGTGGACGTATACAGCGATTGGATAGATGCCTGTGAG

**IL19**

>Mus_musculus

TGCTCCTCTGCATTGGCGCCTCAGTAATGTCCATTCTGCCCAAGATCCAG------------------------------

--------------------------------------------------------------------------------

--------------------------------------------------------------------------------

--------------------------------------------------------------------------------

--------------------------------------------------------------------------------

--------------------------------------------------------------------------------

--------------------------------------------------------------------------------

--------------------------------------------------------------------------------

--------------------------------------------------------------------------------

--------------------------------------------------------------------------------

--------------------------------------------------------------------------------

--------------------------------------------------------------------------------

------------------GAATCACAACCAAGGTCTGGCTTGTTACAGTCGTCAGTAATTACAGTCTA

>Mus_spretus

TGCTCCTCTGCATTGGCGCCTCAGTAATGTCCATTCTGCCCAAGATCCAG------------------------------

--------------------------------------------------------------------------------

--------------------------------------------------------------------------------

--------------------------------------------------------------------------------

--------------------------------------------------------------------------------

--------------------------------------------------------------------------------

--------------------------------------------------------------------------------

--------------------------------------------------------------------------------

--------------------------------------------------------------------------------

--------------------------------------------------------------------------------

--------------------------------------------------------------------------------

--------------------------------------------------------------------------------

------------------GAATCACAACCAAGGTCTGGCTTGTTACAGTCGTCAGTAATTACAGTCTA

>Rattus_norvegicus

TGCTGCTCTGCATCGGCGCGTCTGTAATGTCCATTCTGCCCAAGATCCAG-GT-----ATGCACTGCCTACCACGCTTTT

TTTATACTATACTCACCCAGCCAGCTGCTCAGAAAACAAGGCGTTCATCAGTGTCAACATGCTGCTCTGCATCGGCGCGT

CTGTAATGTCCATTCTGCCCAAGATCCAGGTATGCACTGCCTACCACGCTTTTTTTTTGTTTTTCATCTTTATTAACTTG

GATATTTCTTATTTACATTTTCATTGTTATTCCCTTTCCCGGTTTCCAGGCCAACATCCCCCTAATCCCTCCCCCTCCGC

TTCTCTATGGGTGTTCCTCTCCCCATCTTCCCCCCATTGCCACCCTCCCCCCAACAATCTAGCTCACTGGGAGTTCAGTC

TTAGCAGGACCCAGGGCTTCCCCTTCCACTGGTGCTCTTAACGAGGCTATTCATTGCTATCTATGAGGTCAGAGTCCAGG

GTCATTCCATGTATAGTCTTTAGGTAGTGGCTTAGTCCCTGGAAGCTCTGGTTGCTTGGCGTTGTTGTACATATGGGGTC

TCGAGCCCCTTCAAGCTCTTCCAGTTCTTTCTCTGATTCCTTCAACGGGGGTCCTATTCTCAGTTCAGAGGTTTGCTGCT

GGCATTCGCCTCTGTATTTGCTGTATTCTGGCTGTCTCTCTCAGGAAAGACCTACATCCGGCTCCTGTCTGCCTGCACTT

CTTTGCTTCATCCATCTTATCTAGTTTTTTTTGGCTGTATATGTATGGGCCACACGTGGGGCAGGCTCTGAATGGGTGTT

CCTTCTGCCTATGTTCTAAAATTTGCCTCCCTATTCCCTCCCAAGCTACCACTCGTTT-----TTATAGATCCTTTA-CT

TTCTAAACTTTCACAAATC----AGAATGTCAGA-TTTTTATCTGCATTGCTTAATAT----------------------

-TTTCTTTGT-----AG-GAATCACAACCAAGATCTGGCTTGTTACAGTCTTCAGTAATTACAATCTA

>Cricetulus_griseus

TGTTGCTCTGCATTGGTGCTTCCGTAATGTCTATACTGCCCAAGATCCAA-GT-----ACGTACT---------------

--------------------------------------------------------------------------------

--------------------------------------------------------------------------------

--------------------------------------------------------------------------------

--------------------------------------------------------------------------------

--------------------------------------------------------------------------------

--------------------------------------------------------------------------------

--------------------------------------------------------------------------------

--------------------------------------------------------------------------------

--------------------------------------------------------------------------------

-------------------------------------------AACCAGCACTCAGGT-----GTTTGAAGCCTTTAACT

A--TAACTTTTCATCAATC----GGAATGTCAGA-TATTTATTTTTATTACTTAATAT----------------------

-TCTGTTTGT-----AG-GAATCACAACCAAGATCTGGCTTGTTACAGTCTTCAGTAATTACAGTCTA

>Microtus_ochrogaster

TGCTCCTCTGCATTGGTGCTTCTGTGATGTCTATACTGCCCAAGATCCAG-GT-----ATGCACT---------------

--------------------------------------------------------------------------------

--------------------------------------------------------------------------------

--------------------------------------------------------------------------------

--------------------------------------------------------------------------------

--------------------------------------------------------------------------------

--------------------------------------------------------------------------------

--------------------------------------------------------------------------------

--------------------------------------------------------------------------------

--------------------------------------------------------------------------------

-----------------------------------------------------CATTT-----CTATGAAGCCTTTAACT

TTCTAAATTTTCATAAAAC----AGAAAGTCAGA-TATTTATTTACATTACTTCATAT----------------------

-TTTGTTTGT-----AG-GAATCACAACCAAGATCTGGCTTGTTACAATCTTCAGTAATTACAGTCTA

>Nannospalax_galili

TGCTTCTCTGCATCGGTGCTTCTATCATGTCCATACTGCCGAAAATCCAA-GT-----ATGCACT---------------

--------------------------------------------------------------------------------

--------------------------------------------------------------------------------

--------------------------------------------------------------------------------

--------------------------------------------------------------------------------

--------------------------------------------------------------------------------

--------------------------------------------------------------------------------

--------------------------------------------------------------------------------

--------------------------------------------------------------------------------

--------------------------------------------------------------------------------

-------------------------------------------TCCAAGCACTAGTTA-----TTATGAATGGCTTACCT

TTCCAGATTTCCATAAATCATGAATAATGCCAGA-TACTTATCTGCATT----AATAT----------------------

-TTTGTTTAC-----AG-GAATCACAACCAAGATCTGGCTTATTACAGTCTTCAGTAATTACAGTCTA

>Jaculus_jaculus_

TGCTCCTTTGCCTCGGCGCATCTGTCATGTCTATTCTTCCAAAAATCCAA-GT-----GAGCTTT---------------

--------------------------------------------------------------------------------

--------------------------------------------------------------------------------

--------------------------------------------------------------------------------

--------------------------------------------------------------------------------

--------------------------------------------------------------------------------

--------------------------------------------------------------------------------

--------------------------------------------------------------------------------

--------------------------------------------------------------------------------

--------------------------------------------------------------------------------

-------------------------------------------TGACAGCACTACTTT-----CCATGAAGCCTATACCT

ATCTCAACTCTCAAAAATCCTTAATGATGT-----TATTTATCTATGTATCTCAATG-----------------------

-TTTGTTTGC-----AG-GAGTCACAGCCAAGGTCTGGTTTGCTACAGTCTTCAGTAATTACAGTCTA

>Castor_canadensis

TGCTCCTCTGCATTGGTGCTTCTGTAATGTCTATACTGCCAAAAATCCAA-GT-----ATGTTCT---------------

--------------------------------------------------------------------------------

--------------------------------------------------------------------------------

--------------------------------------------------------------------------------

--------------------------------------------------------------------------------

--------------------------------------------------------------------------------

--------------------------------------------------------------------------------

--------------------------------------------------------------------------------

--------------------------------------------------------------------------------

--------------------------------------------------------------------------------

-------------------------------------------TCATAGCACTAGTTT-----TTATGAAG-TTTTACCT

TTCTCAGTTTTCATAAATCTTGAATGATGTCAGAATATATACCTATGTTTCTTAATCTTAATAT----------------

-TTTGTCTGT-----AG-GAGTCACAACCAAGATCTGGTTTGTTACAGTCTTCAGTAATTACAGTCTA

>Cavia_porcellus

TGCTGCTCTGCGTCGGGGCCTCTGTGATGTCCATACTGCCACGGATCCAG-GT-----ACGCATG---------------

--------------------------------------------------------------------------------

--------------------------------------------------------------------------------

--------------------------------------------------------------------------------

--------------------------------------------------------------------------------

--------------------------------------------------------------------------------

--------------------------------------------------------------------------------

--------------------------------------------------------------------------------

--------------------------------------------------------------------------------

--------------------------------------------------------------------------------

------------------------------------------------------------------------GCGTCGCC

TGCTCAGCTCTCACACCTCGTCAGCAGTGCTGCTGTATTGATTTGTGTTGCTTCCTGT----------------------

-TTTGCTTGT-----AG-GAGTCACAGCCGAGATCTGGTTTGTTACAGTCTTCAGTAATCACAGTCTA

>Homo_sapiens

TGCTCCTCTGCGTTGGTGCTTCTGTAATGTCTATACTGCCAAAAATCCAA-GT-----ATGCCCT---------------

--------------------------------------------------------------------------------

--------------------------------------------------------------------------------

--------------------------------------------------------------------------------

--------------------------------------------------------------------------------

--------------------------------------------------------------------------------

--------------------------------------------------------------------------------

--------------------------------------------------------------------------------

--------------------------------------------------------------------------------

--------------------------------------------------------------------------------

-------------------------------------------TTAAAGCATTAGTTT-----TTATGAAGCTTATACCT

TTTTAAGTTTTCAAAAATCTAGAATGATGTCAGACTATTTACCTGTGTTGCTATATATATATATATATATTTTTTTTTTT

TTTTTTTTGT-----AG-GAATCACAACCAAGATCTGGTTTGTTACAGTCTTCAGTAATTACAGTCTA

>Bos_taurus

TGCTCCTCTGCCTTGGTGCCTCTATAATGTCCATACTGCCAAAAATCCAA-GT-----AAGCTTG---------------

--------------------------------------------------------------------------------

--------------------------------------------------------------------------------

--------------------------------------------------------------------------------

--------------------------------------------------------------------------------

--------------------------------------------------------------------------------

--------------------------------------------------------------------------------

--------------------------------------------------------------------------------

--------------------------------------------------------------------------------

--------------------------------------------------------------------------------

-------------------------------------------------GATTAGTTCATTCGTTATGAAGCTTCTGTTT

TCCTAAGGTTTCCTAAATCTTGAATGATCGCAG--TATTT--TTGTTTTGCCTA--------------------------

-TTTTTTTGT-----AG-GAATCACAACCAAGATCTGGTTTGTTACAGTCTTCAGTGATTACAGTCTA

>Loxodonta_africana

TGCTCCTCTGCATTGGTGCTTCTGTGATGTCTATCCTGCCCAAAATCCAA-GT-----ATGCTCT---------------

--------------------------------------------------------------------------------

--------------------------------------------------------------------------------

--------------------------------------------------------------------------------

--------------------------------------------------------------------------------

--------------------------------------------------------------------------------

--------------------------------------------------------------------------------

--------------------------------------------------------------------------------

--------------------------------------------------------------------------------

--------------------------------------------------------------------------------

-------------------------------------------TTATATAGTTAGTTTTT---TTTTGAAGCCTCTATGT

TTGTAAATTTTTATAAATCTTAAATGATGGCAGAATATTTATCTGTGTTGCTTAATT-----------------------

-TTTTTCTGT-----AG-GAGTCACAACCAAGATCTGGTTTGTTACAGTCTTCGGTAATTACAGTCTA

**IL20**

>Mus_musculus

GAGACTGAGCATCACAATGGGATTGCGGAGCTGCTGGAGATCCTGGGCAG------------------------------

--------------------------------------------------------------------------------

----------------CATCATCAATGGCTTTGCCTTGCCCCTTAAGGAAGAACACAAGGTGTTTC

>Mus_spretus

GAGACTGAGCATCACAATGGGATTGCGGAGCTGCTGGAGATCCTGGGCAG------------------------------

--------------------------------------------------------------------------------

----------------CATCATCAATGGCTTTGCCTTGCCCCTTAAGGAAGAACACAAGGTGTTTC

>Rattus_norvegicus

GAGACTGAGCATCACAATGGCATTGCTGAGCTCCTGGAGATCCTCGGCAG-GT-------------CAGTGGGCAGTGGG

ATGCC-ACGGGAGATGGGACGG-----------GCCCTCAATTCCCACGTTAGCCCGTGGTCCTAAAGACGCACGCCCTT

TGACTTCT-----AG-CATCATCAATGGCTTTGCCTTGCCCCTTAAGGAAGAGCACAAGATGTTTC

>Cricetulus_griseus

GAGACTGAACATCATAATGGGATTGCTGAGCTCCTGGAGATCCTGGGCAG-GT-----GAGTGAGTGG---GGAGTGCAG

ATGCCACTGAATGCTGGGGGAG--------GGCACACTG--------TATAAGCCTTTGGTCCTAA-AA---ACACCCCT

TGGCTTCT-----AG-CATCATCAATGGCTTTGCCTTGCCCCTTAAGGAAGAGCACAAGATGTTTC

>Microtus_ochrogaster

GAGACTGAACATCACAATGGGATTGCCGAACTCCTGGAGATCCTCGGCAG-GT-----GAGTGG-------GGAATGCAG

ATGCC-ATGGAAGATTGGGGG------ATGTGTACACTGGGCTTGAGCATAAGCCTTTGGTCCTAA-AA---ATGTCCCT

TGACTTCT-----AG-CATCATCAATGGCTTTGCCTTGCCCCTTAAGGAAGAGCACAAGATGTTTC

>Nannospalax_galili

GAGACAGAACACCACAATGGGATCGCTGAGCTCCTGGAAATCCTGGGCAG-GT-----GAGAGGTCGGGTAGGGGCAGAG

ATACCTGCAGAAGGTTGGAGG------ATTGGTACACTAAGCTTGGATCTTGGCTTTTGGTCCTAA-AA---ACTTTCCT

TAATTTCT-----AG-CATCATCAATGGTTTTGCCCTGCCCCTTAAGGAAGAGCACAAGATGTTTC

>Jaculus_jaculus

GAGACAGAACATCACAATGGGATTGCTGAGCTCTTGGAGATCCTGGGCAG-GT-----GAGAGGCAGGGTGGAGAGAGAC

ACACCTGGATGAGGTTGGCAAG-----ATTGGTTC-CTAATCTTAGAT-CGGCCTATTGGTCCTAA-AA---GTTTCCCT

TAACCCCT-----AG-CATCATCAATGGCTTTGCCTTGCCCCTTAAGGAAGAGCACAAGATGTTTC

>Castor_canadensis

GAAACAGAACATCACAATGGAATTGCTGAGCTCCTGGAGATCCTGGGCAG-GT-----GAGAGGTGGGGTGGGGGCACAG

GCGCTTGGAAAGGTTTGCAGG------ATTGGTACATTGGGGTTGTCCGTGTCCCTTCGGTCCTAA-AA---CCCTCCTT

TAACTCAC-----AG-TATCATCAATGGCTTTGCCTTGCCTCTTAAGGAAGAGCACAAGATGTTTC

>Cavia_porcellus

GAGACGGAGCACCACAATGGGATTGCAGAGCTCCTGGAGATCCTGGGCAG-GT-----GAGAGGTGGGGT-GGGGTCGAG

ATGTCTGAGAAAGATCAGGGGC-----CTCGGTGCCTTGAACCTGGGTCTGGCATTCTGGCCCTAA-AA---CCTTCCCT

TAACTCCT-----AG-TATCATCAATGGCTTTGCCCTGCCCCTCAAAGAGGAGCACAAGATGTTCC

>Homo_sapiens

GAGACGGAGCATCACAACGGGATTGCTGAGCTCCTGGAGATCCTGGGCAG-GT-----GAGAGGCCGGGTGGGGGCACAG

ATGCCTGAAAAAGGTTGGCAGG-----ATTGGTGTACTGAACTTGGATCTGACCCTCTGGTCCTAACAA---ATGTCCCT

TAATTCCT-----AG-CATCATCAATGGCTTTGCCCTGCCCCTTAAAGAAGAGCACAAGATGTTCC

>Bos_taurus

GAGACAGAGCATCACAATGGGATTGCTGAGCTCCTGGAGATCCTGGGCAG-GT-----GAGAGGCGGGGCGGGGGCACAC

AGGTCTGGACAAGGTCGGGCAGGGGTAGCAGGTGCCTTGAGCTTGGACATGGCCCTTTGGTCCTAACAA---CCCTCCTT

TCCCTCCC-----AG-CATCATCAATGGCTTTGCCTTGCCCCTGAAGGAAGAGCACAAAATGTTCC

>Loxodonta_africana

GAGACGGAGCACCACAATGGGATTGCTGAGCTCCTGGAGATCCTGGGCAG-GT-----GAGAGGTGGAGTGGGGGCAGAG

GTGCCTGACAAAGATTGGGAGG-----ACTGG--------------------CCCTTTGGTCCTCACAA---ACGTCCCT

TAACTCCC-----AG-CATCATCAATGGCTTTGCCCTGCCCCTTAAAGAAGAGCACAAAATGTTCC

**IL21**

>Mus_musculus

ACTCTGAGCTGCTGCACATGCTGGAGTCCCCCGAGTCCCTCCGCTCCAAG------------------------------

--------------------------------------------------------------------------------

--------------------------------------------------------------------------------

--------------------------------------------------------------------------------

--------------------------------------------------------------------------------

--------------------------------------------------------------------------------

--------------------------------------------------------------------------------

--------------------------------------------------------------------------------

--------------------------------------------------------------------------------

--------------GTAGATGAAGCGGTGGCAGTCCTGCAGGCTCACCATGCCAAGAAAGAAGC

>Mus_spretus

ACTCTGAGCTGCTGCACATGCTGGAGTCCCCCGAGTCCCTCCGCTCCAAG------------------------------

--------------------------------------------------------------------------------

--------------------------------------------------------------------------------

--------------------------------------------------------------------------------

--------------------------------------------------------------------------------

--------------------------------------------------------------------------------

--------------------------------------------------------------------------------

--------------------------------------------------------------------------------

--------------------------------------------------------------------------------

--------------GTGGATGAAGCTGTGGCAGTCCTGCAGGCTCACCATGCCAAGAAAGAAGC

>Rattus_norvegicus

ACTCTGAGCTGCTCCACATGCTGGAGTCCCCCGAGTCCCTCCGTTCCAAG-GT-----GAGCTGCCTTTCAAGACCCTGT

GACATCACGG--TTTAGCTTCAGGGAATGAGCTTGGGGG----------------------CCGTCCAGA----------

------------------GAGAAAGGTCTGTGGCCC--------------------------------------------

--------------------------------------------------------------------------------

---------------------------CCATGGCCA--------------------------------------------

--------------------------------------------------------------------------------

-------------------------------------------CCCATGTCTG--ATTTGAGCTACTGCTAAAGTTGTTG

AAGAGATAGCACCAGGAGGAGCCCGCCTGGGGGATC-----------TTCTACTCATTGACCACGT-------------C

TGTGTGCCAGGAGAGACAAGTGGGTCACTGAGCACCTGGGGTGGCTCCCCT---CAGTCTCTGAACATCTGGGCGT---C

TTCCAC-----AG-GTGGATGAAGCTGTGGCAGTCCTGCAGGCTCATCATGCCAAGAAAGAAGC

>Cricetulus_griseus

ACTCTGAGCTGCTCCACATGTTGGAGTCCCCTGAGTCTCTCCGTTCCAAG-GT-----GAGCTGCTTTTCGGGCCCTGTG

A----------------CATCAGGGAATGGGG----GTGGGGTGCTTAGA-----------ATGCTCAGG----------

-----TCTGGTCTGTTTAGGCAAAGGTCTGCTGCTC--------------------------------------------

--------------------------------------------------------------------------------

---------------------------CTGTGACCC--------------------------------------------

--------------------------------------------------------------------------------

---------------------------------CTCTCATTCATGCCTGTCTG--TTCTGGCCTACTGCTGAAG------

--------ACAGCGGAAGAGGCC--TGGGGATC--------------CCTTGCTCATCCACTAGGT-------------C

TGGATGGTGGG------------------GAGAGA-----------------------CACTGGGCACCCGGGGT----C

TTTTGC-----AG-GTGGATGAAGCTGTGGCAGTCCTGCAGGCTCATCATGCCAAGAAAGAAGC

>Microtus_ochrogaster

ACTCGGAGCTGCTCCACATGCTGGAGTCCCCCGAGTCTCTCCGTTCCAAG-GT-----GGGCTGCCCTTCAGGC------

------------CGTGACTTCAGGGAATGGGCTTTGGGGGTGTTTGGCGA-----------TTGCTAGGG----------

----------------------------TCTTGTCC--------------------------------------------

--------------------------------------------------------------------------------

---------------------------CTGTGACCC--------------------------------------------

--------------------------------------------------------------------------------

-------------------------------------CTCTGCCTCATCTGTG--ATGTGGGCTACTGCTGAAGGTGAC-

-------A------------------------------------------------------------------------

-------CAGG------------------GAGAGG-CAG-GTGGCCCTCCT---CCGTCACTGGC-----ACGGGT---C

TTTCAC-----AG-GTGGATGAAGCTGTGGCAGTCCTGCAGGCTCATCATGCCAAGAAAGAAGC

>Nannospalax_galili

ACTCGGAGCTGCTGCACATGCTGGAGTCCCCCGAGTCTCTCCGTTCCAAG-GT-----GAGCTG-TTCTAAGATCCTGTG

G-CTTCAGAG--CTCAGTTTGGGAGACTGGTCA---GAGGAGGGGGTTGG-----------TCACCCAGG----------

-----------CCGGACAGAGAAGGATCTGTTGCTT--------------------------------------------

--------------------------------------------------------------------------------

---------------------------CCATGACCT--------------------------------------------

--------------------------------------------------------------------------------

----------------------------------------GTGCTTTAATCTG--ACTTGGGCTGCTGCTGAAGGTATT-

----------------------------------------GGGAAAGCTCTTGGCACCTTCCAGGGACCTTCTAATCCAC

TGGGTGTCAGG------------------GATAGG-CAG-GTAGCTCTCCC--GGAGTCACTAACTAC-TGGACGT---T

TCTCAC-----AG-GTGGATGAAGCTGTGGCAGTTCTGCAGGCTCATCATGCCAAGAAAGAAGC

>Jaculus_jaculus

ACTCGGAGCTGCTGCACATGCTGGAGTCCCCAGAGTCTCTCCGCTCCAAG-GT-----GCGC------------------

------------------CTGGGAGA----------GGGAGGGGCAGAGG-----------ACGC---------------

-------------------------GGCTGCTGTCC--------------------------------------------

--------------------------------------------------------------------------------

---------------------------CTGTGACCT--------------------------------------------

--------------------------------------------------------------------------------

---------------------------------------CACCCTCTGGTCTA---CCAGGGCTGCTGCTGAGGGCGGC-

-------ACAAC--------------------------------------------------------------------

------TCAGG-------------------------------CGCTCTCCT----GGTCGCTGAC---CTGGGTTTCTCT

TCTCAC-----AG-GTGGATGAAGCTGTAGCAGTTCTGCAGGCTCATCATGCCAAGAAAGAAGC

>Castor_canadensis

ACTCAGAGCTGTTGCACATGCTTGAGTCCCCCGAGTCTCTCCGCTCCAAG-GT-----AAGC-ACTTCTCAGAGCCTATG

G-----------CTTTGCCCCTCAGCTGG--------------------------------ACACCCAGG----------

-----------TGAGGCAGAGATAAGTCTGCTGTAT--------------------------------------------

--------------------------------------------------------------------------------

---------------------------CTGGGACTG--------------------------------------------

--------------------------------------------------------------------------------

--------------------------------------------------CCA--TTTTGGGTTATTGGGAGTGCTATC-

-------AGCAC--------------------------------------------------------------------

-------TAGG------------------GAGTGG-CAG-GCAGCTCTCCT---CAGTCACTGAC-----AAGGTT---T

TCTCAC-----AG-GTGGACGAAGCTGTGGCAGTTCTGCAGGCTCATCATGCCAAGAAAGAAGC

>Cavia_porcellus

ACTCAGAACTGCTGCACATGCTCGAGTCCCCTGAGTCTCTGCGCTCAAAG-GT-----GAGCTGCTGCTCAGAGCTTGCA

G-TGACAGCT--CTCGGCTCGGGAGGGTG---------GAGGGGGCCTGG-----------ACACTGGGT----------

----------CCAGCAGAGAGGATATTCTGCCACCT---------------------------TATTCCTCTCA------

-------------------TGCCTTAC-----------------------------------------------------

---------------------------TTGTGATTG--------------------------------------------

--------------------------------------------------------------------------------

--------------------------------------------ATGCTGCTA--GTGTGGGT-GCTGAGACGTCTGTC-

-------AGCAGAGGC------------------------------------------CACTGGGC-------------C

TGGGTATCGGG------------------GAGGGACCTG--GTGCTCTCCT---GAGTCACTGACTGCGTGGCGGA---T

TCTCCC-----AG-GTGGATGAAGCTGTGGCAGTTCTACAGGCTCATCATGCCAAGAAAGAAGC

>Homo_sapiens

ACTCTGAGCTGCTGCACATGTTAGAGTCCCCCGAGTCTCTCCGCTCCAAG-GT-----GAGCTGGGGCTCAGACCCTGCA

G-CTTCAGTT--CTCAGCTTGGGAAGACT-------GGGGGCAAACTTGG-----------ATGCCCAGG----------

---------TGCAGCAGAAAGTGGGATCTGCTGCCC--------------------CCAGGACCCCTCTCGTCA------

-------------------TGCCTTGA-----------------------------------------------------

---------------------------CTGTGACTG--------------------------------------------

--------------------------------------------------------------------------------

----------------------------------------------GAGGCTG--CAGTGGGTATTTGGGAAAGTAGTT-

-------AGCACCAGAAG-----CCTAGGGATCATCTGTACAGTTGGCTTTGGTCCACCACTAGGT-------------C

TGGGCACTGGG------------------GAGGGGTGGA-GTAGCTCTCCT--AGATTCACTGACCACCTGAAGAT---T

TCTCGC-----AG-GTGGATGAAGCTGTAGCAGTTCTACAGGCTCATCATGCCAAGAAAGAAGC

>Bos_taurus

ACTCAGAGCTGCTGCACATGCTGGAGTCCCCCGAGTCTCTCCGCTCCAAG-GT-----GAGCGGGTTCTCAGATCCTCTG

G-CCTCTGCTCACTGGGTTCAGGAGGACG-------AGGGGCGGCCGTGA-----------ACACCCAGG----------

---------AGTGGCAGAGAGAAGAGTCTGCTACCC--------------------CCATGACCACTTCCTTGG------

-------------------TGCCTCAC-----------------------------------------------------

---------------------------CTGTGACCT--------------------------------------------

--------------------------------------------------------------------------------

------------------------------------------AAGTACTGCTGGGTTGTGGGGATCTGGGAAAGTGGTC-

-------AGCACCAGGAAATGCC----------------------------------CCACGGGGC-------------C

TGG-CTCCAGG------------------GAGGGG-CAGAGGAGCTCTCCTCAGATGTCACTGACCACCTGGACAT---T

TCTCAC-----AG-GTGGATGAGGCTGTGGCGGTCCTTCAGGCTCATCATGCCAAGAAAGAAGC

>Loxodonta_africana

ACTCTGAGCTTCTGCACATGCTGGAGTCTCCTGAATCTCTCCGCTCCAAG-GT-----GAGCTGGTGCTTGGG--CTCAG

GGCTTTAGCTGGCCCAGCTCAGGATGAGGGACACCCAGGGGCGGAAGTGAGAAGACTCCTCATGCCTAGTGATTTCGGGC

CTGCTTCACAGTGGCTAAGTGATATGGCTGCTAATCAAAAGATTAGCAGTTTGAATCCACCAGCTGCTCCCTGGAAACTC

TATAGGGCAGTTCTACTCTTGTCTTATAGGGTTGCTATGGGTTGGAATCTACTGAACAGCGGTGGGCTTGGTTTGGTTTT

CTGTGGGTATAAGGAGCCCTGGCAGCACTGTGGT-TAAGTATTCTGGCTGCTAACTGAAAAGTCAGCAGTTTGAACCCTC

CAGCCGCTCTGTCAGATGTGGCAGTCTGCTTCTGTAAAGACTACAGCCTTAAAAACCCCATGGGGCAGTTCTGCTCTGTC

CTGTAGGGTCACTGTGAGTTGGAAGCAACTCGACGGCAATGGGTTGGGGTTTT--TTGTGGGTCTTTGGGAAAGCAGTA-

-------GGCACCAGGAGAAGCT--CGGAGATCATCTCTGTGGTTGGTTCT--TCCATTACTGGGC-------------C

TGGGCACCAGG------------------GAGGGGGCCAAGTGGCTTTCCTTAGGTGCCACCAACCCACTGGTGAT---T

TCTCAC-----AG-GTGGATGAAGCTGTGGCGGTTCTACAGGCTCATCATGCCAAGAAAGAAGC

**IL22**

>Mus_musculus

ACATCGGTGCCATGACTCCTTTCTTCTGGATGTTTGAAGAAAGAGAGAAG------------------------------

--------------------------------------------------------------------------------

--------------------------------------------------------------------------------

--------------------------------------------------------------------------------

--------------------------------------------------------------------------------

--------------------------------------------------------------------------------

--------------------------------------------------------------------------------

--------------------------------------------------------------------------------

--------------------------------------------------------------------------------

--------------------------------------------------------------------------------

-----------------------------------------------------------------------ATGTTCGAG

TTCTATGAGCGGGTGTCTGGGGCCCGGATGCACGCGGCGTA

>Mus_spretus

ACATCGGTGCCATGACTCCTTTCTTCTGGATGTTTGAAGAAAGAGAGAAG------------------------------

--------------------------------------------------------------------------------

--------------------------------------------------------------------------------

--------------------------------------------------------------------------------

--------------------------------------------------------------------------------

--------------------------------------------------------------------------------

--------------------------------------------------------------------------------

--------------------------------------------------------------------------------

--------------------------------------------------------------------------------

--------------------------------------------------------------------------------

-----------------------------------------------------------------------ATGTTCGAG

TTCTATGAGCGGGTGTCTGGGGCCCGGATGCACGCCGCGTA

>Rattus_norvegicus1

ACATTGGTGCCATGACGCCTTTCTTCTGGATGTTTGAAGAAAGGGAGAAG------------------------------

--------------------------------------------------------------------------------

--------------------------------------------------------------------------------

--------------------------------------------------------------------------------

--------------------------------------------------------------------------------

--------------------------------------------------------------------------------

--------------------------------------------------------------------------------

--------------------------------------------------------------------------------

--------------------------------------------------------------------------------

--------------------------------------------------------------------------------

-----------------------------------------------------------------------ATGTTCGAG

TTCTATGAGCGGGTGTCTGGAGCCCGTATGCATGCTGCTTA

>Rattus_norvegicus2

ACATTGGTGCCATGACGCCTTTCTTCTGGATGTTTGAAGAAAGGGAGAAG------------------------------

--------------------------------------------------------------------------------

--------------------------------------------------------------------------------

--------------------------------------------------------------------------------

--------------------------------------------------------------------------------

--------------------------------------------------------------------------------

--------------------------------------------------------------------------------

--------------------------------------------------------------------------------

--------------------------------------------------------------------------------

--------------------------------------------------------------------------------

-----------------------------------------------------------------------ATGTTCGAG

TTCTATGAGCGGGTGTCTGGAGCCCGTATGCATGCTGCTTA

>Cricetulus_griseus

ACATTGGTGCTATGACTCCTTTCTTTTGGATGTTTGAAGAAAGAGAGAAG-GT-----ATGAGAGGGAGGTGTAG--ATA

GGGACAGGGAAGGAAGAATAAGAAGTGGAGA-------------------------------------------------

--------------------------------------------------------------------------------

--------------------------------------------------------------------------------

--------------------------------------------------------------------------------

--------------------------------------------------------------------------------

---CATTTGT---GGGGGGAGGGTT----ATTTTG---------------------------------------------

--------------------------------------------------------------------------------

--------------------------------------------TTGGACT-----------------------------

GTATTTGT-AGGAATCCTGTATCATGAGGCGTTTAGCTAACCACAAGAAGTCAGGACTACGGTTTGAGGAC---------

-----------------TTGGGTTTCCAGGGACTTTGTTTCTAATTCCCAGTGTGTTCTATCT-----AG-ATGTTTGAG

TTCTATGAGCGGGTATCTGGAGCCCGAATGCATGCTGCTTA

>Microtus_ochrogaster

ACATTGGTGCCATGACTCCTTTCTTCTGGATGTTTGAAGAAAGAGAGAAG-GT-----ATAAGAG--AGGTGTGG--ATA

GGAATAGGGAAAGAAGTTTA--------AGAGGGCAGGAAGGAGAAGA--------------------------------

--------------------------------------------------------------------------------

---------------------------------------------------------------TGGAAGGAGGAGA----

--------------------------------------------------------------------------------

-------------------------------------------------------------------------CAGATGA

AAAC---------AGGGGAGAAGCAT---ATTTTG---------------------------------------------

--------------------------------------------------------------------------------

--------------------------------------------TTGGATT-----------------------------

GTATTTGT-AGGA-------------AGTGTTTGGTTAGA--ACAAGAAGTCAG-AGGTAGGGCAGTGGGCTACTGTGTT

GCTGA----------ACTCGGGGGTTGCTGGACTTTGTTTCTAATTCCCAGTGCGTTCTGTCT-----AG-ATGTTTGAG

TTCTATGAGCGGGTGTCTGGAGCCCGAATGCATGCTGCTTA

>Nannospalax_galili

ACATTGGTGCCATGACCCCTTTCTTCTGGATGTTTGAAGAAAGAGAGAAG-GT-----ATAAAAGGGAGGCAAGG--ATA

GGAATAGAGA---AAGTACAGGAAGTAGAGAGGCTATCAATGAGACAGACAGAGAGGAAAGAGAGGAGCTGGGCAATGGT

ACATGCACTGCCTTTAATACCAGTACTCGGGAGGCAGAGGCAGTTAGAGCTCTGTAACATCAGGCCAGCCTGGTTTGTAT

AGCAAGGCCAGCTGGGGCTACAGGGAGACCCTGTGTTAACCCCTCCCCGCCAAATAAAAAGGGAGATAGAAGGAAAACCT

TTTTTTTTTTCGGTCTTTTTGAGACAGGGTCTCCCTGTAGCCCCAGCTGGACTAGAACTCACTATGTAGACCAGGCTGGT

CTCGAACTCACGGAGATCAGCCTACCTCTGCCTCCGGAGTGCTGGGATTAAAGGCATACACCACCATGCCTGGCAAGGGA

AAACATTTAA---GGAGAGAAAGTAT---ATTTTA---------------------------------------------

--------------------------------------------------------------------------------

--------------------------------------------GTGGATT-----------------------------

ATATTCTT-AGGAATTT---------AGGGATTGGGTATATCATAAGAAGTCAGAAAG------------CTACAGTGTT

GTTGG----------ACTTGGTGGCCTA-GGACTTTGTTACTAATTCCCAGTGTGTTCTATCA-----AG-ATGTTTGAG

TTCTATGAACGAGTATCTGGAGCACGAATGCATGCTGCTTA

>Jaculus_jaculus

ACATTGGTGCCATGACCCCTTTCTTTTGGATGTTTGAAGAAAGGGAGAAG-GT-----ATATGAGGGAGGCAAAG--ACA

GGCATAGAGAAGGAAGTACAAGTAGAGTACAGGGCTGGAAAGATGGCTTAGCGG--------------------------

-------------------------------------------------------------------------------T

TAAGGCGCTTGCCTGCAAAGCCTAAGGACTCATGTTCAACTCCAGGTCTCATGTAAACTAGACACACAGAGTGACA----

C-------------------------------------------------------------------------------

------------------------------------------------------------------AGGCATGCAAGGTT

GCACATGTGCACAAGGGGGCACACGT---GTCTGGAGTTGATGGCAGTGGATGAGGCTCTGTGCCCCAATTCTCTCTCTT

GCTCTCT-------------------------------------------------------------------------

--------CACATATCAGAAGTAAAAATTAAAAAAGGCAGTCTGTTGGGTTTGACAAAAAAAAAAAAGAGTATGAAGGAG

ACATTTGT-GTATGTGCTGTATCATGAGGAATTGGTTGAGC-ACAAGAAGGCAG---GTGGGGCTGTGGGTTACTATGAT

-----------------TTAGGGGACCA-GGACGCTGTCACTAATTCTCAGTGTGTTCTGTCC-----AG-ATGTTTGAG

TTCTATGAGCGAGTGTCTGGAGCCCGAATGCATGCTGCTTA

>Castor_canadensis

ACATTGGGGCCATGACCCCCTTCTTCTGGATGTTTGAAGAAAGGGAGAAG-GT-----ATGAGAGGAAGGCAAGG--ATA

AGAATAGGGAAGGAAGTATAGAA-----AGAGACTATGAAGGAGGCAA--------------------------------

--------------------------------------------------------------------------------

-------------------------------------------------------------AACATTAAAAGGAAA----

--------------------------------------------------------------------------------

------------------------------------------------------------------------------GA

GAACATTTA----GGGGAGAAGGTAT---ATTTCT---------------------------------------------

--------------------------------------------------------------------------------

-------------------------------------------CCTGGGTT-----------------------------

AT-------AGGAGCTTTGCATCAGGATGGTTTGCTTGGAT-ACAAGAAGGCAGAAAGTGTGGTAGTGGGCCACC-----

-------------------AGGGGCCCA--GACTTTGTCACTAATTCCCAGTGTGTCCTATCA-----AG-ATGTTTGAG

TTCTACGAGCGAGTATCTGGAGCACGAATGCATGCTGCTTA

>Cavia_porcellus

ACATTGGGGCCATGACCCCTTTCTTCTGGATGTTTGAGGAACGGGAAAAG-GT-----AGGAGAGGGAAGCTTGGGAATT

GGATTAGGGAAGTAAGTACAGGAAATAGGGAAAATATGAAGGCAACAA--------------------------------

--------------------------------------------------------------------------------

---------------------------------------------------------------GATTAAAAGAAGA----

--------------------------------------------------------------------------------

----------------------------------------------------------------------------GGGA

GACCATTTTG---GGGAGCAAGGTA----ATTCAG---------------------------------------------

--------------------------------------------------------------------------------

--------------------------------------------------------------------------------

-------TGAGGGACTC----TTACGAGAGATCTATTGGC--ACAAAAAGGCAAAAGGCAGGGTAGTCGGCCACCGTGTT

ATTGG----------ACTTAAGGGCCCA-GTACTTTGTGACTAATTCCCAGTGTGTCTTATTA-----AG-ATGTTTGAG

TTCTATGAGCGGGTGTCCGGAGCCCGAATGCATGCTGCTTA

>Homo_sapiens

ACCTTGGGGCCATGACCCCTTTCTTCTGGCTGTTTGAAGAAAGGGAGAAG-GT-----AAGAGTGGGAGGAAAGG--ATA

GGAATAGGGAAGGAAGTGCAGGAAGTAGAGAAGGTATAAAGGAGACAG--------------------------------

--------------------------------------------------------------------------------

-------------------------------------------------------GAGATTAAAAGAAGAGAGAGAACAT

--------------------------------------------------------------------------------

----------------------------------------------------------------------------GGGA

GAACATTTAG---AGGGGGAAGGTAT---GTTTAA---------------------------------------------

--------------------------------------------------------------------------------

-------------------------------------------CTTGGGTT-----------------------------

ATATTTGT-AGAAA--CTATATCATGAGGGGTTGGTTGGGC-ACAAGAAGGCAGAAAGTGGGGGAGTAGGCCATCATA--

---GG----------ACCTGGGGGCCTG-GGACTTTGACACTAATTCCCAGCACGTTCTATGA-----AG-ATGTTTGAG

TTCTACGAGCGAGTGTCTGGAGCCCGAATGCATGCTGCTTA

>Bos_taurus

ACATTGGGGCTATGACCCCTTTCTTCTGGATGTTTGAAGAAAGGGAGAAG-GT-----ATGAGGAGGCGGAAAGG--ATG

GGAAAAGGGGAGGAGGTACCTGAGATGGAGCAGGAATGAAGGATGTGA--------------------------------

--------------------------------------------------------------------------------

---------------------------------------------------------------GAATAAAAGGAAC----

--------------------------------------------------------------------------------

------------------------------------------------------------------------------GC

GAACATTTAT---GGGGAGAAGGTGT---ATTTAATCTGGGTTTTATATATATATGTATTTTAAGTTTTTGTTACGTATT

TTTATTTATTTAGCTGCATGGGGTCTTAGTTGTGGCATGGGACTAGTTCCCTGACGAGGAATCGAACCCAGGTCCCCTGC

CTTGGGAGCACAGAATCTTAGCCACTTTTTCACCAGGGAATCCCCTGGGTT-----------------------------

ATATTTTTAAGGAGCTTTGTGTTGTGAAGTGTCGGTTGGGC-CCCAGAAGGCTGGAGGCGGGGGAGTAAACCACCACGGT

GTTGG----------ACTTAGGGACCCA-GGACTTTGTCACTAA--CTCAGTGTGTCCCGTCA-----AG-ATGTTCGAG

TTCTACGAGCGCGTGTCTGGGGCTCGGATGCATGCTGCTTA

>Loxodonta_africana

ACATTGGGGCCATGACTCCTTTCTTCTGGATGTTTGAAGAAAGGGAGAAG-GT-----ACGAGAGAGAGGAACTG--ATA

GGAATGGGGAAGGAAGTACAGGAGGTAGAGAAGGTATGAAGGAGACAA--------------------------------

--------------------------------------------------------------------------------

--------------------------------------------------CAGATTAAAAGAGAGGAAGAGAGAGAACAC

--------------------------------------------------------------------------------

---------------------------------------------------------------------------AGGGA

GGACATTTGT---GGGGAGAAGGTGTAGAATATAA---------------------------------------------

--------------------------------------------------------------------------------

-------------------------------------------CCCGGGTC-----------------------------

ATATTCTT-CGGAACTCTGTGTCAGGAGGGGTTGGTCGGAC-ACAGGAAAGTAGGGGGTGGGAGAGTGGACTACCGTGTT

GTTGAAATACTGTATAATTAGGGGCCTA-GGACTTTGTCACTAATTCCCAGTGTGTCCTATCA-----AG-ATGTTTGAG

TTCTACGAGCGAGTGTCTGGAGCTCGAATGCATGCTGCTTA

**IL23**

>Mus_musculus

AGAAGAAACTGAAGGAGCTGAAGGCTGGGGGCAAGTCCACCAAGCAAGCG------------------------------

--------------------------------------------------------------------------------

-----------------------------------------------------GAAAAGCAAACAAAGGAAGTCCTGACT

CGAAAACAGCAGAAGTGCCGACG

>Mus_spretus

AGAAGAAACTGAAGGAGCTGAAGGCTGGGGGCAAGTCCACCAAGCAAGCG------------------------------

--------------------------------------------------------------------------------

-----------------------------------------------------GAAAAGCAAACAAAGGAAGTCCTGACT

CGAAAACAGCAGAAGTGCCGACG

>Rattus_norvegicus

AGAAGAAGCTGAAGGAGCTGAAGGCTGGGGGCAAGTCCACCAAGCAAGCG------------------------------

--------------------------------------------------------------------------------

-----------------------------------------------------GAAAAGCAAACAAAGGAAGTCCTGACT

CGAAAACAGCAGAAATGCCGAAG

>Cricetulus_griseus

AGAAGAAGCTGAAGGAGCTGAAAGCTGGGGGCAAGTCCACCAAGCAGGCC-GT-----GCG---------TGCCCA----

------------------------CGCTCGCAGAGGAGGGCAGGAGGGCAGGATGGGAG-AGCCCAT---------GGGA

----CTGGGCGGCGTCTGGAGCGCTTCCTTCCTCCCTCAT---CC-----AG-GAGAAGCAAACCAAGGAAGTCCTGACT

CGAAAACAGCAGAAGTGCCGACG

>Microtus_ochrogaster

AGAAGAAGCTGAAGGAGCTGAAGGCTGGGGGCAAGTCTACCAAGCAGGCA-GT-----GCG---------TGTCTA----

------------------------AACTTGTGGGGAGCAGGGTGGG--------------AGCCTGT---------GGGA

----CTGAGCC-CGCATGGATTGCTGCCTTCTTCCCTCGT---CC-----AG-GAAAAGCAAACAAAGGAAGTCCTGACT

CGAAAACAGCAGAAATGCCGTCG

>Nannospalax_galili

AGAAGAGGCTGAAGGGGCTGAAGGCTGGGGGCAAGTCCACCAAGCAGGCG-GT-----GAG----------GCCAGGGGC

ACCAAGGG----------------CATCTCCCAAGGAGGGGCTGAG--------------CGCCTGTCCATCTCCAAGGG

CTTTCCCAGCAGCGTGCAGATTGTGCCCGTCTTCGTTT-----CC-----AG-GAAAAGCAAACGAAGGAAGCCCTGACT

CGAAAGCAGCAGAAATGCCGGCG

>Jaculus_jaculus

AGAAGAAGCTGAAGGAGCTGAAGGCTGGGGGCAAGTCCACCAAGCAGGCT-GT-----GAG---------CACCTG----

------------------------CTTTTCTGTCAGCTGGAATGGGCGC-----------AGACTGTGCA----------

----CTGGTCAGCCTGTGGATCACTGTCTTCTTCTTCCT----CC-----AG-GAAAAGCAAACAAAGGAAGCTCTGACT

CGAAAGCAGCAAAAATGCCGCCG

>Dipodomys_ordii

AGAAAAAGCTGAAGGAGCTGAAGGCTGGTGGCAAGTCCACCAAGCAGGCG-GT-----AAG----------CCCTG----

------------------------CTTTTTTAACAGTGGGAAACGA----------------------CACACTGCAGCG

ACTACTGGGCAGTCTTCAGATTCCTCCCTTTTTTCTCTC----CC-----AG-GAAAAGCAAACAAAGGAAGCCTTGACT

CGAAAGCAGCAGAAATGCCGGCG

>Cavia_porcellus

AGAAGAAGCTGAAGGAGCTGAA-GCCGGCGGCAAGTCCACCAAGCAGGCG-GT-----GAG---------TGCC------

------------------------ATGTCCCCGGCCTGGGGAGGGGCGCG----------CAGCTGACT-----------

----CAGGGCTACGACTGGG------------------------------------------------------------

----------------GCAGGCG

>Homo_sapiens

AGAAAAAGCTGAAGGAGCTGAAGGCAGGCGGGAAGTCCACCAAGCAGGCG-GT-----GAG---------CACCTGAGGG

ACTTCTGGGCTGGGGGCCACTGTTCTCTCCTGGCAGTGGAGGAAGAAGGAGACTCTGGAACGCTGGCCTACATTTCAAGG

ACTGCCGCGCAGGGCTCAGGTTTCTCTTTTTTCCTCTTCCTCTCC-----AG-GAAAAACAAACGAAGGAAGCCCTGACT

CGGAAGCAGCAGAAATGCCGACG

>Bos_taurus

AGAAAAAGCTGAAGGAGCTAAAGGCGGGTGGCAAGTCCACTAAGCAGGCG-GT-----GAGCGCTGGCTCTTCCTGGGCA

GGGAT-------------------CTTCTCAGGAAAAGGAGGGGGGCTCGG---------ACCCTGCCTGCCATTCAAGG

CCTCCCGTCCAAGGCTTGGATGTCTCCCTTTTCCCGTCCTGC-TC-----AG-GAGAAGCAAACCAAGGAAGCCTTGACT

CGAAAGCAGCAGAAGTGCCGGCG

>Loxodonta_africana

AGAAAAAGCTGAAAGAGCTGAAGGCGGGTGGCAAGTCCACCAAGCAGGCA-GT-----GAG---------CACCTGAGGC

TGGATCGCCTCCC-----------TTCTCATGAGAATGGAGACAGGGTAACTCTGGG---TCACAGTCTACATTTCAAGG

ACTGCTATGCAGCATGTGGTTTTCTTCTTCCTCTTCCTCC---CC-----AG-GAGAAACAAACAAAGGAAGCCCTGACC

CGAAAGCAGCAGAAATGTCGACG

**IL24**

>Mus_musculus

AGCACCTGCGGGTCATTGGGGCGGTGGGCATTGGCATCGCCTGTGTGCAG------------------------------

--------------------------------------------------------------------------------

--------------------------------------------------------------------------------

--------------------------------------------------------------------------------

--------------------------------------------------------------------------------

--------------------------------------------------------------------------------

--------------------------------------------------------------------------------

--------------------------------------------------------------------------------

--------------------------------------------------------------------------------

--------------------------GTCTTCGGCATGATCTTCACCTGCTGCTTGTACCGAAGCCTCAAGCTGGA

>Mus_spretus

AGCACCTGCGGGTCATTGGGGCGGTGGGCATTGGCATCGCCTGTGTGCAG------------------------------

--------------------------------------------------------------------------------

--------------------------------------------------------------------------------

--------------------------------------------------------------------------------

--------------------------------------------------------------------------------

--------------------------------------------------------------------------------

--------------------------------------------------------------------------------

--------------------------------------------------------------------------------

--------------------------------------------------------------------------------

--------------------------GTCTTCGGCATGATCTTCACCTGCTGCTTGTACCGAAGCCTCAAGCTGGA

>Rattus_norvegicus1

AGCACCTGCGGGTCATCGGGGCCGTGGGCATTGGCATCGCCTGTGTGCAG------------------------------

--------------------------------------------------------------------------------

--------------------------------------------------------------------------------

--------------------------------------------------------------------------------

--------------------------------------------------------------------------------

--------------------------------------------------------------------------------

--------------------------------------------------------------------------------

--------------------------------------------------------------------------------

--------------------------------------------------------------------------------

--------------------------GTCTTCGGCATGATCTTCACCTGCTGCTTGTACAGAAGCCTCAAGCTGGA

>Rattus_norvegicus2

AGCACCTGCGGGTCATCGGGGCCGTGGGCATTGGCATCGCCTGTGTGCAG------------------------------

--------------------------------------------------------------------------------

--------------------------------------------------------------------------------

--------------------------------------------------------------------------------

--------------------------------------------------------------------------------

--------------------------------------------------------------------------------

--------------------------------------------------------------------------------

--------------------------------------------------------------------------------

--------------------------------------------------------------------------------

--------------------------GTCTTCGGCATGATCTTCACCTGCTGCTTGTACAGAAGCCTCAAGCTGGA

>Cricetulus_griseus

AGCACCTGCGGGTCATTGGGGCTGTGGGCATCGGCATCGCCTGTGTACAG-GT-----ATGGAAACAGAG----------

--------------------------------------------------------------------------------

--------------------------------------------------------------------------------

-------GTGACTA-------G----------------------------------------------GTGGGAACACTG

G-------GGTG--------------------------------------------------------------------

--------------------------------------------------------------------------------

--------------------------------------------------------------------------------

--------------------------------------------------------------------------------

-----------------------------------------GCTGGTGGCCC-ACAGC--CTTTTTACACCAGC------

----CTGGTCCCAT--GC-----AG-GTCTTCGGCATGATCTTCACCTGCTGCTTATACAGAAGCCTCAAGTTGGA

>Microtus_ochrogaster

AGCACCTGCGTGTCATCGGGGCTGTGGGCATCGGCATTGCCTGTGTGCAG-GT-----GAGGAAACACAG----------

--------------------------------------------------------------------------------

--------------------------------------------------------------------------------

-----GGGTGAAGA-------G----------------------------------------------GTGGGAACGCTG

G-------GGTG--------------------------------------------------------------------

--------------------------------------------------------------------------------

--------------------------------------------------------------------------------

--------------------------------------------------------------------------------

-----------------------------------------GCTGGTGGTCC-GCAGC-TCTGTTCACACCAGC------

----CTGGCCCTCT--GC-----AG-GTCTTCGGCATGCTCTTCACCTGCTGCTTGTACAGAAGCCTCAAGCTGGA

>Nannospalax_galili

AGCATTTGCGGGTCATTGGGGCCGTGGGCATCGGCATTGCGTGCGTGCAG-GT-----ACAGGCACACGG----------

--------------------------------------------------------------------------------

--------------------------------------------------------------------------------

-----GGATGACTC-------A----------------------------------------------GTGGGATCACTG

G-------GATG--------------------------------------------------------------------

--------------------------------------------------------------------------------

--------------------------------------------------------------------------------

--------------------------------------------------------------------------------

-----------------------------------------GCTGGTGGCTC-ACAGC-CCTGCTCATGGCCAC------

----TTGACCCCAC--AC-----AG-GTCTTTGGCATGATCTTCACCTGCTGCTTATACAGAAGCCTCAAACTGGA

>Jaculus_jaculus

AGCACCTGCGGGTCATTGGAGCCGTGGGCATTGGTATCGCCTGTGTGCAG-GT-----ATGAGCACATGG----------

--------------------------------------------------------------------------------

--------------------------------------------------------------------------------

------GGTGACTT-------G----------------------------------------------GCAGGGACTGTG

G---------TG--------------------------------------------------------------------

--------------------------------------------------------------------------------

--------------------------------------------------------------------------------

--------------------------------------------------------------------------------

-----------------------------------------GTTGGTGGTTC-ATGTCTCTTGCTCATGCATAC------

----CTGGTCCTTT--GC-----AG-GTCTTTGGCATGATCTTCACCTGCTGCTTGTATAGGAGCCTCAAGTTGGA

>Castor_canadensis

AGCACCTGAGGGTCATCGGGGCCGTGGGCATCGGCATCGCCTGTGTGCAG-GT-----GCGGGTACACAG----------

--------------------------------------------------------------------------------

--------------------------------------------------------------------------------

------GGTTGCTT-------G----------------------------------------------GTGGGGATATTG

G-------GATG--------------------------------------------------------------------

--------------------------------------------------------------------------------

--------------------------------------------------------------------------------

--------------------------------------------------------------------------------

-----------------------------------------GCAGATGGGCCCCTGGC-ACCACTCATGCCTGC------

----TTGGCTCTGC--AT-----AG-GTCTTCGGCATGATCTTCACATGCTGCTTGTACAGGAGCCTCAAGCTGGA

>Cavia_porcellus

ACCACCTGAGGGTCATTGGGGCTGTGGGCATCGGCATTGCCTGCGTGCAG-GT-----ATGGGC---CAG----------

--------------------------------------------------------------------------------

--------------------------------------------------------------------------------

-----GGGCGG----------G----------------------------------------------GCTGGGGCTGGG

A----GTAGGTG--------------------------------------------------------------------

--------------------------------------------------------------------------------

--------------------------------------------------------------------------------

--------------------------------------------------------------------------------

-----------------------------------------GCTGGCAGCCCTGAGGC--CCACTCAGAGCCAC------

----ATTACTGTGC--AT-----AG-GTCTTCGGCATGATCTTCACTTGCTGCTTGTACCGGAGCCTCAAGTTGGA

>Homo_sapiens

AGCACCTGAGGGTCATTGGGGCTGTGGGGATCGGCATTGCCTGTGTGCAG-GT-----GAGGGCACATGG----------

--------------------------------------------------------------------------------

--------------------------------------------------------------------------------

-----GGGTGGCGGTCATCTTG----------------------------------------------TTGGGGACACGG

GGCAGGGCGGTG--------------------------------------------------------------------

--------------------------------------------------------------------------------

--------------------------------------------------------------------------------

--------------------------------------------------------------------------------

-----------------------------------------GCTGGTGGCCCCATGACGTCTGCTTACGCCCAC------

----CCGGCTCTGCACAC-----AG-GTCTTTGGCATGATCTTCACGTGCTGCCTGTACAGGAGTCTCAAGCTGGA

>Bos_taurus

AGCACCTGAGGATCATCGGGGCCGTGGGCCTGGGCATTGCCTGTGTACAG-GT-----GTGTGTGTGTGG----------

----------------------GGGGGTGC--------------------TGGGCATGGCCCGTGTG-------CAGGTG

T---GTGTGGG---CTGGGCATCGCCTGTGTG-------CAGGTGT---GTGTGGGGGGCTGGGCATCGCCCGTGTGCAG

GTGT--GGTGTCGG-------G---GGGGC--TGGGTATCACTCGTGTGCAGG----------TGTGTGTGGGGGGCTGG

GCATCGCCCGTGTGCAG-----GTGTGGTGTGCATGGGGGGCTGGGCATCACCCGTGTAC--------------------

---GGTGT---GTGTGGGGGGCTGGGCATCGCCCATGTGCAGGTGTGTGGTG--------GGGGCTGT--ACCTCGCCCG

TGTGCG------GTGTGTTGCG---GGGGCTGT--GCATCACCCGTGTGCAGG----------TGTGTGGGAGGAGCTGG

GTATCGCCAGTGTACAGA----TGTGGTGTGCATGGGGGGCTGGGCATCACCCGTGTGCAGGTTTGTGGGGGGCTGGGCC

TCGCCCGTGTGC--CATGTGT--------------------GTTGCGGGC---------------CGGGGCTGACGTGCT

CTTGCTGGCCCTGTGCTC-----AG-GTGTTCGGGATGCTCTTCACCTGCTGCCTGTACAAGAGCCTGAAGCTGGA

>Trichechus_manatus

AGCACCTGCAGATCATCGGGGCCGTGGGCATCGGTATCGCCTGCGTGCAG-GT-----GCGAGGGCAGGGTGTTGGGCAC

GGGACATGGGCATCGCCTGTGTGAGGGTCCAGGCGTCGGGCGTGGGGCCGTGGGCATGGTCTGTGTGCGAGGACCGGGTG

TCGGGCGTGGGGCCGTGGGCATTGCCTGCGTTCCGGGGCCGGGTGTCTGGCGTGGGGCCGTGGGCATTGCCTGTGTTCCG

GGGCCGGGTGTCGG-------GCGTGGGGCCATGGGCATTTTCTGTGTGCGGGGGCCGGGTGTTGGGCGTGGGGCCGTGG

GCATTGCCGGTGTGCGGGGGCCGGGTGTTGGGTGTGGGGCCATTGGCATTGCCTGTGTGCNNNNNNNCGGTGTGCGGGGG

CCGGGTGTTGGGTGTGGGGCCATTGGCATTGCCTGTGTGCAGGGGCCGGGTGTTGGGCGTGGGGCCGTGGGCATTGTCTG

TATGTGGGGGCCGGGTGTTGGGCGTGGGGCCGTGGGCATTGCCTGTGTGCGGGGGCCGGGTGTTGGGCGTGGGGCCATTG

GCATTGCCTGTGTGCGGGGGCCGGTGTTGGGCGTGGGGCCGTGGGCATTGCCTGTGTGTGGG--GGCTGGGTGTTGGGTA

TGGGCCGTGAGCATCACCTGTGGACAGGTAGGACATGGCTGGTGGCGGGCCCTGTGGCCCCTGCTCATGTCTGG----CC

TGTCCTTGC--TGCC-CC-----AG-GTGTTTGGCATGATCTTCACCTGCTCTCTGTACAAGAGCCTGAAGCTGGA

**IL25**

>Mus_musculus

CTATGTTGCCCACAACTTCAACAAGCTCTTCAGCATGGAGAACTGGGGAG------------------------------

--------------------------------------------------------------------------------

--------------------------------------------------------------------------------

--------------------------------------------------------------------------------

--------------------------------------------------------------------------------

--------------------------------------------------------------------------------

--------------------------------------------------------------------------------

--------------------------------------------------------------------------------

--------------------------------------------------------------------------------

----------------------------------------------------------------GCGCCACGTTCGACGT

TGCCATGCGCTTCCTGTACGAGTGCCCCTGGCGG

>Mus_spretus

CTATGTTGCCCACAACTTCAACAAGCTCTTCAGCATGGAGAACTGGGGAG------------------------------

--------------------------------------------------------------------------------

--------------------------------------------------------------------------------

--------------------------------------------------------------------------------

--------------------------------------------------------------------------------

--------------------------------------------------------------------------------

--------------------------------------------------------------------------------

--------------------------------------------------------------------------------

--------------------------------------------------------------------------------

----------------------------------------------------------------GCGCCACGTTCGACGT

TGCCATGCGCTTCCTGTATGAGTGCCCCTGGCGG

>Rattus_norvegicus

CTACGTTGCCCACAACTTCAACAACCTCTTCAGCATAGAGAACTGGGGAG------------------------------

--------------------------------------------------------------------------------

--------------------------------------------------------------------------------

--------------------------------------------------------------------------------

--------------------------------------------------------------------------------

--------------------------------------------------------------------------------

--------------------------------------------------------------------------------

--------------------------------------------------------------------------------

--------------------------------------------------------------------------------

----------------------------------------------------------------GAGCCACATTTGACGT

GGCCATGCGCTTCTTGTATGAGTGCCCCTGGCGG

>Cricetulus_griseus

CTATGTTGCCCACAACTTCAACAAGCTCTTCAGCATGGAGAACTGGGGAG-GT-----AG-CTAGAGGAGGGCTGGGGTG

TTAG----ACAGTG-CTAGCAGGGAT------------------TGAGTGC-----------CCAACCCAGAAGGCCCAG

---------GACACTAGGGA-CAG--AGAGATGCTGACAG-------------------TGGGACAGTGAGGGCAAGGG-

--------------------TGTTTGTTCCACAAAAACCAACTACAGCCAGCTTCTGTTGGAACA------------GAG

GCTGCATGGCTGGGATGTAGGCCCTGTCCTGAGTAGCTTGAGGGCAGGGAGG----------------------------

--------------------------------------------------------------------------------

-------------------------AG---------GTACAGAG------------------------------------

---------------AAGACCCTGAGTTTCC----TGAGCATCAGT-GGAGGGAGAGGCTGGTGGGGGCTCA-------A

CATGAGGAACCCTGGAAGTCAG---------------------CAGGCCATG----------------TAGAGCATTGTA

GGGTCCTTGTGACATGGGG---TGACCAGC--------CCCTCTCTTCCTGTGC-------AG-GGGCCACATTTGATGT

TGCCATGCGCTTCTTATATGAGTGTCCCTGGAGG

>Microtus_ochrogaster

CTATGTTGCCCACAGCTTCAACAGGCTCTTCAGCATGGAGAACTGGGGAG-GT-----AG-CTGGAGGAGGGCTGGGATG

TTGG----ACAGTG-CTAGCAGGAAT------------------GGAGTGC-----------CCAACGCAGAAGGC-CAG

---------GACACTAGGGA-CAG--AGAGATGCTGACAG-------------------AGAGACA--------------

-------------------------------------------GCAGCCGGCTCCTGCTGGAAAAAGCCTAGTGCTTGAG

GCTGCAGGACTGGGGTGTAGGCCCTGTCCTGGGTAGTTTGAGGGCAGCGGGG----------------------------

--------------------------------------------------------------------------------

-------------------------AGCTCATCAATGCTTGCAG------------------------------------

-------GATCTCAGATGAGCCTGAGTATCCC---AGAGCATCCGT-GGAGGGAGAGGCGGGGGG---------------

-----------CTGGGAGTGAG-----------------------------------------------GGAGCCATGGA

GGGTCCTTGTGACATGTGGAG-TGACCAGT----------CTCTGTTCTTGCCC-------AG-GAGCCACATTCGATGT

TGCCATGCGCTTCTTATATGAGTGCCCCTGGAGG

>Nannospalax_galili

CTATGTTGCCCACAGCTTCAACAAGCTCTTCAGCATGGAGAACTGGGGAG-GT-----AGGCTAGAAGCAGGCTGGGATG

TTGG----ACAGCA-CTGGCAAGAAT------------------TGGTTTT-----------CCAACTCAGAAGAAGCTA

---------GAAA---GGAG-AAGCTAGAGGTGTTTACAG-------------------TGAGGCAACCAAAGCAGGAGA

CCTG-----------------GTTTGTTCCATAAATGCCAGCTGCAGCCAGCTCCTGCTGGCCT--------GGCCCGAG

TCTGCGGGGCTGGAACACAGGCATGGTCCCGAGCAGCTTGGAGGCAGGGAGG----------------------------

--------------------------------------------------------------------------------

-------------------------AGCTAGTCACAGTGTGCAGTTCCAGGGGAGGACATGGGTATG-------------

--AAAGTGGGTACAAGTGAGCCCTAGCTACCC---TGAGCATAAAT-GGAGGGAGAGGCGGTAGGGCCAGCA-CTGGGGA

CAAGAGGAACCCTGGAGGTGAG---------------------CAGGCT--------AGAGCTG----CAGGGCA-CATG

GGGCCATCACAACATGTGGTG-TAACCAGC--------CTGTCTGTCCCTGTCC-------AG-GAGCCACATTTGATGT

TGCCATGCGCTTCCTGTATGAGTGCCCCTGGCGG

>Jaculus_jaculus

CTATGTCGCCCACAGCTTCAACAAGCTCTTCAGCATAGAGAACTGGGGAG-GT-----AGGCTAGAGGAGGGCTGGGATG

TTGC----AAAGAA-TTGGTAGGAAT------------------TGAGTGT-----------TCAGCCACAAAGGCCCA-

---------GGCACTGAGAG-AAGCTAGAGATGTTGACAA-------------------TGAGACAACCAAAAAGTGACA

GTTGAAGAGGTCACTGTGTTTACTTGCTCCACAAA---CAACTGCAGCCAGCTCCTGCTGGCCTTGA----GTGCTTGAG

GTTGCAGAGCTGGGGCACAGGCACCATTCTGAGCACTTTGGGAGCAGGGAGG----------------------------

--------------------------------------------------------------------------------

-------------------------AACTAAACCCCGCATGGAG---GAGGGGAGGTTGTGAGGGCG----------GGT

GCAGAGCGAGCACAAGTGAGCCTGAGCGGCCC---AGAGCATCAAC--AAGAGAGAGGCTGGTGGGTCAGCA-CTGGGAA

CACAAGGAACCCTGGAGGTGAGGA------------GAGGCCAGAGGCTTGT--CACAGAGCTG----CAGGGTGTCATG

GGGTCGTCATAACATGCAGAG-TGACCAGC--------CTGTCCGTCCCCGCGC-------AG-GAGCCACATTTGACGT

TGCCATGCGCTTCTTGTACGAGTGCCCCTGGCGG

>Castor_canadensis

CTATGTTGCTCACAGCTTCAACAATCTCTTCAGCATAGAGAACTGGGGAG-GT-----AGGCTAGA-GAAGGTTGGGGTG

CAGG----GCAACA-CT-GCAGGAGT------------------TGGGTACCCACTGTGTGGCCAGCCCTAAAGGCGTAG

GCTACTGAAGACACTGGGAG-AAGCTAGAGATGTTGACGT-------------------TGAGAAAACCAGAG--TGAGA

ACTGAAGAAGGCA--GTGCTGACTTGTTCCACAAACACCAGCTGGAAGTAGCTCTGGCCAGACCTGCTGCTGGGCCTGAG

GCTGCAGAGTTGACTCA---GCACTGTCCTGAGCAGGTTGGGGTCCGGGAGGAAACACATTTTGGGTTTTGTTTTCTTTT

TGGGGGGGGGTAGTACTGGGGCTTGAACTCAGGGACTTGCGCTCACTAGGCAGGTGCTCTACCACTTGAGCCACATTCCC

AGCCCAGGGAGGAAACATAGGCTGTAGTTAATCACAGCACAGAGAACTAGGGCAGGAGGGCAGGAGGGCCATAAAGGCAT

GCACAGAGGGCACA-GTGAGCCTGAGCTGCCC---TGAGGATCAACAAGGGAGAAAGTTGGTGGGGTTGGCA-CTGGGAA

CATGAGGAACCCTAAAGGAGAGGA------------GGGGCA-GAGGCC-------CAGAGCTG----ACGGGCATGGCA

GGGTCACTGTGACATGCAGAG-TGACCCAG--------CGCTCTGTCCCTGTGC-------AG-GAGCCACATTTGATGT

TGCAATGCGCTTCCTGTATGAGTGCCCCTGGCGG

>Cavia_porcellus

CTATGTCGCCCATAGCTTCCACAAGCTCTTCAGCATGGAGAACTGGGGAG-GT-----AGGCTAGAGAAGGGCGGGGATG

TTGA----TCAACA-TTGGTGGGAAT------------------TGGGTGT---------------CCCCAAAGGCCCAG

---------GACACTAAGAG-AAGCTGGAGCTATTGACAGGTCTCTCTCAGATCACTCTGGACACAAAACTAGAGTGAGA

ACTG-AGAAAGCAGGGTGCTCATTTGTTCCACAAA------CTGGAACCAACTCCAGCCAGACGTGGTGCTGGGTTTGAG

GCTGCAAAGCTGAGACCCAGGCACTGTCCTGAGCAGCTCAGCAGGAGGGGACCTAGCCTGGT------------------

--------------------------------------------------------------------------------

-------------------------AGCTAATCACAGCATGGAAAACTGAAGGAGGATGTGCAGGTG-ATAAAGACAGAT

GTGCAGAGAGTCCA-GCGAGCCTCAGCAACC----AGAGCATCAACAAAGGGGAGTGTTGGGGATGTCTGGAGCTGAGAA

TACAAGGAACCCTAAACGTGAGCA------------GGGGCCCACAGCCCAGGCTGCAAAGTTG----CAGGCCCCTGCA

GGATTGCAGTGACTGCCAGAGCTGACCTGCGCTGCACTTCTTCTCCACCTGCTCCT-----AG-GAGCCACATTTGATGT

TGCAATGCGCTTCTTGTATGAGTGTCCCTGGCGG

>Homo_sapiens

CTATGTTGCCCACAACTTCAGCAAGCTCTTCAGCATGGAGAACTGGGGAG-GT-----AGGCTGGC-----------ATG

CTGC----GCAGCGCCTGGTAGGAAT-------------------GGGCGCCCGCTCTGTGGCCAGTCCCACAGGCTTAG

---------GCCACTGGGGACAAGCTAGAGACGCTGACAC-------------------GAAGAACACCAAAGAGGAAGG

ACCGAAGAAGGCACAGC-----------------------------GCCCTCTCCGGCCAGGCCTGGTGCCG-GCACGAG

GTTGCAGAGCTGAGAC-CAGGTGC-ATCCTGGGAGGTCCAGGGTCAGGAGGAGACACCTGCC------------------

--------------------------------------------------------------------------------

-------------------------TGTTAATTATAGCACAGAGAGGTAGAGGAGAAGATGGGATTA---TAAAGGGGGC

ATAGAAGGGACACAAATGAGCCTGGTCTCCCCCTTAGAG-ATCAGACAAGGGAAAAATCTGTGGGGGTTGGAGCAGGGAA

CAC-AGGTATGGCGAAGATGAGCAGGACCTGGTATTGGGGCCAGAGGCTTGTGCTGCAGAGCTAGCTCCAAGGCCTGGTG

GAGTTCCCCAGGCATGCAGAGCTGATCTGGGC------CTCTCGGTTCCTGTGC-------AG-GAGCCACGTTTGACGT

CGCCATGCGCTTCCTGTATGAGTGCCCCTGGCGG

>Bos_taurus

CTATGTTGCCCACAGCTTCAACAAACTCTTCAGCATAGAGAACTGGGGAG-GT-----AGGCTGGAAGAGGG-AGGGGTG

TGGGCCCCACAGTG-CAGGCGGG---------------------------------------TCA---------------

---------CTCTCTGGGAC-AAGCTGGAGGTGGGAACCC-------------------TGGGGGAATC----CGTGGGA

ACTGAACAAGGCAAGGCGTTCGCGGGTTTAGCAAATGGTGACCCGTGTCC-CTTCTCCCGGACCTGGTGCCGGACCTGAG

GTCGCAGAGCTGAAAC------------CCTGGCAGCTCAGGGTGAGAGAGGAGATGCCAGCCTGTT-------------

--------------------------------------------------------------------------------

-------------------------GGCGCGCTGTGGCACAGAGAAGGGGGGTAAGGGCTGTGAGGG---------GGGC

GCAGAGAGGACACT-GTGAGCCCAAGTGGTCCC--AAGGGGCCAGC--AAAGGAAAGTCTGCAGGGGTCAGGGCCAGG-A

TGTGAGGACCCTGATGGGCAGGGCGCTGTTAAGACCGGAGTCGCAGGCCG------------------CGGGGCATGGCG

GGGCCCCCGGGACGCGAAGGGCTGACCTGGGC------CTCTTGGTCTCGGTGC-------AG-GAGCCACCTTTGACGT

CGCCATGCGCTTCCTGTACGAGTGCCCCTGGCGA

>Loxodonta_africana

CTATGCCGCCCACAACTTCAGCAGCCTCTTCAGCATGGAGAACTGGGGAG-GT-----GAGCTGG---------------

--------ACAGCGCCTGGCGAGAATTTCTGCATGGTGCGTCCCTGGGTCCCCACCGTGCGGCCAGCGCTGCAGGCCTGG

---------GCTGCTGAGA--CATCCGGGGA----------------------------GGAAACGCTGGGGACATGAGC

CTTGGGGTG------------------------------------AGGCAGTGTCCGCT---------------------

----CAGTGCTCACTCGTGGTGCCTGCCCTGAGC------GAGACGGTGAGCAGCCATTGGCCTTCG-------------

--------------------------------------------------------------------------------

-------------------------TGTTAATCACAGCACAG----CTTGGGGCCTGTGTGAGG-------------GGC

GCAGGGAGATCACAGGCAGGCC-------------AGAG-ATTGGA-GGAGCAGAAGCCTGCAGGGGTGGGA---GGGAG

CCTGGGGGAGCCTGAGGAGCAGG---------------------------------------------CCGGG---TGTT

GGGCTC----------------TGACCTGGGCTCTGGTCCCTC------------------AG-GAGCCACGTTCGACGT

CGCCATGCGCTTCCTGTATGAGTGCCCCTGGCGG

**IL26**

>Mus_musculus

TGTTCCTGTTCAGCCCGAGCAGCTTGCAAGTGCTGGATTCTATTACGTGG------------------------------

--------------------------------------------------------------------------------

--------------------------------------------------------------------------------

--------------------------------------------------------------------------------

--------------------------------------------------------------------------------

--------------------------------------------------------------------------------

-----------------------------------------------------ATCGCAATGATGATGTCAAGTGCTTTT

GTTGTGATGGTGGCTTGAGATGT

>Mus_spretus

TGTTCCTGTTCAGCCCGAGCAGCTTGCAAGTGCTGGATTCTATTACGTGG------------------------------

--------------------------------------------------------------------------------

--------------------------------------------------------------------------------

--------------------------------------------------------------------------------

--------------------------------------------------------------------------------

--------------------------------------------------------------------------------

-----------------------------------------------------ATCGCAATGATGATGTCAAGTGCTTTT

GTTGTGATGGTGGCTTGAGATGT

>Rattus_norvegicus

TGTTCTTGTTCAGCCTGAGCAGCTTGCAAGTGCTGGATTTTATTATGTGG------------------------------

--------------------------------------------------------------------------------

--------------------------------------------------------------------------------

--------------------------------------------------------------------------------

--------------------------------------------------------------------------------

--------------------------------------------------------------------------------

-----------------------------------------------------ATCACAATGATGATGTCAAATGCTTTT

GTTGTGATGGTGGCTTGAGATGT

>Cricetulus_griseus

TGTTCCTGTTCAGCCTGAGCAGCTTGCAAGTGCTGGATTTTACTATGTGG-GT-----AAGATGTTAACAG---------

--------------------------------------------------------------------------------

--------------------------------------------------------------------------------

--------------------------------------------------------------------------------

--------------------------------------------------------------------------------

----------------------AGACTAGAACTTTC-----------TCTTTTTTGTTTAT---------GGGAATATAC

ATG-AGTCAGTTTCTCATCTTCTTTT------------CTTGTTT-----AG-ATCGCAATGATGATGTCAAATGCTTTT

GTTGTGATGGTGGCTTGAGGTGT

>Microtus_ochrogaster

TGTTCCTGTCCAGCCCGAGCAGCTGGCAAGCGCTGGATTCTACTACGTGG-GT-----AAGATGTTAGTGG---------

--------------------------------------------------------------------------------

--------------------------------------------------------------------------------

--------------------------------------------------------------------------------

--------------------------------------------------------------------------------

---------------------AGAACTAGAGTTTTA------------TTAGCTTGTTTAT---------GGGAATACAC

ATG-AGTCAGTTTCTGGCCTTTTTT-------------CTTGTTT-----AG-ATCGCAATGATGATGTCAAATGCTTTT

GTTGTGATGGTGGCTTGAGGTGC

>Nannospalax_galili

TGTTCCAGTTCACCCCGAGCAGCTTGCAAGTGCTGGTTTTTATTACGTGG-GT-----AAGAAGTTAACAA---------

--------------------------------------------------------------------------------

--------------------------------------------------------------------------------

--------------------------------------------------------------------------------

--------------------------------------------------------------------------------

---------------------ATAATTACA----TTACT------AGCTTGTTTTATGTAT---------TAGACCATGT

GGGTAGCCAATTTATGGTCTTTTTTTTTTTTCTTTTCCCTTTTTT-----AG-ATCGCAACGATGATGTCAAATGTTTTT

GTTGTGATGGTGGCTTGAGGTGC

>Jaculus_jaculus1

TGTTCCAGTTCAGCCTGAGCAGCTAGCAAGTGCTGGTTTTTATTATGTGG-GT-----AAGAATCTAATAGCTACATAGT

TTAGTTTTTTTTTTTTTTTTCTTCTTCGAGGTAGGGTTTCACTCTGGCTCAGGCTGACCTGGAATTCACTATGTACTCTC

AGGGTGGCCTCGAAGTCATGGCGATCCTCCTACCTCTGCCTCCAGAGTGCTGGGATTTAAAGGCGTGTGCCACCACACCC

AGCAAGTTTAGTTTTTAATTATGTGTGTATGTGTGCCCATGTGCACGTGGGCATGTGTGCCCTACCCCCAACACATTCAC

ACCATAGGTTAGCTTTATGTGGGTGGATGGGGAGTGAACTGTGGCTGGCAGGCTTTGCAAGCCAGCACCTGTAACCACTG

ACCTATATCCCCAGTCCCATAATAGCTATATGTTTTATC-----CAGTTGGTTTTATGTAT---------CAGAACAAAC

ACATAGTGAGGTTTTGGTTTGTTTT-------------CTTGTTT-----AG-ATCGCAATGATGATGTCAAATGCTTTT

GTTGTGATGGTGGCTTGAGGTGT

>Jaculus_jaculus2

CTTTCTTGTCCATCCTCAGCAACTTGCAAGTGCAGGTTTCTACTATACAG-GT-----AAGAAACTTAAAA---------

--------------------------------------------------------------------------------

--------------------------------------------------------------------------------

--------------------------------------------------------------------------------

--------------------------------------------------------------------------------

----------------CCTGGTCATTTACAAAATTCACC-----TGTTTTGTGTTATACATGTTAGTGGACAAATGATAT

GTATTCGTAAATTCTGGTTTAAAAT-------------TAATTTC-----AG-GTCACAGTGATGATGTCAAATGTTTTT

GCTGTGATGGTGGACTGAGATGT

>Castor_canadensis

TGTTCCAGTTCAGCCTGAGCAGCTTGCAAGTGCTGGTTTTTATTATGTGG-GT-----AAGAAACTAATTG---------

--------------------------------------------------------------------------------

--------------------------------------------------------------------------------

--------------------------------------------------------------------------------

--------------------------------------------------------------------------------

---------------------GTAGCTATACATTTTATT-------GTTTGTTTTATGTAT---------TAGAACATAC

GTATAGCCAGTTTTTGGCCTTTTTTCTC----------TCCCTTT-----AG-ATCGAAATGATGATGTCAAATGCTTTT

GTTGTGATGGTGGCTTGAGGTGT

>Cavia_porcellus

GGTTCCAATTCAGCCTGAGCAGCTTGCAAGTGCCGGTTTTTATTATGTTG-GT-----AAGAAACTAATAA---------

--------------------------------------------------------------------------------

--------------------------------------------------------------------------------

--------------------------------------------------------------------------------

--------------------------------------------------------------------------------

---------------------ACAGCTGTACATTTTATC-----TAGTTCATTCTGATTAT---------TGGAACATGT

GT-----TAGTTTTTTGTCTTTGTTT------------TCCCTTC-----AG-GTCGCAATGATGATGTCAAATGCTTTT

GCTGTGATGGTGGCTTGAGGTGT

>Homo_sapiens

TGTTCCAGTTCAGCCTGAGCAGCTTGCAAGTGCTGGTTTTTATTATGTGG-GT-----AAGAAGCAAATAA---------

--------------------------------------------------------------------------------

--------------------------------------------------------------------------------

--------------------------------------------------------------------------------

--------------------------------------------------------------------------------

-------------------------CTATACATTTTATC-ATTTTATTTTAATTTACATAT---------TAGAACATAC

GTGTTTTCAATATTTAGTCTTTTTT-------------TTCCTGA-----AG-GTCGCAATGATGATGTCAAATGCTTTT

GTTGTGATGGTGGCTTGAGGTGT

>Bos_taurus

TGTATCAGTTCAGCCCGAGCAGCTTGCAAGTGCTGGTTTCTATTATGTAG-GT-----AAGAA---AATGT---------

--------------------------------------------------------------------------------

--------------------------------------------------------------------------------

--------------------------------------------------------------------------------

--------------------------------------------------------------------------------

---------------------ATAGCTATACATCTTATGTAGTTCATTTTGATTAATATAT---------TGGAACACGT

GTGTATTCAGTTATTGTGT-------------------TTTCTTT-----AG-GTCGCAACGACGATGTCAAGTGCTTTT

GTTGTGATGGTGGCTTAAGGTGT

>Loxodonta_africana

TGTTCCAGTTCAGCCTGAGCAGCTTGCAAGTGCCGGTTTTTATTATGTGG-GT-----AAGAAACTAATAT---------

--------------------------------------------------------------------------------

--------------------------------------------------------------------------------

--------------------------------------------------------------------------------

--------------------------------------------------------------------------------

---------------------GTAGCTATACAT-TTGTCTAGTTCATTTTGATCTACTAAC---------TAGAATATAT

GTGTATTCGGTTTTGGTCTTTATTTT------------TTTTTTT-----AG-GTCGCAACGATGATGTCAAATGCTTTT

GTTGTGACGGTGGCTTGAGGTGT

**IL27**

>Mus_musculus

AAAACCTGGAGGAGGAAGCCATCATCATGAAGGATGTGCCCAACTGGAAG------------------------------

--------------------------------------------------------------------------------

--------------------------------------------------------------------------------

--------------------------------------------------------------------------------

GTGGGCGAGTCTGTGTTCCATACCACACGATGGGTGCCACCCCTCATTGG

>Mus_spretus

AAAACCTGGAGGAGGAAGCCATCATCATGAAGGATGTGCCCAACTGGAAG------------------------------

--------------------------------------------------------------------------------

--------------------------------------------------------------------------------

--------------------------------------------------------------------------------

GTGGGCGAGTCTGTGTTCCACACCACACGATGGGTGCCACCCCTCATTGG

>Rattus_norvegicus

AGAACCTGGAGGAGGAGGCTATCATCATGAAAGATGTGCCCAACTGGAAG------------------------------

--------------------------------------------------------------------------------

--------------------------------------------------------------------------------

--------------------------------------------------------------------------------

GTGGGGGAGTCTATGTTCCATACCACACGATGGGTGCCACCCCTCATCGG

>Cricetulus_griseus

AGAACCTGGAGGAGGAGGCCATCATCATGAAAGATGTGCCTGACTGGAAG-GT-----GAGTC-----------------

----------------------------------------------------------------------------CAGG

GTGGGGGT-------AGGGTG--GGGTGGGGTGGGGTGGGGTGGGGTGGCGGCCAGGG------TCAGGGGG---ACTGC

-------------------TGAGGAC---------------TGACCCTGCTCCTGCCCTT-----------------AG-

GTGGGTGAGTCTGTCTTCCACACCACGCGCTGGGTGCCGCCTCTCAACTC

>Microtus_ochrogaster

AGAACCTGGAGGAGGAGGCCATCATCATGAAAGACGTGCCTGACTGGAAG-GT-----ACGCT-----------------

----------------------------------------------------------------------------CTGG

GTT------------GGGGTA--GGGTGGGGTGGGATGGCATGGTGTGGCCA--------------GCTGGG---ACTGA

-------------------TAAGGAC---------------TGACCCTGACCCTGACCCTGACCCTGCCCAC-----AG-

GTGGGTGAGTCTATGTTCCACACCACGCGCTGGGTGCCGCCCCTCCCCAG

>Nannospalax_galili

AGAATTTGGAGGAGGAGGCCATTATCATGAAGGACGTGCCGGACTGGAAG-GT-----GGGTC-----------------

---------------------------------------------------------------------------CCAAC

ATCCCTAG-------TGGGTG------GGGCAGAACCACTGGCTGAGGACTA--------------ATTGGG---ACTGA

-------------------------------------------CCGCCACCCCTGCTTGT-----------------AG-

GTGGGAGAGTCTGTGTTCCACACGACACGCTGGGTGCCACCGCTGCTCGG

>Jaculus_jaculus

AGAACTTGGAGGAGGAGGCTGTTATCATGAAGGACGTGCCCGACTGGAAG-GT-----AGGTC-----------------

----------------------------------------------------------------------------CGGG

ATAA-----------AGGGCG---------------------GGGGAGACAGCGACTGACGCACGCTTGGTA---ACCCA

---------------------------------------------CGCCGCCTTGCCCTG-----TTCCCAC-----AG-

GTGGGTGAGTCTGTGTTCAACACGACGCGCTGGGTGCCACCGGCCATAGG

>Castor_canadensis

AGAACCTGGAGGAGGAGGCAATCATCATGAAGGACGTGCCCAACTGGAAG-GT-----GGGTC-----------------

------------CGCAGAGG----------GGAGCTGCGGAGCTC-------------------------------CTGA

GCCCGCACGG-----GGGCCGCCAGTCGTGGGGGGTCAGGAGGAGGGGGTT-------------------GG---ACTGA

---------------------------------------------------GTGGCCCCT--TACTCCCCAC-----AG-

GTGGGCGAGTCCGTGTTCAACACGACGCGCTGGGTGCCGCCGCTGATCGG

>Cavia_porcellus

AGAACCTGGAGGAGGAGGCCATCATCATGAAGGACGTGCCGGGCTGGAAG-GT-----GTGTA------------GCCCG

CCCCCCAACCCCCCC-------------------CCCACGTCCCCCCGCCCCCTCCCC------------------CAGA

GT-------------GGGGTG----------------AGGGGGGCAGGGCCG------------GCGAGGGA---GCCTC

---------------CTCCTTGAGTC------------------CTTCGTCCTTGTCCCC-----------------AG-

GTGGGCGAGTCCACATTCCACACCACGCGCTGGGTGCCCCCGCTTATCGG

>Homo_sapiens

AGAACCTGGAGGAGGAGGCCATCATCATGAAGGACGTGCCCGACTGGAAG-GT-----GGGTCCCGGCTGGGAGGGCAGA

GGTGCCAGCCACGGCAGAGACAGGGCCT--GGGGTTGGGGAGCTCCCACAGCTTTCTA------------------TAGA

AACCCCAGGACCAAGGGGGTGGTGGGTGCCAGGTCCCACAAGGGAAGGCTGTAGCGCCTGCCACGCACAGGGGCCACTGA

TCCTGGGGGATGGGTCCTAGCAGGCTGTATATGGGTGGCTGTGCCTCTACCCATACCCCA--CTGTCCCCAC-----AG-

GTGGGGGAGTCTGTGTTCCACACAACCCGCTGGGTGCCCCCCTTGATCGG

>Bos_taurus

AGAACTTGGAGGAGGAGGCAACTGTCATGAAGGATGTGCCGGGCTGGAAG-GT-----GGGTC-----------------

---CTCAGCCCCCCACGGTCCAAGCCGCTGCAGAAACACAGCCTCCCA----------------------------CAGA

AAATACAGGGCTTTGGGGGAG--TGGTGCCAGGTGCCAGAAGGGGGAGGCTATTCAGGGTAGAGGCACAGGG---GCTGC

CAGTCCTGGTGGGGTCCCAGCAGGCT------------CATGAGACCTACCCATACCCCT--TCATCCCCAC-----AG-

GTGGGTGAGTCCGTGTTCCACACCACGCGCTGGGTGACTCCCATGATGGG

>Trichechus_manatus

AGAACCTGGAGGAGGAGGCCATCATCATGAAGGACGTGCCTGACTGGAAG-GT-----GGGTC----CTGGTGGGGCCCA

GGCTCCAGGGCCCACAGAGACCCGCCCATTGGGGCTCACCGTCTCCCAGAGACCTCGTAATCGAGTCACAAGTGGCCAGG

ATTGCCAGGGGCTAAGGGGTG--TAGTGGGTTGGGGGAGGTGGCACCGCCCAAGCTGGG-----GGAGGGGG---ACTGC

------------GCCCCCAGCATGCC---------------TGCCCATACCCTGGTCCCT----------GC-----AG-

GTGGGCGAGTCAGTGTTCCACACGACACGCTGGGTCCCTCCCATGGTGGG

**IL28**

>Mus_musculus

CCAGCTGGCCCTGGAGTCTCCCAAGGGCCGGGGCACTGTGCTCCTGTCTG------------------------------

--------------------------------------------------------------------------------

--------------------------------------------------------------------------------

------------------------------------------GTCCTCGGAAGGGCCGAGAGGTGTACCGACATTTTGGC

AAGGCCCCAGGAACCCCACACAGCCATACCAA-GT-----GAGTA------TCAGAGCTTTGGCTTC-------------

-------------------------AGGTAGTTGTTACCC---------------ATAGTGGCCAC-TAG---GA-----

----TG---------------------------------------------------------------------TCAAG

TTCACTTGGGTGGGGGGTGGTCACAAATCTGGGCTAGCCAGGGCCTCTGC---C-A-CTTCTGAGGGG------------

------------------------------TGAGTGGTTATTGCGAAGGCT---------CTCAGAA--------GGTTT

CCAGTA--------TGACA------------------------------------------GG---------------AA

CAGGTC-----CTAGTGCC--------------AATGAGCT----------GG-ACTTC---------------------

-------------------TCTAAC-C-----TCCCTCC-TTTCCCCAC-----AG-ACCCTATGTCCGTTCCAAGGGCC

GGAAGTTTGAGCGCGCCAGAGGCCGAA

>Mus_spretus

CCAGCTGGCCCTGGAGTCTCCCAAGGGCCGGGGCACTGTGCTCCTGTCTG------------------------------

--------------------------------------------------------------------------------

--------------------------------------------------------------------------------

------------------------------------------GTCCTCGGAAGGGCCGAGAGGTGTACCGACATTTTGGC

AAGGCCCCAGGAACCCCGCACAGCCATACCAA-GT-----GAGTA------TCAGAGCTTTGGCTTC-------------

-------------------------TGGTAGTTGTTACCC---------------ATAGTGGCCAC-TAG---GA-----

----TG---------------------------------------------------------------------TCAAG

TTCACTTGGGTGGGGGGTGGTCACAAATCTGGGCTAGCCAGGGCCTGTGC---C-A-CTTCTGAGGGG------------

------------------------------TGGGTGGTTATTGCGAAGGCT---------CTCAGAA--------GGTTT

CCAGTA--------TGACA------------------------------------------GG---------------AA

CAGGTC-----CTAGGACCTAGGTGTTGGTCCTAATGAGCT----------GG-GCTTC---------------------

-------------------TCTAAC-C-----TCCCTCC-TTTCCCCAC-----AG-ACCCTATGTCCGTTCTAAGGGCC

GGAAGTTTGAGCGCGCCAGAGGCCGAA

>Rattus_norvegicus

CCAGCTGGCCCTGGAGTCTCCCAAGGGCAGGGGCACTGTGCTCTTGTCTG------------------------------

--------------------------------------------------------------------------------

--------------------------------------------------------------------------------

------------------------------------------GTCCTCGGAAGGGCCGAGAGGTGTACCGACACTTTGGC

AAGGCCCCAGGAACTCCACACAGCCACACCAA-GT-----GAGTA------GTGGGGCCTTGTCCTT-------------

-------------------------CGGTAGCTGTTAGCC---------------CTGGTGGCCAC-CAGCGTGT-----

----TG--------------------------------------------------------------------------

-TTTACTTGGTGGGGGGTGGTCACGA--CTGGGCTAACCAGGGCCTGTAC---C-A-TTTCCGAGGGG------------

------------------------------CGGGTGGTTACTGGGAAGACT----CAGCTCAGAAGA--------GCTTC

TCAGTG--------TTAGA------------------------------------------GG---------------AA

CAGGTC-----CCAGTGGC-------------CACTGAGCT----------GA-GC------------------------

-------------------TCTCAC-C-----TTCCTCC-TTTCCCCAC-----AG-ACCCTATGTCCGTTCCAAGGGCC

GGAAGTTCGAGCGTGCCAGAGGCCGAA

>Cricetulus_griseus

CCAGTTAGCTCTGGAGTCTCCCAAGGGCCGTGGCACTGTGCTCTTGTCTG-GT-----AAGTGAGGGCTATATTGAAGCA

CCT---------------------------------------------AGGTTTGGGGAACAT-----------------

--------------TCCCTGAGG---------TCA--GAAAGTTC-----------------------------CTGGTC

TCTACTTAACCT----CTTCTT--CCCTGGCC-------AG-GTCCTCGGAAGGGCCGAGAGGTATACCGGCATTTTGGC

AAGGCCCCAGGAACACCACACAGCCATACCAA-GT-----AAGTATCAGGCTAAGAGCTCAGGCTTTGTCTCC-------

-------------------------TGGTAGTTTTTAGCC---------------ACAACG------------GG-----

----TG--------------------------------------------------------------------------

--------------------------GTCATAACTGGACTTCCTCTGTGC---C-GACCTCTGACTGG------------

------------------------------CAGGTGGTCCCCGTGAAAGCC---------CACAGAG--------GTTTC

CTAGCG--------TTACA------------------------------------------GA---------------AA

CATGCC-----CCATTGGC------------ACTGTGAACT----------GG-CCATC---------------------

-------------------TCTCAC-C-----CACATCT-TTTTCCCAC-----AG-ACCCTATGTCCGCTCCAAGGGCC

GGAAGTTCGAACGTGCCAGAGGCAGAA

>Microtus_ochrogaster

CCAGCTGGCCTTAGAGTCTCCCAAGGGCCGTGGCACTGTGCTCCTGTCTG-GT-----AAGTAAGGGCTGCTTTGGCGTG

CCA---------------------------------------------AGGTTTGGGG----------------------

----AGCCTTCCGTCGTTAGAGT---------TT----------------------------------------TTGGTC

TCTGCTTAACTT----CTCCTT--CCCTGGCC-------AG-GACCTCGGAAGGGCCGAGAGGTGTACCGGCATTTTGGC

AAGGCCCCAGGAACCCCACACAGCCATACCAA-GT-----GAGTATCAGGCTAAGGACTCAGGCTTTGTCCCCT------

-------------------------GTGTAGCTTTTAGCT---------------GCAGTGGC-----------------

----TG--------------------------------------------------------------------------

--------GTAGGGGGTTTGTCACAGCTAAGGGCTACCCAGAGCCTGTGC---CAAACTCTTGATTGG------------

------------------------------CATGTGGTC-CCATGAAGGCTCTCCTAACCCAGAAGA--------GTTTC

CCAGCA--------TTACA------------------------------------------GG---------------AA

CAGGCC-----CTGTTGGC-----------CTCTGTAAGCT----------GG-GCTTC---------------------

-------------------TCTGAC-------CCAAACCTTCTCCCCAC-----AG-ACCCTATGTCCGCTCCAAGGGCC

GGAAGTTTGAACGTGCCAGAGGCAGAA

>Nannospalax_galili

CCAGCTGGCCCTGGAGTCTCCCAAGGGTCGAGGCACCGTGCTCCTGTCAG-GT-----GAGTGGGGGCTGCACAGAAACT

CCT---------------------------------------------GAGGTTGGGTGTTTTTACCTCGCTCCC-----

-AGTGATCCTCAGCCCTGTGAGGAACAGTTTCCTCCAGGCAATCAAAATCC-----------------------CTGGTT

CTTGCCTGACCTACCTCT------CCCTGGCC-------AG-GTCCCCGGAAGGGCCGAGAGGTTTACCGGCACTTTGGC

AAGGCCCCAGGAACTCCGCACAGCCACACCAA-GT-----GAGTA------TAAGGCTGCAGGCTTC-------------

----------------------------CTGCAATTAGTC---------------ACAGTGGCCAC-TGG---GG-----

----TG--------------------------------------------------------------------------

--------------------------------------------TTGGGC---T-CACTGGGGTGGGG------------

------------------------------CAGCTGCAG---------------------CTTGGGG--------GCT--

--------------CTGCA------------------------------------------GG---------------AT

CGGGTG-----GTAAGGGC-----------CACTATGGTCA----------GG-GCTTC---------------------

-------------------TCTCAC-C-----CTCCTCC-TCTGCCCAC-----AG-ACCCTATGTCCGCTCCAAGGGCC

GGAAGTTCGAGCGTGCAAGAGGCCGAA

>Jaculus_jaculus

CCAGCTGGCCCTGGAGTCCCCCAAGGGCCGTGGCACTGTGCTGCTATCTG-GT-----GAGTGGGGCTGCTTG-------

------------------------------------------------GTGGCTGGCATCCTTAGCT-------------

------TGTCTGGCCCTGTGGGG---------TT---GGAAGAA------------------------------CTCGAT

CTTTCTTATCCC-------CTT--CTCTGACC-------AG-GTCCTCGGAAAGGCCGGGAGGTGTACAGGCATTTTGGC

AAGGCCCCAGGAACCCCACACAGCCACACCAA-GT-----AAGTG-----------------------------------

-------------------------------------TCC---------------AGA----------------------

----TG--------------------------------------------------------------------------

----------------------------------------------------------CTCCCTGGGC------------

-----------------------------ACGGGTGGTT--GGCAGC-------------CTCAGTG--------GAGAC

CCAGTG--------CACTA------------------------------------------GA---------------AA

GAAACA-----TTGTGGTC--------------------------------AT-GCTCC---------------------

-------------------TGTTTTGT-----TTCCTCT-----CCCAC-----AG-ACCTTATGTCCGCTCCAAGGGCC

GGAAGTTCGAGCGTGCTAGAGGACGGC

>Castor_canadensis

CCAGCTGGCCCTGGACTCCCCCAAGGGCCGCGGCACCGTCCTGCTCTCTG-GT-----GAGTGAGAGTTGCCTTGTGGCT

CCCATCCCATGGGTGGGTGGTGTGAGCTGTGTGGGTGCTGGGCCTCGGTGGTCAGGGACACATGCCCATTTCACACTGCA

CACTTGTCTTCAGCCCTGTGGGG---------TTGAAGGAAGAG------------------------------CAGCTG

TGTGCCTGACCCATCCTTTCCT--TCC------------AG-GTCCCCGCAAGGGCCGGGAGGTGTACCGGCATTTTGGC

AAGGCCCCAGGAACCCCACACAGCCACACCAA-GT-----GAGTA------TGGGAGCTACTGCAGG-------------

-------------------------------------------------------ACAGCGGCCACACAGTGGGG-----

----TG--------------------------------------------------------------------------

--------------------------------------------TTGAGC---C-CCCT------GGG------------

------------------------------CGGGTGGTG-CTGCA---------------CCTACTG--------GCTG-

------------------------------------------------------------------------------GC

CAGGGC-----CTGCTGTA-----------------GACCT----------TG-GCTTC---------------------

-------------------ACACTCAC-----CTGCTCC-TCTCCCCAC-----AG-ACCCTATGTCCGATCCAAGGGCC

GGAAGTTCGAGCGAGCCAGAGGCCGAC

>Cavia_porcellus

CCAGCTGGCCCTGGAGTCCCCCAAGGGCCGAGGCACAGTCCTGCTCTCTG-GT-----AAGTGGCACTTGGTG-------

------------------------------------------------GAGGTCAGGGTGTGT---------CCC-----

-AGTTCCGCTCAGCCCTGTGAGG---------GTT--GAAGGGGGTGGGTGGCTTCCTGCAGGTGGTTGAGGTGCAGGAC

CCTGCTGATCCC------TTGC--TCCTGTCCCC-----AG-GTCCACGCAAGGGCCGAGAGGTGTACCGGCATTTCGGC

AAGGCCCCTGGAACCCCACACAGCCACACCAA-GT-----AAGTA-----------------------------------

--------------------------------------------------------CAGGGCCTGC-TGG----------

----TG--------------------------------------------------------------------------

---------------------------------CCCCCCTTCATCCCTGC---C-ACCCATTGTGGG-------------

------------------------------TGGGGGGTGAGCACAGCTGG----------CTTTGAG--------GGT--

-CAGGC--------TGGAA-----------------------------------------------------------AC

CAGGGC-----CTGCTGCT-------------GTGTAAGAT----------GG-GCTTC---------------------

--------------------------T-----CCCTTAC-TCTTCCTAC-----AG-ACCCTATGTCCGCTCCAAGGGCC

GGAAGTTCGAGCGCGCCAGAGGCAGAC

>Homo_sapiens

CCAGCTGGCCCTGGACTCCCCTAAGGGCTGTGGCACTGTCCTGCTCTCCG-GT-----GAGTGATACGTGGTCGACGGGT

T-----------------------------------------------TGGACTGAGCTGTGTGGCTACT----------

-GGCAGCCTTCACCCTCCTGGAT---------CTG--GGAGGCCAGAAGCTGGGCGC-----------------CAGATC

CCTGTCTCACCCGGTTCTCCTT--CCCCTTCCCT-----AG-GTCCTCGCAAGGGCCGAGAGGTGTACCGGCATTTCGGC

AAGGCCCCAGGAACCCCGCACAGCCACACCAA-GT-----GAGTATCAGGCCCCCAGCCCTGCCCTCTCCCCAGACTCAG

CCTGCAGGGCCAGGCCTGGCCACACTTGGGCTGCTTCTCCTATCCCTCGTACCAGCCAGCCCCAGGCCTTCTGGAACTCT

CAGCTG---------------------------------------------------CCTCATCCTGCCTGCTTTTCCCT

TCAACACTGCTTGGAG------------CTGTGTTTTCCAGGGCCTGAGCAGGC-ATCTCCTGGGGAGCATGCAGTTCAC

CGGCCTTTGCCAGCCCAGGCTGGGACCCTCCAGGTGGTG-GGGCAGGTGCTTCCATAGCCCCTCCTG--------GCTCC

TTGGCTTCCCACTCTGCCAAGCTTTTCCAGCAGCATTGACTCTCCTGGGGCTGAATGT--------------------GA

CAGGCTT----GTGGTGTTCCTGTGCCACTCCACAATGGCCTCCTTTAAGAGG-GCCCC---------------------

-------------------CCTCTCAC-----TCCCTCC-TCTCCCCAC-----AG-ACCCTACGTCCGCTCCAAGGGCC

GGAAGTTCGAGCGTGCCAGAGGCCGAC

>Bos_taurus

CCAGCTGGCCCTGGACTCCCCCAAGGGCTGTGGCACTGTCCTCCTCTCTG-GT-----GAGTGGCTCTA-----------

------------------------------------------------GGGGCCGGGCCATGGGGCTCCT----------

--GCAGCCTTTCCCTTTCTGGGT---------CTG--GGAGGTCAGGGACAGCCCTCCCCCACACCCCAG----CCCGGA

TCAGCCTGAGCCACCCCTTCCT--CCCCTTCCCT-----AG-GTCCTCGTAAGGGCCGAGAGGTGTACAGGCATTTCGGC

AAGGCCCCAGGAACCCCGCATAGCCACACCAA-GT-----GAGTA---TACCCTGCACGTCGGCCTCGCCATGCTTCCAG

CTATTTCTGTCAGCCTAG-------AATCTCCGCTTTTCC---------------TTCATGGCTTTGCTTAAAGCTCTGT

TGTTTG-------------------------------------------------------------------GGTATTG

AGCTTCCTGCCCAGCCAGCATCACTGGTGTGGGTTCTTCAGGGCCTGTCC---C-CCCTCGGGTGGGGCCTGCATCTTGT

CCAGCT-------------CTGGGGCGCCCTGGTTGACACCCCCAGGGCCTAGTGGAGGCCCTTCAGCCACTCCTGGCCA

CTGGCTTCCTGCGCTGCCAGGCTTTCCTGCTGATCCTGCCTCAGTTGA------------------------------GT

GAGGCCCTCTGCTGGTGTCCCCGTGCTGCTCTGTTAGAGCA----------GATGTTTCTCAACTCCCAACTGGCTGGCA

GGCCCCAGCAGCCCCTGACTCTCTAACATGGGCCCCTTC-TCTCCCTGC-----AG-ACCCTACGTCCGCTCCAAGGGCC

GGAAGTTCGAGCGTGCCAGAGGCCGAC

>Loxodonta_africana

CCAGCTGGCCCTGGACTCCCCTAAGGGCTGTGGCACTGTCCTGCTCTCTG-GT-----GAGTGACGCTTCAGTGGCTG--

CCGGCCTCGTGGGGGGCTTTCGGGGCTGGATATGAGAGCGAGAGGTCCTGGAGTGAGCCATGTGACTCCT-------GGG

AGGCTGGGCCCTTCCCTGTG-----------------TAAGGTGAGGTGT------------------------CTGGTC

CTTGCCTGACCCACCCGCTCTGTACCCTTTTCCC-----AG-GTCCGCGCAAGGGCCGCGAGGTGTACAGGCATTTTGGC

AAGGCTCCAGGAACCCCGCACAGCCACACCAA-GT-----GAGTA------GTAGGCCCCTGCCCCTCCTGCCC------

------CTTCCATCCCCATAGCCCAGCACTGTTCTTTCCC---------------CTAGCAGGCAG-CTGCGAGGCCTGC

CAGCTGCTTCTGCTGTTTTGCTCCCTGACTCACCCTTGGGCCTCCAGAGGACTACCATCTCACGTTACTCACTCTTTTCT

TCAGCTTAATTCTGCTTTTTGAAGCGTTGCGCTCAGGCCAGTGCCTGAGC---C-AGCATCTGTGGGG--------CCCT

GCATTT-------------GGCCCAGCCTCAGGCCGGTT-CAGTGAGAGTCACCAGGGCAGCTGGAG--------GCTCA

ACAGCCACCCC---TGAAA---TCGAATTGTCACCCTGACCCTTCTTGGGTTGAGTTGGGTGCTTTCTGGGGTCCCTGTG

CCGGCC-----ACTTGTACCACATCTAGCTTACTCTGCTCT----------GG-GTTCCTTAAAGGCCACCTTGTGCCGC

TGACCTCTGTAAAATGAGTTCACTCAC-----TTTCTCCGTCTCCCCAC-----AG-ACCCTATGTCCGCTCCAAGGGCA

GGAAGTTCGAGCGTGCCAGAGGCCGAC

**IL29**

>Mus_musculus

ACAACCCCTTTGGAGACAACAACCTGCTCGGCACCTTCATCTGGAACAAG------------------------------

--------------------------------------------------------------------------------

--------------------------------------------------------------------------------

--------------------------------------------------------------------------------

--------------------------------------------------------------------------------

--------------------------------------------------------------------------------

--------------------------------------------------------------------------------

--------------------------------------------------------------------------------

--------------------------------------------------------------------------------

--------------------------------------------------------------------------------

--------------------------------------------------------------------------------

--------------------------------------------------------------------------------

--------------------------------------------------------------------------------

--------------------------------------------------------------------------------

--------------------------------------------------------------------------------

--------------------------------------------------------------------------------

--------------------------------------------------------------------------------

--------------------------------------------------------------------------------

--------------------------------------------------------------------------------

--------------------------------------------------------------------------------

--------------------------------------------------------------------------------

--------------------------------------------------------------------------------

--------------------------------------------------------------------------------

--------------------------------------------------------------------------------

--------------------------------------------------------------------------------

--------------------------------------------------------------------------------

--------------------------------------------------------------------------------

--------------------------------------------------------------------------------

--------------------------------------------------------------------------------

--------------------------------------------------------------------------------

--------------------------------------------------------------------------------

--------------------------------------------------------------------------------

--------------------------------------------------------------------------------

--------------------------------------------------------------------------------

--------------------------------------------------------------------------------

--------------------------------------------------------------------------------

--------------------------------------------------------------------------------

--------------------------------------------------------------------------------

--------------------------------------------------------------------------------

-------------GCCTTGGAGAAGAAGGGCATCAGCCACCTGGAGGAGAAGGAGCTGAAGGA

>Mus_spretus

ACAACCCCTTTGGAGACAACAACCTGCTGGGCACCTTCATCTGGAACAAG------------------------------

--------------------------------------------------------------------------------

--------------------------------------------------------------------------------

--------------------------------------------------------------------------------

--------------------------------------------------------------------------------

--------------------------------------------------------------------------------

--------------------------------------------------------------------------------

--------------------------------------------------------------------------------

--------------------------------------------------------------------------------

--------------------------------------------------------------------------------

--------------------------------------------------------------------------------

--------------------------------------------------------------------------------

--------------------------------------------------------------------------------

--------------------------------------------------------------------------------

--------------------------------------------------------------------------------

--------------------------------------------------------------------------------

--------------------------------------------------------------------------------

--------------------------------------------------------------------------------

--------------------------------------------------------------------------------

--------------------------------------------------------------------------------

--------------------------------------------------------------------------------

--------------------------------------------------------------------------------

--------------------------------------------------------------------------------

--------------------------------------------------------------------------------

--------------------------------------------------------------------------------

--------------------------------------------------------------------------------

--------------------------------------------------------------------------------

--------------------------------------------------------------------------------

--------------------------------------------------------------------------------

--------------------------------------------------------------------------------

--------------------------------------------------------------------------------

--------------------------------------------------------------------------------

--------------------------------------------------------------------------------

--------------------------------------------------------------------------------

--------------------------------------------------------------------------------

--------------------------------------------------------------------------------

--------------------------------------------------------------------------------

--------------------------------------------------------------------------------

--------------------------------------------------------------------------------

-------------GCCTTGGAGAAGAAGGGCATCAGCCACCTGGAGGAGAAGGAGCTGAAGGA

>Rattus_norvegicus

ACAACCCCTTTGGAGACAACAACCTGCTGGGCACTTTTATCTGGAACAAA------------------------------

--------------------------------------------------------------------------------

--------------------------------------------------------------------------------

--------------------------------------------------------------------------------

--------------------------------------------------------------------------------

--------------------------------------------------------------------------------

--------------------------------------------------------------------------------

--------------------------------------------------------------------------------

--------------------------------------------------------------------------------

--------------------------------------------------------------------------------

--------------------------------------------------------------------------------

--------------------------------------------------------------------------------

--------------------------------------------------------------------------------

--------------------------------------------------------------------------------

--------------------------------------------------------------------------------

--------------------------------------------------------------------------------

--------------------------------------------------------------------------------

--------------------------------------------------------------------------------

--------------------------------------------------------------------------------

--------------------------------------------------------------------------------

--------------------------------------------------------------------------------

--------------------------------------------------------------------------------

--------------------------------------------------------------------------------

--------------------------------------------------------------------------------

--------------------------------------------------------------------------------

--------------------------------------------------------------------------------

--------------------------------------------------------------------------------

--------------------------------------------------------------------------------

--------------------------------------------------------------------------------

--------------------------------------------------------------------------------

--------------------------------------------------------------------------------

--------------------------------------------------------------------------------

--------------------------------------------------------------------------------

--------------------------------------------------------------------------------

--------------------------------------------------------------------------------

--------------------------------------------------------------------------------

--------------------------------------------------------------------------------

--------------------------------------------------------------------------------

--------------------------------------------------------------------------------

-------------GCCTTGGAGAAAAAAGGCATCGGTCACCTGGAGGAAAAGGAGCTGAAGGA

>Cricetulus_griseus

ACAACCCCTTCGGCGACAACAACCTCCTGGGCACCTTCATCTGGAACAAG-GT-----GAG-------------------

--------------------------------------------------------------------------------

--------------------------------------------------------------------------------

----------------------------------------TGCTCCACCCTGA---------------------------

--------------------------------------------------------------------------------

--------------------------------------------------------------------------------

--------------------------------------------------------------------------------

--------GCAGCC------------------------------------------------------------------

----------------------------------------AGGTGCTATGATGT--------------------------

----------------------------CCTGAG----------------------------------------------

--------------------------------------------------------------------------------

--------------------------------------------------------------------------------

--------------------------------------------------------------------------------

--------------------------------------------------------------------------------

--------------------------------------------------------------------------------

--------------------------------------------------------------------------------

--AGGACGCCT---------------------------------------------------------------------

--------------------------------------------------------------------------------

------------------------------CCCTGCCTCAG---------------------------------------

--------------------------------------------------------------------------------

------GGCCTTTGTC----------------------------------------------------------------

------------------------------CTGCTGTTCCTTCA----------------------G----CCCAGCTC-

-----------------------------------------------------------------------CTTGCT---

-----------TGTGGTTCTTGTCC---TCCAG----------------------------------GGCTCCCCTGACT

CTCAG---------------------------------------------------------------------------

---------CCCTTCTCAGGGAGGCCGTCCTGAC-CCTTGTAGCCTAGACCCCCCACGGCGTCT--------CTCA-AAG

TGCTGTTACTG--------------------------------------------CT-GTGCTTGTCACTGTGTGACAAG

CACCTGTGCAGGTGCCAGGCTCAGC-------------------------------------------------------

----------------------------TGCACTG----------------------------TGGGGTAGC--------

----------------------------------------------------------------AAGGCACCCTTGCACA

CTT---GTGC-----------ATCAGAGAGCACATGGTCAAA-----------------------------------CAA

CAGCTGTT------GGGTGATGC----------------------------------GCAGAGCTC--------------

---------------------------------------CAGGGCTGCTTC-----------------------------

--------------------------------------------------------------------------------

---------------------------TGGGAGAAGAGCTGGCCCCAGGCACCTTCCTACCATGGA-------GACCCCT

G-GCAGCTCTGGT---------CTGGATCCCCAAGT--------------------------------------CCTTAC

TCT--------------------------------------------------------------GTTGTCTTCCCTGCA

AGCCTGGTAGAACA----CTAGGCACTGTGGGACCCTGCTGGTGG-----------------------------------

-------------------CTGAGTGGGTCTGGCTGCT------------------------------------------

TCCAC-----AG-GCACTGGAGAAGAAGGGCATCAGCCACCTAGAAGAGAAGGAGCTGAAGGA

>Microtus_ochrogaster

ACAACCCCTTTGGAGACAACAATCTGCTTGGCACCTTCATCTGGAACAAG-GT-----GGG-------------------

--------------------------------------------------------------------------------

--------------------------------------------------------------------------------

----------------------------------------TGCTGCAGGCTCA---------------------------

--------------------------------------------------------------------------------

--------------------------------------------------------------------------------

--------------------------------------------------------------------------------

--------GCAGCC------------------------------------------------------------------

----------------------------------------AGGGGCTGTGATGT--------------------------

----------------------------CCAGAG----------------------------------------------

--------------------------------------------------------------------------------

--------------------------------------------------------------------------------

--------------------------------------------------------------------------------

--------------------------------------------------------------------------------

--------------------------------------------------------------------------------

--------------------------------------------------------------------------------

--AGGGACCCT---------------------------------------------------------------------

--------------------------------------------------------------------------------

------------------------------TCCTGCCCACG---------------------------------------

--------------------------------------------------------------------------------

-------GCCTTTGCA----------------------------------------------------------------

------------------------------CTGCTCTCCCTCCA----------------------GC------------

-----------------------------------------------------------------------CTGGCT---

--------------------------------------------------------------------------------

--------------------------------------------------------------------------------

-----------------------------------CCTGGAGCCTTAGCCCCCACAGTGTGCC---------CCCCAGTA

CATTGGC----------------------------------------------------------TCGTTGCCTGCCGTG

CACCCAAGCAGGCTCCAGGCTTAGC-------------------------------------------------TGTGCT

GCCAGCTGCTGTCTCTGAGCCCTGGGGACACCCTG----------------------------CAGGGTACC--------

----------------------------------------------------------------AAGACGTCCTTATACA

CTTTGAAAGC-----------GTCGGAAAGCACAAGGTTAGG-----------------------------------GCA

CAACTCTT------AGGTGACAC----------------------------------GCGGGGCTC--------------

--------------------------------------CTGGGGCTGTC-------------------------------

--------------------------------------------------------------------------------

---------------------------TGGGAGAAGGGCCGACCCCAGGAGCCCTCCTACCATGGACCATGGGGATCTAG

G-GCAGCTTTGGT---------CTCAGTCCTGA-----------------------------------------------

-----------------------------------------------------------------GGCCCCGCCCATTCC

AGCCTGTGAGCACC----CACGGCCACCTCTGGGCACTCTGCTGTCCTCCCTCCAGCACAGTAGACGTGAGGA-------

-------------------CTGAGTGGGTGTGGCTGCT------------------------------------------

TCCAC-----AG-GCTCTGGAGAAGAAGGGCATCAGCCACCTGGAGGAGAAAGAGCTGAAGGA

>Nannospalax_galili

ACAATCCATTCGGGGACAACAACCTTCTGGGTACTTTCATCTGGAACAAG-GT-----GGG-------------------

--------------------------------------------------------------------------------

--------------------------------------------------------------------------------

-----------------------------AACACTCTGCCCCCTCCCCCCTGG---------------------------

--------------------------------------------------------------------------------

--------------------------------------------------------------------------------

--------------------------------------------------------------------------------

-TTGAGTCCCATCCCTGAGCCAG---------------------------------------------------------

----------------------------------------TAGCTCCATC------------------------------

----------------------------CTCGAG----------------------------------------------

--------------------------------------------------------------------------------

--------------------------------------------------------------------------------

--------------------------------------------------------------------------------

--------------------------------------------------------------------------------

--------------------------------------------------------------------------------

--------------------------------------------------------------------------------

--------------------------------------------------------------------------------

--------------------------------------------------------------------------------

------------------------------CCCTGCCCTAG---------------------------------------

--------------------------------------------------------------------------------

-------GCCC---------------------------------------------------------------------

------------------------------TGGCAGTCCCTTTG----------------------ATGGTCACATGCCC

CTTGAAGC---------------------------------------------------------------CTGGCT---

--------------------------------------------------------------------------------

--------------------------------------------------------------------------------

--------------------------------------------------------------------------------

--------------------------------------------------------------------------------

--------------------------------------------------------------------------------

---------------------------------------------------------------TGTGGTGTC--------

-----------------------------------------------------------------------CCCCAC---

-----------------------------------------------------------------------------TGG

CAGCTCTCTTGTGAGTCTGGTTCC---------------------------------CCAGTGC----------------

--------------------------------------------------------------------------------

--------------------------------------------------------------------------------

--------------------------------------------------------------------------AGCTGG

GCACCACAGTAG--------------------------------------------------------------------

--------------------------------------------------------------------------------

--------------------------------------------------------------------------------

-------------------CTCAGTATCCACATCTGAC------------------------------------------

----------AG-GCACTGGAGAAGAAGGGGATCAGCCACCTTGAAGAGAAAGAGTTGAAGGA

>Jaculus_jaculus

ACAACCCCTTTGGGGACAACAACCTGCTGGGCACCTTTATCTGGAACAAG-GT-----AGG-------------------

--------------------------------------------------------------------------------

--------------------------------------------------------------------------------

----------------------------------------CCAGGCACACCAA---------------------------

--------------------------------------------------------------------------------

--------------------------------------------------------------------------------

---------------------------------------------------------------------------GTCAA

CTGTCACTCCAACCATGAGA------------------------------------------------------------

----------------------------------------TAGTTCTA--------------------------------

----------------------------CCCCAG----------------------------------------------

--------------------------------------------------------------------------------

--------------------------------------------------------------------------------

--------------------------------------------------------------------------------

--------------------------------------------------------------------------------

--------------------------------------------------------------------------------

--------------------------------------------------------------------------------

--GGCAAGCCTGTCACA---------------------------------------------------------------

--------------------------------------------------------------------------------

------------------------------CCCTCCCCACC---------------------------------------

--------------------------------------------------------------------------------

--------CCCTATCACAATAAC---------------------------------------------------------

------------------------------CCCCAGTGCCATGG----------------------ACGTCTGTATGCAT

TCTGAGCATAGGACAGC------------------------------------------------------CCTG-----

--------------------TGAGC---CCAGGAGGTG------------------------------------------

--------------------------------------------------------------------------------

-----------------------------------GTGTGCTCTCCAGAGCC----AGGCAGCCAGTATCACCTTCTCAG

TGCTGGGGGTG--------------------------------------------GA-GCAGCCAGTAATGTGGGCTGTG

AAC------ATGGTGCAGGCACAAC-------------------------------------------------------

---------------------------------TG----------------------------TGGGGACCT--------

----------------------------------------------------------------CAAGGGGCTTGTCAGA

TGCACCATGT-----------GTCCTTGTGCTTGCAGCCAAG-------------------------------------G

CAACTGCCTATCCAAAGTGGTCCTCCCCTTGGGGGCTGTGAATTTGAGACACTCC--ACAGGGCTC--------------

-------------------------------CAGGTGAACATGTTTGTCAAGTTCCCTG---------------------

--------------------------------------------------------------------------------

-----------------------------------GGGCCCTTGCCTGGAATTCTGCTGTCCTGAAGCCT---GACCTGC

ATGCTGCCATGCT---------CTCTGCACAAGAGACCAT----------------------------------------

-----------------------------------------------------------------GGTTCCAAGCAGGCT

GCCCTGGGAGCTGCTCGTCCCTCCAGTGTGAGTGCAGAGTGCAGCAGGGTTCCTAGGACAGGCTGGGTTGGCTCACTGAT

ACTGG--------------CCTGGTACCTGGGTCTGATGACCTGCCCCCCC-----------------------------

TCCCC-----AG-GCGCTGGAGAAGAAGGGGATCAGCCACCTGGAGGAGAAGGAGCTGAAGGA

>Castor_canadensis

ACAACCCCTTCGGTGACAACAACCTGTTGGGCACCTTTATCTGGAACAAG-GT-----GAG-------------------

--------------------------------------------------------------------------------

--------------------------------------------------------------------------------

---------------------------------------------CCCGTGGG---------------------------

--------------------------------------------------------------------------------

--------------------------------------------------------------------------------

--------------------------------------------------------------------------------

--------------------------------------------------------------------------------

--------------------------------------------------------------------------------

----------------------------CCAGAG----------------------------------------------

--------------------------------------------------------------------------------

--------------------------------------------------------------------------------

--------------------------------------------------------------------------------

--------------------------------------------------------------------------------

--------------------------------------------------------------------------------

--------------------------------------------------------------------------------

CGGGGGAACCA---------------------------------------------------------------------

--------------------------------------------------------------------------------

------------------------------CCGCTCTCCCA---------------------------------------

--------------------------------------------------------------------------------

-------GCC----------------------------------------------------------------------

------------------------------ATGCTAAGCCTCAA----------------------GCTCGCCCAGCCA-

--TGAAAAGCAGAGCACTTGTCTAGGC--------------------------------------------CCTGTT---

--------------------TGTCT---GCA-------------------------------------------------

--------------------------------------------------------------------------------

-----------------------------------CTGTTATTCCCAGACATGACTCGGG------------CACACGTG

TGCTGGTGGGC--------------------------------------------AC--------------TGGATCGTG

AGGCAGGAAGGGAGCTTGGGATAGA--------------------------------------------GAGTCGGTGGA

GGGAGCTCCAGAACCAGCATCCCTGTGTCCTCCTG----------------------------TGGGCTTTT--------

-----------------------------------------------------CATGGGGGCCAGGGGGATCCTCGCTTA

GGCACTAGGA-----------ACCTGGAGGGAGACAGTTAGA----------------------ATTTCAGTGGCTAGCA

CAGCTGTT------AGGTGACATC---------------------------------AGAGGGTTC--------------

---------------------------------------CAGGTC-----------------------------------

--------------------------------------------------------------------------------

-------------------------------ACATGGGCTCATCATATGCAGCCCCCTA--------------GAGGTGG

A-GCCGGGCTGGC---------ATGGGCC---------------------------------------------------

--------------------------------------------------------------------------------

------------------------------AGGGATCGTTGCT-------------------------------------

-------------------CGGGGGACATGGGTCTGTC------------------------------------------

CTTCC-----AG-GCCCTGGAGAAGAAAGGGATCAGCCACTTGGAGGAGAAGGAGCTGAAGGA

>Cavia_porcellus

ACAACCCCTTCGGGGACAACAACCTGCTGGGCACCTTCATCTGGAACAAG-GT-----GAG-------------------

--------------------------------------------------------------------------------

--------------------------------------------------------------------------------

---------------------------------CGCCTGCGCCTGCCGGCCGG---------------------------

--------------------------------------------------------------------------------

----------------------------------GCCCTAGCACAGCTCCTACCGCTCGGCGGTGCTCGCAGCCGCGTGG

CGAGTGACATGCCTTCAGTTTCTTTTTTTGTTTTTCTGTCATGTTTAG----------------GATGGGGCCTGGTGAT

AGCACTCTGCAGCGTCACGC---------------------------------------------------------TGA

GCTATATTCCCAGCCTTTGTAAACATTTGCATTTTATACGGGATCTCGCCAAATTGCCCAGACTGGGCTTGAAAGC----

------AGGACCCTCCTGTCTCGGCCTTCCAAAGTGCTGAGGTGGCAGGTGTGCACACCAGACTCACCTTAGTAATATTT

TGTGTTCAAAAACTGGTCTTGGTGCTGGAATGGACCCCGGGGCCTCCTTAGCCCGAGCGCCCCATCACCCTACCGCACGT

CCCCTCCGTCTGCCCTGTCACCTTT-------------------------------------------------------

--------------------------------------------------------------------------------

---------------------------------------------------------------------ACTGCTGCTGA

GTGTCACAGTGTGAGCCCTGTCTGCCCAGAACCAGCCTCACCCCGGGATCCCGGGACAGAGGCTGGGCCTGCCCTGGCCC

CGGGTGGGCTCTGGTGGCAGGCCCCGCCCTCTGTGTGTTATTCCATCCCACCTGGCCGCCGAGCCTCGGCCATGGCCACG

GGCAGAAGCCA---------------------------------------------------------------------

----------------------------------------------------------------------GAGGGCTCTG

CTGTCTCAGCACCCCCGGGGTCTGCACAGGGCCTCCCCTGG---------------------------------------

------------------------------------------------------------------GGACTCCAGTGTCC

ACCTCTGGCCTTGGTG----------------------------------------------------------------

------------------------------CGGCTTGGCTTGAG----------------------ATGG--CCAAGCTC

CCTGTACCTCTGCTGCCGCGTAACTATGTCCATCCACATCTCAGTCTCCGTGTGCCCTTCTCTTTTCTCTGTCTGTCCCT

GTCACGCATTGTAAGGGCACTGGCCATGGCGGGAGGCCTCTGCTACCCCATGGCCACTGTCTTCACTGGCACTGCAGACC

TTT-------------------------CCAATGTGGCTTGTTCACATCTTCAGGGAGGACTGGGTGAGGTGGGCAGGGT

CTGGTCCTCACTTAGTGCAGGATACACAGCTGGCTTTGTGGGCCACAGGGCCTTTACACCTGCCTGT-----CCCCTTTA

CCCGGGCACTG--------------------------------------------TC-TTTTTCATC-CTACAGGCC--T

CACCCTTGCCTGTCTTTAGAGCAGC-----------------CGCCCAACCCGCACTCCCTGGGCCTCCATATCCTCATT

GGGGCCCCCATCCACCTGCTGTGCCAGGGCCTCTG----------------------------TGTGGTGGC--------

TGTGCCATGGTCCCCTCCTGTAAGTGGGAAAGTCCCCCAGGCCACAGAGGGGGGTCTTAGGAGCAAGGCATCCCTGTACA

TCCCAGAGGCCGTTTCTCCAGATGTCAGGGGACCTTGCGGGGCCAGTGGGGAGTACAGCCATCACAGTGTTCCCAGGACA

GAGCTCCTC-----AGATGCTGCC-ACTGTGTGAGCTGTGAGTTGGGGAGC------CCTGTGCTC--------------

------------------CTAGCTCCAGGGACCCCATCCTGAGTCTGTGCCATGCCTCGCTGCCCTGCCTCTGCCTGCAC

GGCATGCAGCTGGGGCGCT-------------------------------------------------------------

---------------------------GTGTGCTGAGGCTGCCCCTCAGTGTCCTGCTGC-------------AGCCTGA

GTGCACCCCCGGTCACATGACCCCCACCCCACAAGGCAAGGGGTAGGGCAGCCTCTCAGTACCACAGGCTGACTCGGGAT

------------------------------------------------------------------------CGCCAGCG

GGGACAGGAGAAGA----CACTGAGCCACAGTCACTCTGCAGAGCACACGCCCTGGCCCAGGCCCCAACCCGAGCCGGGC

ACCCTGGCCTCTGTCCCTGAGGGGCGGCCGGGCCCGATTGCTGCACACAGTGGTGAGGTGCTTACACCAGGCTCTGC---

TCCCC-----AG-GCCCTGGAGAAGAAGGGCATCAGCCACCTGGAGGAGAAGGAGCTGAAGGA

>Homo_sapiens

ACAACCCCTTCGGAGACAACAACCTGCTGGGCACCTTCATCTGGAATAAG-GT-----GGGCCCCGCCGGGTGGTGGCCT

CTGTCCCTGTAGCATTTCCACTGTTTCTGGAGACCCCAACACTTGAGACACTCCCAGCCTGCCCTTGATCGTGCAAGAGT

TGGTTTTACACACACACGCATAAGCAAGCTTCTGCCGCTATCAGCTTTCTTTTTTGACACAGGGTCTCGCTCTGTCGCCC

AGGCTGGAGTGAAGTGGTGTGATCTCGGCTCACTGCAAGCTCCACCTCCCGGGTTCATGCCATTCTCCTGCCTCAGCCTC

CTGAGTAGCTGGGGCTACAGGCGCCCGCTACCACGCCCGGCTAATTTTTTGTATTTTTAGTAGAGACAGGGTTTCACCAT

GTTAGCCAGGATGGTCTCGATCTCCTGACCTTGTGATCCACCCGCCTTGGCCTCCCAAAGTGCTGGGATTACAGGCGTGA

GCCACCACGCCCGGCCAGCTTTCTTTTTTGACTCAGGGTCTCGCTCTGTCACCCAGGCTGGAGTGCAGTGGCGTGATCGT

GGCTAACTGCAGCCTTGACCTCCTGGCCTCAAGCGATCCTCCTACCTCAGCGTTTTGACTTGCTGGGACTACAGGCACCA

CCACCATGCCCGGCTAATTTTTTATTTTTTTGTAAAGATGGAGTCTCACTATGTTGGCCAGGCTGGTCTCGAACTCCTAA

GCTCAAGTGATTTTCCCACCTCGGCCTCCCAGAGTTCTGGGATTACAGGCATGAGCCACTGCGCCCAGCCCACCGTCATT

TTCTTGCCATTAACTGTGTCTCTTGCGGTGTAAGCTTCAGCCATTCTTTGCCCCGAACACCAGCCCAACCTGAAACCTAT

CTAGAGAGCCAGCTCTTGGCATCATGTACCCAGGACAGGGTTCCACAGTTCCAGGCGCTCTGTCGTCTGAGCTGGTTCTT

TCGTTCTGCGCCTGCCATTTAGCCACCAGTCACACCAGTGGCATAAGACAACAGAACTTATCATCTCTTCGTTCTGGAGT

CCAGAAGTCCAAAATCAAGGCGTGGGCAGGTGTGGGCAGGACCCCACTCCCTCTGGGGGCCGAGGGGAGGCCCCTCCTGC

CTCTCCCAGCTCCAGTCATGGCCGGTGATTCCTGGGCCCTCCCTGGCTTGCAGCCGCAGAACCCGGCCTGTTCCTGTGTT

GTGTGGCGGTCTGCCTTCCCGTCTCTGTCTCCATACGGCCTTCTGCTCTGTGTGTCTGTGTGTAAATGTTCCTCTTCCCA

TGAGGACACCAGGCATTGGATGAGGGCCCGCCACCTCCAGGATGACCTCATCTTACCTACGTCTGCAAGACCTCATCACT

TTTTTTTTTTTTTTTTTTTTGAGATGGAGTCTCACTCTGTTGCCCAGACTAGAATGCAAAGGCGCAATCTCGGCTCACTG

CAACCTCCGCTTCCTGGGTTCAAGTGATTCCCCTGCCCCAGCCTCCCAAGTAGCTGGAATTACAGGCGGGTGCCACCACA

CTCAGCTAATTTTTGTATTTTTAGTAGACAGAGTTTAACCATGTTGGTCAGGCTGGTCTCGAACTCCTGACCTCAAGTGA

TCTGCCCGCCTTGGCCTCCCAATATGCTGGGATTACAGGTGTCAGCCACCATACCTGGCCAAGACCTCATTTCACATGGG

GTCATGATTACAGCTGCAGGGGTTCAGACGGGGATGTGCCTGTG----------------------GGGGACACAGCTCA

TCTGAAGCAGCATCCACTTGTGGAGGGGGTGGAGCAGGCAACGTGTGGGCTGGGCCGACTGCACCTGCTCGCCGGTTGCG

CAGTTGGGAGCTGTGG----GGTCT---CCAGGTGGCTTCTGCCCGATGTCGTCTGAGAACACAACGAGCTCCTTCCGCC

TCGGGGCCCTCACACTGCCGCGCCCCTGCCTGGACATGCTCTGCCCCTTCCCCGGCTGTTCTCTTCCGTCAGGCCTCAAC

TGACACATCCCCTCTTGAGAGACCCCTTCCTGGCCCCTTGCTCCCCAGACCCCCCAGAGTTCTTTATTGAGGCACA-CAC

TGCTGCCTGGC--------------------------------------------AC-TTCATCGCCACCATGTGCTGTG

CACCTGCG-GTGTGCTGGGCACCACCGTGAGCTCTGGGCGGGCAGCCATGGAGGAGGAAGATGTGGTCATCGTTGACGCC

TGTGGAAGCGGCCCCAGGCTGGGTTGGATAGACCA----------------------------CAGAGTGGCCCGGGTGT

CTGGGGGTGGTCCCCAGCCAGGCAGCCTGTGTCCCTGGAGGCAAGTTCTGGGCGGCAGGGGTTCCTGGAACCCCCTCATG

GCG---ACGG-----------GGCACCGGGAGCCTGAGGAAGGTGGTCGGGAAGTGGGGGCTCCGCGCCAGGCTCTCAGA

CAGCTGCT------GGAAGAAGCCAGCTTTGAGGGTCTCCAGGCTGGGACAAGCCCATCAGTGGCCACCCCTGTGCCCCG

CTGTGTGGGCGGGGCCCCATGACCCCACAGGTTTGCTTTCAGAGCTGCTGCTGCCCCCACTCACTGTTCCTGCCCTGTCC

CACGTGCAGTGGGGGACCCTGACTTGCTGAGGGCGTGGCCTTCACGTCCGAAGCACTCAGACTCCCGGGTAAAGCGAGTC

AGCAGGCCCCGAGCAAGGCTCTTCTGTTGGGGGCTGGGGTGGCCCCGAGCAAGGCCCTCCTGTTGG-------GAGTTGG

G-GCGGCCCCGAG---------TGAGGCCCTCCTGTTGAGAGTTGGGGTAGCCCCTTCTTACCCTTTGCATACATCTCAC

TCCCAGTGGGGGCTCCATGTCTGCACTGAATTGGATGCACTGGGTTTCAGGAGTGTTAAGGAGGGGGTGGAAGACGTGCA

GTGCTGGCAGGTCA----CCTCTCTCTGCAAAACAAGGGCCCTGGTCAATCTCTTGGACGAAGGAGCTGAGGAGGGGGGC

GAGGGGGCGGGTCTGTGCTCAGGGCAGGTGTGCCTGGTG-----------------------------------------

CTTCC-----AG-GCCCTGGAGAAGAAGGGGATCAGCCACCTGGAGGAGAAGGAGCTGAAGGA

>Bos_taurus

ACAACCCCTTTGGTGACAACAACCTGCTGGGCACCTTCATCTGGAACAAG-GT-----GAG-------------------

--------------------------------------------------------------------------------

--------------------------------------------------------------------------------

-----------------------------------------------CCTCGG---------------------------

--------------------------------------------------------------------------------

--------------------------------------------------------------------------------

--------------------------------------------------------------------------------

--------GCAGCC------------------------------------------------------------------

----------------------------------------AGGCTGGGC-------------------------------

----------------------------CCTTAG----------------------------------------------

--------------------------------------------------------------------------------

--------------------------------------------------------------------------------

--------------------------------------------------------------------------------

--------------------------------------------------------------------------------

--------------------------------------------------------------------------------

--------------------------------------------------------------------------------

--------------------------------------------------------------------------------

--------------------------------------------------------------------------------

------------------------------TCCTGCTCATG---------------------------------------

-----------------------------------------------------------------------------TTG

CTTGCCAGTCC---------------------------------------------------------------------

------------------------------TTTCTGTCTTTTTG----------------------CTTCATACA-----

-----------------------------------------------------------------------CTGGTT---

----------------------------ACAG------------------------------------------------

--------------------------------------------------------------------------------

-----------------------------------CTTATTTCCAAAGACATTGTTTAGCATTCCCAG----TGCATGTG

CCCAGGTTGTA--------------------------------------------CCTGCCACTGACATTGTGTGCC-TG

CACGAGCACACACACCAGCTTCCGC-------------------------------------------------------

--CGGCTTCTCCTCTGATGACACTCTCCTATGGTG----------------------------TAAAATTTC--------

----------------------------------------------------------------AGGCCCTCCACCCACA

GAACCAGCCT-----------AACCTCAGGCAGAATGGGAGAACAGGG-----------------------------TCT

CAGCATCACATGCAGGGTGGGATTCCATGGTCAGGGCAG------------------ACAGAGCTC--------------

-------------------------------CATGATGCTGGAGT-----------------------------------

--------------------------------------------------------------------------------

------------------------------GGACTGAGCCGATTCTGCAGGCCGCAGTTCCTTCAG--------------

--GCAGCCGAATCCCTCAGCCTCACACCCCACATCAGCAGAGCAGGTGCTTC----------------------------

-----------------------------------------------------------------GGCCTGGTGGGTCCC

CACCTGGTAGAGCAG---TTATGAAGTGTAGGAG-GCTGTGCTGGATGTTCCCAGGGAGGATGGTGGGAGGAGGCATCTG

TCT----------------CAGCGGGAGTGTGGTTGGCC-----------------------------------------

CTTCC-----AG-GCCCTGGAGAAGAAGGGGATCAGCCACCTGGAGGAGAAGGAGCTAAAGGA

>Trichechus_manatus

ACAACCCGTTCGGTGACAACAATCTCCTGGGCACCTTCATCTGGAACAAG-GT-----GAG-------------------

--------------------------------------------------------------------------------

--------------------------------------------------------------------------------

-----------------------------------CCTGGGCACCCAGCGTGG---------------------------

--------------------------------------------------------------------------------

----------------------------------------------------GCGGGTGGGGCTGGCTAACCTGGCCGCA

GGCACGTACATCCCCTCACTCACTGCACAGCCTCCAGGCCCAGTGTCTGATCCTTTTCTCACCAACCTCGTCCTAGCCCC

GGGCCTTTGCACTTGCCATTCCCTCTGCCCGAAACACTCCCCCACCTCGTTCTGTTGGC---------------------

----------------------------------------TAGTTCCGTCTCAT--------------------------

------------CTTTCACGTCTCCTCTTCAGAG----------------------------------------------

--------------------------------------------------------------------------------

--------------------------------------------------------------------------------

--------------------------------------------------------------------------------

--------------------------------------------------------------------------------

---------AGGCTTTTCTGGCCATCCTCGGTTACTCGGGCACTGGGGTTCTTTGTCAAAGCCCTGCTTCCTGCTCTGAG

CAAATGATTTAACAAACTCGTACTGTGCGCCTGCATCTCCT-------------GCTGCAGGCAGTGGGCGCTGTTAGCA

AGCAGACGGCAGC-------------------------------------------------------------------

--------------------------------------------------------------------------------

------------------------------CCCTGCCCCTG---------------------------------------

-------------------------------------------------------------------------------T

GCGGCCAGCCTTCTCACAAGGGGGC-------------------------------------------------------

------------------------------AGGCTGTCCACTGGTAAAAGAAGCCAGGGAGGAAACAAGGGCACGTGGTG

TGTGAGGTGCCAGGTGCAGCTTAGAACAAACAGGTCTGGGTTGGCCCCACCACAAAGGTC-----------CCGATTCAT

AACCGCGTAAGTGGCATAATTGTCT------AACGTCTGATTTTCCTATCGGACTGTGAGCTCCATGGGCAAGCTCTGTC

CGTGGGGTCTGGCACACAGTAGGCGCTCAATAAATGTGT-----------------------------------------

-----------GTCAGATGAATGAGCTTGCCATGTTCAGGTGTCCCATCAACGAGATGAGCCTTTCTGGTGCTCTCTCAG

CCCTGGTGGGGAGAGCCATTCCTGACCGGGGGAACCCTCCACATGACAAGGGTTTCCATCGGCCCTCAGTGTGTGACAGG

CA--TAGGTGGGGGTCAAGCGCCGT-------------------------------------------------TGTAAC

GGGAAACGCCACAAACGAGTGGCTTTAAAGAACAGACATTTACCATCTAACAGTTTTGGAGGCTGGGATTTT--------

----------------------------------------GAATTGGCATCAGCTTTAGGGGAAGGTCCTTCCTTGTCAT

TCTTCTCTGC-----------TTTCTCATTAACATAACAAAA----------------------AAGTTATTTTCAAGTC

CAGT--CCGACTCATGGTGCTCCCCTGTGTGTGTCAGAGCAGA--------------ACTGTGCTCGATAGGGTTTTCAG

TGGCTGATTTTTTAGAAGGCGATGGCCAGGCCTTTCTTCCAAGGTGCCTTTGGGTAGAGTCGAGCATCCAACGTTTGGT-

--------------------------------------------------------------------------------

---------------------------TAGCAGCTGAGCGTGTTCACCATCTCCACCACCCAGGCA-------CAACTAG

GGGTTGAATTGTA---------TTGGCTCTGGGAGCATTCAGGGAGCAGTGTGTCCTAGTGGGAGTCGGGAGGGTGGAAA

TCGTG------------------------------------------------------------AGCAGGTCACTTCCT

CCCTTGCAGGGCGAATGCTTCGGCCTGGTTGGTGTCATGGGTCAGGGAGTCCAAGTCTCCCTGGCGGAGGGGACTGGGGA

GGGTGGCCTGGTGTGCTGCAGGGACAGGTCAGGAGGAGTCCCGCCCGGTGCACCCAGGGCCCGGGACTCAGCGCTGTGTC

CCCCC-----AG-GCCTTGGAGAAGAAGGGAATTGGCCACCTGGAGGAGAAGGAGCTGAAGGA

**IL30**

>Mus_musculus

TGCCCTGACACAGCAGGCTAAGCAGGCGAAGCACTTCTCAGCCCTTCGAG------------------------------

--------------------------------------------------------------------------------

---------------------------------------------------------------------------AAGTC

ATCAAGGCCCTGCGCCTAGCCATGCAACTGGAAGAACAGGCTAGC

>Mus_spretus

TGCCCTGACACAGCAGGCTAAGCAGGCGAAGCACTTCTCAGCCCTTCGAG------------------------------

--------------------------------------------------------------------------------

---------------------------------------------------------------------------AAGTC

ATCAAGGCCCTGCGCCTAGCCATGCAACTGGAAGAACAGGCTAGC

>Rattus_norvegicus

TGCCCTGACACAGCAGGCTAAGCAGGCTAAGCACTTCTCAGCCCTTCAAG------------------------------

--------------------------------------------------------------------------------

---------------------------------------------------------------------------AAGTC

ATCAAGGCCCTACGCCTGGCCATGCAACTGGAAGAACAGGCTAGC

>Cricetulus_griseus

TGCCCTGACTCAGCAGACTAAGCA---------CTTCTCAGCCCTGCGAG-GT-----GGGTATTG-----TCACTGCAC

AGGTGCA----GCGGTGCCAGCCTGTGGCTCTTAGCAGA--GCAGGCAGTGGCACT------------------------

--------GGAGAAGGTGGTTCCAAA---------GACGCTTGGTGACCCATTTCCACTTCCTT-AC-----AG-AAGTC

ATCAAGGCCCTGCGTGTGGCCATGCAACTGGAAGAACAGGCTAGC

>Microtus_ochrogaster

TGCCCTGGCGCAGCAGACCAAGCA---------CTTCTCTGCCCTGCGAG-GT-----GGGTGTCA-----CCGCCATAC

AGGTGCA----GCAGTGTGGGCCTGTGGCTCCCAGCAG--TACAGGCAATGGCAGT------------------------

--------GGGGAAAGTGCTTCCAAGA----CAGTAACTCT--GTGCCCC----CTCCTTCCTT-CC-----AG-AAGTC

ATCAAGTCCCTGCGCCTGGCCATGCAGCTGGAAGAGCAGGCTAGC

>Nannospalax_galili

TGCTGTGGCACAGGGGGCCAAGCA---------TTTGTCTGCCCTGCGAG-GT-----GGGTGCGG--------------

---TGGATG--GTGGCAGC--CTGTCCACTCCTGGATGG-TGCAAACAGTGGCAGCTTTGCCTT----------------

--GAGTTGGGGGAAGGTGGCTCTGCAAGTCTGAGTAACCCTTTGTGTACCATCTCCCCTTCCTT-AC-----AG-ACGTC

ATCAAGTCCCTGCGCCTGGCCAGGCAGCTGGAAGAGCAGGCCAGC

>Jaculus_jaculus

TGTCCTGACCCAGCAGACCAAACA---------CTTCTCAGCCCTGCAAG-GT-----GGGTGTTG--------CTGTGC

CCGCACAGTGGGTGCCAGCCCCTGCTGGC--------------GAGCCGTGGCAGTTCCCCCACCTTGGTGGTAGGAGCA

AGTGGAGGGAGGAGGGAGGCCATGAGACTGTCAGTAACCCTGTGCATTCCATT------TCCTT-CC-----AG-ATGTC

ATTAAGGCCCTGCGTCTGGCCATGCAGCAAGAAGAGCAGGCTAGC

>Castor_canadensis

TGCTCTGACCCAGCAGACCAAGCA---------CTTCTCAGCCTTAAGAG-GT-----GGGTGTAGCTGAGTGGATTT--

-GGTGGATG--GTGGTGGC--CTGCTGGCTCTTGGACAA-TGCAGGCAATGGCAGCTCTGCCCT----------------

-----AAGTAAGTGGGAGCCTCTGAGACTCTCACTAACCCCTTGTGCCCTACTCCCACTTCCTTCCC-----AG-ATGTC

ATCAAGGCCTTGCGCCTGGCCATGCAGCTGGAAGAGCAGGCAAGC

>Cavia_porcellus

TGCTCTGGCCCAGCAAGCCAAGCA---------CTTCACAGTCCTGCAAG-GT-----GAGTGTGG-------------C

CACGGGGTGACGTGGTGGC--CTGCTGGCTCCTG----------------GGCAGT------------------------

------ATGGGAGTATAGACCCTAGGA--------GATGCCTTGTGTACCGCTGCACTCTCGTT-CC-----AG-AGGTC

ATCAAAGCCTTGCGCCTGGCCATACATCGAGAACAGCAGACAAGC

>Homo_sapiens

TGCTCTGGCCCAGCAAGCCAAGCA---------TTTCTCAGCCCTGCGAG-GT-----GGGTGTGGCTGGATGGG-GTGC

AGGTGGACG--ATGGTGGCCTCTGCTGGCTCTTGGGCAGCTGCAGGTGATGGCAGCTCTGCCCT----------------

-----GAGTGAATGGGGGCTCCTCAGACTCTCACTAACCCCATATGTACCGCTACCCT-TTCTT-CC-----AG-ATGTC

ATCAAGGCCTTGCGCCTGGCCATGCAGCTGGAAGAGCAGGCTAGC

>Bos_taurus

TGCCCTGGCCCAGCAAGCCAAGCA---------CTTCTCAGCCCTGCGAG-GT-----GGGTGCAG--------------

--CTGGAGGGTGGGGCCTC---------------------TGTGGGTGGTGGTGGCTCTGCCT-----------------

------GAGGGAACAGGGTCTCCAAGAGACCTGCTGACTTCAAGTGCACCA---CCCCTGCCTT-CC-----AG-ATGTC

ATCAAGGCCTTGCGCCTGGCCATGCAGCTAGAAGAGCAAGCCAGC

>Trichechus_manatus

TGCCCTGGCCAAGCAAGCCAAGCA---------CTTCTCAGCCCTGCAAG-GT-----GGGTTTGGCTGGATGGGGGTAC

AGTTGGAGG--GTGGTATCGTCTGCTGGCTCCTAGACAACTGCAGGTGTTGGCAGCTCTGCCCT----------------

----GAGTGAATGGGGGGCCTCTGAGACTC-CACTAACCCCATGTGCACCATGACCCCTTCCTT-CC-----AG-ATGTC

ATCAAGGCCTTGCGCCTGGCCATGCAGCTGGAAGAGCAGGCCAGC

**IL31**

>Mus_musculus

CAACCAAACGTGGGAAGATCTGCATATGGGACGTCTCCAAACTCATGAAG------------------------------

---------------------------------------------------------------------GTGCACTTGAA

GTTTGAAATTAATGCCTATGACCCAGCAATCGTGCAACA

>Mus_spretus

CAACCAAACGTGGGAAGATTTGCATATGGGACGTCTCCAAACTCATGAAG------------------------------

---------------------------------------------------------------------GTGCACTTGAA

GTTTGAAATTAATGCCTATGACCCAGCAATAGTGCAGCA

>Rattus_norvegicus

CTACCAAACGTGGGAAGATCTGCATATGGGACGTCTCCAAACTCATGAAG------------------------------

---------------------------------------------------------------------GTGCACTTGAA

GTTTGAGATTAATGCCTACGACCCAGTAATTGTGCAACA

>Cricetulus_griseus

CCACCAAACGTGGGAAGATATGCATATGGGACGTCTCCAAACTCATGAAG------------------------------

---------------------------------------------------------------------GTGCACTTGAA

GTTTGAAATTAATGCCTACGATCCAGCAATTGTACAACA

>Microtus_ochrogaster

CCACCAAACGTGGGAAGATCTGCATATGGGATGTCTCCAAACTCATGAAG------------------------------

---------------------------------------------------------------------GTGCACTTGAA

GTTTGAAATTAATGCCTACGATCCAGCAATTGTACAACA

>Nannospalax_galili

CAACTAAACGAGGAAAGATCTGCATATGGGATGTTTCCAAACTCATGAAG-GT-----TTGCTTTAATTTTGAAGTTAAC

ACATTAATTAATTGGGGAAAAA--AATCAGTTTTAAAC-AAGATTTTTC----ATTTG--T-----AG-GTGCACTTAAA

GTTTGAAATTAATGCCTATGATCCAGCAATTGTACAACA

>Jaculus_jaculus

CAACTAAACGAGGAAAGATCTGCATATGGGATGTTTCCAAACTTATGAAG-GT-----GTGTTTTATTTTCAAAGT-AAC

ACATTAGT-AATTGAAAAGTAA---AAAAGTTGTAAAC--AGGC-TTTC----ATTTA--C-----AG-GTGCACTTAAA

ATTTGAAATCAATGCCTATGACCCAGCCATTGTGCAGCG

>Castor_canadensis

CAACTAAACGAGGAAAGATCTGCATATGGGATGTTTCCAAACTCATGAAG-GT-----ATGTTGTAATTTTGAAGG-AAT

GCATTTGT-AATTGAAAAAAAAAACATCAGTTGTAAACTTAGGATTTTC----ATTTGTTT-----AG-GTGCACTTAAA

GTTTGAAATTAATGCCTATGATCCAGCAATTGTACAACA

>Cavia_porcellus

CAACTAAACGAGGAAAGATCTGCATATGGGATGTTTCCAAACTTATGAAG-GT-----ATGTTTTAATTTTGAAGG-AAC

CGAGTAGT-AACTGATAAAGAG----TGAGTTATAAACTTAGAATTTTT---TATTTGTTT-----AG-GTGCACTTAAA

GTTTGAAATTAATGCCTATGATCCAGCAATTGTACAACA

>Homo_sapiens

CAACTAAACGAGGAAAGATCTGCATATGGGATGTTTCCAAACTTATGAAG-GT-----ATGTTTGAATTTTGAAGT-AAC

AAATTAGT-AATTGAAAAA-AG---ATCAGTTGTAAACTTAGGCTTTTC----ATTTGTTT-----AG-GTGCACTTAAA

GTTTGAAATTAATGCCTATGATCCAGCAATTGTACAACA

>Bos_taurus

CAACAAAACGAGGAAAGATCTGTATATGGGATGTTTCCAAACTTATGAAG-GT-----ATGTTTTAATTTTGAAGG-AAC

AAATCAGT-AACTGAAAAAAAA---ATCAGTTGTAAATTTAGGCTTTTCATTTATTTGTTT-----AG-GTGCACTTAAA

GTTTGAAATTAATGCGTATGATCCAGCAATTGTACAACA

>Loxodonta_africana

CAACTAAAAGAGGAAAGATCTGCATATGGGACGTTTCCAAACTTATGAAG-GT-----ATATATTAATTTTGAAGG-AAC

AGATTAGT-TATTGGAAAAACA-AAATTAGTTGTAAACTTAGACTTTTC----GTTTGTTT-----AG-GTGCACTTAAA

GTTTGAAATTAATGCATATGATCCAGTAATTGTGCAACA

**IL32**

>Mus_musculus

GGATCAACATCATCGTGGCCACGCCCGGCCGGCTCCTGGACCACATGCAG------------------------------

--------------------------------------------------------------------------------

--AACACGCCAGGGTTTATGTACAAGAACCTGCAGTGTCTGGTTATTGATGA

>Mus_spretus

GGATCAACATCATCGTGGCCACGCCCGGCCGGCTCCTGGACCACATGCAG------------------------------

--------------------------------------------------------------------------------

--AACACGCCAGGGTTTATGTACAAGAACCTGCAGTGTCTGGTTATTGATGA

>Rattus_norvegicus

GGATCAACATCGTCGTGGCCACCCCAGGCCGGCTCCTAGACCACATGCAG------------------------------

--------------------------------------------------------------------------------

--AACACACCAGGGTTTATGTACAAGAACCTGCAGTGTCTGGTTATCGATGA

>Cricetulus_griseus

GCATCAACATCATCGTGGCCACCCCAGGCCGGCTCCTGGACCACATGCAG------------------------------

--------------------------------------------------------------------------------

--AATACTCCAGGGTTCATGTACAAGAACCTCCAGTGTCTGGTTATTGATGA

>Microtus_ochrogaster

GCATCAACATTGTCGTGGCCACCCCTGGCCGGCTTCTAGACCACATGCAG------------------------------

--------------------------------------------------------------------------------

--AATACTCCAGGGTTCATGTACAAGAACCTTCAGTGTCTCGTTATTGATGA

>Nannospalax_galili

GAATCAACATCATCGTGGCCACCCCAGGCCGGCTCCTGGACCACATGCAG-GT-----AGAA---GAC-ATTACTTAGCA

CCTGTGTTCATTGTCT---CCTATGAATCATAAGCCTTAACTAGTGACAGTTTTTCTTT--TCTTTGTCC-ATT-----A

G-AATACCCCAGGGTTTATGTATAAAAACCTCCAGTGTCTGGTTATCGATGA

>Jaculus_jaculus

GCATCAACATCATCGTGGCCACGCCAGGCCGGCTCCTGGACCACATGCAG-GT-----AGGA---TGCCATAACACAGTG

CCTCT-CTCATTGTCT---GGCATGAA--ATGA----TAACAACTAACAATGTTTCTTT-TCCTTTGTTCAACC-----A

G-AACACCCCAGGGTTTATGTATAAAAACCTACAGTGCTTGGTTATTGATGA

>Castor_canadensis

GGATCAACATTATTGTGGCTACTCCAGGCCGTCTCCTGGACCATATGCAG-GT-----AGAA---CCCTGTTAGGAACTG

CCTCT-CTTATTGTCT---TGTGTGAAACATAAA-CTTAACAATTGACAGTTTTCTTTC--CCTTTGTTTTATT-----A

G-AACACTCCGGGGTTTATGTATAAAAACCTGCAGTGTCTCGTCATTGATGA

>Cavia_porcellus

GGATCAACATCATCGTGGCCACACCAGGCCGCCTGCTGGACCATATGCAG-GT-----AGGC---CGCTGGTACACAGTG

CTT---CTTGGCAGCT---TGTATGAATCGTAAA-CCTGACAACTGACAATTTTTCTTT-CTATTTGTTTTGTT-----A

G-AATACCCCAGGGTTTATGTATAAAAACCTACAGTGTCTTGTTATTGATGA

>Homo_sapiens

GGATCAACATCATTGTGGCCACACCAGGCCGTCTGCTGGACCATATGCAG-GT-----AAGA---------GATGTAGTG

CTTGT-CTCATTGTCT---TGTATGAAACATAAA-C-TGACAACTAATGGTTGTTCTTTGTCCTTTGTTTTGTT-----A

G-AATACCCCAGGATTTATGTATAAAAACCTGCAGTGTCTGGTTATTGATGA

>Bos_taurus

GGATCAACATCGTCGTGGCCACACCAGGCCGTCTCCTGGACCACATGCAG-GT-----AAGAGGACACTGTCGTGAAGC-

------CCCATCTTCTGTCTGTGTGAAACGTACA-CTTCGCAGCTAACAGTCTTTTTCTGTCCTTTGTCTTGTC-----A

G-AATACCCCAGGGTTTATGTATAAAAACCTACAGTGTCTGGTTATTGATGA

>Loxodonta_africana

GGATCAACATCATCGTGGCCACACCAGGCCGCCTCCTGGACCACATGCAG-GT-----ACAAAAACACCATTAGGT-GCG

CCGGT-CTCATCTTCT------GTGAA-CATCAA-TTTAACAACTGACGGTTTTTCGCTCTCCTTTATCTCCTT-----A

G-AATACCCCAGGGTTTATGTATAAAAACCTGCAGTGTCTGGTTATTGATGA

**IL33**

>Mus_musculus

CACCAGCTTAATAAGAGCTGGAGAGACGAGAAGAAAGAAAACTACCACAA------------------------------

--------------------------------------------------------------------------------

-----------------------ACACGCTTGCCGAGAGTATCGAATACACAAGGAACTGGACCACCCCAGAA

>Mus_spretus

CACCAGCTTAATAAGAGCTGGAGAGACGAGAAGAAAGAAAACTACCACAA------------------------------

--------------------------------------------------------------------------------

-----------------------ACACGCTTGCCGAGAGTATCGAATACACAAGGAACTGGACCACCCCAGAA

>Rattus_norvegicus1

CACCAGCTTAATAAAAGCTGGAGAGATGAGAAAAAAGAAAACTACCATAA------------------------------

--------------------------------------------------------------------------------

-----------------------ACACGCTTGCAGAGAGTATCGAATACACAAAGAGCTGGACCACCCCAGAA

>Rattus_norvegicus2

CACCAGCTTAATAAAAGCTGGAGAGATGAGAAAAAAGAAAACTACCATAA------------------------------

--------------------------------------------------------------------------------

-----------------------ACACGCTTGCAGAGAGTATCGAATACACAAAGAGCTGGACCACCCCAGAA

>Cricetulus_griseus

CACCAGCTTAATAAAAGCTGGAGAGACGAAAAAAAAGAAAACTACCACAA------------------------------

--------------------------------------------------------------------------------

-----------------------ACATGCCTGCAGAGAGTATCGAATACACAAGGAACTGGATCACCCCAGAA

>Microtus_ochrogaster

CACCAGCTTAATAAAAGCTGGAGAGATGAAAAAAAAGAAAACTACCACAA------------------------------

--------------------------------------------------------------------------------

-----------------------ACATGCCTGCAGAGAGTATCGAATACACAAGGAATTGGATCACCCCAGAA

>Nannospalax_galili

CATCAGCTTAATAAAAGCTGGAGAGATGAGAAAAAAGAAAACTACCACAA-GT-----AAGAATCCATATTTTACAGCCA

TTATAGACT--GAATTTTTCATAGATTTGAATTTCATAGATTGGATTTGGTTACAGAGAATTAATACATTCTT-------

--------TTCCCAT-----AG-ACATGCCTGCAGAGAGTATAGAATACACAAAGAATTGGATCACCCCAGAA

>Jaculus_jaculus

CACCAGCTTAATAAAAGTTGGAGAGACGAGAAGAAAGAAAATTACCACAA-GT-----AAGTACAAGTAATTTATGGCTG

TTATAAACT--GAACATTTTTACATTTTTAGT----------------GGTCATGAAGAATGAATACACTCTT-------

--------TCCTTGT-----AG-ACATGCCTGCAGAGAGTACAGAATACACAAAGAACTGGATCACCCCAGAA

>Castor_canadensis

CATCAGCTTAATAAAAGCTGGAGAGATGAGAAAAAAGAAAACTACCACAA-GT-----AAATGTTAATACTCTATGGGTT

TTAAAAATT--GAA---------TTTTTAAGT----------------GGTCACAGAGAATTAATATACTTTC-------

--------TTCCTAC-----AG-GCATGCCTGCAGAGAGTATAGAATACACAAAGAACTGGATCACCCCAGAA

>Cavia_porcellus

CATCAGCTTAATAAAAGCTGGAGAGATGAGAAAAAAGAAAACTACCACAA-GT-----AAATATT-GTACTTTATGGTTT

TTGTAAATA--TAA---------TTTTTTAAT----------------CATCTTGGAAAATTAATATACTCTC-------

--------TTCCCAT-----AG-ACATGCCTGCAGAGAATATAGAATACACAAAGAACTGGATCACCCTAGAA

>Homo_sapiens

CATCAGCTTAATAAAAGCTGGAGAGATGAGAAGAAAGAAAACTACCACAA-GT-----AAATACTAATACTTTATGGTTT

TTTAAAATT--GAATAT------TTTTTGAAT----------------GATCATGGAGAATTAATACACTGTC-------

--------TTCTCAT-----AG-ACATGCCTGCAGAGAGTATAGAATACACAAAGAACTGGATCACCCCAGAA

>Bos_taurus

CACCAGCTTAATAAAAGCTGGAGGGATGAGAAGAAGGAAAACTACCACAA-GT-----AAATATTAATTCTTT--GATTT

TTATCAATTTTGAAAAT------ACATTTAAT----------------GGCCATGGAGAATTAATACACTCTC-------

-------CTTCTCGT-----AG-ACATGCCTGCAGAGAGTATAGAATACACAAAGAACTGGATCACCCCAGAA

>Loxodonta_africana

CATCAGCTTAATAAAAGCTGGAGAGACGAGAAGAAAGAAAACTACTACAA-GT-----AAATATTAATGCATTATTGTTC

TTATAAATT--GAAAA-----AAATTTATAAT----------------GGCCATGGAGAATTAACGTACTCTCTTCCCTT

TTTTTTTCTTCCCTT-----AG-ACATGCCTGCAGAGAGTATAGAATACACAAAGAACTGGACCATCCCAGAA

**IL34**

>Mus_musculus

AAGCAGACATCGACCTCACCAAGAGGGCTGGAGAACTCACGGAGGATGAG------------------------------

--------------------------------------------------------------------------------

----GTGGAGCGAGTGATCACCATCATGCAGAACCCACGACAGTACAAGATCCC

>Mus_spretus

AAGCAGACATCGACCTCACCAAGAGGGCTGGAGAACTCACGGAGGATGAG------------------------------

--------------------------------------------------------------------------------

----GTGGAGCGAGTGATCACCATCATGCAGAACCCNNNNNNNNNNNNNNNNNN

>Rattus_norvegicus

AAGCAGACATTGACCTCACCAAGAGGGCTGGGGAGCTCACGGAGGACGAG------------------------------

--------------------------------------------------------------------------------

----GTGGAGCGTGTGATCACCATCATGCAGAACCCACGACAATACAAGATCCC

>Cricetulus_griseus

AAGCGGACATTGACCTCACCAAGAGGGCTGGAGAGCTCACGGAGGACGAG------------------------------

--------------------------------------------------------------------------------

----GTGGAGCGCGTCATCACCATCATGCAGAACCCACGACAGTACAAGATCCC

>Microtus_ochrogaster

AAGCAGACATTGACCTCACCAAGAGGGCTGGAGAGCTCACGGAGGATGAG------------------------------

--------------------------------------------------------------------------------

----GTGGAGCGTGTGATCACCATCATGCAGAATCCCCGGCAGTACAAGATCCC

>Nannospalax_galili

AAGCAGACATTGACCTCACCAAGAGGGCTGGAGAGCTCACCGAGGATGAG-GT-----GAGGGCA--------GGAAG-G

GGTCTGCAGGT------GGACCTGCCC--TGGAA-------ATGGCCATCTAGCTCTGA-CCTTGTCCTGCCTGCC----

-AG-GTGGAACGTGTGATCACCATCATGCAGAATCCTCGACAGTACAAGATCCC

>Jaculus_jaculus

AAGCAGACATTGACCTCACCAAGAGGGCTGGAGAACTCACTGAAGATGAG-GT-----GAGGATGA-------GAATGAG

GGGCTGCTT--------GGGCCTGTCT--CAGAA-------AAGACCATGTGGACCTGA-CCTTGTCTTGCCTGCC----

-AG-GTGGAACGTGTGATCACCATTATGCAGAATCCACGCCAATACAAGATCCC

>Castor_canadensis

AAGCAGACATTGACCTCACCAAGAGGGCTGGAGAACTCACCGAGGATGAG-GT-----GAGGACCA-------GGAAG-G

GGGTT------------GAGCCCACTTAACAGAAGG-----AGGACCTTGTAGATCTCA-CCTTGTCCTTCCTGTT----

-AG-GTGGAACGTGTGATCACCATTATGCAGAATCCACGCCAGTACAAGATCCC

>Cavia_porcellus

AAGCAGACATCGACCTCACCAAGAGGGCTGGAGAGCTCACCGAGGATGAG-GT-----GAGGACAACAGGGGCTGAGGCG

AGGCCAGGACTG-----GGCCCCATCT--TGGAA-------GGGGCCACCTGGGCCTGA-CCCCCTCCTGCTTC------

-AG-GTAGAGCGAGTGATCACGATCATGCAGAACCCGCGCCAGTATAAGATCCC

>Homo_sapiens

AAGCAGACATTGACCTCACCAAGAGGGCGGGAGAACTCACTGAGGATGAG-GT-----GAGGACAA-------GGAAG-G

GGGCTGGGGGTG-----GGGTCAGCCT--CAGAAAG-----GGGTCCATCTAGATCTGA-CCTTGGTCTGCCTGCC----

-AG-GTGGAACGTGTGATCACCATTATGCAGAATCCACGCCAGTACAAGATCCC

>Bos_taurus

AAGCAGACATCGACCTCACCAAGAGGGCCGGGGAGCTCACCGAGGATGAG-GT-----GAGGACAG-------GGATC-G

GGGCTGGGGCTGGGCCTGGGCCTGCCT--GGAGATG-----GGGGCTGTCTGGACCTGACCCTTGTCCTGCCTGCC----

-AG-GTGGAACGTGTGATCACCATTATGCAGAATCCACGCCAATACAAGATCCC

>Trichechus_manatus

AAGCAGACATAGACCTCACCAAGAGGGCAGGAGAACTCACTGAGGATGAG-GT-----GAGGAAG--------GGAAG-G

GGGCTGTGGGTT-----GGGCCTACTT--GGGAGGGTATCTGGGTCCCCTCTGATCTGAACCTTGTCCCACCTGCC----

-AG-GTGGAGCGTGTGATCACCATTATGCAGAATCCACGCCAGTACAAGATTCC

**IL35**

>Mus_musculus

TGGACCAGTTCTACATGAAAGATGGTGTTACTGCAAAGGATGTCACTCGT------------------------------

--------------------------------------------------------------------------------

--------------------------------------------------------------------------------

--------------------------------------------------------------------------------

--------------------------------------------------------------------------------

--------GAGAGTGGAATTCGTGACCTGATACCAGGTTCTGTCATTGATGCCACACT

>Rattus_norvegicus

TGGACCAGTTCTACATGAAAGATGGTGTTACTGCAAAGGATGTCACTCGT------------------------------

--------------------------------------------------------------------------------

--------------------------------------------------------------------------------

--------------------------------------------------------------------------------

--------------------------------------------------------------------------------

--------GAGAGTGGAATTCGTGACCTGATACCAGGTTCTGTCATTGATGCCACACT

>Cricetulus_griseus

TGGACCAGTTCTACATGAAAGATGGTGTTACTGCAAAGGATGTCACTCGT------------------------------

--------------------------------------------------------------------------------

--------------------------------------------------------------------------------

--------------------------------------------------------------------------------

--------------------------------------------------------------------------------

--------GAGAGTGGAATTCGTGACCTGATACCAGGTTCTGTCATTGATGCCACATT

>Microtus_ochrogaster

TGGACCAGTTCTACATGAAAGATGGTGTTACTGCAAAGGATGTCACTCGT------------------------------

--------------------------------------------------------------------------------

--------------------------------------------------------------------------------

--------------------------------------------------------------------------------

--------------------------------------------------------------------------------

--------GAGAGTGGAATTCGTGACCTGATACCAGGTTCTGTCATTGATGCCACACT

>Nannospalax_galili

TGGACCAGTTCTACATGAAAGATGGTGTTACTGCAAAGGATGTCACTCGT-GT-----AAGCATTTTCAAGAAAAA----

-------------ATTTTGCTGGA--------------------------TCTTACTATGTAAA-AACTATCTTT----T

CTGTTTAGC-----------------------------------------------------------------------

--------------------------------------------------------------------------------

-------------------------TCAGTTCAGTTTTCAAA-----TTTGGATCTAATTTGGT-------CTTTTTCTC

-----AG-GAGAGTGGAATTCGTGACCTGATACCAGGTTCTGTCATTGATGCCACACT

>Jaculus_jaculus

TGGACCAGTTCTACATGAAAGACGGTGTTACTGCAAAGGATGTCACTCGT-GT-----AAGCATTTTCAAGAAAAATAAG

TAAAAACTATGTTTTGGTGCTGGAGAGATGGCTCAGTGGTTCAGGCACTAGCCTTCAGCCTAAC-AACCAGAGTTCGATT

CTCCAGAATCTACATAGTCAGATGCACAAAGTGGCACACGGACCTGGAGGAACTACATCTTCACTTCC------------

------------------------------------------------TCATTC--------------------------

-------------------------TTGCTTTATTTTTCGAA-----TGTGAGTCTAATTCAGTCTCTGATCTTTTCCAC

-----AG-GAGAGTGGAATTCGTGACCTGATACCAGGTTCTGTCATTGATGCCACACT

>Castor_canadensis

TGGACCAGTTCTACATGAAAGATGGTGTTACTGCAAAGGATGTCACTCGT-GT-----AAGAATTTTCAAGAAAAAA---

-------------TTGTTGCTAGA--------------------------ATCTACTGCATTAG-GACTACATTT-----

--------------------------------------------------------------------------------

----------------------------------------AAAAAAAATCTTTC--------------------------

-------------------------TCAGTTTATTTTTCAAA-----TGTGTGTTTAATTTTGTCTTTCATCTTTTCCCC

-----AG-GAGAGTGGAATTCGTGACCTGATACCAGGTTCTGTCATTGATGCCACACT

>Cavia_porcellus

TGGACCAGTTCTACATGAAAGATGGTGTTACTGCAAAGGATGTCACTCGT-GT-----AGGTGGTTTCAGTAAAACATCA

-------------GTGTTTCTAGAT-------------------------CCCTTCTGCATCAG-TGCTATGTTT----T

TTT-----------------------------------------------------------------------------

------------------------------------------------TTATTTCAC-----------------------

-------------------------TCTGTTTATTTTTTAGA-----------TTTATTTCATTCTTCT--CTTT-CTGC

-----AG-GAGAGTGGAATTCGTGACCTGATACCAGGTTCTGTCATTGATGCCACACT

>Homo_sapiens

TGGACCAGTTCTACATGAAAGATGGTGTTACTGCAAAGGATGTCACTCGT-GT-----AAGCATTTTTAGTAATA----A

-------------TTGTTGCTGGA--------------------------CTCTTCTGCGTGGG-GACTAAATTT----T

ATTTTTCATTCTGTAACTTTTAAGTTCAGGGTAACAAGTGCTAGTTTGTTACATAGGTAAACTTGTGTCATGGGGGTTTG

TCGTACACAGTATTTCGTCACCCAGGTGTTAAGCCTAGTACCCATTAGTTATTTTTCCTGGTCCTCTCCCTTCTCCCACC

CTGGGACTAAATTTTGGACTCAATTGAAGTTTATTTGTCAAA-----CCCTTGTTAAACTCGGTCTTTT--TCCCCCCCC

-----AG-GAGAGTGGAATTCGTGACCTGATACCAGGTTCTGTCATTGATGCCACAAT

>Bos_taurus

TGGACCAGTTCTACATGAAAGATGGTGTTACTGCAAAGGATGTCACTCGT-GT-----AAGCATTTTCAATAATA-----

----------------ATTCTGTA-----------------------------TCCTGCTTGGC-AGCTAAATAT----T

TTGGC---------------------------------------------------------------------------

------------------------------------------------TCATTC--------------------------

-------------------------TCTATTTCTTTTCCAGA-----TTTGCTTTTAAATCAGTCTTTGGCTTTTTTCCC

-----AG-GAGAGTGGAATTCGTGACCTGATACCAGGTTCTGTCATTGATGCCACAAT

>Loxodonta_africana

TGGACCAGTTCTACATGAAAGATGGTGTTACTGCAAAGGATGTCACTCGT-GT-----ATGTATTTTAAAAAAAA-----

---------------ATTGTTGGA--------------------------TTCTTCTGTGTGGGCAACTAAAATT----T

TTGTCTGGGTAAC-------------------------------------------------------------------

------------------------------------------------TTGTTA--------------------------

-------------------------CCAATTTATTTTCCAAAGTTTTTTTGTTTTTAATTCAGTCTTTTGCCTTTTTTCT

-----AG-GAGAGTGGAATTCGTGACCTGATACCAGGTTCTGTCATTGATGCCACACT

**IL36**

>Mus_musculus

TGCTGCAGCTGAGTGGGGTCTGCCTATACTTTGAGGAGCTGCCCTCCCAG------------------------------

--------------------------------------------------------------------------------

--------------------------------------------------------------------------------

--------------------------------------------------------------------------------

--------------------------------------------------------------------------------

-------------------GCAGACCCACCACAGCCACCTCTGCAAATCGGCAGCTGCACGGGGTACGT

>Mus_spretus

TGCTGCAGCTGAGTGGGGTCTGCCTATACTTTGAGGAGCTGCCCTCCCAG------------------------------

--------------------------------------------------------------------------------

--------------------------------------------------------------------------------

--------------------------------------------------------------------------------

--------------------------------------------------------------------------------

-------------------GCAGACCCACCACAGCCACCTCTGCAGATCGGCAGCTGCACGGGGTACGT

>Rattus_norvegicus

TGCTGCAGCTGACTGGGGTCTGCCTGTACTTTGAAGAGCTGCCCTCCCAG------------------------------

--------------------------------------------------------------------------------

--------------------------------------------------------------------------------

--------------------------------------------------------------------------------

--------------------------------------------------------------------------------

-------------------GTGGACCCGCCAAAGCCACCTTTGCAAATCGGCAGCTGCACAGGGTACAT

>Cricetulus_griseus

TCCTACAGCTGTCAGGGGTTCGCCTGCACTTTGAGGAGCTGCCCTCCCAG------------------------------

--------------------------------------------------------------------------------

--------------------------------------------------------------------------------

--------------------------------------------------------------------------------

--------------------------------------------------------------------------------

-------------------GTGGACCCGCCAAAGCCCCCTTTGCAGATTGGTAGCTGCACAGGGTACAT

>Microtus_ochrogaster

TCCTGCAGCTGACAGGGGTCCGCCTGCACTTTGAGGAGCTGCCCTCCCAG------------------------------

--------------------------------------------------------------------------------

--------------------------------------------------------------------------------

--------------------------------------------------------------------------------

--------------------------------------------------------------------------------

-------------------CTGGACCCGCCAAAGCCCCCTTTGCAGATTGGTAGCTGCACAGGGTACAT

>Nannospalax_galili

TCCTGCAGCTAACAGGGGTCCGCCTGCACTTCGAGGAGCTACCCCCTCAG-GT-----AGG-------CTGA--CTGATT

AT-------CCCCCGTCCACCA--------------------CATTGAGTGCCTAGG-CCTCCTCTCATCT-CTCAGACC

ATCT----------------------------------------------------------------------------

--------------------------------------------------------------------------------

--------------------------------------------CTGACTCTGTCTTCACAAC---TCCCAA--------

-----CCTCCC-----AG-GTGGACCCCCCAAAGCCCCCCTTGCAGATTGGCAGCTGCTCAGGATACAT

>Jaculus_jaculus

TGCTGCAGCTGGCAGGGGTCCGCCTTCAGTTTGAGGAGCTACCCCCACAG-GT-----AAG-------CTGA--CTGACT

CC------------TGCCACTG-----------------------TGAGCACCTGG--CCCCCTTCCATCC-CTCAGACC

ACCT----------------------------------------------------------------------------

--------------------------------------------------------------------------------

-------------------------------------------GCAGCCTTTCCCTTCTCAACTGATTC-----------

-----CCTCCC-----AG-GTGGACTCGCCAAAGCCCCCCTTGCAGATTGGCAGCTGCTCAGGGTCCAT

>Castor_canadensis

TGCTGCAGCTGGCAGGGGTCCGTCTGCACTTTGAGGAGTTCCCCTCACAG-GT-----GGG-------TTGA--CTGATT

TC--------------CCTCAT--------------------CCTTGAGGCTCCGGACAGCCCTCCCATCC-CTCTGACT

GTCT----------------------------------------------------------------------------

--------------------------------------------------------------------------------

--------------------------------------------CTGACTCTATCTTCTCAAC---TCCCTA--------

-----CCTCTC-----AG-GTAAAACTGCCAGAGCCCCCCTTACAGATTGGCAGCTGCTCAGGGTACAT

>Cavia_porcellus

TGCTGCAGCTGGCAGGGATCTCCCTGCACTTTGAGGAGCTCCCTTCCCAG-GT-----AAG-------CCGA--CTACCG

GC-------CCCTATGCTTCTG--------------------ACTCCCCTACCTGCC-TCCGCCTCCATCC-CTCTGACT

GTCG----------------------------------------------------------------------------

--------------------------------------------------------------------------------

-------------------------------------------------------TTCTCA-------------------

-----TCTTCC-----AG-GCAGAACCACCAAACCTCCCCTTGCAGATTGGCAGCTGCTCGGGGTACAT

>Homo_sapiens

TGCTGCAGCTGGCAGGGGTCCGCCTGCACTACGAGGAGCTCCCGGCACAG-GT-----GAG-------CGGGCTCTGATT

CCCACAGCCCCTGTCTCCTCTC--------------------CCTTGAGCCCATTGA-GCCCCTCCCATCCTTTCTGACC

ATCT----------------------------------------------------------------------------

--------------------------------------------------------------------------------

--------------------------------------------CTGACTCCATTTTCTCAACCTTTCCCTCTTGTATCC

TCCCGTCTCCC-----AG-GAAGAGCCTCCAGAGCCCCCCTTGCAGATCGGCAGCTGCTCAGGGTACAT

>Bos_taurus

TGCTGCAGCTGGCGGGGGTCCGCCTGCACTTCGAGGAGCTCCCCCAGCAG-GT-----GGG-------CCGACTCTGGTC

CTCACGG--TCTCTCTCTCCTTCGAATGCCTGTCCTTGCTGGCCCTGGACCCACCTG-CCCTTCTCCACCCCTTCTGACC

GTGTGCACTCTCCGTCATGGCCGACTCTTTGCCGTCCCTTAGACTGTAGCCAGCCAGGCTCCTCTGTCCATGGAATTTTC

CAGGCAAGAATACTGGAGCAGGTGGCCATTTCCTCCTCCAGGGGATCTTCCCGACCCAGGGATTGAACCCACGTCTCTTG

CGTCTCCTGCATCGGCAGGCGGATTCTTTACCACTACTGCCACCTTGACTGCATCTTTTCGATCCCTCCTCTCCTATATC

TCG--TCTCCC-----AG-GAAGGACCCCCAGAGCCACCTTTGCAGATTGGCAGCTGCTCAGGGTGCCT

>Loxodonta_africana

TGCTGCAACTGACGGGGGTCCGCCTGCACTTTGAAGAGCTGCCCCCACAG-GT-----GGGAGGCTCTCCAACTTGTCTG

CTCATGTAGTCTTTAGCTCCTTCTAATCTCTTTCTCTCTGGCCCTTGACCTCTTGGG---CTCCCCTATCCCTTCTGATC

CCCC----------------------------------------------------------------------------

--------------------------------------------------------------------------------

--------------------------------------------------ATGTCCTCTTG-------------------

-----CCTCCC-----AG-GAAGAGCCCCCAGAGCCCCCTTTGCAGATTGGCAGCTGCTCAGGGTACAT

**IL37**

>Mus_musculus

ATGCGCAAGGCTATCAGGGGCCACCTGGAGAACAACCCAGCTCTGGAGAA------------------------------

--------------------------------------------------------------------------------

-------------------ACTGCTGCCTCACATCCGGGGGAACGTGGGCTTCGTGTTCACCAAGGAGG

>Mus_spretus

NNNNNNNNNNNNNNNNNNNNNNNNNNNNNNNNNNACCCAGCTCTGGAGAA------------------------------

--------------------------------------------------------------------------------

-------------------ACTGCTGCCTCACATCCGGGGGAACGTGGGCTTCGTGTTCACCAAGGAGG

>Rattus_norvegicus

ATGCGCAAGGCCATCCGGGGCCACCTGGAGAACAACCCCGCTCTGGAGAA------------------------------

--------------------------------------------------------------------------------

-------------------GCTGCTGCCTCACATCCGGGGGAACGTGGGCTTTGTGTTCACCAAGGAGG

>Cricetulus_griseus

ATGCGCAAGGCCATCCGGGGGCACCTGGAGAACAACCCAGCTCTGGAGAA------------------------------

--------------------------------------------------------------------------------

-------------------GCTGCTGCCCCACATCCGGGGGAATGTGGGCTTTGTGTTCACCAAGGAGG

>Microtus_ochrogaster

ATGCGGAAGGCCATCCGGGGGCACCTGGAGAACAACCCAGCTCTGGAGAA------------------------------

--------------------------------------------------------------------------------

-------------------ACTGCTGCCTCATATCCGGGGCAATGTGGGCTTTGTGTTCACCAAGGAGG

>Nannospalax_galili

ATGCGCAAAGCCATCCGGGGGCATCTGGAAAACAACCCGGCTCTGGAAAA-GT-----CAGTCTGTGCCCTT--------

--CCCTCCCTTCCTGATGCCC----TCCCTTTTCC---TGCAGGAGAATGG-TGCTTTCAGATAAC-TGTCTCCTGTAAA

CTTCTCTTGGC-----AG-ACTGCTGCCTCATATCCGGGGGAATGTGGGCTTTGTGTTCACCAAGGAGG

>Jaculus_jaculus

ATGCGCAAGGCCATCCGAGGACACCTGGAGAACAACCCAGCTCTGGAGAA-GT-----CAGTCAATGCCTCTGGCAGCCT

-GTGCTTCCTCCCTGGTGCCC-TTCTCCCTTTTCCTCTTGGAGAAAAATGGCTGCTTTCAGATAACTTGTCTACTGTAAA

CTTGTCTTTGC-----AG-ACTGTTGCCTCATATCCGGGGGAATGTGGGCTTTGTGTTCACCAAGGAGG

>Castor_canadensis

ATGCGCAAGGCCATCCGCGGGCACCTGGAGAACAACCCAGCTCTGGAGAA-GT-----CAGTCAGTGCCTCTG-CAGCGC

TGCCCTC----CCTGTCGTCC-GGCTCCCTCTTCC---TGGAGCAGAATGA-TGCTTTTAGGTGAT-GGTGTTCTGTAAA

CTTCTCTTTGC-----AG-GCTGTTGCCTCATATCCGGGGGAATGTGGGCTTTGTGTTCACCAAGGAGG

>Cavia_porcellus

ATGCGCAAGGCCATCCGAGGACATCTGGAGAATAACCCAGCTCTGGAGAA-GT-----TAGTCAGTGCCCCCGACAGTTT

-GTTCTT--TTCCTGCTGCCCTTTCTCCCTTTTCC---TGGAGAAGAATGG-TGCTTTCAGGTGA--TGTGTCTGGTACA

CTTATCTCCGC-----AG-ACTGTTGCCTCATATCCGGGGGAATGTGGGCTTTGTGTTCACCAAGGAGG

>Homo_sapiens

ATGCGCAAGGCCATCCGAGGGCACCTGGAAAACAACCCAGCTCTGGAGAA-GT-----CAGT----TCCCCTGGCAGTTT

TGTCCTTTCTCCCCAGTGCCC-GTCTCCCTCTTCC---TGGAG---AATGG-TGCTGAAAGGTGAT-TGTCTCCCATAAA

CTTCTCTTTGC-----AG-ACTGCTGCCTCATATCCGGGGGAATGTGGGCTTTGTGTTCACCAAGGAGG

>Bos_taurus

ATGCGCAAGGCCATCCGAGGGCATCTGGAAAACAACCCGGCTCTGGAGAA-GT-----CAGT----GTCTTT--------

-ATCCTCTCTTCTCAGTGTCC-TCCTCCCTCTTCT---TGGAGAGGAATGG-TGTTAAAAAGTGAC-CTTCTCCTGTAAA

CTTCTCTTCGC-----AG-ACTGTTGCCTCACATCCGGGGGAATGTGGGCTTCGTGTTCACCAAGGAGG

>Loxodonta_africana

ATGCGCAAGGCCATCCGAGGGCACCTGGAAAACAACCCGGCTCTGGAGAA-GT-----CAGTCAGTCCCCCGAGCTGTGC

CGTCCTC--TTCCCAGTGCCC-TGTTCCATTTTCC---TAGGGAAGAATG--TGCCGAAAGGTGA-------CCCGTAAA

CTTCTCTTTGC-----AG-ACTGTTGCCTCACATCCGGGGGAACGTAGGCTTCGTGTTCACCAAGGAGG

**IL38**

>Mus_musculus

TCAAGTGTGAGCGCTGCAACAAGACACTGACCCCCGGCGGCCATGCTGAG------------------------------

--------------------------------------------------------------------------------

--------------------------------------------------------------------------------

--------------CATGATGGGAAGCCCTTCTGCCACAAGCCCTGCTATGCCACGCTGTTTGG

>Mus_spretus

TCAAGTGTGAGCGCTGCAACAAGACACTGACCCCCGGCGGCCATGCTGAG------------------------------

--------------------------------------------------------------------------------

--------------------------------------------------------------------------------

--------------CATGATGGGAAGCCCTTCTGCCACAAGCCCTGCTATGCCACACTGTTTGG

>Rattus_norvegicus

TCAAGTGTGAGCGCTGCAACAAGACACTGACGCCTGGCGGCCATGCTGAG------------------------------

--------------------------------------------------------------------------------

--------------------------------------------------------------------------------

--------------CATGATGGGAAACCCTTCTGCCACAAGCCCTGTTATGCCACACTGTTTGG

>Cricetulus_griseus

TCAAGTGTGAGCGCTGCAACAAGACGCTGACCCCCGGGGGCCACGCTGAG------------------------------

--------------------------------------------------------------------------------

--------------------------------------------------------------------------------

--------------CATGATGGGAAGCCTTTCTGCCACAAGCCCTGCTATGCCACACTGTTTGG

>Microtus_ochrogaster

TCAAATGCGAGCGCTGCAACAAGACACTGACCCCGGGGGCCCACGCTGAG------------------------------

--------------------------------------------------------------------------------

--------------------------------------------------------------------------------

--------------CATGATGGGAAGCCCTTCTGCCACAAGCCCTGCTATGCCACACTGTTTGG

>Nannospalax_galili

TCAAGTGTGAGCGCTGCAACAAGACGCTGACTCCTGGGGGCCATGCCGAG-GT-----GAG-------------------

---------TGCGTTCTGGGGTAG-------------------------------------------------------A

GGTAGGGA--------------------------------AGACATGGCTTCCCTCC----CTCACCACCACCT---CTC

-TGCCT-----AG-CATGATGGGAAGCCCTTTTGCCACAAGCCCTGCTATGCCACGCTGTTTGG

>Jaculus_jaculus

TCAAGTGTGAGCGCTGTAACAAGACGCTGACACCTGGGGGCCATGCTGAG-GT-----GAG-------------------

---------TG--------------------------------------------------------------TACTTCT

GGAGGGGATTGA----------------------------AGGGGACACACCACAGT-TCATTCACCATCATTC---CTC

TTGTCT-----AG-CATGATGGGAAGCCCTTCTGCCACAAGCCCTGCTATGCCACCCTGTTTGG

>Castor_canadensis

TCAAGTGCGAGCGCTGCAACAAGACGCTGAC-CCCGGGGGCCATGCCGAG-GT-----GAG-------------------

---------TGTGGTCTGGG---------------------------------------------------------CCA

GGGATGGGGG-----------------TGGGGGCTGGGATGGGTGGGGGTCCTTGGCATCACTCAACACCACTT---CTC

-TGCCT-----AG-CACGATGGGAAGCCCTTCTGTCACAAGCCCTGTTATGCCACACTGTTTGG

>Cavia_porcellus

TCAAGTGTGAGCGCTGCTCCAAGACGCTGACACCAGGGGGCCATGCAGAG-GT-----AAG-------------------

---------CAGGGGAGGGGG-----------------------------------------------------ACTGTT

GGTGGGGGGG-------------------AGGAGTAAAAGGGAGCTGGGTCTGCAGC----CTGACTCCTGACTACCCTC

-TATCC-----AG-CACGATGGAAAGCCCTTCTGCCATAAACCCTGCTATGCCACGCTGTTTGG

>Homo_sapiens

TCAAGTGCGAGCGCTGCAGCAAGACGCTGACGCCCGGGGGCCACGCCGAG-GT-----GAGCCCCACTGCGCGG------

---CGCGGGCGGGGGCGGGGGTCG--------------------------------------CGACTCCCGCCACCCTCA

GGCAGGGTC----------------------------------------------------CTGACCCGCGCCC---CTC

-TGCGC-----AG-CATGACGGGAAGCCGTTCTGCCACAAGCCGTGCTACGCCACCCTGTTCGG

>Bos_taurus

TCAGGTGCGAGCACTGCAGCAAGACGCTGACCCCTGGGGGCCATGCCGAG-GT-----AAG-------------------

---------CG------------------------------------------------------------CCTCCCCCA

GGCAGGGAGG-------------------GGGCGGGGAGCCGGGCCAGACCCCCGCC----CTCAACCCCTGCC---CTC

-TGCCT-----AG-CATGATGGAAAGCCCTTCTGCCACAAGCCCTGCTATGCCACGCTGTTTGG

>Trichechus_manatus

TCAAGTGTGAACGTTGCAGCAAGACACTGACGCCGGGGGGCCACGCCGAG-GT-----GAGCCCCCTCCTGGGGGAGGTG

GATCAGGGGTGGGGCCGGGGTCGGGTGGAGTAGAGGCCGAGGCGGAGGGGGGAGCAGCTCTCTGGCTCCCTCCTTCCTCA

GGCAGGGAGGGGTTCCTAAGGAGCCTTTGGGAACAGGCCCAGAGGTGGGGCCCAGGC----CTCACCCCCACACTCCCTC

-TGTCT-----AG-CATGACGGGAAGCCCTTCTGCCACAAGCCCTGCTACGCCACGCTGTTTGG

**IL39**

>Mus_musculus
[truncated: 1,066,242 more chars]
