# Supplementary material for: The multicomparative 2-n-way genome suite
Source: HighWire-hosted journal article supplement (doi:10.1101/gr.262261.120), 2020-07-29
Supplement: SupplementalDataS2.docx [file SupplementalDataS2.docx]

**Alignments for Example 4**

**Ancestral lineage sorting and echolocation**

**Marker Espe2_L**

>L1-4_PVa

-------------------------------------------------------------GAGGATGTGGAGAAAA-GG

GAACCCTCGTGCACTGTTGGTGGGATTGCAAATTGGTGCAGCCACTATGGAAAACAGTTTGGAGGTTCCTCAAAAAATTA

AAAATAGAA---CTACCTTATGACCCAGCAATTCCACTTCTGGGTATTTATCCAAAGAAAACCAAAACACTAATTCGAAA

AGATATATGCACCCCTATGTTCACTGCAGCA-----------CTATTTACAATAGCCAAGATATGGAAGCAACCTAAGTG

CCCATCAATAGACAATTGGATAAAGAAGWTGTGGTACATATATACAAT-GGAAT----ATTACTCAGCCATAAAAA--AA

TGAAATCTT-ACCATTTGCAACAAC-ATGGATGGACCTAGAGGGTATTATGCTAAGTGAAATAAGTCAGACAGAGAAAGA

CAAATACCATATGATTTCACTTATATGTGGAATCTAAAGAACAAAATAAAT----GAAC-AAACAAAATGAAAACAGACT

CATAGATACAGAGAACAAACTGGTGATTGCCAGATGGGAGGGGGGTTGG-------GGGGCTGGGTGAAAAAGGTGAAGG

GATTAAGAAGTACAAA----------------------------------------------------------------

--------------------------------------------------------------------------------

---------------------------------------

>Eonycteris_spelaea

GCTGCCCAGGACTCCTTGGTCAGGAATGAAGTCT--------ACGTTGCTACAATCGA---GAGGACGTGGAGAAAAAGG

GAGCCCTGTGCACTG-CTGGTGAGATCACAGATTGGTGCAGCTACTATGGAAAACAGTGTGGAGGTTCCTCAAAAACTTA

AAAGTAAAA--------CTACGACCCAGCAATTCCGCTTCTGGATATTTAT-CGAAGAAATCCAAAACACTAATTCGAAA

AGATCCATGCACACTTATGTTCATTGCAGTG-----------TTTTTTACAATAGCCATGATGTGGAAGCGACCTAAGTA

CCCATCAATAGAAGATTGGATAAAGAAGAGGTCGCACATATATACTAT-GGAAT----ATTACTCAGCCGTAAAAAAGAA

TGAAATCTT-ACCATTTGTGACAAC-TTGGATGGACCTAGAGGGTATTATGCTAAGTGAAATAAATCAGACA--------

--AATATAATATGATTGGACTTATATGTGGAATCTAAGGAACAAAATGAACAACAAAACAAAACAAAACAGAAATAGACT

C--AGACACAGAGGACAAACTGATGGTTGCCAGATGGGGATGGGGGGAGGGGGTGAGAGGCTAAGTGCAATAAGTGAAAG

GATTCAAAGTCTAAAAAAAA------------------------------------------------------------

------------------------------------TAAAAAGTAG-------AACTGCAA----TTCCACTTAACATAC

GTGCAAC--AATATTTTATCTCT----------GTTTGT

>Pteropus_vampyrus

GCTGCCCGGGACTCCTTGGT-AGGAATGAAGTCT--------ATGTTGCTACAATTGT---GAGGAGGCGGAAAAAAAGA

GAGCCCTGTGCACTG-CTGGTGAGATTGCAGATTGGTGCAGGCACTATGGAAAACAGTGTGGAGGTTCCTCAAAAAATTA

AAAGTAAAA--------CTATGACCCAGCAATTCTGCTTCTGGATATTTATCCAAAGAAATCCAAAACACTAATTCGAAA

AGATCCATCCACACCTATGTTCATTGCAGTGTTTTTTTTTTTTTTTTTATAATAGCCATGATGTGGAAGCAACCTAAGTG

CCCATCAATAGAAGATTGGATAAAGAGGAGGTGGTACATATATACTATGGGAAT----ATTACTCAGCCATAAAAAAGAA

TGAAATCTT-ACCATTTGTGACAACTTTGGATGGACCTAGAGAGTATTATGCTAAGTGAAATAAATCAGACA--------

--AATATAATATGATTGGACTTATATGTGGAATCTGAGAAGCAAAATGAAC----AAAC-AAACAAAACAGAAATAGACT

C--AGACACAGAGGACAACCTGATGGTTGCCAGATGGGAATGGGGGTGGT------GAGGCTAAGTGAAAC--GTGAAAG

GATTAAAAGTTTAAAAAAAAATAAAAAGTANNNNNNNNNNACTGATGGTTGCCAGATGGGATGGGGGTGTGAGGCTAAGT

GTAAAAAGGTGAAAGGATTAAAAGTTTAAAAAAAAATAAAAAGTAG-------AACTGTAA----TTCAACTACACATAT

GTGCAAC--AATATTTTCTCTCTCAGACTCTCAGTTTGT

>Hipposideros_armiger

GCTGCCTGGAACTCTTTGGTCAGGAATAAAGTCT--------ATGTTGCTACGGTTGT---GAGGAGGTAGAGAAAAGGG

AACCCTCATGTGCTGTTTGGTGGGATTGCA-----ATGCAGTCACTATGAAAAACAGCATGAAGATTCCTCAAAAAATGA

AAAGAGAAAAACCTAACTTATGACCCAACAATTCCAC-CCTAGGTATTTATCCAAAGAAACCCAAAACACTAATTAGAAA

AAATATATACACAACTATGTTCATTGCCACA-----------TTATTTACAATAGCCAAGATATGGAAACAACCTAAGTG

CCCATCAATAGACAATTGGATAAAGAAGATGTGAGGAATACATACCAT-GGAAT----ATTACTTAGCCACAAAAAAGAA

TAAAATCTTAACCATTTGCGACAGT-ATGAATGGACCTCGAGGGCATTATACTAAGTGAAATACATCAGACAGAGAAAGA

ACAATACCATGTGAT----CTCATATGTGGAATCTAAAGAACAGAGTGAAC---------GAACAAAACAGAAACAGTGT

CATAGACCCAGAGAACGCACTGATGGTTGCCAGATGGGAGGGGTGATGG-------GAGATTGGGTAAAAAAGGTGAAGG

GATGAAAGGTTTAAAAAAAA------------------------------------------------------------

------------------------------------TTTTTTTTA--------AACTGTAA----TTCAGCTTCACATAT

GTGCAACAGACTATTTTATCTCCAAGCATCTCCGTTTGT

>Rhinolophus_sinicus

GCTGCCTGGAAATCTTTGGTCAGGAATGAAGTCT--------GTGTTGCTACGGTCGT---GAGGAGGTAGAGAAAAGGG

AATCCTTGTGCACTG-TTGGTGGGATTGCAAATTGGTGCAGCCACTACGGAAAATAGCATGAAAATTCCTCAGAACATGT

TTT--AAAAAATGTATCTTATGACCCAACAATTCCATTTCTAGGTATTTATACAAAGAAATCCAAAACACTAATTTGAAA

AAATCTATGCACACCTATGTTCATCGCCACA------------TATTTACAATAGCCAAGATATGGAAACAACCTAAGTG

CCCATCAGTAGACAATTGGATAAAGGAGATGTGTTGCATACATAGAAT-GGAATATTAATTACTTAGCCATAAAAAAAAA

TGAAATCTT-ACCATTTGCAGCAGT-ATGAATGGACCTAGAGAGTATTATGCTAAGTGAAATAAGTCAGACAGAGAAAGA

TAAATACCATGTGATCTCACTTATATGTGGAATCTAAAGAACAGAGTGCGT----GAAC-AAACAAAACAGAAACAGTGT

CATAGATACAGAGAACAGACTGATGGTTGCCAGATGGGAGGGTGGGATGG------GAGACTAGGTAAAA-AGGTGAAGG

GATTAGAGATTTTTTAAAAAA-----------------------------------------------------------

------------------------------------TTAAAAAAAAAAAA---AACT-TAA----TTCAACTCTACATAT

GTGCAACAGAATATTTTATCTCTAAGCATCTCAGTTTGT

>Desmodus_rotundus

GCTGCCTGCAACGCCTTGGTCAGGAATGAGGTCT--------ATGTTGCTATGATTAA----------------------

--------------------------------------------------------------------------------

--------------------------------------------------------------------------------

--------------------------------------------------------------------------------

--------------------------------------------------------------------------------

--------------------------------------------------------------------------------

--------------------------------------------------------------------------------

--------------------------------------------------------------------------------

--------------------------------------------------------------------------------

-----------------------------------------------------AACTGTTA----TTCAGCTCCACATAT

GTACAGCAGAATATCTTACCTCTCAGTATTTCTGTTTGT

>Myotis_brandtii

-------GGGACTCC-------AGAATAAAGTCT--------GTGTTGGTATGATTAA----------------------

--------------------------------------------------------------------------------

--------------------------------------------------------------------------------

--------------------------------------------------------------------------------

--------------------------------------------------------------------------------

--------------------------------------------------------------------------------

--------------------------------------------------------------------------------

--------------------------------------------------------------------------------

--------------------------------------------------------------------------------

-----------------------------------------------------AACTGTCATTCATTCAACTCCACGTAT

GTGCAACAGAACATTTGATCTCTCAGCACCTCAGGCTGT

>Equus_caballus

GCGGCATGGG-CTCCTGGGGCAGGAAGGGAGTCC--------ACGTTGCTGTGATTAC----------------------

--------------------------------------------------------------------------------

--------------------------------------------------------------------------------

--------------------------------------------------------------------------------

--------------------------------------------------------------------------------

--------------------------------------------------------------------------------

--------------------------------------------------------------------------------

--------------------------------------------------------------------------------

--------------------------------------------------------------------------------

-----------------------------------------------------AACTCTAA----TTCAGCTCCACGGAT

GTGCGACAGAACATTTTCTCTCTCTGCGTGTCAGCTTGT

>Bos_taurus

GCT-CGCGGG-CTGCTTATTCAGGAATGTGGGCTCTGCAGTCACCTTGCTGTGATGAA----------------------

--------------------------------------------------------------------------------

--------------------------------------------------------------------------------

--------------------------------------------------------------------------------

--------------------------------------------------------------------------------

--------------------------------------------------------------------------------

--------------------------------------------------------------------------------

--------------------------------------------------------------------------------

--------------------------------------------------------------------------------

-----------------------------------------------------AACTGTAA----TTCAACTCCCCACAT

GTGCCCCAGAATATTTTGTCTC-CAGCGTTTCAGTTTGT

>Canis_familiaris

GCTGTGTGGGAATCCGTGGGCAGGCAGGAGGGCC--------ACGTGGCCCTGATGAA----------------------

--------------------------------------------------------------------------------

--------------------------------------------------------------------------------

--------------------------------------------------------------------------------

--------------------------------------------------------------------------------

--------------------------------------------------------------------------------

--------------------------------------------------------------------------------

--------------------------------------------------------------------------------

--------------------------------------------------------------------------------

-----------------------------------------------------AACTGTAA----TT-------------

---TAACGGGATATTTGAACTCTCAGCACACCAGTTTGG

**Marker Espe4_L**

>L1MA9_3end

--------------------------------------------------------------------------------

-----------AATACTGCATGATCTCACTTATATGTGGAATCTAAAAAAGTCAAACTCATAGAAGCAGAGAGTAGAATG

GTGGTTGCCAGGGGCTGGGGG-GTGGGGGAAATGGGGAGATGTTGGTCAAAGGGTACAAAGTTTCAGTTATGCAGGATGA

ATAAGTTCTGGAGATCTAATGTACAGCATGGTGACTATAGTTAATAATACTGTATTGTATACTTGAAATTTGCTAAGAGA

GTAGATCTTAAGTGTTCTCACCACACACAAAAAAATGGTAAC-TATGTGAGGTGATGGATATGTTAATTAGCTTGATTGT

GGTAATCATTTCACAATGTATACGTATATCAAAACATCACG-TTGTACACCTTAAATATATACAATTTTTATTTGTCAAT

TATACCTCAATAAAGCTGGAAAAA--------------------------------------------------------

--

>Eonycteris_spelaea

GTTATCCCTAGCTCAGTCAGGTTTCACCATGACGTGGTGAT-----------------GAGGTATTT---AAAAAC-AAT

TTTTCAGG---AATACCACGTGCTGTCTCTTATATGTGGAATCTAGAAAA-CCAAACTGGCAAAAACAGAG--TGGAATG

GTGGTTACCAGAGGCAGGGAG-CTGGGGGAATGGGAGAGATGCTGTT--TAAGGTACATACTTGCAGCTTGT-------A

GAAAGTCCTGGAGATCTAATGCACACCACAATGATTATAAACAACAAAATTGTATTCTGCATATTAAACTTTCTGAGAGA

ATAGATCTTA-TTATTTCCACCAC--AAAAAGCTATGATTGCTTATGTGACCAAATAGAG------GCTAATGCTACAAT

GGCAATCATATTGCAA--TATGAATGTATCAAATTGATATG-TTGTATGCCTTAAACTTACACAATATTA---TGTCAAT

TATATCTCAAT----GGGAAAAAA---AAAGAATTATTTGT-CAGG---AAAGTGAC-CTCCTGTAAACAGACTGAGCTA

AT

>Pteropus_vampyrus

GTTATCCCTAACTCAGTCAGGTTTTACCATGACATGGTGAT----------------GGAGGTATTT---AAAAACCAGT

TTTCCAGG---AATACTGTGTGCTGTCCTTCATGTGTGGAATCTAGAAAA-CCAAACTGGCAAAAACGGAGAATGGAATG

GTGATTACCAGGGGCGGGGGG-CTGCGGGGATAGGAGAGATGCTGCT--GAAGGTACATACTTGCAGCTAGT-------A

GAAAGTCCTGGAGGTCTAATGCACACCACAGTGGTTGTAGACAACAAAATTGTATTCTGCATATTAAACTTTCTGAGAGA

ATACATCTTAATTATTTCCACCAC--AAAAAGCTATGATTGCTTATGTGACCAAATAGAGGCATTAGCTAATGCTACAAT

GGCAATCATATTGCAA--TATGAATGTATTGAATTGATATG-TTGTATGCCTTAAACTTACACAATATTA---TGTCAAT

TATATCTCAAT----A-AAAAAAA---AAAGAATTATTTGT-CGGG---AAAGTTAC-CTCCTATAAACAGACTGAGCTA

AT

>Hipposideros_armiger

GTTTTCCCTGGCTCAGTCAGGGTTTACCATACTATGGCGAT----------------GGGAGTATTT---CAAAACCTAT

TTGTCAGG---AATACTGTGTGATGCCTCTTCTATGTGGAATGTCAGAAACTGAACTTGAAAAAAACAGAG--TGGAATG

GTGGTTACCAGGGGCTGGGGG--------AATAGGAGAGATGCTATTT-AAGGGCACATACTTACTACTAGT--AGATAA

ATAAGCCCTGGAGATCTAATACATGGTCCAGTGATTATAGACAACAGAACTGTGTTAGAAACTTTAAACTTACGAAGAGA

ATATATCTTAATTATTCCCACCCC--AAAAAGCAATGATTACTTATGTGACCACATGCAAGTCTTAGCTAATGCTAAAAT

GGCAATCATATTGCAA--TATAAATGTATCATATCTATATG-TTATACCCCTTAAACTTACACAATATTATA-TGTCAAT

TATACCTTCAT----G----AAAA---AAAGAACTATTTGTCCAGG---AAAGTTAC-TTCCTGTATGGAGGTTGAGCTA

AT

>Craseonycteris_thonglongyai

GTTTTCTCTGGCTCAGTCAGGTTTTACCATGATCTGGTGAT----------------AGGGGTATTT---AAAAACCTAT

TTGTCAGG---AATACTGTATGATATCTCTTATATGTGGAGTCTGGAAAACCAAATTGGAAAAAAAAACAGGGTGGAATG

GTGGTTGCCAGGGGCTGGGGGCCTGAGGGAATGGGAGAGATGCTACTT-AAGGTTACAGACTTCAAACTAGT--AGATAA

GTAAGTCCTAGAGATCTAATGCACAGTACAGTGATTATAGATAACAAAACTGTATTATAAACAGGAAACTTGCTAAGAGA

ATAGAACTTACTTATTCCCTCCATA-AAAAAACAATGATGACTTAAGTGATTGAATAGAGGTGGTAGCTAATGCTAAAAT

GACAATTATATTGCAC--TATGAATGTATCAGATCCATAAGTTTGTACACCTTAAACTTACACATGATTGTA-TGTGAAA

TCTACCTCACT----G----GAAA---AAAGACCTCTGTGT-CAGG---AAAGTTGG-TTCCTGTATGGAGGTAGAGCTA

AT

>Desmodus_rotundus

GTTATCCCTGGTTTAGTCAGGGTTTGCCATGATTTGGTGAT--------------GGGTAGGCACTT---AAAAACCTG-

-TGTCAGG------------------------------------------------------------------------

--------------------------------------------------------------------------------

--------------------------------------------------------------------------------

--------------------------------------------------------------------------------

--------------------------------------------------------------------------------

-------------------------------------------------AAAGTTAC-TTCCTCGGTGGAGGATGAGATA

AT

>Miniopterus_natalensis

GTCACCTCTGGCTTAGTCAGGCTTTGCCATGACTGGGTGAT--------------GGGTAGGTGCTT---AAAAACCTAT

TTGTCAGG------------------------------------------------------------------------

--------------------------------------------------------------------------------

--------------------------------------------------------------------------------

--------------------------------------------------------------------------------

--------------------------------------------------------------------------------

-------------------------------------------------AAGGTTGC-TTCCTGCATGGAGGTTGAGCTC

GT

>Equus_caballus

GTTATCCTGGGCTCAGTCCAGGTTTGCCATGATATGGAATTGGCAG----GGCGGGGGGTGGTATTT---AAAAACCTGG

TTGTGAGA------------------------------------------------------------------------

--------------------------------------------------------------------------------

--------------------------------------------------------------------------------

--------------------------------------------------------------------------------

--------------------------------------------------------------------------------

-------------------------------------------------AAAGCTGC-TTCCTGTATGGAGGTTAAGCTA

AT

>Bos_taurus

ACCATCTCTGGTTCAGTCAAGGTTTGCCATAATATGGTCTT------------GGGAAGCGGTATTT-------------

--GTCAAA------------------------------------------------------------------------

--------------------------------------------------------------------------------

--------------------------------------------------------------------------------

--------------------------------------------------------------------------------

--------------------------------------------------------------------------------

-------------------------------------------------AGCTTTAC-TTTTTGTATGGATCCTGAGCTA

AT

>Canis_familiaris

GTTATCTTTGGCTTAGTCAGGGTTTGCCATGATATGGTGGTAGTGGTTGGGGGGGGGGGTGTTATTT---AAAAACCTGT

TTGTCAGG------------------------------------------------------------------------

--------------------------------------------------------------------------------

--------------------------------------------------------------------------------

--------------------------------------------------------------------------------

--------------------------------------------------------------------------------

-------------------------------------------------AAAGTTACTTTCCTGTGTGGAGGCTGAGCTG

AT

**Marker Espe5_L**

>L1-4_PVa

-------------------------------------------------------TATCACCTCACACCTGTCAGAATGG

CTATCATCAATAAATCAAAAAACAACAAGTGTTGGTGAGGATGTGGAGAAAAGGGAACCCTCGTGCACTGTTGGTGGGAT

TGCAAATTGGTGCAGCCACTATGGAAAACAGTTTGGAGGTTCCTCAAAAAATTAAAAATAGAACTACCTTATGACCCAGC

AATTCCACTTCTGGGTATTTATCCAAAGAAAACCAAAACACTAATTCGAAAA-GATATATGCACCCCTATGTTCACTGCA

GCACTATTTACAATAGCCAAGATATGGAAGCAACCTAAGTGCCCATCAATAGACAATTG--GATAAAGAAGWTGTGGTAC

ATATATACAA-TGGAA---TATTACTCAGCCATAAAAA-AATGAAATCTTACCATTTGCAACAACATGGATGGACCTAGA

GGGTATTATGCTAA-GTGAAATAAGTCAGACAGAGAAAGACAAATACCATATGATTTCACTTATATGTGGAATCTAAAG-

-------------------AACA---AAATAAATGAACAAACAAAA--------TGAAAACAGACTCATAGATACAGAGA

ACAAACTGGTGATTGCCAGAT----------GGGAGGGGGGTTGGGGGGCTGGGTGAAAAAGGTGAAGGGATTAAGAAGT

ACAAATTGGT----------------------------------------------------------------------

---------------------------

>Eonycteris_spelaea

GATATTAGAGCCTAGAAGAATCTCAATATTTTTT---AAATTAATGAATTAT---TATCACCTCATACCTGTCTGAATGG

CTATAATCAAAAAGTCAACAAATAATAATTGTTGGCAAGAATGTGGAGAAAAGGGAACCTCTGTGCACTTT--GAGGGAC

-ATAAATTGGTGCAG-CGCTATGAAAAATAGTATGGAGATTCTTCAAAAAATTAAAAATAGAACTACAT-ACGATCTAGT

AATTCTACTTCTGGGTATTTACCTGAAGGAAAAAATCCCACTAATTCAAAAAAGATATATGCACCCTTATGTTTACTGCA

G---TGTTTACAATAGCCAAGGTATAGAAGCAACCT----GTCAACTGGTAAATGAATATAAACAAAGA---TGTGGCAC

ATGTATACAA-TGGAC---TATTA-------ACCATAAGAATGAAATTTTGCTATCTGTAACAACATAGATGGATCTAGA

ATGTATTATGCTAAAGTAAAATAA---AGTCAGGGAATGAAAAATACCGTATGTGTAATCTAAAAAACAAAAACAAAAA-

------------CAAACCCAACCC--AAACAAATGAACAAATAAAACAAAA---CAAAAACAGATTCATAGAAACAGAGG

ATGAACTGATGTTTGTAGGTGTATGTGT---GGGGGGCAGGTTGAGAGG-TAGGTGAAGAAGTTGAAAGG----AAATAA

AGAAAAT------AAATTAATGAACAAT---TGAATCAA-----------------------CACATTTTGAGGATTACA

T--AGGAAAACAGATAGCTAAAGAGGG

>Pteropus_vampyrus

ACC--TAGAACATAGAAGAATCTCAATGTTTTTT---AAATTAATGAGTTAT---TACCACCTCATACCTGTCAGAATGG

CTATAATCAAAAAGTCAACAAATAAGAAGTGTTGGCAAGAATGTGGAGCAAAGGGAACCTCTGTGCCCTTT--GTGGGAC

-ATAAATTGGTGCAGCCACTATGAAAAATAGTATGGAGATTCTTCAAAAAATTAAAAATAGAACTACAT-ATGATCCAGT

AATTCTACTTCTGGGTATTTATCTGAAGGAAAAAATCCCACTAATTCAAAAAAGATATATGCACCCT-ATGTTTATTGCA

G---TGTTTATGATAGCCAAGATATGGAAGCAACCT----GTCAACTGGTAGATGAATA--AATAAAGA---TGTGGCAC

ATGTATACAAATGGAC---TATTACTCAACCACAAAAAGAATGAAATCTTGCTATCTGTAACAACATAGATGGACCTAGA

AAGTATTATGTTAA-GTAAAATAA---AGACAGGGAAAGAAAAATACCATATGTGTAATCTAAAAAAAAAAACCAAAAAA

CAAAAAATCAAAAATCCCCAACCC--AAACAAATGAACAAATAAAAAAAAAAACCAAAAACAGATTCATAGAAACAGAGA

ACAAACTGATGGTTGTGGGGGTGTGTGTATGGGGAGGCAGGTTGAGAGGATAGGTGAGG---TTGAAAGG----AAATAA

AGAAAAT------AAATTAATGAACAAT---TGAATCAACAAAAATACACTAACAAA-----CACATTTTGAGGATGACA

T--AGGAATGCAGATGGCTAAAGAGGG

>Hipposideros_armiger

ACC--TAGAAT-----AGAATCTCAATGATTTTT---AAATTAATGAACTAT---TACTATCTCACACCTGTCAGAACGG

TTATTATAAAAAAGTCAACAAATAACAAATGTTGGTGAGGATGTAGAGAAAACAGAACCTGTGTGCACTGTTGGTGGTAT

-GTAAATTGGTGCAGCCAGTATGGAGAATAGTATGGAGATGCCTCAAAAAATTACAAATAGAGCTACAT-ATGATCTAGC

AATTCCACTTCTGGGTATTTATCTGAAGGAAAAA--CCCACTAATAAGAAAA-GCTATATACACCTCTATGTTCATTGCA

GCATTATTTACTATAGCCAAGATATGAAAGCAACCTAGGTGTCCATTGATAAATGAATG--GATAAAGA---TGTGGTAC

ATATATACAA-TGGACAATTATTACTCAGCCATAAAAA--CCAAAATCTTGTCATTTACAACAACATAGATGGACCTAGA

TGACATTATGCTAA----------GTCAGACAGAGAGAGA--AATATTATATGATTCCACTTATATGTA----CAAAAA-

-------------------AACCCCCAAACAAATGAACAAACAAAACAAAA---CAAAAACAGACTG--AGAAACAGAGA

ACAAACTGATGACTGCCAGA-----------AAGAAGGGGATTCGGGGGATGGATGAGGGGGAAGA-GGAATAAAAAGAA

AAAAACT------AACTTAATGAAGTAT---TGAATCAGCAAAAATACACTAACAAAGACAACAAAATTTAATGATGACA

T--AGGAGTGGGGATAGCTGAAGGGGG

>Megaderma_lyra

ACC--TAGAAC-----AGAATCTCAATGCTTCTT---AAATTAATGAGCTAT---TACCACTCCACAC--GTCAGAATTG

TTACTATCAAAAAGTCAACAAATAA---GTGTTGGCAAGGATATGGAGAAAAACAGAACCCTGTGCCCTGTTGGTGGGAT

-GTAAATTGGTGCAAGCACTATGGAAAATAGTATGGAGATTCCTCAGAAAATTAAAAATAGAACTTTAT-ATGATTCAGC

AATTCCACTTCTGGGTATTTATCTGAAGAAAAAAACCACACCAATCTGAAGA-GATATATGCACCTCTATGTTCATTGTA

GTGTTATTTACAATAGTTAAGAAACAGAAGAAACCTAGCTGTCCATCGATAGATGAACA--GATGAAGA---TGTGGTAC

A-ATATACAA-TGAAA---TACTACTCAGCCACAAAAAGAATGAAATCTTATCAATTGCAACAACACAGGTAGACCTAGA

TGATATTATGTTAA-GTGCAATAAATCAGACAAAGAAA----AATACCATATGATTTCACTTACATGTGTTAAAAAAAA-

--------------------ACCCCAAAACAAATGAACAAAAAAAGAAAAC-----AAAACAGACTC----AAACAGGAA

ACAAACTGATGGCTGCCAAA-----------GAGGAGGGGGAGAGGGGGATGGGTGAAGGGAAAGG-GGTAAAAAGAAAA

AAAAAAT------AAATGAATGAACTAT---TAAACCAGTGAGAATACACTAACAAAGAAAACAAAATTTGAGGATGA--

T--AGGAGTGTGGATAGCTGAAGAGGG

>Desmodus_rotundus

ACC--TAGAACATAGCATAATCTTGATGATTTTT---AAATTAATGAACTGT----------------------------

--------------------------------------------------------------------------------

--------------------------------------------------------------------------------

--------------------------------------------------------------------------------

--------------------------------------------------------------------------------

--------------------------------------------------------------------------------

--------------------------------------------------------------------------------

--------------------------------------------------------------------------------

--------------------------------------------------------------------------------

-------------------------------TGAACCAACAAA-ACACACTAACAAAAAAAAC----TTT--TGATGCCA

T--GGGAATGAGGGTAGGTGAAGAGGG

>Myotis_brandtii

AGCA-TAGGACATAGCAGAGTCTCAATGGTTTTT---AAATGAACGAACTAT----------------------------

--------------------------------------------------------------------------------

--------------------------------------------------------------------------------

--------------------------------------------------------------------------------

--------------------------------------------------------------------------------

--------------------------------------------------------------------------------

--------------------------------------------------------------------------------

--------------------------------------------------------------------------------

--------------------------------------------------------------------------------

-------------------------------TGGACCAA-GAAAATACACTAACAAAGAAAACAAATTTTGAGGATGACA

T--AGGAATGGGGGTAAGTGGAGAGGG

>Equus_caballus

ACC--------ATAGCAGAATCTCAATGTTTTTT---AAATTAGTAAACTGT----------------------------

--------------------------------------------------------------------------------

--------------------------------------------------------------------------------

--------------------------------------------------------------------------------

--------------------------------------------------------------------------------

--------------------------------------------------------------------------------

--------------------------------------------------------------------------------

--------------------------------------------------------------------------------

--------------------------------------------------------------------------------

-------------------------------GGAACTAATGAACAAACACTAACAAAGAAAACAAATTTTGAGAACGACG

C--AGGAATGGGGATAGGTGAAGAGGG

>Bos_taurus

ACC--TAAAACATAGCAAAATCTCAGTGTTTTTA---AAATTAAT----TAT----------------------------

--------------------------------------------------------------------------------

--------------------------------------------------------------------------------

--------------------------------------------------------------------------------

--------------------------------------------------------------------------------

--------------------------------------------------------------------------------

--------------------------------------------------------------------------------

--------------------------------------------------------------------------------

--------------------------------------------------------------------------------

-------------------------------TAAACCAATGAAAATGTGCTAACAAAGAAAGCAAATTTTGAGGATGGCA

C--AGAAATTGGGATAGGTAAAGAGGG

>Felis_catus

ACT--TAGAATATAGCAGAATCTCAATGGTTCTT---AAATTAATAAATTAT----------------------------

--------------------------------------------------------------------------------

--------------------------------------------------------------------------------

--------------------------------------------------------------------------------

--------------------------------------------------------------------------------

--------------------------------------------------------------------------------

--------------------------------------------------------------------------------

--------------------------------------------------------------------------------

--------------------------------------------------------------------------------

-------------------------------TGAACCAATGAAAATATACTAACAAAAAATTT---TTTTGAAGATGATA

TCAAGGAATGGAGATAA--AAAGAGAG

**Marker Espe6_L**

>L1-4_PVa

---------------------------------------------------------------TAGCCAAGATATGGAAG

CAACCTAAGTGCCCATCAATAGACAATTGGATAAAGAAGWTGTGGTACATATATACAA----------TGGAATATTACT

CAGCCATAAAAAA----------ATGAAATCTTACCATTTGCAACAACATGGATGGACCTAGAGGGTATTATGCTAAGTG

AAATAAGTCAGACAGAGAAAGACAAATACCATATGATTTCACTTATATGTGG---AATCTA-------------------

--------------------------------

>Eonycteris_spelaea

GTAGAAGCTGTGGGCACTT----GCTGCATATCTCCTCACTGCTTCCATAC---ACACCG---TAACCAAGATATGGAAG

CAACCTAA-TGTTCATCAGTAGATAATTGGATAAAGAGGGTATAGTGCATATGTACTCGGTAACATACTGGAATATTACT

TGGCCATAAAAAA--------GCATGGAACCTTACTATTTGTGACAACATGGATGGACCTAGAGGACATTATA--AAGTT

AAATAAGTCAGGCAGAGAAAGACAAATACCATATGATTCCACTTATACGTGG---AATCCA---ATGGCTCCTTGTGGCT

GTCTG-CGGAGGGCATTGTCTGACTGCAGCAA

>Pteropus_vampyrus

GTAGAAGCTGTGGGTACTG----GCCCCGTATCTCCTCACTGCTCCCATAC---ACACCA---TAGTCAAGATATAGAAG

CGACCTAAACGTTTAGCAATAGATGACTGGATAAAGAGGATATAGTGCATATATACTCAGTGACATACTGGAATATTACT

TGGCCATAAAAAAAAAAAAAAGCATGGAATCTTACTATTTGTGACAACATGGATGGACCTAGAGGATATTATGTTAAGGT

AAATAAGGCAGACAGAGAAAGACAAATACCATATGATTTCACTTATATGTGG---AATCCA---ATGGCTCGTTGTGGCT

GTCTG-TGGAGGGCATTGCCTGGCTGCAGCAA

>Hipposideros_armiger

GTAGATGCTGTGGGCACTT----GTTCCATGTCTCCTCGCTGCTCCCATAT---GCACCA---TAGCCAAGATGTGGAAG

CAACCTAAATGTCCTTCAATAGGCAACTGGATAAAGAAGAGGTGATACATATATGC----------AGTGGAATATTACT

CAGCATAAAAAA---------GAATGAAACCTGACCATTTACGACAACACGGATGGGCCTAGAGGGTATTATGCGAAGTG

AAATAAGTCAGACAGAGAAAGACAAATCCCATGTGATGTTGCCTATATGTGG---AACCCA---TTTGCTTCTTGTGGCT

GTCTGTCTGAGGGCATTGTCTGGCCACAGCAC

>Rhinolophus_sinicus

GTAGCAGC-------ACTT----GTTCCATATCGCCTTGCTGCTCCCATAT---GCACCA---TAACCAAGATGTGGAAG

CAACCTAAATGTCCTTCAATAGGCAGCTGGATAAAGAAGAGGTGGTATATATAC------------AATGGAATGTTACT

CAGCATAAAAAA---------GAATGCAATCTTACCATTTGCGACAACATGGATGGACCTAGAGGGTATTGTGCCAAGTG

AAGTAAGTCAGGCAGAGAAAGACAAATACCTTATGATCTCACCTGTATGTGG---AATCCA---ACGGC------TGGTT

GTCTG----AGGGCATTATCTGGCTACAGCAA

>Desmodus_rotundus

GTAGGAGCTGCGGACGCTC----ATTCCATGCCTCCTCGCTGCTCCCATAC---GCGCCA--------------------

--------------------------------------------------------------------------------

--------------------------------------------------------------------------------

----------------------------------------------------------------GTGGCTCCTAGTGGCT

GTCTGCCTGTGGGCACTGTCCGGCCACAGCAG

>Murina_aurata_feae

A---GAGCTGTGGGCACTT----GTTCGATATCTCCTTGAAGCTATTAGAT---ATCATC--------------------

--------------------------------------------------------------------------------

--------------------------------------------------------------------------------

----------------------------------------------------------------TCAGCTTCT-GTGGCA

GTCTG----AGGGCACTGTCTGGCCACAACAA

>Equus_caballus

GTGGCAGCTCTGGGCATTT----GTTCTTTAGCTCCTTGCTGCTCCCATAC---ACACCA--------------------

--------------------------------------------------------------------------------

--------------------------------------------------------------------------------

----------------------------------------------------------------ATGGCTTCTCGGGGCT

GTTTATCTGAGGGCATTTTCTGGTCACAAGCA

>Sus_scrofa

GTAGGAGCCGTGGGTACCT----GTCCC-CATCTCCCCAGTGCG----CAC---ACCCCA--------------------

--------------------------------------------------------------------------------

--------------------------------------------------------------------------------

----------------------------------------------------------------GTGCCTTCTTGTGG--

-------GAAGGTCAAGATCTT----CAGGGA

>Canis_familiaris

GTAGGAGCTTTGGGAACTTAGCTGTTCTGAATTCCCTTACTGCTCCCATAT---ATCCTA--------------------

--------------------------------------------------------------------------------

--------------------------------------------------------------------------------

----------------------------------------------------------------ATGTCTTCTTGTGGCA

ATTCATCTGAGGGCACTGTCTG-----GTGCA

**Marker Espe8_L**

>L1-4_PVa

-----------------------------------------------------------CAAAGAAAACCAAAACACTAA

TTCGAAAAGATATATGCACCCCTATGTTCACTGCAGCACTATTTACAATAGCCAAGATATGGAAGCAACCTAAGTGCCCA

TCAATAGACAATTGGATAAAGAAGWT---GTGGTACATATATACAATGGAATATTACTCAGCCAT----AAAAAAATGAA

ATCTTACCATTTGCAACAACATGGATGGACCTAGAGGGTATTATGCTAAGTGAAATAAGTCAGACAGAGAAAGACAAATA

CCATATGATTTCA-------------------------------------------------------

>Eonycteris_spelaea

AAATAAAAAGA-----ATAGATGTTATTTCATAGA-TTTGGGGAGACATTCAATTA---CAAAGAAATCTAAAACACTAA

TTCTGAGAGATCTATGCACCTCTACG-TCATTGCAGTGTTATTTACAATAGCCAAGATATGGAAGCAACTTAAATGCCCT

TTAATAGACGACTGCATAAAGAAGAAGATGTGGTGCGTATATATAATGGAATGTTACTCAGCTATAAAAAAAAGAATAAA

GTCTTTTCATTTGTGGCAACATGAATGGACCTGGAGGATATTATGCTAAGTGAAATAAGTCAGGCAAAGAAAGAGAAATA

CTATATGATCTCA---AAATATAATTATCG-ACTTATCTTTTATGTCAGCATTGTGCTGAGCTCT-GG

>Pteropus_vampyrus

AAATAAAAAGA-----ATAGATGTTATTTCATGGA-TTTGGGGAGACATTCAGTTA---CAAAGAAATCTAAAACACTAA

TTCAGAAAGATCTATGCACCTCTATGTTCATTGCAGTGTTATTTACAATAGCCAAGATGTGGAAGCAACTTAAGTGCCCA

TTAATAGACGATTGCATAAAGAAGAA---GTGGTACATATATATAATGGAATGTTACTCAGCTAT-AACAAAAGAATAAA

GTCTTTTCATTTGTGACAACATGGATGGACCTGGAGGATATTATGCTAAGTGAAATAAGTCAGGCAAAGAAAAAGAAATA

CTGTATGATCTCA---TAATGTAATTATTGAACTTATCTTTTATGTCAGCATTGGGCTGAGCTCT-GG

>Hipposideros_armiger

AAATAAGGAGA-----ATGGATGTTATTTCATGGA-TTTGGGGAGCCATTCAATCA---CGAAGAAATCCAAAACACTAA

TTCAAAAAGATATATACACCCCTGTGTTCACTGCAGCGTTACTTACAATAGGCAAGAGATGGAAGCAACCTAAGAGCCCA

TCAATAGATGACTGGATAAGGAGGA------GGTACAGATATACAATGGAATATTACTCGGCTAT--AAAAAAGAATGAA

CTCTTACCATTTGCAACAACATGGATGGACCTGGAGGATATTAT-CTAAGTGAAATAAGTCAGACAGAGAAAGGCAAATA

CCATATGACCCCA---CAATGTAATTATTGATCCTGTCTTTCATGTCAGCATCATGCTGAGCTCT-TA

>Megaderma_lyra

AAATAATGAAA-----ATGACTGTTGGTTCATGGATTTTGGGGATCCATTCAATTA---TGAAGAAATCCAAACCACCAG

TTCAAAAAGATATACACACCCTTGTGTTCATTGCAGCATTATTTACAGTAGCCAAAATATGGAAGCAACTTAAGTGCCCA

TCAACAGACAATTGGTTAAAGAAGAT---GTGGTA-ATATATACTACGGAATATTAATCGACCAT---AATAAGAATGAA

ATCTTACCACTGGAGACAATATGGATGCACCTGGAGGATATTACGCTAAATGAAATAAGTCAGATAGAGAAAGACAAATA

CCATATTATCTCA---C------ATTATTGAATCTATCTTTCATGTCAGCACTATGCTGAGCTCT-GG

>Desmodus_rotundus

AAATAAGGAGA-----ATGGGTGTTATTTCATGGA-TTTGGGGAGCCATTCAATCA------------------------

--------------------------------------------------------------------------------

--------------------------------------------------------------------------------

--------------------------------------------------------------------------------

----------------CAATATAATTACTGAACCTGTCTTTTGTGTTAGCATGGTGCTGAGCTCT-GG

>Myotis_brandtii

AAAAAGGGATA-----ATGGATGTTATTTCATGGA-TTTTGGGAGCCATTCAATCA------------------------

--------------------------------------------------------------------------------

--------------------------------------------------------------------------------

--------------------------------------------------------------------------------

----------------CAATATAATTATTCAACCTGCCTTTTGTGTCAACATCATGCTGAACTCTTGG

>Equus_caballus

AAATAAGGAGA-----TTGGGTGTTATTTCATAGA-TTTGGGGAGCCATTCAATCA------------------------

--------------------------------------------------------------------------------

--------------------------------------------------------------------------------

--------------------------------------------------------------------------------

----------------TAATATAAT-ATT---------------------------------------

>Bos_taurus

AAATACGGAGA-----TTGGATGTTATTTCATGGA-TTTGTGGAGCCATTCAATCA------------------------

--------------------------------------------------------------------------------

--------------------------------------------------------------------------------

--------------------------------------------------------------------------------

----------------CAGTACAATTACTGAATCTG-CATCTTCTTGGCCACCATACTGGGCTCC-GG

>Canis_familiaris

AAATGAAGAGATTGTTATAGATGTTATTTCATAGA-TTTGGGGAACCATTCCATCA------------------------

--------------------------------------------------------------------------------

--------------------------------------------------------------------------------

--------------------------------------------------------------------------------

----------------AAATGTAATTACTAAGCCTGTGTTTTGTGCCAGCATTGTGCTGGGTTCT-GG

**Marker Espe10_L**

>HAL1-3_PVa

---------------------------------------------------GTC---AATAATATT-GTA-ATAACTATG

TATGGTGTCAGATGGGTACTAGATTTATCGGGGTGATCACTTCGTAAGTTATATAAATGTCTAATCACTATGTTGTACAC

CTGAAACTAATATAATATCGTATGCCAACTG-TAATTGAAAAATAAAAAAATTATTTTAAAAAA----------------

-----------------------------------------------------------------

>Eonycteris_spelaea

AAAA-ATGAGGTAATGAACTCAACTCTCACTTTTCTC---AGACTGTTTATGTC---AACAATGATTGCAGATAATT-TG

TACAGTGACAGATGGTTACTAGATTTCTCATGGTGATCACTTCGTAAGATATATAAATGTCAAATCACTATGTTGTACAG

CTGAAATTA-TGTAATATTGTATGTCAACTA-TACTTTAA----------------CTAAAA-------AGCTTTACATT

---ACAAAAAATA-----------------------ATGATTGCAGAAATTATATAATTATACAT

>Pteropus_vampyrus

AAAA-ATAAGGTAATGACTTCAACTCTCACTTTTCTC---AGACTGTTTATGTC---AACAATGATTGCAGATAACTTTG

TACAGTGACAGATGGTTACTAGATTTCTCATGGTGATCACTTCATAAGATATATAAATGTCAAATCACTATGTTGTACAG

CTGAAAATAATGTAATATTGTATGTCAACTA-TACTTTAA----------------CTAAAA-----AGAGCTTTAC---

-------AAAAAC-----------------------ATGATTGCAGAGATTATATAATTACACAT

>Hipposideros_armiger

AAAA-ATAAGGCAATGGCTTCAACTCTCACCTTTCTC---AGACCATTTATATC---AATAATGACTGCAGATAACTTTG

TACAGTGACAGATGGCTATTAGAC--CTCCTGAAGATCACTTTGTAAGATATATAAATGTCAAACTACAATGTTGTACAC

CTGAAATTAGT---ATATTGTATGTCAACAA-TACTTTAA----------------TTAAAA-----AGAACTTTAGATT

----CCAAAAGAA-----------------------AAAATTGCAGAGATTACATAATTACACAT

>Megaderma_lyra

AAAA-ATAGGGCAATGGCCTCAACTCTCACCTTTCTA---ACACTGTTTATGTC---AATAATGATTGCAGATAACTTTG

TATGGTGACATATGGTTACTAGGCTTCTCGTGGTGATCACTTTGTAGGATATATAAATGTGAAAGCACTATATTTTACAC

CTGAAACTAATATAACATTGTATGTCTACTACTACTTTAA----------------TTAAAA-----AGAGCTCTACATT

-----CCAAAAAT-----------------------ATGGTTGCAAAAATTATATAATTACACAT

>Desmodus_rotundus

AAAA-TTAAGGCGATGGCCTCAACTCTAACCTTTCTC---CAAT--TATACATC--------------------------

--------------------------------------------------------------------------------

--------------------------------------------------------------------------------

---TGCAATAAGATTGCAGGCACAAGCAGGCGCAATAAGATTGCAGA---TATATAATTATACAT

>Murina_aurata_feae

GAAA-TTATGGCAATGG-CTCAACTCTCAACTTTCTC---AGATTGTTTATATC--------------------------

--------------------------------------------------------------------------------

--------------------------------------------------------------------------------

---------AATA-----------------------ATGATTGCAGAGATTATGTATTTACACAT

>Equus_caballus

AAAAGAAAAGGCAATGGCCTCAATTCTCACCCTTCTC---AGA----TTATGTC--------------------------

--------------------------------------------------------------------------------

--------------------------------------------------------------------------------

---------AATA-----------------------ATAATTGCAGAGGTTATCTAATTACACAT

>Sus_scrofa

GAA-GAAGGGACAAAGGCCTGGACTCTCACCATTCTC---AGACTGTTTATATC--------------------------

--------------------------------------------------------------------------------

--------------------------------------------------------------------------------

---------AAAA-----------------------ATTATTTCAGAGATAATACAGTTATACCT

>Felis_catus

AAAA-ATAAGGTAATGGTCTCAACTGTCAACCTTCTC---AGATTG-TTTTGTC--------------------------

--------------------------------------------------------------------------------

--------------------------------------------------------------------------------

---------GATA-----------------------ATGATGGCAAAGATTATGTACTTACCATT

**Marker Espe12_L**

>L1-4_PVa

-------------------------------------------------------GAAAAGATATATGCA-CCCCTATGT

TCACTGCAGCACTATTTACAATAGCCAAGATATGGAAGCAACCTAAGTGCCCATCAATAGACAATTGGATAAAGA--AGW

TGTGGTA------------CATATATACAATGGAATATTACTCAGCCATAA--AAAAATGAAATCTTACCATTTGCAACA

ACATGGATGGACCTAGAGGGTATTATGCTAAGTGAAATAAGTCAGACAGAGAAAGACAAATACCATATGATTTCACTTAT

ATGTGGAATCTA--------------AAGAACAAAATAAATGAACAAACAAAATGAAAACAGACTCATAGATAC-AGAGA

ACAAACTGGTG-ATTGCCAGATGGGAGGGGGGTTGGG-GGGCTGGGTGAAAAAGGTGAAGGGA---------TTAAGAAG

TACAAATTGGT---------------------------------------------------------------------

--------------------------------------------------------------------------------

--

>L1MA9_3end

-------------------------------------------------------GAAGAGATATCTGCA-CTCCCATGT

TCATTGCAGCATTATTCACAATAGCCAAGATATGGAAWCAACCTAAGTGTCCATCGACGGATGAATGGATAAAGA--AAA

TGTGGTA------------TATATACACAATGGAATATTATTCAGCCTTAAAAAAGAAGGAAATCCTGCCATTTGTGACA

ACATGGATGAACCTGGAGGACATTATGCTAAGTGAAATAAGCCAGGCACAGAAAGACAAATACTGCATGATCTCACTTAT

ATGTGGAATCT----------------------------------------AAAAAAGTCAAACTCATAGAAGC-AGAGA

GTAGAATGGTG-GTTGCCA---------GGGGCTGGG-GGGTGGGGGAAATGGGGAGATG--------TTGGTCAAAGGG

TACAAAGTTTCAGTTATGCAGGATGAATAAGTTCTGGAGATCTAATGTACAGCATGGTGACTATAGTTAATAATACTGTA

TTGTATACT-----------------------------------------------------------------------

--

>Eonycteris_spelaea

CAAATATTTGCTCTGTCCATTTCAT-AAGATTGTTGTAAAATCAAATGT-GT---AAAGAGATAT--GCAGCTCCTGTGT

TCATTGCAGCATTATTTACAACTGC-AAGACATGAAAGCAACCTAGATGTTCATCTATAGGTGAATGGATGAATA-----

TGTGGTA------------CATATATACAACGGAATATTACCCAGCCATAAAAAAGAATGAAATCTTACCATCTGTGACA

ACACAGATGGATCCAGAGGATATTATGCTAAGTGAAATAAGTCAAGCAGAGAAAGACAAATGCTGTATAGTTTCA-ATAT

ATATGAAATCT---------------AAAAAGCAGAACAG------AACAAAATAAAAACAGACTCATAGAAACAAAAGA

CCAAAGGGATG-ATTACCAGAGAAGT--TGGATTGGTGGGGATGGGTAAAAAGGGAAACGGGGATATGTGAATAATATTG

TGATAAGTTTACACAGTGACAGATAAGTA----CTAGAATCA----GTGG-GCATGG-AACTAATATAAACAATATAAGA

TTGTATACTGAC-ATACGTAAATAAA---AATTCAGATAAAAATATTTC--TAATTGTA-TACTATTGCTGGTATATTCA

AA

>Pteropus_vampyrus

CAAATATTTGCTCTGTCCATTTCAT-AAGATTGTTGTAAAATCAAATGTGGT---AAAGAGATAT--GCAGCTCCTGTGT

TC-----------ATTTACAACTGCCAAGATATGGAAACAACCTAGATGTTCATTTATAGGTGAATGGATGAATA-----

TGTGGTA------------CATATATACAATGGAATATTACTCAGCCATAAAAAAGAATGAAATCTTACCATCTGTGACA

ACATGGATGGATCCAGAGGATATTATGCTAAGTGAAATAAGTCAAGCAGAGAAAGACAAATACTGTATAGTTTCACGTAT

ATGTGAAATCT---------------AAAAAGCAAAACAG------AACAAAATAAAAACAGACTCATAGAAAC-AGAGA

CCAAAGGGATG-GTTACCAGAAAAGT--TGGATTGGT-GGGATGGGTAAAAAGGGAAAGAGGAATATATGAATAATATTG

TGATAAATTTACACAGTGACAGATAAGTA----CTAGAATTA----GTGGGACATGG-AACTAATATAAACAATATAAGA

TTGTATACCAAGCATACTTAAATAAA---AATTCAGATCAAAATATTTCATTAATTGTA-TACTA-CGCTAGTATATTCA

AA

>Hipposideros_armiger

CAAATATTTGCTCTGTCCATCTCGT-ACGACTGTTGTAAAATCAAATGTGGC---AAAGA--TATATGC-GCCCCTAGGT

TCAGTGCAGCATTATTTACAACAGCCAAGATATGGAAGCAACCTAGGTGTCCATCGGTCGATGAATGGATACATA--AGA

TGTAGTA------------TATATATACAATGGAAT-TGACTCA-CCATATAAAAGAATGAAATCTTACCATTTGAGAAA

ACATGG-TGGATCTAGAGGGTATTGTGTTAAGTGAAGTAAATCAGACAGAGAAAGACAAATACCATGTGGTTTCACTTAT

ATGTGGGATCTCATAGAAATCAAACAAACAAACAAACAAACAAACAAACAAAACAAAAACAGGCTCACAGAAAC---AGA

CCAAAGGAATGTGTTGCCAGAAGGGA--AGGGCTGG--AGAATGAGTGAAAGGAGAAGGGGAATATAGTTAACAATATTG

TGACAAGTTTACATGATGACAGATGATTA----CTAGAATTA----GTGGAGCCTGA-AACTAATATAACCAATATAAGA

TTGTATACCAACTAAACTTAAATAAA---CATTCAGATAAAAATATTTCATTAATTGTA-CACTA-TGCTG-TGTATTCA

AA

>Megaderma_lyra

CAATTATTTGCTCCGTTCATGTTGT-AAGATTGTTGTAAAATCAAATATGAT---AAAGA--TAT--GC-GCCTCTATGT

TTATTGCAACATTATTTACATAGCCAAAGATATGGAAGCAACCTAGATGTCTGCTGATAGATGACTAGATAAAGATGAGA

GATAATACTCTCACACTCGCACTCATACAATGGAGTATTACTCAGCCACAAATAAGAATGAAATCTTACCATTTGAGACA

ACATGGGTGAATCTAGGGGGTATTATGCTATGTGAAGTAATTCAGACAGAAAGAGACAAATACTATATGGTTTCACTTAT

ATGTAGAATCTT--------------AAAAAACAAACCAG-AAACAAACAAAACAAAAACAGGCTCATAGAAAC---AGA

CCAAAGGATTATGTTATCAGAAGGGA--GGGGCTGGG-AGAATGGGTAAAAGGGAAAATGGAATATAGTTAATAATAT--

TGATAAGTTTACATAGTAAGAGTTGATTA----CTAAAATTA----GTGGGGCCTGAAAACTA--ATAACCAATGTAAGA

CTGTATACCAACTATAGTTAAATAAA---AATTTAGACAAAAATATTTCATTAATTGTA-CACTA-TGCTGGCATATTCA

AA

>Desmodus_rotundus

CAAATATTTG----GTCTATCTCAT-AAGATTGTTATAGAATCAAATGTGGT----------------------------

--------------------------------------------------------------------------------

--------------------------------------------------------------------------------

--------------------------------------------------------------------------------

--------------------------------------------------------------------------------

--------------------------------------------------------------------------------

--------------------------------------------------------------------------------

-----------------------------CATTTGCATCAAATTATTTAATTAATTTTA-CACTG-TACTGGTGTATTCA

AA

>Miniopterus_natalensis

CAAATATTTGTTCTGTCCATCTCGTAAAGATTGTTGTAAAATCGAATGTGGT----------------------------

--------------------------------------------------------------------------------

--------------------------------------------------------------------------------

--------------------------------------------------------------------------------

--------------------------------------------------------------------------------

--------------------------------------------------------------------------------

--------------------------------------------------------------------------------

-----------------------------CATTCAGATCAAATTACTTTATTAATTGTA-CAGT--CACTGGTGTTTTCA

AG

>Equus_caballus

CAAATACTTGCCCTGTCCTTCTCGG-AAGATTGTTGTAAAATCAAATGTAGC----------------------------

--------------------------------------------------------------------------------

--------------------------------------------------------------------------------

--------------------------------------------------------------------------------

--------------------------------------------------------------------------------

--------------------------------------------------------------------------------

--------------------------------------------------------------------------------

-----------------------------AATTCAGATCAAAATATTTCATTAATTGTA-CAATA-CATTGCTGTATTCG

AA

>Bos_taurus

CAAGTAAATGCCCCTTA---------AAAATGGTTGTAAAGTCACATGTTGT----------------------------

--------------------------------------------------------------------------------

--------------------------------------------------------------------------------

--------------------------------------------------------------------------------

--------------------------------------------------------------------------------

--------------------------------------------------------------------------------

--------------------------------------------------------------------------------

-----------------------------AATTCAGATCAAAATAGATCATTAACAGCA-CACTA-CATT-TTGTATTCA

AA

>Canis_familiaris

CAAATACTTGCCTTGACTATCTTGT-AAGATTGTTGGAAAATCAAGTGTGGT----------------------------

--------------------------------------------------------------------------------

--------------------------------------------------------------------------------

--------------------------------------------------------------------------------

--------------------------------------------------------------------------------

--------------------------------------------------------------------------------

--------------------------------------------------------------------------------

-----------------------------CATTCAGATCAAAATGTTTCCCTAATTGTGCCACTA-CACTGATATATTCA

GA

**Marker Espe13_L**

>L1-3_PVa

---------------------------------------------------------GATGATTGGATAAAGAAGATGTG

GTACATATATACAATGGAATATTACTCAGCCATAAGAAAAGATGAA----------------------------------

--------------------------------------------------------------------------------

--------------------------------------------------------------------------------

--------------------------------------------------------------------------------

--------------------------------------------------------------------------------

--------------------------------------------------------------------------------

--------------------------------------------------------------------------------

-------------------------------------------------------------------------ATACTGC

CATTTGTGACAACATGGATGGATCTTGAGATTATCATGCTAAGCGAAATAAGTCAGACA-GAAAAAGTTGAGAACCATAT

GATTTCACTCA------TATGTGGGATATAAAACTGAAAGCAACAA----ACAAACAAGACAA----ACAAACAAAA-CT

CATGGACACAGACAACAGTTTAGTGGTTACCAGAGGGAAAGGGGGG-AG-GGGGAGGTAGATAAGGGTAAAGGGGGTCAA

ATATATGGTGACGGAAGGAGATTTGACTTTGGGTGGTGAACACACAATGCAATATACATATGATGTATTATTGAATTGTA

CACTTGAAACCTA-TATAATTTTATTAACCAATGTCACCCCAATAAATTTAAT-------TTAAAAAATA----------

--------------------------------------------------------------------

>Eonycteris_spelaea

GGGAAATATTTTTCAAATTCTAATACCTATAA-GGTT---AAAAATAGTTTCAG---GATGATTGGATAAAG---ATATG

GTACATATGTAAAATAGAATATTACTCAGCCATAAGAAAAGATGAA----------------------------------

--------------------------------------------------------------------------------

--------------------------------------------------------------------------------

--------------------------------------------------------------------------------

--------------------------------------------------------------------------------

--------------------------------------------------------------------------------

--------------------------------------------------------------------------------

-------------------------------------------------------------------------ATACTGC

CATTTGCAACAACGTGGATGGATTCTGAGAATATCACGCTAAGCGAAATAAGCCAGTTG-AAAAAAGTCAAGAATAGTAT

GATTTCACTCA------TACACGAAATACAAAACTGAAAACAACAAGTGAATAAACAAG--------ACAAATAAAAACT

CATAGACACAGACAACAGTATGGTGGTTACCAGAGGAAAAGTGGGA-GGTGAGGAAGTAGAAAATGGTAAAGGGGATCAG

ATTTATGCTGATGGAAGGAGACTTGACTTTGGATGGTGAACACACAAAGCAATATATAGATGATGTATTATTGAATTGTA

CACTTG-AATCTA-TATAATTTTATTAAC---TGTCTCCTCAATAAATTTAATAAAATTTTTAAAAAATAGAC---AGAA

TTAATTTCAA---GAGAAT----TGCATGTAACAAT-AAAGAGTGTAGAACTGTACATCTAATTATTA

>Pteropus_vampyrus

GGGAAATATTTTTCAAATTCAGATACCTATAA-GGTT---AAAAATAGTTTCAA---GATGATTGGATAAAG---ATGTG

GTACATATATACAATAGAATATTACTCAGTCATAAGAAAAGATGAA----------------------------------

--------------------------------------------------------------------------------

--------------------------------------------------------------------------------

--------------------------------------------------------------------------------

--------------------------------------------------------------------------------

--------------------------------------------------------------------------------

--------------------------------------------------------------------------------

-------------------------------------------------------------------------ATACTGC

CATTTGCGACAACATTGATGGATCTTGAGAATATCATGCTAAGCGAAATAAGCCAGTTGAAAAAAAGTTATGAACAGTAT

GATTTCACTCA------TATGCAGAATACAAAACAGAAAGCAATAAGTGAACAAACAAGACAA----ACAAATAAAAACT

CATAGACACAGACAACAGTATGGTGATTACCAGAGGAAAAGTGGGA-GGTGAGGAAGTAGAAAAAGGTAAAGGGGGTCAG

ATATATGCTGATGGAAGGAGACTTGACTTTGAGTGGTGAACACACAATGCAATATACAGATGATGTATTATTGAATTGTA

CACTTGAAACCTA-TATAATTTTATTAACCAACGTCTCCTCAATAAATTTAATAAAATTTTAAAAACATAAAC---AAAA

TTAATTTCAA---GAGAAT----TGCATGTTACAAT-AAAGAGTGTAGGACTGTAAATCTAATTATTA

>Hipposideros_armiger

GGGAAATATTTCTCAAATTCAAAGACCTATAA-GGTT---AAAAATAGTTTCAA---GGTGATTGGATAAAAAATATGTG

GTACATATATACAATGGACTACTATTGAGCCATAAGAAAACATGAA----------------------------------

--------------------------------------------------------------------------------

--------------------------------------------------------------------------------

--------------------------------------------------------------------------------

--------------------------------------------------------------------------------

--------------------------------------------------------------------------------

--------------------------------------------------------------------------------

-------------------------------------------------------------------------ATACTGC

CATTTGGGACAACATGGATGGATCTTGAGACTATTATGCTAAGTGAAATAAGTCAGATG-AAAAAAGTCAAGAACCATAT

GGCTTCACTCATATGAGTATGTAGGATATAAAACTGAAACCAACAAATGAACAATCAAGACAA----AGAAACAAAAACT

TATAGATACAAACAACAGTATGGTGGTTACCATAGGGAAAGGGGGGTGGAGGGGAAGCAGAACAGGGTAAAGGGGATCAA

ATATATAGTGATCAAAGAAGATTTGACTTTGGGTGGTGAACACA--------------GATGATGTATTATAGAAATATA

CACTTGAAACCTA-TATAATTTTATTAATCAGTGTCATCCCAATAAAGTTTAAAAA-------------AATA---AAAA

TTAGTTTCAA---GAGAAT----TGCACA----AATAAAAGAGTATACGATTATCAATCTAATTGTTG

>Megaderma_lyra

GAGAAATATTTTTCAAATTCAAAGACCTATAATGGTT---AAAAACAGTTTCAA---GATGATTGGCTAAAGAAGAGGTG

GTACA-ACATAGAGTGGAATACTATTCAGCAAAAAGAAAAGGTCAAAATCCCAGGTATACCAAAAAAACTATACACATTT

TAAGAGATGTTATATATGTATTACTTTTCGAAGTTAAATTGAATTACAGTGGTAGCAATGTGTAGTGTGATTTTCGCTTA

AAAGATGGCATTATCAGATGAATGCTAGTGTCACCGTGCGACAGGCAGGACAAAGAAAATGGTGGAAGCATGGTTGTCAT

TGAAGGAGCACGAGACCGTTTTGAAGTGGCATTTGAAAACCAGGAACATTCTTTGAGTTTCCCCCACGTTCTCCTGAGTT

CACACCCCTTGACTTCTACCTATGGAGGACCGTAAATGACGTGGTGTACCATAGGAAACCAGACACACTGGAGGTACTTC

AGGAAGAAACTGAAATGGCATGCACAGAGACATGAGTGGACACTTTGGTCAACACTGTTCAAGCAGTAGTTGGCCATAAC

CAGAAGTCTGGGTGCTGATGGTCACCGCTTTGAGCACCTGTTGTCATTGCTGAAGTCAAAGGTGACTTGTATTCATCTTT

TGTTATCAGTATATATTAAGCATTACAATTTTAATTTTTTCTTAAAATGTGTATACATTTTTTAACTCCCTCTATATTGT

TATTTGTGATGAAATGGATGGGTTTTGAGATTATCATGCTAAGTGAAATAAATCAGATG-GAAAAAGTCAAGAATCATAT

GATTTCACTCA------TATATAGGGTATAAAACTGAAAGCAATAAATGAACAAACAAGACAAACAGACAAACAAAAACA

CATAGACACAGACAAC---------------AGAGGGAA--------ATGGGGGAGGTAGAAAAGGATAAAGTGGGTCAA

CTATATGGTGACAAAAGA-----TTTGACTGGGTGGTGAACACAGAAGGTAATATATGGATGATGTATTATAGAATTGTA

CACTTGAAGTCCACTAAAATTTTATTAACCAATGTTACC-CAATAAATTTAATAAATT-----AAATAGATTA---AAAA

ATAGTTTCAA---GAGAAT----TGCATATAAAAATATAGGGGTACAGGATTATAAATCTCATTATTA

>Desmodus_rotundus

GAGAAATATTTTTCAAACTTAAAGAATTATAA-GGTT---AAAAATAGTTTCAA--------------------------

--------------------------------------------------------------------------------

--------------------------------------------------------------------------------

--------------------------------------------------------------------------------

--------------------------------------------------------------------------------

--------------------------------------------------------------------------------

--------------------------------------------------------------------------------

--------------------------------------------------------------------------------

--------------------------------------------------------------------------------

--------------------------------------------------------------------------------

--------------------------------------------------------------------------------

--------------------------------------------------------------------------------

--------------------------------------------------------------------------------

--------------------------------------------------------------------------------

-------------GAGAAT----TGCATATAGCAATAAAAGGACGTAGGATTGTGAACGTAATTACTG

>Myotis_brandtii

GGGAAATATTTTTCAGCCTCAAAGACCTATAA-GGTT---AAAAATGGTTTCAA--------------------------

--------------------------------------------------------------------------------

--------------------------------------------------------------------------------

--------------------------------------------------------------------------------

--------------------------------------------------------------------------------

--------------------------------------------------------------------------------

--------------------------------------------------------------------------------

--------------------------------------------------------------------------------

--------------------------------------------------------------------------------

--------------------------------------------------------------------------------

--------------------------------------------------------------------------------

--------------------------------------------------------------------------------

--------------------------------------------------------------------------------

--------------------------------------------------------------------------------

-------------GAGAAT----TTCACATAGCAATAAAAGGGTGTAGGAGTGTAAACATAATTATTG

>Equus_caballus

GGGAAATATTTTTCAAACTCAGAGGCCTATAA-GGTT---AAAAGTAATTTCAG--------------------------

--------------------------------------------------------------------------------

--------------------------------------------------------------------------------

--------------------------------------------------------------------------------

--------------------------------------------------------------------------------

--------------------------------------------------------------------------------

--------------------------------------------------------------------------------

--------------------------------------------------------------------------------

--------------------------------------------------------------------------------

--------------------------------------------------------------------------------

--------------------------------------------------------------------------------

--------------------------------------------------------------------------------

--------------------------------------------------------------------------------

--------------------------------------------------------------------------------

-------------GAGAAT----TACACATAGCAATCAAAGGGTGTAGGGTTGTAAATCTAATCATTG

>Bos_taurus

GAGAAATATTTTTCCAAGTCAAAGACCTATAA-GGCT----AAAGTAGTTTCAG--------------------------

--------------------------------------------------------------------------------

--------------------------------------------------------------------------------

--------------------------------------------------------------------------------

--------------------------------------------------------------------------------

--------------------------------------------------------------------------------

--------------------------------------------------------------------------------

--------------------------------------------------------------------------------

--------------------------------------------------------------------------------

--------------------------------------------------------------------------------

--------------------------------------------------------------------------------

--------------------------------------------------------------------------------

--------------------------------------------------------------------------------

--------------------------------------------------------------------------------

-------------AAGCACTGCATGCACATGGCCAAGAAAGGGTGTAGGACTATAAGTCTAATCACTG

>Canis_familiaris

GGGAAATGTTTTTTAAACTCAACGACCCAGAA-GGTT---AAAAGTAGTTTTAA--------------------------

--------------------------------------------------------------------------------

--------------------------------------------------------------------------------

--------------------------------------------------------------------------------

--------------------------------------------------------------------------------

--------------------------------------------------------------------------------

--------------------------------------------------------------------------------

--------------------------------------------------------------------------------

--------------------------------------------------------------------------------

--------------------------------------------------------------------------------

--------------------------------------------------------------------------------

--------------------------------------------------------------------------------

--------------------------------------------------------------------------------

--------------------------------------------------------------------------------

-------------GAGAAT----TGCACATAGCAATAAAAGGGAGTGGGATTACAAATCTAATCATTG

**Marker Espe15_L**

>L1-4_PVa

--------------------------------------------------------AGAACAAAATAAATGAACAAACAA

AATGAAAACAGACTCATAGATACAGAGAACAAACTGGTGATTGCCAGATGGGAGGGGGGTTGGGGGGCTGGGTGAAAAAG

GTGAAGGGATTAAGAAGTACAAATTGGTAGTTACAAAATAGTCACGGGGATGTAAAGTACAGCATAGGGAATATAGTCAA

TAATATTGTAATAACTATGTATAGTGCCAGGTGGGTACTAGACTAATCGGGGGGATCACTTCGTAAATTATATAAAT---

-------------GTCTAACCACTATGCTGTACACCTGAAACTAATATAAAATAATATTGAATGTCAACTCTAATTGAAA

AA------------------------------------------------------------------------------

--------

>Eonycteris_spelaea

AACTATCTAAAATATGGTTATATTTTCCAAATGAG---AAGACAGCTTAGGAT---AAAACAAAATAAA----CAAACAA

AAC--AAATAGATTCATGTACATGGAGAGCAAACTGATGGTTGCCAATTGAGAAGGGGCTTGAGGAGCTGGGTGAGAA-G

GTGAAGGGATTAAGAACTACAAATTAACAGTTACAAAATAGTCACAGGGATCTAAAGTACAGCATAGGGAATATAGTCGA

TAATATTGTAATAACTATATAAGGTACCAGGTGCATACTAGTCTCAGGGGGGAGATCACTTTGTAAAGTGTATAAATAAA

T------------GCCTAACCACTGTGCTGTACACCTGAAACTAAT-----ATAATATTGAATATCAACTGTAATTTAAA

-----AATTTTGTTAAAGAT---GGATAATTT----------CCAAAGCCAAATGGGATAATTGTTGTCTTTAT-----C

ACCACTCT

>Pteropus_vampyrus1

AACTATCTAG--TATGGTTATATTTTTCAAATGAG---AAGACAGCTTAGGAT---AAAACAAAATAAA----CAAACAA

AAC--AAACAGATTCATGTATATGATGAGCAAACTGATGGTTGCCAATTGAGAAGGGGCTTGAGGAGCTGGGTGAGAA-G

ATGAAGGGATTAAGAACTACAAATTGGCAGTTGCAAAATAGTCACAGGGATCTAAAGTACAGCATAAGGATTATAGTCAA

TAATATTGTAATAACTATATAAGGTACCAGGTGCGTATTAGTCTTATGGGGGCGATCACTTTGTAAAGTATATAAAT---

-------------ATCTAACCACTGTGCTGTACACCTGAAACTAAT-----ATAATATTGAATATCAACTGTAATTTAAA

-----AATTTTGTTAAAGAT---AGGTAATTT----------CCAAAGCCAAATGGGATAATTGTTGTCTTTAT-----C

ACCACTCT

>Pteropus_vampyrus2

AACTATCTAG--TATGGTTATATTTTTCAAATGAG---AAGACAGCTTAGGAT---AAAACAAAATAAA----CAAACAA

AAC--AAACAGATTCATGTATATGATGAGCAAACTGATGGTTGCCAATTGAGAAGGGGCTTGAGGAGCTGGGTGAGAA-G

ATGAAGGGATTAAGAACTACAAATTGGCAGTTGCAAAATAGTCACAGGGATCTAAAGTACAGCATAAGGAATATAGTCAA

TAATATTGCAATAACTATATAAGGTACCAGGTGCGTATTAGTCTTATGGGGGAGATCACTTTGTAAAGTATATAAAT---

-------------ATCTAACCACTGTGCTGTACACCTGAAACTAAT-----ATAATATTGAATATCAACTGTAATTTAAA

-----AATTTTGTTAAAGAT---AGATAATTT----------CCAAAGCCAAATGGGATAATTGTTGTCTTTAT-----C

ACCACTCT

>Hipposideros_armiger

AACTATCTAG--TGTGATCACATTTCCCAAATGAA---AAGACAGCTTAAGAT---GAAACAAAATAAACTAACAAACAA

AACAGAAACAGACTCAG--ATACAGATAGCAAACTGATGGTTGCCAGTTGGGAGACATGTTGGAGGGCTGGGTCAGAAAG

GTGAAGGGATTAAGAAATACAGATTGGCAGTTACAAAACAAC----------------ACAGCATAGGGA--ATAGTCAA

TAATAGTGTAATAACTATGCATGATTTCCGGTGGGTACTAGAGTTATCAGGGAAATCACTTTGTAAGTTATATAAACTTA

TATAGTTATATAAGTCTAACCACTATGCTGTACACCTGTAACTAAT-----ATAGTATTGAATGTCAATTGTAATTGGAA

-----AAAAAAAA-AAAGAT---GGATAATTTCCATATATAGCCAAAGCCAAATGGGATGAATTTTGTCTATAT-----C

ACCCCTCC

>Megaderma_lyra

CACTATCTAG--TGTGGTTATATTTCCCAAATGAG---AAGATAGTTTAAGAT---GCAACAAAATAAACTAATAAACAG

AACAGAAACAGACACAG--ATACAGAGAACAAACTGATGGTTGCCAATTGGGA--------GCGGGACTGGGTGAGAAAG

ATGAAAGGACTAAGAAGTACAAATTAGCAGTTGCAAAATAGT----------------ACAGCATAGGGAA-ATAGTCAA

TAATATTGTAATA-CTATGCATGGTGTCAGGTGGGTA-TAGACTTATAGGAG-GATCGCTTCGGAAGTTACATAAAC---

-------------GTCTAACCACTATGTTGTACACCTCCAACTAAT-----ATAATATTGAATGTCAAGTGTAATTGGGA

-----AAAA-----AATGAT---GGATAATTTTCATATATAGCCAAAGCCAAATGGGATGAATTTTGTCTTTAT-----C

ACCCTTCC

>Desmodus_rotundus

AACTACCTAG-----TGTTCTGTCTCCCAAATGAG---AAGACAGCTTAACAT---------------------------

--------------------------------------------------------------------------------

--------------------------------------------------------------------------------

--------------------------------------------------------------------------------

--------------------------------------------------------------------------------

-----------------------GGGTAATTTCCATATGTACCTGAAGCCA-GTGGGATGAATTTTGTCTTTAC-----C

ACCCCTCC

>Myotis_brandtii

AACTCTCTGG--TATGGTTCTATCTCCCAAATGAG---AAGACAGCTTAAAAT---------------------------

--------------------------------------------------------------------------------

--------------------------------------------------------------------------------

--------------------------------------------------------------------------------

--------------------------------------------------------------------------------

-----------------------GGATAATTTCCATCTATAGCTGAAGCCAAG-GGGGTGAATTTTGTCTTTAC-----C

ACCCCTCC

>Equus_caballus

CATTTTCAATGCTATGGCTCTATCTCCTAAAAGAG---AAGACAGCTTAAGAT---------------------------

--------------------------------------------------------------------------------

--------------------------------------------------------------------------------

--------------------------------------------------------------------------------

--------------------------------------------------------------------------------

-----------------------GGATAATTTCTGTATCCAACCAAAGCCAAGTTGGATGAATTTTGTCTTCAT-----C

ACCCCTCT

>Bos_taurus

AACTATCAAG--TATGTTTGTATCTCCAAAGAGAG---AAGACATTTTAAGAT---------------------------

--------------------------------------------------------------------------------

--------------------------------------------------------------------------------

--------------------------------------------------------------------------------

--------------------------------------------------------------------------------

-----------------------AGATAATCTCCATATTCAACCAATGTCAAATTGGATAAATTTTGTCTTCACACAACC

CCCCTCCC

>Canis_familiaris

AACTATCTG---TATGGTTATACTTCCCAAATGGG---AAAATAGCTTAAGGC---------------------------

--------------------------------------------------------------------------------

--------------------------------------------------------------------------------

--------------------------------------------------------------------------------

--------------------------------------------------------------------------------

-----------------------GGATAATTTCCATAATCAATCAAAGCCAAATTGCTTGAATTTTGTCTTTAT-----A

ACCCCTTC

**Marker Espe16_L**

>HAL1-3_PVa

------------------------------------------------------------------------------CA

TA---GATACAGAGAACATTTTGATGGTTGCCAG----------ATGGGAGGGGGGTTGAGGGGGGTGGGTGAAAAAGGG

GAAGGGATTAAGAAGTACAAATTGGTAGTTACAAA-ATAGTCATGGGGATGTAAAGTATAGCATAAGGAATATAGTCAAT

AATATTGTAATAACTAT---------------------------------------------------------------

-------------------GTATGGTGTCAGAT--------GGGTACTAGATTTATCGGGGTGATCACTTCGTAAGTTAT

ATAAATGTCTAATCACTATGTTGTACACCTGAAACTAATATAATATCGTATGCCAACTGTAATTGAAAAATAAAAAAATT

ATTTTAAAAAAA--------------------------------------------------------------------

----

>Eonycteris_spelaea

AAGGAACTACTAATTAATCATCC-TGATGT------CTTTG-------------------------AACATAAATGACCA

TA---GATACAGAGAACATTTTGATGGTTGCCAG----------ATGGGAGA-GGGTTTGGGGGGATGG-TGAAAAA---

---GGAATTAAGATGTACAAATTCCCAGTTATAAAGACA-TCACGGAGATGGAAAGTACAGCATAGGAAATATAGTCAAT

AATATTGTAATAATTAT---------------------------------------------------------------

-------------------GTACGGTGTCAGTC--------AGGTACTAGACTTAATGGGGTGATTATTAC---AGTTAT

ATTAATGTCTAATCACCATGTTGTACACCTTAAATTAATATAATATTGTGTATCAACTGAAATTGGAAAAAAAAGTTA--

AAAAAAAAA------AAAGTAAATGACCTGA---TTTCTTTGAGACCCCTTCCTGTGTCATTCTTTCAGTTGTGTTTGGA

AGGC

>Pteropus_vampyrus

AAGGAACTACCAATCAATCATCC-CGATTT------TTTGG-------------------------AATGTAAATGACCA

TA---GATACAGAGATCATTTTGATGGTTGCCAG----------ATGAGAGA-GGGTTTGGGAGGATAGGTGAAAA----

-A-GGAATTAAGATGTACAAATTCCTGATTATAAAGACAGTCACAGGGATGGAAAGTACAGTATAGGAAATATAGTCAAT

ATTATTGTAATAACTAT---------------------------------------------------------------

-------------------GTATGGTGTCAGTT--------GGGTACTAGACTTATTGGGGTGATTACTAC---AGTTAT

ATAAATGTCTAATCACTATGTTGTACACCTTAAATTAATATAATATTGTGTATTAACTGAAATTGAAAAAAAATGTTA--

--AAAAAAA------AAAGTAAATGACCTGA---TTTCTTTGAGATCGCTTCCTGAGTCATTCTTTCAGTTGTGTTTGGA

AGAA

>Hipposideros_armiger

TAAGGGCTACCAATTA----TTC-TGATTT------TTTTG-------------------------AAAGGAAATGACCA

TA---GACAC--AGAACATTTTGAAGGTTGCCA-----------ATGGGAGA-GGGCTTGGAGGGATGGGTGAAAAGGGG

AA-GGGATTAAGATGTACAAATTACCAATTATGAAAACTGTCATAGGAATGGAATGTACAGCATAGGGAATATAGTCAAT

AATACTGTAATAATTATTGGGTTGTCGGGAAAATCATGATGCATTTTTGCATCGAAAAACATCGAAAAATACGTCATGAC

TTTCCCGACAAACCAATATATATGATGTCAGATATAGATAAGGGTACTAGACTAATTGGGATGATTATT-CATAAGTTAT

ATAAATGTCTAATCATTATAGAGTACACCTGATACTAGTATTATATTGTATGTCAACTGTAATTGAAAAAAAATAGTGTT

AATAAAAAG------AATGGGAGAGAGCTGA---TTTCTTTAAGACTACTTCCTAACTCATTCTTTTAGTTGTATTTGGA

AGTG

>Megaderma_lyra

TAAAGACTACCAATTA----TTC-TGGTTT------TTTTGG------------------------AAAGTAAATGACCT

GA---GATATAAGGAACATTTTGATGGTTGTCAGGTGGGCTTAGATGAGAGC-GGGCTTAGAGGCATGGGTGAAAA----

-A-GGAATTAAGATGTACAAATTGTCACTTATAAAAACAGTCACTGGGATAGAAAGTACAGCATCGGGAATATAGTCAAT

ATTTTAATAACTAT------------------------------------------------------------------

-------------------GTATGGTGTCAGAT--------GGGTGTTAGGCCTATTGGGGTGATCAATACATAAGTTAT

ATAGATGTAAAGACACTTTAGTGTACACCTGAAACTAATAT---ATTGTATGTCAACTGTAATTAAAAAATAATAAAAA-

AATTTTTTA------AATGCATGTGACCTGA---TTTCTATCAGATTTTTTCCTAATTCATT----TACTTGTATTTGGA

AGTG

>Desmodus_rotundus

AAAGAACTACCAATCA----GTT-TGATTT------TTTTTTTTTT--------------------TAAGTAAATGATCT

GA------------------------------------------------------------------------------

--------------------------------------------------------------------------------

--------------------------------------------------------------------------------

--------------------------------------------------------------------------------

--------------------------------------------------------------------------------

----------------------------------TTCCTTTCAGGCTTCCTCCTAACTCATTCTCCTGGGTGTGTTTGGA

AGTG

>Myotis_brandtii

AAAGGACTACCAATCA----TCC-TGATTT------TTTTA-------------------------AAAGTAAATGATCT

GA------------------------------------------------------------------------------

--------------------------------------------------------------------------------

--------------------------------------------------------------------------------

--------------------------------------------------------------------------------

--------------------------------------------------------------------------------

----------------------------------TTTCTTTCAGTCTTCTTCCTAACTCATTCTCCTAGTTGTGCTTGGA

AGTG

>Equus_caballus

AAAGGTCTACCAATGA----TCCCTGATTT------TTTGG-------------------------TAAGTAAATGACTT

GA------------------------------------------------------------------------------

--------------------------------------------------------------------------------

--------------------------------------------------------------------------------

--------------------------------------------------------------------------------

--------------------------------------------------------------------------------

----------------------------------TTTCTTTCAGTCTCCTCCCTAACTCATTCTTTTCATTGTGGTTGGA

AGCG

>Bos_taurus

AAGGGACTGCTAATCA----TCCATGTTTT------TTTTTTTTTAACCCCC--------------TAAATAAATGACCT

GA------------------------------------------------------------------------------

--------------------------------------------------------------------------------

--------------------------------------------------------------------------------

--------------------------------------------------------------------------------

--------------------------------------------------------------------------------

----------------------------------TTTCTTTTAGTCTTCTTCCTAACCCATTCTTT---------TTGGA

AGTG

>Canis_familiaris

AAAGGACTACCAATCA----TCCCTGATTTGATTTGTTTTTTTTTTTTTTTTTGGAAAGTA-----AAAGTAAATTACCC

CA------------------------------------------------------------------------------

--------------------------------------------------------------------------------

--------------------------------------------------------------------------------

--------------------------------------------------------------------------------

--------------------------------------------------------------------------------

----------------------------------TTTCTCTCTGTCTCCTTCCTTACTCACTCTTTCATTTGTGCTCGGA

AGGG

**Marker Espe18_L**

>HAL1-3_PVa

--------------------------------------------------------------------------------

--------------------------------------------------------------------------------

-----------------------------------------------------------------CAATAATATTGTAAT

AACTATGTATGGTGTCAGATGGGTACTAGATTT-----------------------------------ATCGGGGTGATC

ACTTCGTAAGTTATATAAATGTCTAATCACTATGTTGTACACCTGAAACTAATATAATATCGTATGCCAACTGTAATTGA

AAAATAAA-AAAAT------------------------------------------------------------------

-----------

>L1-4_PVa

--------------------------------------------GTCAGACAG---AGAAAGACAAATACCATATGATTT

CACTTATATGTGGAATCTAAAGAACAAAATAAATGAACAAACAAAA-TGAAAACAGACTCATAGATA-CAGAGAACAAAC

TGGTGATTGCCAGATGGGAGGGGGGTTGGGGGGCTGGGTGAAAAAGGTGAAGGGATTAAGAAGTACAA------------

--------------------------------------------------------------------------------

--------------------------------------------------------------------------------

--------------------------------------------------------------------------------

-----------

>Eonycteris_spelaea

AAACTCACTTGTTAAAAAGGTACTGTGAATT---AAAATTATTTGCCAATCAG---AGAAAGACAAATATCATATGATTT

CATTTATATGTGGAAACTAAAAAACAAA-TAAACAAACAAACCAAACAGAAA-CAAACTCAT--AT---AGAGAACAAAC

TAATCATTGCCAGATGGTAGGGGGTTGCGGGGGTTGGTTGAAAAAGGTGAACGGATTAAGA-GTACGATAATATTGCAAT

AACTATGTATGGTGCCATGTGGGCACTAGGCTT--------------------------------------------ATC

ACTATGTAAATTACATAAATGTCTAACCACTATGCTGCATACCTGAAACTAATATAATATTGTGTGTCAACTGTAATAAA

AAA-TAAATAAAATA---AAAAATATTTGCCAATGAA---TTGGAAAAA-GTGAGTAAGAAAGAGACAAATCATTTATTT

CATTATAAGTA

>Pteropus_vampyrus

AAACTCACTTGTTAAAAAAGTACTGTGAATT---AAAATTATTTGCCAATCAG---AGAAAGACAAATATCACATGATTT

CACTTATATGTGGAATCTAAAAAACAAA-CAAACAAACAAACAAAACAGAAA-CAAACTCATAGATA-CAGAGAACAAAC

TAATCATTGCCATATGGGAGGGGCTTTCAGGAGCTGGGTGAAAAAGGTGAAAAGATTAAGAAGTACGATAATATTGCAAT

AACTATGTATGGTGCCAGGTGGGCACTAGACTT--------------------------------------------ATC

ACTTTGTAAATTATATAAATGTCTAACCACTATGCTGTATACCTGAAACTAATATAACATTGTGTGTCAACTGTAATAAA

AAAATAAATAAAAAT---AAAAATATTTGCCAGTGAA---TTGGAAAAA-TTGAG--AGTAAGAGACAAATCATTTATTT

CATTATAGGTA

>Megaderma_lyra

AAACCCACTCATT-TAAAAATTATGTAAATT---AAAATTATTTGC----CAG---AGAAAGACAAACACCATATGATTT

TACTTATATGTGGAATCTAAA----AAA-GAAACAAATAAACCACATGGAAA-CAGAGTCATAGATAACAGAGAACAAAT

TGATGGTTGCCAGAGGGGAGAGGG-CTGGAGGGCAGGGTGGAAAAGGGGAAAGGATTAGGAACTACAATAATATTATAAT

AACTATGCACTGTGCCAGGTTGGCACTAAATATAGTTATTATAATATTATAACACTTCATAATAACTTATCAGGGGGATC

ACTCCATAAATTAGATAAACACCTAAGTACTATGCTATACACCTGAAACTAATATAATATTGAATGTCAAGTACAATT--

-------------GA---AAAAAAATTTGCCAATCAA---ATGTAAAAA---CAG--AATAGGAGATAAAACATTTCCCT

TATCACAGGTA

>Desmodus_rotundus

AAACTCACTCATTTAAAAAATAATGTAAATT---AAA---ATATACCAATCAG---------------------------

--------------------------------------------------------------------------------

--------------------------------------------------------------------------------

--------------------------------------------------------------------------------

--------------------------------------------------------------------------------

----------------------------------------TTGAAAAAA--TAAA--AGTAGGGGCCATGTTATTGTCTT

CATTATAAGTG

>Myotis_brandtii

AAAATCACTCATTTAAAAAATAATACCAATT---AAG--TATATTCCAATCAA---------------------------

--------------------------------------------------------------------------------

--------------------------------------------------------------------------------

--------------------------------------------------------------------------------

--------------------------------------------------------------------------------

----------------------------------------TTGAAAAAACATGAG--AGTAGGAGCCACATTATTACCTT

CATTATAGGTA

>Equus_caballus

AAGCTCGTTCATTCTAAAAATACTGCAAATT---AAAAATATTTGCCAATTGA---------------------------

--------------------------------------------------------------------------------

--------------------------------------------------------------------------------

--------------------------------------------------------------------------------

--------------------------------------------------------------------------------

----------------------------------------TTGGAAAAG-ATGAG--AGTAGAAGCCAAATTATTTCTTT

TATTATAGGTA

>Bos_taurus

AAACTCACTCACTCTAAAAATACTGCAAATT---AAAAATATTTGCCCATCAA---------------------------

--------------------------------------------------------------------------------

--------------------------------------------------------------------------------

--------------------------------------------------------------------------------

--------------------------------------------------------------------------------

----------------------------------------T--AAAAACTTACAA--AGTAGGCACT---CTGTCCCCTT

T----------

>Canis_familiaris

AAATTCACTCATTCTAAAAATATTGCAAATT---AAAAATATTTGCCAACCAA---------------------------

--------------------------------------------------------------------------------

--------------------------------------------------------------------------------

--------------------------------------------------------------------------------

--------------------------------------------------------------------------------

----------------------------------------TTAGAAAACAACGAA--AGTAGGAGCCAAATTATTTCCTT

AATTATACATA

**Marker Espe21_L**

>L1-4_PVa

--------------------------------------------------------------------------------

--GAC-----------------------------------AGAGAAAGACAAATACCATATGATTTCACTTATATGTGGA

ATCTAAAGAACAAAATAAATGAACAA------------------------------------------------------

-----------------------------------------------------

>Eonycteris_spelaea

GT---ATCCTCTCCACAAATTTTGAATCCCACAGTTTAAG---AAATTCAGGGCTA---TACCATTTGTGACAACACAAA

TGGAC-----------------------------------AGAGAAAGACAAATACTGTATGACATCACTTTCATGTGGA

ATCTAAAGAACAAAATTAACGAACAATAA------AAATTCAGAGTCG---GATGAAGTGTGT--------------TAT

CTT-----------------GTTCCAATCTGGAA-CAGTCCTGGGAATCTTGT

>Pteropus_vampyrus1

ATAAGATCCTCTCCACAAGTTTTGAATGCCACAGTTTAAG---AAATAAAGGGCTG---TACCATTTGTGACAACACGGA

TGGAC-----------------------------------AGAGAAAGAT-AATACCATATGACCTCACTTTCATGTGGA

ATCTAAAGAACAGAATTAACAAACAATAA------AAATTCAGGGCTG---GATGAAGTGTGT--------------TAT

CTTGG-TCTTCCCTACACTAGGGCCAGTCTGGAAGCAGTCCTGGGAATCCTGC

>Pteropus_vampyrus2

ATAAGATCCTCTCCACAAGTTTTGAATGCCACAGTTTAAG---AAATAAAGGGCTG---TACCATTTGTGACAACACGGA

TGGAC-----------------------------------AGAGAAAGAT-AATACCATATGACCTCACTTTCATGTGGA

ATCTAAAGAACAGAATTAACAAACAATAA------AAATTCAGGGCTG---GATGAAGTGTGT--------------TAT

CTTGG-TCTTCCCTACACTAGGGCCAGTCTGGAAGCAGTCCTGGGAATCCTGC

>Hipposideros_armiger

ATTAGATCCTCTCCACAAATTTTGAACGCTGCAGTTTAAG---AAATTCAGGGCTG---TACCATTTACAACAATATGGA

CGGACCTA-AGGGTATTATGCTAAGTGAAATAAGTCAGATGGAGAAAGACAAATACCATGTGATCTCACTTACATGTGGA

ATCTAAAGAACAAAATAAATGGAAAAAAAACC---AAAAACGAGGCTG---GATGAGATGTG---------------TGT

CTTGG-TCTT------GCCAGTGCCAGCCTGGAAACAGTCCTGGGCGTCCTGC

>Megaderma_lyra

ATAAGATCCTCTCCCCAAGTTTTGAATGTCGCAGTTGAAG---AAATTCAGTGCTG---TACCAATTGTAACAACATGGA

TGGACCTAGAGGGTATTATGTTAAGTGAAATAAGTCAGACAG-GAA-GACAAATACCATATTATCTCACT-------GGA

ATCTAAAGAACAAAATAAATGAACAA---------AAATTCTGGGCTG---GATGAGGTGTG---------------TGT

CTTGGGTCTT------ACCAGTGCCAGTCTGGAAACAGTCCTAGGAGGTCTGC

>Desmodus_rotundus

ATAAGGT---CTTCACAAGTTTTGAATGTGTCAGTTTAAG---AAATTCAGGGCTG------------------------

--------------------------------------------------------------------------------

---------------------------------------------------GGTGAGGTGTA---------------CAT

CTCTA-TCTTGCCCCTGCTACTGCAGGTCTGGAAATAGTCCTGGGAGTCCTAC

>Myotis_brandtii

ATAAGATCCTCTACACACGTTTTGAATGTGACAGTTTAAG---AAATTCAGGGCTG------------------------

--------------------------------------------------------------------------------

---------------------------------------------------GATGAGGTGTG---------------TAT

CTTGG-TCTTGCCTCTGCCATTGCAGGTCTGGAAACAGCCCTGAGAGTCCTGC

>Equus_caballus

ATAAGATCGGCTCCACCAGTTTTGAATGCTGCAATTTAAG---AAATTCAGAGCTG------------------------

--------------------------------------------------------------------------------

---------------------------------------------------GGTGAGGTGCTGTG------------TAT

CTTGG-T-TTGCCTCTGCCAGTGCCGCCCTGGAAACAGTCTTGGGAATCCTGC

>Bos_taurus

ATAAGTTTCTCTCCACCAAGGTTGAAGGCCACAGTTCAAG---AAATTCAAGGCTA------------------------

--------------------------------------------------------------------------------

---------------------------------------------------ACTGAGGTGTG-TGTCTTCCTCTTGGTGT

CTTGG-TCTTCCCTCTGCTAGTGCTGTTCTGGGAACAGTCCTGGGATTCCTAC

>Canis_familiaris

---------------------------------TGTGAAG---AAATTCAGGGCTG------------------------

--------------------------------------------------------------------------------

---------------------------------------------------GGTGAGATGGTGTG------------TAT

CTTGG-TCTTGCCTTTGCCAGTGCCATTCTGGAAGTAGTTCTGGGAATCCAAT

**Marker Espe22_L**

>L1MA9_3end

--------------------------------------------------------AGATCTTAAGTGTTCTCACCACAC

ACAAA--AAAATGGTAACTATGTGAGGTGATGGATATGTTAATTAGCTTGATTGTGGTAATCATTTCACAATGTATACGT

ATATCAAAACATCACGTTGTACACCTTAAATATATACAATTTTTATTTGTCAATTATACCTCAATAAAGCTGGAAAAA--

--------------------------------------------------------------------------------

--------------------------------------------------------------------------------

-------------------

>Eonycteris_spelaea

GTTCCCTCTGTATGGAATGGGCTTTCTCTGCCC---AACATTGTTCATACTCC---AGATCTCGAGTATTCTTGGCACGG

GGAAG--AAAAAAGTAACCATGTGAGGTGACAGCTATGTTAACTAGCTTGATTGTAATAATCACTTCATAATAT------

ATGTCAAAACATCACATTGTACACTTTAAATATACACAATCCTATTT--------------AAATAAAGCTGGGGAAAAA

---ATAAAAAATAAA---AACATTGCTCATACTTC---AACCCTTGGATAAAGGGAAGTTT-------------------

--TCCCCAACCCCTTCCCAAC-----------------------------------------------------------

---------ATC--CACCA

>Pteropus_vampyrus

GTTCCCTCTACATGGAATGGGCTTTCTCTGCCC---AATATTCCTCATACTCC---AGATCTTGAGTATTTTTAGCACGG

GGAAGAAAAAAAAGTAACCATGTGAGGTGACAGCTATGTTAATGAGCTTGATCGTAATAATAATTTCACAATAT------

ATGTCAAAACATCACATTGTACACTTTAAATATACACAATCCTACTT--------------AAATAAAGCTGGAAAAAAA

T--AAAAAATAAAAA---AACATTGCTCATACTTC---AATCCTTGGATAAACAAAGGGTT-------------------

--TCCCCAACTCCTTCCTAAC-----------------------------------------------------------

---------ATT--CACTG

>Hipposideros_armiger

GTTCCCTCTCTACAGAATAGGC-TTCTCTGTCC---AACAGTGTTCATAGCCC---AGATCTTGTGTATTCTTACCACAG

GGA-GA-AAAAAAGTAACTACGTGACGTGATGGTTACATTAATTAGTTT----GTACTAATCATTTTACAATGTATATGC

ATGCCAAAACATCACGCCGTACACCCTAAATATACACA----TACTT--------------AAATAACGTTGGAAAAAAA

TTTTTTTAATTTAAA---AACATTGCTCATACTCC---AACCCTTGGCTAAGTGGAGGTCT-------------------

--TCCCCAACCCCTCCCTATC-----------------------------------------------------------

---------CTC--CACCA

>Megaderma_lyra

GTTCTCTGTGTGTGGAATAGACTTTTTCT--CC---AATAGTGCTCATACTCC---AGATCCTGAGTATTTTTCCCACGT

GGAAGA-AAAAAGGTAACCATGTGAGTTGATGGCTATGTTAACCAGCTTCATTGTGCTAATCATTTCACAATGTATATGT

ATGTTGAAACATCATGTTGTACAGCTTAAATATACACAATCATACTT-------------AAAATAAAAATGGAAATTGT

T--TTTTAATTTAAA---AATACTACTCATATTCC---AACACTTGGCTATATATATGATTATATATATAATCATACCTT

GGTACTCAATTGTTTTGAAACTCATCAATTTGGTACTCGATACATTTTGACACAAAAATTTTGCCCTGGTACTGGTCATT

TGTTTGGTGCTCCTCACAC

>Desmodus_rotundus

----CCTCTGTATGGAAAGGGCTTTCTCAGCCC---AACATGGCTCATACGCC---------------------------

--------------------------------------------------------------------------------

--------------------------------------------------------------------------------

--------------------------------------AACCCCTCCCTAAGTGCAGGCCC-------------------

--TCCCCAAC----------------------------------------------------------------------

--------------CTCCA

>Myotis_brandtii

GTTCCCTCTGTATCAAAAGGGCTTTCTCTGCTC---AACATTGCTCATACACC---------------------------

--------------------------------------------------------------------------------

--------------------------------------------------------------------------------

--------------------------------------AATGTTTCTCTACATGGAGGTCT-------------------

--TCCCCAACCCCT-CCCAAC-----------------------------------------------------------

---------TTC--TACCA

>Equus_caballus

ATTCCCTCTGTATGGAATGGGC--TCTCTGCTC---AACATTGCTCAAACTCC---------------------------

--------------------------------------------------------------------------------

--------------------------------------------------------------------------------

--------------------------------------AACCCTTGGCCAAACAGAAGCCT-------------------

--TCCCCAATCCCTCCGCAAC-----------------------------------------------------------

---------CTCTACCCCA

>Sus_scrofa

GATTTCTCCGTAT-GAATGGGCTTTTTCTGCCC---ACCATTGCTCATGCTCC---------------------------

--------------------------------------------------------------------------------

--------------------------------------------------------------------------------

--------------------------------------AACCCCTGGCCTTCCTCAATCCC-------------------

--TTCCCAACCTCACCAAAAA-----------------------------------------------------------

---------CTT--ATAGA

>Canis_familiaris

GCTCCCCCTGCATGGAATAGGCACTCCCTGGCC---AACATTGCTCATACTCC---------------------------

--------------------------------------------------------------------------------

--------------------------------------------------------------------------------

--------------------------------------AACCCTTGGCCAAGTAGAGGCCT-------------------

-----CCAACCCTTCCCCAAC-----------------------------------------------------------

---------CTC--CGCCA

**Marker Espe25_L**

>HAL1-3_ML

-------------------------------------------------------------------------ATACAAT

GGAATATGACTCAGCCATAAAAAAGAATGAAATCTTGCCATCTGCAACATGGATGGACCTAGAGGGTATTGTGCTGAGTG

AAATAAGTCAGACAGAGAAAGACAAATGCCATATGATTTCACTTATA-TGTGGAATCTAAAAAACAAAATAAATAAAC--

---AAACYAARCAAGAACAGGAAACAGACTCATAGATACAGAGAATATTTTGACGGTTGCCAGATGGGAGGGGWGTTGAT

GGGGATGGGTGAAAAAGGTGAAGGGA-TTAAGAAGTACAAATTGGTAGTTACAGAATA-GTCATGGGGATGTAAAGTACA

GCATAGGGAATATAGTCAATAATATTGTAATAACTATGTATGGTGTCAGATGGGTACTAGATTTATTGGGGTGATCACTT

YRTAAGTTATATAAATGTCTAATCACTGGGTTGTACACCTGAAACTAATATAATATTGTATGTCAACTGTAATTGAAAAA

TAAA----------------------------------------------------------------------------

------

>Eonycteris_spelaea

TAGAGAATGTAACTTCTTTCTCAAATGCCC----ATAGAATA----------TTGACAGTCATT---ATGGTGATACAAT

GGAACATTACTCAGCCATAAAAAAGAATGAAATCTTGCCATTTGTGAAGTAGTTAGACCTAGAAAGGATTATGTTAAGTG

AAATAAGTCTGA-AGAGAAAGACAAATACTTCATGATCTCACTTATA-TATGGAGTCTAAAAAACAAAACAAATGAAC--

---AAACAAAACAA-AACAGA-AACAAACTCAT--ATACAGAGAATACATTGACAGTTTCCAGGGGAGAGAAGAGTC-AG

GGGAGAGAT--AAAAGGG-GAAGGGAATT---AAGTACAGATTTCCAATTATAAAAGAAATCATGGGGATGTAGCATATA

ACATAGAGAATAGAGTCAGGAACATCGTAATAACTATGTATGGTGACATATGGTTACTAGATTTATTGTGGTTATCACTT

TGGAAGGTACATAAATGTTGTACACCTG------------------AAACTGATATTGTATGTCAATTATAATT--AAAA

TAAACTT------AAAAAATATTAATGGTCATT---GACTATTGAGAATGTTGCAGAATATGATCAATAAAATAGGTCTG

ACTGGT

>Pteropus_vampyrus

TAGAGAATATAACTTCTTTCCCAAATGCCC----ATAGAATA----------TCGACAGTCATT---ATGGTAATACAAT

GGATCATTACTCAGCCATAAAAAAGAATGAAATCTTGCCATTTGTGAAATGGATAGACCTAGAAAGTATTATGTTAAGTG

AAATAAGTCTGACAGAGAAAGACAAATACTTGATGATCTCACTTATA-TGTGGAGTCTAAAAAACAAAACAAATGAACAA

ACAAAACAAAACAA-AACAGA-AACAAACTCAT--ATACAGAGAATACATTGACAGTTTCCAGAGGAGAGAAGAGTC-AG

GGGAGAGATGGAAAAGGG-GAAGGGAATT---AAGTACAGATTTCCAATTATAAAACAAATCATGGGGATGTAGCATATA

ACATAGGGAATAGAGTCAAGAACATAGTAATAACTATGTATGGTGACATATGGTTACTAGATTTATTGTGGTTATCGCTT

TGGAAGGTATATAAATGTTGTACACCTG------------------AAACTGATACTGTATGTCAAATATAATT--AAAA

TAAACTT------AAAAAATATTAACAGTCATT---GACTATTGAGAAGGTTGTAGAATATGATCAATAAAATAGGTCTG

ACCGGT

>Hipposideros_armiger

TAGAGAATTTGGCTTC-TTTTCAAATGCCC----ATAGGAAA----------TTGACAGTCATT---ATGGTAATACAAT

GGAACATTGCTCAGCCATAAAAAAGAATGAAATCTTGCCATTTGAGACATAGATAAACCTAGAAAGTATTATGTTAAGTG

AAATAAGTTAGACAGAGGAAGATAAATACTATATGATTTCACTTATA-TGTAGAATCTAAAAAACAAGACAAACTAAC--

--------AAACAA-ATCAGA-AACAAATTCATAGATACAGACAACACATTCATAGTTGTCAAGGGGGAGGAGAGTT-GG

GGGAGGGGCAAAGAAGGG-GAAGGGGATTAAGAAGTACAAATATCCAGTTATAAAATAAAGCATGTGGATGTAGCATATA

GCATAGGGAATAGAGTCAATAACATCAAAATAAT--GTTATGGTGACAGATGGTTGCTAGACTTATTG-AGTGATCACTT

TGGAAGGTATATAAATGTTGAATCACTGTCCTGTACATCTGAAACTATTTTAATATTGTATGTCAATTATAATT-AAAAA

TAAATTTAAA---AAAGAATATTGACAGTCATT---GACTATTGAGAAGGCTGTAGAATATGATCAATAAAGTAGGCCTG

ACTGGT

>Craseonycteris_thonglongyai

TAGAGAATACACCTTTTTTTTCAAATGCTT----ATAGAAAA----------TTGACAGTCATT---ATGATAATGCAAT

GGAAGACTACTAGGCCA-AAAAAAGAATGAAATCTTGTCATTTGAGACATGGACAGACCTAAAGAATATTACACTAAGTG

AAATAAGTAAGACAGAGAAAGACAAATACTGTATGGTTTTACTTATAATGTGCAATCTAAAACATAAGACAAATGAAC--

---AAACAAAACAA-AAAAGG-AACAAACTCATAGATATAGAGAACACATTGACCATTGTCAGAAGAGAAGAAAGTG-GG

GGGAAAGGCAGAAAAGAG-GAAGAGTATTAAAAATAACAAATATCCAATTATAAAATAAATCCTGAGGATGTAGCAAATA

GCTTGGGGAATAGAATAAATAACATCATACTAACTACGTACGGTGACAGATAGTTACTAGACTTAATGTGGTG-CCGCTT

TGGAAGGTACATAAATGTTGGATCACTATGTTGTGCACCTGAAACTAATATAATACTATATGGCAGTTATAATT-AAAAA

CAAATTTAAA---AAAGAATATTGACAGTCATT---GACTATTGAGAAAACTATAGAACATGATCAATATGGTAAATCTG

ACTGCT

>Desmodus_rotundus

CAGAGAATACACCT---TTCTCAAATGCCC----AGGGAATACTA-------CTGACAGTCATT----------------

--------------------------------------------------------------------------------

--------------------------------------------------------------------------------

--------------------------------------------------------------------------------

--------------------------------------------------------------------------------

--------------------------------------------------------------------------------

--------------------------------------------------------------------------------

------------------------------------GACTATTGAAAAGGCTGTAAAATGTCATCAATAAGGCACGTCTG

ACTGAT

>Noctilio_leporinus

TGGAAAATACACCT---TTTTCAAATGCCC----ATGGAATACTA-------CTGACAGTCATT----------------

--------------------------------------------------------------------------------

--------------------------------------------------------------------------------

--------------------------------------------------------------------------------

--------------------------------------------------------------------------------

--------------------------------------------------------------------------------

--------------------------------------------------------------------------------

------------------------------------GACTACTGTAAAGGCTATAAAAGATCATCAATAAGGTAGGTCTG

AGTAAT

>Equus_caballus

TAGAGAACACGCCTTCTTTTTCAAAT--------GTAGAATA----------TTGACAGTCATT----------------

--------------------------------------------------------------------------------

--------------------------------------------------------------------------------

--------------------------------------------------------------------------------

--------------------------------------------------------------------------------

--------------------------------------------------------------------------------

--------------------------------------------------------------------------------

------------------------------------GACTATTGAGAAGGCTATAGAACAGGATCCATAAGGTAGGCCTG

ACTGAT

>Vicugna_pacos

TA-AGACCACAC---CTTTTTCAAATGCCC----ACAGAATA-----------TGAGAGTCATT----------------

--------------------------------------------------------------------------------

--------------------------------------------------------------------------------

--------------------------------------------------------------------------------

--------------------------------------------------------------------------------

--------------------------------------------------------------------------------

--------------------------------------------------------------------------------

------------------------------------GATTACCTTGAAGGTTATAAAATATGATCAATAAAGTAGGTCTG

GTTGAT

>Canis_familiaris

TAGAGAATATACCTTCCTTTTTAAATACCCA---ATAGAATATTAACAGTCTTTGACAGTCATT----------------

--------------------------------------------------------------------------------

--------------------------------------------------------------------------------

--------------------------------------------------------------------------------

--------------------------------------------------------------------------------

--------------------------------------------------------------------------------

--------------------------------------------------------------------------------

------------------------------------GACTAT------------------GTATCGGACAGATAGGTCTG

ACAGAT

**Marker Espe26_L**

>L1-4_PVa

---------------------------------------------------------GTATTATGCTAAGTGAAATAAGT

CAGACAGA----------------------------------------------------------------GAAAGACA

AATACCATATGATTTCACTTATATGTGGAATCTAAAGAACAAAATAAATGAACAAAC-AAAATGAAAACAGACTCA----

----------------------------------------------------------------------

>Eonycteris_spelaea

AAATTATTTCTGTAAATTTCAGCTGACTGGCATCTTT---GAGAAGTCTTACA---TGTATTAAACTAAGTGAAATAAGT

CAGA--------------------------------------------------------------------AAAAGATA

AACACCAT-TGATTTCACTTAAATGTGAAATCTAAAA----AAATAAACCAACAAAC-GAAACAGAAACAAACTTA---A

A--AAAAAGTCTCACA---GGATAACTGTGAATGTGGCCTAATTCTATTTATTAAAAA-GATGATTCTAC

>Pteropus_vampyrus

AAATTATTTCTGTCAATTTCAGCTAACTGGTATCTTT---AAGAAGTGTTACA---TGTATTAAACTAAGTGAAATAAGT

CAGA--------------------------------------------------------------------AAAAGACA

AACATCATATGATTTCACTTATATGTGGAATCTAAAAAACAAAATAAACCAACAAAC-AAAACAGAAACAAACTTA---A

AAGAAAAAGTCTCACA---GGATAACTGTGAATGTGGCCTAATTCTATTTATTAAAAA-GATGATTCTAT

>Hipposideros_armiger

AAATTATTTCTGTCAAACCCAGCTAATTGGTATCTTT---AAGAAGTCCCACA---TGTATTATGCTAAGTGGAATAGGT

CAGATAGA----------------------------------------------------------------GAAAGACA

AATACTGTATGATTTCACTTATATGTGGAATCTAAAATACAAAATAAATGAACAAGC-AAAACAGAAATGATCTTA---A

A--AAAAAGTCCCACA---GCATAACTGTGAATGCAGCTTAATTCCATTTTTAAAAAAAGATGATTCTAT

>Megaderma_lyra

AAAT-ATTTCTTTCAAATTCAGCTAATAGGTATTCTT---AAGAAGTCCCACA---TGTATTATGCTAAGTAAAATAAGT

CAGACACCGAAAGACAAATACCATATGATTCCACTTACATGTGGAAATGCTAAGTAAAATAAGTCAGACACCGAAAGACA

AATACCATATGATTCCACTTACATGTGGAATCAAAAA------ATAAATGAACAAACAAAAACAGAAACAAAC-TA---A

AAAAAAAAGTCCCACA---GCCTAACTGTGAATGCAGCTTAATTTTATTTTT--AAAA-GATGGTTCTAT

>Desmodus_rotundus

AAATTATTTTTGTCAAACCCAACTAATTGGTATATTT---AAGAAGTCCGATA---------------------------

--------------------------------------------------------------------------------

--------------------------------------------------------------------------------

-------------------GGCTTACTGAGAATGCATCCTAATTCTATTTTTTAAAAA-GATGACTCTAT

>Miniopterus_natalensis

AAGTTATTTCTGTCAAGTCCAACTAATTGATATCTTT---AAGAAATCCCACA---------------------------

--------------------------------------------------------------------------------

--------------------------------------------------------------------------------

-------------------GGATTACTGTGAATGTAGCCTAATTCTATTTTTAAAAA--GATAATTTTAT

>Equus_caballus

AAATTATTTCTGTGAAATCCAGCTAATTGCTATCTTT---AAGAAGTCCCATA---------------------------

--------------------------------------------------------------------------------

--------------------------------------------------------------------------------

-------------------GGATAACTGTGAACACAGCCTGATTCTATTTTTTTAAAA-GATGATTCTAT

>Bos_taurus

AAAC--ATTCTGTGAAACTCAGCTAATTGGTGTCTTT---AAGACATCCCACA---------------------------

--------------------------------------------------------------------------------

--------------------------------------------------------------------------------

-------------------GCATAACTGTGAATGTAGTCTGACTCTATTTTTCAAAAA-GATGATTCTAT

>Canis_familiaris

AAATGATTTCTGTCAAACCTATATTATTGATATGTTT---AAGAAGTACCACA---------------------------

--------------------------------------------------------------------------------

--------------------------------------------------------------------------------

-------------------GGATAACTA-AAATGTAGCCTGAGTCTAT----------------------

**Marker Harm4_L**

>L1-3_PVa

-----------------------------------------------------------------------------AAG

GAGATTTGACTTTGGGTGGT----GAACACACAATGCAATATACATATGATGTATTATTGAATTGTACACTTGAAACCTA

TATAATTTTATTAACCAATGTCA-CCCCAATAAATTTAATTTAAAA--AA------------------------------

------------------------------------------------

>Eonycteris_spelaea

CCAGGCTTTCCTAC---CTC-ACCACTCCC-CAAAGTTT---------AAGACTT---AGAACGTCACAAAACA---AAG

GAATCTAGACTTTAAGTGGT----GAACACACAATTGACTATGCAGCG-----GTCATAGCATGGTACCCTGAAAATGTA

T---ATTTTATTAACCAGCGTCACCCCCAACATATTCCATTTTTAA--AAA---AGAATATCCCCAAA---TGA----AT

GAAATTTAAAGTCGGCGGATGAGGAAAATGGAGCATTTC---TCCCTT

>Pteropus_vampyrus

CCAGGCTTTCCTAC---CTC-CCCACCCCC-AAAAATGT---------AAGACTT---ACAATGTCACAAAACA---AAG

GAATCTAGACTTCAAGTGGTGAACGAACACACAATTGAGTATGCAGAT-----ATCATAGAATGGTACACTGAAAATTTA

T---ATTTTGTTAACCAACGTCA-CCCCAACATATTCAATTTTTAA--AAA---AGAATATCACAAAA----GA----AT

GAAATTTAAAGTCAGCGAATGAGGAAAATGGAGCATTTC---TCCCTT

>Hipposideros_armiger

CCA------CCTGCT----CAAAAAAAAAAAAAAAAATT---------AAGACTT---AGACTATCACAAAA-----AAG

GAAGCTAGCCTGAGGGTGGT----GAGCACACAACTACGTATACAGATGTCGTATGATAAAGTTGTACACTTGAAATTTG

TATAACGTTATTGACCAATGTCA-CCCCAATACATTTCATTAAAAA--AAA---AGAATATCACAAAA---TGA----AT

GAAATTTAAACTCAGTGGATGAGGAAAATGAGGCATTTC---TTCCTT

>Megaderma_lyra

CCAGCCTTTCCTACACCCTCCTCCACCCCCCAAAAAATT------TAAGAGACTT---AGAATATCAGGAAA-----AAG

GAAACTAGATTTTGGGTGAT----GAGCACACAGTTGCCTATACAGAT---GGGTTACAAAGTTGTGCACCTGAAATTTA

TGTGATGTTATTGACCAGTGTTA-CCCCAACACATTTAATTAAAAAACAAA---AGAACATCCCAAAA---TAA----AT

GAAATTTAAAACACATGGATGAGGAAAATGGCACATTTC---TTCCTG

>Desmodus_rotundus

CCAGACTTCCCTGCCCTCCCCCGACCACAAAAAAAATTT---------AAGACAT---AGAATGTCACAAAA--------

--------------------------------------------------------------------------------

-----------------------------------------------------------------------TGA----AT

AAAATTTAAAGCAAGTAGATGAGGAAAACGGGGCATTTC---TTCCTT

>Myotis_brandtii

CCAGACTCTCCTGCCCCCCC--------AAAAAAAATTTTTTTTAAAGAAGACAT---GGACTATCACAAAA--------

--------------------------------------------------------------------------------

-----------------------------------------------------------------------TAA----AT

GAAATTTAAAATACGTGGATGAGGAAAACGGGGCATTTC---TTCCTT

>Equus_caballus

CTAGGCTTTCCCTTCC-----------AAAAACAAATTT---------AAGACTG---ACAATATTTCAAAA--------

--------------------------------------------------------------------------------

-----------------------------------------------------------------------TGA----AT

GCAATTTAAAATAAGTGAATGAGGAAAATGGGGCATTTC----CTCTT

>Bos_taurus

TTAAGCTTT--------------AAAAAAAAAAACAACT------AAGAAGACTT---AGAATATCTCAAAA--------

--------------------------------------------------------------------------------

-----------------------------------------------------------------------TAA----AT

GAAATTTAAAATAATTGGATGAGAAAAATGGGGCATTTCCAACCCCTC

>Canis_familiaris

CCAGGTTTTCCT-------CCCCCAGGAAAAAAAATGTT------AAGAAGGCTT---AGAATATCACAAAAG-------

--------------------------------------------------------------------------------

-----------------------------------------------------------------------TGATATCAT

GAAATTTAAAGTAACTGGTTGAGGAAAAGGCGACATTTG---CTCCTT

**Marker Harm5_L**

>L1-3_PVa

--------------------------------------------------------TACAGCCACTATGGAAAACAGTAT

GGAGGTTCCTCAAAAAATTAAGAATAGAATTACCATATGACCCAGCAATCCCTCTTCTGGGTATCTACCCCAA-----AA

ATTTGAAAACATTTATCCGTAAA-GATATATGCACCCCAATGTTCATTGCAGCATTATTCATGGTGGCCAAGACATGGAA

ACAACCGAAGTGTCCTTCGATAGATGATTGGATAAAGAAGATGTGGTACATA----------------------------

--------------------------------------------------------------------------------

--------------------------------------------------------------------------------

--------------------------------------------------------------------------------

--------------------------------------------------------------------------------

--------------------------------------------------------------------------------

--------------------------------TATACAATGGAATATTACTCAGCCATAAGAAAAGATGAAATACTGCCA

TTTGTGA-CAACATGGATGGATCTTGAGATTATCATGCTAAGCGAAATAAGTCAGACAGAAAAAGTTGAGAACCATATGA

TTTCACTCATATGTGGGATATAAAACTGAAAGCAACAAACAAACAAGACAAACAAACAAAACTCATGGACACAGACAACA

GTTTAGTGGTTACCAGAGGGAAAGGGGGGAGGGGGAGGTAGATAAGGGTAAAGGGGGTCAAATATATGGTGACGGAAGGA

GATTTGACTTTGGGTGGTGAACACACAATGCAATATACATATGATGTATTATTGAATTGTACACTTGAAACCTATATAAT

TTTATTAACCAATGTCACCCCAATAAATTTAAT-----------------------------------------------

------------------------------------------------------------

>Eonycteris_spelaea

TGGGTAAGGATAAGTTAAGGCAAAAATGTAGTGTA---AAAATGTGTACACAC---CACAGCCACTAAAAAAAACAGCAT

GACATTTCCTCAAA-AATTAAGAATAGAACTACCAGATGACCCAGAAATTCCTCTTTTGTTTATTTGAA---------AT

ATTTGAAAACATTTGTTTGTAAA-GTTATATGTATCCTTATTTTCATTACAGCATTATACATGGTACCCAAGATATGGAA

ACACCTTAAGTGTCTTTCAATGGATGATTGGATACAGA---TGTGGTACATA----------------------------

--------------------------------------------------------------------------------

--------------------------------------------------------------------------------

--------------------------------------------------------------------------------

--------------------------------------------------------------------------------

--------------------------------------------------------------------------------

--------------------------------TAGACAATGGAATACTTCTCAGCCATAAGAAAGGATAAAATATTGTCA

TTTGCGAACAACATGGTTGGATCTTGAGAGTATCATGTTAAATGAAAT--GTCAGATGAAAAAGGGCAAGAACCAGATGA

TTTTGCTAGTATGT-GGATATAAAACAGAAAGCAACAAATGAACAAACT----------AACTCATAGACACAGATAACA

GAAGGGTGATTACCAAAGGGGAAGGGAGTGGGGGGATGATGAAGAGG-TAGAGGGGGTCAGATATATGGTGATGAAGAAA

AACTAGACTTTGGGTGGTGAACACGCAATGTGCTATACAGATGATACATCATAGAACTGTACACTTGAAAC--ATATAAT

GTTATTAACCAATATCACCCTGATAAATTTAATAATACAAAAA----TAGATGTGTACAAGC---TGCTTTGGAAAC---

--------------ATATATTGCTTAGGAGAATTTGAGAAGGTTT--------CATAGAG

>Pteropus_vampyrus

TGGGTAAAGATAAGCCAAGGCAAAAATGTAGTTTA---AAGACGTGTACACGC---TACAGCCACTAAGGAAAACAGTGT

GACGTTTCCTAAAAGAATTAAGAATAGAGCTACCATATGACCCAGGAATTCCTCTTTTGTGTATTTGAA---------AT

ATTTGAAAACATTTATTTGTAAA-GATATATGTATCCTTATGTTCATTGCAGCATTATACATGGTACCCAAGATATGGAA

ACAACTTAAGTGTCTTTCAATGAATGTTCGGATACAGA---TGTGGTACATA----------------------------

--------------------------------------------------------------------------------

--------------------------------------------------------------------------------

--------------------------------------------------------------------------------

--------------------------------------------------------------------------------

--------------------------------------------------------------------------------

--------------------------------TATACAATGGAATACTTCTCAGCCGTAAGAAAGGATAAAACATTGCCA

TTTGCGA-CAACATGGTTGGATCTTGAGAGTATCATGTTAAATGAAAT--GTCAGATGAAAAAGGGCAAGAACCAGATGA

TTTCACTCATATGT-GGATATAAAACAGAAAGCAACAAATGAACAAACT----------AACTCACGGACACAGACAACA

GAAGGGTGATTACCAGAGGGGAAGGGAGTGGGGGGATGATGAAGAGGGTAGAGGGGGTCAAATATTTGGTGACGAAGAAA

-ACTAGACTTTGGGTGGTAAACACGCAATGAGCTATATAGATGATACATTATAGAATTGTACACTTGAAAC--ATATAAT

GTTATTAACCAATATCATCCCGACAAATTTAATAAGACAAAAA----TAGATGTGTATAAGC---TGCTTTGGAAAC---

--------------ATATATTGCTTAGGAGAATTTGAGAAGGTTT--------CATAGAG

>Hipposideros_armiger

TGGGTAAAGATAGGCCAAGGTAAAAATGT--------------GTATGCAAGC---TATAGTCACTATGAAACACAGTAT

GGAGTTTCCTCAAAAAATTAAACATAGAACTACCCTATGAGGCTGCAATC-------TGGGTATCTACCCCCCCCCCCAA

ATTTGAAAACATTTGTTTGTAAA-GATGCATGTATCCCTATGTTCATTGCAGCATTATAGAACGTAGCCAAGACATGGAA

ACAATCTAAGTGTCCTTCAGTGGATGATCAGACAAAGAAGATGTGGTACATA----------------------------

--------------------------------------------------------------------------------

--------------------------------------------------------------------------------

--------------------------------------------------------------------------------

--------------------------------------------------------------------------------

--------------------------------------------------------------------------------

--------------------------------TACACAATGAAATACTACTCAGACATAAGAAAGGATGACATGTTGCCA

TTTGTGA-CAACATGGATGGATCTTGAGAGTATCATGCTAAGCGAAATAAGTCAGATGGAAAAGGACAAGAGCTATATGA

TTTCACTAATATGTGGGATATAAAACAGAAAACAACAAAAAACCTAAAA----------AGCTCCTAGACACAGACAACA

GAAGGGTGGTTACCGAGGGGAAAGGG--CTGGGGGAGGACAAAGAGGGTAAAGGGGGTCACATACATGGTGATGGAGGGG

GACTAGACTTTGGGTGATAAGCACACAATGCAGTATACAGATGATATATTATAGAATTTTACACTTGAAACTTGTATAAT

GTTATTAACAAATGCTGCCCCAATAAATTTAATAATACAAAAAG---TAGATGTGTTCAAGC---TGCTTTAGAAAAACT

-GATACAGCA--ACAGATACTGCTTAGGGAAATTTGGCAAGGTTT--------CATAGAG

>Megaderma_lyra

TGGATAAGGATAGGCCAAGGCAAAAAGGTAGTGAA---AAGATGTGTACAAGC---TGCAGCCACTATGGAAAATAGTAG

AAAATTTCCTTACA---TTATAAATAGAGCTACCATATGCCCCAGCAATCTGTCTTCTGGGTATCTACCCCCA-----AA

ATTTGAAAATATTTATTAGTAAAAGATATATATACCCCTATGTTTACTGCAGCATTATGCCAAGTAGCCAAGACAAGGAA

ACAACTTAAGAGTCCTGCAATGGATGGTCAGATAAAGAATATATGGTACATACGGTGTGTCCCAAAAAATTGTATACACA

CTTTAACAGCTGATAACTCACATAAGTTTCTCTCCTTTTCAGGTTTAACTGATTTGAAATAAAGGATAAAGTCTGGAGAA

TGTGGAATACCCTCTGCGTTCACCAGACCTCATGCCATTAGACTTTTTATGGAAATACATAAAAGATAAAGTTTACAGTA

CAAAACTGGCAACAATTGGTTAATTAAAGGCAGCCATTGAATCAGAATGCACACAAATACCAAGTGCAATGATTCTTGAT

GTTTGCGATGCCAACGCTTCGTGTTGCCAGCAGTGCTTGGACCAGACCGTCATCATTTTGAAAACAGGCATTGCCAAAAG

AATTATTCAGTTCTGTAGATTCTTTTAAATTTTGAAAATAAACTGCATGTTAATAAACACTGACTTTATAATCATTCAAA

GTCTGTTTACATTTTGGGGGGGACACCCTGTATATACAATGGAATATTTCTCAGCCATAAGAAATGATGAAATACTGCCA

TTTGTGA-CAACATGGACAGATCTTGAGATCATCATGCTAAGTGAAGTAAGTCATATGGAAAAGGACAAGAACCATATGA

TTTCACTGATATGTAGGATATAAAACAGAAAGCAACAAACAAACCAAACA---------AACTAATAGATGCAGACAACA

GCAGCGTGACACCCAAAGGGGAAGGGAGTGGGAGGAGGATGGGGG-----------------------------------

-----GACTTTGGGTGATCAGCACACAATGCAATACACAGATGATGTGTTACAGAATTGTACACTTGAAACGTGTATACC

GTTATTAACCAATGTCACCCCAATACATTTAATAATACAAAAC----AGGATGTGTACAAGC---TGCTTTGGAAACACT

-GAGAGGGCACAACAGATACTGCTTAGGGACATCTGGGAAGGTTT--------CATAGAG

>Desmodus_rotundus

TGGGTAAGGATAGGCCAGGGCAAACGTGTAGTGTA---AAGATGTATGCAAGC---------------------------

--------------------------------------------------------------------------------

--------------------------------------------------------------------------------

--------------------------------------------------------------------------------

--------------------------------------------------------------------------------

--------------------------------------------------------------------------------

--------------------------------------------------------------------------------

--------------------------------------------------------------------------------

--------------------------------------------------------------------------------

--------------------------------------------------------------------------------

--------------------------------------------------------------------------------

--------------------------------------------------------------------------------

--------------------------------------------------------------------------------

--------------------------------------------------------------------------------

-----------------------------------------------------------------TGCTTTGGAAACACA

-GAGAGAGCA----AGATACTACTTAGGGGAATTTGGAAAAGCTACATAGTTATGTAGAG

>Myotis_brandtii

TGGGTAAGAATAGGCCAAGGCAAAAAAGCAGTCTA---AAGATGTGTACAAGC---------------------------

--------------------------------------------------------------------------------

--------------------------------------------------------------------------------

--------------------------------------------------------------------------------

--------------------------------------------------------------------------------

--------------------------------------------------------------------------------

--------------------------------------------------------------------------------

--------------------------------------------------------------------------------

--------------------------------------------------------------------------------

--------------------------------------------------------------------------------

--------------------------------------------------------------------------------

--------------------------------------------------------------------------------

--------------------------------------------------------------------------------

--------------------------------------------------------------------------------

-----------------------------------------------------------------TGCTTTGGAAACA--

-GAGAGAGCA--GCAGATACTGCTTAGGGGAATTTGGGAAGGTT---------CATAGAA

>Equus_caballus

TGGATGAGGACCCGCCAAGGTGAAAATATAGTGTA---AATATGTATTCAAGC---------------------------

--------------------------------------------------------------------------------

--------------------------------------------------------------------------------

--------------------------------------------------------------------------------

--------------------------------------------------------------------------------

--------------------------------------------------------------------------------

--------------------------------------------------------------------------------

--------------------------------------------------------------------------------

--------------------------------------------------------------------------------

--------------------------------------------------------------------------------

--------------------------------------------------------------------------------

--------------------------------------------------------------------------------

--------------------------------------------------------------------------------

--------------------------------------------------------------------------------

-----------------------------------------------------------------TGCTTTGGAAACACT

-GAGAGGGAGCAACAGACACTGCTTAGGGGT-TTTGGGAAGATCT--------CACAGGG

>Bos_taurus

TAGGTGAGGACACACCAAGATGAAAATAC-GTGCA---AAGAAGTGCACAGAC---------------------------

--------------------------------------------------------------------------------

--------------------------------------------------------------------------------

--------------------------------------------------------------------------------

--------------------------------------------------------------------------------

--------------------------------------------------------------------------------

--------------------------------------------------------------------------------

--------------------------------------------------------------------------------

--------------------------------------------------------------------------------

--------------------------------------------------------------------------------

--------------------------------------------------------------------------------

--------------------------------------------------------------------------------

--------------------------------------------------------------------------------

--------------------------------------------------------------------------------

-----------------------------------------------------------------TGCTTTGGAAACACT

TGAGAAGAGG----TGATACTGCGTAGAGGGATTTGGGAAGGTTT--------CATGGAG

>Manis_pentadactyla

TCGGTAAAGACAGATCAAGGCACAAACACCCTGGA---AAGAAGTGTTCAGGC---------------------------

--------------------------------------------------------------------------------

--------------------------------------------------------------------------------

--------------------------------------------------------------------------------

--------------------------------------------------------------------------------

--------------------------------------------------------------------------------

--------------------------------------------------------------------------------

--------------------------------------------------------------------------------

--------------------------------------------------------------------------------

--------------------------------------------------------------------------------

--------------------------------------------------------------------------------

--------------------------------------------------------------------------------

--------------------------------------------------------------------------------

--------------------------------------------------------------------------------

-----------------------------------------------------------------TGCTTTGGTAATACT

-GAGAGGAAGTAGCAGACACT------GGGAATTTGGGAAGGATT--------CATAGAG

**Marker Harm6_L**

>L1-3_PVa

---------------------------------------------------------TGGTACATATATACAATGGAATA

TTACTCAGCCATAAGAAAAGATGAAATACTGCCATTTGTGACAACATGGATGGATCTTGAGATTATCATGCTAAGCGAAA

TAAGTCAGACAGAAAAAGTTGAGAACCATATGATTTCACTCATATGTGGGATATAAAACTGAAAGCAACAAACAAACAAG

---ACAA-AC----AAACAAAA-CTCATGGACACAGACAACAGTTTAG--TGGTTACCAGAGGGAAAGGGGGG--AGGGG

GAGG----------TAGATAAGGGTAAAGGGGGTCAAATATATGGTGACGGAAGGAGATTTGACTTTGGGTGGTGAACAC

ACAATGCAATATACATATG------ATGTATTATTGAATTGTACACTTGAAACCTATATAATTTTATTAACCAATGTCAC

CCCAATA---AA--------------------------------------------------------------------

>Eonycteris_spelaea

TAACCACATCCCAGCCAGCAGGAAGGACAAAGGAATCCATT----AAAAATACA---TGGGACATATATACAATG-AATA

CTACTCAGCCATAAGAAAAGTTGAAATATCGCCTTTTCTAACTTAGTGGAT----CTTGACAATGTCATGCTAAGAGAAA

TAAGTGAGACAGAAGAAGCCAAGAACCATATGATTTCACTCATATGTGGGATATAATACTGAAAGCAACAAACAAACAAA

CAAGCAAGACAAACAAACAAAAACTCATAGACGCAGACAACAGTATAG--TAGTTATCAGAAGGAAATGGTAGTGGTGGG

GGAAGGGGGT----TGAACAAGAAAAAAAGGGGTCAAATATATGATGACAAAAGAATATTTGACTTTGGGTGGCAAAAAC

ACAATGAAATATACAGATG------AAGTATTATAGAAGTATACACTTGAAACTTATACGATTTTATTAACCACTGTCAC

TGCAGTT---AAAAAAAAAAAC--CA---TTCCATGTGCAGCCTTCT-AAAACTATTTTCTACCATCTTCCTCTATAAAC

>Pteropus_vampyrus

TAACCACATTCCAGCTAGCAGGAAGGACAAAGGAATCCATT----AAAAATATA---TGGAACATATATACAATG-AATA

CTACTCAGCCATAAGGAAAGCTGAAATACCGCCATTTGCAACAACACAGGTAGATCTTGACAATGTCACGTTAAGAGAAA

TAAGTCAGACAGAAGAAGCCAAGAACCATATGATTTCATTCATATGTGGGATATAATACTGAAAGCAACAAACAAACAAA

----CAAGACAAACAAACAAAAACTCATAGACACAGACAACAGTATAGTATAGTTACCAGAGGGAAATGGTAGTGGTTGG

CGGCGGGGGGCAGATAGACAAGAATAAAAGGGGTCCAATATATGATGACAAAATAAGATTTGACTTTGGGTGGCAAAAAC

ACAATGAAATATATGGATG------ATGTATTATAGAATTATACACTTGAAACTTATAGGATTTTATTAACCAATGTCAC

TGCAATA---AAAAAAACA-----CA---TTCCATGTGCAGCCTTCT-AAAACTATTTTCTACCATCTTCCTAGATAAAC

>Hipposideros_armiger

TAGTCACATTCTAGCCAGCAGGGAGGAGAAAGGAACCCATT----AAAAAT-CA---TGGTACATATGTACAATGGAATG

CTGCTCAGCCATAAGAAAAGATGAAATAATGCCATTTGTGACAACGTGGATGGATCTTGAGAATATTGTGCTAAGTGAAA

TAAGTCAGACAGAAAATATCAAGAACCATATGATCTCACTCATATGTGGGATATGAAACTGAAAACAACAAATGAACAAA

----CAAGAC------ATAAAAACTCATAGACACAGACAACAGTATGG--TGGTCACCAGAAGGAAAGGGTGGTCGGAGG

TAAG----------TAGAAAAGGGTAAAGGGGATCAAATAGATGGTGATGGAAGAAGACTTGACTTTGGGTGGTGAGCAC

ACAATGCAATAATCAATTG------GAGTATTATAGAGTTGTACACTTGAAACTTATATAA---TATTAGCCAATGTCAC

CCCAATA---AAAAAAAAAAACTACA---TTCAATGTGCAGCCTTCT-AAAGCCATTTTCTACCATCTTACCTGATAAGC

>Megaderma_lyra

CAATCACATTCCTGCCAGCAGGGAGAAGAAAGGAACCAATT----TAAAATACA---TGGTACGTATACACAATGGAATA

CTACTCAGCCATGAGAAAAGATGAAATACTGCCATTTGCACTAACATGGATAAAACTTGAGAATGTCATGCTAAGCAAAA

TAAGTCAGACAGAAGAAGTCAAGAACCATATGATCTCACTCATATGTGGGATATAAAACTGTAAGCAACAAGTGAACAAA

----CAAGACCAACAAACAAAAACTCATGGGCACAGACAACGATATGG--TAGCTACCAGAGGGAAAGAGGGGTTGAGGG

GAGG----------TAGAAAAGGGTAAAGGGAATCAAATACATGGTAAGGGGAGGAGACTTCACTTTGGGTGGTGAACAC

ACAATGCGATATACAGATGTAGATAGTGTATTATAGAACTGTACACTTGAAACATAT-----TTTATTAGCCAATGTCAC

CTCAATG---AAAAAAAATA----CA---TTCCACGTGCAGCCTTCT-CAAAACATGTTCTACTGTCTTCCCTGATAAGC

>Desmodus_rotundus

TAAGCACCTTCCAGCCAGCAGGAAAGAGGAAAGAACCCATT---AAAAGATACA--------------------------

--------------------------------------------------------------------------------

--------------------------------------------------------------------------------

--------------------------------------------------------------------------------

--------------------------------------------------------------------------------

--------------------------------------------------------------------------------

-----------------------------TTCCATGTGCAGTCTTCCAAAAACCATCTTCTACTATCTTCCATAATAAGC

>Myotis_brandtii

AAACCACATTCCAGCCAGCAGGAAGGAGAAAGGAACCCATT----AAAGACACA--------------------------

--------------------------------------------------------------------------------

--------------------------------------------------------------------------------

--------------------------------------------------------------------------------

--------------------------------------------------------------------------------

--------------------------------------------------------------------------------

-----------------------------TTCCATGTTCAGCCTTCCAAAACCCATTTTATACCATCTTCCATGATACGC

>Equus_caballus

TAACCACATTCCAGGCAGAAGGAAGGAGAAAGGAACCCATT----AAATATACA--------------------------

--------------------------------------------------------------------------------

--------------------------------------------------------------------------------

--------------------------------------------------------------------------------

--------------------------------------------------------------------------------

--------------------------------------------------------------------------------

-----------------------------TTCCATGTGCAGCCTTTC-AAAACCGTCTTCTACCATCTTCCATGATAAGT

>Bos_taurus

TAACCTGATTCCAGTCCACAAGAAGGAGAAAGAGACCCTTT----AAAGATACA--------------------------

-------------------------------------------------------------------------------A

AGAAAACAA--TTTTATTG--TTACCAAAGGGGAAGGCAGAGGGCTGGGGGAGGAGATAAATTGGGAGTTTGGGGTTAAC

AGATACACTCTACTATATATAAAA--GAGAAAAAATAATGACCTACTGTATAGCACAGGAAACTATATTTAATACCTGAA

AGTAACCTATA--------ATGGAAAAAAATCTGAAAAGCACTTTTCAGATAATATATAACATATGTAATATTACATTAC

ATATATCATATATACATATATATAACTGAATTACTTTGCTGTATACCAGAAACCAACACAACTTTGTATATCAACTATAC

TTCAAT-----AAAGATA------CA---TTCCATGTGCCAACTTCT-GAAAACATCTTCTACCATATTCTTTGATAAGT

>L1_Art

--------------------------------------------------------------------------------

-------------------------------------------------------------------------------A

AGGAAACACAGACATTTTGGACACAGTAAGGGGAAGG-AGAGTGCGAGATGATATGAGAGAATGGGATT--------GAC

AYATACACACTACTATATTTAAAATGGATAACCAACAAGGACTTACTGTATAGCACAGGGAACTCTACTCARTGTTCTGT

GACAACCTAGAGGGGTGGGATGGGGGAGGAGGTGGGAGGGAGGTTCAAGAGGG---------------------------

--AGGGGATATATGTATACCTATGGCTGATTCATGTTGATGTATGGCAGAAACCAACACAATATTGTAAAGCAATTATCC

TTCAATT----AAAAATAAATT----------------------------------------------------------

>Canis_familiaris

TAACCACCTTCCAGCCA-CAGGAAGG-GGAAGGAGCTCAGT----AAGGATACT--------------------------

--------------------------------------------------------------------------------

--------------------------------------------------------------------------------

--------------------------------------------------------------------------------

--------------------------------------------------------------------------------

--------------------------------------------------------------------------------

-----------------------------TTCCATGTGCAGCTTTCT-AAAGACATTTTCTATAATTTACCCTGATGGAC

**Marker Harm9_L**

>L1-3_PVa

--------------------------------------------------AAAAA-TTT---GAAAACATTTATCCGTAA

AGAT--------------------ATATGCACCCCAATGTTCATTGCAGCATTATTCATGGTGGCCAAGACATGGAAACA

ACCGAAGTGTCCTTCGATAGATGATTGGATAAAGAAGATGTGGTACA----TATATACAATGGAATATTACTCAGCCATA

AGAAAA--GATGAAATACTGCCATTTGTGACAACATGGATGGATCTTGAGATTA-TCATGCTAAGCGAAATAAGTCAGAC

AGAAAAAGTTGAGAACCATATGATTTCACTCATATGTGGGATATAAAACTGAAAGCAACAAACAAACAAGACAAACAAAC

AAAACTCATGGACACAGACAACAGTTTAGTGGTTACCAGAGGGAAAGGGGGGAG--GGGGAGGTAGATA-AGGGTAAAGG

GGGTCAAATATATGGTGACGGAAGGAGATTTGACTTTGGGTGGTGAACACACAATGCAATATACAT--ATGATGTATTAT

TGAATTGTACACTTGAAACCTAT-ATAATTTTATTAACCAATGTCACCCC-AATAAATTTAATTTAAAAAA---------

------------------------------------------------------------

>Eonycteris_spelaea

GTGGTGAAAATGGACACTT---TGTTATGTATATTTCGTCAC----AAT-AAAAA-TCT---GAAAACACTTATTCATAA

AGAT-------CACACACACACACACACACACACACATGCTCATTGCAGCATTAATCGCAATAGCCACGAC---------

ACCGAGGTGTCCTTTAATGAATGATTGGATA---AAGATTTGGTACACCTGTATATACAACAGAATACTACTTAGCCATG

AAACAC--GATGAAATA-TGCCATTTGCAACAACAAGAATGGATTTTGAGAACATTCATGCTAAGTGAAATAAGTCAGAG

GGAAAAGGCCAAGAACCATGCCGTTACAATC--ACGTGGGATATAGAACAGAAAACCACAAATGAACAAACAAAAC----

-AAACTCATAGACACAGACAACAGCATGGTGGTTACCAGAGGGGAAGGGACGTG--GGGGAGGACGAAGAAGGGTAAAGA

GGGTCAAATATGTGGTGACCGAAGGAGACTAGACTTTGGGTGGTGAGCCCGCAATGCAAGATACA--GATGACGGACCAT

AAAATTGCACACCTGAAACTTAT-ATAATGTTATTAACCAATGTTACCCCCAATAAATTTAATTTT--------TAAAAA

A--TT---AAG--GGAGAAATGACCAACTGTCAATAGAGAAAGCCTGGTGGCCCGCAGAA

>Pteropus_vampyrus

ATGGTTAAAATGGACAATTTTCTGTTATGTATATTTTGTCGC----AAT-AAAAAATCT---GAAAACACTTATTCATAA

AGATAAATATATATATATATATACATATATATACCTATGCTCATTGCAGCATTAATCACAATAGCCACGAC---------

ACCTAGGTGTCCTTCGATGAATGATTGGATA---AAGATTTGGTACATGTGTATATACAATAGAATACTACTTAGCCGTA

AA----------------------TTGCAACAACAAGAATGGATCTTGAGAACA-TCATGATAAGTGAAATAAGTCAGAT

GGAAAAGGACAAGAACCATACAATTGCAATC--ATGTAGGATATAGAACAGAAAGCCACAAATGAACAAACAAAACAAAC

-AAACTCATGGACACAGACAACAGCATGGTGGTTACCAGAGGGGAAGGGATGTGGCGGGGAGGACGAAG-AGGGTAAAGA

GGGTCAAATATATGGTGACGGAAGGAGACTAGACTTTGGGTGGTGAGCACACAATGCAAGATACG--GATGATGGATCAT

AGAATTGTACACCTGAAACTTAT-ATAATGTTATTAACCAATGTTACCCC-AATAAATTTAATTTT--------AAAAAA

AAATT---AAG--AGAGAAATGACCAACTCTCAGTAGAGAAAGCCTGGTGGCCTGCAGAA

>Hipposideros_armiger

ATGGTTAAAATGGACAATTTTATATTATGTATATTTTGTCAC----AAT-AAAAAATTT---GAAAACTCTTATTCATAA

AGAT----------ATATATCTTTATATATACCCCTATGTTCACTGCAGCATTAATCTCAATAGCCAAGACATGAAAACA

ACCTAAGTGTCCTTTGATGGATAATTGGATA---AAGATGTGGTACA----TGTACATAATGAAGTAACACTCAGCCATA

AAAAAAATGATGGAATACTGCCATTTGCAACAACATGGATGGATCTTGAAATTA-TCATGCTAAGTGAAATAAGTCAGAT

GAAAAAGGACAGGAACCAT--GATTTCATTC--ATGTGGGATATAAAACAGAAAGCAACAAAC-----------------

-AAACTCAGGGACACGTACAACAATATGGTGGTTACCAGAAGGGAAGGGGGTGG--GAGGAGGATGAAG-GAGGTAAAGG

GGGTCAAATATACGGTGACGGAAGGAGACTAGACTTTGGGTGGTGAGCACACAATGCAATATACATTGCTGATGTACTAT

AGAATTGTACACCCGTAATATAGAATAATGTTATCAACCAATGTTACCCC-AGTAAATTTAATTTA--------AAAAAA

AAATT---AAG--GGGGAAATGACCAACTCTCAG--GAGACAGGCGGGTGGCCCTCAGAG

>Megaderma_lyra

ATGGTTAAAATCAATCATTTTATGTTATGTATATTTTGTCACA---AAT-AAAAC-TTT---GAAAA----CATTCATAA

AGAT----ATACACATGTATCTTTATATATACTCCTATGTTCACTGCAGCATTAATCAC---AGCCAAGACATGGAAACA

ACCTAAAAGTCCTTTGATGAGTGACTGGATA---AAGATTTGGTACA----TATACACAATGGAATAATACTCAGTCATA

AAAAA---GATGGAATATTGC------------CATGGATGGATCTTGAGATTA-TCATGCTAAGTGAAAC-AGTCAGAT

GAAAAGTGACAAAAACCATATGATTTCACTC--ATGTGGTATATATAACAGAAAGCAACAAACAAAC-------------

-AAACTCATAGACACAAACAACAGTATGGTGGTTACCAGAGGGCAAGGGGGTGG--AAGGAAGATGAAG-AGGGTAAAGG

GGGTCAACTATATGGTGACAGAAGGAGACTAGACTCTGGGTGGTGAGCACACAATGCAATATACA--GATGATGTATTAT

AGAATTATATACCTGAAACTTAT-ATAATGTTATTAACCAATGTTACCCC-AATAAATTTAATTT---------TAAAAT

A--TT---AAG--GTGGACATGATCAATTCTCAATGGAGAAAGCTCAGTGGCCCACAAAG

>Desmodus_rotundus

ATGGTCCAAGTGGA---TTGTATGTCCCGTACATCTTGTCAC----AAT-AAAAAA-TT---------------------

--------------------------------------------------------------------------------

--------------------------------------------------------------------------------

--------------------------------------------------------------------------------

--------------------------------------------------------------------------------

--------------------------------------------------------------------------------

--------------------------------------------------------------------------------

--------------------------------------------------------------------------------

--------CAG--GGGAACATGACCACCTCTCAACAGAGAATGCCTGGTGGCCCACAGAT

>Myotis_brandtii

ATGGTTAAAATGGATAGTTTTGTGTTATGTACATCTTGTCAC----AAT-AAAAAA-CT---------------------

--------------------------------------------------------------------------------

--------------------------------------------------------------------------------

--------------------------------------------------------------------------------

--------------------------------------------------------------------------------

--------------------------------------------------------------------------------

--------------------------------------------------------------------------------

--------------------------------------------------------------------------------

--------AAA--GGGGACAGGACCAACTCTCAATAGAGAAAGCCTGGTGGCC-GCAGAG

>Equus_caballus1

ATGGTTAAAATGGACAACTTTATGTTATGTATATTTTGTCAC----AAT-AAGAAA-TT---------------------

--------------------------------------------------------------------------------

--------------------------------------------------------------------------------

--------------------------------------------------------------------------------

--------------------------------------------------------------------------------

--------------------------------------------------------------------------------

--------------------------------------------------------------------------------

--------------------------------------------------------------------------------

--------AAGGGGGAAACAAGACCACCCCTCAGGAGAGAAAGCCCGGATGC--------

>Equus_caballus2

ATGATTAAAATGGACAACTTTATGTTATGTATATTTTGTCAC----AAT-AAAAAA-TT---------------------

--------------------------------------------------------------------------------

--------------------------------------------------------------------------------

--------------------------------------------------------------------------------

--------------------------------------------------------------------------------

--------------------------------------------------------------------------------

--------------------------------------------------------------------------------

--------------------------------------------------------------------------------

--------AAGCAGGAAACAAGACCACCCCTCAGTAGAGAAAGCCCAGATGG--------

>Equus_caballus3

ATGGTTAAAATGGACAACTTTATGTTATGTATATTTTGTCAC----AAT-AAAAAA-TT---------------------

--------------------------------------------------------------------------------

--------------------------------------------------------------------------------

--------------------------------------------------------------------------------

--------------------------------------------------------------------------------

--------------------------------------------------------------------------------

--------------------------------------------------------------------------------

--------------------------------------------------------------------------------

--------AAGCAGGAAACAAGACCACCCCTCAGTAGAGAAAGACCGGATGC--------

>Bos_taurus

ATGGTTAAAATGGACAGATTTACGTTATGGATATTTTGTCAT----AATTGAAAAA-TG---------------------

--------------------------------------------------------------------------------

--------------------------------------------------------------------------------

--------------------------------------------------------------------------------

--------------------------------------------------------------------------------

--------------------------------------------------------------------------------

--------------------------------------------------------------------------------

--------------------------------------------------------------------------------

--------AAGAGGCAAACAAGACCACCTCTCAACAGAGAGAGCCCAGAGGCCCACAGGG

>Canis_familiaris

ACAGATGAA-TGGATAATTTTATGTCCT--ATATTTTGTCAT----AAT-AAAAAAATT---------------------

--------------------------------------------------------------------------------

--------------------------------------------------------------------------------

--------------------------------------------------------------------------------

--------------------------------------------------------------------------------

--------------------------------------------------------------------------------

--------------------------------------------------------------------------------

--------------------------------------------------------------------------------

--------AA-AGGGGGAAATGACCACTTCTCAACAGAGAAAGCCCAGT-GCCCACAGAG

**Marker Harm11_L**

>L1-3_PVa

-----------------------------------------------------------------AA---GATGAAATAC

TGCC-ATTTGTGACAACATGGATGGATCTTGAGATTATCATGCTAA-GCGAAATAAGTCAGACAGAAAAAGTTGAGAACC

ATATGATTTCACTCATATGTGGGATATAAAACTGAAAGCAACAAACAAACAAGACAAACAAACAAAACTCATGGACACAG

ACAACAGTTTAGTGGTTACCAGAGGGAAAGGGGGGAGGGGGAGGTAGATAAGGGTAAAGGGGG-TC-AAATATATGGTGA

CGGAAGGAGATTTGACTTTGGGTGGTGAACACACAAT-------------------------------------------

-------------------------------------------------------------------------

>Eonycteris_spelaea

TTTA--CTTTTGGGA-TTAAATTA----TTTCAGGTCTTAAATTTACATAAT---A-------CTAA---AATGGAATAC

TGCC-ATTTGTGACAATATGGATGGATCTTGAGAATATTATGCTAAAGTGAAATAAGTCAGA--GAAAAAGTCAAGAATC

ATCTGATTTCACTTATATATGGGATATAAAACTAAAAGCAAA----AAACAAGACAAA------AAAATCACAGACACAA

----CAGTATGATAGTTACCAGAGGGGATGTGCGTGG-GGGAGGTAAAAAAGAATAAAGGGGG-TCAAAATATATGGTGA

C---AGGGGATTTGACTTTGGGTGGTGAACACACACACACACACACACACACACACT-----------------------

--------AAAGAATACCAA---CCTTTAGTTTAATCAGCACAAAAAATAATATACTACAATCTTATTTAATG

>Pteropus_vampyrus

TTTA--CTTTTGGGAGATACATTAATTATTTCAGATCTTCAATTCACATAAT---A--------------AATGAAATAC

TGCC-ATTTGTGACAATATGGATGGATCTTGAGAATATCATGCTAAGGCAAAATAAGTCAGACAGAAAAAGTCAAGAACC

ATATGATTTCATTTATATGTGAGATATAAAACTAAAAGAAA-----AAACAAGACAAA-------AAATCACAGACACAA

----CAGTATGATGGTTACCAGAGGGGACGTGGGTGG-GGGAGGTAAAAAAGGGTAAAGGGGG-TCAAAAGATATGGTGA

C---AGGAGATTTGACTTTGGGTGGTGAACACACACACACACACACACACACACACACACACACACACACACATGCACAC

ACACA---CAAGAATACCAA---CCTTTAGTTTAATCAGCACAGAAAATAATATACTACAATTTTATTTAATG

>Hipposideros_armiger

TTTA--CTTTTGGGAGATACATTAATTATTTCAGACCTTAAATTTATATAAT---AAAGAATACCAA---GATGAAATAC

TGCCGATTTGTGACAACACATATGGATCTTGAAAATATCACACTAA-GCGAA----GTCAGATGGAAAAAGTCAAGAACC

GTATGATTTCACTCACTTGTGGGATATAAAACTGAAAGCAACAAATGAACAAGGCAGA---AAGAACCTCACAAACACAG

ACAATAGTATGGTGGTTATCAGA-AAAAAGGGGGTGGAGAGAGGTGGAAAAGGGTAAAGGGGGGTC-AAACATATGGTGA

CGAAAGGATATCTGACTTTGAGTGGTGAACACACAATT------------------------------------------

--------AAAAAAAAATAA---CCTTTAGTTTAATCAGCACAATAAATGATATCTTATAATTTTATTTAATA

>Rhinolophus_sinicus

TTTA--CTTTTGGGAGATACATTAATTATTTCAGACCTTAAACTTATATAAC---AAAGATTACCAA---GATGAAATAC

TGCCAATCTGTGACAACACATATGGACCTTGAAAATATCACACTAA-ACGAA----GTCAGATGGAAAAAGTCAAGAACC

ATACGATTTCACTCATTTGTGG-----AAAACTGAAAGCAACAAATGAACAAGACAGA---AAAAAACTCACAAACACAG

ACAACAGTGTGGTGGTTATCAGAGGGAAAAGGGATGGAGAGAGGTAGAAAAGGGTAAAGGGTGGTC-AAATATATGGTGA

TGAAAGGAGATCTGACTTAGGGTGGTGAACACACAATTAAAA--------------------------------------

--------AAAGAACAAAAA---CCCTTAGTTTAATCAGCACAATAAATGATATCTTACAATTTTATTTAATA

>Desmodus_rotundus

GTTATACTTTTGGGAGCCACATTA----TTTCTGACCTTAAATTCATAAAAT---AAAGACTAACTA-------------

--------------------------------------------------------------------------------

--------------------------------------------------------------------------------

--------------------------------------------------------------------------------

--------------------------------------------------------------------------------

-----------------------CCTTTAGTTTAATCCGCACAATAAATAATAACTTACAATTTTATCTCACA

>Myotis_brandtii

TTCATACTTTTGGGAGCTACATTA----TTTCTGACCTCAAATTTATATAAT---AAAGACTACCTA-------------

--------------------------------------------------------------------------------

--------------------------------------------------------------------------------

--------------------------------------------------------------------------------

--------------------------------------------------------------------------------

-----------------------CCTTTAGTTTAATCAGCACAATAAATGATATCCTATCATTTTATTTCATG

>Equus_caballus

TTTATACTTTTGGGAGATACATTATTTATTTCAGACCTTAAATTCATATAAT---AAAGAATAC-AA-------------

--------------------------------------------------------------------------------

--------------------------------------------------------------------------------

--------------------------------------------------------------------------------

--------------------------------------------------------------------------------

-----------------------CCTTTAATTTAA---GCAGAATAAACGATATCCTATCATTTTATTTCATG

>Bos_taurus

AGTATATTTTTG-GAGATACATTA----TTTCAGACCTTCGACTCAT---AT---AAAGAACACCAA-------------

--------------------------------------------------------------------------------

--------------------------------------------------------------------------------

--------------------------------------------------------------------------------

--------------------------------------------------------------------------------

-----------------------CCTTTAGTTTAATCAGCACAATGAATGATATCCTCCAATTTTATTTCATG

>Manis_pentadactyla

TTTATACTTTTGAGAGACA-ATTA----TTTCAAACCTTAAATTCATTTAAT---AAGGAATACAAA-------------

--------------------------------------------------------------------------------

--------------------------------------------------------------------------------

--------------------------------------------------------------------------------

--------------------------------------------------------------------------------

-----------------------CCTTT-----AATCAGCACAATAAATGATATCCCACAATTTTACTTCATG

**Marker Harm15_L**

>L1MA9_3end

------------------------------------------------------TTTGCTAAGAGAGTAGATCTTAAGTG

TTCTCA-------------------------------CCACACACAAAAAAATGGTAACTATGTGAGGTGATGGATATGT

TAATTAGCTTGATTGTGGTAATCATTTCACAATGTAT---ACGTA-TATC------------------------------

--------------------------------------------------------------------------------

-------------------------------------------------------------------------------

>Eonycteris_spelaea

CTTCTACCTCGACCCT-CTCTTTGCCCTCCACATTCCGTCAAGGTGAGTCT---TTCGTGAAGATTGTAGATCTTAAGTG

TTCTCA------------------------AT----------GTTTGAAAAACGATAGCTATGTGAGGTGATGGATGTGT

TAATCAACTTCATCGTGGTAATCGTTTCACAGGGTAA---ACACG-TCTCCCTCCAGG---------------------T

CACCTGTCACACACATACACCCTC--------------------------------------------------------

---------------------------------------------------------CTCCTCCTTTGCTGGCCACCTC

>Pteropus_vampyrus

CTTCTACCTCAACTCT-CTCTGTGCCCTCCATGTTCAGTCAAGGTGAGTTT---TTCGTTAAGAGAGTAGATCTTAAGTG

TTCTCA------------------------AT---------TTTTAAAAAAACGATAACTATGTGAGGTGATGGGTGTGT

TAATCGACTTGATCGCGGTGATCATTTCACGGGGTAA---ACATG-TCTCCCTCCGTG---------------------T

CACCTGTCACACACATACACCCTC--------------------------------------------------------

---------------------------------------------------------CTCCTCTTTTGCTGGCCACCTC

>Hipposideros_armiger

CTTCTGCCCCAATCCT-CCCTTTGCCCTCCACATTCGGCCAAGGTGAGTCT---TTTGCTAAGAGAACAGACGTTCGGTG

TTCTCA------------------------CCACACACACATACACACAAAAAGACAACTATGTGAGGTGGTGGATGTGT

TAATCAGCTCGATCGTGGTAATCATCTCACAATGTAA---GCGTA-TCTCCCTCCATA---------------------C

CATCTCTCACACACACACACACGCACGCACGCACACACACACGTTCACACACACACACACAC------------------

-----ACACACACACACACACACACACACGCATGCACACACGTTCACACACAGCCTACTCTTCTTTTGCTGGCCACCCC

>Megaderma_lyra

CTTCTACCCCAGTCCT-CTCTTTGTCCTCCA--TTCAGTCAAAGTGAGTAT---TTTGCTAAAAGAATAGATCTTAAGTG

TTCTCACCCCCCCCCCCCCCCCCCCCCCCCACACACACCGACACACACACACAGACAACTATGTGAGGTAATCGATGTGT

TCATCAACATGACCCTGTT---CATCTCACAACGTAC----CAGA-CCTCCCTCCACA---------------------G

CATCTGTCACACGTGCACACATACGCCCACACACACACCCT---------------------------------------

--------------------------------------------------------------------CTGGCCATCTC

>Desmodus_rotundus

AGTGCCCCGCTATCCT-CTCT--GCCCCCA-----CAGTCAGGGAAGGTCT-----------------------------

--------------------------------------------------------------------------------

----------------------------------------GCTGATAGTCCCTCCACG---------------------T

CATCTTTCACTCTCTCTCTCTCACAC------------------------------------------------------

-----------------------------------------------------CCTACTCCGCTTATGAAG-CCACCTC

>Miniopterus_natalensis

ATCACACCTCAATCCT-CTCG--GCCCTCTGCTCTCCGTCAAGGGGAGTCC-----------------------------

--------------------------------------------------------------------------------

----------------------------------------ACTGATTGTCCCTCTGTA---------------------T

CATCTTACGCGCGCACACACACAAACACACACGCACACC-----------------------------------------

---------------------------------------------------------CTGCTCTTGTGCTGGCCACCTC

>Equus_caballus

CTCATACCTCCATCCT-CTCTTTGCTCTTCACTTTCAGTCAAGGTGAGTCT-----------------------------

--------------------------------------------------------------------------------

----------------------------------------GCTGATTCTCCCTCCATA---------------------T

CAGCTTTCAGAGACACTCTCTCTCTCAAACAGACACAAACCC--------------------------------------

-----------------------------------------------------CCAACTCATCTTTTGCTGGCCACCTC

>Bos_taurus

CTTGCACACCGGTCCT-CTTC--ACCGTCCATGGTCGACCGAGG--AGTCC-----------------------------

--------------------------------------------------------------------------------

----------------------------------------GCCGA-CCTCCCTTCATA---------------------T

CATCTTCCACACACAGGCACACACACTCACA-------------------------------------------------

---------------------------------------------------------GTCCTCTCGCACCAGCCACCTC

>Canis_familiaris

CTCCTGGTCAGGTCCTTGAGTCTGCCCTCCACACTGAGTCAGGGTGACTCT-----------------------------

--------------------------------------------------------------------------------

----------------------------------------ACAGATTGCCCCTCCATTAGCCTCCCTCTCTCTCTCTCTC

TCTCTCTCACACACACACACACACACACACTCACACACCCTCACAGTCATCCACACTCACTCTCACATCCTCACACTCAC

TCCTCACACACTCATTCACACACTCACACCCTTCCACACACACTCACACACACCTGACTCCTCTTTGCCTGGCCACCTC

**Marker Harm20_L**

>L1-4_PVa

-----------------------------------------------------AAGTGAAATAAGTC---AGACAGAGAA

AGACAAATACCATATGATTTCACTTATATGTGGAATCTAAAGAACAAAATA-------AATGAACAAACAAAATGAAAAC

AGACTCATAGATACAGAGAACAAA-CTGGTGATTGCCAGATGGGAGGGGGGTTGGGGGGCTGGG-TGAAAAAGGTGAAGG

GATT---AAGAAGTACAAATT-----------------------------------------------------------

---------

>Eonycteris_spelaea

TATTTGATTTTCCCAGCCTGAAAACAGT------------AAGGTTAA-----GAGTGAAATAAATC---AGACAGAGAA

AGACTAATACCATATAATCTCACTTATGTGTGGAATCTAAAAAACAAACCAAAAAAGTAAAAAACAAACAAAACAGGAAC

AGACTCATAGATATAGAGAACAAA-CTGATGGTTGTTAGCTGGGAGGGG--TGTGGGGGCTGGG-TGAAAGAAGTGAAGG

GATT---AA-GGGAGAGAATTC---TTCCACTCAGTCTTTTATTCTTTTCAGGCCCACCTGCCTCGGC------------

--CTTTGCT

>Pteropus_vampyrus

TATATGATTTTCCCAGCCTGAAGACAGT------------AAGGCTAA-----GAGTGAAATAAATC---AGACAGAGAA

AGACTAATACCATATAATCTCACTTATATGTGGAATCTAAAAAACAAACAAAAAA---AGTGAACGAACAAAACAGAAAT

AGACTCA--GATATAGAGAACAAA-CTGATGGTTGTTAGATGGGAGGGGA-TGTGGGGGCTGGG-TGAAAAAAGTGAAGG

GATT---AAGGGGAGAGAATTC---TT----TCAGTCTTTTATTCTTTTCAGGCCCACCTACCTTGGC------------

--CTTTGCT

>Hipposideros_armiger

AAGACAGATGTCTCAGCCTAAAGACAAAGAATAAAATAAGACAGAAAA-----AAATAAAATAAGCC---AGACAGAAAA

AGACAAATACCATATGACCTCACTTATATGTGTAATCTAAAAGCCAAAATA-------AATGAACAAACAAAACAGAAAC

AGGATCATAGATCCAGAGAACAAAACTAATGGTTGCCAGATACAAGGGGGGTTCTGAGGATGGG-TGAAA-AGGAGCAGG

GATT---AAGGAGACAGAATTC---TTACACTCAGGCTTTTATTCTATTCAGGACCACCTACATTGGG--GAGAGCAATG

GACTTTACT

>Megaderma_lyra

AAGAC-AATGTCTCAGCCTAAAGACAGA----------------CAAA-----GAATAAAATAAGTC---AGACAGAGAA

AGACAAATAACATACAATCTCACTAATATATGGAATCCAAAAATCAAAACA-------AACAAACAGTCAAAACAGAAAC

AGACTCATAGATACAGAGAATAAA-CTGATGGATGTCAGATACGAGGGGAGTTTGGGGGGTGGTGTAAAAATGGTGA-CA

GATT---AAGGAGAGAGGTTGC---TTTTGCTCAGCCTTTTATTCTAATCAGGCCCACCTACACGGGG--GAGAGCAATT

GACTTTGCT

>Desmodus_rotundus

AAGACCAATGTCCCAGCTTGAAGGCAGT------------CAGTCAAA-----GAG-GA-----GTC-------------

--------------------------------------------------------------------------------

--------------------------------------------------------------------------------

-------------------------TT--ATTCAGCCTTTTATTCTATTTAGTCCCACCTACTTTGGGCAGAGAGCAATC

TGCTTTACT

>Myotis_brandtii

AAGACCAATGTCCCAGCTTGAAGACAGT------------CAGGCAAA-----GAGAGA--GAATTC-------------

--------------------------------------------------------------------------------

--------------------------------------------------------------------------------

-------------------------TTTCACTCAGCCTTCTATTCTAGTCTGGCCCACCTTCATTGGGCAGAGAGCAATC

TGCTTTACT

>Equus_caballus

AAGACCAGTGTC---AGGCGAAGACAGT------------CAGGCAAA-----AAGAGA--AAATTC-------------

--------------------------------------------------------------------------------

--------------------------------------------------------------------------------

-------------------------TTT--CTTAGCCTTTTATTCTTTTCAGGCCCACCTACAATGGG--GAGAGCAATC

TGCTTGACT

>Bos_taurus

GAAAATAACTTTTCAATTTGAAGACAGG-----------------GAA-----AAAAGA--AATTTT-------------

--------------------------------------------------------------------------------

--------------------------------------------------------------------------------

-------------------------TCTAACCCAGCCTTTTATTCTATTCAGGTCAACCTACATTGGG--GAGGGTAATT

AGCTTT-CT

>Canis_familiaris

AAGACCAATGACCCAGTTTGAAGACAAT------------CAGACAAA---GGGAGAGA--ATTCTC-------------

--------------------------------------------------------------------------------

--------------------------------------------------------------------------------

-------------------------TCTTCCTCAGCTTTATATCCTATTCAGGCTCACCCACATTGGG---AAAGCGATC

TTCCTTATT

**Marker Harm24_L**

>L1-3_PVa

----------------------------------------------------------AAAAG--ATGAAA---TACTGC

CATTTGTGACAACATGGATGGATCTTGAGATTATCATGCTAAGCGAAATAAGTCAGACAGAAAAAGTTGAGAACCATATG

ATTTCACTCATATGTGGGATATAAAACTGAAAGCAACAAACAAACAAGACAAA----CAAAC-AAAACTCATGGACACAG

ACAACAGTTTAGTGGTTACCAGAGGGAAA-GGGGGGAGGGGGAGGTAGATAAGGGTAAAGGGGGT------------CAA

ATATA-TGGTGACGGA---------------AGGAGATTTGACTTTGGGTGGTGAACACACAATGCAATATACATATGAT

GTATTATTGAATTGTACACTTGAAACCTATATAATTTTATTAACCAATGTCACCCCAATAAATTTAATTTAAAA------

----------------------------------------------------------------------

>Eonycteris_spelaea

ATCGGTGAGGGGACAATTGTTGGTGAAGAATTGTGCTGATCAAGATGATGATAT---AAAAAGCCATGAG-----ACTGC

CATTTGCAACAACATAGATGGATCTTGAGAATATCATGCTTAGCAAAAGAAGTTAAATGGAAAAAGTCAAGAACCAT--G

ATTTCACTCATATGCAGGACATAAAACTGAAAGCAACAAATGAACAAACAAGACGCACAAACAAAAACTCATAGACACAA

ACAATAGTGTGGTGGTTACCAGAGGGAA--GGGTGGTGGGGGAAGTAGAAAAGGGTAAAGGGGGT------------CAA

ATGTAGTGGTGACAGA------TTTGACTCAAGGAGA-TTGACTTTGGAGTGTGAACACGCAATGCAATATACAGGCTAT

GTATTATAAAATCGTATACTTGA------TATAATTTTCTTAATCACTGTCACCCCAAT-----AAATAAAATTTTT---

AA-GAAGCCATGAGG---GCTATGAA--TATGTGAAGAGGGGCATCAGAGAAGGCTGAAAATGAAATTTC

>Pteropus_vampyrus

ATTGGTGAGAGGACAATTGTTGATGAAGAATTGTGTTGACCAAGATGGTGATAT---AAAAAGCCATGAGG---TACTGC

CATTTGCAACAACATAGATGGATCTTGAGAATATCATGCTTAGCAAAATAAGTTAAATGGAAAAAGTCAAGAACCAT--G

ATTTCACTCATATGTAGGATATAAAACTGAAAGCAACAAATGAACAAACAAGACACACAAACGAAAACTCATAGACACGA

ACAATAGTATGGTGGTTACCAGAGGGAA--GGGTGGGGCGGGGAGTACAAAAGGGTAAAGGGGGT------------CAA

ATATATTGGTGACAGAAAGAGATTTGACTGAAGGAGATTTGACTTTGGGTGGTGAACATACAATGCAATATACAGATTAT

GTGTTATAAAATCATATACTTGAAATCTATATAATTTTCTTAACCACTGTCACCCCAATAAA--TAAAAATTTTTTT---

AAAGAAGCCATGAGA---GCTGTGAA--TATGTGAAGAGGAGCATAAGAGAAGGCTGAAAACGGAATCTT

>Hipposideros_armiger

AATGGGGAGGGGAGAGTAATTGATGAGGAATTGTGCTGGCTGAGATGGTGATAT---CAAAAGCCATGAGG---TACTGC

CATTTGTGACAATATGGATTGCTCTTGAGATTATTATGCTAAACAAAATAAGTCAGACTGAAATAGTCAAGAACCAT---

ATTTCACTCATATGTGGGATATAAAACTACAAACAACAAACAAG----------------ACAAAAACTCATAAATACAG

AAAACAGTTTAGGGGTTACCAGAGGGAAATGGGGTGGAGAGGAGGTAGATGAGGGTAAAGGGGGT------------CAA

ATACA-GGGTAATGGA---------------AAGAGACTTGACTTTGGGTGGTGAGCACCCAATGCAATATACAGATGAT

GTATTATAGAATTGCACACTTGAAACCTATTTAATTTTATTAACCAATGTCACCCCAATAAATTGAATAAAATTTTT---

---------TTAAAA---GCTGTGAGAATTTGAAGAGAGGAGCATAAGAAAAGGCTGAAAATGGAACCCT

>Megaderma_lyra

CATGGTCAGGGGA----------------------------------GTGATGT---AAAGAGCCATGAGG---TACTGC

CCTTTGTGACAATATGGACGGATCTTGAGATCATCATGCTAAGCGAAATAAGTCAGATGAGAAAAGTCAAGAACCATATG

ACTTCACTCATATGTGGGATATAAAACTGACAGCAACAAAGGAGCAAGGAA------------AAAACTCATAGACACAG

ACAACAGTTGAGTGGTTACCAGAGGGAAATGGGGGTGGGAGGAGGTAGAAGTGGGTGAGGGGGGTGTGTGTGTAAAATAA

ATATA-TGGTGATGGA---------------TAGAAAGTTGCCTGTGGGTGATGAACGCACAATGCAACACACAGATGAT

GTATTATAGAATTGCACACTTGAAACCTATATAATTTTATTAACCAGTGTCCCACCAATAAATTTAATAACATTTAA---

AAA-----AAT-AAA---GCTGTGAGAATGTAAAGGGAGGAGCATAGGAGAAGGCTGAAAATGGAATCTT

>Desmodus_rotundus

AATGGTGAGGGGAGAGGGGTTGATGAAGAATTGTGCCGGCCAAGAGGGTGGTAT---AAAAAGCCATGAGG---------

--------------------------------------------------------------------------------

--------------------------------------------------------------------------------

--------------------------------------------------------------------------------

--------------------------------------------------------------------------------

--------------------------------------------------------------------------------

------------------GCTGTGAGAATGTGAAGAAAGGAGCAAAAGAGAAGGCCAAACATGGAATCTT

>Myotis_brandtii

AATGGTGTGGGGAGAAGGGTTGAAGAAGAATTGAGCTGGCCGCGATGGTGATAT---AAAAAGCC-TGAGG---------

--------------------------------------------------------------------------------

--------------------------------------------------------------------------------

--------------------------------------------------------------------------------

--------------------------------------------------------------------------------

--------------------------------------------------------------------------------

------------------GCTGTGAGGATGTGAAGAGAAGGACAAAAGAGAAGGCTGGAAATGGCATCTT

>Equus_caballus

AATAGTGAGGGGAGAGGTGTTGATGAAGGATTGTGCTGGCCAGTCTGATGATA----AAAAAGCCATGAGG---------

--------------------------------------------------------------------------------

--------------------------------------------------------------------------------

--------------------------------------------------------------------------------

--------------------------------------------------------------------------------

--------------------------------------------------------------------------------

------------------GCTGTGAG-ATGTGAAAAGAGGAGCAT--GAGTAGGCTGAA-ATGGAATCTT

>Bos_taurus

AGAGGTGACGGGG--GGCGCTGGTGAGGAACTGTGCTGCT---GCCGGGGGTAT---ACAAAGCTATAAGG---------

--------------------------------------------------------------------------------

--------------------------------------------------------------------------------

--------------------------------------------------------------------------------

--------------------------------------------------------------------------------

--------------------------------------------------------------------------------

------------------GCCGTGAGACCGTCAACACAGGAGCCTACGG--AGGCAGAAGGCGGAACTTT

>Canis_familiaris

AATGGTGAGGGGCGAAGGGTTGATGCCGAGC-GTGCTGGCCGGTTTGGTGATAT---GAAAAGCCACCGGG---------

--------------------------------------------------------------------------------

--------------------------------------------------------------------------------

--------------------------------------------------------------------------------

--------------------------------------------------------------------------------

--------------------------------------------------------------------------------

------------------ACCGTGAGAACGTG-AGAGAGGATC-TA-GGGAAGGCTGGAAATGGACTCTT

**Marker Harm29_L**

>L1-2_PVa

------------------------------------------------------------AGGGGGGTAGGGGGAGGGTG

AAGTGGGTAAAGGGGATCAAAT--------ATATGGTAGCTGAAGGAAACTGGACTTTGGGTGGTAAACACACAATAGAA

TATACAGATGTCAAATTATAA---TGTACACCTGAA-AATTATATAATTGTATTAACCAATGTTACCCCAATAAACTTAA

TTAAAA---AATAAAA-----------------------------------------------------

>Eonycteris_spelaea

GCTTGATT-TTCTTTCCTCCTTCC-ATCCA-CCTCTTCCCCC-AGCC---TGAGGGG---TGGG--CGGGGAGGGGGGCA

ACTTGGGGCAAGGGGGTCAGCT--------AGATGGTGACGGAAGAGAACCAGGCTTTCGATGGGGAGCACGCAATAACG

TATGCAGATATTGGATTGTAA---CACGTGCCTGAA-----------ATTTGTTAGCCAGTGTTACTTCAGTAAATTTAA

TGGGAA---AAAAAAG---GTCCTTTGGCTACGATCACACGATCGCAGTGGATGCAGAAGGTGCAGAAG

>Pteropus_vampyrus

GCTTGGTT-TTCTTTCCTCCTTCC-GTCCATCCTCTTCCCCA-AGCC---TAAGGCG---CAGGAGGGGAGGGGGGAGGG

GAGGGGGGAGGGGAGGGCAACTCGGGGAAAGGATGGTGACGGACGAGAACCAGACTTTGGGTGGGGAGCACGCAATAGCG

TGTACAGATATCGAATTGTAA---CGCATGCCTGAA-----------ATTTGTTAGTCAGTGTTACTTCAATAAATTTAA

CT--TA---GAAAAAG---ATCCTTTAGCTACGATCGCATGATCGCAATGGAGGCAGAAGATGCAGAGG

>Hipposideros_armiger

GGTTGGTTCTTCTTTCCTCCTTCCGGTCCATCCTCCTGCCCACAGAT---TGAGGGG---AAGGGGGTGAGGGGAAGGCA

ACTTGGGTAAAGGGGGTCAACT--------CTATGGTAACGAAAGGAAATAAGACTT--GGTGGTGAGCATGCAATAGCG

TATATAGATATCCAATTATAATGTTGTACACCTGAACATTTATATAATGTTATTAGCCAAGGTTACCTCAATACATTGAA

TTAAAA---GAAAAGA---TTCTTTTTGCTCTGCTCACATGATTGCAACGGAAGCAAAAGATGCAGAGG

>Rhinolophus_sinicus

GCTTGGTTCTTCCTTCCTTCTTCCAGCCCATCCTCCTCCCCACAGCT---TGAGGGA---AAGCGGCTGACGGGAATGCA

ACTTGGGTAAAGGGGGTCAACT--------ATATGGGAACGGAAGGAAACGAGACTTTGGGTGATAAGCACGCAATAGCA

TATACAGATTTCGAATTATAATGTTGTACACCTGAA-ATGTATATCATGTTATCAGCCAAGGTTATCTCAATACATTTAA

TCTAAA---AAAA-GA---TTCTTTTTTCTCTGGTCACATGATTGCAATGGAAGCACAAGATGCAGAGG

>Desmodus_rotundus

GACTGGTTCTTCCTTCCTCCTTCCAGTCCATTTTGCT-CCCATGGC----TACAAGA-----------------------

--------------------------------------------------------------------------------

--------------------------------------------------------------------------------

-------------------TCCTTTCTGCTCTGGTCACAGGATGGCAGCAGAAGCGAAAGACGTGGAGG

>Miniopterus_natalensis

GGTGGACT-CTCCTTCCTCCGTCCAGTCTATCTTCCT-CCCACGAC----GAAAAGA-----------------------

--------------------------------------------------------------------------------

--------------------------------------------------------------------------------

-------------------TCCTTTCTGCTCTGACCAC--GATTGCAATGGAAGCGAAAGATGCTGAGG

>Equus_caballus

GATCGGTTCTCCATCCTTCCTTCTGGTCCATCTTCCCGTCCACAGC----TGA-AAA-----------------------

--------------------------------------------------------------------------------

--------------------------------------------------------------------------------

-------------------ACCCTTCTGCTTTGATCATGTGATTGCAATGCAAGCGAAAGATGCATGGG

>Vicugna_pacos

GGCTGGCCCTCCTTTACTCCTGCTGGTCC-------TCCCCGCAGC----AGAGAGA-----------------------

--------------------------------------------------------------------------------

--------------------------------------------------------------------------------

-------------------TCCTTTCTGCTCTGATCTCAGGATTGGTACGGAAGCGGAAGATGCAGAGG

>Canis_familiaris

CACTGG--------TCCTCCTTCACACCTACCTTCCTCCTCGTGGC----AAAAGGA-----------------------

--------------------------------------------------------------------------------

--------------------------------------------------------------------------------

-------------------TCCTTTCTGCTTTCATCACATGAGGACAATGCAGGGGGAAGATGTGG-AG

**Marker Harm34_L**

>L1-4_PVa

--------------------------------------TT---AAGAAGTA-CAA---ATTGGTAGTTACAAAATAGTCA

CGGGGATGTAAAGTACAGCATAGGGAATATAGTCAATAATATTGTAATAACTAT------GTATAGTGCCAGGTGGGTAC

TAGACTAATCGGGGGG--ATCACTTCGTAAATTATATAAATGTCTAACCACTATGCTGTACACCTGAAACTAATATAAAA

TAATATTGAATGTCAACTC-TAATTGAAAAAA--------AAAA------------------------------------

-----------------------------------

>Eonycteris_spelaea

ATGACATACAATATAGGAAGAAAACA--GTGCATTAATTT---GAAAGATATCAA---ATTGGTAGTTATGAAATAGTCA

CAGGAATGTAAAGTACAGCATAGAAAATATAGTAAATAATATTGTAACAACTAT------GTATGCTATCAGGTGAGTAT

T-GACTTATTTAGGGGGAATTACTTTATAAATTACATAAATGTCTAACTAGTACATTGTACACATGAAA---------TG

TAATATTAATTGTCAA-TG-TAACTGAAAAAC----AAAAAAAA---GAAAGATATCA----CATTTAAGCTA--CTGGT

TCAGTTTTTAAAGGAATCT-TTTTCTTAAAAGGAA

>Pteropus_vampyrus

ATGAGATACAATACAGGAAGAAAACA--GTGCATTAATTT---GAAAGATATCAA---ATTGGTAGTTATGAAAGAGTCA

CAGGAATGTAAAGTAAAGCATAGAAAATATAGTAAATAATACTGTAACAACTAT------GTA-GGTGCCAGATGGGTAT

TAGACTTATTGAGGGGGAATTACTTCATAAATTACATAAATGTCTAACTAGTACATTGTACACATGAAA---------TG

TAATATTAATGGTCAACTG-TAACTGAAAAAC-----AAAAAAA---GAAAGGTATCA----CATTTGAGCTA--CTGGT

TCAGTTTTTAAAGGAATCT-TTTTCTTGAAAGAAA

>Hipposideros_armiger

-----ATACAATACA-GAAAAAAACATAATGCATTAACTT---AAAAGATATCAA---ATTGATAGTTACAAAATAGTCA

AGAGGATGTAAAGTACAGCACAGGGACTGTAGTCAATAATATTGTAATAACTAT------GTGTGGTGCCGGATGGGTGC

TAGAGTAATCGGGAA---ATCACTTCATAAATTATATAAATGTCTAACCACTATGTTGTACACCTGAAACTAA-----TA

TAATACTGAATGTCAACTGTTAATTGAAAAATT------AAAAA---GAAAGGTATCAA---TATTTGAACTA--CTGGT

TCAGTTTTTAAAGGAATTT-TTTTCTTGAAAGGAA

>Megaderma_lyra

ATGAGATACAATACAAGAAGAAAACAT-ACGCATTAATGT---GAAAGATATCAA---ATTGGTAATTACAAAGTAATCA

TGGGGATATAAAGTATAGCATAAGGAATATAGACAATAATATTGTAATAACTATTACTATATATGGTACCAGATGGATAC

TACACTAATTGGGGGG--ATCATTTCACAAATTATATAAACATCTAGCCACTATGCTGTATACCTGAAACTAATGTAAAA

TAATCTGGAATGTCAACTG-TAATGGAAAAATTTTAAAAAAAAA---GAAAGATATCAA---TATTTGAGCCA--CTGGT

TCAGTTTTTAAAGAAATTT-TTTTCTTGAAAAGAA

>Desmodus_rotundus

ATGAGATACAGCACAGGAAGAAAAGA--ATGCATTAATTT---GAAAGATATCAA-------------------------

--------------------------------------------------------------------------------

--------------------------------------------------------------------------------

--------------------------------------------------------------TCTTTGAGCTA--CTGGT

TCAGTGTTTAAAGAAATTTTTTTTCTTTAAAGAAA

>Myotis_brandtii

ATGAGATATAGTACAGGAAAAAAA-ATAGTGCATTAATTT---TAAAGATATCAA-------------------------

--------------------------------------------------------------------------------

--------------------------------------------------------------------------------

--------------------------------------------------------------TATTTGGTTTAAACTGGT

TCAGTGTTTA--AAAATTTGTTTTCTTGAAAGAAA

>Equus_caballus

ATGAGATACAACACAGGAAGAAAACACAATGCATTAATTT---GAAAGATATCAA-------------------------

--------------------------------------------------------------------------------

--------------------------------------------------------------------------------

--------------------------------------------------------------TATTTGAGCTA--CCGGT

TCATTTTTTTAAAAAAATC-TTCTTCTGAAAGGAA

>Vicugna_pacos

ATGAGATACCATATAGGAATAAAATATAATGCATTAATTT---GAAAGATATAAA-------------------------

--------------------------------------------------------------------------------

--------------------------------------------------------------------------------

--------------------------------------------------------------TATTTGAGCTA--CTGGT

TCAGTTTTTAAAGGAAATTTTTTTCTTGAAAGGAA

>Felis_catus

AGGAGATATAATACAAGAAGAAAACAGCATGCACTAATTT---GAAACATATCAA-------------------------

--------------------------------------------------------------------------------

--------------------------------------------------------------------------------

--------------------------------------------------------------TATTTTAGTTA--CTGGT

TCAGTTTCTAAAGATAGTTTTATTCTTGAAAGGAA

**Marker Drot13_L**

>HAL1-3_PVa

-------------------------------------------------------------------ATGGATAAAGAAG

AGGTGG--TACATA------------------------------------------------------------------

--------------------------------------------------------------------------------

--------------------------------------------------------------------------------

--------------------------------------------------------------------------------

--------------------------------------------------------------------------------

---------------------------------------------------TATACAATGGAATATTACTCAGCCATAAA

AAAGAATGAAATCTTGCCATCTGCAACAACATGGATGGACCTAGAGGGTATTGTGCTGAGTGGAGTAAGTCAGACAGAGA

AAGACAAATGCCATATGATTTCACTTACATGTGGAATCT------------AAAGAACAAAATAAAC-----AAACAAAA

C-----------------------------------------------------------------------------

>Eonycteris_spelaea

AAATAAACATTAGTTATCATGATGAGG-GTGATTATG---AAAAGTGTAGGATG---TGACAGAGAAATGGATTAAGAAG

GTGTGGTACATATA------------------------------------------------------------------

--------------------------------------------------------------------------------

--------------------------------------------------------------------------------

--------------------------------------------------------------------------------

--------------------------------------------------------------------------------

---------------------------------------------------TATACAATGGACTATTAGTCAGCCATAAA

AAAGAATGACATTTTTCCACTTGCGACAACGTATATGGACCTAGAGAATATTATGCTAAGCGAAACGAGTCAG-------

----------------------ACCTACATGTGGAATCTAAAAAAAAAAAAAAAAAACAAAATAAAC-----AAACAAAA

C----AAA--TGTGGGATG---ACTTAAGGATTGCCTCGAGATCCC--AGTGT---CAGCATTTTCCCTTCCGG-TCT

>Pteropus_vampyrus

AAATAAACAATAGTTATTGTGATGAGG-ATGATTATC---AAAAGTGTAGGATG---TGACAGACGAATGGATTAAGAAG

ATGTGG--CACATA------------------------------------------------------------------

--------------------------------------------------------------------------------

--------------------------------------------------------------------------------

--------------------------------------------------------------------------------

--------------------------------------------------------------------------------

---------------------------------------------------TATACAATGGACTATTAGTCAGCCATAAA

AAAGAATGAAATTTTTCCACTAGCGACAACATAGGTGGACCTAGAGAATATTATGCTAAGTGAAATAAGTCAG-------

----------------------GCTTACATGTGGAATCT-----------AAAAAGACAAAATAAAC-----AAACAAAA

C----AAAAGTGTGGGATG---ACGTAATGATTGACTCGAGA----------------------TCCTTTCTGG-TCT

>Desmodus_rotundus

AAATAAACGTTCGCTATCGCGATAAGG--TAACTATT---GAAAGTGTAGGATG---TGGCAGACAGATGGAT---AAAG

ATGCGG--TACACA------------------------------------------------------------------

--------------------------------------------------------------------------------

--------------------------------------------------------------------------------

--------------------------------------------------------------------------------

--------------------------------------------------------------------------------

---------------------------------------------------TATAGAGTGGAATATC----AGTCATAAA

AAAGAAAGAAATCTTGCCACTTGCAACTACACGGATGGACGTAGAGGGTCTCCCGCGAAGTGAAATGAGTCAG-------

---ACAAACGCCGCATGATTTCACTCATACGTGACGTCT------------CAGAAACAAAGTAAAC-----ACACAAAA

C--------GAGTAGGATG---ACTTCATGATTGTCTCGGGGTCCCAGAGCGT---CAGCACCTTCCCTCCCGGAGCT

>Miniopterus_natalensis

AAATAGACATTAACTATCATGATGAGT-ATGATTATT---AAAAGTGTAGCATG---TGATAGACAAATGGGT---GAAG

ATGTGGTATACATATATAGGGTATCCCGAAAAATGCATACACACTTTAACAGCTGATAACTAACTTAGTTTTCACTCCTT

TACAGGTTTAACTGATTTGAAATAGTGGGTGAAGCCAGACTAAGCTTTGAACAAAGAAAATTTACCCTAAAGGGCCACTA

GACTTTTTTATGGGGATACATAAAAGATAAGTTTATGGTACAAAACCAGCAACAGTCAATGAATTGAGGGCATACAATAC

TGAACAAAATGATTCTTAATGTTTGTGATTCCATTGCTTCACGTTAGCAGCAGCACTTGGACCAGAATGGTCATCAGTTT

GAAAACAGGCATTGACCAAAAAAATTATTCATTTCTGTCGAGTCTTTTAAATTTTGAAAATGAACCATATGTTAATAAAC

ACTGACTTTATAATCATTCAAAGTGCATATATATTCTTTTAGGAGACCCTGTATATAATGGAATATT----AGCCATAAA

AAAGAATGAAATTTTGCCATTTTTGACAACATAGAAGAACCAAGAGGGCATTATGTTGTGTAAAATAAGTCAGACAGAAA

AAAACAAATACTATATGATTTCACTTACATGTGAAATCT------------AAAAAACA--ATAAACAAACAAAACAAAA

CA---GAAAGTGTAGGATG---ACTTCATGATTATGTCGAGATCCCGGAGCCT---CAGCACTTTCCCTTCTGG-TCT

>Hipposideros_armiger

GAATAAACCTTAGCTATCCTGAGGAGG-AGGATTATT---AAAAGTGTAGGATG--------------------------

--------------------------------------------------------------------------------

--------------------------------------------------------------------------------

--------------------------------------------------------------------------------

--------------------------------------------------------------------------------

--------------------------------------------------------------------------------

--------------------------------------------------------------------------------

--------------------------------------------------------------------------------

--------------------------------------------------------------------------------

----------------------GCTTAATGATTATCTCGGGATCCCAGAGTGT---CAATCCTTTCCCTTCC---TCT

>Megaderma_lyra

AAATAAACCTTAGCTATCATGCAGAGG-ACCATCAGA---AAAAGTCTAGGATG--------------------------

--------------------------------------------------------------------------------

--------------------------------------------------------------------------------

--------------------------------------------------------------------------------

--------------------------------------------------------------------------------

--------------------------------------------------------------------------------

--------------------------------------------------------------------------------

--------------------------------------------------------------------------------

--------------------------------------------------------------------------------

----------------------ACTTCATGATTCCCTCGGGATCCCAGAGTGCCAACAACACCTTCCCTTCTGG-TCT

>Equus_caballus

AAATCAACATGAGCTATCATGATGAGG-ATGATTATG---AGAAATGTAGAATG--------------------------

--------------------------------------------------------------------------------

--------------------------------------------------------------------------------

--------------------------------------------------------------------------------

--------------------------------------------------------------------------------

--------------------------------------------------------------------------------

--------------------------------------------------------------------------------

--------------------------------------------------------------------------------

--------------------------------------------------------------------------------

----------------------ACTTAATGATTATCTCAGGATTCCAGGGTGT---CAGCACTTTCCCTTCCAG-TCT

>Bos_taurus

AAACAAACATTTGCTATCATGATGAGG-ACGATTACT---GAAAATGTAAAATG--------------------------

--------------------------------------------------------------------------------

--------------------------------------------------------------------------------

--------------------------------------------------------------------------------

--------------------------------------------------------------------------------

--------------------------------------------------------------------------------

--------------------------------------------------------------------------------

--------------------------------------------------------------------------------

--------------------------------------------------------------------------------

----------------------ACTTAACGGCTATCTTGGGACCTTGGAGTGT---CAGCACTTTCCCTTCTGG-TCT

>Canis_familiaris

AAATAAACATTCGCTATCATGAGGGGGGATGATGATT---AAAAATGTAAAATG--------------------------

--------------------------------------------------------------------------------

--------------------------------------------------------------------------------

--------------------------------------------------------------------------------

--------------------------------------------------------------------------------

--------------------------------------------------------------------------------

--------------------------------------------------------------------------------

--------------------------------------------------------------------------------

--------------------------------------------------------------------------------

----------------------ACTTCATGATTATCTTGGGATCCCAGAGCGT---CAGCCCTTTCCCT-CTGG-TCT

**Marker Espe14_MLT**

>MLT1B

---------------------------------------------------------GACACACACAGAGGGAAGACCAT

GTGAAG-ACACAGGGAGAAGACGGCCATCTACAAGCCAAGGAGAGAGGCCTCAGAAGAAACCAACCCTGCC----GACAC

CTTGATCTCGGACTTCCAGCCTCCAGAACTGTGAGAAAATAAATTTCTGTTGTTTAAGCCACCCAGTCTGTGGTACTTTG

TTATGGCAGCCCTAGCAAACTAATACA-----------------------------------------------------

---------------

>Eonycteris_spelaea

CAAGTTCCCA-GTCATAGGATGATAACCTGATAACCTATTTAAAAA---CCTAT---GGATCGCACAAAGGAAAGGCCAT

GTGAGG---ACAGTGAGAAGGTG-----------GCCAAGGCAGGAGAATTCAGGAGAAACCAACCCTGCT----GATAC

CTTGATCTTGGACTTCTAACCTCCAGAAATATGAGAAA-TAAATTTTTTT------------------------------

----------ATTAGAAAAAAAG-------TCTAT---GG--ATGTCACCTCAGACA--TGTTTCTAAAAAAAGAAAAAT

AT---GTAGCAGAGA

>Pteropus_vampyrus

CAAGTTCCTA-GTCATAGGATGATAACCTGATAACCTATTTAAAAG---CCTAT---GGATAGCACAAAGGAAAGGCCAT

GTGAGG---ACAGTGAGAAGGTG-----------GCCAAGGCAGGAGAATTCAATAGAAACCAAACCTGCT----GATAT

CTTGATATTGGACTTTTAACCTCCAGAAATATGAGAAA-TAAATTTTTTTTTATT-------------------------

---------------AAAAAAAG-------TCTCT---GG--ATGTCACCTCAGACA--TGTTTCTGAAAAAAGAAAAAT

AT---GTAGAAGAGA

>Hipposideros_armiger

CAAGCTCTTA-----------GATAACCTGATAATCTATTTAAAAG---CCTAT---GGATTACACAAAGGAAAGGCCAT

GTGAGGGACATAGTCAGAAGGCGGCCATCTGCAAGCCAAGGCGAGAGGATTCAGGAGAAACCAAACCTGTCGATAGATAC

CTTGATCTTGGACTTCTAATCTCCAGAAATATGAGAAAATAAA---CATTTGTG--------------------------

----------ATTAAAAAAAGAG-------CCTAG---AG--ATGTCCTCTCAGACGTCTATTTCT-AAAAAAGAAAAAT

AT---GTGGAAGAGT

>Megaderma_lyra

CAAATTCTTA-GTCATAGGGTAATAACCTTACAATCTATTTAAAAG---CCTAT---GGATGACACAAAGGGAAAGCCAT

GTGAGG-ACACAGTGAGAAGGTGGCCATCTGCAAGCCAAGGCCAGAGGATTCAGGAGAAACCAAACCTGCC----AATAC

CTTGATCTTGGACTTCTAACCTCCAGAAATATGAGAAAACAAATTTTTGTT-----------------------------

----------ATAAGAAAAAAAT-------CCTAT---GG--ATGTCACTCCAGACATCTATTTCT-AAAAATAAAAAAT

AC---ATAGAAGAGA

>Desmodus_rotundus

CTAGTTCTCA-GTCACAGGATGATAGTCAGGTGACCTATCTAAAAG---CCATC--------------------------

--------------------------------------------------------------------------------

--------------------------------------------------------------------------------

--------------------------------------GG--GTGTCACCTCAGGTATCTACTTTGCAAAGAGGAAAAAC

ACTG-GTTGAAGAAA

>Miniopterus_natalensis

CCAGTTCTTA--TCATAGGATGATATCCTGATAACCTATTTAAAAG---CTATC--------------------------

--------------------------------------------------------------------------------

--------------------------------------------------------------------------------

--------------------------------------AG--ATGTCACCTCAGACATCTATTTTG-AAAAGGGGAAAAC

ATTTTGTTGAAGAAA

>Equus_caballus

CAAGTTCTTG-GTCATCGGATGATATCCTGATAATTTATTTGAAAG---CTATC--------------------------

--------------------------------------------------------------------------------

--------------------------------------------------------------------------------

--------------------------------------AG--ATGTCACCTCAGATATCTATTTCTCAAAAAGGAAGAAA

AATCTGTAGAAGAGA

>Bos_taurus

CAGGACCTGGGGTCA----------------------------GAG---CTGCC--------------------------

--------------------------------------------------------------------------------

--------------------------------------------------------------------------------

--------------------------------------GGGGACGTCGGCCCCAACCCCTGTCTTT-AGAAAGGAAGGAC

AGGCCGCAGAGGAGG

>Canis_familiaris

CAAGTCCTTAAGTCACAGGATGCTATCCTGATAACCTCTTGAAAAG---CTTTC--------------------------

--------------------------------------------------------------------------------

--------------------------------------------------------------------------------

--------------------------------------CG--ATGTTACTGCAGACACCTATTTCTAAAAAAGGAAGAAA

ACTACGTAGAGGATA

**Marker Harm1_MLT**

>MLT1A

------------------------------------------------------------------------------CT

ATGGACTGAATGTTTGTGT----CCCCCCAAAATTCATATGTTGAAGCCCTAATCCCCAATGTGATGGTATTAGGAGGTG

GGGCCTTTGGGAGGTGATTAGGATT--AGATGAGGTCATGAGGGCGGGGCCCTCATAATGGGATTAG--TGCCCTTATAA

AAGAGACCYCAGAGAGCTCCCTTGCCC--CTT--CCGCCATGTGAGGACACAGTGAGAAGGC-GC-CGTCTACGAACCAG

GGAATGAGCCCTCACCAGAAACTGAATCTGCCGGCGCCTTGATCTTG--GACTTCCCAGCCTCCAGAACTGT--------

--------------------------------------------------------------------------------

------------------------------

>Eonycteris_spelaea

GGCAAAAGACACC---------CCCCCCCAAAAAAAAAACCC-----------ACCAC--ACAATAAT---GCCC---CT

TAAAACTGAATGCTTGTGTTCT-------------------------CCCCAACCCCCAACATGATGGTATTTGGAGGCA

GGGCCTTTGGGAGGTAATCAGGTTT--AGATGAGGTCATGAGGGTGGAGTC-------------TAG--TCCCCTTATAA

GAAG------AGGGAGAGACCTGAACT--TCG--CTGACATGTGAGGATATAGTGAGAAGGCAGC-AGTCTGCAAACCTT

GATGTGGGCCCTCAC-AGGAACCCAATTTGCTAGCACATTGATTTTG--GACTTCCCAGCTTCCAGAACTGTGAAAA---

-ATTTCTG----TTAAGCCAAAAAAAAAAAAAAAAAAAAAAAAAAG---GCTC---CTCAGAGATAATCCCTGTTAACAT

TTTAAAAGGGATAAATCTATG----CAGAT

>Pteropus_vampyrus

GGCAA-----CCC---------CCCCGCCCCCCAAAAAAACCCC---------ATCAC--ACAATATT---GCTC-----

-AGAACTGAATGCTTGTGTTCT-------------------------CCCCAACCCTCAACATGATGGTATTTGGAGGCA

GGACCTTTGGGAGGTAATTAGGTTT--AGATGAGGTCATGAGGGTGGAGTC-------------TAG--TCCCCTTA-AA

GAAG------AGAGTGAGACCTGAGCT--CTGCTCTGACATGTGAGGATATAGCGAGAAGGCAGC-AGTCTGCAAACCTT

GATGTGGGCCCTCAC-AGGAATCCAATTTGCTAGCACATTGATTCTG--GACTTTCCAGCTTCCAGAACTGTGAAAA---

-ATTTCTGTTGTTTAAGCC------------AAAAAAAAAAAAAAG---GCTC---TTCAGAGATAATCCCTGTTAACAT

TTTAAAAGGGATAAATCTATG----CAGAT

>Hipposideros_armiger

GGCGAAAAGACCT---------CCCCCCCAAAAAAAGAAACCCCACAACCTCTACCAC--ACAGTATT---GCTC---CT

CAGAACTGAATGTGTTCCCTCTGCCACCCCTAATTCACATGTTGACGCCCCAGTCCCCAATGTGATGGTA-TTGGAGGTG

GGACCTTTGGGAGGTGATTAGGTTTAGAGATGAGGTCATGAGGGTGGAACCC------------TAGGATGTCCTTCT--

--------------------------------------CAAGTGAGGAGATAGTGAAAAGGCAGC-AGGCTGCAAACTCT

GATGTGGGCCCTTAC-GGGAGCCCAATTTGCCAGCACACTGATCTTG--GATTTCCCAGCCTCCA-AACTGTGAAAAACA

TATTTCTGTTGTTTAAGCC------AAAAAAAAAAAACAACACAAA---ACAC---TCCTACGATAATCCCTGTTAACAT

TTTAAAAGGGATAAATCTATC----CACAT

>Megaderma_lyra

GGCAAAAGGAACCAAACTGCCACCCTCCCAACAAAAAAAACCTC---------ACCAC--TCCATATT---GCTT---TT

CAGAACTGAGTGTATTTCCCCTTCTACTCCCAACTCATATATTGAAACCTCACTCCCCAGGGTGATGGAATTTGGAGGTG

GGACCTTTGG-AAGT-ATTAGGTTT--AGATGAGGTCTTGGGGGCGGAGTCCCTATGATGGGATTAG--TGCCCTTAT--

GAG-------AGGGAGAAACCAGAGCTTGCCCCTCTGACAAGTG-TCTTACAGTGAGAGGGCAGCAAGTCTGCAAACACT

GATATGGGCCCC--C-AGGAACCCACTCTGCCAGCACACTGATCCTGCATATTTTCCAGCCTCCAAAA-TATG-------

--------------------------------------------------------------------------------

---GAGGGGGATAAATCTACC----CAGAT

>Desmodus_rotundus

GGTAAAAAGA--------------------ATAAAAGAAA--------------------ATAATATT---GCTC-----

--------------------------------------------------------------------------------

--------------------------------------------------------------------------------

--------------------------------------------------------------------------------

--------------------------------------------------------------------------------

---------------------------------------------------------TCAGAGATAATTTCTGTTAACAT

TTTAAAAGGGGTAAATCTACA----TATTT

>Myotis_brandtii

GGCAAAAAGAACC-----------------AAAGAAAAAAC------------ATAAC--ACAATATT---GTTC-----

--------------------------------------------------------------------------------

--------------------------------------------------------------------------------

--------------------------------------------------------------------------------

--------------------------------------------------------------------------------

--------------------------------------------------------CTCAGAGATGATCCCTGTTAGCAT

TTTAAAAGGGATAAATCCATC----CAGAT

>Equus_caballus

CACAAAAAGAACC---------CCCCAAAAAAAACAGAAACAAAAAAA-----CACCC--TTAATGTT---GCTC-----

--------------------------------------------------------------------------------

--------------------------------------------------------------------------------

--------------------------------------------------------------------------------

--------------------------------------------------------------------------------

--------------------------------------------------------CTCAGAGATAATATCTGTTAACAT

TTT----GGGATAAATCTTTCCAGATCTAT

>Bos_taurus

GGCAAAAAGACCC-----------------AAAACAGAAGGCAAA--------GCCACTTCTAATATT---GCTC-----

--------------------------------------------------------------------------------

--------------------------------------------------------------------------------

--------------------------------------------------------------------------------

--------------------------------------------------------------------------------

--------------------------------------------------------CTCAGAGATAATTCCTGTTAATAT

TTT----GGGATAAATCTTTCCTTCCAGAT

>Canis_familiaris1

GACAAAAAGAACC-----------------AAAACTACAACAACAA-------ACCCC--CCT---GT---GCTC-----

--------------------------------------------------------------------------------

--------------------------------------------------------------------------------

--------------------------------------------------------------------------------

--------------------------------------------------------------------------------

--------------------------------------------------------CTCACTGATAGT--CTGTTAACAT

TTT----GGGATAAATCTTTC----TATAT

>Canis_familiaris2

GACAAAAAGAACC-----------------AAAACTACACAAACAA-------ACCCC--CCT---GT---GCTC-----

--------------------------------------------------------------------------------

--------------------------------------------------------------------------------

--------------------------------------------------------------------------------

--------------------------------------------------------------------------------

--------------------------------------------------------CTCACTGATAGT--CTGTTAACAT

TTT----GGGATAAATCTTTC----TATAT

**Marker Harm2_MLT**

>MLT1A0

---------------------------------------------------------CTCC--CTTGCCC----CTTCCG

CCATGTGAGGACACAGTGAGAAGGCGCCGTCTACGAACCAGGGAATGAGCCCTCACCAGAAACTGAATCTGCCGGCGCCT

TGATCTTGGACTTCCCAGCCTCCAGAACTGTGAGAAATAAATTTCTGTTGTTTAAGCTACCCAGTCTATGGTATTTTGTT

A-----------------------------------------------------------------

>Eonycteris_spelaea

TGCGGC-CAGTATCCTACAATACACAGGGCAGCCTCGCACAATAAA---GAATT---CTCC----TGCCCACCCCTTCCA

CCATGTGGGGAGAC---------AAGAAGTCTGTG-ACTTGGAAGAGGG-CCTCAT------CTGACTGTGCTGGCACCC

TGATCTTGGACTTCC-AGCCACCAGAACTATGAGGAATATATTAGTATAATTTATTTTTTA----------------AAA

A---GAATT---CTCCTGCCCCAAATGTCAATAGTGCCGAAGTTGGGAAAACCTAC----ACTGGT

>Pteropus_vampyrus

TGGTGCTAGACATCCTACAATACACAGCGCAGCCTCCCACAGTAAA---GAATT---CTCC----TGCCCACCCTTTCCA

CCATGTGGGGAGAC---------AAGAAGTCTGTG-ACCTGGAAGAGGGCCCTCAT------CTGACTGTGCTGGCACCC

TGATCTTGGACTTCC-AGGCTCCAGAACTATGAGAAATATATTAGTATA---TATTTTATATATATTAGTATATATTTAA

A---AAATT---CTCCTGCCCCAAATGTCAATAGTGCTGAAGTTGAGAAAACCTAC----ACTTGT

>Hipposideros_armiger

TGGTGCTAAACATCCTACAATACACATGGCCATTTCCCACAATAAA---GAATC---CTCCTTCCTGCCCACCTCTTCCA

TTAAGTGAGGATAT---------GCAACGTTTGTG-ACCTGGAAGAGGGCCCTCAC------CTGACCATGCTGGCACCT

TGATCT---------------CCAGAACTGTGAGAAATAAGTTACTATTATTTATTTT-------------------TAA

A---AATCA---CTCCTGCCCAAAATGTCGATAGTGCAGAAGTTGAGAAACCCTAC----ACTAGT

>Megaderma_lyra

TAGTGCTAAACATCCTGCAATACACAGGGCAACTTCCCACAATTAA---GAATT---CTCC----TGTCCACCTCTTTAA

TTATGTGAGGATAT---------GCGTCATCTGTG-ACCTGGAAAAGTGCCCTGAC------CTGAC-ATATTAGCACCC

TGATCTTGGACTTCT-AGCCTTCAGAACTACAAGAAATAATTTACTGTTATTTTTTTTTTAAT-----------------

------------TGCCTGCCCAAAATGTCAATAGCTCAAAAGTTGAGAAACCTTAC----ATTAGT

>Desmodus_rotundus

TGCCGC-AAATATTCTTCAGTACACAGCGTAGCCTCCCACAATGAA---GAATT--------------------------

--------------------------------------------------------------------------------

--------------------------------------------------------------------------------

------------CTCCTGCCCAATATGCCAACAGGGCAGAAGTTGAGAAACCCTAC----ATTAGT

>Myotis_brandtii

TGCTGC-AAATATCCTGCAATACACAGGGCAGCCTCCCACAATGAA---GAATT--------------------------

--------------------------------------------------------------------------------

--------------------------------------------------------------------------------

------------CTCCTACCCAGAAGGTCAACAGTGTCGAAGTTGAGAAACCTTAC----ACTAGT

>Tapirus_terrestris1

TGCTGCTAAACATCCTACCATACACAGGGCAACCTCCCATAATAAA---GAATT--------------------------

--------------------------------------------------------------------------------

--------------------------------------------------------------------------------

------------CTCTTGCCCAAAATGTCAAGAGTACAGAGGTCGAGAAACCCTGC----ACTAGT

>Tapirus_terrestris2

TGCTGCTAAACATCCTACCATACACAGGGCAACCTCCCATAATAAA---GAATT--------------------------

--------------------------------------------------------------------------------

--------------------------------------------------------------------------------

------------CTCTTGCCCAAAATGTCAAGAGTACAGAGGTCGAGAAACCCTGC----ACTAGT

>Balaenoptera_acutorostrata_scammoni

TGCTGCTCAACGTCCTACAGTACACAGGACAGCT--CCACAGTAAA---GAATT--------------------------

--------------------------------------------------------------------------------

--------------------------------------------------------------------------------

------------CTCCTGCCC-AAATGTCAGTAGTGC--AGGTTCAGAAACCCTGCAGTAACTAGT

>Felis_catus

AGCTGCTAAACA----ATAATGCGAAGGACCGCCTCCCACAATGAA---GAATT--------------------------

--------------------------------------------------------------------------------

--------------------------------------------------------------------------------

------------CTCCTGCCCCAAATGTCCATTGCGC-AAAGTTGAAAATTCCTAT----GTTAGT

**Marker Harm3_MLT**

>MLT1A

-----------------------------------------------------------ATTAGGAGGTGGGGCCTTTGG

GAGGTGATTAGGATTAGATGAGGTCATGAGGGCGGGGCCCTCATAATGGGATTAGTGCCCTT---ATAAAAGAGACCYCA

GAGAGCTCCCTTGCCCCTTCCGCCATGTGAGGACACAGTGAGAAGGCG-CCGTCTACGAACCAGGGAATGAGCCCTCACC

AGAAACTGAATCTGCCGGCGCCTTGATCTTGGACTTCCCAGCCTCC-AGAACTGT-------------------------

------------------------------------------------------------------------------

>Eonycteris_spelaea

CTTTGAAATGTATTGTGTCATATATTTTATTTTATTTTTAAAAATT------TTAG---ATTTGGAGATGGGGT-TTTGG

GAGATGATTAGGATTAGATTGGATCATTATGGTAGAGACCTCATGATGGATTTAATGCCCTTAAAAAGAAAGGGACATAA

GAGTTCTCTCT--CTTTCTCCACTGTATGAAGATACAGCAAGAAGCTGGTCATCTATAAGCCAGGAAGAAAGTCCTCAGC

TGATGCCAAATTGGCCAGCTACTTGATCTTGGATTTCCCAGATTCC-AAAAGTGTGAGAAATAAAGATTTATTATGAAAT

TTTTAAAA---------ATAG---GTACTATGGCTTCATTCTAAAGA---TTATT-GAAACATTTTAAATTAAACCTT

>Pteropus_vampyrus

CCTTGAAATGTATTGTGTCATATATTTTATTTTATTTTTAAAAATT------TTAG---ATTTGGAGATGGGGC-TTTGG

GAGATGATTAGGATTAGATTAGATCATTAGGGTAGAGATCTCGTGATGGGTTTAGTGCCCTTAAAAAGAAAAGGACATAA

GAGTTCTCTCTCTCTCTCTCTACCGTATGAGGATGCAGCAAGAAGCTGGTCATCTATAAGCCAGGAAGAAAGTCCTCATC

TGATGTCAAATTGGCCAGCTACTTGATTTTGGACTTCTCAGATTCC-AAAAGTGTGAGAAATAAAGATTTATTATAAAAT

TAAAAAA----------ATAG---GTACTATGGCTTCATTCTAAAAA---TTATT-AAAACGTTTTAAATTAAACCTT

>Hipposideros_armiger

CCTTGAAATGTGTTGTGTCTCACATTTTCTT-----TTAAAAAAAT---ACATTAG---TTTTGTAGATGGAGT-TTTGG

GAGGTAATTAGGGTTAGATTAAATC-TAAGAGTAGAGACCTCATGATGGATATAGTGCCCTTGACAAGAAAGGGATATGA

GCGTTCTCTCT----TTCTTCACTGCATGAGGATACAGCAAGAGGCTGTCCATTTGCAAGCCCGGAGGAAGGTCCTTTCC

AGATACCGTATTGGCCAGCTACTTGATCTTGGACTTCTCAGATTCT-GGAAGTATGAGATATAAATGTTTGTTGTATAAT

TAAAAAGAAGAAAA---GAAG---GTGCCATGGTTTCATTCTAAAGGTCCTTATT-AAAAGGTTTTTAATGAGACCTT

>Megaderma_lyra

ACTTGAAATATGTTATGACTCACATTTTATT-----TAAAAAAAAT-------TAG---ATATGGAGATAGAGC-TTTGT

GGGATAATTAGGGTTAGATTAAATTATAAGGGTGAAATCCTCATGTTGAATTTAGTGCCCTTAAAATGAAAGGGATATGA

GAGTTCTCTCT--------TCACTGTATGAAAATACAGCAAGAAGTCGGTCATCTGCAAGCCGGGAAGAACGCCCTTACC

AGACACCAAATTGACCAGCTACTTGACCTTGGACTTTTCAGATTCTGAAAAGTGTGAGATATAAATGTTTGTTGTATAAT

TTAAAAAA---------ATAG---GTACCATGGATCCATTCTAAAGATCCTTATT-AAAAGGTGTTAACTGAGACCAT

>Desmodus_rotundus

CCTTGAAATGTGTTGTGCCTCTCATTTTATT-----TTAAAATATT------TTAG------------------------

--------------------------------------------------------------------------------

--------------------------------------------------------------------------------

--------------------------------------------------------------------------------

------------------------GTACCATGGCCTCATTCTAAAAACTCATATT-AAAATGTTTCCAATGAGATCAT

>Miniopterus_natalensis

TCTTGAAGTGT--TGTGCCTCACATTTTATTTTATTTTAAAATATT------TTAG------------------------

--------------------------------------------------------------------------------

--------------------------------------------------------------------------------

--------------------------------------------------------------------------------

------------------------GTACTGTGGGCTTATTCTAAACATTCCTATT-AAAAGGTTTTAAATGAGATCTT

>Equus_caballus

GCTCGAAATGTGTTGTGCCTCACATTCTATTTCGTTTTTTAAAATT------TTAG------------------------

--------------------------------------------------------------------------------

--------------------------------------------------------------------------------

--------------------------------------------------------------------------------

------------------------GTAC-ATGGTCTCATTCTAAAGATTCTTATTTAAAAAGTGTTGTATGAGACCTC

>Bos_taurus

CCTTGAAATCTGTTGTGCCTCACATTTTACTTTA--TTTAATTTTT------TAAG------------------------

--------------------------------------------------------------------------------

--------------------------------------------------------------------------------

--------------------------------------------------------------------------------

------------------------GTTTCTTGTTCTTCTTGTAAATATTCTTATTTAAAAGATTTTGGATGAGACCTT

>Manis_pentadactyla

CCTTGAAATGTGTTGTGCCTCACATTTTACTTAGATTTTAAAAACT------TTAG------------------------

--------------------------------------------------------------------------------

--------------------------------------------------------------------------------

--------------------------------------------------------------------------------

------------------------TTACCATAGTTTTATTCTAAAGATTCTTATTTTAAAAGTTTTGGATGAGACCTC

**Marker Harm5_MLT**

>MLT1A0

--------------------------------------------------------------------------------

---------CCCTAATCCCCAATGTGATGGTATTAGGAGGTGGGGCCTTTGGGAGGTGATTAGGATTAGATGAGGTCATG

AGGGCGGGGCCCTCAT-AAT-GGGATTAGTGCCCTTATAAAAGAGACCYCAGAGAGCTCCCTTGCCCCTTCCGCCATGTG

AGGACACAGTGAGAAGGC-GCCGTCTACGAACCAGGGAATGAGCCCTCACCAGAAACTGAATCTGCCGGCGCCTTGATCT

TGGACTTCCCAGCCTCCAGAACTGTGAGAAATAAATTTCTGTTGTTT--AAGC-TACCCA--------------------

-----------------------------------------------------------

>Eonycteris_spelaea

AGCCAAGTTTTAAT------ATAATTACTATGAGG------------------AGGAATGGT-AACG-------TCA---

-AAATG----CCTAATCACCAAATACTAAATA-TTGGAGGT-GGGCCTTTGGGAGGTG-----------GTGTGGTCACG

AGGATGGCG-TCTGATGAAC-GGGATTGGTGCTCTTATAAAAGGGACCCCTGAGAAATCCCTCGCCTCTCCCACCACGTG

ACAACGCAGCAAGAACATGGCTGTCTCTGAGCCAGGAAGTGGGCTTTCACCAGACACTGAATTTGCCAGTGGCCTGATCA

CGGACTT---GGTCTCCGAAACGGTGAGAAATACACTTCTGTTGTTTAAAAGCCTCCCCC--------------------

-AAACG---CCTTCATAAAAATGCATAAGAATTACAGCTATATCCAATATATGGATGAA

>Pteropus_vampyrus

ATCCAAGTTTTATT------ATAATTCCTACGGGG------------------AAGAATGGT-AACGCCTTTCTTCA---

-AAATG----CCTAATCACCAAATACTAAATG-TCGGAGAT-GGGCCTTTGGGAGGTG-----------GTGAGGTCATG

AGGATGGCG-CCTGATGAATGGGGATTAGTGCTCTTATAAAAGGGACCCCAGAGAAATCCCTCGCCTCTTCCACCATGTG

ATGACACGGCAAGAAGATGGCTCTCTCTGGACCAGGAAGTGGGCTTTCACCAGACGCTGAATTTGACAGTGGCCTGATCA

TGGACTC---GGCCTCCAAAACTGTGAGAAATACACTTTTGTTGTTTAAAAGCCTTCCCC--------------------

-AAAAG---CCTTAATCGAAATGCGTAAGAATTATAGCTATATCCAATATATGGATGAA

>Hipposideros_armiger

ATCCAGGTTTTATC------ACCATTACTATGAGGACCA----ATATCTTTGAAAGAATAGTTAACA-------GCA---

-AGATG---ACTTAATCACCAACTACCAAATA----------------TTAGGAGGTG-----------CTTAGGTCATG

AGGATGGAGTCCTGATGAAC-GGGATCAGTGCCCTTATAAA------CCCAGACAGTTCCCTCGTCCCTTTCCCCATGTG

AGGACACAGCAAGAAGATGGCTGTCTGTGAACCAGGAAGTGGG-------------CTGAATCTGCCAGGGCCTTGATCG

TGTGCTT---AGACTCCAAAACTGTGAGGAATACATTTCTGCTGTTTATAAGC--AAAC---------------AAGA--

-AATTA---CCTTAATCAAAATACAT-AAAATTACAGCTACATCCAAAATATGGAGGTA

>Megaderma_lyra

ATCCAGTTTTTATT------ACAATTACTAGAAAGATAA----ATATTTTTGAAAGAACATT-AACA-------TCA---

-AGATG---ACTTCATTACTAAATGCCTAATATTTGGAGGTAAGGCCATTGCAGGGTGGTTA-------GTTAGGTCATG

AGGACAGAGCCCTGACGAAT-GGGATTACTGCCCTTATAAA-GAGACTCCAGGGAAAGTTCTTGTCCCTTCCGCCATGTG

AGGACACAGCAAGAA---GGCCATCTATGAACCAGGAAGTGGGCTCTCACCAGGCCCTGAATGTGCTGGTGCTTTGATTG

TGCAC-----AGCCTCTAAAACTGCGAGGAATAAATTTCCGTTGTTTGTAAGCCAAAACCAAAACCAAACAAAAAAAA--

-AAAAA---CCTTAATCAAAATGCATTAAAATTACAGCTATATCCCAAACACAGATGAA

>Desmodus_rotundus

GTCCAGGTTTTATT------ACGATTACCACGAGGACAA----ATATTTTTGAAAGACAGAT-AACA-------TCA---

-AAATG--------------------------------------------------------------------------

--------------------------------------------------------------------------------

--------------------------------------------------------------------------------

--------------------------------------------------------------------------------

---------CTTTGATCAAAATGTACTCAAGTTATAGCTATGTCCAAAATATGGACAAT

>Myotis_brandtii

GCCCAGGTTT-----------CAATTACCATGAGGACAA----ATATTTTTGAAAGAAAGGT-GACA-------TCA---

-AACTG--------------------------------------------------------------------------

--------------------------------------------------------------------------------

--------------------------------------------------------------------------------

--------------------------------------------------------------------------------

---------CCTCAATCAAAATGTATTAAAATTATATCTATATCCAAAATATGGATGAT

>Equus_caballus

ATCCAGGTTTTATT------ACAATCATTATGAGGACAA----ATATTTCTGAAAGAAAAGT-AACA-------TCA---

AAAACA--------------------------------------------------------------------------

--------------------------------------------------------------------------------

--------------------------------------------------------------------------------

--------------------------------------------------------------------------------

---------CCTTAATCAAAATGAATTCAAATTATAGCTATATCCAAAATATGGATGAA

>Bos_taurus

ATCCAGGTTTTATTATTAAAACAACCATTATAAGGACAAGCAAATATTTTTGAAAGAAAA--------------TTA---

-AGATG--------------------------------------------------------------------------

--------------------------------------------------------------------------------

--------------------------------------------------------------------------------

--------------------------------------------------------------------------------

---------CCTTCA-AAAAATATATT-AAATTATATGTA-ATTCAAAATATG----CA

>Canis_familiaris

ATCCAGGTTT-ACT------ACAATCTCT-TGGGTATAAAC--ATATTTTTGAAAAAAAGGTTAACA-------TCA---

-AAATG--------------------------------------------------------------------------

--------------------------------------------------------------------------------

--------------------------------------------------------------------------------

--------------------------------------------------------------------------------

---------CCTTAATCCAAATGTGCT-AAATTATAGCTGTATCTAAAATATGGATGAA

**Marker Harm6_MLT**

>MLT1A0

--------------------------------------------------------------TCCCTTGCCCCTTCCGCC

ATGTGAGGACACAGTGAGAAGGCGCCGTCTACGAACCAGGGAATGAGCCCTCACCAGAAACTGAATCTGCCGGCGCCTTG

ATCTTGGACTTCCCAGCCTCCAGAACTGTGAGAAATAAATTTCTGTTGTTTAAGCTACCCAGTCTATGGTATTTTGTTAT

AGCAGCCC---AGACA-------------------------------------------------------------

>Eonycteris_spelaea

ACTT-AATCTTTGAGCTTTCATTTAAAATA--ACAT--TTGTAGAAA-TCC---ATAGG---GGCCTTG--CCTTGCACC

CTATGAGGATGCAAT--AAAG------TCTGTGA-------------------------------CCTGCTGGCACCCTG

ATCTTAGGCTTC-GAGCCTCTAGAAGTATG-GAAATAAATACTCATTGTTTA--------------------AAAAAAAA

AAAAGTCC---ACATG---AGGAGGCTACTTTGCATCTGGA--------GAACCACAGAACGTGGAGGCCAGCTTCA

>Pteropus_vampyrus

ACTT-AATCTTTGATCTTCCATTTAAAATA--ACGT--TTGTAGAAA-TCC---ATATG---GGCCTTG--CCTTGCACC

CTATGAGGATACAAT--AAAG------TCTGTGA-------------------------------CCTGCTGGCACCTTG

ATCTTAGGCTTC-CAGCCTCTAGAAGTATG-GAAATAAATACCCATTGTTAA-------------CTGGAAAAAAAAAAA

AAAAGTCC---ACATG---ATGAGACTGCTTTGTATCTGGA--------GAGCCACAGAACATGGAGGCCAGCTTTA

>Hipposideros_armiger

ACTT-AATCTTTGATCTTCCATTTAAAATC--ATGTGTTTATAGAAAATCC---ATATG---GGGCTTG--CCTTGAATC

ATGTGAGGTTTCAATGAAAAG------CCTGTGA-CCTGGAAGAGGGCCCTCACT------CAGCCATGCTGGCATCCCG

ATCTTAGACTTC-CAGCCTCTAGAGCTGTG-GAAATACATTTCTGTTGTTTA-----------------TACGTACATAT

GAAAATCC---ACACA---ATGAGGCTGCCTTGCATCTGGA--------GAGCCACAGAACATGAAGGCCAGATACC

>Megaderma_lyra

ACTT-AATATTTGATCTTCCATTTAAAATG--ATGTGTTTACAGAAA-TCC---ATATG---GGCCTTG--CCTTGTGCC

ATTTGAGGATACAGTGAAAAG------TCTGTGA-CCTGAAAGAGCACCCTCACT------CAACCATCCTGGCACTCTG

ATCTTAAATTTC-CAACCTCTAGAACTGTG-GAAATAAATTGTTGTTGCGTA---------------------TAAATAA

AAGAATCC---ATATG---ATGAGGCTGCTTTGCGTCTGGA---------AGCCACAGAACATGAAGGCCAGCTATA

>Desmodus_rotundus

ACTT-AATCTTTGATCTTCCACTTAAAATA--ATGTGTTTACAGAAA-TCC---CTATG---------------------

--------------------------------------------------------------------------------

--------------------------------------------------------------------------------

-------------------CTGAGGCTGCTTCACACCTGGA--------CAGCCACAGAGCATGAATGCCAGCTACA

>Myotis_brandtii

GCTT-AATCCTTGATCTTCCATTTAAAATA--ATGTGTTGATAGACA-TCC---ATATG---------------------

--------------------------------------------------------------------------------

--------------------------------------------------------------------------------

-------------------ATGAGGCTGCTTTGTATCTGGA--------GAGCCACAGAACATGAAGGCCTGCTAAA

>Equus_caballus

ATTT-AATCTTTGATCTTCCATTTAAAATA--ACG---TCATAGAAA-TCC---ACCTG---------------------

--------------------------------------------------------------------------------

--------------------------------------------------------------------------------

-------------------ATGAGGCTGCTTTGCATCCAGA--------GAGCTACCAGACATGCAGGCCAGCTGCG

>Bos_taurus

GTTTTAACCTTTGATCTTCCACTTAAAATATTATGTGTCTACAGAAA-CCC---ATA-----------------------

--------------------------------------------------------------------------------

--------------------------------------------------------------------------------

-------------------ATAAGACTATTTTGCATCTGGAAAGCCACAGAGCCACAGAACATGAAGGCCAGCTGCA

>Canis_familiaris

ATTT-AATCTCTGATCTTTCATTTAAAATA--ATGCATTTATAGAAA-TCC---ACATG---------------------

--------------------------------------------------------------------------------

--------------------------------------------------------------------------------

-------------------ATGAGGCTGCTTTGTATTTG-A--------GAGCCACAGAACATAAAGGCCAACTGTT

**Marker Harm9_MLT**

>MLT1A0

--------------------------------------------------------------------------------

--------------------------------------------------------------------------------

--------------------------------------------------------------------------------

--------------------------------------------------------------------------------

--------------------------------------------------------------------------------

--------------------------------------------------------------------------------

--------------------------------------------------------------------------------

-ACCYCAGAGAGCTCCCTTGCCCCTTCC--GCCATGTGAGGACACAGTGAGAAGG----CGCCGTCTACGAACCAGGGAA

TGAGCCCTCACCAGAAACTGAATCTGCCGGCGCCTTGATCTTGGACTTCCCAGCCTCCAGAACTGTGAGAAATAAATTTC

TGTTG-TTTAAGCTACCCAGTCTATGGTATTTTGTTATAGCAGCCCGAACAGACTAAGACA-------------------

--------------------------------------------------------------------------------

-----

>Eonycteris_spelaea

GATGCTCTTGTTTTTAGGGACTAAT-GCGATCCT----------------------------------------------

--------------------------------------------------------------------------------

--------------------------------------------------------------------------------

--------------------------------------------------------------------------------

--------------------------------------------------------------------------------

--------------------------------------------------------------------------------

-------------------------------------------------------ACAT---GTTTCATT---AGAAA--

-CCTCCAGAAAGCCTTTTTTTTTTTTTTTTGCCTTGTGAGGACACAATGAGAAAAAGACTGCCATCTACAAACCAGGAAG

TGGGCTCTCACCAAACACAGATTCTGCCCGCCCCTTGATCTTGGACCTCCCAATCTCTAGAACTGTTAGCAATACACGTT

TGCTGTTTAAAGCCGAAAGAAAAAAAAAAAAAAAAAGAGGGGGCGG-----AAGAAAGAGCGGATGGAGGGAGGGAGAAA

CG----------TGAAA-AAG---AAAAG---CCTTCA---GAGATTTCACAAACCCCACTGAGGAATTCTGTTCAAATA

TATTC

>Pteropus_vampyrus

GATACTCTTCTTTTTAGAGACTAAC-ACGATCCT----------------------------------------------

--------------------------------------------------------------------------------

--------------------------------------------------------------------------------

--------------------------------------------------------------------------------

--------------------------------------------------------------------------------

--------------------------------------------------------------------------------

-------------------------------------------------------ACA----------TT---AGAAA--

-CCTCCAGAAAACCTTTTCT----------GCCATGTGAGGACACAATGAGAAAAAGACTGCCATCTACAAACCAGAAAG

TGGGCTCTCACCAAACACAGATTCTGCCTGCACCTTGATCTTGGACCTCCCAGCCTCTAGAACTATGAGCAATACATGTT

TGCTGTTTTAGTTTAAAAAAAAAAAAAAAAGCGGGGGAGGGGGTGGGTGGAAAGAAAGAGAGGATGGAGGGAGGGAGAAA

GGATGGAAGGAAGGAAA-AAA---AAAAG---CCTTCA---GAGATTTCACAAA-CCGACTGAGGAATTCTGTTCAA--A

TATTC

>Hipposideros_armiger

GATGTGCTTCTTTTTAGGGACTGAT-GCGATCCT----------------------------------------------

--------------------------------------------------------------------------------

--------------------------------------------------------------------------------

--------------------------------------------------------------------------------

--------------------------------------------------------------------------------

--------------------------------------------------------------------------------

-------------------------------------------------------ACAG---TGTTCATT---AGAAA--

-CCTCCAGAGAGCCTTTTTC----------GTCATGTGAGGACACAGTGAGGAAAAGATCTCCATCTACAAACAAGGAAG

TGGA-TCTCACCAGACACAGAATCTGCCTGTGCCTTGAGGTTGGGCTTC-CAGCCTCTAGAATGGTGAGAAATAAATATT

TGCTGTTTTAAGCC----------------------------------------AGAAATGGAAAGAAGGGAGGG-----

------------------------AGAAA---CCTCCA---GAGATTTTACAAA-CCTACTGAGGAATTCTGTTCAA--A

TGCTC

>Megaderma_lyra

GTTGCTCTTCTTTTTAGGGGCTGATAATGATCCT----------------------------------------------

--------------------------------------------------------------------------------

--------------------------------------------------------------------------------

--------------------------------------------------------------------------------

--------------------------------------------------------------------------------

--------------------------------------------------------------------------------

-------------------------------------------------------GCAT---TGCTTATT---AGAAA--

-CCT-CAGAGAGTCTCTTCT----------GCCATGTGAGGACACAGTGAGAAAAAGTTCACTATCTACAAACCAGGAAG

TGGGCTCTCACCAAACACAGAATCTACCTGCACCTTGACCTTTGATTTTTCAG---------------------------

-------------GAAGGAGCGGGGGAGGGAGGGAGGGAGGGAGGGAAGGAAGGAAGGAAGGAAGGAAGGAAGGAAGGAA

GGAAGGAAGGAAGGAAGGAAG---GAAAA---CCTCCA---GAGATTTCACAAA-CTTACTGCGGAATTCTGTTCAA--A

TGTTC

>Desmodus_rotundus

AATACTCTTCTTTTTGGGGG-TGAT-GTGATCCC----------------------------------------------

--------------------------------------------------------------------------------

--------------------------------------------------------------------------------

--------------------------------------------------------------------------------

--------------------------------------------------------------------------------

--------------------------------------------------------------------------------

-------------------------------------------------------ACAT---TGGTCATT---AGAAA--

--------------------------------------------------------------------------------

--------------------------------------------------------------------------------

--------------------------------------------------------------------------------

--------------------------------CCTCCA---GAGATTTCACAAA-CCGACTGAGGAGTTCTGTTCAT--A

TAGTC

>Myotis_brandtii

GATAGTCTTCCTTTTAGGGGCTGAT-TTTATCCT----------------------------------------------

--------------------------------------------------------------------------------

--------------------------------------------------------------------------------

--------------------------------------------------------------------------------

--------------------------------------------------------------------------------

--------------------------------------------------------------------------------

-------------------------------------------------------ACAT---TGTTC-TT---AGAAA--

--------------------------------------------------------------------------------

--------------------------------------------------------------------------------

--------------------------------------------------------------------------------

--------------------------------CTTCTA---GAGCTTTCACAAA-CCTACTGAGGAATTCTGTTCAA--A

TAGTC

>Equus_caballus

TATAATCCTTCCTTGAACAACTGGT-GGGATCCT----------------------------------------------

--------------------------------------------------------------------------------

--------------------------------------------------------------------------------

--------------------------------------------------------------------------------

--------------------------------------------------------------------------------

--------------------------------------------------------------------------------

-------------------------------------------------------ACAG---TGTTCATT---AGAAA--

--------------------------------------------------------------------------------

--------------------------------------------------------------------------------

--------------------------------------------------------------------------------

--------------------------------CCTCCAGAGGAGTTTTCACAAA-TCTATTTAGGAATTCTCTTCAA--A

TATTC

>Vicugna_pacos

GACAGTCCCCCCTTATGGGGCTGAT-GCAATCCTATTATAACTGAGTGGGACCCCAGGGGGCCTTCTGGGGACAGACCCC

TCCCCCCATGTCCTCTGCTTATAGCTCCTCTCTGAAGTAGCTGGATAGTAGTATCTGATACACATTGCCTGAATTTTACA

GATGATAAAACCCACACCAAATGGAAGAAATTAACCACTTGATAACTAAGAGCACTTAACTCCCAGACCTCCTGGCACCT

AAGGACTGATAATGTTAACCCCTGTGACACCACCCTGCTACCTCTCCATCAACTGATCAGAGAATTGTGCACGAGCTGAT

CACAGGCCCTGGGACACCCCCACCTTCTGCCCCACTGCCTCTAAATAATGCTCTCCTGAAACCCATCGGGGAGTTTGGCT

GTTTTCAGCACTAGCTGTCCTGGACCCCTTGCTTGGAGCCCCGCAATAAACACTACACTTGCCTTCACCACAACCCGGTG

TCAGAAGATTGGCTTTACTGCGCTTGGGTGAGGGGGGCAAGTTGGGTTCAGTAACACTCTGTTGTTCATT---AGAAA--

--------------------------------------------------------------------------------

--------------------------------------------------------------------------------

--------------------------------------------------------------------------------

--------------------------------CCTC-AGGGGAGGTTTTGCAAA-CCTACTGAGGAATTCTGTTCAA--A

TATTC

>Canis_familiaris

GATA-----CTCTTGAGAGAGTGTT-GCGATCCT----------------------------------------------

--------------------------------------------------------------------------------

--------------------------------------------------------------------------------

--------------------------------------------------------------------------------

--------------------------------------------------------------------------------

--------------------------------------------------------------------------------

-------------------------------------------------------ACAC---TGTTCATT---AGAAA--

--------------------------------------------------------------------------------

--------------------------------------------------------------------------------

--------------------------------------------------------------------------------

--------------------------------CCTCCAGAGGAGATTTCACAAA-CCTACAGAGGAATTCTGTTCAA--A

CAGTC
