# Supplementary material for: The multicomparative 2-n-way genome suite
Source: HighWire-hosted journal article supplement (doi:10.1101/gr.262261.120), 2020-07-29
Supplement: SupplementalDataS3.docx [file SupplementalDataS3.docx]

**Alignments for Example 5**

**Incomplete lineage sorting at the root of the whale tree**

**Marker TP4**

>CHR-2

--------------------------------------------------------GGGCTTCCCTGGTGGCGCAGTGGT

TAAGAATCTGCCTGCCAATGCAGGGGACACGGGTTCGAGCCCTGGTCCGGGAAGATCCCACATGCCGCGGAGCAACTAAG

CCCNTGCGCCACAACTACTGAGCCTGCGCTCTAGAGCCCGCGAGCCACAACTACTGAGCC-------------CGCGTGC

CACAACTACTGAAGCCCACGTGCCTAGAGCCTGTGCTCCGCAACAAGAGAAGCCACCGCAATGAGAAGCCCGNGCACCGC

AACGAAGAGTAGCCCCCNCTTGCCGCAACTAGAGAAAGCCCGCGCNCAGCAACGAAGACCCAACGCAGCC----------

--------------------------------------------------------------------------------

-----------------------

>Tursiops_truncatus

ATAACAGCTGCCTTGCTGACCTCACAGGGTTGTGTC---AAGACTGAATTAGA---GGGCTTCCCTGGTGGTGCTGTGGT

TAAGAACCCGCCTGCCAATGCAGGGGACACGGGCTCGAGCCCTGGTCCGGGAAGATCCCACATGCCGCAGAGCAACTAAG

CCCGCGTGCCACAACTT-CGAGCTTGCGCTCTAGAGCTCGCGAGCCACAACTACTGAGCC--------------------

----------------CGTGTGCCTAGAGCCCCTGCTCTGCAACAAGAGAAGCCACCGCAATGAGAAGCCCACGCACCGC

AATGAAGAGTAACCCTCACTCGCCACAACTAGAAAAAGCCCACGCACAGCAACAAAGACCCAATTCAGCCAAAAATAAAA

TAAATAAGAAAATGAATTAAAA----------AAAAAAGAATGAGA---GAATG----TGTGTGAAAAGGCTTTGTCAAT

AAGGAAATGTTGTGGATTACACT

>Mesoplodon_bidens

ATAACAGCTGCCTTGCTGATCTCACAGGGTTGTGTC---AAGACTGAATGAGA---GGGCTTTCCTGGTGGCGCAGTGGT

TAAGAACCCGCCTGCCAATGCAGGGGATATGGGCTCAAGCCCTGGTCCAGGAAGATCCA------CATGCCGCAACTAAG

CCCGTGTGCCACAACTT-CAAGCTTGCGCTCTAGAGCCCACGAGCCACAACTACTGAGCC--------------------

----------------CGCGTGCCTAGAACCCCTGCTCTGCAACAAGAGAAGCCACCGCAATGAGAAGCCCGTGCACCAC

AACGAAGAGTAACCCTCACTCGCCGCAACTAGAAAAAGCCCACGCGCAGCAATGAAGACCCAATGCAGCCAAAAATAAAA

TAAATAAGATAATGAATTAAAAAAAAA-----AAGACTGAATGAGA---GAATG----TGTGTGAAAAGGCTTTGTCAAT

AAGGAAATGTTGTGGACTACACT

>Physeter_catodon

ATAACAGCTGCCTTGCTGACCTCACAGGGTTGTGTC---AAGACTGAATGAGA---GGGCTT-CCTGGTGGTGCAGTGGT

TAAGAACCCGCTTGCCAATGCAGGGGACACGGGCTCGAGACCTGGTCCGGGAAGATCCCACATGCCACGGAGCAGCTAAG

CCCATGCGCCACAGCTT-CGAGCTTGCGCTCTAGAGCCCGCGAGCCACAACTACTGAGCCTGCGCTCTAGAGCCCGCGAG

CCACAACTACTGAGCCCGCGTGCCTAGAGCCCCTGCTCTGCAACAAGAGAAGCCACTGCAATGAGAAGCCCGCGCACTGC

AACGAAGAGTAACCCTAACTCGCCACAACTAGAAAAAGCCCACGCGCAGCAACGAAGACCCAATGCAGCCAAAGATAAAA

TAAATAAGAAAATGAATTTAAAAAAAAAA---AAGACCGAATGAGA---GAATG----TGTGTGAAAAGGCTTTGTCAAT

AAGGAAATGTTGTGGACTACACT

>Kogia_breviceps

ATAACAGCTGCCTTGCTGACCTCACAGGGTTGTGTC---AAGACTGAATGAGA---GGGCTT-CCTGGTGGCGCAGTGGT

TAAGAACCCGCCTGCCAATGCAGGGGACACGGGCTTGAGCCCTGGTTCGGGAAGATCCCACATGCCACAGAGCAGCTAAG

CCCGTGCGCCACAACTT-CGAGCTTGCGCTCTAGAGCCCGTGAGCCACAACTACTGAGCC--------------------

----------------CGCATGCCTAGAGCCCCTGCTCTGCAACAAGAGAAGCCACTGCAATGAGAAGCCCGCGCACCGC

AACGAAGAGTAACCCTCACTCGCCACAACTAGAAAAAGCCCACGCGCAGCAACGAAGACCCAATGCAGCCAAAAAT-AAA

TAAGAAATTTTTATTTTTTTAAAAAAA-----AAGACCGAATGAGA---GAATG----TGTGTGAAAAGGCTTTGTCAAT

AAGGAAATGTTGTGGACTACACT

>Balaenoptera_acutorostrata

ATAACAGCTGCCTTGCTGACCCCACAGGGTTGTGTC---AAGACTGAATGAGA---------------------------

--------------------------------------------------------------------------------

--------------------------------------------------------------------------------

--------------------------------------------------------------------------------

--------------------------------------------------------------------------------

-------------------------------------------------GAATG----TGTGTGAAAAGGCTTTGTCAAT

AAGGAAATGTTGTGGACTACGCT

>Eschrichtius_robustus

ATAACAGCTGCCTTGCTGACCTCACAGGGTTGTGAC---AAGACTGAATGAGA---------------------------

--------------------------------------------------------------------------------

--------------------------------------------------------------------------------

--------------------------------------------------------------------------------

--------------------------------------------------------------------------------

-------------------------------------------------GAATG----TGTGTGAAAAGGCTTTGTCAAT

AAGGAAATGTTGTGGACTACACT

>Hippopotamus_amphibius

ATAACAGCTGCCTTGCTGACCTCACAAGGCTGTGTC---AAGACTGAATGAGA---------------------------

--------------------------------------------------------------------------------

--------------------------------------------------------------------------------

--------------------------------------------------------------------------------

--------------------------------------------------------------------------------

-------------------------------------------------GAATG----CACGTGAAAAGCCTCTGTCAAT

A------------GGACTTCGCT

>Bos_taurus

ATAATAGCTGCCTTGCTGACCTCACAGGGTTTTGTC---AAGACTGAATGAGA---------------------------

--------------------------------------------------------------------------------

--------------------------------------------------------------------------------

--------------------------------------------------------------------------------

--------------------------------------------------------------------------------

-------------------------------------------------GAATGTGTATGTGTGACAAGGCTTTGTCAAT

AAGGAAATGTTGTGGACTTCACT

**Marker TP24**

>CHR-2

--------------------------------------------------------GGGCTTCCCTGGTGGCG------C

AGTGGTTAAGAATCTGCCTGCCAATGCAGGGGACACGGGTTCGAGCCCTGGTCCGGGAAGATCCCACATGCCGCGGAGCA

ACTAAGCCCNTGCGCCACAACTACTGAGCCTGCGCTCTAGAGCCCGCGAGCCACAACTACTGAGCCCGCGTGCCACAACT

ACTGAAGCCCACGTGCCTAGAGCCTGTGCTCCGCAACAAGAGAAGCCACCGCAATGAGAAGCCCGNGCACCGCAACGAAG

AGTAGCCCCCNCTTGCCGCAACTAGAGAAAGCCCGCGCNCAGCAACGAAGACCCAACGCAGCC-----------------

--------------------------------------------------------------------------------

-------

>Tursiops_truncatus

TATTGGGGGAAACAAATTGAGAGTCATATCAGACT---AAATAAGCATTAGCC---GGGCTTCCCTG-TGGTTAAGAATC

AGTGGTTAAGAATCCACCTGCCAATGCAGGGGACACAGGTTCACGCCCTGGTCCAGGAAGATCCCACATGCTGCGGAACA

ACTAAGCTGGTGCACCACAACTACTGAGCCTGCGCTCTAGAGCCCGTGAGCCACAACTACTGAGCCTGCCTACCACAACT

ACTGAAGCCTGTGTGCCTAGAGCCCGTGCTCCACG-CCAGAGAAGCCACCACAATGAGAAGCCCGCTCACCGCAACGAAC

AGTAGCCCCCGCTCTCTGCAACTAGAGAAAGCCCATGCGCAGCAACGAAAACCCAACGTAGCCAAAAAAAAAATTAAAAA

AAA---------------AAAAAAGCATTAGCC---TGTGTTTCAGACTGGGCACTAGACTAGGAAAGGAGGGGTCACTG

TGG-CTG

>Mesoplodon_bidens

TATTGAGGGAAACAAACTGAGAATCATATAAGACT---AAATAAGCATTAGCC---GGGCTTCCCTGTTGGTG------C

AGTGATTAAGAATCCGCTTGCCAATGCAGGGGACATGGGTTCGAGCCCTGGTCCATGAAGATCCCACATGCTGCGGAGCA

ACTAAGCTCATGCACCACAACTACTGAGCCTGCGCTCTAGAGCCCGTGAGCCACAACTACTGAGCCCACGTGCCACAACT

ATTGAAGCCCGCACGCCTAGAGCCCGTGCTCCACA-CAAGAGAAGCCACCACAATGAGAAGCCTGCTCACCGCAACGAAG

AGTAGCCCCCGCCCGCCACAACTAGAGAAAGCCCATGGGCAACAACGAAAATCCAACGTAGCCAAAACAAAATTTAAAAT

AAATAAATAA--------ATAAAAGCATTAGCC---GGTGTTTCAGGCTGGGCTCTAGACTAGGAAAGGAGGGGTCACTG

TGG-CTG

>Physeter_catodon

TATTGAGGGAAACAAATTGAAAATCATATCAGACT---AAATAAGCATTAGGC---GGGCTTCCCTGTTGGTG------C

AGTGGTTAAGAATCCGCCTGCCAATTCCGGGGGCACGGGTTCGAGCCCTCGTCCAGGAAGATCCCACATGCTGTGGAGCA

ACTAAGCCCGTGCGCCACAACTACTCAGCCTGCACTCTACAGCCCGTGAGCCACAACTA---AGCCTGCCTGCCACAACT

ACTGAAGCCCGCATGCCTAGAGCCCATGCTCTGCAATAAGAGGAGCCACTGCAATGAGAAGCCCGCTCACCGCAATGAAG

AGTAGCTCCCGCTCGCCGCAACTAGAGAAAGCCCATGCGCAGCAACAAAAACCCAACGCAGCCAAAAATAA--TTAAAAA

AAAAAAAAGA--------AT--AAGCATTAGCC---TGTGTTTCAGACTGGGCTCTAGACTAGGAAAGGAGGGATCACTG

TGG-CTG

>Kogia_breviceps

TATTGAGGGAAACAAATTGAAAATCATATCAGACT---AAATAAGCATTAGCT---GGGCTTCCCTGTTGGCA------C

AGTGGTTAAGAATCCGCCTGCCAATGCAGGGGACGTGGGTTCGAGCCCTCGTCCAGGAAGATCCCACGTGCTGTGGAGCA

ACTAAGCCGGTGCGCCACAACTACTGAGCCTGCGCTCTACAGCCCGTGAGCCACAACTACTGAGCCTGCCTGCCACAACT

ACTGAAGCCCGCACGCCTAGAGCCCATGCTCTGCAATAAGAGAAGCCACTGCAATGAGAAGCCCGCTCACCGCAATGAAG

AGTAGCCCCCGCTCGCCACAACTAGAGAAAGCCCATGCGCAGCAACGAAAACCCAATGCAGCCAAAAATAA--TTAAAAA

AAAAAAAAAAAAAGA---AT--AAGCATTAGCC---TGTGTTTCAGACTGGGCTCTAGACTAGGAAAGGAGGGATCACTG

TGG-CTG

>Balaenoptera_acutorostrata

TATTGAGGGAAACAAATTGAGAATCATATCAGACT---AAATAAGCATTAGCC---------------------------

--------------------------------------------------------------------------------

--------------------------------------------------------------------------------

--------------------------------------------------------------------------------

--------------------------------------------------------------------------------

------------------------------------TGTGTTTCAGACTGGGCTCTAGACTAGGAAAGGAGGGGTCACTG

TGG-CTG

>Eschrichtius_robustus

TATTGAGGGAAACAAATTGAGAATCATATCAGACT---AAATAAGCATTAGCC---------------------------

--------------------------------------------------------------------------------

--------------------------------------------------------------------------------

--------------------------------------------------------------------------------

--------------------------------------------------------------------------------

------------------------------------TGTGTTTCAGACTGGGCTCTAGACTAGGAAAGGAGGGATCACTG

TGG-CTG

>Hippopotamus_amphibius

TATTGAGGGAAACAAATTGAGATTCATATCAAACT---AAATAAGCATTAGCC---------------------------

--------------------------------------------------------------------------------

--------------------------------------------------------------------------------

--------------------------------------------------------------------------------

--------------------------------------------------------------------------------

------------------------------------TATGTTTCAGACTGTGCTCTAGTCTAGGAA-GGAGGAACCACTG

TGGGCTG

>Bos_taurus

TACTGAGGGAAACGAATGGAGAATCATATCAGATT---AAGTAAGCATTAACC---------------------------

--------------------------------------------------------------------------------

--------------------------------------------------------------------------------

--------------------------------------------------------------------------------

--------------------------------------------------------------------------------

------------------------------------TTTGTTTCAGACTGTGCTCTGGACTAGGAA-GGAGGGATCATTG

TGGGCTA

**Marker TP25**

>CHR-2

-------------------------------------------------------------GGGCTTCCCTGGTGGCGCA

GTGGTTAAGAATCTGCCTGCCAATGCAGGGGACACGGGTTCGAGCCCTGGTCCGGGAAGATCCCACATGCCGCGGAGCAA

CTAAGCCCNTGCGCCACAACTACTGAGCCTGCGCTCTAGAGCCCGCGAGC----------------------CACAACTA

CTGAGCCCGCGTGCCACAACTACTGAAGCCCACGTGCCTAGAGCCTGTGCTCCGCAACAAGAGAAGCCACCGCAATGAGA

AGCCCGNGCACCGCAACGAAGAGTAGCCCCCNCTTGCCGCAACTAGAGAAAGCCCGCGCNCAGCAACGAAGACCCAACGC

AGCC----------------------------------------------------------------------------

-----------------------------------------

>Tursiops_truncatus

CCAGCAACCAAGCTCCAGCCTGATCGGCAGCT-----TC---AGAATCCCAATCCCAT---GGGCTTCCCTGCTGGTGCA

ATGGTTGAGAATCCGCCTGCCAATGCAGGGGACACGGGTTCGAGCCCTGGTCCGGGAAGATCCCACATGCCGCGGAGCAA

CTAAGCCTGTGCGCCACAAGTAATGAGCCTGCACTCTAGAGCCTGCGAGC----------------------CACAACTA

CAGAGCCCGAGTGCCACAACTACTGAAGCCCACACGCCTAGAGCCTGTGCTCTGCAACAAGAGAAGCCACCGCAATGAGA

AGCCCGCGCACCGCAACGATGAGCAGCCCCCGCTTGCCGCAACTAGAGAAAGCCCGCGCACAGCAATGAAGACCCAACAC

AGCCAAAAATAAATAAATTATTAAAAAGAAAAAAGAAAAA---AG------------AATCCCAA---TCCCAATCAGAA

TCCCGAATAATCATCCTGCGTGATTAGGG-TC--CTCTGTT

>Mesoplodon_bidens

CCAGCAACCAAGCTCCAGCCTGATCTGCAGCT-----TC---AGAATCCCAATCCCAT---GGGCTTCCCTGCTGGCGCA

ATGGTTGAGAATCCGCCTGCCAATGGAGGGGACACGTGTTCGAGCCCTGGTCCGGGAAGATCCCACATGCCGTGGAGCAA

CTAAGCCCGTGCGCCACAACTACTGAGCCTGTGCTCTAGAGCCCGCGAGC----------------------CACAACTA

CAGCACCCGAGTGCCACAACTACTGAAGCCCGCACGCCTAGAACCTGTGCTCTGCAACAAGAGAAGCCACCGCGATGAGA

AGCCCCTGCACCGCAACAATGAGCAGCCCCCCCTCGCCGCAACTAGAGAAAGCCCGCGCACAGCAACGAAGACCCAACGC

AGCCAAAAATAAATTAATTATTAAAAAAAAAAAAA--------AGGATCCCAATCCCAATCCGAA---TCCCAATCCGAA

TCCCGAATAATCATC-TGCATGATTAGGG-TC--CTCTGCT

>Physeter_catodon

CCAGCAACCAAGCTCCAGCCTGATCGGCAGCT-----TC---AGAATCCCAATCCCAT---GGGCTTCCCTGGTGGCGCA

ATGGTTGAGAATCTGCCTGCCAATGCAGGGGACACGGGTTCAAGCCCTGGTCTGGGAAGATCCCACATGCCGCGGAGCAA

CTAAGCCCGTGCTCCACAACTACTGAGCCTGCGCTCTAGAGCCTGTGAGCTACAGCTACTGAGCCCGTGGGCCACAACTA

CTGAGCCCGCGAGCCACAGCTACTGAAGCCCGCGCGCCTAGAGCCCGTGCTCCGCAACAAGAGAAGCCTCCGCAATAAGA

AGCCCGCGCACTGCAACGATGAGCAGCCCCCGCTCGCTGCAACTAGAGAAAGCCTGCGCGCAGCAACGAAGACCCAACAC

AATAAAAAATAAATAAATTATTAAAAAAAAAAAAAAAA-----AG------------AATCCCAA---TCCCAATCAGAA

TCCCGAATAATCATCCTGCATGATTAGGG-TC--CTCTGCT

>Kogia_breviceps

CCAGCAACCAAGCTCCAGCCTGATTGGCAGCT-----TC---AGAATCCCAATCCCAT---GGGCTTCCTTGGTGGCGCA

ATGGTTGAGAATCTGCCTGCCAATGCAGGGGACACGGGTTTGAGCCCTGGTCCGGGAAGATCCCACATGCCGCGGAGCAA

CTAAGCCCGTGCGC----------------------------------------------------------CACAACTA

CTGAGCCCGCGAGCCACAGCTACTGAAGCCCGCGCGCCTAGAGCCCATGCTCCGCAACAAGAGAAGCCTCCGCAATAAGA

AGCCCGCGCACTGCAACGATGAGCAGTCCCCGCTTGCTGCAACTAGAGAAAGCCCGCGCGCAGCAACGAAGACCCAACAC

AACCAAAAATAAATAAATTATTTAAAAAAAAAAAAAAA-----AG------------AATCTCAA---TCCCAATCAGAA

TCCCGAATAATCATCCTGCATGATTAGGG-TC--CTCTGCT

>Balaenoptera_acutorostrata

CTGGCAACCAAGCTCCAGCCTGATCGGCAGCT-----TC---AGAATCCCAATCCCAA----------------------

--------------------------------------------------------------------------------

--------------------------------------------------------------------------------

--------------------------------------------------------------------------------

--------------------------------------------------------------------------------

--------------------------------------------------------------------TCCCAATCAGAA

TCCCGAATAATCATCCTGCATGATTAGGG-TC--CTCTGCT

>Eschrichtius_robustus

CCAGCAACCAAGCTCCAGCCTGATCGGCAGCT-----TC---AGAATCCCAATCCCAA----------------------

--------------------------------------------------------------------------------

--------------------------------------------------------------------------------

--------------------------------------------------------------------------------

--------------------------------------------------------------------------------

--------------------------------------------------------------------TCCCAATCAGAA

TCCCGAATAATCATCCCGCATGATTACGG-TC--CTCTGCT

>Hippopotamus_amphibius

CCAGCAACCAAACTCCAGCCTGATCTGCAGCT-----TC---ACAATCCCAATCCGAA----------------------

--------------------------------------------------------------------------------

--------------------------------------------------------------------------------

--------------------------------------------------------------------------------

--------------------------------------------------------------------------------

--------------------------------------------------------------------TCCCAATCAGAA

TCCCGACTGCTCATCCTACATGATTAGGGGTC--ATCTTTT

>Bos_taurus

CCAGTAACCAAACTCCAGCCTGACCTGCAGCTGGAGGTC---AGAATCCCAACCTCAG----------------------

--------------------------------------------------------------------------------

--------------------------------------------------------------------------------

--------------------------------------------------------------------------------

--------------------------------------------------------------------------------

--------------------------------------------------------------------TCCCAATCAGAA

TCCCCAATGCTCATCCTGCGTGATTAGGG-TCCTCTCTGCC

**Marker TP26**

>CHR-2B

---------------------------------------------------------GGGACTTCCCTGGTGGTCCAGTG

GTTAAGAATCTGCCTGCCAATGCAGGGGACACGGGTTCAATCCCTGGTCCGGGAAGATCCCACATGCCGTGGAGCAACTA

AGCCCGTGCGCCACAACTACTGAGCCTGTGCTCTAGAGCCCGCGAGCCGCAACTACTGAAGCCCGCGCGCCCTAGAGCCC

GTGCTCTGCAACAAGAGAAGCCACCGCAATGAGAAGCCCGCGCACCGCAGCTAG-AGAGTAGCCCCCGCTCGCCGCAACT

AGAGAAAGCCCNCGCGCAGCAACGAAGACCCAGCACAGCCAAAAATAAATAAATAAAT----AAA---------------

-----------------------------------------------------------------

>Tursiops_truncatus

CTTCCCTCTTCTAGATAACTGTGACTTGGTATATTATT---AAAAGTTCTCTG---GGGGGCTTCCCTGGTGGCGCAGTG

GTTGAGAGTCTGCCTGCCGATGCAGGGGACACAGGTTCGAGCCCTGGCCTGGGAGGATCCCACATGCCGCGGAGCAACTG

GGCCCGTGAGCCACAACTACTGAGCCTGCGCGT--------------------------------------CTGGCGCCT

GTGCTCCGCAACAAGAGAGGCCACGATAGTGAGAGGCCCGCTCACTGCGAT--GAAGAGTGGCCCCTGCTCGCTGCAACT

AGAGAAAGCCCTCGCACAGAAACGAAGACCCAACACAGCCAAAAATAAATAAATAAAT----TTATT---AAAAAA----

AAAAGTTCTCTG---AGCTCCAGTTCTGTCACAGTAAAGTTGGGTAATAGTTCCAGCTGTCAGCG

>Mesoplodon_bidens

CTTCCCTCTTCTAGATAACTGTGACTTGGTATATTATT---AAAAGTTCTCTG---GGGGGCTTCCCTCGTGGTGCAGTG

GTTGAGAGTCTGCCTGCCCATGCAGGGGACACGGGTTCAAGCCCTGGTCTGGGAGGATCCCACATGCCGTGGAGCAACTG

GGCCCGTGAGCCACAACTACTGAGCCTGCACAT--------------------------------------CTGGAGCCT

GTGCTCCGCAACAAGAGAGGCCGCGATAGTGAGAGGCCCGCGCACTGCGAT--GAAGAGTGGCCCCTGCTCGCTGCAACT

AGAGAAAGCCCTCACACAGAAACGAAGACCCAACACAGCCAAAAATAAATAAATAAAT----TTATTTAAAAAAAA----

AAGAGTTCTCTG---AGCTCCAGTTCTGTCACAGTAAAATTGGCTAATAGTCCCAGCTGTCAGTG

>Physeter_catodon

CTTCCCTCTTCTAGATAACTGTGACTTGGTATATTGTT---AAAAGTTCTCTG---GGGGGCTGCCCTGGTGGCGCAGTG

GTTGAGAGTCTGCCTGCCGATGCAGGGGACACGGCTTCGAGCCCTGGTCTGGGAGGATCCCACATGCCGCGGAGCAACTA

GGCCCGTGAGCCACAACTACTGAGCCTGCGCGT--------------------------------------CTGGAGCCT

GTGCTCCGCAAC--GAGAGGCTGCGACAGTGAGAGGCCCGCGCACCGCGAT--GAAGAGTGGCCCCCGCTCGCTGCAACT

GGAGAAAGCCCTCGCACAGAAATGAAGACCCAACACAGCCAAAAATAAATAAATTTAT----TAA-----AAAAAA----

AAAATTTCTCTG---AGCTCCAGTTCTGCCACAGTAAAATTGGGTAATAGTCCCAGCTGTCATTG

>Kogia_breviceps

CTTCCCTCTTCTAGATAACTGCGACTTGGTATATTATT---AAAAGTTCTCTG---GGGGGCTTCCCTGGTGGCGCAGTG

GTTGAGAGTCTGCCTGCCGATGCAGGGGACACGGGTTCGAGCCCTGGTCTGGGAGGATCCCACATGCCGCGGAGCAACTA

GGCCCGTGAGCCGCAACTACTGAGCCTGTGCAT--------------------------------------CTGGAGCCC

GTGCTCCGCAAC--GAGAGGCTGCGACAGTGAGAGGCCCGCGCACCCCGAT--GAAGAGTGGCCCCCGCTCGCTGCAACT

GGAGAAAGCCCTCGCACAGAAATGAAGACCCAACACAGCCCAAAATAAATAAATAAATAAATTTATTAAAAAAAAAA---

AAATTTTCTCTG---AGCTCCAGTTCTGCCACAGTAAAATTGGGTAATAGTCCCAGCTGTCATTG

>Balaenoptera_acutorostrata

CTTCCCTCTTCTAGATAACTGTGACTTGGCATATTATT---TAAAGTTCTCTG---------------------------

--------------------------------------------------------------------------------

--------------------------------------------------------------------------------

--------------------------------------------------------------------------------

--------------------------------------------------------------------------------

---------------AGCTCCAGTTCTGTCACAGTAAAATTGGGCAATAGTCCCAGCTGTCAATG

>Eschrichtius_robustus

CTTCCCTCTTCTAGATAACTGTGACTTGGCATATTATT---AAAAGTTCTCTG---------------------------

--------------------------------------------------------------------------------

--------------------------------------------------------------------------------

--------------------------------------------------------------------------------

--------------------------------------------------------------------------------

---------------AGCTCCAGTTCTGTCACAGTAAAATTGGGTAATATTCCCAGCTGTCAATG

>Hippopotamus_amphibius

CTTCCCTCTTCTTGAGAACTGTGACTTGGCATGT-ATT---AAAAGTTCTCTG---------------------------

--------------------------------------------------------------------------------

--------------------------------------------------------------------------------

--------------------------------------------------------------------------------

--------------------------------------------------------------------------------

---------------AGCTCCAGGTCTGTCACAGTAAAATTGAGTGATAG-CCCAGCTGTCAGTG

>Bos_taurus

CTTCCCTCTTCTAGATAATTGTCTCTTGGCACGTTATT---AAAGGTTCTCTG---------------------------

--------------------------------------------------------------------------------

--------------------------------------------------------------------------------

--------------------------------------------------------------------------------

--------------------------------------------------------------------------------

---------------AACTCCAGTTTAGTCATGGTGAA--------ATAGTGCCAGCTGTCAGTG

**Marker TP27**

>CHR-2

-----------------------------------------------------------GGG--CTTCCCTGGTGGCGCA

GTGGTTAAGAATCTGCCTGCCAATGCAGGGGA--CACGGGTTCGAGCCCTGGTCCGGGAAGATCCCACATGCCGCGGAGC

AACTAAGCCCNTGCGCCACAACTACTGAGCCTGCGCTCTAGAGCCCGCGAGCCACAACTACTGAGCCCGCGTGCCACAAC

TACTGAAGCCCACGTGCCTAGAGCCTGTGCTCCGCAACAAGAGAAGCCACCGCAATGAGAAGCCCGNGCACCGCAACGAA

GAGTAGCCCCCNCTTGCCGCAACTAGAGAAAGCCCGCGCNCAGCAACGAAGACCCAACGCAGCC----------------

--------------------------------------------------------------------------------

--------

>Tursiops_truncatus

CT--CCCCTTTGGACTCTGTGTTATTAAGTGAGCTT---AAAAAA-TACTGCTATT---GGGGGCTTCCCTGGTGGCGTA

GTGGTTAAGAATCCGCCTGCCAATGCAGGGGA--CACGGGTTTGAGCCCTGGTCCGGGAAGATCCCACATGCCATGGAGC

AACTAAGCCTGTGCACCGCAACTACTGAGCCTGTGCTCTAGAGCCCACGAGCCACAACTACTGAGCCCACTTGTCACAAC

TACTGAAGCCCGCACACCTAGAGCCCATGCTCCGCGACAAGAGAAGCCACCACAATAAGAAGCCAGCACACTGCAATGAA

GGGTAGCCCCCGCTCTCCGAAACCAGAGAAAGTCTGCGCGCAGCAACAAAGACCCAACACAGCCAAAAATAAAAATAACT

AAAAAAGAAATGAAA---AAAA-ATACTGTAATT---CAGTT-ATTAGTTATTGGAACGTTAGCTGTCAGCCTGCGTAGC

TGAGGTTG

>Mesoplodon_bidens

CT--CCCCTTTGGACTGTGTGTTATTAAGTGAGCTT---AAAAAA-TACTGTAATT---GGGGACTTCCCTGGTGGCGCA

GTGGTTAAGAATCCGCCTGTCAATGCAGGGAA--CACGGGTTCAAGCCCTGGTCTGGGAAGCTCCCACGTGCCACGGAGC

AACTAAGCCCATGCGCCACAACTACTGAGCCTGCGCTCTAGAGCCCACGAGCCACAACTACTGAGCCC------------

-----------GCATGTCTAGAGCCCGTGCTCCGCAACAAGAGAAGCCACCGCAATAAGAAGCCGGCGCACTGCAACAAA

GAGTAGCCCCCGCTCTCCGAAACCAGAGAAAGTCTGCGCACAGCAACAAAGACCCAACACGGCCAAAAATAAAAA---AT

AGAAAAGAAATGAAA---AAAAAATACTGTAATT---CAGTT-GTCAGTTCTTGGAACGTTAGCTGTCAGCCTGCGTAGC

TGAGGTCG

>Physeter_catodon

CT--CCCCTTTGGACTGTGTGTTATTAAGTGAGCTT---AAAAAAATACTGTAATT---GGGGACTTCCCTGGTGGCGCA

GTGGTTAAGAATCCACCTGCCAATGCAGGGGA--CACGGGTTCGAGCCCTGGTCTGGGAAGATCCCACATGCCGCAGAGC

AACTAAGCCCGTGCGCCACAACTACTGAGCCTGTGCTCTAGAGCCCGCGAGCCACAACTACTGAGCCTGCTAGCCACAAT

TACTGAAGCCTGCATGCCTAGAGCCCATGCTCCACAACAAGAGAAGCCACCGCAATAAGAAGCCGGCACGCCGCAACGAA

GAGTAGCCCCCGCTCTCCGAAACCAGAGAAAGCCCGCGTGCAGCAACGAAGACCCAACACAGCCAAAAATAAAAATAAAT

AAAAAAGAAATTAAA---AAAATATACTGTAATT---CATTT-ATCGGTTCTTGGAACGTTAGCTGTCGGCCTGCGTAGC

TGAGCTCG

>Kogia_breviceps

CTATCCCCTTTGGACTGTGTGTTATTAAGTGAGCTT---AAAAAA-TACTGTAATT---GGGGACTTCCCTGGTGGCGCA

GTGGTAAAGAATCCTCCTGCCAATGCAGGGGACGCACGGGTTCAAGCACTGGTCTGGGAAGATCCCACATGCCATGGAGC

AACTAAGCCCATGTGCCACAACTACTGAGCCTGTGCTCTAGAGCCCATGAGCCACAACTACTGAGCCCGCGAGCCACAAT

TACTGAAGCCTGCATGCCTAGAGCCCATGCTCCAAAACAGGAGAAGCCACCGCCATAAGAAGCCAGCACACCACAACGAA

GAGTAGCCCCCGCTCTCCGAAACCAGAGAAAGCCCGCGTGCAGCAACGAAGACCCAACACAGCCAAAAATAAAAATAAAT

AAAAAAGAAATTTA----AAAAAATACTGTAATT---CAGTT-ATCAGTTCTTGGAACGTTAGCTGTCAGCCTGCGTAGC

TGAGGTCG

>Balaenoptera_acutorostrata

CT--CCCCTTTGGACTGTGTGTTATTAAGTGAGCTT---AAAAAA-TACTGTAATT------------------------

--------------------------------------------------------------------------------

--------------------------------------------------------------------------------

--------------------------------------------------------------------------------

--------------------------------------------------------------------------------

-------------------------------------CAGTTAATCAGTCCTTGGAACGTTAGCTGTCAGCCTGCGTAGC

TGAGGTCG

>Eschrichtius_robustus

CT--CCCCTTTGGACTATGTGTTATTAAGTGAGCTT---AAAAAA-TACTGTAATT------------------------

--------------------------------------------------------------------------------

--------------------------------------------------------------------------------

--------------------------------------------------------------------------------

--------------------------------------------------------------------------------

-------------------------------------CAGTTCATCAGTCCTTGGAACGTTAGCTGTCAGCCTGCGTAGC

TGAGGTCG

>Hippopotamus_amphibius

CTTACCTGTTTTGATT--GTGTCATTAAGTGAACTT---AAAAAA-TACTGTAATC------------------------

--------------------------------------------------------------------------------

--------------------------------------------------------------------------------

--------------------------------------------------------------------------------

--------------------------------------------------------------------------------

-------------------------------------CAG----GCCGTCCTTGGAAGGTTAGTGGTCAGCCTGCCTAGC

CGAGGTCG

**Marker TP28**

>CHR2A_Ttr

--------------------------------------------------------------------------------

--------------------------------------------------------------------------------

--------------------------------------------------------------------------------

--------------------------------------------------------------------------------

--------------------------------------------------------------------------------

--------------------------------------------------------------------------------

--------------------------------------------------------------------------------

----------------------------------------------------------GGGCTTCCCTGGTGGCGCAGTG

GTTGAGAGTCCGCCTGCCGATGCAGGGGACACGGGTTCGTGCCCCGGTCCGGGAAGATCCCACATGCCGCGGAGCAGCTA

GGCCCGTGAGCCATGGCCGCTGAGCCTGCGC-GTCCGGAGCCTGTGCTCCGCAACGGGAGAGGCCACAACAGTGAGAGGC

CCGCGTACCGCAAAAAAAAAAAAAAAAAAA--------------------------------------------------

-------------------------

>Tursiops_truncatus

AGAGTCTTTGGATAAATCTGTGCTGATATAAATTAATC---AAAACC---------------------------------

--------------------------------------------------------------------------------

--------------------------------------------------------------------------------

--------------------------------------------------------------------------------

--------------------------------------------------------------------------------

--------------------------------------------------------------------------------

--------------------------------------------------------------------------------

------------------------------------------------AAACCA----GGGCTTCCCTGGTGGCGCAGTG

GTTGAGAGTCCGCCTGCCGATGCAGGGGACGCGGGTTCGTGCCCCGGTCCGGGAAGATCCCACATGCCGCGGAGCGGCTG

GGTCCGTGAGCCATGGCCGCTGAGCCTGCGC-ATCTGGAGCCTGTGCTCCGCAACGGGAGAGGCCACAACAGTGAGAGGC

CCGCGTACCGCCAAAAAAAAAAAAAA-------AAAACCAACCCA---AATCTAACTTCATACTATAATGATTAC-----

--TGTGTCTGCTCCAAGGCAAACTT

>Mesoplodon_bidens

AGAGTCTTTGGATAGATCTGTGCTGATATAAATCTATC---AAAACC---------------------------------

--------------------------------------------------------------------------------

--------------------------------------------------------------------------------

--------------------------------------------------------------------------------

--------------------------------------------------------------------------------

--------------------------------------------------------------------------------

--------------------------------------------------------------------------------

------------------------------------------------AACGCA----GGGCTTCCCTGGTGGTGCAGTG

GTTGAGAGTCCACCTGCCGATGAAGGGGACACGGGTTCGTGCCCCGGTCCAGGAAGATCCCACATGCCGCAGAGCAGCTG

GGCCCGTGAGCCATGGCCGCTGAGCCTGCGC----------------TCCGCAATGGGAGAGGCCACAACTGTGAGAGGC

CCGTGTACCACACACACACACAAAAAAA-----CAAACCAACCCA---AATCTAACTTCATACTATAATGATTAC-----

--TGTGTCTGCTCCAAGGCAAACTT

>Physeter_catodon

AGAGTCTTTGGATAAATCTGTGCTGATATAAATTAATC---AAAACC---------------------------------

--------------------------------------------------------------------------------

--------------------------------------------------------------------------------

--------------------------------------------------------------------------------

--------------------------------------------------------------------------------

--------------------------------------------------------------------------------

--------------------------------------------------------------------------------

------------------------------------------------AACCCAA---GGGCTTCCCTGGTGGCGCAGTG

GTTGAGAGTCCGCCTGCCGAAGCAGGGGACACGGGTTCGTGCCCCGGTCCGGGAAGATCCCACGTGCCGCGGAGCGGCTG

GGCCCGTGAGCCGTGGCCGCTGAGCCTGCGC-GTCGGGAGCCTGCGCTCCGCAACGGGAGAGGCCACAACAGTGAGAGGC

CCGCGTACAGCAAAAAAAAAAAAAAAA------AAAACCAACCCA---AATCTAACTTCATACTATAATGATTAC-----

--TGTGTCTGCTCCAAGGCAAACTT

>Kogia_breviceps

AGAGTCTTTGGATAAATCTGTGCTGATACAAATTAATC---AAAACC---------------------------------

--------------------------------------------------------------------------------

--------------------------------------------------------------------------------

--------------------------------------------------------------------------------

--------------------------------------------------------------------------------

--------------------------------------------------------------------------------

--------------------------------------------------------------------------------

------------------------------------------------AACCCAA---GGGCTTCCCTGGTGGCGCAGTG

GTTAAGGGTCCGCCTGCCGATGCAGGGGACGCGGGTTCGTGCTCCGGTCCGGGAAGATCCCACATGCCGCGGAGCGGCTG

GGCCCGTGAGCCATGGCCGCTGGGCCTGCGCCGTCCGCAGCCTGTGCTCCGCAGCGGGAGATGCCACAGCGGTGAGAGGC

CCGCGTACCGCAAAAAA----------------AAAAAAAACCCA---AATCTAACTTCATATTATAATGATTAC-----

--TGTGTCTGCTCCAAGGCAAACTT

>Balaenoptera_acutorostrata

AGAGTCTTTGGATAAATCTGTGCTGATATAAATGAATC---AAAACC---------------------------------

--------------------------------------------------------------------------------

--------------------------------------------------------------------------------

--------------------------------------------------------------------------------

--------------------------------------------------------------------------------

--------------------------------------------------------------------------------

--------------------------------------------------------------------------------

------------------------------------------------AACCCA--------------------------

--------------------------------------------------------------------------------

--------------------------------------------------------------------------------

------------------------------------------------AATCTAACTTCATACTATAATGATTAC-----

--TGTGTCTGCTCCAAGGCAAACTT

>Eschrichtius_robustus

AGAGTCTTTGGATAAATCTGTGCTGATATAAATGAATC---AAAACC---------------------------------

--------------------------------------------------------------------------------

--------------------------------------------------------------------------------

--------------------------------------------------------------------------------

--------------------------------------------------------------------------------

--------------------------------------------------------------------------------

--------------------------------------------------------------------------------

------------------------------------------------AACCCA--------------------------

--------------------------------------------------------------------------------

--------------------------------------------------------------------------------

------------------------------------------------AATCTAACTTCATACTACAATGATTAC-----

--TGTGTCTGCTCCAAGGCAAACTT

>Hippopotamus_amphibius

AGAGCCTTTCGAGAAATCTGTGCTGATATAAATTAATC---AAAACT---------------------------------

--------------------------------------------------------------------------------

--------------------------------------------------------------------------------

--------------------------------------------------------------------------------

--------------------------------------------------------------------------------

--------------------------------------------------------------------------------

--------------------------------------------------------------------------------

------------------------------------------------AACCCA--------------------------

--------------------------------------------------------------------------------

--------------------------------------------------------------------------------

------------------------------------------------AATCTAACTTCATACTATAATGATTAC-----

--CGTGTCTAATCCAAGGCAAACTT

>Bov-tA2

--------------------------------------------------------------------------------

--------------------------------------------------------------------------------

--------------------------------------------------------------------------------

--------------------------------------------------------------------------------

--------------------------------------------------------------------------------

--------------------------------------------------------------------------------

-------------------------------GGACAGAGGAGCCTGGCGGGCTACAGTCCATAGGGTCGCAAAGAGTCGG

ACACGACTGAGCGACT-AACA-----------------------------------------------------------

--------------------------------------------------------------------------------

--------------------------------------------------------------------------------

--------------------------------------------------------------------------------

-------------------------

>BovB_Oa

---------------------------------------------------------CTTGGAAGAAAA--GCTATGACC

AACCTAGACAGCATATTAAAAAGCAGAGACATTACTTTGCCAACAAAGGTCCATATAGTCAAAGCTATGGTTTTTCCAGT

AGTCATGTATGGATGTGAGAGTTGGACCATAAAGAAAGCTGAGCACCGAAGAATTGATGCTTTTGAACTGTGGTGCTGGA

GAAGACTCTTGAGAGTCCCTTGGACTGCAAGGAGATCAAACCAGTCAATCCTAAAGGAAATCAACCCTGAATATTCATTG

GAAGGACTGATGCTGAAGCTGAAGCTCCAATACTTTGGCCACCTGATGTGAAGAGCTGACTCATTGGAAAAGACCCTGAT

GCTGGGAAAGATTGAAGGCAGGAGGAGAAGGGGATGACAGAGGATGAGATGGTTGGATGGCATCACCGACTCAATGGACA

TGAGTTTGAGCAAACTCCGGGAGATGGTGAA-------------------------------------------------

--------------------------------------------------------------------------------

--------------------------------------------------------------------------------

--------------------------------------------------------------------------------

--------------------------------------------------------------------------------

-------------------------

>Bos_taurus

AGAGACTAT-GATAAATCTGTGTGGATATAAATTAATT---AAAACTAATCCCAA-TCTTGGAAAAAAAAAGCTATGACA

AACCTAGACAGCATATTAAAAAGCAGAGACATTACTTTGCCTAAAAAAGTCTGTGTAATCAAAGCTATGGTTTTTCCAGT

AGTCATGTATGGATATGAAAGTTGGACTATGAGGAAGGCTGAGCGCTGAAGAATTGATGCTTGCCAACTGTGGTGCTGGA

AAAGACTCTTGAGAGTCCCTTGGACTGCAAGGATATCAAACCAGTCAATCCTAAAGGAAATCAATCCTGAATATTCATTG

GAAGGACTGATGCTGAAGCTGAAGCTCCAATACTTTGG-CACCTGATGCGAAGAGCCAACTCATTAGAAAAGACCCTGAT

GCTGGGAAAGATTGAAGGTGGGAGGAGAAGGGGACCACGGAAGATGAGATGGTTGGATGGCATCA-CGACTCAATGGACA

TGAGTTTGAGCAAGCTCCAGGAGATGGTGAAGGACAGAGAAGCCTGGCATGCTGCAGTCTATCAGATCACAAAGAGTTGG

ACATAACTGAGCGACTGAACAACAACAAAATCCCAGACTGAACAACAAAATCCC--------------------------

--------------------------------------------------------------------------------

--------------------------------------------------------------------------------

------------------------------------------------AATCTAACTTGCTACTGTAATGACTACAATAT

ACTATGTCTGCACCAAGGCAAAAGT

**Marker TP29**

>CHR2A_Ttr

--------------------------------------------------------GGGCTTCCCTGGTGGCGCAGTGGT

TGAGAGTCCGCCTGCCGATGCAGGGGACACGGGTTCGTGCCCCGGTCCGGGAAGATCCCACATGCCGCGGAGCAGCTAGG

CCCGTGAGCCATGGCCGCTGAGCCTGCGCGTCCGGAGCCTGTGCTCCGCAACGGGAGAGGCCACAACAGTGAGAGGCCCG

CGTACCGCAAAAAAAAAAAAAAAAAAA-----------------------------------------------------

---------------------------------

>Tursiops_truncatus

TGGTAGCCTAATGATGAATAAGAACAACTTCCTTC---AAAAAAGTACCATCA---GGGCTTCCCTGGTGGCGCAGTGGT

TGAGAGTCTGCCTGCCGATGCAGGGGACGCAGGTTCATGCCCTGGTCCGGGAAGATCCCACATGCCGTGGAGCGGCTGGG

CCTGTGAGCCATGGCCTCTGAGCCTGTGCGTCCGGGGCCTGTGCTCCGCGGCGGGAGGGGCCACAACAGTGAGAGGCCCG

CGTACCGCAAAAAAAAACCAA------------------------CAAAAAGTACCATCA---GTAGGCAAGGGATTTTG

GGGTCCCTGGAAAATAAAACTCACCACTTTCAA

>Mesoplodon_bidens

TGGTAGCCTAATGATGAATAAGAAC---TTCCTTC---AAAAAAGTACCATCA---GGGCTTCCCTGGTGGTGCAGTGGT

TGAGAGTCCGCCTGCTGATGCAGGGGACACGGGTTCATGCCCCGGTCTGGGAGGATCCCGCATGCCACGGAGTGGCTGGG

CCCGTGAGACATGGCCACTGAGCCTGTGCGTCCGGGGCCTGTGCTCCGCGGCGGGAGGGGCCACAACAGTGAGAGGCCCG

CGTACCGCAAAAAAAAAAAAAAAA---------------------AAAAAAGTACCATCA---GTAGGCAAGGGATTTTG

GGGTCCCTGGAAAATAAAACTCACCACTTTCAA

>Physeter_catodon

TGGTAGCCTAATGATGAATAAGAACAACTTCCTTC---CAAAAAGTACCATT----GGGCTTCCCTGGTGGCGCAGTGGT

TGAGAGTCCGCCTACCGATGCAGGGGACACAGGTTCGTGCCCCGGTCTGGCAAGATCCCACATGCTGCGGAGCGGCTAGG

CCCATGAGCCATGGCCGCTGAGCCTGTGCGTCCAGAGCCTGTGTTCCGCAACGGGAGAGGCCACGACAGTTGGAGGCCCG

CGTACCGCAAAAAAAAAAAAAAAAAAAAAAAAAAAAAAAAAA---AAAAAAGTACCATCA---GTAGGCAAGGGATTTTG

GGGTCCCTGGAAAATAAAACTCACCACTTTCAA

>Kogia_breviceps

TGGTAGCCTAATGATGAATAAGAACAACTTCCTTC---CAAAAAGTACCATC----GGGCTTCCCTGGTGGCGCAGTGGT

TGAGAGTCTGCCTACCGATGCAGGGGACATGGGTTCGTGCCCCGGTCCGGGAAGACCCCACATGCCGCGGAGCGGCTGGG

CCCATGAACCATGGCCGCTGAGCCTGCGCGTCCAAAGCCTGTGCTCCGCAACGGGAGAGGCCACAAAAGTGAGAGGCCCG

TGTACCGAAAAAAA-------------------------------AAAAAAGTACCATCA---GTAGGCAAGGGATTTTG

GGGTCCCTGGAAAATAAAACTCACCACTTTCAA

>Balaenoptera_acutorostrata

TGGTAGCCTAATGATGAATAAGAACAACTTCCTTC---AAAAAAGTACCATCA---------------------------

--------------------------------------------------------------------------------

--------------------------------------------------------------------------------

---------------------------------------------------------------GTAGGCAAGGGATTTTG

GGGTCCCTGGAAAATAAAACTCACCACTTTCAA

>Eschrichtius_robustus

TGGTAGCCTAATGATGAATAAGAACAACTTCCTTG---AAAAAAGTACCATCA---------------------------

--------------------------------------------------------------------------------

--------------------------------------------------------------------------------

---------------------------------------------------------------GTAGGCAAGGGATTTTG

GGGTCCCTGGAAAATAAAACTCACCACTTTCAA

>Hippopotamus_amphibius

TGGTAGCCTAATGATGAGTAAGAACAACTTCCTTC----AAAAAGAACCATCA---------------------------

--------------------------------------------------------------------------------

--------------------------------------------------------------------------------

---------------------------------------------------------------GTAGGCAAGGGATTTTG

GGGTCCCTGGACAGCAAAACGCACCACTTTCAA

>Bos_taurus

TAGTAGCCTAATGATGACTAAGAAGAACTTCCTTC----CAAAAGCACCATGA---------------------------

--------------------------------------------------------------------------------

--------------------------------------------------------------------------------

---------------------------------------------------------------GTAGGTAAGGGATTTTG

GGGTCCTTGAACAATAAAA--CACCACTTCCAG

**Marker TP35**

>CHR-2

--------------------------------------------------------GGGCTTCCCTGGTGGCGCAGTGGT

TAAGAATCTGCCTGCCAATGCAGGGGACACGGGTTCGAGCCCTGGTCCGGGAAGATCCCACATGCCGCGGAGCAACTAAG

CCCNTGCGCCACAACTACTGAGCCTGCGCTCTAGAGCCCGCGAGCCACAACTACTGAGCCCGCGTGCCACAACTACTGAA

GCCCACGTGCCTAGAGCCTGTGCTCCGCAACAAGAGAAGCCACCGCAATGAGAAGCCCGNGCACCGCAACGAAGAGTAGC

CCCCNCTTGCCGCAACTAGAGAAAGCCCGCGCNCAGCAACGAAGACCCAACGCAGCC-----------------------

--------------------------------------------------------------------------------

--------------------------------------------------------------------------------

--------------------------------------------------------------------------------

--------------------------------------------------------------------------------

--------------------------------------------------------------------------------

--------------

>Tursiops_truncatus

ATGGGACAATTTAGTCACCCTACATTTAACCCTCTC---AAAACCTTATGAAG---GGGCTTCCCTGGTGGCACAGTGGT

TAAGAACCTGCCTGCCAATGCAGGGGACACAGGTTTGAGCCCTGGTCCGGGAAGATCCCACATGCTGTAGAGCAACTAAG

CCCGTGTGCCACAACTACTGAGCCTGTGCTCTCGAGCCCGTGAGCCACAACTACTGAGCCCACGTGCCACAACTACTGAA

GCCCGCGCGCCTAGAGCCTGTGCTCTGCAACAAGAGAAGCCACTGCAATGAGAAACCCATGTACCGC-ACGAAGAGTAGC

CTCCGCTCGATGCAACTAGAGAAAGCCCGCGTGCAGCAACAAAGATCCAACGCAGCCAAAAATAAATAAATACATTTATA

AAAAACCAAAACAAAACAA------------AAAACCTTATGAAG---GAGCCACTATTGCTGCTTCCATTTT-------

--------------------------------------------------------------------------------

--------------------------------------------------------------------------------

--------------------------------------------------------------------------------

---------------------------------------------------------------------AAGGATAAGAA

AACCAAGGGTTAGA

>Mesoplodon_bidens

ATGGGACAATTTAGTCACCCTACATTTAACCCTCTC---AAAACCTTATGAAG---GGGCTTCCCTGGTGGCACAGTGGT

TAAGAACCCGCCTGCCAATGCAGGGGACACAGGTTTGAGCCCTGGTCCAGGAAGAGCCCACATGCTGCAGAGCAACTAAG

CCTGTGTGCCACAACTACTGAGCCTGTGCTCTAGAGACCGTGAGCCACAACTACTGAGCCCACGTGCCACAACTACTGAA

GCCCGCGTGCCTAGAGCCTGTGCTCTGCAACAAGAGAAGCCACTGCAATGAGAAACCCGCGTACCGC-ATGAAGAGTAGC

CTCCGCACGATGCAACTAGAGAAAGCCCGCGTGCAGCAACAAAGACCCAACGCAGCCAAAAATAAATAAATTTATAAAAA

ACAAAACAAAACAAA----------------AAAACCTTATGAAG---GAGCCACTATCGCTGCTTCCATTTT-------

--------------------------------------------------------------------------------

--------------------------------------------------------------------------------

--------------------------------------------------------------------------------

---------------------------------------------------------------------AAGGATAAGAA

AACCAAGGGTTAGA

>Physeter_catodon

ATGGGACAATTTAGTCACCCTACATTTAACCCTCTC---AAAACCTTATGAAG---GGGTTTCCCTGGTGGCACAGTGGT

TAAGAACCCGCCTGCCAATTCAGGGGACACAGGTTTGAGCCCTGGTCCGGGAAGATCCCACATGCTGCAGAGCAACTAAG

CCTGTGTGCCAGCACTACTGAGCCTGTGCTCTAGAGCCCGTGAGCCACAACTACTGAGCCCACGTGCCACAACTACTGAA

GCCCGTGCCCCTAGAGCCTGTGCTCTGCAACAAGAGAAGCCACTGCAATGAGAAACCCGCGTACCGC-ACGAAGAGTAGC

CTCCGCTCGATGCAACTAGAGAAAGCCCGCGTGCAGCAACAAAGACCCAATGCAGCCAAAAATAAATAAATAAATTTATA

AAAAACAAACAAACAAACAAAAAAAAAC---CACACCTTATGAAG---GAGCCACTATTGCTGTTTCCATTTT-------

--------------------------------------------------------------------------------

--------------------------------------------------------------------------------

--------------------------------------------------------------------------------

---------------------------------------------------------------------AAGGATAAGAA

AACCAAGGGTTAGA

>Kogia_breviceps

ATGGGACAATTTAGTCACCCTACATTTAACCCTCTC---AAAACCTTATGAAG---GGGCTTCCCTGGTGGCACAGTGGT

TAAGAACCCGCCTGCCAATTCAGGGGACGTAGGTTTGAGCCCTGGTCCGGGAAGATCCCACATGCTGCAGAGCAACTAAG

CCTGTGTGCCACAACTACTAAGCCTGTGCTCTAGAGCCCGTGAGCCACAACTACTGAGCCCACATGCCACAACTACTGAA

GCCCACGCACCTAGAGCCTGTGCTCTGCAACGAGAGAAGCCACTGCAATGAGAAACCCGCGTACCGC-ACAAAGAGTAGC

CTCCGCTCGATGCAACTAGAGAAAGCCCACGTGCAGCAACAAAGACCCAATGCAGCTAAAAATAAATAAATAAATTTATA

AAAAACAAACAAACAAA--------------AACACCTTATGAAG---GAGCCACTATTGCTGCTTCCATTTT-------

--------------------------------------------------------------------------------

--------------------------------------------------------------------------------

--------------------------------------------------------------------------------

---------------------------------------------------------------------AAGTATAAGAA

AACCAAGGGTTAGA

>Balaenoptera_acutorostrata

ATGGAACAATTTAGTCACCCTACATTTAACCCTCTC---AAAACCTTATGAAG---------------------------

--------------------------------------------------------------------------------

--------------------------------------------------------------------------------

--------------------------------------------------------------------------------

--------------------------------------------------------------------------------

------------------------------------------------GAGCCACTATTGCTGCTTCCGTTTT-------

--------------------------------------------------------------------------------

--------------------------------------------------------------------------------

--------------------------------------------------------------------------------

---------------------------------------------------------------------AAGGATAAGAA

AACCAAGGGTTAGA

>Eschrichtius_robustus

ATGGAACAATTTAGTCACCCTACATTTAACCCTCTC---AAAACCTTATGAAG---------------------------

--------------------------------------------------------------------------------

--------------------------------------------------------------------------------

--------------------------------------------------------------------------------

--------------------------------------------------------------------------------

------------------------------------------------GAGCCACTATTGCTGCTTCCGTTTT-------

--------------------------------------------------------------------------------

--------------------------------------------------------------------------------

--------------------------------------------------------------------------------

---------------------------------------------------------------------AAGGATAAGAA

AACCAAGGGTTAGA

>Hippopotamus_amphibius_

ATGGGAT--GTTAGTCACCCTACATTTAACCCTCCC---AAAACCTTATGAAG---------------------------

--------------------------------------------------------------------------------

--------------------------------------------------------------------------------

--------------------------------------------------------------------------------

--------------------------------------------------------------------------------

------------------------------------------------GAGCCACTATTGCTGTTTCCCCGTT-------

--------------------------------------------------------------------------------

--------------------------------------------------------------------------------

--------------------------------------------------------------------------------

---------------------------------------------------------------------AAAGATAAGAA

AACCAAGCTTCAGA

>Bos_taurus

ATGGGACAAGTTAGTCACCCTATATTTAACCCTCTC---AAAACCTTATGAAG---------------------------

--------------------------------------------------------------------------------

--------------------------------------------------------------------------------

--------------------------------------------------------------------------------

--------------------------------------------------------------------------------

------------------------------------------------GAACCACCACTGCCACTTCCATTTTTTCTTTT

TTTTAATTAATTTATTTTTTAATTGAAGGTTTATTGCTTTACAGAATTTTGTTGTTTTCTGTCAAACCTCAACATGAATC

AGCCATAGGTTTACATATATGCCCTCCCTTTTGAACCTCCCTCCTATCTCCCTCCCCATCCCACCTCTCTAGGTTGATAC

AGAGTCCCTGTTTGAGTTTTCTGAGCCATACAGCAAATTCCCATTGGCTATCTATTTTACATATGGTAATGTAAGTTTCC

ATGTTACTCTTTCCATACATCTCACCCTCTCCTCCCCTCTCCCCATGTCCATAATGCCGCTTCCATTTTAAAGATAAGAA

AACTAAGGTTCAGA

**Marker TP39**

>CHR2A_Ttr

---------------------------------------------------------GGGCTTCCCTGGTGGCGCAGTGG

TTGAGAGTCCGCCTGCCGATGCAGGGGACACGGGTTCGTGCCCCGGTCCGGGAAGATCCCACATGCCGCGGAGCAGCTAG

GCCCGTGAGCCATGGCCGCTGAGCCTGCGCGTCCGGAGCCTGTGCTCCGCAACGGGAGAGGCCACAACAGTGAGAGGCCC

GCGTACCGCAAAAAAAAAAAAAAAAAAA----------------------------------------------------

--------------------------------------------------------------------------------

--------------------------------------------------------------------------------

----------------------------------------------------------

>Tursiops_truncatus

AGCCAGTCCCAGGGGACATCGCTTCCAGTGCAATC---AAAACAACCATGTCC---GGGGCTTCCCTGGTGGCGCAGTGG

TTGAGAGTCCGCCTGCCGATGCAGGGGACACGGGTTCGTGCCCCGGTCTGGGAAGATCCCACATGCCGCAGAGCGGTTGG

GCCCGTGAGCCATGGCCGCTGAGCCTGCGCGTCCGGAGCCTGTGCTCCACAACTGGAGAGGCCACAGCAGTGAGAGGCCC

GCGTACCGCAAAAAAACAAAAAAAAAACAAA-------------AAAACAACCATGTCC---AG----------------

--------------------------------------------------------------------------------

--------------------------------------------------------------------------------

----------AACACGATCATATCCCTAGGAGTCATGGTCATAAGAAGAACCAAACCA

>Mesoplodon_bidens

AGCCAGTCCCAGGGGACATCGCTTCCAGTGCAATC---AAAACAACCACGTCC----GGGCTTCCCTGGTGGCGCAGTGG

TTGAGAGTCTGCCTGCCGATGCAGGGGACACGGGTTTGTGCCCCGGCCCGGGAAGATCCCACATGCCGTGGAGTGGCTGG

GCCCGTGAGCCATGGCCACTGAGCCTGCACGTCCGGAGCCTGTTCTGCGCGCTGGGAGAGGCCACAGCAGTGAGAGGCCC

ACGTACTGCAAAAAAAAAAAAAAAAAAAAAAAAAAATACAA---AAAACAGCCCTGTCC---AG----------------

--------------------------------------------------------------------------------

--------------------------------------------------------------------------------

----------AACACGATCACACCCCTACGAGTCATGGTCATAAGAAGAACCAAACCA

>Physeter_catodon

AGCCAGTCCCAGGGGACATCGCTTCCAGTGCAATC---AAAACAACCATGTCC---AGGGCTTCCCTGGTGGCGCAGTGG

TTGAGAGTCTGCCTGCCGATGCAGGGGACACGGGTTCGTGCCCCGGTCCGGGAAGATCCCACATGCCGCGGAGTGGCTGG

GCCCGTGAGCCATGGCCGCTGAGCCTGCGCGTCCGGAGCCTGTGCTCCGCAACGGGAGAGGCCACGACAGTGAGAGGCCC

GCGTACCGCAAAACAAACAAACAAACAAACAAAAAA-ACA----ACAACAACCATGTCC---AG----------------

--------------------------------------------------------------------------------

--------------------------------------------------------------------------------

----------AACACGATCACATCCCTACAAGTCATGGTCATAAGAAGAACCAAACCA

>Kogia_breviceps

AGCCAGTCCCAGGGGACATTGCTTCCAGTGCAATC---AGAACAACCATGTCC---AGGGCTTCCCTGGTGGCGCAGTGG

TTGACAGTCCGCCTGCTGATGCAGGGGATGCGGGTTCGTGCCCCGGACCGGGGAG-------------------------

--------------------------------------------------------------------------------

--------------------------------------------------------------------------------

--------------------------------------------------------------------------------

--------------------------------------------------------------------------------

----------------------------------------------------------

>Balaenoptera_acutorostrata

AGCCAGTCCCAGGGGACATTGCTTCCAGTGCAATC---AAAACAACCATGTCC---------------------------

--------------------------------------------------------------------------------

--------------------------------------------------------------------------------

--------------------------------------------------------------AG----------------

--------------------------------------------------------------------------------

--------------------------------------------------------------------------------

----------AACACGATCACATCCCTATGAGTCATGGTCATAAGAAGAACCAAACCA

>Eschrichtius_robustus

AGCCAGTTCCAGGGGACATCACTTCCAGTGCGACC---AAAACAACCATGTCC---------------------------

--------------------------------------------------------------------------------

--------------------------------------------------------------------------------

--------------------------------------------------------------AG----------------

--------------------------------------------------------------------------------

--------------------------------------------------------------------------------

----------AACACGATCACATCCCTATGAGTCACGGTCATAAGAAGAACCAAACCA

>Hippopotamus_amphibius

AGCCAACCCCAGTGGATATCACTTCCAGTGCAACC---AAAACGGCCATGTCT---------------------------

--------------------------------------------------------------------------------

--------------------------------------------------------------------------------

--------------------------------------------------------------GG----------------

--------------------------------------------------------------------------------

--------------------------------------------------------------------------------

----------AACAAGATGACATCCCTATGAGTCAGTGTCACAAGAAGAACCAAACCA

>Bos_taurus

AGCCAACTCCAGTGGCTATCGCTTCCAGTGCAATC---AAAATGACCGTGTCC---------------------------

--------------------------------------------------------------------------------

--------------------------------------------------------------------------------

--------------------------------------------------------------AGGGACTTCCCTGGTGGT

CCAGTGGCTAAGACCCCGTGCTCCCAATGCAGGGGACCGGGGTTCGATCCCTGTCAGGGAACTAGATCCCACATGCACAA

TAAGAATTCTATGCTGCAACTAAAGATCCTGATGCAAACTTGGGGCAGCCAAATAAATAAATAATTTAAAACACACACAG

CCGTGTCCAGAATAAAATCATGTCCCTAAGAGTCACTATAGCAAGAAGAACCAAACCA

**Marker TP40**

>CHR-2

--------------------------------------------------------------------------------

--------------------------------------------------------------------------------

--------------------------------------------------------------------------------

--------------------------------------------------------------------------------

--------------------------------------------------------------------------------

-------------------------------------------------------------GGG-CTTCCCTGGTGGCGC

AGTGGTTAAGAATCTGCCTGCCAATGCAGGGGACACGGGTTCGAGCCCTGGTCCGGGAAGATCCCACATGCCGCGGAGCA

ACTAAGCCCNTGCGCCACAACTACTGAGCCTGCGCTCTAGAGCCCGCGAGCCACAACTACTGAGCCCGCGTGCCACAACT

ACTGAAGCCCACGTGCCTAGAGCCTGTGCTCCGCAACAAGAGAAGCCACCGCAATGAGAAGCCCGNGCACCGCAACGAAG

AGTAGCCCCCNCTTGCCGCAACTAGAGAAAGCCCGCGCNCAGCAACGAAGACCCAACGCAGCC-----------------

--------------------------------------------------------------------------------

--

>Tursiops_truncatus

CACTGGG-GAAG--------------------------------------------------------------------

--------------------------------------------------------------------------------

--------------------------------------------------------------------------------

--------------------------------------------------------------------------------

--------------------------------------------------------------------------------

----------------CTGTCCCTGGGTTAGGTGTCTTT---AAGAACAAGATCCCAG---GGGACTTCCCTGGTGGCGC

AGTGGTTAAGAATCTGCCTGCCAACGCAGGGGACACGGGTTGGAGCCCTGGTCCAGGAAAATCCCACATGCCGCGGAGCA

ACTAAGCCCGTGCGCTACAACTATTGAGCCTGTGCTCTAGAGACCGCAAGCCACAACTACTG------------------

-----AGCCTGCGCACCTAGAGCCCATGCTCCACAACAAGAGAAGTCACTGCAGTGAGAAGCCTGCGCACCGCAACGAAG

AGCAGCCCCCGCTCGCCGCAACTAGAGAAAGCCCGCGCGCAGCAACGAAGACCCAACACAGCCAAAAATAAATCAATAAA

TAAACGTATA---AAGAACAAGATCCCCG---AATCTAGTGGTCTTTCCCCTGTCCCAAGCCACTTCCATTGCCTTCAGA

TC

>Mesoplodon_bidens

CACTGGG-GAAG--------------------------------------------------------------------

--------------------------------------------------------------------------------

--------------------------------------------------------------------------------

--------------------------------------------------------------------------------

--------------------------------------------------------------------------------

----------------CTGTCCCTGGGTTAGGTGTCTTT---AAGAACAAGATCCCCG---GGGACTTCCCTGGTGGCAC

AGTGGTTAAGAATCCGCCTGCCAACGCAGGGGACACGGGTTCGAGCCCTGGTCCAGGAAAATCCCACATGTCGCGGAGCA

ACTAAGCCCATGAGCTACAACTATTGAGCCTGCGCTCTAGAGCCCGTGAGCCA-AACTACTG------------------

-----AGCCTGCGCACCTAGAGCCTGTGCTCCA---CAAGAGGAGTCACTGCAATGAGAAGCCCGCACACCACAACGAAG

AGCAGCC---ACTCGCCACGACTAGAGAAAGCCCGCGCGCAGCAACGAAGACCCAACGCATCCAAAGATAAATCAATAAA

TAAATGTATA---AAGAACAAGACCCCCG---AATCCAGTGGTCTTTCC-CTGCCCCAAGCCACTTCCGTTGCCTACAGA

TC

>Physeter_catodon

CACTGGG-GAAG--------------------------------------------------------------------

--------------------------------------------------------------------------------

--------------------------------------------------------------------------------

--------------------------------------------------------------------------------

--------------------------------------------------------------------------------

----------------CTGTCCCTGGGTTAGGTGTCATT---AAGAACAAGATCCCCG---GGGACTTCCCTGGTGGCGC

AGTGGTTAAGAATCTGCCTGCCAACGCAGGGGACACGGGTTCGAGCCCTGGTCCAGGAAGATCCCACATGCCGCGGAGCA

ACTAAGCCCATGCGCTACAACTATTGAGCTTGTGCTCTACAGCCCGTGAGCCA-AACTACTG------------------

-----AGCCCGCGCGTCTAGAGCCTGTCCTCCAGAACAAGAGGAGCCACAGCAATGAGAAGCCCGCGCACCACAAC----

----------------------------------------------------CCAATGCAGCCAAAAATCAATCAATAAA

TAAATGTATA---AAGAACAAGATCCCCG---AATCCCGTGGTCTTTCCCCTGCCCCAAGCCACTTCCGTTGCCTTCAGA

TC

>Kogia_breviceps

CACTGGG-GAAG--------------------------------------------------------------------

--------------------------------------------------------------------------------

--------------------------------------------------------------------------------

--------------------------------------------------------------------------------

--------------------------------------------------------------------------------

----------------CTGTCCCTGGGTTAGGTGTCATT---AAGAACAAGATCCCCG---GGGACTTCCCTGGTGGAGC

AGTGGTTAAGAATCTGCCTGCCAACACAGGGGACACGGGTTCGAGCCCTGGTCCAGGAAGATCCCACATGCCGCGGAGCA

ACTAAGCCCATGCGCTACAACTATTGAGCTTGTGCTCTACAGCCCGTGAGCCA-AACTACTG------------------

-----AGCCCGCGCGTCTAGAGCCTGTCCTCCACAACAAGAGGAACCACTGCAACGAGAAGCCCATGCACCACAAC----

----------------------------------------------------CCAATGCAGCCAAAACTCAATCAATCAA

TAAATGTATA---AAGAACCAGATCCCCG---AATCCAGTGGTCTTTCCCCTGCCCCAAGCCACTTCTGTTGCCTTCAGA

TC

>Balaenoptera_acutorostrata

CACTGGG-GAAA--------------------------------------------------------------------

--------------------------------------------------------------------------------

--------------------------------------------------------------------------------

--------------------------------------------------------------------------------

--------------------------------------------------------------------------------

----------------CTGTCCCTGGGTTAGGTGTCTTT---AAGAACAAGATCCCCA----------------------

--------------------------------------------------------------------------------

--------------------------------------------------------------------------------

--------------------------------------------------------------------------------

--------------------------------------------------------------------------------

--------------------------------AATCCAGTGGTCTTTCCCCTGCCTCAAGCCACTTCCATTGTCTTCAGA

TC

>Eschrichtius_robustus

CACTGGG-GAAG--------------------------------------------------------------------

--------------------------------------------------------------------------------

--------------------------------------------------------------------------------

--------------------------------------------------------------------------------

--------------------------------------------------------------------------------

----------------CTGTCCCTGGGTTAGGTGTCTTT---AAGAACAAGATCCCCA----------------------

--------------------------------------------------------------------------------

--------------------------------------------------------------------------------

--------------------------------------------------------------------------------

--------------------------------------------------------------------------------

--------------------------------AATCCAGTGGTCTTTCCCCTGCCCCAAGCCACTTCCGTTGTCTTCAGA

TC

>Hippopotamus_amphibius

AATTAGGGGAAG--------------------------------------------------------------------

--------------------------------------------------------------------------------

--------------------------------------------------------------------------------

--------------------------------------------------------------------------------

--------------------------------------------------------------------------------

----------------CTGCCCCTGGCTTAGGTGTCTTT---AAAAACAAGATCTCCA----------------------

--------------------------------------------------------------------------------

--------------------------------------------------------------------------------

--------------------------------------------------------------------------------

--------------------------------------------------------------------------------

--------------------------------AATCCAGTGGTCTTTCCCCTGCTCCAAGCCACTTCCGTTGTCTTCAGA

TG

>Bos_taurus

AAATAGGCGAAGGCACTGCTGGACTCTGCTCAGTCGTGTCCAGATCTTTGTGACTCCATGGACTGTAGCCTGCCAGCCTC

CTCTGTCCATGGGGATTCTCCAGGTAAGAACACTGGAGTGGGTTGCCATGCCCTCCTCCAGGGGCCCTTAGATTGCTAAG

TCGTTTCAGTCGTGTCCGACTCTGTGGGACCCCATAGACGGCAGCCCACCGGGCTCCCCCATCCCTGGGATTCTCCAGGC

AAGAACACTGGAGTGGGTTGCCATTTCCTTCTCCAATGCATGAAAGTGAAAAGTGAAAGTGAAGCCACTCAGTCGTGTCC

GACTCTTCTCGACCCCATGGACTGCAGCCCACCAAGCTCCTCGGTCCATGAGATTTTCCAGGCAAGAGTACTGGAGTGGG

GTGCCATTGCCTTCTCCGGCCCCTAGATTAGGTGTCTTT---AAAAACAAGATATCCA----------------------

--------------------------------------------------------------------------------

--------------------------------------------------------------------------------

--------------------------------------------------------------------------------

--------------------------------------------------------------------------------

--------------------------------AATCCAGTGG--------------------------------------

--

**Marker TP42**

>CHR-2

---------------------------------------------------------GGGCTTCCCTGGTGGCGCAGTGG

TTAAGAATCTGCCTGCCAATGCAGGGGACACGGGTTCGAGCCCTGGTCCGGGAAGATCCCACATGCCGCGGAGCAACTAA

GCCCNTGCGCCACAACTACTGAGCCTGCGCTCTAGAGCCCGCGAGCCACAACTACTGAGCCCGCGTGCCACAACTACTGA

AGCCCACGTGCCTAGAGCCTGTGCTCCGCAACAAGAGAAGCCACCGCAATGAGAAGCCCGNGCACCGCAACGAAGAGTAG

CCCCCNCTTGCCGCAACTAGAG-AAAGCCCGCGCNCAGCAACGAAGACCCAACGCAGCC---------------------

--------------------------------------------------------------------------------

---

>Tursiops_truncatus

AAACAGATGTACCCT-GATATTTGATATTTCAGAAATC---AGAGAAGTTTTCA---GGGCTTCCCTGGTGGCGCAGTGG

TTAAGAATCCGCCCGCCAATGCAGGGGACACGGGTTCGAGCCCTGGTCCAGGAAGATCCCACGTGCCACGGAGCAACTAA

GCCTGTGCGCCACAACTACTGAGCCCGCGCTCTAGAGCCCGCGAGCCACAACTACTGAGCCCACGTGCCACAACTACTGA

AGCCCGCGTGCCTAGAGCCCGTGCTCCACAACAA-AGAAGACACCGCAATGAGAAGCCTGCGCACCGCAAGGAAGAGTAG

CCCCCGCTCGCCACAACTAGAGAAAAGCCCGCATACAGCAATGAAGACCCAACACAGCCAAAAATTAAAAAATAAATTAA

TTTTAAAA----AA---AAAGAAGTTTTCA---TTAGAAAAATCAGAACTCAGACTTCCTTACACTCTTTTTAGGGTTTA

GGG

>Mesoplodon_bidens

AAACAGATATACCCT-GATATTTGATATATCAGAAATC---AGAGAAGTTTTCA---GGGCTTCCCTGGTGGTGCAGTGG

TTAAGAATCCGCCCGCCAATGCAGGGGGCATGGGTTCGAGCCCTGGTCCAGGAAGATCCCACATGCCGCAGAGCAACTAA

GCCCGTGCGCCACAACTACTGAGCCTGCGCTCTAGAGCCTGCGAGCCACAGCTACTGAGCCCACGTGCCACAACTACTGA

AGCCCACGTGCCTAGAGCCTGTGGTCCACAACAAGAGAAGCCACCACAATGAGAAGCCTGTGCACTGCAATGAAGAGTAG

CCCCCGCTCGCCACAACTAGAGAAAAGCCCACATATAGCAACAAAGACCCAACACAGCCAAAAAT--------AAATAAA

TTTAAAAA----AA---AAAGAAGTTTTCA---TTAGAAAAATCAGAACTCAGACTTCCTTACACTCTTTTTAGAGTTTA

GGG

>Physeter_catodon

AAACAGATGTACCTC-GATATTTGATATTTCAGAAATC---AAAGAAGTTTTCA---GGGCTTCCCTGGTTGCGCAGTGG

TTAAGAATCCGCCTGCCAATGCAGGGGACATGGGTTCGAGCCCTGGTCCGGGAAGACCCCACATGCCGCAGAGCAACTAA

GCCCGTGCGCCACAACTACTGAGCCTGCGCTCTAGAGCCCGCAAGCCACAACTACTGAGCCTACGTGCCACAACTACTGA

AGCCCGCATGCCTAGAGCCCGTGCTCCACAACAAGAGAAGCCACCGCAATGAGAAGCCTGCGCACCACAACGAAGAGTAG

CCCCCCCTCGCCACAACTAGAGAAAAGCCCACATACAGCAGCGAAGACCCAACACAGCCAAAAATTAAAAAATAAATAAA

TTTAAAAATAAAAA---AAAGAAGTTTTCA---TTAGAAAAATCAGAACTCAGACTTCCTTACACTCTTTTTAGGGTTTA

GGG

>Kogia_breviceps

AAACAGATGTACCTC-GATATTTGGTATTTCAGAAACC---ACAGAAGTTTTCA---GGGCTTCCCTGGTTGCACAGCGG

TTAAGAATCCGCCTGCCAATGCAGGGGACACGGGTTCGAGCCCTGGTCCGGGAAGATCCCACATGCCGCGGAGCAACTAA

GCCCGTGCACCACAGCTACTGAGCCTGCGCTCTAGAGCCCGCGAGCCACAACTACTGAGCCCACGTGCCACAACTACTGA

AGCCCACATGCCTAGAGCCCGTGCTCCACAACAAGAGAAGCCACTGCAATGAGAAGCCTGCGCACCGCAACAAAGAGTAG

CCCCCCCTCGCCACAACTAGAGAAAAGCCTGCATCCAGCAGCGAAGACCCAACACAGCCAAAAATTAAAAAATAAATACA

CTTTAAAATAAAGA---AAAGAAGTTTTCA---TTAGAAAAATCAGAACTCAGACTTCCTTACACTCTTTTTAGGGGTTA

GGG

>Balaenoptera_acutorostrata

AAACAGATGTACCCCAGATATTTGATATTTCAGAAATC---AAAGAAGTTTTCA--------------------------

--------------------------------------------------------------------------------

--------------------------------------------------------------------------------

--------------------------------------------------------------------------------

--------------------------------------------------------------------------------

---------------------------------TTAGAAAAATCAGAACTCAGACTTTCTTACACTCTTTTTAGGGTTTA

GGG

>Eschrichtius_robustus

AAACAGATGTACCCCAGATATTTGATATTTCAGAAATC---AAAGAAGTTTTCA--------------------------

--------------------------------------------------------------------------------

--------------------------------------------------------------------------------

--------------------------------------------------------------------------------

--------------------------------------------------------------------------------

---------------------------------TTAGAAAAATCAGAACTCAGACTTTCTTACACTCTTTTTAGGGTTTA

GGG

>Hippopotamus_amphibius

AAACAGATATACCCC-GATATTGGATATTTCAGAAATC---AGAGAAGTTCTCA--------------------------

--------------------------------------------------------------------------------

--------------------------------------------------------------------------------

--------------------------------------------------------------------------------

--------------------------------------------------------------------------------

---------------------------------TTAGAAAAATCAGAACTCAGACTTCCTTACACAGACTTTAGGGTTTA

GGG

>Bos_taurus

AAACAGATATACCCC-AATATTTGATATTTCAGAAATC---AAAGAAGTTTTCA--------------------------

--------------------------------------------------------------------------------

--------------------------------------------------------------------------------

--------------------------------------------------------------------------------

--------------------------------------------------------------------------------

---------------------------------TAAGAAAAATCAAAACTCAGACTTCCTTACACTCTCTTTAGAGTTTA

GGG

**Marker TP45**

>CHR2A_Ttr

-------------------------------------------------------------------------------G

GGCTTCCCTGGTGGCGCAGTGGTTGAG--AGTCCGCCTGCCGATGCAGGGGACACGGGTTCGTGCCCCGGTCCGGGAAGA

TCCCACATGCCGCGGAGCAGCTAGGCCCGTGAGCCATGGCCGCTGAGCCTGCGCGTCCGGAGCCTGTGCTCCGCAACGGG

AGAGGCCACAACAGTGAGAGGCCCGCGTACCGCAAAAAAAAAAAAAAAAAAA----------------------------

--------------------------------------------------

>Tursiops_truncatus

GAGCTC---------------------AGCTAGTCTT-ATGGCTATGTGCGGTTT---AAAAAA-TCTAGAGGAGG---G

GGCTTCCCTGGTGGCGCAGTGGTTGAG--AGTCCGCCTGCCGATGCAGGGGACGCAGGTTCGTGCCCCGGTCCGGGAAGA

TCCCACATGCCGCGGAGCGGCTGGGACCGTGAGCCATGGCCGCTAAGCCTGCGCGTCCGGAGCCTGTGCTCCATAATGGG

AGAGGCCACAGCGGTGAGAGGCCTGCGTACCACA------AAAAAAAAAA-----AAAAAAATCTAGACGAGG-------

AAAAATGGATGGTTGTGGAAATTTTGTCTAGTTGCATATTAATGAATGTT

>Mesoplodon_bidens

GAGCTC---------------------AGCTAGTCTT-ACGGTTATGTGTGGTTC---AAAAAA-TCTAGAGGAGG---G

GGCTTCCCTGGTGGCACAGTGGTTGAG--AGTCCCCCTGCCGATGCAGGGGACACGGGTTCGTGCCCCGGTCCGGGAAGG

TCCCACACGCCGCGGAGCGGCTGGGCCCGTGAGCCATGGCCGCTGGGCCTGCGCGTCCGGAGCCTGTGCTCTGCAACGGG

AGAGGCCACAACAGTGAGAGGCCCGCGTACCGCAAAAACTAAAAACTAAA-----AATAAAATCTAGAGGAGG-------

AAAAATGGATGGTTCTGGAAATTTTGTCTATTTGCATATTAATGAATGTT

>Physeter_catodon

GAGCTC---------------------AGCTAGTCTT-ACGGCTATGTGTGGTTT---AAAAAA-TCTAGAGGATG----

GGCTTCCCTGGTGGCGCAGTGGTTGAG--CGTCCGCCTGCCGATGCAGGCGACACGGGTTCGTGCCCCGGTCCGGGAAGT

TCCCACGTGCCGCGGAGCGGCTGGGCCCGTGAGCCATGGCCGCTGAGCCTGCGCGTCCGGAGCCTGTGTTCCGCGACGGG

AGAGGCCACAACAGTGAGAGGCCCGCGTACCGCA------AAAAAAAAAA-----AAAAAAAACTAGAGGAGG-------

AAAAATGGATGGTTCTGGAAATTTTGTCTATTTGCATATTAATGAATGTT

>Kogia_breviceps

GAGCTC---------------------AGCTAGTCTTTACGGCTATGTGTGGTTT---AAAAAA-TCTAGAGGATG----

GGCTTCCCTGGTGGCGCAGTGGTTGAGTCTGTCTGCCTGCCGATGCAGGGGACGCGGGTTCATGCCCCGGTCCGGGAAGA

TGCCACGTGCCGCGGAGCGGCTGGGCCCGTGAGCCATGGCCGCTGGGCCTGCGCGTCCAGAGCCTGTGCTCCGCAACGGG

AGAGGCCATAACAGTGAGAGGCCCGCGTACCGCAAAAAAAAAAAAAAAAA-----AAAAAAATCTAGAGGAGG---TTTT

AAAGATGGATGGTTCTGGAAATTTTGTCTATTTGCATATTAATGAATGTT

>Balaenoptera_acutorostrata

GAGCTC---------------------AGCTATTCTT-ACAGCTATGTGTGGTTT---AAAAAAATCTAGAGGAGG----

--------------------------------------------------------------------------------

--------------------------------------------------------------------------------

--------------------------------------------------------------------------------

AAAAATGGATGGTTCTGGAAATTTTGTCTATTTGCATATTAATGAATGTT

>Eschrichtius_robustus

GAGCTC---------------------AGCCAGTCTT-ACAGCTATGTGTGGTTT---AAAAAAATCTAGAGGAGG----

--------------------------------------------------------------------------------

--------------------------------------------------------------------------------

--------------------------------------------------------------------------------

AAAAATGGATGGTTCTGGAAATTTTGTCTATTTGCATATTAATGAATGTT

>Hippopotamus_amphibius

GAGCTCCAGCCTGTCTGCTTACACTTTAGCTAGCCTC-ACAGCTATGTGTGGTTT---AAAAAA-TCTAGAGGAGT----

--------------------------------------------------------------------------------

--------------------------------------------------------------------------------

--------------------------------------------------------------------------------

AAAACTGGATGGTTCCAGAAATTTTATCTATTTGCATATTAATAAATGTT

>Bos_taurus

GCACTTCAGCTTGTCTGCTTACACTTTAGCTAGTCTT-ATGGCTACATGTGGTTT---CAAATA-TCTAGAGGGGT----

--------------------------------------------------------------------------------

--------------------------------------------------------------------------------

--------------------------------------------------------------------------------

CAAACTGGATGGTTCTGGAAATTTTGCCTCTTTGCATGTCAA-AAATGTT

**Marker TP46**

>CHR-2B

--------------------------------------------------------------------GGGACTTCCCTG

GTGGTCCAGTGGTTAAGAATCTGCCTGCCAATGCAGGGGACACGGGTTCAATCCCTGGTCCGGGAAGATCCCACATGCCG

TGGAGCAACTAAGCCCGTGCGCCACAACTACTGAGCCTGTGCTCTAGAGCCCGCGAGCCGCAACTACTGAAGCCCGCGCG

CCCTAGAGCCCGTGCTCTGCAACAAGAGAAGCCACCGCAATGAGAAGCCCGCGCACCGCAGCTAGAGAGTAGCCCCCGCT

CGCCGCAACTAGAGAAAGCCCNCGCGCAGCAACGAAGACCCAGCACAGCCAAAAATAAATAAATAAATAAA---------

--------------------------------------------------------------------------------

------

>Tursiops_truncatus

CAAGTCGGGGTGGAGC------------GTGTGCTTGAGGTTCATTT---AAAAGAGCCAAAGCA----GGGCTTCCCTG

GTGGCGCAGTGGTTAAGAAT------------------------------------------------------------

--------------------------------------------------------------------------------

-------------------------------------------------------------------------CCCCGCT

CACCGCAACTAGAAAAAGCCCCTGCGTAGCAATGAAGACCCAGCGCAGCCAAAAATAAATAA-ATAAA------------

----------AATT---AAAAGAGCCAAAGCA---GAACAAAGACGCTAGAAGACCCGCTAAAGGAG-TGGTTTGAACTT

AGGCTA

>Mesoplodon_bidens

CAAGTCGGGATGGAGC------------GTGTGCTTGAGGTTCATTT---AAAAGAGCCAAAGCA----CGGCTTCCCTG

GTGGCGCAGTGGTTAAGAAT------------------------------------------------------------

--------------------------------------------------------------------------------

-------------------------------------------------------------------------CCCCACT

CGCTGCAACTAGAGAAAGCCCCTGTGCAGCAATGAAGACCTAGCTCA-CCAAAAATAAATAAATTAAATTAATTAAATTT

AAAAAAAGAAAATT---AAAAGAGCCAAAGCA---GAACAAAGACTCTAGAAGACCCGCTAAAGGAG-TGGTTTGAACTT

AGGCTA

>Physeter_catodon

CAAGTCGGGATGGAGC------------GTGTGCTTGAGGTTCATTT---AAAAGAGCCAAAGCA----GGGCTTCCCTG

GTGGCGCAGTGGTTAAGAAT------------------------------------------------------------

--------------------------------------------------------------------------------

-------------------------------------------------------------------------CCCCGCT

-GCCGCAACTAGAGAAAGCCCCTGCGCAGCAATGAAGACCCAGCGCAGCCAAAACTAAATAA-ATAAAATAAATTTTTTT

AAAAATAAACAAAT---AAAAGAGCCAAAGCA---GAAAAAAGACTCTAGAAGACCCGCTAAAGGAG-TGGTTTGAACTT

AGGCTA

>Kogia_breviceps

CAAGTCGGGATGGAGC------------GTGTGCTTGAGGTTCATTG---AAAAGAGCCAAAGCA----GGGCTTCCCTG

GTGGCGCAGTGGTTGAGAAT------------------------------------------------------------

--------------------------------------------------------------------------------

-------------------------------------------------------------------------CCCCGCT

CGCCGCAACTAGAGAAAGCCCCTGCGCAGCAATGAAGACCCAGCGCAGCCAAAAATAAATAA-ATAGAATAAATTTTTTT

AAAAATAAATAAAT---AAAAGAGCCAAAGCA---GAAAAAAGACTCTAGGAGACCCGCTAAAGGAG-TGGTTTGAACTT

GGGCTA

>Balaenoptera_acutorostrata

CAAGTCGGGATGGCGCTGGCTGCTGGGAGTGTGCCTGAGGTTCATTT---AAAAGAGCCAAAGCA---------------

--------------------------------------------------------------------------------

--------------------------------------------------------------------------------

--------------------------------------------------------------------------------

--------------------------------------------------------------------------------

-----------------------------------GAACGAAGACTCTAGAAGACCCGCTAAAGAAG-TCGTTTGAACTT

AAGCTA

>Eschrichtius_robustus

CAAGTCGGGATGGCGCTGGCTGCTGGGAGTGTGCCTGAGGTTCATTT---AAAAGAGCCAAAGCA---------------

--------------------------------------------------------------------------------

--------------------------------------------------------------------------------

--------------------------------------------------------------------------------

--------------------------------------------------------------------------------

-----------------------------------GAACAAAGACTCTAGAAGACCCGCTAAAGAAG-TCGTTTGAACTT

AAGCTA

>CHRL

---------------------------------------------------------------------GGACTTCCCTG

GTGGTCCAGTGGCTAAGACT------------------------------------------------------------

-------------------------------------------------------------------------CCACGCT

CCCAATGCAGGGGGCCCAGGTTCGATCCCTGGTCAG-GGAACTAGATCCCACATGC----TACAACTAAGA-GTTCGCAT

-GCCACAACTAAAGAT--CCCATGTGC-GCAACTAAGACCCGGCACAGCCAAA-TAAATA--------------------

--------------------------------------------------------------------------------

------

>Hippopotamus_amphibius

CAAGTCGGGATGCAGCTGGCTGATGGGAGCGTGTTTGAGGTTCATTT---AAAAGAGCCAAGGCA---GGGGTTTCCCTG

GTGGTCCAGTGGGTAAGGCT------------------------------------------------------------

-------------------------------------------------------------------------CTGTGCT

CCCAACATAGGGAGCC-AGGTTCGATCCCTGGTCGGACAATTTAGATCCTGTACGCATGCCACAACTAAGAAGTCCACAT

-GCTGCAACTGAAGAT--CCCACATGCCGAAACTAAGACCCGGCACAGCAAAAATAAATAAATATTTTTTTAAAATCCAT

GTTTCTTAAAAA-----AAAAGAGCCAAAGCA---GAACAAAGATTCTAGAAGACCCACTAAAGAAGCTGGTTTGAACTT

GAGCTA

>Bos_taurus1

CAAATCGGGATGTAGCTGGCTGCTGGGAGTGTGCCTGAGGTTCACGT---TAAAAAGCCAAAGCA---------------

--------------------------------------------------------------------------------

--------------------------------------------------------------------------------

--------------------------------------------------------------------------------

--------------------------------------------------------------------------------

-----------------------------------GAACAAAGACTCTAGAACACCTGCTAAGAGAGATGGTTTGAGCTT

AAGCTA

>Bos_taurus2

CAAATCGGGATGTAGCTGGCTGCTGGGAGTGTGCCTGAGGTTCACGT---TAAAAAGCCAAAGCA---------------

--------------------------------------------------------------------------------

--------------------------------------------------------------------------------

--------------------------------------------------------------------------------

--------------------------------------------------------------------------------

-----------------------------------GAACAAAGACTCTAGAACACCTGCTAAGAGAGATGGTTTGAGCTT

AAGCTA

**Marker TP54**

>CHR-2B

--------------------------------------------------------GGGACTTCCCTGGTGGTCCAGTGG

TTAAGAATCTGCCTGCCAATGCAGGGGACACGGGTTCAATCCCTGGTCCGGGAAGATCCCACATGCCGTGGAGCAACTAA

GCCCGTGCGCCACAACTACTGAGCCTGTGC-TCTAGAGCCCGCGAGCCGCAACTACTGAAGCCCGCGCGCCCTAGA-GCC

CGTGCTCTGCAACAAGAGAAGCCACCGCAATGAGAAGCCCGCGCACCGCAGCTAGAGAGTAGCCCCCGCTCGCCGCAACT

AGAGAAAGCCCNCGCGCAGCAACGAAGACCCAGCACAGCCAAAAATAAATAAATAAATAAA-------------------

--------------------------------------------------------------------------------

----------------------------------

>Tursiops_truncatus

CGAGTGCTAGCTTTTTCCAGGTACACATTGAGTTCCCT---AAAAACAATTGA---GGGGCTTCCCTGGTGGCGCAGTGG

TTGAGAATCTGCCTGCCAATGCAGGGGACACGGGTTCGAGCCCTGGTCTGGGAGGATCCCACATGCTGCGGAGCAACTAG

GCCCGTGAACCACAACTGCTGAGCCTGTGCGTCTGGAGCCTGTGCTTCGCAACAAGAGAGG-CCGCGATAGTGAGAGGCC

C--------------------------TAGTGAGAGGCCCGTGCACCGC-GATGAAGAGTGGCCCCCGCTTGCCGCAACT

AGAGAAAGCCCTCGCACAGAAACGAAGACCCAACACAGCCA----TAAATAAATAAATAATTAAAACCACATATTGTAAA

AAA--------------ACAAAACAAAA-------------------AAACCCAATTGA---TTA--CCAAGGAAACCTA

ACAGGATAATAAAAAGGAGAGTTGGGATTTAGGT

>Mesoplodon_bidens

CGAGTGCTAGCTTTTCCCAAGTACACATTGAGTTCACT---AAAAACAATTGA---GGG-CTTCCCTGGTGGCGCAGTGG

TTGAGAATCTGCCTGCCAGTGCAGGGGACACGGGTTCGAGCCCTGGTCTGGGAAGATCCCACGTGCCGCGGAGCAACTAG

GCCCGTGAGCCACAACTGCTGAGCCTG---------------TGCTCCGCAACGGGAGAGG-CCGCGA------------

---------------------------TAGTGAGAGGCCCGCGCACCGC-GATGAAGAGTGGCCCCCGCTCGCCGCAACT

AGAGAAAGCCCTCGCACAGAAATGAAGACCCAGCACAGCCA----TAATTAATTAATTAATTAAGACCACATATTGTAAA

ACA---------------AAAAACAAA--------------------ACAACCAATTGA---TTA--CCAAGGAAACCTA

ACAGGATAATAAAAAGGAGAGTTGGGATTTAGGT

>Physeter_catodon

CGAGTGCTAGCTTTTTCCAAGTACACATTGAGTTCACT---AAAAACAACTGA---GGGGCTTCCCTGGTGGCGCAGTGG

TTGAGAATCTGCCTGCCAGTGCAGGGGACACGGGTTCAAGTCCTGGTCTGGGAAGATCCCACATGCCGCAGAGCAACTAG

GCCCGTGTGCCACAACTACTGAGCCTGCGCCTCTGGAGCCTGTGCTCCGCAACA-GAGAGG-CCGCGA------------

---------------------------TAGTGAGAGGCCCGCGCACTGC-GATGAAGAGTGGCCCCCGCTTGCTGCAACT

AGAGAAAGCCCTCGCACAGGAACGAAGACCCAACACAGCCAAAAATAAATAAATAATTAATTAAGACCACATATCGTGAA

AAAAAAAAAAAACAACAAAAAACCAAAAGACAAAACAAAACCAA---AAAAACAATTGA---TTA--CCAAGGAAACCTA

ACAGGATAATAAAAAGGAGAGTTGGGATTTGGGT

>Kogia_breviceps

CGAGTGCTAACTTTTTCCAAGTACACATTGAGTTCACT---AAAAACAATTGA---GGGGCTTCCCTGGTGGCGCAGTGG

TTGAGAGTCTGCCTGCCAATGTAGGGGATGTGGGTTCGTGCCCGGGTCCGGGAAGATCCCACATGCCGCAGAGCGGCTGG

GCCCGTGTGCCACAACTACTGAGCCTGTGTCTCTGGAGCCTGTGCTCTGCAACAAGAGAGG-CTGCGG------------

---------------------------TAGTGAGAGGCCCGCGCGCTGC-GATGAAGAGTGGCCCCCACCTGCCACAACT

AGAGAAAGCCCTCACACAGAAACGAAGACCCAACACAGCCAAAAATAAATAAATAAATAATTAAGACCACATATTGTGAA

AAA---------------AAACCCAAAAGACAAAACAAAACAAA---AAAAACAATTGA---TTA--CCAAGGAAACCTA

ACAGGATAATAAAAAGGAGAGTTGGGATTTAGGT

>Balaenoptera_acutorostrata

CGAGTGCTAGCTTTTTCCAAGTACGCATTGAGTTCACT---AAAAACAATTGA---------------------------

--------------------------------------------------------------------------------

--------------------------------------------------------------------------------

--------------------------------------------------------------------------------

--------------------------------------------------------------------------------

--------------------------------------------------------------TTA--CCAAGGAAACCTA

ACAGGATAATAAAAAGGAGAGTTGCAATTTAGGT

>Eschrichtius_robustus

CGAGTGCTAGCTTTTTCCAAGTACACATTGAGTTCACT---AAAAACAATTGA---------------------------

--------------------------------------------------------------------------------

--------------------------------------------------------------------------------

--------------------------------------------------------------------------------

--------------------------------------------------------------------------------

--------------------------------------------------------------TTA--CCAAGGAAACCTA

ACAGGATAATAAAAAGGAGGGTTGCGATTTAGGT

>Hippopotamus_amphibius

TGAGTGCAAGCT----CTAAGTGCGCACTGAGTTCACT---AAAAACAATCAG---------------------------

--------------------------------------------------------------------------------

--------------------------------------------------------------------------------

--------------------------------------------------------------------------------

--------------------------------------------------------------------------------

--------------------------------------------------------------TTA--CCAAGGAAACCTA

ACAGGATAATACAAAG---AGTTGGGATTTAGAT

>Bos_taurus

CAAGAGCTCGCTTTTTCCAGGTACAC-----------T---TAAAACAACCGA---------------------------

--------------------------------------------------------------------------------

--------------------------------------------------------------------------------

--------------------------------------------------------------------------------

--------------------------------------------------------------------------------

--------------------------------------------------------------TTATATCAGGGAAACCGG

ACAGGATAATAAAGAGGAGAGTTGGGAC------

**Marker TP55**

>CHR-2A

--------------------------------------------------------GGGGCTTCCCTGGTGGCTCAGTGG

TAAAGAATCCGCCTGCCAATGCAGGAGACACGGGTTCGATCCCTGGTCCGGGAAGATCCCACATGCCGCGGAGCAACTAA

GCCCGTGCGCCACAACTACTGAGCCTGTGCTCTAGAGCCCGGGAGCCGCAACTACTGAAGCCCACGCGCCCTAGAGCCCG

TGCTCCGCAACAAGAGAAGCCACCGCAATGAGAAGCCCGCGCACCGCAACTAGAGAGTAGCCCCCGCTCGCCGCAACTAG

AGAAAAGCC-CGCGCAGCAACGAAGACCCAGCAC-AGCCAAAAATAAATAAATAAATAAA--------------------

-----------------------------------------------------------------

>Tursiops_truncatus

AATTCCCACACAACTTTTAAAGACAATTGAGCTTT---AAAATTTACAATTGT---GGGGCTTCCCTGGTGGCGCAGTGG

TTGAGAGTCTGCCTGCCAATGCAGGGGACACGGGTTCGAGCCCTGATCTGGGAGGATCCCACATGCCGCGGAGCAACTGG

GCCCGTGAGCCACAACTACTGAGCCTGCGCG--------------------------------------TCTGGAGCCTG

TGCTCCGCAACAAGAGAGGCCGCG-----GAGAGGCCCGCGC--------------GTGACCCCCGCTCGCCGCAACTGC

AGAAAGCCCTCGCACAGAAACGAAGACCCAACAC-ACCCAAAAATAAATAAATAAATAAATAAATTTTTTAAAA---AAA

ATTTACAATTGA---GATCTAGCTGCAAATCATATTGACTGACATGGGTGTCAGTAATATATTGA

>Mesoplodon_bidens

AATTCCCACACAACTTTTAAAGACAATTGAGCTTT---AAAATTTACAATTGT---GGGGCTTCCCTGGTGGCGCAGTGG

TTGAGAGTCTGCCTGCCAATGCAGGGGACACGGGTTTGAGCCCTGATCTGGGAGGATCCCACGTGCCGCGGAGCAACTGG

GCCAGTGAGCCACAACTACTAAGCCTGCACA--------------------------------------TCTGGAGACTG

TGCTCCGCAATAAGAGAGGCCGCGACAGTGAGAGGCCCGCGCACCGCGA-TGAAGAGTGGCCCCC-CTCGCCACAACTGC

AGAAAACCCTTGCACAGAAATGAAGACCCAACAC-AGCCAAAAATAAATAAATAAATAAATTAATTTTA--------AAC

AATTACAATTGA---GCTCCAGCTGCAAATCATATTGACTGACATGGGTGTCAATAATATATTGA

>Physeter_catodon

AATTCCCACACAACTTTTAAAGACAATTGAGCTTT---AAAATTTACAATTGC---GCGGCTTCCCTGGTGGCGCAGTGG

TTGAGAGTCGGCCTGCCAATGCAGGGGACACGGGTTCGAGCCCTGATCTGGGAAGATCCCACATGCCGCGGAGCAACTGG

GCCCGTGAGCCACAACTACTGAGCCTGCGCG--------------------------------------TCTGGAGCCTG

TGCTCCGCAACAAGAGAGGCGGCAACAGTGAGAGGCCCGCGCACCGCGA-TGAAGAGTGGCGCCCGCTCGCCGCAACTGC

AGAAAGCCCTCGCACAGAAACAAAGACCCAACACAAGCCAAAAATAAATAAATAAGTTAAAAAA-------------AAA

ATTTACAATTGA---GCTCTAGCTGCAAATCATATTGACTGACATGGGTTTCAGTAATATATTGC

>Kogia_breviceps

AATTCCCACACAACTTTTAAAGACAATTGAGCTTT---AAAATTTACAATTGC---GGGGCTTCCCTGGTGGCGCAGTGG

TTGAGAGTCTGCCTGCCAATACAGGGGACACGGGTTCGAGCCCTGGTCTGGGAAGATCCCACATGCCGCGGAGCAACTGG

GCCCGTGAGCCACAACTACTGAGCCTGCGCG--------------------------------------TCTGGAGCCTG

TGCTCCGCAACAAGTGAGGCCGCGACAGTGAGAGGCCCGCGCACCGCGA-TGAAGAGTGGCCCCCGCTCGCCGCAACTAG

AGAGAGCCCTCACGCGGAAGAAAAGACCCAACACAAACCAAAAATAAATAAATAAGTTTAAAA--------------AAA

ATTTACAATTGA---GCTCTAGCTGCAAATCATATTGACTGACATGGGTGTCAGTAATATACTGA

>Balaenoptera_acutorostrata

AATTCCCACACAACTTTTAAAGACAATTGAGCTTT---AAAATTTACAATTGA---------------------------

--------------------------------------------------------------------------------

--------------------------------------------------------------------------------

--------------------------------------------------------------------------------

--------------------------------------------------------------------------------

---------------GCTCTAGCTGCAAATCATATTGACTGACGTGGGTGTCAGTAATATACTGA

>Eschrichtius_robustus

TATTCCCACACAACTTTTAAAGACAATTGAGCTTT---AAAATTTACAATTGA---------------------------

--------------------------------------------------------------------------------

--------------------------------------------------------------------------------

--------------------------------------------------------------------------------

--------------------------------------------------------------------------------

---------------GCTCTAGCTGCAAATCATATTGACTGACGTGGGTGTCAGTAATATACTGA

>Hippopotamus_amphibius

CTGTCCAACATAACTTTTAAAGACA---TAACAAT---CAAATTTACAATTGA---------------------------

--------------------------------------------------------------------------------

--------------------------------------------------------------------------------

--------------------------------------------------------------------------------

--------------------------------------------------------------------------------

---------------GCTTTAGCTGCAAAGCATATTGACTGACATCAGTGTCCGTAACATATTGA

>Bos_taurus

TATTTCCAC-TAACTTTTAAAGACA---TAACAAT---CAAATTTACAATTGA---------------------------

--------------------------------------------------------------------------------

--------------------------------------------------------------------------------

--------------------------------------------------------------------------------

--------------------------------------------------------------------------------

---------------GCTCTAGGTCCAAAATGTAT----TGACATTGGTGTCCATAATATATTGA

**Marker TP56**

>CHR-2B

-----------------------------------------------------------------GGGACTTCCCTGGTG

GTCCAGTGGTTAAGAATCTGCCTGCCAATGCAGGGGACACGGGTTCAATCCCTGGTCCGGGAAGATCCCACATGCCGTGG

AGCAACTAAGCCCGTGCGCCACAACTACTGAGCCTGTGCTCTAGAGCCCGCGAGCCGCAACTACTGAAGCCCGCGCGCCC

TAGAGCCCGTGCTCTGCAACAAGAGAAGCCACCGCAATGAGAAGCCCGCGCACCGCAGCTAGAGAGTAGCCCCCGCTCGC

CGCAACTAGAGAAAGCCCNCGCGCAGCAACGAAGACCCAGCACAGCCAAAAATAAATAAATAAATAAA------------

----------------------------------------------------------

>Tursiops_truncatus

CCTTCAGTTGACACT---------CAGGATGTCACTGGCCTTCTTC---AAAAATAGGACAG---GGGGCTTCCGTGGTG

GCGCAGTGGTTGAGAATCCGCCTGCCAGTGCAGGGGACACAGGTTCGAGCCCTGGTCTGGGAAGATCCCACATGCTGCGG

AGCAACTGGGCCCGTGAGCCACAACTCCTGAGCCTGCGCGT--------------------------------------C

TGGAGCCTGTGCTCCGCAACAAGAGAGGCCGCGATAGTGAGAGGCCCACGCACCGCGA-TGAAGAGTGGCCCCCACTCGC

TGAAACTAGAGAAAGCTCTCGCACAGAAACTAAGACCCAACGCAGCCAAAAATAAAAAAAATAATAAAA---AAAAATAC

GAAGG---GGACGAACTCAGCACTATCTGATCTGGAAGTTTCCCTTAAGCCCCACAGT

>Mesoplodon_bidens

CCT-CAGTTGACGCT---------CAGGATGTCACTGGCCTCCTTC---AAAAATAGGAAAG---GGGGCTTCCCTGGTG

GCGCAGTGGTTGAGAATCTGCCTGCCAGTGCAGGGGACACGGGTTCGAGCCCTGGTCTGGGAAGATCCCACATGCTGCGG

AGCAACTGGGCCCGTGAGCCACAACTACTGAGCCTGCACGT--------------------------------------C

TGGAGCCTGTGCTCCGCAACAAGAGAGGCTGCGTTACTGAGAGGCCCACGCACTGTGA-TGAAGAGTGGCGCCCGCTTGC

CGCAACTAGAGAAAGCCCTCGCACAGAAACGAAGACCCAACACAGCCA--------AAAATTAAAAAAA---AAAAATAC

GAAGG---GGACGAACTCAGCACTATCTGTTCTGGAAGTTTCCCTTAAGCCCCACAGT

>Physeter_catodon

CCTTCAGTTGACACT---------CAGGATGTCACTGGCCTCCTTC---AAAAATACGAAAA---GGGGCTTCCCTGGTG

GCTCAGTGGTTGAGAATCCGCCTGCCAATGCAGGG--------TTCGAGCCCTGGTCTGGGAAGATCCCACATGCCGAGG

AGCAACTGGGCCCGTGAGCCACAGCTACTGAGCCTGCAGGT--------------------------------------C

CGGAGCCTGTGCTCCGCAACAAGAGAGACCGCGTTACTGAGAGGCCCGCGCACCGCGA-TGAAGAGTGGCCCC-------

---AACTAGAGAAAGCCCTCGCACAGAAACGAAGACCCAACACAGCCCCCCCCGCCAAAAAAGAGAACA---AAAAA-AA

GAAGG---GGACTAACTCAGCACTATCTGATCTGGAAGTTTCCCTTCAGCCCCACAGT

>Kogia_breviceps

CCTTCAGTTGACACT---------CAGGATGTCACTGGCCTCCTTC---AAAAATGTGAAAG---GGGTCTTCCCTAGTG

GCGCAGTGGTTGAGAATCCTCCTGCCAGTGCAGGG--------TTCGAGCCCTGGTCTGGGAAGATCCCACATGCCGTGG

AGCAACTGGGCCCGTGAGCCACAGCTCCTGAGCCTGCGTGT--------------------------------------C

CGGAGCCTGTGCTCCTCAACAAGAAAGACCGCGTTATTGAGAGGCCTGCGCACTGCGA-TGAAGAGTGGCCCCCGCTTGT

CCCAACTAGAGAAAGCCCTCGCACAGAAATGAAGACCCAACACAGACAAAAAAAAAACCCAG----------AAAAAT--

GAAGG---GGACTAACTCAGCACTATCTGATCTGGAAGTTTCCCTTCAGCCCCACAGT

>Balaenoptera_acutorostrata

CCTTCAGTTGACACT---------CAGGATGTCACTGGCCTCCTTC---AAAAATATGAAAG------------------

--------------------------------------------------------------------------------

--------------------------------------------------------------------------------

--------------------------------------------------------------------------------

--------------------------------------------------------------------------------

--------GGACGAACTCAGCACTATCTGATCTGGAAGTTTCCCTTCAGCCCCACAGT

>Eschrichtius_robustus

CCTTCAGTTGACACT---------CAGGATGTCACTGGCCTCCTTC---AAAAATACGAAAG------------------

--------------------------------------------------------------------------------

--------------------------------------------------------------------------------

--------------------------------------------------------------------------------

--------------------------------------------------------------------------------

--------GGACAAACTCAGCACTATCTGATCTGGAAGTTTCCCTTCAGTCCCGCAGT

>Hippopotamus_amphibius

CCTTCAGTTGACACTATAGAAGGCCTGGATGTCACTGGCCTCCTTT---GAAAATACAAAAG------------------

--------------------------------------------------------------------------------

--------------------------------------------------------------------------------

--------------------------------------------------------------------------------

--------------------------------------------------------------------------------

--------GGTTGAATTCAGCACTATCTGATCTGAAAGTTACCCTTCAGCTCTACAGT

**Marker TP59**

>CHR-2

---------------------------------------------------------GGGCTTCCCTGGTGGCGCAGTGG

TTAAGAATCTGCCTGCCAATGCAGGGGACACGGGTTCGAGCCCTGGTCCGGGAAGATCCCACATGCCGCGGAGCAACTAA

GCCCNTGCGCCACAACTACTGAGCCTGCGCTCTAGAGCCCGCGAGCCACAACTACTGAGCCCGCGTGCCACAACTACTGA

AGCCCACGTGCCTAGAGCCTGTGCTCCGCAACAAGAGAAGCCACCGCAATGAGAAGCCCGNGCACCGCAACGAAGAGTAG

CCCCCNCTTGCCGCAACTAGAGAAAGCCCGCGCNCAGCAACGAAGACCCAACGCAGCC----------------------

-----------------------------------------------------------------------------

>Tursiops_truncatus

CAGCACATTATTCAATAACAGATTATCGGTTTATT---AAAAAAA-GGGAGAGT---GGGCTTCCCTGGTGGCGCAGTGG

TTAAGAATCCGCCTGCCAATGCAGGGGACACGGGTTCGAGCCCTGGTCCGGGAAGATGCCACATGCCGCAGAGCCACTAA

GCCCGTGCGCCACAACTACTAAGCCTGCGCTCTAGAGCCCGTGAGCCACAACTACTGAGTCCACGTGCCACAACTACTGA

AGCCCGTGTGCCTAGAGCCCGTGCTCTGCAACAAGAGAAGCCACCGCAATGAGAAGCCTGCACACCACAGTGAAGAGTAG

CCCCCTATTCCCACAACTAGAGAAGGCCTGTGCACAGCAACGAAGACCCAGTGCAGCCAAAAATTAATAAATAAATATT-

----AAAA---AA-AAAAGGGAGT---GAACGGAAGAACTCACTCCCTCACCGGAAGAGTCTTCAAAATTGAGTTGT

>Mesoplodon_bidens

TGGCACATTATTCAATAATAGATTATCGGTTTATT---AAAAAAA-GGGAGAGT---GGGCTTCCCTGGTGGCGCAGAGG

TTAAGAATCCGCCTGCCAATGCAGGGGACACGGGTTCGAGCCCTGGTCCGGGAAGATCCCACATGCCGTGGAGCCAATAA

GCCCGTGCGCCACAACTACTGAGTCTGCACTCTAGATCCCGCGAGCCACAACTACTGAGTCCATGTGTCACAACTACTGA

AGCCCGCGTGCCTAGAGCCCGTGCTCCGCAACAAGAGAAGCCACCGCAATGAGAAGCCCGCACACCACAGTGAAGAGTAG

CCCCCTATTCCCACAACTAGAGAAAGCCTGTGAGCAGCAACGAAGACCCAGTGCAGCCAAAAATAAATAAATATTTTTT-

------TA---AA-AAAAGGGAGT---GAACGGAAGAACTCAATCCCTCACCGGAGGAGTCTTCAAAATTGAGTTGT

>Physeter_catodon

CGGCACATTATTCAATAATAGATTATCAGTTTATT---AAAAAAAAAGGAGAAT---GGGCTTCCCTGGTAGTGCAGTGG

TTAAGAATCCGCCTGCCAATGCAGGGGACACGGGTTCGAGCCCTGGTCTGGTTAGATCCCACATACCGTGGAGCAACTAA

GCCCGTGCGCCGCAACTACTAAGCCTGTGCTCTAGAGCCCGCGAGCCATAACTACTGAGTCCACGTGCCACAACTACTGA

AGCCCGCGTGCCTAGAGCCCATGCTCTGCAACAGGAGAAGCC------------------CACGCACCAGTGAAGAGTAG

CCCCCTATTCCCACAACTAGAGAAAGCCTGTGTGCAGCAACGAAGACCCAGTGCAGCC-AAAATAAATAAGTAAATATTT

TTAAAAGA---AAGGGGGGGGGGT---GAACGAAAGAACTCAATCCCTCACCGGAGGAGTCTTCAAAATTGAGTTGT

>Kogia_breviceps

CGGCACATTATTCAATAATAGATTATCGGTTTATT---AAAAAAA-GGGAGAAT---GGGCTTCCCTGGTGGTGCAGTGG

TTAAGAATCCACCTGCCAACATAGGGGACACAGGTTCGAGCCTTGGTCTGGTTAGATCCCACATACCGTGAAGCAACTAA

GCCCGTGTGCCACAAGGACTGAGCCCGCGCTCTAGAGCCCG---------------------------------------

---------------------TGCTCTGCAACAAGAAAAGTCACCACAATGAGAAGCCCGCGCACCACAGTGAAGAGTAG

CCCCCTATTCCCACAACTAGAGAACGCCTGTGTGCAGCAACGAAGACCCAGTGCAGCCAAAAATAAATAAATAAATATTT

-----AAA---AAGGGGGGGTGGT---GAACGGAAGAACTCAATCCCTCACTGGAGGAGTCTTCAAAATTGAGTTGT

>Balaenoptera_acutorostrata

CAGCACATCATTCGATAACAGATTATCGGTTTATA---AAAAAA--GGGA--GT--------------------------

--------------------------------------------------------------------------------

--------------------------------------------------------------------------------

--------------------------------------------------------------------------------

--------------------------------------------------------------------------------

---------------------------GAATGGAAGAACTCAATCCCTCACCGGAGGAGTCTTCAAAATTGAGTTGT

>Eschrichtius_robustus

CGGCACATCATTCGATAATAGATTATCGGTTTATA---AAAAAA--GGGA--GT--------------------------

--------------------------------------------------------------------------------

--------------------------------------------------------------------------------

--------------------------------------------------------------------------------

--------------------------------------------------------------------------------

---------------------------GAATGGAAGAACTCAATCCCTCACCGGAGGAGTCTTCAAAATTGAGTTGT

>Hippopotamus_amphibius

AGGCACGTTATTACATAATAGATCATCGGTTTATT---AAAAAA--GGGA--GT--------------------------

--------------------------------------------------------------------------------

--------------------------------------------------------------------------------

--------------------------------------------------------------------------------

--------------------------------------------------------------------------------

---------------------------GAGTGGA-GAACTCA-TCCCTCACCAGAGGAGTCTTCAAAACTGAGTTGT

>Bos_taurus

AGGTACATTATTAGATAATAGATCACTGGTTTATT---AAAAAA--GGGA--GT--------------------------

--------------------------------------------------------------------------------

--------------------------------------------------------------------------------

--------------------------------------------------------------------------------

--------------------------------------------------------------------------------

---------------------------GAGTGGAGGAACTCAATCTCTCACTGGAAGAGTCTTCAAATTTAAGCTGT

**Marker TP64**

>CHR-2

---------------------------------------------------------GGGCTTCCCTGGTGGCGCAGTGG

TTAAGAATCTGCCTGCCAATGCAGGGGACACGGGTTCGAGCCCTGGTCCGGGAAGATCCCACATGCCGCGGAGCAACTAA

GCCCNTGCGCCACAACTACTGAGCCTGCGCTCTAGAGCCCGCGA----------------------GCCACAACTACTGA

GCCCGCGTGCCACAACTACTGAAGCCCACGTGCCTAGAGCCTGTGCTCCGCAACAAGAGAAGCCACCGCAATGAGAAGCC

CGNGCACCGCAACGAAG----AGTAGCCCCCNCTTGCCGCAACTAGAGAAAGCCCGCGCNCAGCAACGAAGACCCAACGC

AGCC----------------------------------------------------------------------------

--------------------------------------------------------------------------------

--------------------------------------------------------------------------------

--------------------------------------------------------------------------------

------------------------------

>Tursiops_truncatus

AGTCCTAACACCCTGCTGTGGCCAGTTTGGGCTAATCT---AAAAATCAAGGT---GGGGCTTCCTTGGTGGCGCAGTGG

TTAAGAATCCTCCTGCCAATGCAGGGGACACAGGTTCGAGCCCTGGTCCAGGAGGATCCCACATGCCGCAGAGCAGCTAA

GCCCGTGCACCACAACTACTGAGCCTGCGCTCTAGAGCCTGTGAGCCACAACTACTGAGCCCACGTGCCACAACTACTGA

GCCCACGTGCCACAACTACTGAAGCCCGCGCACCTAGAGCCGGTGCTCCGCAACAAGAGAAGCCACTGCAGTGAGAAGCC

CACGCTCCGCAATGAAG----AGTAGCCCCCGCTCGCCGCAACTAGAGAAAGCCCGTGCGCAACAACGAAGACCCAGTGC

AGCCAAAAATAAATAA----------------------------------------------------------------

--------------------------------------------------------------------------------

--------------------------------------------------------------------------------

--------------------AATAAATTTTTTAATAAAT---AAAAATC--AGGGT---GGTGGAGGGGAGTGCCTTCGC

CAGCCATC-TTTTCTCATCTGCTGGTGTTT

>Mesoplodon_bidens

AGTCTTCATACCCTGCTGTGGCCAGTTTGGGCTAATCT---AAAAATCAGGGT---GGGGCTTCCTTGGTGGTGCAGTGG

TTAAGAATCCGCCTGCCAATGCAGGGGACACGGGTTCGAGCCCTGGTCCAGGAAGATCCCGCATGCCGCGGAGCAGCTAA

GCCCGTGCGCCACAACTACTGAGCCTGCACTCTAGAGCCTGCGA----------------------GCCACAACTACTGA

GCCCGTGTGCCACAACTACTGAAGCCTGCGCGCCTAGAGCCGGTGCTCCGCAACAAGAGAAGCCACTGCAGTGAGAAGCC

TGCGCACCGCAACGAAG----AGTAGCCCCCGCTCGCCACAACTAGAGAAAGCCCATGCGCAGCATCAAAGACCCAGTGC

AGCCAAAAATAAATTAATTAAATTTATATACATATATATTTTATTTATTTATTTATTTATTTTTTGCGGTACACAGGCCT

CTCACCACTGTGGCCTCTCCCGCTGCAGAGCACAGGCTCCGGACGCGCAGGCTCAGCGGCCATGGCTCACGGGCCCAGCT

GCTCCACGGTATGTGGGATCCTCCCGGACCGGGGCACGAACCCGTGTGCCCTGCATCGGCAGGCGGACTCTCAACCACTG

CGCCACCAGGGAAGCCCAATAATAAATCTTTAAAAAAAT---AAAAATC--AAGGT---GGTGGAGGGGAGTGCCTTCAC

CAGCCATC-TTTTCTCATCTGCTGGTGTTT

>Physeter_catodon

AGCCCTCACAGCCTGCTGTGGCCAGTTTGGGCTAATCT---AAAAATCAAGGT---GGGGCTTCCTTGGTGGCGCAGTGG

TTAAGAATCCGCCTGCCAATGCAGGGGACACGGGTTCGAGCCCTGGTCTGGGAAGATCCCACACGCTGCAGAGCAACTAA

GCCCGTGCACCACAACTATTGAGCCTGCGCTCTAGAGCCCGCGA----------------------GCCACAACTACTGA

GCCCACGTGCCACAACTACTGAAGCCCGCGCACCTAGAGCCAGTGCTCTTCAACAAGAGAAGCCACTGCAGTGAGAAGCC

CCTGCACCGCAACGAAGAGTAAGTAGCCCCCGCTTGCCACAACTAGAGAAAGCCCATGCGCAGCAACAAAGACCCAGTGC

GGCCAAAAATAAATAA-----ATTTATAAATA------------------------------------------------

--------------------------------------------------------------------------------

--------------------------------------------------------------------------------

-----------------AATAATAAATTTTAAAATAATT---AAAAATAAAAAGGT---GGTGGAGGGGAGCACCTTCAC

CAGCCATC-TTTTCTCATCTGCTGGTGTTT

>Kogia_breviceps

AGTCCTCACAGCCTGCTGTGGCCAGTTTGGGCTAATCT---GAAAATCAAGAT---GGGGCTTCCTTGGTGGCGCAGTGG

TTACGAATCCACCTGCCAATGCAGGGGACATGGGTTCAAGCCCTGGTCTGGGAAGATCCCACATGCCGCAGAGCAACTAA

GCCCGTGCGCCACAACTACTGAGCCTGAGCTCTAGAGCCCGCGA----------------------GCCACAACTCCTGA

GCCCATGTGCCACAACTACTGAAGCCCACGCACCTAGAGCCAGTGCTCTGCAACAAGAGAACCCACTGTAGTGAGAAGCC

CGCGCACCGCAACGAAAAGTAAGTAGCCCCTGCTTGCCGCAACTAGAGAAAGCCCATGCGCAGCAACAAAGACCCAGTGC

AGCCAAAAATAAATAA-----ATTTATAAATA------------------------------------------------

--------------------------------------------------------------------------------

--------------------------------------------------------------------------------

-----------------AATAATAAATTTTAAAAT-------AAAAATC--AAGGT---GGTGGAGGGGAGCGCCTTTGC

CAGATAGC-TTTTCTTATCTGCTGGTGTTT

>Balaenoptera_acutorostrata

AGTCCTCACACCCTGCTGTGGCCAGTTTGGGCTAATCT---AAAAATCAAGGT---------------------------

--------------------------------------------------------------------------------

--------------------------------------------------------------------------------

--------------------------------------------------------------------------------

--------------------------------------------------------------------------------

--------------------------------------------------------------------------------

--------------------------------------------------------------------------------

--------------------------------------------------------------------------------

-----------------------------------------------------------GGTGGAGGGGAGTGCCTTCAC

CAGCCATC-TTTTCTCATCTGCTGGTGTTT

>Eschrichtius_robustus

AGTCCTCACACCCTGCTGTGGCCAGTTTGGGCTAATCT---AAAAATCAAGGT---------------------------

--------------------------------------------------------------------------------

--------------------------------------------------------------------------------

--------------------------------------------------------------------------------

--------------------------------------------------------------------------------

--------------------------------------------------------------------------------

--------------------------------------------------------------------------------

--------------------------------------------------------------------------------

-----------------------------------------------------------GGTGGAGGGGAGTGCCTTCGC

CAGCCATC-TTTTCTCATCTGCTGGTGTTT

>Hippopotamus_amphibius

AGCCCTCACACTCTGCAGTGGCCAGTTCGGGCTAATCT---AAAAACCAAGGT---------------------------

--------------------------------------------------------------------------------

--------------------------------------------------------------------------------

--------------------------------------------------------------------------------

--------------------------------------------------------------------------------

--------------------------------------------------------------------------------

--------------------------------------------------------------------------------

--------------------------------------------------------------------------------

-----------------------------------------------------------GGTGGAGGGGAG---CTTCGC

CAGTCATCTTTTTTTCATCTGCTGGTGTTC

**Marker TP65**

>CHR2B_Ttr

----------------------------------------------------------GGGCTTCCCTGGTGGCGCAGTG

GTTGAGAATCTGCCTGCCAATGCAGGGGACACGGGTTCGAGCCCTGGTCTGGGAAGATCCCACATGCCGCGGAGCAACTA

GGCCCGTGAGCCACAACTACTGAGCCTGCGCGTCTGGAGCCTGTGCTCCGCAACAAGAGAGGCCGCGATAGTGAGAGGCC

CGCGCACCGCGATGAAGAGTGGCCCCCGCTTGCCACAACTAGAGAAAGCCCTCGCACAGAAACGAAGACCCAACACAGCC

AAAAATAAATAAATAAATAAATTTAAAAAAA-------------------------------------------------

------------------------------------------------------

>Tursiops_truncatus

GCACTCACTAGAT-ACTGGTCTATAGAATGAATGGATG---GCTTAATTAAA-GA---GGGCTTCCCTGGTGGCGCAGTG

GTTAGGAATCCGCCTGCCAGTGCAGGCGACATGAGTTCGAGCCCTGGGCTGGGAAGATCCCACATGCCGTGGAGCAACTG

AGCCCGTGCGTCACAACTACTGAGCCCACG-ATCTAGAGCCCGTGCTCTGCAACAAGAGAAGTCACTGCAATGAGAAGCC

CTCATGCAGCAA--------------------------------------------------CAAAGACCCAACGCAACC

AAAAATAAAAAA-TAAATCAATCAAATAAATTTAT------------AAAT---AATAATTAAAGA---ACGC-------

--------CTGTGGGATGGGCAGTTTCCTGTAAATCTGCAGGGCCTGAGCTGGT

>Mesoplodon_bidens

GCGCTCACTAGAT-ACTGGTCTATAGAATGAATGGATG---GATTAATTAAA-GA---GGGCTTCCCTGGTGGCGCAGTG

GTTAGGAATCCTCGTGCCAATGCAGGCGACATGAGTTCGAGCCCTGGGCTGGGAAGATCCCACATGCCACGGAGCAACTG

AGCCTGTGCGTCACAATCACTGAGCCCGCG-ATCTAGAGCCCTTGCTCTGCAACAAGAGAAGCCACCACAATGAGAAGGC

TGCATGCAGCAA--------------------------------------------------CGAAGACCCAGTGCAACC

AAAAATAAAAAA-TAAATCAATCAAATAAATGTATTAAAAATAATAATAAT---AATAATTAAAGA---ACGCGT-GAGG

CTTTATGCCTGTGGGATGGGCAGTTTCCTGTAAATCTGCAGGGCCTGAGCTGGT

>Physeter_catodon

GCACTCACTAGAT-ACTGGTCTATAGAATGAATGGATG---GATTAATTAAA-GA---GGGCTTCCCTGGTGGCGCAGTG

GTTAGGAATCCGCCTGCCAATGCAGGCGACGTGAGTTCGAGCCCTGGGCCGGGAAGATCCCACATGCCGCGGAGCAACTG

AGCCCGTGCGCCACAACCACTGAGCCCGCG-ATCTAGAGCCTGTGCTCAGCAACAAGAGAAGCCACCCCAATGAGAAGCC

CGCATGCAGCAA--------------------------------------------------CAAAGACCCAACGCAACC

AAAAAAAAAAAAAAAAATCAATCAAATAAATTTATTTTAAA--AATATAAT---AATAATTAAAGA---ACACGT-GAGG

CTTTACACCTGTGGGATGGGCAGTTTCCTGTATATCTGCAGGGCCTGAGCTGGT

>Kogia_breviceps

GCCCTCACTAGAT-ACTGGTCTATAGAATGAATGGATG---GATTAATTAAA-GA---GGGCTTCCCTGGTGGCGCAGTG

GTTAGGAATCCACCTGCCAGTGCAGGCGACATGAGTTCGAGCCCTGGGCCGGGAAGATCCCACATGCCGCGGAGCAACTG

AGCCCGTGCGCCACAACTACTGAGCCCGCG-ATCTAGAGCCCATGCTCTGCAACAAGAGAAGCCACCGCAATGAGAAGCC

CGCATGCAGCAA--------------------------------------------------CAAAGACCCAACGCAACC

AAAAAAAAAAAAAAAAA--AATCAAATTAATTTATTT-------AAAAAAT---AATAATTAAAGA---ACGCGT-GAGG

CTTTACACCTGTGGGATGGGCAGTTTCCTATATATCTGCAGGGCCTGAGCTGGT

>Balaenoptera_acutorostrata

GCACTCACTAGAT-CCTGGTCTATAGAATGAGTGGATT---AATTAATCAAA-GA-------------------------

--------------------------------------------------------------------------------

--------------------------------------------------------------------------------

--------------------------------------------------------------------------------

---------------------------------------------------------------------ACGCGT-GAGG

CTTTGCGCCTGTGGGATGGGCAGTTTCCTGTAAATCTGCAGGGCCTGAGCTGGT

>Eschrichtius_robustus

GCACTCACTAGAT-CCTGGTCTATAGAATGAGTGGATT---AATTAATTAAA-GA-------------------------

--------------------------------------------------------------------------------

--------------------------------------------------------------------------------

--------------------------------------------------------------------------------

---------------------------------------------------------------------ACGCGT-GAGG

CTTTACGCCTGTGGGATGGGCAGTTTCCTGTAAATCTGCAGGGCCTGAGCTGGT

>Hippopotamus_amphibius

GCACTCACTAGAT-ACTGGTCTATAGAATGAATGGGTT---GATTAACTAAA-GA-------------------------

--------------------------------------------------------------------------------

--------------------------------------------------------------------------------

--------------------------------------------------------------------------------

---------------------------------------------------------------------ATGC-AGGAAG

CTTTATGCCTGTGGGATGGGCAGTTTCCTGTAAATGTGCAGGGTCTGAGCTGGT

>Bos_taurus

GCTCTCACTAGATCACTGGTCTATAGAACGAATGGGTT---AATTAGTTAAAAGA-------------------------

--------------------------------------------------------------------------------

--------------------------------------------------------------------------------

--------------------------------------------------------------------------------

---------------------------------------------------------------------GTGCCACGAAG

CTGTAAGCTTGTAGGACGGCCAGTTGCCTGTACATCTGCAGGGCCTGAGCTGGA

**Marker TP66**

>CHR-2B

--------------------------------------------------------------------------------

--------------------------------------------------------------------------------

--------------------------------------------------------------------------------

--------------------------------------------------------------------------------

--------------------------------------------------------------------------------

----------------------------------------------------------------GGGACTTCCCTGGTGG

TCCAGTGGTTAAGAATCTGCCTGCCAATGCAGGGGACACGGGTTCAATCCCTGGTCCGGGAAGATCCCACATGCCGTGGA

GCAACTAAGCCCGTGCGCCACAACTACTGAGCCTGTGCTCTAGAGCCCGCGAGCCGCAACTACTGAAGCCCGCGCGCCCT

AGAGCCCGTGCTCTGCAACAAGAGAAGCCACCGCAATGAGAAGCCCGCGCACCGCAGCTAGAGAGTAGCCCCCGCTCGCC

GCAACTAGAGAAAGCCCNCGCGCAGCAACGAAGACCCAGCACAGCCAAAAATAAATAA---ATAAATAAA----------

---------------------------------------------------------------------------

>Tursiops_truncatus

CGTTTCAAATCTT-------------------------------------------------------------------

--------------------------------------------------------------------------------

------------------------------------------------------------AACGGAC-------------

--------------------------------------------------------------------------------

--------------------------------------------------------------------------------

----------------------------ACAGAGCTGACCT---ACGCGAATCCACACAAT----GGACTTCCCTGGTGG

CGCAGTGGTTGAGAATCTGCCTGCTAATGCAGGGGACACGGGTTTGAGTCCTGGTCCGGGAAGATCCCACATGCCGCGGA

GCAACTGGGCCCGTGAGCCACAAC------------------------------------TACTG-AGCCTCCGCG-TCT

GGAGCCTGTGCTCCGCAACAAGAGAGGCCGCGACAGTGAAAGGCCCGC---------------------------TCACT

GCAACTAGAGAAAGCCCTCACACAGAAACGAAGACCCAACACAGCCAAAAATAAATAA---ATAAATATTTTTTTTAGA-

-----AAAAGAATCCACACAAT---GAGAGCATGATTAGCGTTCCAGTATCAGAAATTGCAGCAATAAAGGCATC

>Mesoplodon_bidens

TGTTTCAAATCTT-------------------------------------------------------------------

--------------------------------------------------------------------------------

------------------------------------------------------------AACGGGGGCTTCCCTGGTGG

CACAGTGGTTCAGAGTCTGCCTGCCGATGCAGGTTCGTGCCCCGGTCCGGGAAGATCTCACATGCCGCGGAGCAACTAGG

CCCGTGAGCCACAACTACTGAGCCTTTGTGTCTGGAGCCTGTGCTCCGCAACGGTAGAGGCCACAACAGTGAGAGGCCCG

CGTACTGCAAAAAAAAAAATCTTAACGGACAGAGCTGACCT---ACGAGAATCCACACAGT----GGACTTCCCGGGTGG

CGCAGTGGTTGAGAATCTGCCTGCCAATGCAGGGGACACGGGTTCGAGTCCTGGTCTGGGAAGATCCCACATGCCATGGA

GCAACTAGGCCCGTGAGCCACAAC------------------------------------TACTG-AGCCTGCGCG-TCT

GGAGCCCGTGCTCCGCAACAAGAGAGGCCGCGACAGTGAAAGGCCTGCGCGCCGC-GATGAAGAGTGGCCCCCACTTGCC

GCAACTGGAGAAAGCCCTCACACAGAAACGAAGACCCAACACAGCCAAATATAAATAA---ATAAATTAATTAATTAAAA

AA---AAAAGAATCCACACAAT---GAGAGCATGATTAGCATTCCAGTATCAGAAACTGCAGCAATAAAGGCATT

>Physeter_catodon

TGTTTCAAATCTT-------------------------------------------------------------------

--------------------------------------------------------------------------------

------------------------------------------------------------AACGGAC-------------

--------------------------------------------------------------------------------

--------------------------------------------------------------------------------

----------------------------ACAGAGCTGACCT---ACAAGAATCCACACAAT----GGGCTTCCCTGGTGG

TGCAGTGGTTGGGAATCTGCCTGCCAATGCAAGGGACACGGGTTCGAGCTCTGGTCTGGGAGGATCCCACATGCCGCGGA

GCAACTAAGCCCGTGCGCCACAAC------------------------------------TACTG-AGCCTGCGCG-TCT

GGAGCCTGTGCTCCGCAACAAGA--GGCCGCGACAGTGAAAGGCCCGCGCACCGC-GATGAAGAGTGGCCCCCGCTCGCC

GCAACTAGAGAAAGCCCTCGCACAAAAACGAAGACCCAACACGGCCAAAAATAAATAAATTATAAATAAATTAAAAAAAA

A----AAAAGAATCCACACAAT---GAGAGCATGATTAGCGTTCCAGTATCAGAAATTGCAGCAATAAAGGCATT

>Kogia_breviceps

TGTTTCAAATCTT-------------------------------------------------------------------

--------------------------------------------------------------------------------

------------------------------------------------------------CACGGAC-------------

--------------------------------------------------------------------------------

--------------------------------------------------------------------------------

----------------------------ACAGAGCTGACCT---ACAAGAATCCACACAAT----GGGCTTCCCTGGTGG

TGCAGTGGTTGGGAATCTGCCTGCCAATTCAGGGGACACGGGTTCGAGCCCTGGTCTGGGAGGATCCCACATGCCGCGGA

GCAACTAAGCCCATGCGCCACAAC------------------------------------TACTG-AGCCTGCGCG-TCT

GGAGCCTGTGCTCCGCAACGAGAGAGGCCGCGACAGTGAGAGGCCCGCGCACCGC-GATGAAGAGTGGCCCCCGCTCGCC

GCAACTGGAGAAAGCCCTCGCACAGAAACGAAGACCCAACACAGCCAAAAATAAATAAATTATAAATAAATTTTTT----

-----AAA--AATCCACACAAT---GAGAGCATGATTAGTGTTCCAGTATCAGAAATTGCAACAATAAAGGCATT

>Balaenoptera_acutorostrata

TGTTTCAAATCTT-------------------------------------------------------------------

--------------------------------------------------------------------------------

------------------------------------------------------------AACGGAC-------------

--------------------------------------------------------------------------------

--------------------------------------------------------------------------------

----------------------------ACAGAGCTGACCT---ACAAGAATCCACACAAT-------------------

--------------------------------------------------------------------------------

--------------------------------------------------------------------------------

--------------------------------------------------------------------------------

--------------------------------------------------------------------------------

-------------------------GAGAGCATGATTAGCGTTCCAGTATCAGAAATTGCAGCAATAAAGGCACT

>Eschrichtius_robustus

TGTTTCAAATCTT-------------------------------------------------------------------

--------------------------------------------------------------------------------

------------------------------------------------------------AACGGAC-------------

--------------------------------------------------------------------------------

--------------------------------------------------------------------------------

----------------------------ACAGAGCTGACCT---ACAAGAATCCACACAAT-------------------

--------------------------------------------------------------------------------

--------------------------------------------------------------------------------

--------------------------------------------------------------------------------

--------------------------------------------------------------------------------

-------------------------GAGAGCATGATTAGCGTTCCAGTATCAGAAATTGCAGCAATAAAGGCACT

>Hippopotamus_amphibius

TGTTTCAAATCTT-------------------------------------------------------------------

--------------------------------------------------------------------------------

------------------------------------------------------------AACAGAC-------------

--------------------------------------------------------------------------------

--------------------------------------------------------------------------------

----------------------------ACAGAGCTGACCT---ACAAGAATCCACACAAT-------------------

--------------------------------------------------------------------------------

--------------------------------------------------------------------------------

--------------------------------------------------------------------------------

--------------------------------------------------------------------------------

-------------------------GACAGCATGACTGATGTTCCAGTGTCAGAAACTGCAGCAATAAAGGCATT

>Bos_taurus

TGTATCAAATCTTTTTTTCTTTTTTAAAGATATTTTGAATGTGGACCATTTTTAAAGTCTTTATTGAATTTTTTGCAATA

TTGTTGCTGTTTTATGTTTTGGTTTTCTGGCCATAACGCATGTGAGACCTTAGCTCTCCAACCAGAGATCAAACCTGAAT

CCCCTGCATCAGAAGGTAAAGTCTTAAACACTGGACCACCAGGGAAGTCCCTCAAATTTTAATGGAC-------------

--------------------------------------------------------------------------------

--------------------------------------------------------------------------------

----------------------------ACAGAGCTGACCT---ACAAGAAGCTACACAAA-------------------

--------------------------------------------------------------------------------

--------------------------------------------------------------------------------

--------------------------------------------------------------------------------

--------------------------------------------------------------------------------

-------------------------GAGAGCATGACTAGCACTCCAGTATCAGAAACTGCAGCAAGAAAGGCATT

**Marker TP67**

>CHR-2

--------------------------------------------------------GGGCTTCCCTGGTGGCGCAGTGGT

TAAGAATCTGCCTGCCAATGCAGGGGACACGGGTTCGAGCCCTGGTCCGGGAAGATCCCACATGCCGCGGAGCAACTAAG

CCCNTGCGCCACAACTACTGAGCCTGCGCTCTAGAGCCCGCGAGCCACAACTACTGAGCCCGCGTGCCACAACTACTGAA

GCCCACGTGCCTAGAGCCTGTGCTCCGCAACAAGAGAAGCCACCGCAATGAGAAGCCCGNGCACCGCAACGAAGAGTAGC

CCCCNCTTGCCGCAACTAGAGAAAGCCCGCGCNCAGCAACGAAGACCCAACGCAGCC-----------------------

-------------------------------------------------------------------------

>Tursiops_truncatus

TGAGCACACGGGTCAGGCAGGGAAAAGTGAGGAGTAC---AAAACGCATTCTT---GGACTTCCCTGGTGGTGCCGTGGT

TAAGAATCCGCCTGCCAATGCGGGGGACACGGGTTCCAGCCCTGGTCTGGGAAGATCCCACGTGTCGCAGTGCAACTAAG

CCCGTGCGCCACAGCTACTGAGCCTGCGCTCTAGAGCCCGCGAGCCACAACTACTGAGCCCGTGTGCCACAACCACTGAA

GCCTGTGCGCCTAGAGGCCGTGCTCTGCAGCAAGAGAAGCCACCACAATGAGAAGCCC----------------------

----GCGTACCACAACTAGAGAAAGCCCGCGCGCAGCAACAAAAACCCAACCTAACCAAAAATAAATAAATAAATAAAAC

AAAA---AAAACGCATTCTC---AGGGCTGGATCTCTGGTCCATGGGCAAGACTGTGCTGCCCTAGGGAGGTC

>Mesoplodon_bidens

TGAGCACACGGGTCAGGCAGGGAAAAGTGAGGAATAC---AAAATGCATTCTC---GGACTTCCCTGGTGGTGCAGTGGT

TAAGAATCCGCCTGCCAATGCAGGGGACACGGGTTCGAGCCCTGGTCTGGGAAGATCCCACATGCCGCGGAGCAACTAAG

CCCGTGCGCCACAGCTACTGAGCCTGCGCTCTAGAGCCCGCGAGCCACAACTACTGAGCCCGTGTGCCACAACCACTGGA

GCCCGTGCGCCTAGAGGCCGTGCTCTGCAGCAAGAGAAGCCATTGCAATGAGAAGCCC----------------------

----ATGTACTGCAACTAGAGAAAGCCTGCGCGCAGCAACAAAAACCCAACCTAACCAAAACTAAATAAAACAAACAAAC

AAAA---AACCCACATTCTC---AGGGCTGGATCTCTGGTCCATGGACAAGACTGTGCTGCCCTCGGGAGGTC

>Physeter_catodon

TGAGCACACGGGGCAGGCAGGGAAAAGTGAGGAATAC---AAAACCCATTCTC---AGGCTTCCCTGGTGGCGCACTGGT

TAAGAATCCGCCCGCCAACGCGGGGGACACGGGTTCGAGCCCCGGTCCGGGAAGATCCCACATGCTGCGGAGCAACTAAG

CCCGTGCGCCACAACTACTGAGCCTGTGCTCTAGAGCCCGAGAGCCACAACTACTGAGCCCGTGTGCCACAACCACTGAA

GCCCGTGCACCTAGAGGCTGTGCTCTGCAGCAAGAGAAGCCACCGCAATGAGAAGCCC----------------------

----GTGTACCGCAACTAGAGAAAGCCCGCGCGCAGCAACAAAAACCCAACCTAACCAAAAATGAATTTA-AAAAACAAC

AAA----AAAACGCATTCTC---AGGGCTGGATCTCTGGTCCATGGGCAAGACTGTGCTGCCCTAGGGAGGTC

>Kogia_breviceps

TGAGCACACGGGTCAGGCAGGGAAAAGTGAGGAATAC---AAAACTCATTCTC---AGACTTCCCTGGTGGCGCAGTGGT

TAAGAATCCGGCTGCCAATGCAGGGGACACGGGTTCGAGCCCTGGTCCGGGAAGATCCCACATGCTGCGGAGCAACTAGG

CCCTTGCGCCACAGCTACTGAACCTGCGCTCTAGAGCCCGCGAGCCACAACTACTGAGCCCGTGTGCCACAACCACTGAA

GCCCGTGCACCTAGAGGCTGTGCTCTGCAGCAAGAGAAGCCACCACAATGAGAAGCCC----------------------

----GTGTACTGCAACTAGAGAAAGCCCGCGCGCAGCAACAAAAACCCAACCTAACCAAAAATAAATTTA-AAAAACAAC

AAA----AAAACGCATTCTC---AGGGCTGGATCTCTGGTCCATGGGCAAGACTGTGCTGCCCTAGGGAGGTC

>Balaenoptera_acutorostrata

TGAGCACACGGGTCAGGCAGGGAGAAGTGAGGAACAC---AAAACGCATTCTC---------------------------

--------------------------------------------------------------------------------

--------------------------------------------------------------------------------

--------------------------------------------------------------------------------

--------------------------------------------------------------------------------

-----------------------AGGGCTGGATCTCTGGTCCCTGGGCAAGACTGTGCTGCCCTAGGGAGGTC

>Eschrichtius_robustus

TGAGCACACGGGTCAGGCAGGGAGAAGTGAGGAATAC---AAAACGCATTCTC---------------------------

--------------------------------------------------------------------------------

--------------------------------------------------------------------------------

--------------------------------------------------------------------------------

--------------------------------------------------------------------------------

-----------------------AGGGCTGGATCTCTGGTCCATGGGCAAGACTGTGCTGCCCTAGGGAGGTC

>Hippopotamus_amphibius

TGAGCACACGGGTCAAGTGGGAAAGAGTGAGGAATAC---ATAATGCATTCTC---------------------------

--------------------------------------------------------------------------------

--------------------------------------------------------------------------------

--------------------------------------------------------------------------------

--------------------------------------------------------------------------------

-----------------------AGGGCTGGATCTCTGGTCCATGGGCAAGACTGAGCTTCCCTAGGGAGGTC

>Bos_taurus

GGAGCACATGGGTCAGGTAGGAAGAC--------------AGAACACACGCTC---------------------------

--------------------------------------------------------------------------------

--------------------------------------------------------------------------------

--------------------------------------------------------------------------------

--------------------------------------------------------------------------------

-----------------------AGAGCTGGATCTCTGGTCCATGAGCAAGGCTGAATTGCCCTAGGGAGGTC

**Marker TP73**

>CHR-2B

--------------------------------------------------------GGGACTTCCCTGGTGGTCCAGTGG

TTAAGAATCTGCCTGCCAATGCAGGGGACACGGGTTCAATCCCTGGTCCGGGAAGATCCCACATGCCGTGGAGCAACTAA

GCCCGTGCGCCACAACTACTGAGCCTGTGCTCTAGAGCCCGCGAGCCGCAACTACTGAAGCCCGCGCGCCCTAGAGCCCG

TGCTCTGCAACAAGAGAAGCCACCGCAATGAGAAGCCCGCGCACCGCAGCTAGAGAGTAGCCCCCGCTCGCCGCAACTAG

AGAAAGCCCNCGCGCAGCAACGAAGACCCAGCACAGCCAAAAATAAATAAATAAATAAA---------------------

--------------------------------------------------------------

>Tursiops_truncatus

CAAGTGCAACAGAATACCTTAGTAATGAAAGGCAATT---AAGAAGTCTTCAA---GGG-CTTCCCTGGTGGCGCAGTGG

TTGAGAATCTGCCTGCCAATGCAGGGGACACGGGTTCAAGCCCTGGTCTGGGAAGATCCCACATGCCGCGGAGCAACTAG

GCCCGCGAGCCACAACTACTGAGCCTGCGCGT--------------------------------------CTGGAGCTTG

TGCTCCACAACAAGAGAGGCCGCGACAGTGAGAGCCCTGCACACCAC-GATGAAGAGTGGCCCCTGCTCGCCGCAACTAG

AGAAAGCCCTCGCACAGAAATGAAGACCCAGCACAGCCAAAAATAAATATAAATAAATAAAAATTTAAAAA-----AAGA

AGTCTTCAA---GAATACTTTCCAGTCAACATGGTATTATCTGTTCATAGTTTGATGCACCT

>Mesoplodon_bidens

CAAGTGCAACAGAATACCTTAGTAATGAAAGGCAATT---AAGAAGTCTTCAA---GGG-CTTCCCTGGTGGCGCAGTGG

TTGAGAATCTGCCTGCCAATGCAGGGGACACGGGTTCGAGCCCTGGTCTGGGAAGATCCCACATGCCACGGAGCAACTAG

GCCCGCGAGCCACAACTACTGAGGCTGCGCGT--------------------------------------CTGGAGCTTG

TGCTCCGCAACAAGAGAGGCCGCGACAGTGAGAGGCCCACGCACCGC-GATGAAGAGTGGCCCCCGCTCGCCGCAACTAG

AGAAAGCCCTAGCACAGAAACGAAGACCCAACACAGCCAAAAATAAATATAAATAAATTTAAATTTAAAAAAA---AAGA

AGTCTTCAA---GAATATTTTCCAGTCAACATGGTATTATCTGTTCATAGTTTGATGTATCT

>Physeter_catodon

CAAGTGCAACAGAATACCTTAGTAATGAAAGGCAATT---AAGAAGTCTTCAA---GGG-CTTCCCAGGTGGCGCAGTGG

TTGAGAATCTGCCTGCCAATGCAGGGGACACGGGTTCGAGCCCTGGTCTGGGAAGATCCCACATGCCGCGGGGCAACTAG

GCCCATGAGCCACAACTACTGAGCCTGAACGT--------------------------------------CTGGAGCTTA

TGCTCTGCAACAAGAGAGGCCGCGACAGTGAAAGGCCCGCGCACCAT-GATGAAGAGTGGCCCCCACTCGCCGCAACTAG

AGAAAGCCCTCACACAGAAACGAAGACCCAACACAGCCAAAAATAAATATAAATAAATAATTTTTTTAAAAA----AAGA

AGTCTTCAA---GAATATTTTCCAGTCAACATGGTATTGTCTGTTCTTAGTTTGATGTATCT

>Kogia_breviceps

CAAGTGCAACAGAATACCTTAGTAATGAAAGGCAGTT---AAGAAGTCTTCAG---GGG-CTTCCCAGGTGGCGCAGTGG

TTGAGAATCTGCCTGCCAATGCAGGG-ACATGGGTTCGAGCCCTGGTCTGGGAAGATCCCACATGCTGCGGGGCAGCTAG

GCCCGTGAGCCACAAATACTGAGCCTGAACGT--------------------------------------CTAGAGCTTA

TGCTCCGCAACAAGAGAAGCTGCGACAGTGAAAGGCCCGTGCACCAC-GATGAAGAGTGGCCCCCACTCGCCACAACTAG

AGAAAGCCCTCGCACAGAAACGAAGACCCAACACAGCCAAAAATAAATATAAATAAATAATTTTTTTAAAA-----AAGA

AGTCTTCAA---GAATATTTTCCAGTCAACATGGTATTGTCTGTTCATAGTTTGATGTATCT

>Balaenoptera_acutorostrata

CAAGTGCAACAGAATACCTTAGTAATGAAAGGCAATT---AAGAAGTCTTCAA---------------------------

--------------------------------------------------------------------------------

--------------------------------------------------------------------------------

--------------------------------------------------------------------------------

--------------------------------------------------------------------------------

------------GAATATTTTCTAGTCAACATGGTATTGTCTGTTCATAGTTTGATGTATCT

>Eschrichtius_robustus

CAAGTACAACAGAATACCTTAGTAATGAAAGGCAATT---AAGAAGTCTTCAA---------------------------

--------------------------------------------------------------------------------

--------------------------------------------------------------------------------

--------------------------------------------------------------------------------

--------------------------------------------------------------------------------

------------GAAAATTTTCCAGTCAACATGGTATTGTCTGATCATAGTTTGATGTATCT

>Hippopotamus_amphibius

CAAGTGCAACAGAATACCTTACTCATGAAAGTCAATT---AAGAAG-CTTCAA---------------------------

--------------------------------------------------------------------------------

--------------------------------------------------------------------------------

--------------------------------------------------------------------------------

--------------------------------------------------------------------------------

------------GAACATTTTCCATTCAACGTGGCATTGTGTGTTCATACTTTGATGTATCT

**Marker TP78**

>CHR2A_Ttr

--------------------------------------------------------GGGCTTCCCTGGTGGCGCAGTGGT

TGAGAGTCCGCCTGCCGATGCAGGGGACACGGGTTCGTGCCCCGGTCCGGGAAGATCCCACATGCCGCGGAGCAGCTAGG

CCCGTGAGCCATGGCCGCTGAGCCTGCGCGTCCGGAGCCTGTGCTCCGCAACGGGAGAGGCCACAACAGTGAGAGGCCCG

CGTACCGCAAAAAAAAAAAAAAAAAAA-----------------------------------------------------

------------------

>Tursiops_truncatus

GAGCCTTGTTGTCAGTTGACTGACTGGGCAGGTGTC---AAAAACACTTTATA---GGGCTTCCCTGGTGGCGCAGTGGT

TGGGAGTCCGCCTGCCGGTGCGGGGGGCGCGAGTTCGTGCCCCGGTCCGGGGGGATCCCGCGTGCCGCGGAGCGGCTGGG

CCGGTGGGCCGTGGCCGCTGGGCCTGTGCGTCCGGAGCCTGTGCTCCGCGGCGGGAGGGGCCGCGGCGGTGGGAGGCCCA

CGTACCACGAAGAAAATAAAAA---------AAAAAAACTTTATA---ACTTATATCCAAAACCGTCTGACAACAAGGTA

TTCAGTTGTGACATCAGA

>Mesoplodon_bidens

GAGCCTTGTTGTCAGTTGACTG----GGCAGGTGTC---AAAAGCACTTCATA---GGGCTTCCCTGGTGGCGCAGTGGT

TGGGAATCCGCCTGCCGGTGCGGGGGGCGCGGGTTCGTGCCCTCGTCCGGGGGGATCCCGCGTGCCGCGGAGCGGCTGGG

CCCGTGGGCCGTGGCCGCTGGGCCTGTGCGTCCCGAGCCTGTGCTCTGCGGCGGGAGGGGCCGCGGTGGTGGGAGGCCCA

AGTACCACGAGAAAGAAAA------------AAAAAAACTTTATA---AC--ATATCCAAAACCGTCTGACAACAAGGTA

TTCAGTTGTGACATCAGA

>Physeter_catodon

GAGCCTTGTTGTCAGTTGACTGACTGGGCAGGTGTC---AAAAACACTTTATA---GGGCTTCCCTGGTGGCGCAGTGGT

TGAGAGCCCGCCTGCCGATGCAGGGGACACGGGTTCGTGCCCCGGTCCGGGAAGATCCCACATGCCGCGGAGCGGCTGGG

CCCGTGAGCCATGGCCGCTGAGCCTGCGCGTTCGGAGCCTGTGCTCCGCAACGGGAGAGGTCACGGCAGTGAGAGGCCCG

CGTACCGCCAAAAAAACAAACAAA-------AAGAACACTTTATA---ATTTATATCCAAAACTGTCTGACAACAAGGTA

TTCAGTTGTGACATCAGA

>Kogia_breviceps

GAGCCTTGTTGTCAGTTGACTGACTGGGCAGGTGTC---AAAAACACTTTATA---GGGCTTCCCTGGTGGCGCAGTGGT

TGAGAGCCCGCCCACCGATGCAGGGGACGCGGGTTCGTGCCCCGGTCCGGGAAGATCCCATATGCCGCAGAGCGGCTGGG

CCCGTGAGCCACGGCCGCTGAGCCTGCGCGTCCGGAGCCTGTGCTCCGCAGCAGGAGAGGCCGCGGCAGTGAGAGCCCCG

CGTACCGCAAAACAAACAAACAAACAAA---AAGAACACTTTATA---ATTTGTATCCAAACCTGTCTGACAACAAGGTG

TTCAGCTGTGACATCAGA

>Balaenoptera_acutorostrata

GAGCCTTGTTGTCAGTTGACTGACTGGGCAGGTGTC---AAAAACACTTTATA---------------------------

--------------------------------------------------------------------------------

--------------------------------------------------------------------------------

------------------------------------------------ACTTATATCCAAAACCGTCTGACAACAAGGTA

TTCAGT-----CATCAGA

>Eschrichtius_robustus

GAGCCTTGTTGTCAGTTGACTGACTGGGCAGGTGTC---AAAAACACTTTATA---------------------------

--------------------------------------------------------------------------------

--------------------------------------------------------------------------------

------------------------------------------------ACTTATATCCAAAACCGTCTGACAACAAGGTA

TTCAGT-----CATCAGA

>Hippopotamus_amphibius

GGGCCTTGTTGCCAGCTCACTGACTGGGCGAGTGTC---AAAACTATTTTACA---------------------------

--------------------------------------------------------------------------------

--------------------------------------------------------------------------------

------------------------------------------------AATTATATCCAAAACCGTCTGACAGCAAGGTA

TGCGGTTGTGACCTCAGA

>Bos_taurus

GAGCCTTGTTGTCAGTTGACTGAGCGGG-AGGCGGC---AAACACATTTCATA---------------------------

--------------------------------------------------------------------------------

--------------------------------------------------------------------------------

------------------------------------------------AATTGTATCCCAGACAGCCTGACAACAGGGTG

TTCAGTTGTGACGTCAGA

**Marker TP79**

>CHR-2B

--------------------------------------------------------GGGACTTCCCTGGTGGTCCAGTGG

TTAAGAATCTGCCTGCCAATGCAGGGGACACGGGTTCAATCCCTGGTCCGGGAAGATCCCACATGCCGTGGAGCAACTAA

GCCCGTGCGCCACAACTACTGAGCCTGTGC-TCTAGAGCCCGCGAGCCGCAACTACTGAAGCCCGCGCGCCCTAGAGCCC

GTGCTCTGCAACAA-GAGAAGCCACC-GCAATGAGAAGCCCGCGCACCGCAGCTAGAGAGTAGCCCCCGCTCGCCGCAAC

TAGAGAAAGCCCNCGCGCAGCAACGAAGACCCAGCACAGCCAAAAATAAATAAATAAATAAA------------------

-----------------------------------------------------

>Tursiops_truncatus

GCACTGTTTAAACTTAAGTAAAATGGAGTGAAATTG---AAAATCCAGTTCCT----GGGCTTCCCTGGGGGCGCAGTGG

TTGAGAGTCCGCCTGCCAATGCAGGGGACGCGGGTTCAAGCCCTGGTCCGGGAAGATCCCACATGCCGCGGAGCAACTAG

GCTGGTGAGCCACAACTACTGAGCCTGCGCGTCTGGAGCTTGTGCTCCGCAACGAGAGAGG-------------------

-----CCGCGACAGTGAGAGGCCCGC-GCAC-----------CGCACCGC-GAAGAAGAGTAGCCCTCGCTTGCCACAAC

TAGAGAAAGTCCTCGCACAGAAACGACGACCCAACACAGCCAAAAAAAAA---------------AAAATTCAGTTCCT-

--CAGACACACCAGCCACATTTCCAATGC-TTGACAGCCGCAAGTGACCAATG

>Mesoplodon_bidens

GCACTGTTTAAACTTAAGTAAAATTGAGTGAAATTT---GAAATCCAGTTCCT----GGGCTTCCCTGGTGGCGCAGTGG

TTGAGAATCTGCCTGCCAATGCAGGGGACATGGGTTCAAGCCCTGGTCTGGGAAGATCCCATATGCCGCGGAGCAACTAG

GCCGGTGAGCCACAACTACTGAGCCTGCGCGTCTGGAGCTCGTGCTCTGCAACGAGAGAGG-------------------

-----CCGCAACAGTGAGAGGCC-GTGACAG----AGGCCCGCGCACCGC-GATGAAGAGTGGCCCTCGCTCGCCGCAAC

TAGAGAAAGCCCTCGCACAGAAACGAAGACCCAACACAGCCAAAAAAAAAAA-------------AAAACTCAGTTCCT-

--CAGACACACTAGCCACATTTCCAATGC-TTGACAGCTGCAAGTGACCAAAG

>Physeter_catodon

GCACTGTTAAAACTTAAGTAAAATTGAGTGAAATTT---AAAATCCAGTTCAT----GGGCTTCCCTGGTGGCGCAGTGG

TTGAGAATCTGCCTGCCAATGCAGGGGACGCGGGTTCGAGCCCTGGTCTGGGAAGATCCCCCATGCCGCGGGGCAACGAG

GCCGGTGAGCCACAACTACTGAGCCTGTGTGTCTGGAGCTTGTGCTCCGCAACAAGAGAGA-------------------

-----CTGCGACAGTGAGAGGCC-GCGGCAGTGAGAGGCCCGCGCACCGC-GATGAAGAGTGGCCCCCGCTCGCCACAAC

TAGAGAAAGCCCTCGCCCAGAAACGAAGACCGGACACAGCCAAAAAAAAAAAAAAA---------AAATTTCAGTTCCT-

--CAGACACACCAGCTACATTTCCAATGCTTTGACAGCCGCAAGTGGCCAGTG

>Kogia_breviceps

GCACTCTTAAAACTTAAGTAAAATTGAGTGAAATTT---AAAATCCAGTTCAT----GGGCTTCCCTGGTGGCGCAGTGG

TTGGGAATCTGCCTGCCGATGCAGGGAACACGGGTTCAAGCCCTGGTCTGGGAAGATCCCCCACGCCGCGGAGCAACCAG

GCCGGTGAGCCACAACTACTGAGCCCGTGCGTCTGGAGCTTGTGCTCCACAACAAGAGAGG-------------------

-----CTGCGACAGGGAGAAGCC-----------------TGCGCACCGC-GATGAAGAGTGGCCCCCGCTCACCGCAAC

TAGAGAAAGCCCTCGCACAGAAACGAAGACCCAACACAGCCAGGAAAAAAAACAA----------AAAATTCCGCTCCT-

--CAGACGCTCCAGCTACACTTCCAATGC-TTGACAGCCGCCAGTGGCCAATG

>Balaenoptera_acutorostrata

GCACTGTTTAAACTTAAGTAAAATTGAGTGAAATTT---AAAATTCCGTTCCT---------------------------

--------------------------------------------------------------------------------

--------------------------------------------------------------------------------

--------------------------------------------------------------------------------

--------------------------------------------------------------------------------

--CAGACACACCAACCACATTTCCAATGC-CTGACAGCCGCAAGTGGCCAACG

>Eschrichtius_robustus

GCACTGTTTAAACTGAAGTAAAATTGAGTGAAATTT---AAAATTCCGTTCCT---------------------------

--------------------------------------------------------------------------------

--------------------------------------------------------------------------------

--------------------------------------------------------------------------------

--------------------------------------------------------------------------------

--CAGACACACCAGCCACATTTCCAATGC-TTGACAGCCGCAGGTGGCCAACG

>Hippopotamus_amphibius

GCACTGTTTAAACTTAAGTAAAATTAAGTGAAATGT---AAAATTCAGTTCCT---------------------------

--------------------------------------------------------------------------------

--------------------------------------------------------------------------------

--------------------------------------------------------------------------------

--------------------------------------------------------------------------------

--CAGACACACCAACCACATCTCCAATGC-TTGACAGCCACATGTGGCCAATG

**Marker TP81**

>CHR-2

-------------------------------------------------------------GGGCTTCCCTGGTGGCGCA

GTGGTTAAGAATCTGCCTGCCAATGCAGGGGACACGGGTTCGAGCCCTGGTCCGGGAAGATCCCACATGCCGCGGAGCAA

CTAAGCCCNTGCGCCACAACTACTGAGCCTGCGCTCTAGAGCCCGCGAGCCACAACTACTGAGCCCGCGTGCCACAACTA

CTGAAGCCCACGTGCCTAGAGCCTGTGCTCCGCAACAAGAGAAGCCACCGCAATGAGAAGCCCGNGCACCGCAACGAAGA

GTAGCCCCCNCTTGCCGCAACTAGAGAAAGCCCGCGCNCAGCAACGAAGACCCAACGCAGCC------------------

--------------------------------------------------------------------------------

--------------

>Tursiops_truncatus

TTCCTGGGGAAAGGGTCCGTTGAGTTTCATCGGGTACTC---GAAAA----GATCCA---GGGGCTTCCCTGG-------

------AAGAATCTGCCTGCCAATGCAGGGAACACGG-TTCGAACCCTGGTCCGGGAAGATCCCACGTGCTGCGAAGCAA

CTAAGCAACTA----ACAACTACTGAGCCTGTGCTCTAGAGCCCGCCAGCCACAACTACTGAGCCCGCGTGCCACAACCA

CTGAAGCCCGCATGCCTAGAGCCCATGTTCTGCAACAAGAGAAGCCACTGCAATGAGAAGCCCACGCACTGCAACGAAGA

GTAGCCCCTGCTCGCTGCGACTAGAGAAAGCCCACAC---GCAGTGAAGACCCAACACAGACAAAAATAAAAAATAAATA

AA---------TTTATTTTTTAA-------AAAAAGATCCA---AGATGCGTTGAAGTTCAAGAGGCAGGGGAACAACGT

TGCAGCGTTAGCCG

>Mesoplodon_bidens

TTCCTGGGGAAAGGGTCCGTTGAGTTTCATTGGGTACTC---AAAAA----GATCCA---GGGGCTTCCCTGGTGGCACA

GTGGTTAAGAATCCGCCTGCCAGTGCAGGGAAAACGGGCTCGAGCCCTGGTCCGGGAGGATCCCACATGCTGCGAAGGAA

CTAAGCCCGTGCACCACAACTACTGAGCCTGTGCTCTAGAGCCCGCCAGCCACAACTACTGAGCCCGCGTGCCACAACCA

CTGAAGCCCTCATGCCTAGAGGCCATGTTCCGCAACAAGAGAAGCCACCGCAATGAGAAGCCCACGCACTGCAACGAAGA

GTAGCCTCTGCTCGCCGCAACTAGAGAAAGCCCACAC---GCAGTGAAGACCCAACACAGACAAAAATAAAAAATAAATA

CA---------TTTATT----AA-------AAAAAGATCCA---AGATGCGCTGAAGTTCAAGAGGCAGGGGAACAACGT

TGGAGCGTTAGCCG

>Physeter_catodon

TTCCTGGGGAAAGGGTCCGTTGAGTTTCACTGGGTACTC---AAAAA----GATCCA---GAGGCTTCCCTGGTGGCGCA

GTGGTTAAGAATCCGCCTGCCAATGCAGGGAACACGGGTTCGAGCCCTGGTCCGGGAAGATCCCACATGCTGCGAAGCAA

CTCAGCCCGTGCACCACAACTACTGAGCCTGTGCTCTAGAGCCTGCCAGCCACAAGTACTGAGCCCGCGTGCCACAACCA

CTGAAGCCCGCATGCCTAGAGCCCACGTTCCGCAACAAGAGAAGCCACCGCAATGAGAAGCCCACGCAGCGCAACGAAGA

GTAGCCCCTGCTCGCCGCAACTAGAGAAAGGCCACAC---GCAGTGAAGACCCAACACAGACAAAAATAAAAAATAAATA

AAATAAATAAATTTATTAAAAAA-------AAAAAGATCCA---AGATGCGCTTAAGTTGAAGAGGCAGGGGAACAACGT

TGGAGCGTTAGCCG

>Kogia_breviceps

TTCCTGGGGAAAGGGTCCGTTGAGTTTCACTGGGTACTC---AAAAA----GATCCA---GAGGCTTCCCTGGTGGCGCA

GTGGTTAAGAAAACGCCTGCCAAAGCAGGCAACACGGGTTCGAGCCCTGGTCCGGGAAGATCCCACATGCTGCGAAGCAA

CTCAGCCCGTGCACCACAACTACTGAGTCTGTGCTCTAGAGCCTGCCAGCCACAAGTACTGAGCCCGCGTGCCACAACCA

CTGAAGCCCGCATGCCTAGAGCCCATGTTCCGCAACAAGAGAAGCCACCGCAATGAGAAGCCCACGCACCGCAACAAAGA

GTAGCCCCTGCTCGCCGCAGCTAGAGAAAGCCCACAC---GCAGTGAAGACCCAACACAGACAAAAATAAA-------TA

AA---------TTTATTAAAAAAAAAA---AAAAAGATCCA---AGATGCGCTTAAGTTGAAGAGGCAGGGGAACAATGT

TGGAGCGTTAGCCG

>Balaenoptera_acutorostrata

TTCCTGGGGAAAGGGTCCGTTGAGTTTCATTGCGTACTC---AAAAA----GATCCA-----------------------

--------------------------------------------------------------------------------

--------------------------------------------------------------------------------

--------------------------------------------------------------------------------

--------------------------------------------------------------------------------

--------------------------------------------AGATGCGCTGAAGTTCAAGAGGCAGGGGAACAACGT

TGGAGCGTTAGCCG

>Eschrichtius_robustus

TTCCTGGGGAAAGGGTCCGTTGAGTTTCATTGCGTACTC---AAAAA----GATCCA-----------------------

--------------------------------------------------------------------------------

--------------------------------------------------------------------------------

--------------------------------------------------------------------------------

--------------------------------------------------------------------------------

--------------------------------------------AGATGCGCAGAAGTTCAAGAGGCAGGGGAACAACGT

TGGAGCGTTAGCCG

>Hippopotamus_amphibius

TTCCTGGGGAGAGGATCCGTTGAGTTTCATTGCGTACTC---AAAAAAAAAAATCCA-----------------------

--------------------------------------------------------------------------------

--------------------------------------------------------------------------------

--------------------------------------------------------------------------------

--------------------------------------------------------------------------------

--------------------------------------------AGATGCGCTAAAGTTGAAGAGGCAGGGGGACAATGT

TGGAGCGTTAGCCG

>Bos_taurus

TTCCTAGGGAGAGGATCCGTTGAGTTTCACTGGGTACTC---AAAAA----GATCCA-----------------------

--------------------------------------------------------------------------------

--------------------------------------------------------------------------------

--------------------------------------------------------------------------------

--------------------------------------------------------------------------------

--------------------------------------------AGGTGGGCCAAGGTTGAAGAGATAGAGGAACAACGT

TGGAGCATTAGCTG

**Marker PT5**

>CHR2C_Ttr

--------------------------------------------------------GGACTTCCCTGGTGGCGCAGTGGT

TAAGAATCCGCCTGCCAATGCAGGGGACACGGGTTCGAGCCCTGGTCCGGGAAGATCCCACATGCCGCGGAGCAACTAAG

CCCGTGTGCCACAACTACTGAGCCTGCGCTCTAGAGCCCGTGAGCCACAACTACTGAGCCCACGAGCCACAACTACTGA-

-----------------------------------GCCCACGTGCCACAACTACTGAAGCCCGCGCGCCTAGAGC-----

---CCGTGCTCCGCAACAAGAGAAGCCACCGCAATGAGAAGCCCGCGCACCGCAACGAAGAGTAGCCCCCGCTCGCCGCA

ACTAGAGAAAGCCCGCGCGCAGCAACGAAGACCCAACGCAGCCAAAAATAA--ATAAATAAATTAATTTTTTTTTTAAAA

AA--------------------------------------------------------------------------

>Tursiops_truncatus

CTTTGTGTTTGTTTCAATGTCCTGTTTATCAGAATT---AAAAGGTGCATGGG---GGGCTTCCCTGGTGGCGCAGTGGT

TAAGAATCTGCCTGCCAATGCAAGGGACACGGGTTCGAGCCCTGGCCCGGGAAGATCCCACATGCCGCGGAGCAACTAAG

CACGTGCACCACGACTACTGAGCCTGTGCTCTAGAGCCCGTTAGCCGCAACTACTGAGCCCACGCACCGCAACTACTGAG

TCTGTGCTCTAGAGCCCGCAAGCCACAACTACTGAGCTCACGTGCCACAACTACTGAAGCCTGCGTGCCTAGAGC-----

---CCGTGCTCCGCAACAAGAGAAGCCACCGCAGTGAGAAGCCCACGCACCGCAACGAAGAGTAACCCCTGCTCACCACA

ACTAGAGAAAGCTGGCGCACAGCAACGACGATCCAACACAGCCAAAAATAAAAACAAACAAATAA--------ATTAAAA

AAAAAA---AAAAGGTGCATGGG---TTCTGACTTCCACTTACCAGGAGGCTGGTCATTTTTCATCATTACGTAGA

>Mesoplodon_bidens

CTT--TGTTTGTTTCAATGTCCTGTTTATCAGAATT---AAAAGGTGCATGGG---GGGCTTCCCTGGTGGCGCAGTGGT

TAAGAATCTGCCTGCCAATGCAAGGGACACGGGTTCGAGCCCTGGCCCGGGAAGATCCCACATGCCGTGGAGCAACTAAG

CCCGTGTGCCACAACTACTGAGCCTGCACTCTATAGCCCGTGAGCCGCAACTACTAAGCCCATGCACCACAACTACTGAG

TCCGCGCTCTAGAGCCCGCAAGCCACAACTACTGAGCCCACGTGCCACAACTACTGAAGCCTGCGTGCCTAGAGC-----

---CCATGCTCCACAACAAGAGAAGCCACCGCAGTGAGAAGCCCATGCACCGCGACGAAGAGTAACCCCTGCTCACCACA

ACTAGAGAAAGCTGGCGCGCAGCAACGACAATCCAACACAGCCAAAAATAAAAACAAACAAATAA--------ATTAAAA

AAAAAA---AAAAGGTGCATGGG---TTCTGACTTCCACTTACCAGGAGGCTGGTCATTTTTCATCATTACGTAGA

>Physeter_catodon

CTTTGTGTTTGTTTCAATGTCCTGTTTATCAGAATT---AAAAGGTGCATGGG---GGGCTTCCCTGGTGGTGCAGTGGT

TAAGAATCTGCTTGCCAATGCAAGGGACATGGGTTCGAGCCCTGGCCCGGGAAGATCCCACATGCCGCGGAGCAACTAAG

CCCGTGCGCCACGACTACTGAGCCTGCACTCTAGAGCCCATGAGCCGCAACTGCTGAGCCCATGCACCACAACTACTGAG

TCCACGCTCTAGAGCCCGCAAGCCACAACTACTGAGCCCACGTGCCACAACTACTGGAGCCTGCGTGCCTAGAGC-----

---CCGTGCTCCGCAACAAGAGAAGCCACCACAGTGAGAAGCCCACGCACCGCAACGAAGAGTAACCCCTACTCACCACA

ACTAGAGAAAGCTGGCCCACAGCAACGACGATCCAACATAGCCAAAAATAA----AAACAAATAA--------ATTAAAA

AAAAA----AAAAGGTGCATGGG---TTCTGACTTCCACTTACCAGGAGGCTGGTCATTTTTCATCATTATGTAGA

>Kogia_breviceps

CTTTGTGTTTGTTTCAATGTTCTGTTTATCAGAGTT---AAAAGGTGCATGGG---GGGCTTCCCTGGTGGTGCAGTGGT

TAAGAATCTGCCTGCCAATGCAAGGGACATGGGTTCGAGCCCTGGCCCGGGAAGATCCCACATGCCGCGGAGCAACTAAG

CCCGTGCACCATGACTACTGAGCCTGCACTCTAGAGCCCGTGAGCTGCAACTGCTGAGCCCATGAACCACAACTACTGAG

TCCACGCTCTAGAGCCCGCAAGCCACAACTACTGAGCCCATGTGCCACAACTACTGAAGCTTGCGTGCCTAGAGCCCGTG

CTCCCGTGCTCCGCAACAAGAGAAGCCACCGCAGTGAGAAGCCCATGCACCGCAACGAAGAGTAACCCCTACTCACCACA

ACTAGAGAAAGCTGGAGCACAGCAACGACGATCCAACATAGCCAAAAATAA----AAACAAATAATTTTTTTTTTTTA--

---------AAAAGGTGCATGGG---TTCTGACTTCCACTTACCAGGAGGCTGGTCATTTTTCATCATTACGTAGA

>Balaenoptera_acutorostrata

CTTTGTGTTTGTTTCAATGTCCTGTTTATCAGAATT---AAAAGGTGCATGGG---------------------------

--------------------------------------------------------------------------------

--------------------------------------------------------------------------------

--------------------------------------------------------------------------------

--------------------------------------------------------------------------------

--------------------------------------------------------------------------------

--------------------------TTCTGACTTCCACTTACCAGGAGGCTGGTCATTTTTCATCATTACGTAGA

>Eschrichtius_robustus

CTTTGTGTTTGTTTCAATGTCCTGTTTATCAGAATT---AAAAGGTGCATGGA---------------------------

--------------------------------------------------------------------------------

--------------------------------------------------------------------------------

--------------------------------------------------------------------------------

--------------------------------------------------------------------------------

--------------------------------------------------------------------------------

--------------------------TTCTGACTTCCACTTACCAGGAGGCTGGTCATTTTTCATCATTACGTAGA

>Hippopotamus_amphibius

CCTTGTGTTTATTTCAATGTCCTATTTATCAGAATT---AAAAGGAGCATGGG---------------------------

--------------------------------------------------------------------------------

--------------------------------------------------------------------------------

--------------------------------------------------------------------------------

--------------------------------------------------------------------------------

--------------------------------------------------------------------------------

--------------------------TTCTGATTTCCACTTACCAGGAGGCTGGTCATTTTTCTTCATTATGTAGA

>Bos_taurus

CTTTGTGTCTGTTTCAATGTCCCATTTACCAGAATT---AAAAGGTGCGTGGG---------------------------

--------------------------------------------------------------------------------

--------------------------------------------------------------------------------

--------------------------------------------------------------------------------

--------------------------------------------------------------------------------

--------------------------------------------------------------------------------

--------------------------TTCTGATTTCCACTTATCAGGAGGCTGGTCCCTTCTCATCATTACGTAGA

**Marker PT10**

>CHR-2B

----------------------------------------------------------GGGACTTCCCTGGTGGTCCAGT

GGTTAAGAATCTGCCTG------CCAATGCAGGGGACACGGGTTCAATCCCTGGTCCGGGAAGATCCCACATGCCGTGGA

GCAACTAAGCCCGTGCGCCACAACTACTGAGCCTGTGC-TCTAGAGCCCGCGAGCCGCAACTACTGAAGCCCGCGCGCCC

TAGAGCCCGTGCTCTGCAACAAGAGAAGCCACCGCAATGAGAAGCCCGCGCACCGCAGCTAGAGAGTAGCCCCCGCTCGC

CGCAACTAGAGAAAGCCCNCGCGCAGCAACGAAGACCCAGCACAGCCAAAAATAAATAAA-TAAA------TAAA-----

------------------------------------------------------------------------

>Tursiops_truncatus

AAATCAGTTTCTAGAACTAGAACTGCCTCATGCTCT-----AAAGACAGGACCTC----GGACTTCCCTGGTGGTGCAGT

GGTTAAGAATCCGCCTG------CCGATGCAGGGGACACGGGTTCGAGCCCTGGTCTGGGAAGATCCCACATGCCGCGGA

GCAACTAGGCCCGTGAGCCACAACTACTGAGCCTGCGCGTCTGGAGCC--------------------------------

-------TGTGCTCCGCAAC--GAGAGGCCGCGATAGTGAGAGGCCCGCGCACTGC-GATGAAGAGTGGCCCTCGCTTGC

CGCAACTAGAGAAAGCCCTCGCACAGCAACGAACACCCAACACAGCCAAAAATAAATAAAATTAANNNNNNAAAAAAAAA

AA---AAAGACAGGACCTC---AACTCCTCAGAGACAACGTTTTATATCTGGAGCTTCCCATCATGCCTCAG

>Mesoplodon_bidens

AAATCAGTTTCTAGAACTAGAACTGCCTCATGCTCT-----AAAGACAAGATTTC----GGGCTTCCCTGGTGGCGCAGT

GGTTAAGAATCTGCCTGGGGGACACAATGCAGGGGACACAGGTTCGAGCCCTGGTCTGGGAAGATCCCACATACCGCGGA

GCAAGTAAGCCCGTGAGCCACAACGACTGAGCCTGCGCGTCTGGAGCC--------------------------------

-------TGTGCTCCGCAAC--GAGAGGCCGCGAGAGTGAGAGGCCCGCGCACCGC-GATGAAGAGTGGCCCCTGCTTGC

CGCAACTAGAGAAAGCCCTCGCACAGAAACGAAGACCCAACACAGCCAAAACTAAATAAAATTTT------TAAA-----

-----AAAGACAGGACCTC---AACTCCTCAGAGACAACGTTTCATATCTGGAGCTTCCCATCATGCCTCAG

>Physeter_catodon

AAATCAGTTTCTAGAACTAGAACTGCCTCATGCTCT-----AAAGACAGGACCTC----GGGCTTCCCTGGTGGCGCCGT

GGTTGAGAATCTGCCTG------TCAATGCAGGGGACACGGGTTCGAGCCCTGGTCTGGGAAGATCCCACATGCCGCGGA

GCAACTAGGCCCGTGAGCCACAACTACTGAGCCTGCGCGTCTGGAGCC--------------------------------

-------TGTGCTCCGCAACAAGAGAGGCCGCGATAGTGAGAGGCCCGCGCACCGC-GATGAAGAGGGGCCCCGGCTTGC

CACAACTAGAGAAAGCCCTCTCACAGAAACGAAGACCCAACACAACCAAAAATAAATAAAATTAA------AAAAAAAA-

-----AAAGACAGGACCGC---AACTCCTCAGAGACAACGTTTTATATCTGGAGCTTCCCATCATGCCTCAG

>Kogia_breviceps

AAATCAGTTTCTAGAACTAGAACTGCCTCATGCTCT-----AAAGACAGGACCTT----GGGCTTCCCTGGTGGCGCCGT

GGTTGAGAATCTGCCTG------CCAATGCAGGGGACACGGGTTCGAGCCCTGGTCTGGGAAGATCCCACATGCCGCGGA

GCAACTAGGCCCGTGAGCCACA-CTACTGAGCCTGCGCGTCTGGAGCC--------------------------------

-------TGTGCTCCGCAACAAGAGAGGCCGCGACAGTGAGAGGCCCGCGCACCGC-TACGAAGAGTGGCCCCGGCTTGC

CGCAACTAGAGAAAGCCCTCTCATAGAAACGAAGACCCAACACAACCAAAAATAAATAAAATTAAAAAAAAAAAAA----

-----AAAGACAGGACCTC---AACTCCTCAGAGACAACGTTTCATATCTGGAGCTTCCCATCATGCCTCAG

>Balaenoptera_acutorostrata

AAATCAGTTTCTAGAACTAGAACTGCCTCATGCTCT-----AAAGACAGGACCTC-------------------------

--------------------------------------------------------------------------------

--------------------------------------------------------------------------------

--------------------------------------------------------------------------------

--------------------------------------------------------------------------------

----------------------AACTCCTCAGAGACAACGTTTCATATCTGGAGCTTCCCATCATGCCTCAG

>Eschrichtius_robustus

AAATCAGTTTCTAGAACTAGAACTGCCTCATGCTCT-----AAAGACAGGACCTC-------------------------

--------------------------------------------------------------------------------

--------------------------------------------------------------------------------

--------------------------------------------------------------------------------

--------------------------------------------------------------------------------

----------------------AACTCCTCAGAGACAACGTTTCATATCTGGAGCTTCCCATCATGCCTCAG

>Hippopotamus_amphibius

AAATCAATCTCTAGAACTAGAGCTACCTCATGCTCTGT---AAAGACAGGACCTC-------------------------

--------------------------------------------------------------------------------

--------------------------------------------------------------------------------

--------------------------------------------------------------------------------

--------------------------------------------------------------------------------

----------------------AACTCCTCAGAGTCAGCGTTTCATATCTGGAGCTTCCCATCATGCCTCAG

>Bos_taurus

AAATCAATTTCTAGAACTA------CCTCATGGTCT-----ACATACAGGACCTC-------------------------

--------------------------------------------------------------------------------

--------------------------------------------------------------------------------

--------------------------------------------------------------------------------

--------------------------------------------------------------------------------

----------------------AACTCATCAGAGCCAGGGTTTCGTATCTGGAGCTTTCCATCATGCTTCAG

**Marker PT37**

>CHR-2

---------------------------------------------------------GGGCTTCCCTGGTGGCGCAGTGG

TTAAGAATCTGCCTGCCAATGCAGGGGACACGGGTTCGAGCCCTGGTCCGGGAAGATCCCACATGCCGCGGAGCAACTAA

GCCCNTGCGCCACAACTACTGAGCCTGCGCTCTAGAGCCCGCGAGCCACAACTACTGAGCCCGCGTGCCACAAC------

----------------TACTGAAGCCCACGTGCCTAGAGCCTGTGCTCCGCAACAAGAGAAGCCACCGCAATGAGAAGCC

CGNGCACCGCAACGAAGAGTAGCCCCCNCTTGCCGCAACTAGAGAAAGCCCGCGCNCAGCAACGAAGACCCAACGCAGCC

--------------------------------------------------------------------------------

----------------------------------

>Tursiops_truncatus

TTCAGGCTGAAAGGATAGGTAGGGGCATCTTCATTT---AAGAGTACCTGCTG---GGGACTTCCCTGGTGGCACAGTGG

TTAAGAATCCGCCTGCCAATGCAGGGGACACAGGTTCGATCCCTGGTCTCAGAAGATCCCACATGCCATGGAGCAACTAA

GCCCGGGCACCACAACTGCTGAGCCTGCGCTCTAGAGCCCACGAGCCACAACTACTGAGCCCGAATGCCACAAC------

----------------TACTGAAGCCCGCGCGCCTAGAGCCCGTGCTCCGCAACAAGAGAAGCCACCACAATGAGAAGCC

TGCACACCACAATGAAGAGTAGCCCCCACTGGCCACAACTGGAGAGAGCCTGCACGCAGCAACGAAGACCCAACACAGCC

ATAAATAAATAAATAAATAAATAAATAA-----ATAATAAAAAA---AAGAGTACCTGCTG---ATGATGGGGGAGGGAG

TAAAGGTGACGGTGAGGGAAGCACAGTTCTCTAT

>Mesoplodon_bidens

TTCAGGCTGGAAGAATAGGTAGGGGCATCTTCATTT---AAGAGTACTTGCTG---GGGACTTCCCTGGTGGCACAGTGG

TTAAGAATCCACCTGCCAATGCAGGAGACACAGGTTTGATCCCTGGTGTCAGAAGATCCCACATGCCACGGAGCAACTAA

GCCCGTGCGCCACAACTGCTGAGCCTGCGCTCTAGAGCCTGCGAGCCACAACTACTGAGCCCGAATGCCACAACTACTGA

GCCCGAGTGCCACAATTACTGAAGCCTGCGCGCCTAGAGCCCGTGCTCCGCAACAAGAAAAGCCACCACAATGAGAAGCC

TGTGCACCGCAACGAAGAGTAGCCCCCACTGGCTGCAACTGGAGAGAGCCTGCACGCGGCAACGAAGACCCAACACAGCC

AAAAATAAATAAATAAATAAATAAACAAACAAATACATAAATAA---AAGAGTACCCGCTG---ATGATGGGGGAGTGAG

TAAAGGTGATGGTGAGGGAAGCACAGCTCTCTAT

>Physeter_catodon

TTCAGGCTGAAAGGATAGGTAGGGGCATCTCCATTT---AAGAGTACCTGCTG---GGGACTTCCCTGGTGGCACAGTGG

TTAAGAATCTGCCTGCCAATGCAGGGGACACGGGTTCGATCCCTGGTCTCTGAAGATCCCACATGCCATGGAGCAACTAA

GCCCGTGCGCCACAGCTGCT------------------------------------GAGCCCGAGTGCCACAAC------

----------------TACTGAAGCCCGCGTCCCTAGAGCCCGTGCTCCACAACAAGAGAAGCCACCACAATGAGAAGCC

TGTGCACCGCAACGAAGAGTAGCCCCCACTGGCCACAACTGGAGAGAGCCTGCACGCAGCAACAAAGACCCAACACAGCC

AAAAATAAATTAATTAATTAATTAA--------TTTAAAAAAAA---AAGAGTACCTGCTG---ATGATGAGGGAAGGAG

TAAAGGTGACGGTGAGGGAAGCACAGTTCTCTAC

>Kogia_breviceps

TTCAGGCTGGAAGGATAGGTAGGGGCATCTTTATTT---AAGAGTACCTGCTG---GGGACTTCCCTGGTGGCACAGTGG

TTAAGAATCCGCCTGCCAATGCAGGGGACACGGGTTCGATCCCTGGTCTCCGAAGATCCCACATGCCATGGAGCGACAAA

GCCCGTGCGCCACAACTGCT------------------------------------GAGCCCGAGTGCCACAAC------

----------------TACTGAAGCCCGTGTCCCTAGAGCCCGTGCTCCGCAACAAGAGAAGCTACCACAATGAGAAGCC

TGCGCACCGCAACAAAGAGTAGCCCCCAATGGCCACAACTGGAGAGAGCCTGCACGCAGCAGCAAAGACCCAACACAGCC

AAAAATAAATAAATAAATTTTT-----------TTTAAAAA------AAGAGTACCTGCTG---ATGATGAGGGAAGGAG

TAAAGGTGATGGTGAGGGAAGCACAGTTCTCTAC

>Balaenoptera_acutorostrata

TTCAGGCTGGAAGGATAGGTAGGGGCATCTTCATTT---AAGAGTACCTGCTG---------------------------

--------------------------------------------------------------------------------

--------------------------------------------------------------------------------

--------------------------------------------------------------------------------

--------------------------------------------------------------------------------

----------------------------------------------------------------ATGATGGGGGAGGGAG

TAAAGGTGACGGTGAGGGAAGCACAGTTCTCTAT

>Eschrichtius_robustus

TTCAGGCTGGAAGGATAGGTAGGGGCATCTTCATTT---AAGAGTACCTGCTG---------------------------

--------------------------------------------------------------------------------

--------------------------------------------------------------------------------

--------------------------------------------------------------------------------

--------------------------------------------------------------------------------

----------------------------------------------------------------ATGATGGGGGAGGGAG

TAAAGGTGACGGTGAGGGAAGCACAGTTCTCTAT

>Hippopotamus_amphibius

TTCAGGCTGGAAGGATAGGTAGGGACACCTTCATTT-----GAGTACCCGCTG---------------------------

--------------------------------------------------------------------------------

--------------------------------------------------------------------------------

--------------------------------------------------------------------------------

--------------------------------------------------------------------------------

----------------------------------------------------------------ATGATGGGGGAGGGAG

TAAAGGTGATGGTGGGGAAAGCACAATCCTATAC

>Bos_taurus

TTCAGGCTGGAAGGACAGGTAGGAGCACCCTCATTT---AAGAGTACCAGCTG---------------------------

--------------------------------------------------------------------------------

--------------------------------------------------------------------------------

--------------------------------------------------------------------------------

--------------------------------------------------------------------------------

----------------------------------------------------------------ATGCTGGGGGAAGGGG

TAAAGGTGACCATGAGGAAAGCACCATGGTATGT

**Marker PT38**

>CHR-2

--------------------------------------------------------------------------------

--------------------------------------------------------------------------------

-------------------------------------------------------------GGGCTTCCCTGGTGGCGCA

GTGGTTAAGAATCTGCCTGCCAATGCAGGGGACACGGGTTCGAGCCCTGGTCCGGGAAGATCCCACATGCCGCGGAGCAA

CTAAGCCCNTGCGCCACAACTACTGAGCCTGCGCTCTAGAGCCCGCGAGCCACAACTACTGAGCCCGCGTGCCACAACTA

CTGAAGCCCACGTGCCTAGAGCCTGTGCTCCGCAACAAGAGAAGCCACCGCAATGAGAAGCCCGNGCACCGCAACGAAGA

GTAGCCCCCNCTTGCCGCAACTAGAGAAAGCCCGCGCNCAGCAACGAAGACCCAACGCAGCC------------------

--------------------------------------------------------------------------------

-

>Tursiops_truncatus

CTCTAATG------------------------------------------------------------------------

--------------------------------------------------------------------------------

-------------AAAGCCTCAGCATCTCCAATTCTCTGTATT---AAAATTGGGATA---GGACTTCCCTGGTGGTGCA

GTGGTTAAGAATCCACCTGCCAGTGCAGGGGACACAGGTTCGTGCCCTGGTCTGGGAAGATCCCACATGTCGCGGAGTAA

CTAAGCCCGTGCGCCACATCTATGGAGCCTGCGCTCTAGAGCCCGCGAGCCACAACTACTGAGCCTGCGTGCCACAACTA

CTGAAGCCCATGAGCTTAAAGCCTGTGCTCTGCAAC--GAGAAGCCACC-CAATGAGAAGCCTGCAAACCGCAACGAAGA

GTAGCCCCCACTCGCCACAACTAGAGAAAGCCCGTGCGCAGCAACAAAGACCTAAGGCAGTCAAAAATAAAAATAAATAA

ATTAAAAATATA---TATATTGGGATA---ATGAGCTACCATGTGGG-TTCGGGTGAGGATAATAAGATAACCCATCTAA

A

>Mesoplodon_bidens

CTCTAAAG------------------------------------------------------------------------

--------------------------------------------------------------------------------

-------------AAAGCCTCAGCCTCTCCAGTTCTCTGTATT---AAAATTGGGATA---GGACTTCCCTGGTGGCGCA

GTGGTTAAGAATCCACCTGCCAGTGCAGGGGACACAGGTTCGTGCCCTAGTCCGGGAAGATCCCACATGTCGTGGAGCAA

CTAAGCCCATGCGCCACAACTATGGAGCCTGCTCTCTAGAGCCCACGAGCCA-AACTACTGAGCCTGCATGCCACAACTA

CTGAAGCCCATGAGCCTAAAGCCCGTGCTCTGCAACAAGAGAAGCCACC-CAATGAGAAGCCTGCAAACCACAATGAAGA

GTAGCCCCCGCTTGCCACAACTAGAGAACGCCCGCGCACAGCAACAAAGACCTAAGGCAGCCAAAAATAAAAATAAATAA

ATTAAAAAAATA---TATATTGGGATA---ATGAGCTACCATGTGGG-TTAGGGTGAGGATAATAAGATAACCCATCTAA

A

>Physeter_catodon

CTCTAATG------------------------------------------------------------------------

--------------------------------------------------------------------------------

-------------AAAGCCTCAGCCTCTCCAGTTCTCTGTATT---AAAATTGGGATA---GGACTTCCCTGGTGGCACA

GTGGTTAAGAATCCAGCTGCCAGTGCAGGCAACACAGGTTCATGCCCTGGTCCAGGAAGATCCCACATGTCGCGGAGCAA

CTAAGCCCCTGCACCACAACTATGGAGCCTGTGCTCTAGAGCCCGCGAGCCACAACTACTGAGCCCGAGTGCCACGACTA

CTGAAGCCCATGCGCCTAAAGCCCGTGCTCTGCAACAAGAGGAGCCACC-CAATGAGAAGCCTGCGAACTGCAACAAAGA

GTAGCCCCCACTCGCTGCAACTAGAGAAAGCCCGCGCACAGCAACAAAGACCTAAGGCAGTCAAAAATAAAAATAAATAA

ATTGAAAAA------AAAATTGGGATA---ATGAGCTACCATGTGGG-TTAGGGTGAGGATAATAAGATAACCCATCTAA

A

>Kogia_breviceps

CTCTAATG------------------------------------------------------------------------

--------------------------------------------------------------------------------

-------------AAAGGCTCAGCCTCTCCAGTTCTCTGTATT---AAAATTGGGACA---GGACTTCCCTGGTAGCACA

GTGGTTAAGAATCCAGCTGCCAGTGCAGGCAACACAGGTTCGTGCCCTGGTCCGGGAAGATCCCACATGTCGCAGAGCAA

CTAAGCCCCTGTGCCACAACTATGGAGCCCGTGCTCTAGAGCCCGCGAGCCACAACTACTGAGCCCGAGTGCCACAACTA

CTGAAGCTCATGTGCCTAAAGCCCGTGCTCTGCAACAAGAGAAGCCACC-CAATGAGAAGCCTGTGAACTGCAACCAAGA

GTAGCCCCCACTTGCTGCAACTAGAGAGAGCCCGTGCATAGCAACAAAGACCTAAGGCAGTCAAAAATAAAAATAAATAA

ATTGAAAA-------AAAATTGGGATA---ATGAGCTACCATGTGGG-TTAGGGTGAGGATAATAAGATAACCCATCTAA

A

>Balaenoptera_acutorostrata

CTTTAATG------------------------------------------------------------------------

--------------------------------------------------------------------------------

-------------AAAGCCTCAGCCTCTCCAGTTCTCTGTATT---AAAATTGGGATA----------------------

--------------------------------------------------------------------------------

--------------------------------------------------------------------------------

--------------------------------------------------------------------------------

--------------------------------------------------------------------------------

------------------------------ATGAGCTACCATGTGGG-TTAGGGTGAGGACAATAAGATAACCCATCTAA

A

>Eschrichtius_robustus

CTTTAATG------------------------------------------------------------------------

--------------------------------------------------------------------------------

-------------AAAGCCTCAGCCTCTCCAGTTCTCTGTATT---AAAATTGGGATA----------------------

--------------------------------------------------------------------------------

--------------------------------------------------------------------------------

--------------------------------------------------------------------------------

--------------------------------------------------------------------------------

------------------------------ATGAGCTACCATGTGGG-TTAGGGTGAGGATAATAAGATAACCCATCTAA

A

>Hippopotamus_amphibius

CTCTAATTAAAGCCTCAATTTAGAGGGCTGGGACAGGGAGGGTGGGAGGGAGTCGCGGGAGGGAGGGGATATGGGGATAT

GTGTATAAATACAGCTGATTCACTTTGGTGTACCTCAAAAACTGGCACAACAGTGTAAAGCAATTATATTCCAATAAAGA

GCTTAAAAAAAAAAAAGCCTCAGCCTCTCCAGTTCAATG-------AGACTTGGGATA----------------------

--------------------------------------------------------------------------------

--------------------------------------------------------------------------------

--------------------------------------------------------------------------------

--------------------------------------------------------------------------------

------------------------------ATGAGCTACCATGTGGG-TTATGGTGAGGAGTGTGAGATAACCCATCTAC

A

>Bos_taurus

CTCTAACT------------------------------------------------------------------------

--------------------------------------------------------------------------------

-------------AAAGTCTCAGCATCTCCTGTTCTCTGTATT---AAAATTGGGATA----------------------

--------------------------------------------------------------------------------

--------------------------------------------------------------------------------

--------------------------------------------------------------------------------

--------------------------------------------------------------------------------

------------------------------GTGAGCTACCATGTGGGTTTATGGTGAGGAGTATGAGATAACCCATCTAA

A

**Marker TB11**

>CHR-2B

--------------------------------------------------------GGGACTTCCCTGGTGGTCCAGTGG

TTAAGAATCTGCCTGCCAATGCAGGGGACACGGGTTCAATCCCTGGTCCGGGAAGATCCCACATGCCGTGGAGCAACTAA

GCCCGTGCGCCACAACTACTGAGCCTGTGCTCTAGAGCCCGCGAGCCGCAACTACTGAAGCCCGCGCGCCCTAGAGCCCG

TGCTCTGCAACAAGAGAAGCCACCGCAATGAGAAGCCCGC---GCACCGCAGCTAGAGAGTAGCCCCCGCTCGCCGCAAC

TAGAGAAAGCCCNCGCGCAGCAACGAAGACCCAGCACAGCCAAAAATAAATAAATAAATAAA------------------

--------------------------------------------------------------------------------

----

>Tursiops_truncatus

TCACTTCCCATATATGCTGTTGTCTTCTGACTCCC---AAAAATGAGCTTCTA---GGGGCTTCCTTGGTGGCACAGTGG

TTGAGAATCTGCCTGCCAATGCAGGGGACACGGGTTCGAGCCTTGGTCTGGGAGGATCCCACATGCCGCGGAGCAGCTGG

GGCCGTGAGCCACAACTACTGAGCCTGTGC--------------------------------------GTCTGGAGCCTG

TTCTCCGCAACAAGAGAGGCCGCGATAGGGAGAGGCCCGC---GCACCGTGA-TGAAGAGTGACCCCTGCTTGCCGCAAC

TAGAGAAAGCCCTTGCACAGAAACGAAGACCCAACACAGCCA---------AAAT---AAATACATTAATTAATT-----

--AATTAA--TT----AAAAATGAGCTTTTA---GATTTGGCAAGGCAGGAAAAACCACACAGATAGAAATGGCCACCAT

CCTC

>Mesoplodon_bidens

TCACTTCCCATATATGCTGTTTTCTTCTGACTCTC---AAAAATGAGCTTTTA---GGGACTTCCCTGGTGGCGCAGTGG

TTGAGAGTCTGCCTGCCGATGCAGGGGACACGGGTTGGAGCCCTGGTCCGGGAAGATCCCACATGCCGTGAAGCAACTGG

GCCCGTGAGCCATGGCCGCTGAGCCTGCGC--------------------------------------ATCCGGAGCCTG

TGCTCCGCAACAAGAGAGGCCGCGACAGGGAGAGGCCCGC---GCACCGTGA-TGAAGAGTGGCCCCTGCTTGCCACAGC

TAGAGAAATCCCTCGCACAGAAACGAAGACCCAACACAGCCAAAAATTAATTAAT---TAATTAATTAATTAATT-----

--AATTAATTTT----AAAAATGAGCTTTTA---GATTTGGCAAGGCAGGAAAAACCACACAGATAGAAATGGCCACCAC

CCTC

>Balaenoptera_acutorostrata

TCACTTCCCATATATGCTGTTGTCTTCTGACTCTC---AAAAATGAGCTTTTA---GGGGCTTCCCTGGTGGTGCAGTGG

TTGAGAATCTGCCTGCCAATGCAGGGGACACGGGTTCGAGCCCTGGTCTGGGAAGATCCCACATGCCACGGAGCAACTGG

GCCCGTGATCCACAACTACTGAGCCTGTGC--------------------------------------GTCTGGAGCCTG

TGCTCCGCAACAAGAGAGGCCGCGATAGTGAGAGGCCCGT---GCACCACGA-TGAAGAGTGGCCCCCGCTTGCCACAAC

TAGAGAAAGCCCTAGCACAGAAACGAAGACCCAACACAGTCAAAAATAAATAAATAAATACATCATTAAATGTTAAAATG

ATAATATTAAAA----AAAAATGAGCTTTTA---GATTTGGCAAGGCAGGAAAAATCACACAGATAGAAATGGCCACCAT

CCTC

>Eschrichtius_robustus

TCACTTCCCATATATGCTGTTGTCTTCTGACTCTC---AAAAATGAGCTTTTA---GGGGCTTCCCTGGTGGCGCAGTGG

TTGAGAGTCTGCCTGCCAATGCAGGGGACANNNNNNNNNNNNNNNNNNNNNNNNNNNNNNNNNNNNNNNNNNNNNNNNNN

NNNNNNNNNNNNNNNNNNNNNNNNNNNNNN--------------------------------------NNNNNNNNNNNN

NNNNNNNNNNNNNNNNNNNNNNNNNNNNNNNNNNNNNNNNNNNNNNNNNNNNNNNNNNNNNNNNNNNNNNNNNNNNNNNN

TAGAGAAAGCCCTAGCACAGAAACGAAGACCCAACACAGTCAAAAATAAATAAATAAATACATCATTAAATGTTAAAATG

ATAATATTAAAAA---AAAAATGAGCTTTTA---GATTTGGCAAGGCAGGAAAAATCACACAGATAGAAATGGCCACCAT

CCTC

>Physeter_catodon

TCACTTCCCATATATGCTGTTGTCTTCTGACTCTC---AAAAATGAGCTTTTA---------------------------

--------------------------------------------------------------------------------

--------------------------------------------------------------------------------

--------------------------------------------------------------------------------

--------------------------------------------------------------------------------

----------------------------------GATTTGGCAAGGCAGGAAAAACCACACAGATAGAAATGGCCACCAT

CCTT

>Kogia_breviceps

TCACTTCCCATATATGCTGTTGTCTTCTGACTCTC---AAACATGAGCTTTTA---------------------------

--------------------------------------------------------------------------------

--------------------------------------------------------------------------------

--------------------------------------------------------------------------------

--------------------------------------------------------------------------------

----------------------------------GATTTGGCAAGGCAGGAAAAACCACACAGATAGAAATGGCCACCAT

CCTC

>Hippopotamus_amphibius

CCACTTCCCTTATATGCTATTGTCTCCTGACTCTC---AAAAATGAGCTTTTA---------------------------

--------------------------------------------------------------------------------

--------------------------------------------------------------------------------

--------------------------------------------------------------------------------

--------------------------------------------------------------------------------

----------------------------------GACACGGCAAGATGGGAAAGAACACACAGATAGAAATGGCCACCAT

CCTC

>Bos_taurus

TCACTTCTCATAAATGCTATTGTCTCCTGA--CTC---AAAAATGAGCTTCTA---------------------------

--------------------------------------------------------------------------------

--------------------------------------------------------------------------------

--------------------------------------------------------------------------------

--------------------------------------------------------------------------------

----------------------------------GACTGGGCAGGGTGGGAAAAAACACACAGATAAAAATGGCCACCGT

CCTC

**Marker BT11**

>CHR-2B

--------------------------------------------------------GGGACTTCCCTGGTGGTCCAGTGG

TTAAGAATCTGCCTGCCAATGCAGGGGACACGGGTTCAATCCCTGGTCCGGGAAGATCCCACATGCCGTGGAGCAACTAA

GCCCGTGCGCCACAACTACTGAGCCTGTGC-TCTAGAGCCCGCGAGCCGCAACTACTGAAGCCCGCGCGCCCTAGAGCCC

GTGCTCTGCAACAAGAGAAGCCACCGCAATGAGAAGCCCGCGCACCGCAGCTAGAGAGTAGCCCCCGCTCGCCGCAACTA

GAGAAAGCCCNCGCGCAGCAACGAAGACCCAGCACAGCCAAAAATAAATAAATAAATAAA--------------------

--------------------------------------------------------------------------------

-----------

>Tursiops_truncatus1

ACCTTTCTCCACTCTCATGTATGATATCTCTAGTATC---AAAATTGTATTGA----GGGCTTCCCTGGTGGCGCAGTGG

TTGAGAATCTGCCTGCTAATGCAGGGGACATGGGTTCGAGCCCTGGTCTGGGAGGATCCCACATGCCGCGGAGCAACTGG

GTCCATGAGCCACAACTATTGAGCCTGTGCGTC---------------------------------------TGGAGCCT

GTGCTCCGCAACGAGAG--GCTGCGATAGTGAGAGGCCCGCGCACTGC-GATGAAGAGTGGTCCCTGCTTGCCACAACTA

GAGAAAGCCCTCGCACAGAAACAAAGACACAACACAGC-AAAAATTAATTAATTAATTAATAAACTCCTACCCCCGACAT

CTTCTTTAAAAAAAAA---------AAAATTGTATTGA---GGCAGGTGGAGAGATGGGTTATGGGATGTTAGGATCCGG

GATACGGACAT

>Tursiops_truncatus2

ACCTTTCTCCACTCTCATGTATGATATCTCTAGTATC---AAAATTGTATTGA----GGGCTTCCCTGGTGGCGCAGTGG

TTGAGAATCTGCCTGCTAATGCAGGGGACATGGGTTCGAGCCCTGGTCTGGGAGGATCCCACATGCCGCGGAGCAACTGG

GTCCATGAGCCACAACTATTGAGCCTGTGCGTC---------------------------------------TGGAGCCT

GTGCTCCGCAACGAGAG--GCTGCGATAGTGAGAGGCCCGCGCACTGC-GATGAAGAGTGGTCCCTGCTTGCCACAACTA

GAGAAAGCCCTCGCACAGAAACAAAGACACAACACAGC-AAAAATTAATTAATTAATTAATAAACTCCTACCCCCGACAT

CTTCTTTAAAAAAAA----------AAAATTGTATTGA---GGCAGGTGGAGAGATGGGTTATGGGATGTTAGGATCCGG

GATACGGACAT

>Mesoplodon_bidens

ACCTTTCTCCACTCTCATGTATGATATCTCTAGTATC---AAAATTGTATTGA----GGGCTTCCCTGGTGGCGCAGTGG

TTGAGAATCTGCCTGCTAATGCAGGAGACACAGGTTCGAGCCCTGGTCTGGGAGGATCCCACATGCCGCGGAGCAACTGG

GCCCGTGAGCCACAACTACTGACCCTGCGCGTC---------------------------------------TGGAGCCT

GTGCTCCGCAACAAGAGAGGCCGCGATAGTGAGAGGCCCGCTCACCGC-AATGAAGAGTGGCCCCCACTTGCCACAACTA

GAGAAAGCCCTCACACAGAAACAAAGACACAACACAGCC-AAAATTAATTAATTAATTAATTAACTCCTACCCCCAACAT

CTTCTTTAAAAAA------------AAAATTGTATTGA---GGCAGGTGGGGAGATGGGTTATGGGATGTTAGGACCCGG

GATACGGACAT

>Balaenoptera_acutorostrata

ACCTTTCTCCACTCTCGTGTGTGATATCTCTAGTATC---AAAATTGTATTGA----GGGTTTCCCTGGTGGCGCAGTGG

TTGAGAATCTGCCTGCTAATGCAGGGGACACGGGTTCGCGCCCTGGTCTGGGAAGATCCCACATGCCGCGGAGCGACTAG

GCCCATGAGCCACAACTCCTGAGCCTGCGCGTC---------------------------------------TGGAGCCT

GTGCTCCGCAACAAGAGAGGCCACGATAGTGAGAGGCCCGCGCACCGC-GATGAAGAGTGGCCCCCACTTGCCGCAACTA

GAGAAAGCCCTAGCAGAGAAACGAAGACCCAACATAGC----AATCAATCAATCAATCAAT-------------------

---CTTTAAAAAAAAAA--------AAAATTGTATTGA---GGCAGGTGGGGAGATGGGTTATGGGATGTTAGGACCCTG

GATATGGACAT

>Eschrichtius_robustus

ACCTTTCTCCACTCTCATGCGTGGTATCTCTAGTATT---AAAATTGTATTGA----GGGCTTCCCTGGTGGCGCAGTGG

TTGAGAATCTGCCTGCTAATGCAGGGGACANNNNNNNNNNNNNNNNNNNNNNNNNNNNNNNNNNNNNNNNNNNNNNNNNN

NNNNNNNNNNNNNNNNNNNNNNNNNNNNNNNNN---------------------------------------NNNNNNNN

NNNNNNNNNNNNNNNNNNNNNNNNNNNNNNNNNNNNNNNNNNNNNNNNNNNNNNNNNNNNNNNNNNNNNNNCCGCAACTA

GAGAAAGCCCTAGCAGAGAAACGAAGACCCAACATAGC----AATCAATCAAT---------------------------

---CTTTAAAAAAAAAAAAGAA---AAAATTGTATTGA---GGCAGGTGGGGAGATGGGTTATGGGATGTTAGGACCCGG

GATACGGACAT

>Physeter_catodon

ACCTTTCTCCACTCTCATGCATGATATCTCTAGTATC---AAAATTGTATTGA---------------------------

--------------------------------------------------------------------------------

--------------------------------------------------------------------------------

--------------------------------------------------------------------------------

--------------------------------------------------------------------------------

-----------------------------------------GGCAGGTGGGGAGATGGGTTATGGGATGTTAGGACCTGG

GATACGGACAT

>Kogia_breviceps

ACCTTTCTCCACTCTCACGCATGATATCTCTAGTATC---AAAATTGTATTGA---------------------------

--------------------------------------------------------------------------------

--------------------------------------------------------------------------------

--------------------------------------------------------------------------------

--------------------------------------------------------------------------------

-----------------------------------------GGCAGGTGGGGAGATGGGTTATGGGATGTTAGGACCTGG

GATACGGACAT

>Hippopotamus_amphibius

ACCTTTCTCCACTCTCATGC-TGATATCTCTAGTATC---AAAATTGTATTGA---------------------------

--------------------------------------------------------------------------------

--------------------------------------------------------------------------------

--------------------------------------------------------------------------------

--------------------------------------------------------------------------------

-----------------------------------------TACAGGTGGGGAGATGGGTTATGGGATGTTGGGACCCAG

GATATGAACAT

>Bos_taurus

ACCTTTCTCCACTCTCACGCACGGTATTTTTAGTATC----GAATAGTATTGA---------------------------

--------------------------------------------------------------------------------

--------------------------------------------------------------------------------

--------------------------------------------------------------------------------

--------------------------------------------------------------------------------

-----------------------------------------TGTGGGTGGGGAGATGGGCTATGGGATGGTGGAACTTGG

GAGCTAGACAT
