# Supplementary material for: The multicomparative 2-n-way genome suite
Source: HighWire-hosted journal article supplement (doi:10.1101/gr.262261.120), 2020-07-29
Supplement: SupplementalDataS4.docx [file SupplementalDataS4.docx]

**Alignments for Example 6**

**Novel exon gain**

**IFNAR2**

>AluJr

-------------------TTT----G---AGACAGGGTCTCGCTCTGTCGCCCAGGCTGGAGTGCAGTGGC--------

---GCGATCATAGCTCACTGCAGCCTCGAACTCCTGGGCTCAAGCGATCCTCCCGCCTCAGCCTCCCGAGTAGCTGGGAC

TACAGGCGCGCGCCACCACGCCCGGC-------TAA---TTTTTATATTTTTTGTAGAGACGGGGTCTCGCTATGTTGCC

CAGGCTGGTCTCGAACTCCTGGCCTCAAGCGATCCTCCCGCCTCGGCCTCCCAAAGTGCTGGGATTACAGGCGTGAGCCA

CCGCGCCCGGCC

>Homo_sapiens

TTATTTTT-----TATTTTTTT---AG---AGGCAAGGTCTCGCTAA-------GGGCTGGAATGCAGTGGCTATTCACA

GGTGCAGTCATAATGCACTACAGTCTGAAACTCCTGAGCTCAAACAGTCGTCCTGCCTAAGCTTCCCCAGTAGCTGGGAT

TACAAGCGTGCATCCCTGTGCCCCAGTGAT---TAA---GTTTTATTATGTAGAA---------A---------------

--------------------------------------------------------------------------------

------------

>Pan_troglodytes

TTATTTTT-----TATTTTTTT---AG---AGGCAAGGTCTCGCTAA-------GGGCTGGAGTGCAGTGGCTATTCACA

GGCGCAGTCATAATGCACTACAGTCTGAAACTCCTGAGCTCAAACAATCGTCCTGCCTAAGCTTCCCCAGTAGCTGGGAT

TACAAGCGTGCATCCCTGTGCCCCAGTGAT---TAA---GTTTTATTATGTAGAA---------A---------------

--------------------------------------------------------------------------------

------------

>Pan_paniscus

TTA-TTTT-----TATTTTTTT---AG---AGGCAAGGTCTCGCTAA-------GGGCTGGAGTGCAGTGGCTATTCACA

GGCGCAGTCATAATGCACTACAGTCTGAAACTCCTGAGCTCAAACAATCGTCCTGCCTAAGCTTCCCCAGTAGCTGGGAT

TACAAGCGTGCATCCCTGTGCCCCAGTGAT---TAA---GTTTTATTATGTAGAA---------A---------------

--------------------------------------------------------------------------------

------------

>Gorilla_gorilla

TTATTTTT-----TA-TTTTTT---AG---AGGCAAGGTCTCGCTAA-------GGGCTGGAGTGCAGTGGCTATTCACA

GGCGCAGTCATAATGTACTACAGTCTGAAACTCCTGAGCTCAAACAGTCGTCCTGCCTAAGCTTCCCCAGTAGCTGGGAT

TACAAGCGTGCATCCCTGTGCCCCAGTGAT---TAA---GTTTTATTATGTAGAA---------A---------------

--------------------------------------------------------------------------------

------------

>Nomascus_leucogenys

TTATTTTT-----TATTTTTTT---AG---AGGCAAGGTCTCGCTAA-------GGGTTGGAGTGCAGTGGCTATTCACA

GGCGCGGTCGTAATGCACTACAGTCTGAAACTCCTGAGCTCAAACAGTCGTCCTGCCTAAGCTTCCCCAGTAGCTGGGAT

TACGAGCGTGCATCCCTGTGCCCCAATGAT---TAA---GTTTTATTATGTAAAA---------A---------------

--------------------------------------------------------------------------------

------------

>Macaca_mulatta

TTATTTTT-----TATTTTTTT---AG---AGGCAAAGTCTTGCTAA-------GGGCTGGAGTGCAGTGGCTATTCACA

GGCGCGATCATAATGCACTACAATCTGAAACTCCTGAGCTCAAACAGTCGTTCTGCCTAAGCTTCCCCAGTAGCTGGAAT

TACAAGCGTGCATCCCTGAGCCCCAGTGAT---TAA---GTTTTATTATGTAAAA---------A---------------

--------------------------------------------------------------------------------

------------

>Macaca_fascicularis

TTATTTTT-----TATTTTTCT---AG---AGGCAAAGTCTTGCTAA-------GGGCTGGAGTGCAGTGGCTATTCACA

GGCGCGATCATAATGCACTACAGTCTGAAACTCCTGAGCTCAAACAGTCGTTCTGCCTAAGCTTCCCCAGTAGCTGGAAT

TACAAGCGTGCATCCCTGAGCCCCAGTGAT---TAA---GTTTTATTATGTAAAA---------A---------------

--------------------------------------------------------------------------------

------------

>Papio_anubis

TTATTTTT-----TATTTTTTT---AG---AGGCAAAGTCTTGCTAA-------GGGCTGGAGTGCAGTGGCTATTCACA

GGCGCGATCATAATGCACTACAGTCTGAAACTCCTGAGCTCAAACAGTCGTTCTGCCTAAGCTTCCCCAGTAGCTGGAAT

TACAAGCGTGCATCCCTGAGCCCCAGTGAT---TAA---GTTTTATTATGTAAAA---------A---------------

--------------------------------------------------------------------------------

------------

>Chlorocebus_sabaeus

TTATTTTT-----TATTTTTTT---AG---AGGCAAAGTCTTGCTAA-------GGGCTGGAGTGCAGTGGCTATTCACA

GGCGCGATCATAATGCACTACAGTCTGAAACTCCTGAGCTCAAACAGTTGTTCTGCCTAAGCTTCCCCAGTAGCTGGAAT

TACAAGCGTGCATCCCTGAGCCTCAGTGAT---TAA---GTTTTATTATGTAAAA---------A---------------

--------------------------------------------------------------------------------

------------

>Rhinopithecus_roxellana

TTATTTTT-----TATTTTTTT---AG---AGGCAAGGTCTCGCTAA-------GGGCTGGAGTGCAGTGGCTATTCACA

GGCGCGATCATAATGTACTACAGTCTGAAACTCCTGAGCTCAAACAGTCGTTCTGCCTAAGCTTCCCCAGTAGCTGGAAT

TACAAGCGTGCATCCCTGAGCCCCAGTGAT---TAA---GTTTTATTATGTAAAA---------A---------------

--------------------------------------------------------------------------------

------------

>Saimiri_boliviensis

TTATTTGTTTTTTTATTTTTTT---AG---CAGCAAGGTCTCGCTAA-------GGGCTGGAGTGCAATGGCTATTCACA

GGCATGATCACAATGCACTACAGCCTCAAACTCCTGAGCTCAAACAGCCGTCCTGCCTAAGCCTCCCCAGTAGCTGGGAT

TACAGGCGTGTGTCTCTGTGCCCCAGTGAT---TAA---GTTTTATTATGTAAA--------------------------

--------------------------------------------------------------------------------

------------

>Tarsius_syrichta

TTATTTTTATT--TATTTATTC---AG---AGACGGGGTCTTGCTAAATTGCCCAGGGTGGAGTGCAGTGGCTATTCACA

GGCACCATCATAGCACACTTCGGTCTCAAAGTCCCAGGCTCAAGCAATCCTCCAGCTTCAGCCTCCTGAGTAGCTTGGAC

CACAGGCACCCATCACCACATCTGGTTCAT---TAA---GTTTTATTATGTAAAAAAAAATAATA---------------

--------------------------------------------------------------------------------

------------

>Otolemur_garnettii

TTAATTTT-----TTTTTTCTT---AG---AACCAGGGTCTTGCTATGTTGCCTGGGCTGGAGTGCAGTGGCTATTCACA

GATGCAGTCACAGCCCACTGCAGCCTCGAACTCATGAGTTCAAGCAGTCCTCC--CTGAAGTCTCCCAAGTGATTGGGAC

GACAGGCACATGCCACCACACCCGGCTCAT---TAA---GTTTTATTGTGTGACA---------T---------------

--------------------------------------------------------------------------------

------------

**BAHCC1**

>AluJb

--------------------------------------------------------------------------------

--------------------------------------------------------------------------------

--------------------------------------------------------------------------------

--------------------------------------------------------------------------------

--------------------------------------------------------------------------------

--------------------------------------------------------------------------------

-------GAGACAGGG--------TCTCGCTCTGTCGCCCAGGCTGGAGTGCAGTGGCGCGATCACGGCTCACTGCAGCC

TCGACCTCCCGGGCTCAAGCGATCCTCCTGCCTCAGCCTCCCGAGTAGCTGGGACTACAGGCGCGCGCCACCACGCCCGG

-----CTAATTTTTGTA-----TTTTTTGT---AG---AG---ACGGGGTTTCACCATGTTGCCCAGGCTGGTCTCGAAC

TCCTGGGCTCAAGTGATCCTCCCGCCTCGGCCTCCCAAAGTGCTGGGATTACAGGCGTGAGCCACCGCGCCCGGCC----

--------------------------------------------------------------------------------

--------------------------------------------------------------------------------

--------------------------------------------------------------------------------

--------------------------------------------------------------------------------

--------------------------------------------------------------------------------

--------------------------------------------------------------------------------

--

>Homo_sapiens

CTATTTGATTCTCTCTGAGTGGGACTGAGAGGTCACACTGGAAAC-CGTGTGGCGAACAT-AAAACCCGTCCTAGTTTCA

CAGTCAGGAGATGGAGCTAGCAGAGGG--TTTTTCCG-T------------TTTTTT-----------------------

-CCCTTCG--TTTTTT----------------------TTT-T--CTTTTTTTTGCAGTTAATGGGACATGATGCCTCTG

ACATGCTGCCGGCTTGTTCTGGTTCAGGGAAAACCCTGATTAAAGCATCATGTTTTACAAATTCCCCC--TTTTCTGGTT

--ACCCACAGCATACCATGCCAGAGATGGCTCCTGAGGCCACCCCCAGCCCCGGCAGCCAGGGTTGTTGGGGGGAGCTTC

AAGGCCACTCTTTAGGGGAATGAGGGCCTGGCCTCAGGCTGCTCACACCTTTTTTTTTTTTTTTTTTTTTTTTTTTTTTT

TTTTTTTGAGACAGGG------TATCTCCCTATGTCGCCCAGTCTGGAGTGCAGTGACGCGAACATGGTTCACTGCAGCC

TCGGCCTCCTGGGCTCAAGCCATCCTCCCACCTCAGCCTCCTGTGTAGCTTGGACCACAGGCATGCACCACCACGCCCAG

-----CTCATTGTTCTTTAA-TTTTTTTGT---AG---TG---GCACGTGCTCACTCTGTTGCCCACGCTGGTC------

---------TCGAATTCCTGGCCTCAA---ATGATCCATCCACCTCAGCCTCCCAAAGTTTTGGGATTACAG---GT---

GTGAGCTACTGCACCCAGCC-----AGGTTGCCCCCTTAATTAACG-------TAACCCTTTCCCCGCCACCAGTCTTGC

AGACCTG--CAGCTAGCCCAGGGCCCTTCCGCACGGGCTTGGGTC-------TGAGGGTTCGAGGCCACTGTCCTCCGTC

CTATCGCAG-GACACCCCCT-CACCACCACTCCCAGCTCCCTGCTGACCTGT--CCCC------------------TCCT

TTGCAGACCTGCCTCCCGGATACCTGCGCCCCATGGCTGGCCTGGGCTTCTCC------CTACCCTCAGACGTGCACTCT

TCTAACCTCGAGGACCCTGAAACTATGCAAACCACCGCCCCGGGGGCCCAGCCTGAGCCCACAAGGACATTCCTGCCTGG

GGAGCCGCCTCCCTGCAGCCCCAGGAGCCTGGAGGAG---CCCGGGCTGCTCTCAGGGGCCAGGGAGGCCACCCAGGACC

TT

>Pan_troglodytes

CTATTTGATTCTCTCTGAGTGGGACTGAGAGGTCACACTGGAAAC-CGTGTGGCGAACAT-AAAACCCGCCCTAGTTTCA

CAGTCAGGAGATGGAGCTAGCAGAGGG--TTTTCCAG-T------------TTTTTT-----------------------

-CCCTTCG--TTTTTT----------------------TTT-T--CTTTTTTTTGCAGTTAATGGGACATGATGCCTCTG

ACATGCTGCCGGCTTGTTCTGGTTCAGGGAAAACCCTGATTAAAGCATCATGTTTTACAAATTCCCCC--TTTTCTGGTT

--ACCCACAGCACACCATGCCAGAGATGGCTCCTGCGGCCACCCCCAGCCCAGGCAGCCAGGGTTGTTGGGGGGAGCTTC

AAGGCCACTCTTTGGGGGAATGAGGGCCTGGCCTCAGGCTGCTCATACC-------------TTTTTTTTTTTTTTTTTT

TTTTTTTGAGACAGGG------TATCTCCCTCTGTCGCCCAGTCTGGAGTGCAGTGACACGAACATGGTTCACTGCAGCC

TCGGCCTCCTGGTCTCAAGCCATCCTCCCACCTCAGCCTCCTGTGCAGCTTGGACCACAGGCATGCACCACCACGCCCAG

-----CTCATTGTTCTTTAA-TTTTTTTGT---AG---TG---GCACGTGCTCACTCTGTTGCCCATGCTGGTC------

---------TCGAATTCCTGGCCTCAA---ATGATCCACCCACCTCAGCCTCCCAAAGTTTTGGGATTACAG---GT---

GTGAGCTACTGCACCCAGCC-----AGGTTGCCCCCTTAATGAACG-------TAACACTTTCCCCGCCACCAATCTTGC

AGACCTG--CAGGTAGCCCAGGACCCTTCCGCACGGGCTTGGGTC-------TGAGGGTTCGAGGCCACTGTCCTCCGTC

CTAAGGCAG-GACACCCCCT-CACCACCACTCCCAGCTCCCTGCTGACCTGT--CCCC------------------TCCT

TTGCAGACCTGCCTCCCGGATACCTGCGCCCCATGGCTGGCCTGGGCTTCTCC------CTACCCTCAGACGTGCACTCT

TCTAACCTCGAGGACCCTGAAACTATGCAAACCGCCGCCCCGGGGGCCCAGCCTGAGCCCACAAGGACATTCCTGCCTGG

GGAGCCGCCTCCCTGCAGCCCCAGGAGCCTGGAGGAG---CCCAGGCTGCTCTCAGGGGCCAGGGAGGCCACCCAGGACC

TT

>Pan_paniscus

CTATTTGATTCTCTCTGAGTGGGACTGAGAGGTCACACTGGAAAC-CGTGTGGCGAACAT-AAAACCCGTCCTAGTTTCA

CAGTCAGGAGATGGAGCTAGCAGAGGG--TTTTTCAG-T------------TTTTTT-----------------------

-CCCTTCG--TTTTTT----------------------TTT-C--TTTTTTTTTGCAGTTAATGGGACATGATGCCTCTG

ACATGCTGCCGGCTTGTTCTGGTTCAGGGAAAACCCTGATTAAAGCATCATGTTTTACAAATTCCCCC--TTTTCTGGTT

TACCCCACAGCACACCATGCCAGAGATGGCTCCTGCGGCCACCCCCAGCCCAGGCAGCCAGGGTTGTTGGGGGGAGCTTC

AAGGCCACTCTTT-GGGGAATGAGGGCCTGGCCTCAGGCTGCTCTCACC---------------------TACTTTTTTT

TTTTTTTGAGACAGGG------TGTCTCCCTCTGTCGCCCAGTCTGGAGTGCAGTGACACGAACATGGTTCACTGCAGCC

TCGGCCTCCTGGGCTCAAGCCATCCTCCCACCTCAGCCTCCTGTGCAGCTTGGACCACAGGCATGCACCACCACGCCCAG

-----CTCATTGTTCTTTAA-TTTTTTTGT---AG---TG---GCACGTGCTCACTCTGTTGCCCATGCTGGTC------

---------TCGAATTCCTGGCCTCAA---ATGATCCACCCACCTCAGCCTCCCAAAGTTTCGGGATTACAG---GT---

GTGAGCTACTGCACCCAGCC-----AGGTTGCCCCCTTAATGAACG-------TAACACTTTCCCCGCCACCAGTCTTGC

AGACCTG--AAGCTAGCCCAGGACCCTTCCGCACGGGCTTGGGTC-------TGAGGGTTCGAGGCCACTGTCCTCCGTC

CTAAGGCAG-GACACCCCCT-CACCACCATTCCCAGCTCCGTGCTGACCTGT--CCCC------------------TCCT

TTGCAGACCTGCCTCCCGGATACCTGCGCCCCATGGCTGGCCTGGGCTTCTCC------CTACCCTCAGACGTGCACTCT

TCTAACCTCGAGGACCCTGAAACTATGCAAACCGCCGCCCCGGGGGCCCAGCCTGAGCCCACAAGGACATTCCTGCCTGG

GGAGCCGCCTCCCTGCAGCCCCAGGAGCCTGGAGGAG---CCCAGGCTGCTCTCAGGGGCCAGGGAGGCCACCCAGGACC

TT

>Gorilla_gorilla

CTATTTGATTCTCCCTGAGTGGGACTGAGAGGTCACACTGGAAAC-CGTGTGGCGAACAT-GAAACCCGTCCTAGTTTCA

CAGTGAGGAGACAGAGCCAGCAGAGGG--TTTTTCAG-T------------TTTTTT-----------------------

-GCCTTAG--TTTTTTTTTCTTT--------------CTTT-C--TTTTTTTTTGCAGTTAATGGGACGTGATGCCTCTG

ACATGCTGCTGGCTTGTTCTGGTTCAGGGAAAACCCTGATTAAAGCATCATGTTTTACAAATTCCCCC--CTTTCTGGTT

--ACCCACAGCACACCATGCCAGAGATGGCTCCTGAGGCCACCCCCAGCCCAGGCAGCCAGGGTTGTTGGGGGGAGCTTT

AGGGCCACTCTTTGGGGGAATGAGGGCCCAGCCTCAGGCTGCTCACACT---------------------TTTTTTTTTT

TTTTTTGGAGACAGGG------TGTCTCCCTCTGTCGCCCAGTCTGGAGTGCAGTGACGCGAACATGGTTCACTGCAGCC

TCGGCCTCCTGGGCTCAAGCCGTCCTCCCACCTCAGCCTCCTGTGTAGCTTGGACCGCAGGCATGCACCACCACGCCCAG

-----CTCATTGTTCTTTAA-TTTTTTTGT---AG---TG---GCACGTGCTCACTCTGTTGCCCAGGCTGGTC------

---------TCGAATTCCTGGCCTCAA---ATGATCCACCCACCTCAGCCTCCCAAAGTTTTGGGATTACAG---GT---

GTGAGCTACTGCACCCAGCC-----AGGTTGCCCCCTTAATTAACG-------TAACACTTTCCCCGCCACCAGTCTTGC

AGACCTG--CAGCTAGCCCAGGACCCTTCTTCACGGGCTTGGGTC-------TGAGGGTTCGAGGCCACTGTCCTCCGTC

CTATCGCAG-GACACCCCCT-CACCACCACTCCCAGCTCCCTGCTGACCTGT--CCCC------------------TCCT

TTGCAGACCTGCCTCCCGGATACCTGCGCCCCGTGGCTGGCCTGGGCTTCTCC------CTACCCTCAGACGTGCACTCT

TCTAACCTCGAGGACCCTGAAACTATGCAAACCGCCGCCCTGGGGGCCCAGCCTGAGCCCACAAGGACATTCCTGCCTGG

GGAGCCGCCTCCCTGCAGCCCCAGGAGCCTGGAGGAG---CCCGGGCTGCTCTCAGGGGCCAGGGAGGCCACCCAGGACC

TT

>Pongo_abelii

CTATTTGATTCT--CTGAGTGGGACTGAGAGTTCACACTGGAAAC-CGTGTGGCGAACAT-AAAACCCGTCCTAGTTTCA

CAGTCAGGAGATGTAGCCAGCGGAGGG--TTTTTCAG-T------------TTTTTT-----------------------

-CCCTTAG--TTTTTTTTGTTTT--------------TTTTGT--TTTTTTTTTGCAGTTAATGGGACGTGATGCCTCTG

ACATGCTGCCGGCTTGTTCTGGTTCAGGGAAAACCCTGATTGAAGCATCATGTTTTACAAGTTCCCCC---TTTCTGGTT

--ACCCACAGCACACCATGCCAGAGATGGCTCCGAAGGCCACCCCCAGCCCAGGTGGCCAGGGTTGTTGGGGGGAGCTTT

AAGGCCACTCTTTGGGGGAACGAGGGCCTGGCCTCAGGCTGCTCACACT--TTTTTTTTTTTTTTTTTTTTTTTTTTTTT

TTTTTTTGAGACAGGG------TGTCTCCCTCTGTCGCCCAGGCTGGAGTGCAGTGGCGCGAACATGGTTCACTGCAGCC

TCGGCCTCCTGGGCTCAAGCCATCCTCCCACCTCAGCCTCCTGTGTAGCTTGGACCACAGGCATGCACCACCACGCCCAG

-----CTCATTGTTCTTTAA-TTTTTTTGT---AG---TG---GCACGTGCTCACTCTGTTGCCCAGGCTGGTC------

---------TCGAATTCCTGGCCTCAA---ATGATCCACCCACCTCAGCCTCCCAAAGTTTTGGGATCACAG---GC---

ATGAGCCACTGCACCTGGCC-----AGGTTGCCCCCTTCATTAACG-------TAAAACTTTCCCCGCCACCAGTCTCGC

GGACCTG--CAGCTAGCCCAGGACCCTTCCGCACGGGCTTGGGTC-------TGAGGGTTTGAGGCCACTGTCCTCCGTC

CTATCGCAG-GACACCCCCT-TACCACCACTCCCAGCTCCCTGCTGACCTGT--CCCC------------------TCCT

TTGCAGACCTGCCTCCCGGATACCTGCGCCCCGTGGCTGGCCTGGGCTTCTCC------CTACCCTCAGACGTGCACTCT

TCTAACCTCGAGGACCCTGAAACTATGCAAACCGCTGCCCCGGGGGCCCAGCCTGAGCCCACAAGGACATTCCTGCCTGG

GGAGCCGCCTCCCTGCAGCCCCAGGAGCCTGGAGGAG---ACCGGGCTGCTCTCAGGGGCCAGGGAGGCCACCCAGGACC

TT

>Nomascus_leucogenys

CTATTTGATTCTCTCTGAGTGGGACTGAGAGTTCACACTGGAAAC-CATGTGGCGAACAT-AAAACCCGTCCTACTTTCA

CAGTCAGGAGACGGAGCCAGCAGAGGG--TTTTTCAG-T------------TTTTTT-----------------------

-CCCTTAGCTTTTTTTTTTTTTT--------------TTTTTT--TTTTTTTTTGCAGTTAATGGGACGTGATGCCTCTG

AAATGCTGCCGGCTTGTTCTGGTTCAGGGAAAACCCTGATTGAAGCATCATGTTTTACAAATTCCCCC--TTTTCTGGTT

--ACCCACAGCACACCATGCCAGAGATGGCTCCTGAGGCCACCCCCAGCCCAGGCGGCCAGGGTTACTGGGGGGAGCTTT

AAGGCCACTCTTTGGGGGAATGAGGGCCTGGCCTCAGGTTGCTCACACT---------TTTTTTTTTTTTTTTTTTTTTT

TTTTTTTGAGACAGGG------TGTCTCCCTCTGTTGCC------------CAGTGGCGCGAACATGGTTCACTGCAGCC

TCAGCCTCCTGGGCTCAAGCCATCCTCCCACCTCAGCCTCCTGTGTAGCTTAGACCATAGGCATGCACCACCACACCCAG

-----CTAATTGTTCTTTAATTTTTTTTGT---AG---TG---GCACGTGCTCACTCTGTTGTCCAGGCTGGTC------

---------TCGAATTCCTGGCCTCAA---ATGATCCACCCACCTCAGCCTCCCAAAGTTTTGGGATTACAG---GC---

GTGAGCCACTGCACCCGGCC-----AGGTTGCCCCCTTAATTAACG-------TAACACTTTCCCCGCCACCAGTCTCGC

AGACCTG--CAGCTAGTGCAGGACCCTTCCGCACGGGCTTGGGTC-------TGAGGGTTCGAGGCCACTGTCCTCTGTC

CTATCACAG-GACACCCCCT-CACCACCACTCCCAGCTCCCTGCTGACCTGT--TCCC------------------TCCT

TTGCAGACCTGCCTCCCGGATACCTGCGCCCTGTGGCTGGCCTGGGCTTCTCC------CTACCCTCAGACGTGCACTCT

TCTAACCTCGAGGACCCTGAAACTATGCAAACCGCCACCCCAGGGGCCCAGCCTGAGCCCACAAGGACATTCCTGCCTGG

GGAGCCGCCTCCCTGCAGCCCCAGGAGCCTGGAGGAG---CCCGGGCTGCTCTCAGGGGCCAGGGAGGCCACCCAGGACC

TT

>Colobus_angolensis

CTATTTGGCTCTGTCTGAATGGGGCTGAGAGTTCACGCTGAAAAC-CGCGTGGCGAACAT-AAAACCCGGCCTAGTTTCA

CGGTCAGGAGACGGGGCCAGCGGAGGGTTTTTTTCAG-T------------TTTACT-----------------------

-CCCTTAG-----TTTTTTGTTGTTTTTTTTTTTGTTTTTTTT--TTTTCTTCTGCAGTTAATGGGACGTGATGCCTCTG

ACATGCTGCCGGCTCGTTCTGGTTCAGGGAAAACCCTGATTCAAGCATCATGTTTTACAAATTTCTCC--TTTTCTGGTT

--ACCCACAGCACACCATGCCAGACATGGCTCCTGAGGTCA-CCCCAGCCCGGGTGGCCAGGGTTGTC-GGAGGAACATT

AGAGCCACTCAGCGGGGGAATGTGGGCCTGGCCTTAGGCTGCTTACAC-----------------TTTTCTTTTTCTTTA

TTTTTTTGAGACAGGG------TGTCTCCCTCTGTCGCCCAGGCTGGAGTGTGGTGGCGCGAACATGGTTCACTGCAGCC

TCGGCCTCCTGGGCTCAAGCCATCCTCCTACCTCAGCCTCCCATGTAGCTTGGACCACGGGCATACACCACCACGCCCAG

-----CTAATTGTTCTTTTA-TTTTTTTGT---AG---TG---GTGCGTG--CACTCTGTTGCCCAGGCTGGTC------

---------TTGAACTCCTGGCCTT-A---ATGATCCTCCCTCCTCAGCCTTCCAAAGTATTGAGGTTACAG---GC---

GTGAGCCACTGTGCCCAGCC-----AGGCTGCCCCCTTAATTAACGT------TAACACTTTCCCCGCCACCAGTCTTGC

AGACCTG--CAGCTAGCCCAGGACCCTTCCGCATGGGCTTGGGTC-------TGAGGGTTCGAGGTCACTGTCCTCCGTC

CTATCGCAG-GACACCCCCT-CACCACCACTCCCAGCTCCCTGCTGACCTGT--CCCC------------------TCCT

TTGCAGACCTGCCTCCCGGATACCTGCGTCCCGTGGCTGGCCTGGGCTTCTCC------CTACCTTCAGACGTGCACTCT

TCTAACCTCGAGGACCCTGAAACTATGCAAACCGCCACCCTGGGGGCCCAGCCTGAGCCCACAAGGACATTCCTGCCTGG

GGAGCCACCTCCCTGCAGCCCTAGGAGCCTGGAGGAG---CCCGGGCTGCTCTCAGGGGCCAGGGAGGCCACCCAGGACC

TT

>Cercocebus_atys

CTGTTTGATTCTGTCTGAATGGGGCT--GAGTTCACGCTGGAAAC-CGTGTGGCGAACAT-AAAACCCGTCCTAGTTTCA

CGGTCAGGAGACGGAGCCAGCCGAGG----CTTTCAG-T------------TTTTCT-----------------------

-CCCTTAG-----TTTTT-------------------TTTTTT--T---T-CCTGCAGTTAATGGGACGTGATGCCTCTG

ACATGCTGCCGGCTCGTTCTGGTTCAGGGAAAACCCTGATTCAAGCATCATGTTTTACAAATTTCCCC--TTTTCTGGTT

--GCCCACGGCACACCATGCCAGAGATGGCTCCTGAGGCCA-CCCTAGCCCAGGCGGCCAGGGTTGTT-GGGGGAGCATT

GGAGCCACTCGGTGGGGGAATGAGGGCCTGGCGTCAGGCTGCTCACAC---------------TTTTTTTTCCTTCTTTA

TTTTTTTGAGACAAGG------TGTCCCCCTCTGTCGCCCAGGCTGGAGTGTGGTGGCACGAACATGGTTCACTGCAGCC

TCGGCCTCCTGGGCTCAAGCCATCCTCCCACCTCAGCCTCCCGTGTAGCTTGGACCACGGGCATGCACCACCACGCCCAG

-----CTAATTGTTCTTTTA-TTTTTTTGT---AG---TG---GTGCGTG--CACTCTGTTGCCCAGGCTGGTC------

---------TTGAACTCCTGGCCTT-A---ATGATCCTCCCTCCTCAGCCTTCCAAAGTATTGGGATTACAG---GC---

GTGAGCCACTGTGCCCGGCC-----AGGCTGCCCCCTTAATTAATGT------TAACACGTTCGCCGCCACCAGTCTTGC

AGACCTG--CAGCTGGCCCAGGACCCTTCCACGTGGGCTTGGGTC-------TGAGGGTTCGAGGTCGCTGTCCTCCGTC

CTATTGCGG-GACACCCCCT-CACCACCACTCCCAGCTCCCTGCTGACCTGT--CCCC------------------TCCT

TTGCAGACCTGCCTCCCGGATACCTGCGCCCCGTGGCTGGCCTGGGCTTCTCC------CTACCCTCAGACGTGCACTCT

TCTAACCTCGAGGACCCTGAAACTATGCAAACCGCCACCCTGGGGGCCCAGCCTGAGCCCACAAGGACATTCCTGCCTGG

GGAGCCACCTCCCTGCAGCCCCAGGAGCCTGGAGGAG---CCCGGGCTGCTCTCAGGGGCCAGGGAGGCCACCCAGGACC

TT

>Cercopithecus_neglectus

CTGTTTGATTCTGTCTGAATGGGGCT--GAGTTCACACTGGAAAC-CGTGTGGCGAACAT-AAAACCCGTCCTAGTTTCA

CGGTCAGGAGACAGAGCCAGCAGAGG----CTTTCAG-T------------TTTTCT-----------------------

-CCCTTAG-----TTTTT-------------------TTTTTT----TTT-CCTGCAGTTAATGGGACGTGATGCCTCTG

ACATGCTGCCGGCTCGTTCTGGTTCAGGGAAAACCCTGATTCAAGCATCATGTTTTACAAATTTCCCC--TTTTCTGGTT

--GCCCACAGCACACCATGCCAGAGATGGCTCCTGAGGCCA-CCCCAGCCCAGGCGGCCAGGGTTGTT-GGGGGAGCGTT

AGAGCCACTCGGCGGGGGAATGAGGGGCTGGCCTCAGGCTGCTCACACT--------------TTTTTTTTTTTTCTTTA

TTTTTTTGAGACAGGG------TGTCTCCCTCTGTCGCCCAGGCTGGAGTGTGGTGGCACGAACATGGTTCACTGCAGCC

TCGGCCTCCTGGGCTCAAGCCATCCTCCCACCTCAGCCTCCTGTGTAGCTTGGACCACGGGCATGCACCACCACGCTCAG

-----CTAATTGTTCTTTTA-TTTTTTTGT---AG---TG---GTACGTG--CACTCTGTTGCCCAGGCTGGTC------

---------TTGAACTCCTGGCCTT-A---ATGATCCTCCCTCCTCAGCCTTCCAAAGTATTGGGATTACAG---GC---

GTGAGCCACTGTGCCTGGCC-----AGGCTGCCCCCTTAATTAACGT------TAACACTTTCCCCGCCAGCAGTCTTGC

AGACCCG--CAGCTAGCCCAGGACCCTTCCGCATGGGCTTGGGTC-------TGAGGGTTCGAGGTCACTGTCCTCCGTC

CTGTCACAG-GACACCCCCT-CACCACCACTCCCAGCTCCCTGCTGACCTGT--CCCC------------------TCCT

TTGCAGACCTGCCTCCCGGATACCTGCGCCCCGTGGCTGGTCTGGGCTTCTCC------CTACCCTCAGACGTGCACTCT

TCTAACCTCGAGGACCCTGAAACTATGCAAACCGCCACCCTGGGGGCCCAGCCTGAGCCCACAAGGACATTCCTGCCTGG

GGAGCCACCTCCCTGCAGCCCCAGGAGCCTGGAGGAG---CCTGGGCTGCTCTCAAGGGCCAGGGAGGCCACCCAGGACC

TT

>Chlorocebus_sabaeus

CTATTTGATTCTGTCTGAATGGGGCT--GAGTTCACACTGGAAAC-TGTGTGGCGAACAT-AAAACCCGTCCTAGTTTCA

CGGTCAGGAGACGGAGCCAGCAGAGG----CTTTCAG-T------------TTTTCT-----------------------

-CCCTTAG-----TTTTT-------------------TTTTTT--TCTTT-CCTGCAGTTAATGGGACGTGATGCCTCTG

ACATGCTGCCGGCTCGTTCTGGTTCAGGGAAAACCCTGATTCAAGCATCATGTTTTACAAATTTCCCC--TTTTCTGGTT

--GCCCACAGCACAGCATGCCAGAGATGGCTCCTGAGGCCA-CCCCAGCCCAGGCGGCCAGGATTGTT-GGGGGAGCGTT

AGAGCCACTCGGCAGGGGAATGAGGGGCTGGCCTCAGGCTGCTCACAC---------------TTTTTTTTTTTCCTTTA

TTTTTTTGAGACAGGG------TGTCTCCCTCTGTCGCCCAGGCTGGAGTGTGGTGGCACGAACATGGTTCACTGCAGCC

TCGGCCTCCTGGGCTCAAGCCATCCTCCCACCTCAGCGTCCTGTGTAGCTTGGACCACGGGCATGCACCACCACGCCCAG

-----CTAATTGTTGTTTTA-TTTTTTTGT---AG---TG---GTTCGTG--CACTCTGTTGCCCAGGCTAGTC------

---------TTGAACTCCTGGCCTT-A---ATGATCCTCCCTCCTCAGCCTTCCAAAGTATTGGGATTACAG---GC---

GTGAGCCACTGTGCCCGGCC-----AGGCTGCCCCCTTAATTAACGT------TAACACTTTCCCCGCCACCAGTCTTGC

AGACCTG--CAGCTAGCCCAGGACCCTTCCACATGGGCTTGGGTC-------TGAGGGTTCGAGGTCACTGTCCTCCGTC

CTGTCGCAG-GACACCCCCT-CACCACCACTCCCAGCTCCCTGCTGACCTGT--CCCC------------------TCCT

TTGCAGACCTGCCTCCCGGATACCTGCGCCCCGTGGCTGGCCTGGGCTTCTCC------CTACCCTCAGACGTGCACTCT

TCTGACCTCGAGGACCCTGAAACTATGCAAACCGCCACCCTGGGGGCCCAGCCTGAGCCCACAAGGACATTCCTGCCTGG

GGAGCCACCTTCCTGCAGCCCCAGGAGCCTGGAGGAG---CCCGGGCTGCTCTCAGGGGCCAGGGAGGCCACCCAGGACC

TT

>Erythrocebus_patas

CTATTTGATTCTGTCTGAATGGGGCT--GAGTTCACACTGGAAAC-TGTGTGGCGAACAT-AAAACCCGTCCTAGTTTCA

CGGTCAGGAGACGGAGCCAGCAGAGG----CTTTCAG-T------------TTTTCT-----------------------

-CCCTTAG-----TTTTT-------------------TTTTTT--TTTTT-CCTGCAGTTAATGGGACGTGATGCCTCTG

ACATGCTGCTGGCTCGTTCTGGTTCAGGGAAAACCCTGATTCAAGCATCATGTTTTACAAATTTCCCC--TTTTCTGGTT

--GCCCACAGCACACCATGCCAGAGATGGCTCCTGAGGCCA-CCCCAGCCCAGGCGGCCACGGTTGTT-GGGGGAGCGTT

AGAGCCACTCGGCGGGGGAATGAGGGGCTGGCCTCAGGCTGCTCACAC---------------TTTTTTTTTTT-CTTTA

TTTTTTTGAGACAGGG------TGTCTCCCTCTGTCGCCCAGGCTGGAGTGTGGTGGCACGAACATGGTTCACTGCAGCC

TCGGCCTCCTGGGCTCAAGCCATCCTCTCACCTCAGCCTCCTGTGTAGCTTGGACCACGGGCATGCACCACCACGCCCAG

-----CTAATTGTTCTTTTA-TTTTTTTGT---AG---TG---GTTCGTG--CATTCTGTTGCCCAGGCTGGTC------

---------TTGAACTCCTGGCCTT-A---ATGATCCTCCCTCCTCAGCCTTCCAAAGTATTGGGATTACAG---GC---

GTGAGCCACTGTGCCCGGCC-----AGGCTGCCCCCTTAATTAACGT------TAACACTTTCCCCGCCACCAGTCTTGC

AGACCTG--CAGCTAGCCCAGGACCCTTCCGCATGGGCTTGGGTC-------TGAGGGTTCGAGGTCACTGTCCTCCGTC

CTGTCACAG-GACACCCCCT-CACCACCACTCCCAGCTCTCTGCTGACCTGT--CCCC------------------TCCT

TTGCAGACCTGCCTCCCGGATACCTGCGCCCCGTGGCTGGCCTGGGCTTCTCC------CTATCCTCAGACGTGCACTCT

TCTAACCTCGAGGACCCTGAAACTATGCAAACCGCCACCCTGGGGGCCCAGCCTGAGCCCACAAGGACATTCCTGCCTGG

GGAGCCACCTCCCTGCAGCCCCAGGGGCCTGGAGGAG---CCCGGGCTGCTCTCAGGGGCCAGGGAGGCCACCCAGGACC

TT

>Macaca_fascicularis

CTGTTTGATTCTGTCTGAATGGGGCT--GAGTTCACACTGGAAAC-CGTGTGGCGAACAT-AAAACCCGTCCTAGTTTCA

CGGTCAGGAGACGGAGCCAGCCGAGG----CTTTCAG-T------------TTTTCT-----------------------

-CCCTTAG-------TTT-------------------TTTTTT--TTT-T-CCTGCAGTTAATGGGACGTGATGCCTCTG

ACGT-------GCTCGTTCTGGTTCAGGGAAAACCCTGATTCAAGCATCACGTTTTACAAATTTCCCC--TTTTCTGGTT

--GCCCACGGCACACCATGCCAGCGATGGCTCCTGAGGCCA-CCCTAGCCCAGGCGGCCAGGGTTGTT-GGGGGAGCATT

AGAGCCACTCGGTGGGGGAATGAGGGCCTGGCGTCAGGCTGCTCACAC---------------TTTTTTTTTCTTCTTTA

TTTTTTTGAGACAAGG------TGTCCCCCTCTGTCCCCCAGGCTGGAGTGTGGTGGCACGAACATGGTTCACTGCAGCC

TCGGCCTCCTGGGCTCAAGCCATCCTCCCACCTCAGCCTCCCGTGTAGCTTGGACCACGGGCATGCACCACCACGCCCAG

-----CTAATTGTTCTTTTA-TTTTTTTGT---AG---TG---GTGCGTG--CACTCTGTTGCCCAGGCTGGTC------

---------TTGAACTCCTGGCCTT-A---ATGATCCTCCCTCCTCAGCCTTCCAAAGTATTGGGATTACAG---GC---

GTGAGCCACTGTGCCCGGCC-----AGGCTGCCCCCTTAATTAACGT------TAACACTTTCGCCGCCACCAGTCTTGC

AGACCTG--CAGCTAGCCCGGGACCCTTCCGCATGGGCTTGGGTC-------TGAGGGTTCGAGGTCGCTGTCCTCCGTC

CTATTGCAG-GACACCCCCT-CACCACCACTCCCAGCTCCCTGCTGACCTGT--CCCC------------------TCCT

TTGCAGACCTGCCTCCCGGATACCTGCGCCCCGTGGCTGGCCTGGGCTTCTCC------CTACCCTCAGACGTGCACTCT

TCTAACCTCGAGGACCCTGAAACTATGCAAACCGCCACCCTGGGGGCCCAGCCTGAGCCCACAAGGACATTCCTGCCTGG

GGAGCCACCTCCCTGCAGCCCCAGGAGCCTGGAGGAG---CCCGGGCTGCTCTCAGGGGCCAGGGAGGCCACCCAGGACC

TT

>Mandrillus_leucophaeus

TTGTTTGATTCTGTCTGAATGGGGCT--GAGTTCACACTGGAAAC-CGTGTGGCGAACAT-AAAACCCGTCCTAGTTTCA

CGGTCAGGAGACGGAGCCAGCTGAGG----CTTTCAG-T------------TTTTCT-----------------------

-CCCTTAG-----TTTTT-------------------TTTTTT--TTTCC-CCTGCAGTTAATGGGACGTGATCCCTCTG

ACATGCTGCCGGCTCGTTCTGGTTCAGGGAAAACCCTGATTCAAGCATCATGTTTTACAAATTTCCCC--TTTTCTGGTT

--GCCCACGGCACACCATGCCAGAGATGGCTCCTGAGGCCA-CCCTAGCCCAGGCGGCCAGGGTTGTT-GGGGGAGCATT

AGAGCCACTCGGTGGGGGAATGAGGGCCTGGCGTCAGGCTGCTCACAC---------------TTTTTTTTTCTTCTTTA

TTTTTTTGAGACAAGG------TGTCCCCCTCTGTCGCCCAGGCTGGAGTGTGGTGGCACGAACATGGTTCACTGCAGCC

TCGGCCTCCTGGGCTCAAGCCATCCTCCCACCTCAGCCTCCCGTGTAGCTTGGACCACGGGCATGCACCACCACGCTCAG

-----CTAATTGTTCTTTTA-TTTTTTTGT---AG---TG---GTGCGTG--CACTCTGTTGCCCAGGCTGGTC------

---------TTGAACTCCTGGCCTT-A---ATGATCCTCCCTCCTCAGCCTTCCAAAGTATTGGGATTACAG---GC---

GTGAGCCACTGTGCCCGGCC-----AGGCTGCCCCCTTAATTAACGT------TAACACGTTCGCCGCCACCAGTCTTGC

AGACCTG--CAGCTAGCCCAGGACCCTTCCACATGAGCTTGGGTC-------TGAGGGTTCGAGGTCGCTGTCCTCCGTC

CTATTGCAG-GACACCCCCT-CACCACCACTCCCAGCTCCCTGCTGACCTGT--CCTC------------------TCCT

TTGCAGACCTGCCTCCCGGATACCTGCGCCCCGTGGCTGGCCTGGGCTTCTCC------CTACCCTCAGACGTGCACTCT

TCTAACCTCGAGGACCCTGAAACTATGCAAACCGCCACCCTGGGGGCCCAGCCTGAGCCCACAAGGACATTCCTGCCTGG

GGAGCCACCTCCCTGCAGCCCCAGGAGCCTGGAGGAG---CCCGGGCTGCTCTCAGGGGCCAGGGAGGCCACCCAGGACC

TT

>Macaca_nemestrina

CTGTTTGATTCTGTCTGAATGGGGCT--GAGTTCACACTGGAAAC-CGTGTGGCGAACAT-AAAACCCGTCCTAGTTTCA

TGGTCAGGAGACGGAGCCAGCCGAGG----CTTTCAG-T------------TTTTCT-----------------------

-CCCTTAG-----TTTTT-------------------TTTTTT--TTT-T-CCTGCAGTTAATGGGACGTGATGCCTCTG

ACATGCTGCCGGCTCGTTCTGGTTCAGGGAAAACCCTGATTCAAGCATCATGTTTTACAAATTTCCCC--TTTTCTGGTT

--GCCCACGGCACACCATGCCAGAGATGGCTCCTGAGGCCA-CCCTAGCCCAGGCGGCCAGGGTTGTT-GGGGGAGCATT

AGAGCCACTCGGTGGGGGAATGAGGGCCTGGCGTCAGGCTGCTCACAC---------------TTTTTTTTTCTTCTTTA

TTTTTTTGAGACAAGG------TGTCCCCCTCTGTCCCCCAGGCTGGAGTGTGGTGGCACGAACATGGTTCACTGCAGCC

TCGGCCTCCTGGGCTCAAGCCATCCTCCCACCTCAGCCTCCCGTGTAGCTTGGACCACGGGCATGCACCACCACGCCCAG

-----CTAATTGTTCTTTTA-TTTTTTTGT---AG---TG---GTGCGTG--CACTCTGTTGCCCAGGCTGGTC------

---------TTGAACTCCTGGCCTT-A---ATGATCCTCCCTCCTCAGCCTTCCAAAGTATTGGGATTACAG---GC---

GTGAGCCACTGTGCCCGGCC-----AGGCTGCCCCCTTAATTAACGT------TAACACTTTCGCCGCCACCAGTCTTGC

AGACCTG--CAGCTAGCCCGGGACCCTTCCACATGGGCTTGGGTC-------TGAGGGTTCGAGGTCGCTGTCCTCCGTC

CTATTGCAG-GACACCCCCT-CACCACCACTCCCAGCTCCCTGCTGACCTGT--CCCC------------------TCCT

TTGCAGACCTGCCTCCCGGATACCTGCGCCCCGTGGCTGGCCTGGGCTTCTCC------CTACCCTCAGACGTGCACTCT

TCTAACCTCGAGGACCCTGAAACTATGCAAACCGCCACCCTGGGGGCCCAGCCTGAGCCCACAAGGACATTCCTGCCTGG

GGAGCCACCTCCCTGCAGCCCCAGGAGCCTGGAGGAG---CCCGGGCTGCTCTCAGGGGCCAGGGAGGCCACCCAGGACC

TT

>Nasalis_larvatus

CTATTTGATTCTGTCTGAATGGGGCTGAGAGTTCACAC--GAAAC-CGTGTGGCGAACAT-AAAACCCGGCCTAGTTTCA

TGGTCAGGAGACGGAGCCAGCAGAGGG--TTTTTCAG-T------------TTTTCT-----------------------

-CCCTTAG------------------------------TTTTT--TTTTT-TCTGCAGTTAATGGGATGTGATGCCTCTG

ACATGCTGCCGGCTCGTTCTGGTTCAGGGAAAACCCTGATTCAAGCATCATGTTTTACAAATTTCCCC--TTTTCTGGTT

--ACCCACAGCACACCATGCCAGAGATGGCTCCTGAGGCCA-CCCCAGCCCGGGCGGCCAGGGTTGTT-GGGGGAACATT

AGAGCCACTCGGCGGGGGACTGAGGGCCTGGCCTCAGGCTGCTCACAC----------------TTTTTTTTTTTCTTTA

TTTTTTTGAGACAGGG------TGTCTCCCTCTGTCGCCCAGGCTGGAGTGTAGTGGCGCGAACATGGTTCACTGCAGCC

TCGGCCTCCTGGGCTCAAGCCATCCTCCCACCTCAGCCTCCCGTGTAGCTTGGACCACGGGCATGCACCACCACGCCCAG

-----CTAATTGTTCTTTTG-TTTTTTTGT---AG---TG---GTGCGTG--CACTCTGTTACCCAGGCTGGTC------

---------TTGAACTCCTGGCCTT-A---ACGATCCTCTCTCCTCAGCCTTCCAAAGTATTGGGGTTACAG---GC---

GTGAGCCACTGTGCCCAGCC-----AGGCTGCCCCCTTAATTAACGT------TAACACTTTCCCCGCCACCAGTCTTGC

AGACCTG--CAGCTAGCCCAGGACCCTTCTGCATGGGCTTGGGTC-------TGAGGGTTCAAGGTCACTGTCCTCCGTC

CTATCGCAG-GACACCCCCT-CACCACCACTCCCAGCTCCCTGCTGACCTGT--CCCC------------------TCCT

TTGCAGACCTGCCTCCCGGATACCTGCGCCCCGTGGCTGGCCTGGGCTTCTCC------CTACCTTCAGACGTGCACTCT

TCTAACCTCGAGGACCCTGAAACTATGCAAACCGCCACCCTGGGGGCCCAGCCTGAGCCCACAAGGACATTCCTGCCTGG

GGAGCCACCTCCCTGCAGCCCTAGGAGCCTGGAGGAG---CCCAGGCTGCTCTCAGGGGCCAAGGAGGCCACCCAGGACC

TT

>Papio_anubis

CTGTTTGATTCTGTCTGAATGGGGCT--GAGTTCACACTGGAAAC-CGTGTGGCGAACGT-AAAACCCGTCCTAGTTTCA

CGGTCAGGAGACGCAGCCAGCCGAGG----CTCTCAG-T------------TTTTCT-----------------------

-CCCTTAG-----TTTTT-------------------TTTTTT--TTT---CCTGCAGTTAATGGGACGTGATGCCTCTG

ACATGCTGCCGGCTCGTTCTGGTTCAGGGAAAACCCTGATTCAAGCATCATGTTTTACAAATTTCCCC--TTTTCTGGCT

--GCCCACGGCACACCATGCCAGAGATGGCTCCTGAGGCCA-CCCTAGCCCAGGCGGCCAGGGTTGTT--GGGGAGCATT

AGAGCCACTCGGTGGGGGAATGAGGGCCTGGCGTCAGGCTGCTCACAC---------------TTTTTTTTTCTTCTTTA

TTTTTTTGAGACAAGG------TGTCCCCCTCTGTCGCCCAGGCTGGAGTGTGGTGGCACGAACATGGTTCACTGCAGCC

TCGGCCTCCTGGGCTCAAGCCATCCTCCCACCTCAGCCTCCCGTGTAGCTTGGACCACGGGCATGCACCACCGCGCCCAG

-----CTAATTGTTCTTTTA-TTTTTTTGT---AG---TG---GTGCGTG--CACTCTGTTGCCCAGGCTGGTC------

---------TTGAACTCCTGGCCTT-A---ATGATCCTCCCTCCTCAGCCTTCCAAAGTATTGGGATTACAG---GC---

GTGAGCCACTGTGCCCGGCC-----AGGCTGCCCCCTTAATTAACGT------TAACACGTTCGCCGCCACCAGTCTTGC

AGACCTG--CAGCTGGCCCAGGACCCTTCTGCATGGGCTTGGGTC-------TGAGGGTTCGAGGTCGCTGTCCTCCGTC

CTGTCGCAG-GACACCCCCT-CACCGCCACTCCCAGCTCCCTGCTGACCTGT--CCCC------------------TCCT

TTGCAGACCTGCCTCCCGGATATCTGCGCCCCGTGGCTGGCCTGGGCTTCTCC------CTACCCTCAGACGTGCACTCT

TCTAACCTCGAGGACCCTGAAACTATGCAAACCGCCACCCTGGGGGCCCAGCCTGAGCCCACAAGGACATTCCTGCCTGG

GGAGCCACCTCCCTGCAGCCCCAGGAGCCTGGAGGAG---CCCGGGCTGCTCTCAGGGGCCAGGGAGGCCACCCAGGACC

TT

>Pygathrix_nemaeus

CTATTTGATTGTGTCTGAATGGGGCTGAGAGTTCACACTGGAAAC-CGTGTGGCGAACAT-AAAACCCGGCCTAGTTTCA

TGGTCAGGAGACGGAGCCAGCAGAGGG--TTTTTCAG-T------------TTTTCT-----------------------

-CCCTTAG-----------------------------TTTTTT--TTTTT-TCTGCAGTTAATGGGACGTGATGCCTCTG

ACATGCTGCCGGCTCGTTCTGGTTCAGGGAAAACCCTGATTCAAGCATCATGTTTTACAAATTTCCCC--TTTTCTGGTT

--ACCCACAGCACACCATGCCAGAGATGGCTCCTGAGGCCA-CCCCAGCCCGGGCGGCCAGGGTTGTT-GGGGGAACATT

AGAGCCACTCAGCGGGGGAATGAGGGCCTGGCCTCAGGCTGCTCACAC---------------TTTTTTTTTTTTCTTAA

TTTTTTTGAGACAGGG------TGTCTCCCTCTGTCGCCCAGGCTGGAGTGTAGTGGCGCAAACATGGTTCACTGCAGCC

TCGGCCTCCTGGGCTCAAGCCATCCTCCCACCTCAGCCTCCCGTGTAGCTTGGATCACGGGCATGCACCACCACGCCCAG

-----CTAATTGTTATTCTC-TTTTTTTGT---AG---TG---GTGCGTG--CACTCTGTTACCCAGGCTGGTC------

---------TTGAACTCCTGGCCTT-A---ATGATCCTCCCTCCTCAGCCTTCCAAAGTATTGGGGTTACAG---GC---

GTGAGCCACTGTGCCCAGCC-----AGGCTGCCCCCTTAATTAACGT------TAACACTTTCCCCGCCACCAGTCTTGC

AGACCTG--CAGCTAGCCCAGGACCCTTCTGCATGGGCTTGGGTC-------TGAGGGTTCGAGGTCACTGTCCTCTGTC

CTATCGCAG-GACACCCCCT-CACCACCACTCCCAGCTCCCTGCTGACCTGT--CCCC------------------TCCT

TTGCAGACCTGCCTCCCGGATACCTGCGCCCTGTGGCTGGCCTGGGCTTCTCC------CTACCTTCAGACGTGCACTCT

TCTAACCTCGAGGACCCTGAAACTATGCAAACCGCCACCCTGGGGGCCCAGCCTGAGCCCACAAGGACATTCCTGCCTGG

GGAGCCACCTCCCTGCAGCCCTAGGAGCCTGGAGGAG---CCCGGGCTGCTCTCAGGGGCCAGGGAGGCCACCCAGGACC

TT

>Piliocolobus_tephrosceles

CTATTTGACTCTGTCTGAATGGGGCTGAGAGTTCACACTGGAAAC-CGTGTGGCGAACAT-AAAACCCGGCCTAGTTTCA

CGGTCAGGAGACGGAGCCAGCAGAGGG--TTTTTCAG-T------------TTTTCT-----------------------

-CCCTTAGTTGTTTTTTTTT-----------------TTTTTT--TTTTTTCCTGCAGTTAATGGGACGTGATGCCTCTG

ACATGCTGCCGGCTCGTTCTGGTTCAGGGAAAACCCTGATTCAATCATCATGTTTTACAAATTTCCCC--TTTTCTGGTT

--ACCCACAGCACACCATGCCAGAGATGGCTCCTGAGGCCA-CCCCAGCCCGGGTGGCCAGGGTTGTT-GGGGGAACATT

AGAGCCACTCGGCGGGGGAATGTGGGCCTGGCCTCAGGCTGCTTACAC------------------TTTTTTTTTCTTTA

TTTTTTTGAGACAGGG------TGTCTCCCTCTGTCGCCCAGGCTGGAGTGTGGTGGCGCGAGCATGGTTCACTGCAGCC

TCGGCCTCCTGGGCTCAAGCCATCCTCCCACCTCAGCCTCCCGTGTAGCTTGGACCACAGGCATACACCACCACGCCCAG

-----CTAATTGTTCTTTTA-TTTTTTTGT---AG---TG---GTGCGTG--CACTCTGTTGCCCAGGCTGGTC------

---------TTGAACTCCTGGCCTT-A---ATGATCCTCCCTCCTCAGACTTCCAAAGTATTGGGGTTACAG---GC---

GTGAGCCACTGTGCCCAGCC-----AGGCTGCCCCCTTAATTAACGT------TAACACTTTACCTGCCACCAGTCTTGC

AGACCTG--CAGCTAGCCCAGGACCCTTCCGCATGGGCTTGGGTC-------TGAGGGTTCGAGGTCACTGTCCTCCGTC

CTATCGCAG-GACACCCCCT-CACCACCACTCCCAGCTCCCTGCTGACCTGT--CCCC------------------TCCT

TTGCAGACCTGCCTCCCGGATACCTGCGTCCCGTGGCTGGCCTGGGCTTCTCC------CTACCTTCAGACGTGCACTCT

TCTAACCTCGAGGACCCTGAAACTATGCAAACCGCCACCCTGGGGGCCCAGCCTGAGCCCACAAGGACATTCCTGCCTGA

GGAGCCACCTCCCTGCAGCCCTAGGAGCCTGGAGGAG---CCCGGGCTGCTCTCAGGGGCCAGGGAGGCCACCCAGGACC

TT

>Macaca_mulatta

CTGTTTGATTCTGTCTGAATGGGGCT--GAGTTCACACTGGAAAC-CGTGTGGCGAACATAAAAACCCGTCCTAGTTTCA

C-GTCAGGAGACGGAGCCAGCCGAGG----CTTTCAGTT------------TTTTCT-----------------------

-CCCTTAG-----TTTTT-------------------TTTTTT--TTTTTCCCTGCAGTTAATGGGACGTGATGCCTCTG

ACGT-------GCTCGTTCTGGTTCAGGGAAAACCCTGATTCAAGCATCATGTTTTACAAATTTCCCC--TTTTCTGGTT

--GCCCACGGCACACCATGCCAGAGATGGCTCCTGAGGCCA-CCCTAGCCCAGGCGGCCAGGGTTGTT-GGGGGAGCATT

AGAGCCACTCGGTGGGGGAATGAGGGCCTGGCGTCAGGCTGCTCACGC---------------TTTTTTTTTCTTCTTTA

TTTTTTTGAGACAAGG------TGTCCCCCTCTGTCCCCCAGGCTGGAGTGTGGTGGCACGAACATGGTTCACTGCAGCC

TCGGCCTCCTGGGCTCAAGCCATCCTCCCACCTCAGCCTCCCGTGTAGCTTGGACCACGGGCATGCACCACCACGCCCAG

-----CTAATTGTTCTTTTA-TTTTTTTGT---AG---TG---GTGCGTG--CACTCTGTTGCCCAGGCTGGTC------

---------TTGAACTCCTGGCCTT-A---ATGATCCTCCCTCCTCAGCCTTCCAAAGTATTGGGATTACAG---GC---

GTGAGCCACTGTGCCCGGCC-----AGGCTGCCCCCTTAATTAACGT------TAACACTTTCGCCGCCACCAGTCTTGC

AGACCTG--CAGCTAGCCCGGAACCCTTCCGCATGGGCTTGGGTC-------TGAGGGTTCGAGGTCGCTGTCCTCCGTC

CTATTGCAG-GACACCCCCT-CACCACCACTCCCAGCTCCCTGCTGACCTGT--CCCC------------------TCCT

TTGCAGACCTGCCTCCCGGATACCTGCGCCCCGTGGCTGGCCTGGGCTTCTCC------CTACCCTCAGACGTGCACTCT

TCTAACCTCGAGGACCCTGAAACTATGCAAACCGCCACCCTGGGGGCCCAGCCTGAGCCCACAAGGACATTCCTGCCTGG

GGAGCCACCTCCCTGCAGCCCCAGGAGCCTGGAGGAG---CCCGGGCTGCTCTCAGGGGCCAGGGAGGCCACCCAGGACC

TT

>Rhinopithecus_roxellana

CTATTTGATTCTGTCTGAATGGGGCTGAGAGTTCACACTGGAAAC-CGTGTGGCGAACAT-AAAACCCGGCCTAGTTTCA

TGGTCAGGAGACGGAGCCAGCAGAGGG--TTTTTCAG-T------------TTTTCT-----------------------

-CCCTTAG-----------------------------TTTTTT--TTTTT-TCTGCAGTTAATGGGACGTGATGCCTCTG

ACATGCTGCCGGCTCGTTCTGGTTCAGGGAAAACCCTGATTCAAGCATCATGTTTTACAAATTTCCCC--TTTTCTGGTT

--ACCCACAGCACACCATGCCAGAGATGGCTCCTGAGGCCA-CCCCAGCCCGGGCGGCCAGGGTTGTT-GGGGGAACATT

AGAGCCACTTGGCGGGGGAATGAGGGCCTGGCCTCAGGCTGCTCACAC---------------TTTTTTTTTTTTCTTTA

TTTTTTTGAGACAGGG------TGTCTCCCTCTGTCGCCCAGGCTGGAGTGTGGTGGCGCGAACATGGTTCACTGCAGCC

TCGGCCTCCTGGGCTCAAGCCATCCTCCCACCTCAGCCTCCCGTGTAGCTTGGACCACGGGCATGCACCACCACGCCCAG

-----CTAATTGTTCTTTTG-TTTTTTTGT---AG---TG---GTGCGTG--CACTCTGTTACCCAGGCTGGTC------

---------TTGAACTCCTGGCCTT-A---ATGATTCTCCCTCCTCAGCCTTCCAAAGTATTGGGGTTACAG---GC---

GTGAGCCACTGTGCCCAGCC-----AGGCTGCCCCCTTAATTAACGT------TAACACTTTCCCCGCCACCAGTCTTGC

AGACCTG--CAGCTAGCCCAGGACCCTTCTGCATGGGCTTGGGTC-------TGAGGGTTCAAGGTCACTGTCCTCTGTC

CTATCGCAG-GACACCCCCT-CACCACCACTCCCAGCTCCCTGCTGACCTGT--CCCC------------------TCCT

TTGCAGACCTGCCTCCCGGATACTTGCGCCCCGTGGCTGGCCTGGGCTTCTCC------CTACCTTCAGACGTGCACTCT

TCTAACCTCGAGGACCCTGAAACTATGCAAACCGCCACCCTGGGGGCCCAGCCTGAGCCCACAAGGACATTCCTGCCTGG

GGAGCCACCTCCCTGCAGCCCTAGGAGCCTGGAGGAG---CCCGGGCTGCTCTCAGGGGCCAGGGAGGCCACCCAGGACC

TT

>Semnopithecus_entellus

CTATTTGATTCTGTCTGAATGGGGCTGAGAGTTCACACTGGAAAC-CGTGTGGCGAACAT-GAAACCCGGCCTAGTTTCA

TGGTCAGGAGACGGAGCCAGCAGAGGG--TTTTTCAG-T------------TTTTCT-----------------------

-CCCTTAGTTTTTTTTTT-------------------TTTTTT--TTTTT-TCTGCAGTTAATGGGACGTGATGCCTCTG

ACATGCTGCCGGCACGTTCTGGTTCAGGGAAAACCCTGATTCAAGCATCATGTTTTACAAATTTCCCC--TTTTCTGGTT

--ACCCACAGCACACCATGCCAGAGATGGCTCCTGAGGCCA-CCCCAGCCCGGGCGGCCAGGGTTGTT-GGGGGAACATT

AGAGCCACTCGGCAGGGGAATGAGGGCCTGGCCTCAGGCTGCTCACAC---------------TTTTTTTTTTTTCTTTA

TTTTTTTGAGACAGGG------TGTCTCCCTCTGTCGCCCAGGCTGGAGTGTAGTGGCACGAACATGGTTCACTGCAGCC

TCGGCCTCCTGGGCTCAAGCCATCCTCCCACCTCAGCCTCCCGTGTAGCTTGGACCACGGGCATGCACCACCACGCCCAG

-----CTAATTGTTCTTTTG-TTTTTTTGT---AG---TG---GTGCGTG--CACTCTGTTACCCAGGCTGGTC------

---------TTGAACTCCTGGCCTT-A---ATGATCCTCCTTCCTCAGCCTTCCAAAGTATTGGGGTTACAG---GC---

GTGAGCCACTGTGCCCAGCC-----AGGCTGCCCCCTTAGTTAACGT------TAACACTTTCCCCGCCACCAGTCTCGC

AGACCTG--CAGCTAGCCCAGGACCCTTCTGCATGGGCTTGGGTC-------TGAGGGTTCAAGGTCACTGTCCTCCATC

CTATCGCAG-GACACCCCCT-CACCACCACTCCCAGCTCCCTGCTGACCCGT--CCCC------------------TCCT

TTGCAGACCTGCCTCCCGGATACCTGCGCCCCGTGGCTGGTCTGGGCTTCTCC------CTACCTTCAGACGTGCACTCT

TCTCACCTCCAGGACCCTGAAACTATGCAAACCGCCACCCTGCGGGCCCAGCCTGAGCCCACAAGGACATTCCTGCCTGG

GGAGCCACCTCCCTGCAGCCCTAGGAGCCTGGAGGAG---CCCGGGCTGCTCTCAGGGGCCAGGGAGGCCACCCAGGACC

TT

>Theropithecus_gelada

CTGTTTGATTCTGTCTGAATGGGGCT--GAGTTCACACTGGAAAC-CGTGTGGCGAACAT-AAAACCCGTCCTAGTTTCA

CGGTCAGGAGACGGAGCCAGCCGAGG----CTTTCAG-T------------TTTTCT-----------------------

-CCCTTAG-----TTTTT-------------------TTTTTT--TTC-C-CCTGCAGTTAATGGGACGTGATGCCTCTG

ACATGCTGCCGGCTCGTTCTGGTTCAGGGAAAACCCTGATTCAAGCATCATGTTTTACAAATTTCCCC--TTTTCTGGCT

--GCCCACGGCACACCATGCCAGAGATGGCTCCTGAGGCCA-CCCTAGCCCAGGCGGCCAGGGTTGTT--GGGGAGCATT

AGAGCCACTCGGTGGGGGAATGAGGGCCTGGCGTCAGGCTGCTCACAC---------------TTTTTTTTTCTTCTTTA

TTTTTTTGAGACAAGG------TGTCCCCCTCTGTCGCCCAGGCTGGAGTGTGGTGGCACGAACATGGTTCACTGCAGCC

TCGGCCTCCTGGGCTCAAGCCATCCTCCCACCTCAGCCTCCCGTGTAGCTTGGACCACGGGCATGCACCACCGCGCCCAG

-----CTAATTGTTCTTTTA-TTTTTTTGT---AG---TG---GTGCGTG--CACTCTGTTGCCCAGGCTGGTC------

---------TTGAACTCCTGGCCTT-A---ATGATCCTCCCTCCTCAGCCTTCCAAAGTATTGGGATTACAG---GC---

ATGAGCCACTGTGCCCGGCC-----AGGCTGCCCCCTTAATTAACGT------TAACACGTTCGCCGCCACCAGTCTTGC

AGACCTG--CAGCTGGCCCAGGACCCTTCTGCATGGGCTTGGGTC-------TGAGGGTTCGAGGTCACTGTCCTCCGTC

CTGTCGCAG-GACACCCCCT-CACCGCCACTCCCAGCTCCCTGCTGACCTGT--CCCC------------------TCCT

TTGCAGACCTGCCTCCCGGATACCTGCGCCCCGTGGCTGGCCTGGGCTTCTCC------CTACCCTCGGACGTGCACTCT

TCTAACCTCGAGGACCCTGAAACTATGCAAACCGCCACCCTGGGGGCCCAGCCTGAGCCCACAAGGACATTCCTGCCTGG

GGAGCCACCTCCCTGCAGCCCCAGGAGCCTGGAGGAG---CCCGGGCTGCTCTCAGGGGCCAGGGAGGCCACCCAGGACC

TT

>Ateles_geoffroyi

CTGTTTGATTCTTTCTGAATGAGGCTGAGAGTTCACACTGGAAAT-CGTGTGGCCAACAT-AAAACTCGTCCCAGTTTCA

CAGTCAGGAGACAGAGCCAACAGGGGG--TTTTTTAG-T------------TTTTTT-----------------------

-CCCTTAGG-----------------------------TTTTT--TTTT-TTTTACAGCTAATGGGACGTGATGCCTCTG

ACATGCTGCCGGCTCATTCTGGTTCAGGGAAAACCCTGATTCAAGCATCATGCTTTACGAATCCCCCC---TTTCTGGTT

--GCCTACCCCACAGGGTCCCAGAGATGGCCCCTGAGGCCACTCC---CTCAGGTGGCCAGGGTTGTT-GGGGGAGCTTT

AAGGCCACTCTGGTGGGGAAAGAGGACCTGGCGTCAGGCTACTCAC---------------------------ACTTTTT

TTTTTTTGAGAC--AG------GGTCTCCCTTTGTCACCCAGGCTGAAGTGCAGTGGCACAAACACGGTTCACTGCAGCC

T-GTCTTCCTGGGCTCACGCCATCCTCCCACCGCAGCCTCCCGTGTCGCCGGGACCACAGGCGCTCACCGCCATGCCCAG

-----CTCA---TTTTTTAA-TGTTTCTAT---AG---TG---GGGGGTGCTCACTCTGTTGCCCAGGCTGGTCTTGAAC

TCCTGGCCTTTGAACTCCTGGCCTTAA---ATGATTCTCCTGCCTCAGCTTCCCAAAGTATTGGGATTGTGG---AC---

ATGAGCCACTGTACCCAGCC-----AGGCTGCCCCCTTAGTTAACCTAACACTTAACACTTTCCCCACCATCAGTCTTGC

AGGCCTG--CAGCTGGCCCCGGACCCTCCCACATGGGCTTGGGTC-------TGAAGGTCTGAGGCCACTGTTTCTCGTC

CCATCCCAG-GACACCCCCT-CCCCACCACTCCTGGCTCCCTGCTCACCTGT--CCCC------------------TCCT

TTGCAGACCTGCCTCCCGGATACCTGCGCCCCGTGGCCAGCATGAGCTTCTCC------CTACCCTCAGACGTGCACTCT

TCTGACCTCGAGGACCCTGAAACTATGCAAACCGCCGCCCCAGGGGCCCAGCCTGAGCCCACAAGGACATTCCTGCCTGG

GGAGCTGCCTCCCTGCAGCCCCAGGAGCCTGGAGGAG---CCCAGGCTGCTCTCAGGGTCCAGGGAGGCCACCCAGGACC

TT

>Aotus_nancymaae

CTATTTGATTCTTTCTGAATGAGGCTGAGAGTTCATGCTGGAAAC-CATGTGGCCAACAT-AAAACTCGTCCCAGTTTCA

CAGTCAGGAGACGGAGCCAAC--TGGG--TTTTTTAC-T------------TTTTTT-----------------------

-CCCTTAGG-----------------------------TTTTT--TTTC-CTTTGCAGCTAATGGGACGTGATGCCTCTG

ACATGCTGCCGGCTCGTTCTGGTTCAGGGAAAACCCTGATTCAAGCATCATGCTTTGCAAATCCCCCC---TTTCTGGTT

--GCCCACCCCACAGGGTCCCGGAAATATC------------TCC---CTCAGGTGACCAGGGTGGTT-GGGGGAGCTTT

AAGGCCACTCTGGTGGGGAAGGAGGGCCTGGCCTCAAGCTGCTCACAA---------------------TTTTTTTTTTT

TTTTTTTGAGACAG--------GGTCTCCCTTTGTCGCCCAGGCTGAAGTGCAGTGGCACAAACACAGTCCACTGCAGCC

T-GTCTTCCTGGGCTCACACCATCCTCCCACCGCAGCCTCCCGTGTCACCGGGACCACAGGCGCTCACCGCCATGCCCGG

-----CTCATTGTTTTTTAA-CGCTTCTAT---AG---TG---GGGGGTGCTCACTCTGTTGCCCAGGCTGGTC------

---------TTGAACTCCTGGCCTTAAATGATGATTCTCCTGCCTCAGCTTCCCAAAGTATTGGGATTGTGG---GC---

ATGAGCCACTGCACCCAGCC-----AGGCCGCCCCCTTAATTAACCTAACAC-TAACACTTTCACCGCCAGCTGTCTTGC

AGGCCTG--CAGCTGGCCCCAGACCCTCCCGCATGGGCTTGGGTC-------TGAAGGTTCGAGGCCACTGTTCCTCGTC

CCATCCCAG-GACACCCCCT-CCCCACCGCTCCTGGCTCCCTGCTCACCTGT--CCCC------------------TCCT

TTGCAGATCTGCCTCCCGGATACCTGCGCCCCGTGGCCAGCATGGGCTTCTCC------CTACCCTCAGACGTGCACTCT

TCTGACCTCGAGGACCCTGAAACTATGCAAACCGCCGCCCCAGGGGCCCAGCCTGAGCCCACAAGGACATTCCTGCCTGG

GGAGCCACCTCCCTGCAGCCCCAGGAGCCTGGAGGAG---CCCGGGCTGCTCTCAGGGCCCAGGGAGGCCACCCAGGACC

TT

>Alouatta_palliata

CTATTTGATTC--TCTGAATGAGACTGAGTTTTCACACTGGAAAC-CGTGTGGCCAACAT-AAAACTCGTCCCAGTTT--

CAGTCAGGAGACGGAGCCAACAGGGGG--TTTTTTAG-T------------TCTTTT-----------------------

-CCCTTAGG-----------------------------TTTTT--TTTTTCTTTGCAGCTAATGGGACGTGATGCCTCTG

ACATGCTGCCGGCTTGTTCTGGTTCAGGGAAAACCCTGATTCAAGCATCATGCTTTACGAATCCCCCC---TTTCTGGTT

--GCCCACCCCACAGGGTCCCAGAGATGGCTCCTGAGGCCAGTCC---TTCAGGTGGCCAGGGTTGTT-GAGGGAACTTT

AAGGCCACTCTGGTGGGGAAGGAGGGCCTGGCGTCAGGCTGCTCACA---------------------------CTTTTT

TTTTTTTGAGACAGGGTCTCCCGGTCTCCCTTTGTCGCCCAGGCTGAAGTGCAGTGGCACAAACACGGTTCACTGCAGCC

T-GTCTTCCTGGGCTCACGCCATCCTCCCACCGCAGCCTCCTGTGTCACCGGGACCACAGGCACTCACCGCCATGCCCAG

-----CTCATCGTTTTTTAA-TGTTTCTAT---AG---T----GGGGGTGCTCACTC--TTGCCCAGGCTGATC------

---------TTGAACTCCTGGCCTTAA---ATGGTTCTCCTGCCTCAGCTTCCCAAAGTATTGAGATTGTGG---GC---

ATGAGCCACTGTACCCAGCC-----AGGCCGCCCCCTTAATTAGCCTAACAC-TAATACTTTCCCCACCATCAATCTTGC

AGGCCTG--CAGCTGGCCCCGGACCCTCCCACATGGGCTTGGGTC-------TGAAGGTTTGAGGCCGCTGTTCCTCATC

CCATGCCAG-GACACCCCCT-CCCCACCGCTCCTGGTTCCCTGCTTACCTGTCCCCCC------------------TCCT

TTGCAGACCTGCCTCCCGGATACCTGCGCCCCGTGGCCAGCATGGGCTTCTCC------CTACCCTCAGACGTGCACTCT

TCTGACCTCGAGGACCCTGAAACTATGCAAACCGCCACCCCAGGGGCCCAGCCTGAGCCCACAAGGACATTCCTGCCTGG

GGAGCCACCTCCCTGCAGCCCCAGGAGCCTGGAGGAG---CCCGGGCTGCTCTCAGGGCCCAGGGAGGCCACCCAGGACC

TT

>Cebus_albifrons

CTATTTGATTCTCTCTGAATGAGGCTGAGAGTTCACACTGGAAAC-GGTGTGGCCAGCAT-AAAACTCGTCCCAGTTTCA

CAGTCAGGAGACGGGGCCAAC---GGG--TTTTTTAG-G------------TTTTTT-----------------------

-TCCTTAG------------------------------TTTTT--TTTTTCTTTGCAGCTAATGGGACGTGATGCCTCTG

ACATGCTGCCGGCTTGTTCTGGTTCAGGGAAAACCCTGGTTCAAGCATCATACTTTACAAATGC-CCC---TTTCTGGCG

--GCCCACCCCACAGGGTCCCAGAGATAG------------CTCC---CTCA-GTGGCCAGGGTTGTG-GGGGGAGCTTT

AAGGCCACTCTGGTGGGGAAGGAGGGCCTGGCCTCAAGCTGCTCACA---------------------------CTTTTT

TTTTTTTGAGACAG--------GGTCTCCCTTTGTCGCCCAGGCACAAGTGCAGTGGTACAAACACGGCTCACTGCAGTC

T-GTCTTCCTGGGCTCACGCCACCCTCCCACCGCAGCCTCCTGTGTCGCC--GACCACAGGCGCTCACCGCCATGCCCGG

-----CTCGTCATTTTTTAA-TGTTTCTAT---AG---TA---GGGGGTGCTCACTCTGTTGCCCAGGCTGGTC------

---------GTGAACGCCTGGCCTGAA---ATGATTCTCCTGCCTCAGCTTCCCAAAGTATTGGGATTGTGG---GC---

ATGAGCCACTGCACCCAGCC-----AGGCCGCCCCCTCAATTAACCTAATAC-TAACGCTTCCGCCGCCATCAGTCTTAC

AGGCCTG--CAGCTGGCCCCAGACCTTCCTGCATGGGCTTGGGTC-------TGAAGGTTCAAGGCCACCGTTCTTCATC

CCATCCCAG-GACA---CCT-CCCCACTGCTCCTGGCTCCCTGCTCACCTGT--CCCC------------------TCCT

TTGCAGACCTGCCTCCCGGATACCTGCGCCCTGTGGCCAGCATGGGCTTCTCC------CTACCCTCAGACGTGCACTCT

TCTGACCTCGAGGACCCTGAAACTATGCAAACCGCCGCCCCAGGGGCCCAGCCTGAGCCCACAAGGACATTCCTGCCTGG

AGAGCCGCCTCCCTGCAGCCCCAGGAGCCTGGAGGAG---CCCGGGCTGCTCTCAGGGCCCAGGGAGGCCACCCAGGACC

TT

>Cebus_capucinus_imitator

CTATTTGATTCTCTCTGAATGAGGCTGAGAGTTCACACTGGAAAC-GGTGTGGCCAGCAT-AAAACTCGTCCCAGTTTCA

CAGTCAGGAGACGGGGCCAAC---GGG--TTTTTTAG-G------------TTTTTT-----------------------

-TCCTTAG------------------------------TTTTT--TTTTTCTTTGCAGCTAATGGGACGTGATGCCTCTG

ACATGCTGCCGGCTTGTTCTGGTTCAGGGAAAACCCTGGTTCAAGCATCAAACTTTACAAATGC-CCC---TTTCTGGCG

--GCCCACCCCACAGGGTCCCAGAGATAG------------CTCC---CTCA-GTGGCCAGGGTTGTG-GGGGGAGCTTT

AAGGCCACTCTGGTGGGGAAGGAGGGCCTGGCCTCAAGCTGCTCACA---------------------------CTTTTT

TTTTTTTGAGACAG--------GGTCTCCCTTTGTCGCCCAGGCACAAGTGCAGTGGTACAAACACGGCTCACTGCAGTC

T-GTCTTCCTGGGCTCACGCCACCCTCCCACCGCAGCCTCCTGTGTCGCC--GACCACAGGCGCTCACCGCCATGCCCGG

-----CTCGTCGTTTTTTAA-TGTTTCTAT---AG---TA---GGGGGTGCTCACTCTGTTGCCCAGGCTGGTC------

---------GTGAACGCCTGGCCTGAA---ATGATTCTCCTGCCTCAGCTTCCCAAAGTATTGGGATTGTGG---GC---

ATGAGCCACTGCACCCAGCC-----AGGCCGCCCCCTCAATTAACCTAATAC-TAACGCTTCCGCCGCCATCAGTCTTAC

AGGCCTG--CAGCTGGCCCCAGACCTTCCTGCATGGGCTTGGGTC-------TGAAGGTTCAAGGCCACCGTTCTTCATC

CCATCCCAG-GACA---CCT-CCCCACTGCTCCTGGCTCCCTGCTCACCTCT--CCCC------------------TCCT

TTGCAGACCTGCCTCCCGGATACCTGCGCCCTGTGGCCAGCATGGGCTTCTCC------CTACCCTCAGACGTGCACTCT

TCTGACCTCGAGGACCCTGAAACTATGCAAACCGCCGCCCCAGGGGCCCAGCCTGAGCCCACAAGAACATTCCTGCCTGG

AGAGCCGCCTCCCTGCAGCCCCAGGAGCCTGGAGGAG---CCCGGGCTGCTCTCAGGGCCCAGGGAGGCCACCCAGGACC

TT

>Callithrix_jacchus

CTATTTTATTCTCTTTGAATGAGGTT--GAGTTCACACTGGAAAC-TGTGTGGCCAACAT-AAAACTCGTCCCAGTTTCA

CAGTCAGGAGACAGAGCCAACAGAGGG--TGTTTTAG--------------TTTTTT-----------------------

-TCCCTTAG-----------------------------GTTTT--TTTT-CTTTGCAGCTAATGGGACGTGATGCCTCTG

ACATGCTGCCGGCTTGTTCTGGTTCAGGGAAAACCCTGATTCAAGCATCATGCTCTATGAATCCCCCC---TTTCTGGTT

--GCCCACCCCACAGGGTCCCAGAGAAGG------------CTCC---CTCAGGTGGCAAGGGCTGTT--GGGAAGCTTT

AAGGCCACTCTGGTGGGGAAGGAGGGCCTGGCCTCAAACTGCTCACT----------------------TTTTTTTTTTT

TTTTTTTGAGACAGAG------GGTCTCCCTTTGTCACCCAGGCTGAAGTGCAGTGGCACAAACACGGTTCACTGCAGCC

T-GTCTTCCTGGGCTCACGCCATCCTCCCACCTCAGCCTCCCGTGTCACCGGGACCACAGGCGCTCA-CGCCATGCCCAG

-----CTCATCGTTTTTTAA-TGTC------------------GGGGGTGCTCACTCTGTTGCCTAGGCTGGTC------

---------TTGAACTCCTGGCCTTAA---ATGATTCTCCTGCCTCAGCTTCCCAAAGTATTGGGATTGTGG---GC---

ATGAGCCACTGCACCCAGCC-----AGGCTGCCCCCTTAATTAACCTAACTC-GAACACTTTCCCTGCCATCAGTCTTGC

AGGCCTG--CAGCTGGCCCCGGACCCTCCTGCATGGGCTTGGGTC-------TGAAGGTTCAAGGCCACTGTTCCTCGTC

CCATCCCAG-GACACCCCCT-CCCCACTGCTCCTGGCTCGCTGCTCACCTGT--CCCC------------------TCCT

TTGCAGACCTGCCTCCCGGATACCTGCGCCCTGTGGCCAGCATGGGCTTCTCT------CTACCCTCAGACGTGCACTCT

TCTGACCTCGAGGACCCTGAAACTATGCAAACCGCCGCCCTAGGGGCCCAGCCTGAGCCCACAAGGACATTCCTGCCTGG

CGAGCTGCCTCCCTGCAGCCCCAGGAGCCTGGAGGAG---CCCGGGCTGCTCTCAGGGCCCAGGGAGGCTACCCAGGACC

TT

>Plecturocebus_donacophilus

CTATTTGATTC--TCTGAATGAGGCTGAGAGTTCACACTGGAAAT-GGTGTGGCCAACAT-AAAACTCGTCCCAGTTTCA

CAGTCAGGAGACGGAGCCAACA-GAGC--TTTTTCCG-T------------TTTTTT-----------------------

-CCCTTAGG-----------------------------GTTTT--TTTT--TTTACAGCTGATAGGACGTGGTGC--CTG

ACATGCTGCCAGCTCGTTCTGGTTCAGGGAAAACCCTGATGCAAGCATCATGCTTTACGAATCCCCCC---TTTCTGGTC

--GCCCACCCCACAGGGTCCCAGAGATTGCTCCTGAGTCCACTCC---CTCAGGTGGCCAGGGCTGTT-GGGGGAGCTTT

AAGGCCACTCTGGTTGGGAAGGAGGGCCTGGCCTCAGGCTGCTCACA---------------------------C--TTT

TTTTTTTGAGACAG--------GGTCTCCCTTTGCCACCAAGGCTGAAGTGCAGTGGCACAAACACAGTTCACTGCAGCC

T-GTCTTCCTGGGATCACACCATCCTCCCACCACAGCCTTCCGTGTCGCCGGGACCACAGGCGCTCACCGCCATGCCCAG

-----CTCATCATTTTTTAA-TGTTTCTCT---AG---TC---GGGGGTGCTCACTCTGTTGCCCAGGCTGGTC------

---------TTGAACTCCTGGCCTTAA---ATGATTCTCCTGCCTCAGCTTCCCAAAGTATTGGGATTGTGG---GC---

ATGAGCCACTGCACCCAGCC-----AGGCCGCCCCCTTAATTAACCTGACAC-TAACACTTTCCCCGCCCTCAGTCTTGC

AGGCCTG--CAGCTGGCCCAGGACCCTCCCAGATGGGCTTGGGTC-------TGAAGGTTTGAGGCCACTGTTCCTCGTC

CCATCCCAG-GACACCCCCT-CCCTACCGCTCCTGGCTCCCTGCTCACCTGT--CCCC------------------TCCT

TTGCAGACCTGCCTCCCGGATACCTGCGCCCCGTGGCCAGCATGGGCTTCTCC------CTACCCTCAGACGTGCACTCT

TCTGACCTCGAGGACCCTGAAACTATGCAAACCGCCGCCCCAGGGGCCCAGCCTGAGCCCACAAGGACATTCCTGCCTGG

GGAGCCACCTCCCTGCAGCCCCAGGAGCCTGGAGGAG---CCCGGGCTGCTCTCAGGGCCCAGGGAGGCCACCCAGGTCC

TT

>Pithecia_pithecia

CTATTTGATTC--TCTGAATGAGGCTGAGAGTTCACACTGGAAAC-CGTGTGGCCAACAT-AAAACTCGTCCCAGTTTCA

CAGTCAGGAGACGGAGCCAACA-GAGA--TTTTTCAG-T------------TTTTTT-----------------------

-CCCTTAGA-----------------------------TTTTT--TTTT--TTTGCAGCTGATAGGACGTGATGCCTCTG

ACATGCTGCCAGCTCGTTCTGGTTCAGGGAAAACCCTCATTCAAGCATCATGCTTTAACAATCCTCCC---TTTCTGGTC

--GCCCACCCCACAGGGTCCCAGAGATTGCTCCTGAGGCCACTCC---CTCAGGTGGCCAGGGCTGTT-GGGAGAGCTTT

AAGGCCACTCTGGTCGGGAAGGAGGGCCTGGCCTCGGGCTGCTCACA---------------------------CTTTTT

TTTTTTTGAGACAG--------GGTCTCCCTTTGTCGGCCAGGCTGAAGTGCAGTGGCAGAAACACAGTTCACTGCAGCC

T-GTCTTCCCGGGCTCACGCCATCCTCCCACCACAGCCTCCCGTGTCGCCAGGACCACAGGCGCTCACCGCCATGCCCAG

CTCGTCTCGTCGTTTTTTGA-TGTTTCTAT---AG---TC---GGGGGTGCTCACTGTGTTGCCCAGGCTGGTC------

---------TTGAACTCCTGGCCTTAA---ATGATTCTCCTGCCTCAGCTTCCCAAAGTATTGGGATTGTGG---GC---

ATGAGCCACTGCACCCAGCC-----AGGCCGCCCCCTTAATTAACCTGACAC-TAACACTTTCCCCGCCCTCAGTCTTGC

AGGCCTG--CAGCTGGCCCCGCACCCTCTCACATGGGCTTGAGTC-------TGAAGGTTCGAGGCCACTGTTCCTCGTC

CCATCCCAG-GACACCCCCT-CCCCACTGCTCCTGGCTCTCTGCTCACCTGT--CTCC------------------TCCT

TTGCAGACCTGCCTCCCGGATACCTGCGCCCCGTGGCCAGCATGGGCTTCTCC------CTACCTTCAGACGTGCACTCT

TCTGACCTCGAGGACCCTGAAACTATGCAAACCGCCGCCCCAGGGGCCCAGCCTGAGCCCACAAGGACATTCCTGCCTGG

GGAGCCACCTCCCTGCAGCCCCAGGAGCCTGGAGGAG---CCCGGGCTGCTCTCAGGGCCCAGGGAGGCCACCCAGGACC

TT

>Saimiri_boliviensis

CTGTTTGATTCTCTCTGAATGAGGCTGAGAGTTCACATTGGAAAC-CGTG-GGCCAACAT-AAAACTCGTCCCAGTTTCA

CAGTCAGGAGACGGAGCCCACAGAGGG--TTTTTTAG-T------------TTTTTC-----------------------

-CCCTTAGGTTTTTTTTT-------------------TTTTTT--TTTTTCTTTGCAGCTAATGGGACGTGATGCCTCTG

ACATGCTGCCGGC----------TCAGGGAAAACCCTGACCCAAGCATCATGCTGTACAAATGCCCCC---GTTCCGGCT

--GCCCACACCACAGGGTCCCAGACATAG------------CTCC---CCCAGGTGGCCAGGGTTGTT-GGGGGAGCTTT

AAGGCCACTCTGGTGGGGAAGGAGGGCGTGGCCTCAAGCTGCTCACA--------------------------CTTTTTT

TTTTTTTGAGACAG--------GGTCTCCCTTTGTCGCCCAGGCTGAAGTGCAGTGGCACAAACGTGCGTCACTGCAGCC

T-GTCTTCCTGGGCTCACGCCATCCGCCCACCACCGCCTCCCGTGTCGCCGGGACCACAGGCGCTCCCCGCCATGCCCAG

-----CTCATCGTTTTTTAA-TGTTTCTAT---AG---T----GGGGGTGCTCACTCTGTTGCCCAGGCTGGTC------

---------TTGAACTCCTGGCCTTAA---ATGATTCTCCTCCCTCAGCCTCCGAAAGTATTGGGATTGTGG---GC---

ATGAGCCAC-GCACCCCGCC-----AGGTCCCCGCCTTGATTAACCTAACAC-TAACACTTT-----CCATCAGCCTTGC

AGGCCTG--CAGCTGGCCCCGGACTCTCCCGCATGGGCTTGGGTC-------TGAGGGTTCGAGGCCACCGTTCCTCGTC

CCATTCTAG-GACACTCCCT-CCCCACCGCTCCTGGCTCCCTGCTCACCTGT--CCCC------------------TCCT

TTGCAGACCTGCCTCCCGGATACCTGCGCCCCGTGGCCAGCATGGGCTTCTCC------CTCCCCTCAGACGTGCACTCT

TCTGACCTCGAGGACCCTGAAACTATGCAAACCGCCGCCCCAGGGGCCCAGCCGGAGCCCACAAGGACATTCCTGCCTGG

GGAGCCGCCTCCCTGCAGCCCCAGGAGCCTGGAGGAG---CCCGGGCTGCTCTCAGGGCCCAGGGAGGCCACCCAGGACC

TT

>Saguinus_imperator

CTATTTGATTCTCTCTGAATGAGGCT--GAGTTCACACTGGAAAC-GGTGTGGCCAACAT-AAAACTCGTCCCAGTTTCA

CAGTCAGGAGACAGAGCCAACAGAGGG--TGTTTTCG--------------TTTTTT-----------------------

-CCCTTAGG-----------------------------TTTTT--TTTT-CTTTGAAGCTAATGGGACGTGATGCCTCTG

ACATGCTGCCGGCTTGTTCTGGTTCAGGGAAAATCCTGATTCAAGCATCATGCTTTACGAATCCCCCC---TTTCTGGTT

--GCCCACCCCACAGGGTCCCAGAGACAG------------CTCC---CTCAGGTGGCCAGGGTTGCT--GGGAAGCTTT

AAGGCCACTCTGGTGGGGAAGGAGGGCCTGGCCTCAAGCTGCTCAC-----------------------------TTTTT

TTTTTTTGAGACAAAA------GGTCTCCCTTTGTCGCCCAGGCTGAAGTGCTGTGGCACAAACACAGTTCACTACAGCC

T-GTCTTCCTGGGCTCACGCCATCCTCCCACCTCAGCCTCCCATGTCACCGGGACCACAGGCGCTCA-CGCCATGCTTAG

-----CTCATCGTTTTTTAG-TGTTTCTAT---AG---TGGGGGGGGGTGCTCACTCTGTTGCCTAGGCTGGTC------

---------TTGAACTCCTGGCCTTAA---ATGATTCTCCTGTCTCAGCTTCCCAAAGTATTGGGATTGTGG---GC---

ATGAGCCACTGCACCCAGCC-----AGGCTGCCGTCTTAATTAACCTAACTC-GAACACTTTCCCCGCCATCAGTCTTGC

AGGCCTG--CAGCTGGCCCCAGACCCTCCCACATGGGCTTGGGTC-------TGAAGGTTCGAGGCCACTGTTCCTCGTC

CCATCCCAG-GACACCCCCT-CCCCACCACTCCTGGCTCCCTGCTCACCTGT--CCCC------------------TCCT

TTGCAGACCTGCCTCCCGGATACCTGCGCCCCGTGGCCAGCATGGGCTTCTCC------CTACCCTCAGACGTGCACTCT

TCTGACCTCGAGGACCCTGAAACTATGCAAACCGCCGCCCTAGGGGCCCAGCCTGAGCCCACAAGGACATTCCTGCCTGG

GGAGCTGCCTCACTGCAGCCCCAGGAGCCTAGAGGAG---CCCGGGCTGCTCTCAGGGCCCAGGGAGGCTACCCAGGACC

TT

>Daubentonia_madagascariensis

CTATTTGATTGTCTCTGAATTAGGCTGAGAGTTTACACTGGAAACCCGTGTGGTGAACAT-AAAACCCGTCCTAGTTTCA

CAATGAGGAGACTGAGCCAACAGAGGGGTTTTTT----------------------------------------------

----TCAG-----------------------------TTTTTT--TTTTTTATTGTAGTTAATGGGGCGTGATGCCTTCG

ACACGCTGCCGGCTCGTTCTGGTTCAGGGAAAACCTTGATTCAAGCATCATGTTTTAAAAATCCCCC---TTTTCTGGTG

--AGCCACACCACACCATGCCAGAGATGGCCCCAAGGAC---------CCCCAAGGCC----GCAGCA-GGAGGGGGCTC

ACGGCTGCCCTGCCCGGGAATGAGGGCCAG--CCCAGCCTGGCCTC----------------------------------

--------------------------------------------------------------------------------

--------------------------------------------------------------------------------

--------------------------------------------------------------------------------

--------------------------------------------------------------------------------

-------------------------AGGCTGCCCC-TCAGTTAACG-------TGACACTTTC----CCACGAATCCCAC

AGGCCCAGAGGGCTGGCCCCAGACCCTCCCTCCCAGGCTTGGGTCCGAGTGTTCAGGGCTCAAGGCCCCTCT-CCCCATC

CTGTGACAGCCACACCACCTCCCCCAGCTC-CCTGGCTCTCTCCTGACCCC-AACCTTCCGCCTTTCTCCACC---TCTT

TTGCAGACCTGCCTCCTGGACACACGCGTCCCGTGGCTGGCACGGGCTTCTGCTCCTCCCTGCCCTCGGACATGCACTCA

TCTGACCTCGAGGACCCCGAAACTATGCAAACCACCACCCCAGGGGCCCGGCCTGAGCTTACGAGGACGTTCCTGCCCGG

GGAGCTGCCCCCCTGCAGCCCTGTGCACCTGGAGGAG---CCTGGGCTGCTCTTGGGGGCCAGGGAGGCCACCCAGGACC

TT

>Eulemur_fulvus

CTATTCGGTTCT--CTGAATTAGGCTGAGAGTTTACACTGGAAACCCGTGTGGTGAACAT-AAAACCCGTCCTAGTTTCA

CAATAAGGAGACTGAGCCAACAGAGAGCTTTTTT-----------------TTTTTTTTTTTAAGGTTTTTTTTTTTTTT

TCCGTTAG-------------------------------CTTT--TTTTTTATTGTAGTTAATGGGGCGTAATGCCTTCG

ACACGCTGCCGGCGCGTTCTGGTTCAGGGAAAGCCCTGATTCAAGCATCATGTTTTAAAAATCCCTC---TTTTCTGGTG

--AGCCGCACCACACTGTGCCAGCCATGGCCCCGAAGAC---------CCCCAGGGCT----ACGGCA-GGA-GGGGCTC

GAGGCTGCCCTGCCTGGGAAGGAGGGCCAG--CTCAGCC-GGCCTC----------------------------------

--------------------------------------------------------------------------------

--------------------------------------------------------------------------------

--------------------------------------------------------------------------------

--------------------------------------------------------------------------------

-------------------------CGGCTGCCCC-TTAATTAACG-------TGACACTTTC----CCACGAGTCCTGT

GGGTCTA--------GCCCCAGATCCTCCCTCCCAGGCTTGGGTCTCAGTGGTTGGGGCTCGAGGCCCCTGG-CCCTGTC

CTGGAATGGCCACACCACCT-CCCCAGCTC-CCCGGCTCTCTCCTGACCCCTGACCTCCAGCT-CCCGCCCCC---TCTT

TTGCAGACCTGCCTCCTGGATACGCGCACCCCACGGCCAGCGCGAGCTTCTCCGCCCCCCTGCCCTCAGACATGCACTCA

TCTGACCTCGAGGACCCCGAAACTATGCAAACCGCCGCCCCAGGGGCCCAGCCTGAGCCTACAAGGACGTTCCTGCCCGG

GGAGCTGCCCCCCTGCGGCCCCGTGAGCCTGGAGGAGCAGCCCGGGCTGCTCTTGGGGGCCAGGGAGGCCGCCCAGAACC

TT

>Eulemur_macaco

CTATTCGGTTCT--CTGAATTAGGCTGAGAGTTTACACTGGAAACCCGTGTGGTGAACAT-AAAA-CCGTCCTAGTTTCA

CAATAAGGAGACTGAGCCAACAGAGAGCTTTTTT-----------------TTTTTTTTTTAAGGGTTTTTTTTTTTTCC

CCCGTTAG-------------------------------CTTT--TTTTTTATTGTAGTTAATGGGGCGTAATGCCTTCG

ACACGCTGCTGGCGCGTTCTGGTTCAGGGAAAGCCCTGATTCAAGCATCATGTTTTAAAAATCCCTC---TTTTCTGGTG

--AGCCGCACCACACTGTGCCAGCCATGGCCCCGAAGAC---------CCCCAGGGCT----ACGGCA-GGA-GGGGCTC

GAGGCTGCCCTGCCTGGGAAGGAGGGCCAG--CTCAGCC-GGCCTC----------------------------------

--------------------------------------------------------------------------------

--------------------------------------------------------------------------------

--------------------------------------------------------------------------------

--------------------------------------------------------------------------------

-------------------------CGGCTGCCCC-TTAATTAACG-------TGACACTTTC----CCACGAGTCCTGT

GGGTCTA--------GCCCCAGATCCTCCCTCCCAGGCTTGGGTCCCAGTGGTTGGGGCTCGAGGCCCCTGG-CCCTGTC

CTGGAATGGCCACACCACCT-CCCCAGCTC-CCCGGCTCTCTCCTGACCCCTGACCTCCAGCT-CCCGCCCCC---TCTT

TTGCAGACCTGCCTCCTGGATACGTGCACCCCACGGCCAGCGCGAGCTTCTCCGCCCCCCTGCCCTCAGACATGCACTCA

TCTGACCTCGAGGACCCCGAAACTATGCAAACCGCCGCCCCAGGGGCCCAGCCTGAGCCTACAAGGACGTTCCTGCCCGG

GGAGCTGCCCCCCTGCGGCCCCGTGAACCTGGAGGAGCAACCCGGGCTGCTCTTGGGGGCCAGGGAGGCCGCCCAGAACC

TT

>Indri_indri

CTATTTGGTTCTCTCTGAATCGGGCTGAGAGTTTACACTGGAAACCCGTGTGGTGAACAT-AAAACCCGTCCTAGTTTCA

CGATAAGGAGATTGAGCCAACAGAGAGCTTTTTT-----------------TTTTTTTT---AGGTTTTTTTTTT-----

-TCCTTAG---------------------------------TT--TTTTTTATTGCAGTTAATGGGGCATAATGCCTTCG

ACACGCTGCCGGTGCGTTCTGGTTCAGGGAAAGCCCTGATTCAAGCATCGTGTTTTAAAAATCCCTC---TTTTCTGGTG

--AGCCGCA-CACACTGGGCCAGCGACGGGCCCGAGGAC---------CTCGAGGGCT----GCAGCA-GGA-GGGGCTT

GAGGCTGCCCTGCCAGGGAAGGAGGCCCAG--CCCGGCC-AGCCTC----------------------------------

--------------------------------------------------------------------------------

--------------------------------------------------------------------------------

--------------------------------------------------------------------------------

--------------------------------------------------------------------------------

-------------------------AGGCTGCCTC-TTGATGAACG-------TGACACTTTC----CCATGAGTCCTGT

GGGCCTAGCGGGCTGGCCCCAGACCCTCCCTCCCAGGCTTGGGTCCCAGTGTTTGGGGCTCCAGGTCCCCGT-CTCCCTC

CTGTAACAGCCACACCGCCT-CCGCAGCTC-CCCGGCTCTCTCCTGACCCCTGACCTCCGGCCTCCCTCCCCG---TCTT

TTGCAGATCTGCCTCCTGGGTACACACGCCCCACGGCCCGCGCCGGCTTCTCCTCCTCCCTGCCCTCAGACATGCACTCA

TCTGACCTCGAGCACCCCGAAACTATGCAAACCGCTGCCCCAGGGGCCCAGCCTGAGCCTGCAAGGACGTTCCTGCCCGG

GGAGCTGCCCCCCTGCGGCCCCGTGAGCCAGGAGGAG---ACTGGGCTGCTCTTGGAGGAAAGGGAGGCCGCCCAGAACC

TT

>Lemur_catta

CTATTCGGTTCTCCCCGAACTAGGCTGAGAGTTTACACTGGAAACCCGTGTGGTGAACAG-AAAACCCATCCTAGTTTCA

CAATAAGGAGACTGAGCCAACAGAGAGCTTTTTT-----------------TTTTTT-----AAGGTTTTTTTTT-----

-CCCTTAG---------------------------------TT--TTTTTTATTGCAGTTAATGGGGCGTAATGCCTTCG

ACACGCTGCCGGCGCGTTCTGGTTCAGGGAAAGCCCTGATTCAAGCATCATGTTTTAAAAATCCCTC---TTTTCTGGTG

--AGCCACACCACACCATGCCAGCCATGGCCCCGAGGAC---------CCCCAGGGCT----GTGGCA-GGA-GGGGTTC

GAGGCTGCCCTGCCTGGGAAGGAGGGCCAG--CCCGGCC-GGCCTC----------------------------------

--------------------------------------------------------------------------------

--------------------------------------------------------------------------------

--------------------------------------------------------------------------------

--------------------------------------------------------------------------------

-------------------------CAGCTGCCCC-TTAATTAACG-------TGACACTTTC----CCACAAGTCCTGT

GGGTTTA--------GCCCCAGACCCTCCCTCCCAGGCTTGGGTCCCAGTGGTTGGGGCTCGAGGCCCCTGT-CCCCATC

CTATAACGGCCACACCTCCT-CCCCAGCTC-CCCAGCTCTCTCCTGATCCCTGACCTCCAGCC-CCCGCCCCC---TCTT

TTGCAGACCTGCCTCCCGGATACGCGCACCCCACGGCCAGCACGAGCTTCTCCGCCCCCCTGCCCTCAGACATGCACTCA

TCTGACCTCGAGGACCCCGAAACTATGCAAACCGCCGCCCCAGGGGCCCAGCCTGAGCCTACAAGGACGTTCCTGCCCGG

GGAGCTGCCCCCCTGCGGCCCCGTGAGCCTGGAGGAGCAGCCCGGACTGCTCTTGGGGGCCAGGGAGGCCGCCCAGAACC

TT

>Mirza_coquereli

CTATTCGGTTCTCTCTGAATTAGGCTGAGAGTTTACGCTGGAAACTCGTGTGGTGAACAT-AAAACCCGTCCTAGTTTCA

CAATAAGGAGACTGAGCCAACAGAGGGC-TTTTT-----------------TTTTTT-----------------------

-CCCTTAG------------------------------TTTTT--TTTTTTATTGCAGTTAATGGGGCGTAATGCCTTCG

ACACGCTGCCGGCGCGTTCTGGTTCAGGGAAAGCCCTGATTCAAGCATCGTGTTTTAAAAATCCCTC---TTTTTTGGTG

--AGCCGCA-CACGCCATGCCAGCGACGGCCCCGAGGAC---------CCCTAGGGCT----GCGGCA-GGA-GGGGCTG

GAGGCTGCCCTGCCTGGGGAGGAGGGCCAG--CCCCGCC-GGCCTC----------------------------------

--------------------------------------------------------------------------------

--------------------------------------------------------------------------------

--------------------------------------------------------------------------------

--------------------------------------------------------------------------------

-------------------------GGGCTGCGCC-TTAATTAACG-------TGACACTTTC----CCATGAGTCTCGT

GGGCCTGGCGGGCT-------GACCCTCCCTCCCGGGCTCGGGTCCCCCTGTTCGAGGCTTGAGGCCCCTGT-CCCCATC

TTCTAATGGCCACGACGCCT-CCCCGGCTC-TCT-CCTGACCCCTGACCCCTGACCTCCGGCCTCCCTCCCGC---TCTC

TTGCAGACCTGCCTCCTGGGTACACGCGCCCCATGGCCGGCGCGGGCTTCTCCTCCTCCCTGCCCTCAGACCTGCACTCA

TCTGACCTCGAGGACCCCGAAACTATGCAAACCGCCACCCCAGGGGCCCAGCCTGAGCCTGCAAGGACGTTCCTGCCCGG

GGAGCTGCCCCCCTGCGGCCCCGTGAGCCTGGAGGAG---CCCGGGCTGCTCCTGGGGGCCCGGGAGGTCGCCCAGAACC

TC

>Microcebus_murinus

CCATTCGGTTCTCTCTGAATTAGGCTGAGAGTTTACGCTGGAAACCCGTGCGGTGAACAT-AAAACCCGTCCTAGTTTCA

CAATAAGGAGACTGAGCCAACAGAGGGCTTTTTT-----------------TTTTTT-----------------------

-CCCTTAG-----------------------------TTTTTT--TTTTTTATTGCAGTTAATGGGGCGTAATGCCTTCG

ACACGCTGCCGGCGCGTTCTGGTTCAGGGAAAGCCCTGATTCAAGCATCGTGTTTTAAAAATCCCTC---TTTTCTGGTG

--AGCCGCA-CACACCATGCCAGCGACGGCCCCGAGGAC---------CCCCAGGGCT----GCGGCA-GGA-GGGGCTC

CAGGCTGCCCTGCCTGGGGAGGAGGGCCAG--CCCGGCC-GGCCTC----------------------------------

--------------------------------------------------------------------------------

--------------------------------------------------------------------------------

--------------------------------------------------------------------------------

--------------------------------------------------------------------------------

-------------------------GGGCTGCCCC-TTAATTAACG-------TGACACTTTC----CCATGAGTCTTGT

GGGCCTGGCGGGCT-------GACCCTCCCTCCTGGGCTCGGGTCCCCCTGTTCGGGGCTTGAGGCCCCTGT-CCCCATC

TTCTAACAGCCACGACGCCT-CCCCGGCTC-CCCGGCTCTCTCCTGACCCCTGACCTCTGGCCTCCCTCCTGC---TCTC

TTGCAGACCTGCCTCCTGGGTACACGCGCCCCATGGCCAGCGCGGGCTTCTCCTCCTCCCTGCCCTCAGACCTGCACTCA

TCTGACCTCGAGGACCCCGAAACTATGCAAACCGCCGCCCCAGGGGCCCAGCCTGAGCCTGCAAGGACGTTCCTGCCCGG

GGAGCTGCCCCCCTGCGGCCCCCTGAGCCTGGAGGAG---CCCGGGCTGCTCCTGGGGGCCCGGGAGGTCGCCCAGAACC

TC

>Nycticebus_coucang

CTATTTCATTCTCTCTGAATTAGGCTAAGAGTTTACATGGGAAACCCATGTGGCAAACAT-AAAACCCGTCCTAGTTTCA

CAATAAGAAGACTCAGCCAATGGTGTGGGGTTTTAAGGATTTTCCCCTTAGTTTTGTTTTTTGGGGTTTTGTTTG-----

-TTTTTTG-----------------------------TTTTTTGCTTTTTTGTTGCAATTAATGGGGTATAAAGCCTTAG

----GCTGCAGGCTTGCTCTGAGTCAGGGGAAACCCTAATTCAAGCATCATGTTTTAAGAGTCCCCCCCTTTTTCTGGTG

--ACCCACACCATACCATACCAGAGATAGCCCTGAGGTC---------CTCGGGTATCTCTAGCAGCA-GGA-GGGGTTC

GAGGCTGCCCTGCCTGGAAATCAGG---------------CGCCT-----------------------------------

--------------------------------------------------------------------------------

--------------------------------------------------------------------------------

--------------------------------------------------------------------------------

--------------------------------------------------------------------------------

-------------------------GTGCTGGCCC-CTAATTATTG-------CGACACTTTC----CCATGATCCCTGC

AGACCTAGAGGGCTGGCCCCAGATCTCCCCTT------------------------------------------------

---------------------CCCTAGCTC-CCCAG-TCTGTCCTGACCCTTGATCTCCCGTCTCTCTCCCACCTATTTC

CTGCAGACCTGCCTCCTGGGTACACGCGCCCAGCAGCCACCACCAGCTTCTCCTCCT---TGCCCTCAGACATGCACTCA

TCTGACCTCGAGGACCCCAAAACTATGCAAACCGCTGCCCCAGGGGCCCAGGCTGAGCCTATGAGGACGTTCCTGCCTAG

GGAGCCACCCCCATGCAGCCCTGTGAGCCTGGAAGGG---CCTGGGCTGCTCTTGGGGGCCAAGGAGGCCACCCAGGACC

TT

>Propithecus_coquereli

CTATTCAGTTCTCTCTGAATTAGGCTGAGAGTTTACACTGGAAACCCGTGTGGTGAACAT-AAAACCCGTCCTAGTTTCA

CAGTAAGGAGACTGAGCCAACAGAGAGCTTTTTT-----------------TTTTTT------AGGTTTTTTTTT-----

-CCCTTAG---------------------------------TT--TTTTTTATTGCAGTTAATGGGGCGTAATGCCTTCG

ACACGCTGCTGGCGCGTTCTGGTTCAAGGAAAGCCCTGATTCAAGCATCGTGTTTTAAAAATCCCTC---TTTTCTGGTG

--AGCCGCA-CACACTGGGCCAGCGACGGCCCCCGGGAC---------CCCCAGGGCT----GCAGCA-GGA-GAGGCTC

AAGGCTGCCCCGCCAGGGAAGGAGGCCCAG--CCCGGCC-AGCCTC----------------------------------

--------------------------------------------------------------------------------

--------------------------------------------------------------------------------

--------------------------------------------------------------------------------

--------------------------------------------------------------------------------

-------------------------AGGCTGCCCC-TTGATGAACG-------TGACACTTTC----CCATGAGTCCTGT

GGGCCTAGCGAGCTGGCCCCAGAGCCTCCCTCCCAGGCTTGGGTCCCAGTGTTCGGGGCTCGAGGCCCCTGT-CTCCATC

CTGTAACAGCCACACCGCCT-CCCCAGCTC-CCCGGCTCTCTCGTGACCCCTGACCTCCGGCCTCCCTCCCTG---TCTT

TTGCAGAACTGCCTCCTGGGTACACACGCCCCACGGCCAGCGCTGGCTTCTCCTCCTCCCTGCCCTCAGACATGCACTCA

TCTGACCTCGAGCACCCCGAAACTATGCAAACCGCCGCCCTAGGGGCCCAGCCTGAGCCTGCAAGGACGTTCCTGCCCGG

GGAGCTGCCCCCCTGCGGCCCCGTGAGGCTGGAGGAG---CCTGGGCTGCTCTTGGGGGCCAGGGAGGCCGCCCAGAACC

TT

>Prolemur_simus

CTATTCGGTTCTCCCCGAATTAGGCTGAGAGTTTACACTGGAAACCCGTGTGGTGAACAT-AAAACCCGTCCTAGTTTCA

CAATAAGGAGACTGAGCCAACAGAGAGC---TTT-----------------TTTTTT-----AAGGTTTTTTTTT-----

-CCCTTAG---------------------------------TT--TTTTTTATTGCAGTTAATGGGGCGTAATGCCTTCG

ACACGCTGCCGGCACGTTCTGGTTCAGGGAAAGCCCTGATTCAAGCATCATGTTTTAAAAATCCCTC---TTTTCTGGTG

--AGCCGCAGCACACTGTGCCAGCCATGGCCCCGAGGAC---------CCCCAGGGCT----GTGGCA-GGA-GGGGCTC

GAGGCTGCCCTGCCTGGGAAGGAGGGCCAG--CCCGGCC-GGCCTC----------------------------------

--------------------------------------------------------------------------------

--------------------------------------------------------------------------------

--------------------------------------------------------------------------------

--------------------------------------------------------------------------------

-------------------------CAGCTGCCCC-TTAATTAACG-------TGACACTTTC----CCACAAGTCCTGT

GGGTTTA--------GCCCCAGACCCTCCCTCCCAGGCTTGGGTCCCAGTGATTGGGGCTCGAGGCCCCTGT-CCCCATC

CTATAACGGCCACACCACCT-CCCCAGCTC-CCCGGCTCTCTCCTGATCCCTGACCTCCGGCCTCCCGCCCCC---TCTT

TTGCAGACCTGCCTCCTGGATACGCCCGCCCCACGGCCAGCGCGAGCTTCTCCGCCCCCCTGCCCTCAGACATGCACTCA

TCTGACCTCGAGGACCCCGAAACTATGCAAACCGCCGCCCCAGGGGCCCAGCCTGAGCCTACAAGGACGTTCCTGCCCGG

GGAGCTGCCCCCCTGCGGCCCCGTGAGCCTGGAGGAGCAGCCCAGACTGCTCTTAGGGGCCAGGGAGGCCGCCCAGAACC

TT

**AZI2**

>AluJb

--------------------------------------------------------------------------------

--------------------------------------------------------------------------------

--------------------------------------------------------------------------------

--------------------------------------------------------------------------------

--------------------------------------------------------------------------------

--------------------------------------------------------------------------------

--------------------------------------------------------------------------------

--------------------------------------------------------------------------------

--------------------------------------------------------TGAGAC---AG---GGTCTCCTCT

GTCGCCCAGGCTGGAGTGCAGTGGCGCGATCA---CGGC--TCACT---GCA---GCCTC---GACCTCCCGGGCTCAAG

CGATCCTCCTGCCTCAGCCTCCCGAGTAGCTGGGACTACAGGCGCGCGCCACCACGCCCGGCTAATTTTTGTATTTTTTG

TAGAGACGGGGTTTCACCATGTTGCCCAGGCTGGTCTCGAACTCCTGGGCTCAAGTGATCCTCCCGCCTCGGCCTCCCAA

AGTGCTGGGATTACAGGCGTGAGCCACCGCGCCCGGCC------------------------------------------

--------------------------------------------------------------------------------

--------------------------------------------------------------------------------

-----------------------------------

>Homo_sapiens

GTCTTCTTCCATAAGTCACTTTG---TGTAGGTCCTTAGATTTCTTTTATGACTTAACCTTAAAAACAAA--AAATGGAT

ATTGTTTGGATACTGA-TGTAACCT---------CTGATCACAATAAATTTGT-AGAATAAAATTTAATTG---------

-------------------------------------------------------------TTA----A----TAACAGC

TT------------------------------------------------------------------------------

------------------------------TGAATTT-AA----------------------------------------

----------------------------GTAATACAAA-------AACAGGATGCCTTA----AACTTTCTGAACATTTA

GTAATATTTTAGGTATGATTTTAGGGAACTA-GCTATGTGGAGGTATTCTGTAATA----CTGAATTT-GTACAT-GAAG

AAT-TATTCATTA-----------------T----ATATAATAACATTCCTTTGTCTTAAGAGCCTACTTGGCCATTGTT

--AGTCTT---TGGGATAGCATGAAATTT---ATTTTTTTTTGTTT-TTTGTTTTTTGAGAC---AG---AGTATC---T

GTAGCACAGCCTGGAGTGCAGTGGCGCAATCA---TGGGA-TAGCA---TGA---ATTTT---GAGGA--CTGTTCCCTC

TTCGCATAA-----GAATAGAAGTAGCCATCAGAGTTCATATACTT--T----TTCAACCCTTTTTCCTCAAATACGTAT

CATTTTT-ACTTAAGTAACTTCAATTCTGTGTTTTAAGCTATCTAATAATTGTTGTTTCTACTATGTTAAGATAGCCTCT

CTACATTGTTACCCTCCATCCAATAAAAAA-TACTGATCTGACTTCATTGTTTTATCATTTGGCTTCCAAAGTTTACTGA

CCTAAGTAAATAATGTGAATTGTGTCAGGCCAATTTCTATCAAAAA-CCTGCTTTAGAGAAATG------ATCAATTAGG

AAAAACAATTTGAGGAAATGAGATACAGCCACTCTTCTAGATCAGGGGTTGGCAGACTTTTTCT----ATAAAGTGCCAG

CAGTAACTGTTTTATTCGGCTTTGTGAGCTGGCAG

>Pan_troglodytes

GTCTTCTTCCATAAGTCACTTTG---TGTAGGTCCTTAGATTTCTTTTATGACTTAATCTTAAAAACAAA--AAATGGAT

ATTGTTTGGATACTGA-TGTAACCT---------CTGATCACAATAAATGTGT-AGAATAAAATTTAATTG---------

-------------------------------------------------------------TTA----A----TAACAGC

TT------------------------------------------------------------------------------

------------------------------TGAATTT-AA----------------------------------------

----------------------------GTAATACAAA-------AACAGGATGCCTTA----AACTTTCTGAACATTTA

GTAATATTTTAGGTATGATTTTAGGGAACTA-GCTATGTGGAGGTATTCTGTAATA----CTGAATTT-GTACAT-GAAG

AAT-TATTCATTA-----------------T----ATATAATAACATTCCTTTGTCTTAAGAGCTTACTTGGCCATTGTT

--AGTCTT---TGGGATAGCATGAAATTT---ATTTTTTTTTGTTT-TTTGTTTTTTGAGAC---AG---AGTATC---T

GTAGCACAGCCTGGAGTGCAGTGGCGCAATCA---TGGGA-TAGCA---TGA---ATTTT---GAGGA--CTGTTCCCTC

TTCGCATAA-----GAATAGAAGTAGCCATCAGAGTTCATATACTT--T----TTCAACCCTTTTTCCTCAAATACGTAT

CATTTTT-ACTTAAGTAACTTCAGTTCTGTGTTTTAAGCTATCTAATAATTGTTGTTTCTACTATGTTAAGATAGCCTCT

CTACATTGTTACCCTCCATCCAATAAAAAA-TACTGATCTGACTTCATTGTTTTATCATTTGGCTTCCAAAGTTTACTGA

CCTAAGTAAATAATGTGAATTGTGTCAGGCCAATTTCTATCAAAAA-CCTGCTTTAGAGAAATG-----GATCAATTAGG

AAAAACAATTTGAGGAAATGAGATACAGCCACTCTTCTAGATCAGGGGTTGGCAGACTTTTTCT----ATAAAGTGCCAG

CAGTAACTGTTTTATTCGGCTTTGTGAGCTGGCAG

>Macaca_mulatta

GTCCTCTTCCATAAGTCACTTTG---TGTAGGTCCTTAGATTTCTTTTATGACTTAACCCTAAAAACAAA--AAATGGAT

GTTGTTTGGATACTGAATGTAACCT---------CTGATCACAATATATTTAT-AAAATAAAATTTAATTG---------

-------------------------------------------------------------TTA----A----TAACAGC

TT------------------------------------------------------------------------------

------------------------------TGAATTT-AA----------------------------------------

----------------------------GTAGCAGAAA-------AATGGGATGCCTTA----AACTTTCTGAACATTTA

GTAATATTTTAGGTATGATTTTAGGGAACTA-GCTTTGTGGAAGTATTCTGTAATA----CTGAATTT-GTACAT-GAAG

AAT-TATTCATTA-----------------TCTATATACAATAACATTCCTTTGTCTTAAGAGCTTACTTGGCCGTTGTT

--AGTCTT---TGGGATAGCATGAAATTT---ATTTTGTTT-GTTG-TTTGTTTTTTGAGAC---AG---AGTCTC---T

GTAGCGCCGCCTGGAGTGCAGTGGCGCAATCA---TGGGA-TAGCA---TGA---ATTTT---CAGGA--CTGTTCCCTC

TTCCCATAA-----GAATAGAAGTAGCCATCAGAGTCCATATACTT--T----TTCAACCCTTTTTCCTCAAATACGTAT

CATTTTT-ACTTAAGTAACTTCAGTTCTGTGTTTTAAACTATCTAATAATTGTTGTTTCTACTATGTTAAGATAGCCTCT

CTACATTGTTACCCTCCATCCAATAAAAAA-TAGTGATCTGACTTCATTGTTTTGTCATTTGGTTTCCAAAGTTTACTGA

CCTAAGTAAATAATGTGAATTGTGTCAGGCCAATTTCTATCAAAAA-CCCGCTTGAGAGAAATG------ATCAATTAGG

AAAAACAATCTGAGGAAATGACATACAGCCATTCTTCTAGATCAGGGGTTGGCAGACTTTTTCT----ATAAAGTGCCGG

CAGTAACTGTTTTATTCGGCTT-GTGAGCTGGCAG

>Rhinopithecus_roxellana

GTCCTCTTCCATAAGTCACTTTG---TGTAGGTCCTTAGATTTCTTTTATGACTTAACCTTAAAAACAAA--AAATGGAT

GTTGTTTGGATACTGAATGTAACCT---------CTGATCACAATATATTTAT-AAAATAAAATTTAATTG---------

-------------------------------------------------------------TTA----A----TAACAGC

TT------------------------------------------------------------------------------

------------------------------TGAATTT-AA----------------------------------------

----------------------------GTAGTAGAAA-------AATGGGATGCCTTA----AACTTTCTGAACATTTA

GTAATATTTTAGGTATGATTTTAGGGAACTA-GCTTTCTGGAAGTAGTCTGTAATA----CTGAATTT-GTACAT-GAAG

A-T-TATTCATTA-----------------TCTATATACAATAACATTCCTTTGTCTTAAGAGCTTACTTGGCCATTGTT

--AGTCTT---GGGGATAGCATGAAATTT---ATTTTTTTT-GTTG-TTTGTTTTTTGAGAC---AG---AGTCTC---T

GTAGCGCAGCCTGGAGTGCAGTGGCGCAATCA---TGGGA-TAGCA---TGA---ATTTT---GAGGA--CTGTTCCTTC

TTCGCATAG-----GAATAGAAGTAGCCATCAGAGTCCCTATACTT--T----TTCAACCCTTTTTCCTCAAATACGTAT

CATTTTT-ACTTAAGTAACTTCAGTTCTGTGTTTTAAACTATCTAATAATTGTTGTTTCTACTATGTTAAGATAGCCTCT

CTACATTGTTGCCCTCCATCCAATAAAAAA-TAGTGATCTGACTTCATTGTTTTGTCATTTGGCTTCCAAAGTTTACTGA

CCTAAGTAAATAATGTGAATTGTGTCAGGCCAATTTCTATCAAAAA-CCTGCTTGAGAGAAATG------ATCAATTAGG

AAAAACAATTTGAGGAAATGACATATAGCCATTCTTCTAGATCAGGGGTTGGCAGACTTTTTCTTTTTATAAAGTGCCAG

CAGTAACT--TTTATTCGGCTTTGTGAGCTGGCAG

>Ateles_geoffroyi

GTCCTTTTCTATAAATCACTTTG---TGTAGGTCCTTAGATTTCTTTTATAACTTAACCTGAAAAT------GAATGGAT

GTTGTTTGGATACTGAATGTAACCT---------CTGATCACAATATATTTAT-AAAACAAAATTTAATTG---------

-------------------------------------------------------------TTACTTAA----CAACAGC

TT------------------------------------------------------------------------------

------------------------------TGAATTT-AA----------------------------------------

----------------------------GTAGTGGAAA-------AATGGGATGCCTTA----AACTATGTGACTATTCA

GTAGTATTTTAGGTATGATTTTAGGGAATTA-GTTATGTGAAAGTATTCTGTAATA----CTGAATTT-GTACATAGAAG

AAT-TATTCTTTA-----------------TGTATATACAATAACATTCCTTTTACTTAAGGGCATACTTGGCCAATGTT

--AGTCTT---TGGGATAGAATGAAATTT---TTTTTTTTTTTTTT-TTTTTTTTTTGAGAC---AG---GGTCTC---T

GTAGTGCAGCCTGGAGTGTAGTGGCACAATCA---TGGGA-TAGCA---TGA---ATTTT---GAG-A--CTATTCCCTC

TTCGCGTAA-----GAATAGAAGTAGCCATCAGAGTTTATATACTT--T----TTCAACCCATTTTCCTCAAATACATAT

CATTTTT-ACTTAAGTAACTTCAGTTCTATGTTTTAAGTGATCTAATAATTGTTGTTTCTACTATGTTAAGATAGCCTCT

CTACATTGTTAGCCTCCCTCCAATAAAAA--TACTGATCGGACTTCATTGTTTGATCATTTGGCTTCCAAAGTTTACTGA

CTGGAGTAAATAATGTGAATCAGGTCAGGCCAGTTCCTATCAAAAA-CCTGCTTGAGAGAAATG------ATCAATTAGG

AAAAACAATTTGAGGAAATGACATACAGCTACTCTTCTAGATCAGGGGTTGACAGACTTTTTCT----ATGAACTGCCAG

CAGTAACTCTTTTATTAGACTATGTGAGCTGGCAG

>Aotus_nancymaae

ATCCTTTTCCATAAATCACTTTG---TATAGGTCCTTAGATT-CTTTTATGA----------------------------

------------CTGAATGTAACCT---------CTGATCACAATATATTTAT-AAAACAAAATTTAATTG---------

-------------------------------------------------------------TTATGTAA----CAACAGC

TT------------------------------------------------------------------------------

------------------------------TGAATTT-AA----------------------------------------

----------------------------GTAGTGGAAA-------AATGGGTTGTCTTA----AAATCTCTGAATATTCA

GTAGTATTTTAG-TATGATTTTAGGGAACTA-GTTATGTGAAAGTATTCTGTAATA----CTTAATTT-GTACATAGAAG

AAT-TATTCGTTA-----------------TGTATATACAATAACTTTCCTTTTACTTAAGGGTATACTTGGCCAGTGTT

--AGTCTT---TGGGATAGAATGAAATTG---TTTTTCTTTTTTTT-----------GAGAC---AG---GGTCTC---T

GTAGCGCAGCCTGGAGTACAGTGGCACAATCA---TAGGAATAGCA---TGA---ATTTT---GAGGA--CTATTCCCTC

TTCGCATAA-----GAATAGAAGTAGCCATCAGAGTTTATATACTT--T----TTCAACCCATTTTCCTCAAATACATAT

CATTTTT-ACTTAAGTAACTTCAGTTCTATGTTTTAAGTGATCTAATAATTGTTGTTTCTACTATGTTAAGATAGCCTCT

CTACATTGTTACCCTCCATCCAATAAAAA--TACTGATCTGACTTCATTGTTTGATCATTTGGCTTCCGAGGTTTACTGA

CTGAAGTAAATAATGTGAATCATGTCACGCCAGTTCCTATCAAAAA-CCTGCTTGAGAGAAATG------ATCAATTAGG

AAAAACAATTTGAGGCAATGACATATAGCTACTCTTCTAGATCAGGGGTTGACAGACTTTTTCT----ATAAAGTGCCAG

CAGTAACTGTTTTATTAGACTATGTGAGCTGGCAG

>Cebus_capucinus_imitator

ATCCTTTTCCATAAATCACTTTG---TGTAGGTCCTTAGATTTCTTTTATGATTTAACCTTAAAAT------GCATGGAT

GTTGTTTTGATACTGAATGTAACCT---------CTGATCACAATATATTTAT-AAAACAAAATGTAATTG---------

-------------------------------------------------------------TTACGTAA----CAACAGC

TT------------------------------------------------------------------------------

------------------------------TGAATTT-AA----------------------------------------

----------------------------GTAGTGGAAA-------AATGGGATGCCTTA----AA--CTCTGAATATTCA

GTAGTATTTTAG------------GGAGCTA-GTTATGTGAAAGTATTCTGTAATA----CTTAATTT-GTACCTAGAAG

AAT-TATTTGTTA-----------------TGTATATACAATAACATTCCTTTTACTTAAGGGTGTACTTG-CCAGTGTT

--AGTCTT---TGGGATAGAATGAAATTT---TTTTTTTTTTTTTTCTTGTTTTTTTGAGAC---AG---GGTCTC---T

GTAGCACAGCCTGGAGTGCAGTGGCACAATCA---TGGGA-TAGCA---TGA---ATTTT---GAGGA--CTCTTCCCTC

TTCACATAA-----GAATAGAAGTAGCCATCAGAGTTTACATACTT--T----TCCAACCCATTTTCCTCAAATACATAT

CATTTTT-ACTTAAGTAACTTCAGTTCTATGTTTTAAGTTATCTAATAATTGTTGTTTCTACTATGTTAAGATAGCCTCT

CTACATTGTTACCCTCCATCCAATAAAAA--TACTGATCTGACTTCATTGATTGATCATTTGGCTTCCAAAGTTTACTGA

CTGAAGTAAATAATGTGAATCATGTCACGCCAGTTCCTATCAAAAA-CCTGCTTGAGAGAAATG------ATCAATTAGG

AAAAACAATTTGAGGAAATGACATATAGCTACTCTTCTAGATCAGGGGTTGACAGACTTTTTCT----ATAAAGTGCCAG

CAGTAACTGTTTTATTAGACTGTGTGAGCTGGCAG

>Callithrix_jacchus

AGCCTTTTCCATAAATCACTTTG---CGTAGGTCCTTAGATTTCTTTTACGACTTAACCTTAAAAT------GAATAGAT

GTTGTTTGGATACGGAATGTAACCT---------CTGATCACAATATATTTAT-AAAAGAAAAATTAATTG---------

-------------------------------------------------------------TTACGTAA----CAACAGC

TT------------------------------------------------------------------------------

------------------------------TGAATTTTAA----------------------------------------

----------------------------GTAGTGGGAA-------AATGGGATGCCTTA----AATTCTCTGAATATTCA

GTAGTATTTTAGGTATGATTTTAGGGAACTA-GTTATGTGAAAGAATTCTGTAATA----CTTAATTT-GTACATAAAAG

AAT-TATTCATTA-----------------TGTGTATACAGTAACATTCCTTTTACTTAAGGGTACACTTGGCCAGTGTT

--AGTCTT---TGGGATAGAATGACTTTT---TTTTTTTTTTTTTT----------TGAGAC---AA---GGTCTC---T

GTAGCGCATCCTGGAGTGCAGTGGCACAATCA---TGGGA-TAGCA---TGA---ATTTT---GAGGA--CTATTCCCTC

TTCACATAA-----GAATAGAAGTAGCCATCAGAGTTTATATACTT--T----TTCAACCCATGTTCCTCAAATACGTAT

CATTTTT-ACTTAAGTAACTTCAGTTCTATGTTTTAAGTGATCTAATAATTATTGTTTCTACTATGTTAAGATAGCCTCT

CTAAATTGTTACCCTCCATCCAATAAAAA--TACTGATCTGACTTCATTG----ATCATTTGGCTTCCAAAGTTTACTGA

CTGAAGTCAATAATGTGAATCATGTCACGCCAGTTCCTATCAAAAA-TCTGCTTGAGAGAAATG------ATCAATTAGG

AAAAACAATTTCAGGAAATGACATA--GCCACTCTTCTAGATCGGGGGTTGACAGACTCT--CT----GTAAAGTGCCAG

CAGTAACTGTTTTATTAGACTATGTGAACTGGCAG

>Tarsius_syrichta

GTTCTCTTCCATTG--CACTTTG---TGTAGGTACCTTGATTTCTTTT----TTTAACCTTAAAAACAAAACGAATAGGT

ACTATTTGGATACCGAATAGGTACTATTTGGATACTTATCATAATATATTTAT---TAAAAGATTTG-------------

-------------------------------------------------------------TTACTTAA----CAGCAGG

CG------------------------------------------------------------------------------

------------------------------TGAACTT-------------------------------------------

---------------------------TTTAGTAGAAAGTTGCACATTGAGATGCTGTAAACAAAGTTTCTGAATATTTA

GTAATATTTTAGATAGGATTTTAGGGAACTG-GCTACGTGGAAGTATTTTGTGCTA----TTGATTT--GTACAT-GAAA

AAT-TAGCGATT--------------------------------------TTTATATTCAGGACTAACTTGGGCAACCTT

--AATCTT---TTGGATAGCATAAATTTT---------------------------------------------------

---------------------------------------------------------------AAGAGACTGATTCCTTC

TTAAGGTAA-----GAATAGGAATAGCTATCAGAGTTCACATGCTTAAC----TTCAACCC--TTTTCCCATGTACTTAT

CATTTTT-ACTTAAGTTGCTTAAGTTCTGTGTTTTAAATTACCTAGTTATTTTTGTTTATACTATGTTAGAA--------

--ACATGGAGACCTTCCATTTGATGAAAAA-TACTGACTTGGCTTTAGTGTTTGATCATTTAATGTCCAAAGTTTACTGA

CCTAAGTAAATAATATGAATTG-----------TTCCTATCGAACA-CCTGCTGGGGAGAAATA------ATCAGTTGGG

GAAAGTAATTTGAGGAAATGACATGTAGCCATTCTTTGAAATCAGGGCTCAGCAAACTTTTTCT----ATAAAGTACCAG

CAGCCAATATTGTA---AGGCTTATGAGCTAGCCA

>Daubentonia_madagascariensis

GTTCTCTTCCATAGGTCACTTTG---TGTAGGTACCTAGATTTCTGTTATGGTTTAACCTTTAAAATTAAATGAATGCAT

ACTACTTGAATACTGAATGTGAACT---------CTGATTACTACATATTTAT-AAAAAAACATTTAACTG---------

-------------------------------------------------------------TTACTTAATTAACAACAAG

CT------------------------------------------------------------------------------

------------------------------TGAACTT-------------------------------------------

-----------------------------TAGTAGAAAGGTGCACATTGGGATGCCTTCTACAAAATTTCTGAATGTTCA

GTAATATTTTAGATATGATTTTAGGGAACAAAGCTATGTGGAAGTATTCTGTAATAAATCCTGATTTT-GTACAT-GAAG

AAT-TACTCATT------------------TCTATATAGAGTAATATCCCTTTGTCTTAAGG-CAAACATGGACAACCCT

ATAGTCTT---TGGGATAGCGTGAATTTT---------------------------------------------------

---------------------------------------------------------------AAGAAAATTATTCCCTC

TTAGGATAA-----GAACAAAAGTAGCTATCAGAGTTCATGTACTTGAC----TTCAGCCC-TTTTTCTCAAATACCTAC

TATTTTTTAATTAAGTTAA--AAGTTCTGTGTTTTAAATTA----ATAATTTTTGCTGGTACTATGTTGGGATAGCC---

----ATGGATACCTTCCATCTAATAAAAAAATACTGACTTGACTTCATTGTTTGA-CATTAGATTTTTGAAGTTTACTGG

CCTAAGTAAATAATGTGAATTGTCTCAGACCTATTATTATCAAAAAACCTGCTTGAGAGAAATGATCCAGATCAGTTAGG

AAAAACAATTTGAGGATATGACATGCAGCCACTTTTCTAGAGCAGGGGTCGGCAAACTTTTTCT----ATAAAGTGCCAA

CAGTAAATATTTTA---AGTTTTGTGAGCTGGTTG

>Eulemur_fulvus

GTTCTCTTCCACAGGTCACTTTG---TGTAGGTACCCAGACTTATGTTATGATTTAACTTTTAAAATGAAATGAATGGAT

ACTATTTGGATACTGAATGTGACCT---------CTGATCACAATATATTTTTTAAAAAAACATTTAACTA---------

-------------------------------------------------------------TTACTTAATCAACAAGAGG

CT------------------------------------------------------------------------------

------------------------------TAAACTT-------------------------------------------

-----------------------------TAGTAGAAAGGTGCACATTGGGATGCCTTATACAGAATTTCTGAATGTTCA

GTA-----TTAGATATGGTTTTAGGGAACTAAGCTATGTGGAAGTATTCTGTAATAATCCCTGATTTT-GTACAT-GAAG

AAT-TAGTCATT------------------TCTATATACAGTAATATCTCTTTGTCTTAAGGACAAACACAGACAACCCT

GTAGTCTT---TGGGATAGTGTGAATTTT---------------------------------------------------

---------------------------------------------------------------AAGAAAATTATTCCCTC

TTAGAATAA-----GAACAAAAGTAGCTATCAG--TTCACGTACTT---------CAACTC-TTTTTCTCAAATACCTAT

TATTTTT-ACTTAACTCAA--AAGTTCTATGTTTTAAATTATCTAATAATTTTTGTTGGTACCATGTTAGGGTAGCC---

----ATGGATACCTTCCAGCCAATAAAAAA-TACTGACTTGACTTCATTGTTTGGTCATTTGATTTTCAAAGTTTACTGA

CCTAAGTAAATAATGTGAATTGTTTCAGACCTATTCTTTTCAAAAA-CCTGCTTGAGAGAAATGATCAAGATCAATTAAG

GAAAACAATTTGAGGATATGACATGCAGCCACTCTTTTAGATTGGAGATTGGCAAACTTCTTCT----ATAAAGTGCCAG

CAGTAAATATGTTA---AGTTTTGTGAGCTGGCCA

>Eulemur_macaco

GTTCTCTTCCACAGGTCACTTTG---TGTAGGTACCCAGACTTATGTTATGATTTAACTTTTAAAATGAAATGAATGGAT

ACTATTTGGATACTGAATGTGACCT---------CTGATCACAATATATTTTTAAAAAAAACGTTTAACTA---------

-------------------------------------------------------------TTACTTAATCAACAAGAGG

CT------------------------------------------------------------------------------

------------------------------TAAACTT-------------------------------------------

-----------------------------TAGTAGAAAGGTGCACATTGGGATGCCTTATACAGAATTTCTGAATGTTCA

GTA-----TTAGATATGGTTTTAGGGAACTAAGCTATGTGGAAGTATTCTGTAATAAACCCTGATTTT-GTACAT-GAAG

AAT-TAGTCATT------------------TCTATATACAGTAATATCTCTTTGTCTTAAGGACAAACACAGACAACCCT

GTAGTCTT---TGGGATAGTGTGAATTTT---------------------------------------------------

---------------------------------------------------------------AAGAAAATTATTCCCTC

TTAGAATAA-----GAACAAAAGTAGCTATCAG--TTCACGTACTT---------CAACTC-TTTTTCTCAAATACCTAT

TATTTTT-ACTTAACTCAA--AAGTTCTGTGTTTTAAATTATCTAATAATTTTTGTTGGTACCATGTTAGGGTAGCC---

----ATGGATACCTTGCAGCCAATAAAAAA-TACTGACTTGACTTCATTGTTTGGTCATTTGATTTTCAAAGTTTACTGA

CCTAAGTAAATAATGTGAATTGTTTCAGACCTATTCTTTTCAAAAA-CCTGCTTGAGAGAAATGATCAAGATCAATTAAG

GAAAACAATTTGAGGATATGACATGCAGCCACTCTTTTAGATTGGAGATTGGCAAACTTCTTCT----ATAAAGTGCCAG

CAGTAAATATGTTA---AGTTTTGTGAGCTGGCCA

>Indri_indri

ATTCTCTTCCACAGATCACTTTA---TGTAGTTACCTAGATTTTTGTTATGATTTAACTTTTAAAATGAAATGAATGGAT

ACTATTTGGATACTGAATGTGACCT---------CCGATCACAATATATTTAT-AAAAAAACGTTTAACTA---------

-------------------------------------------------------------TTACTTAATCAACAATAGG

CT------------------------------------------------------------------------------

------------------------------TGAACTT-------------------------------------------

-----------------------------TAGTAGAAAGGTGCACATTGGGATGCCTAATATGGAATTTCTGAATGTTTA

GTA-----TTAGATATGATTTTAGGGAACTAACCTATGTGGAAGTATTCTGTAATAAACCCTGATTTT-GTACAT-GAAG

AAT-TAGTCATT------------------TCTATATACAGTAATATCCCTTTGTCTTAAGGGCAAACATGGACAACCCT

ATAGTCTG---TGGGATAGTGTGAATTTT---------------------------------------------------

---------------------------------------------------------------AAGAAA-TTATTCCCTC

TTAGGATAA-----GAACAAAAGTAGCTATCAGAGTTCATGTACTT---------CAACTC-TTTTTCTCAAATACTTAT

TATTTTT-ACTCAACTCAA--AAGTTCTGTGTTTTAAATTATCTAATAATTTTTGTTGGTGCTATGTTAGGATAGCC---

----ATGGATACCTTCTGTCTGATAAAAAA-TACTGACTTGACTTCATTGTTTGATCATTTGATTTTCAAAGTTTACTGA

CCTAAGTAAATAATGTGAATTGTTTCAGACCTATTCTTATCAAAAA-CCTGCTTGAGAGAAATGATCAAGATCAATTAAG

GAAAACAATTTGAGGGTGTGACATACAGCCACTCTTTTAGATTGGGGGTTGGCAAGCTTCTTCT----ATAAAGTGCCAG

CAGTAAATATTTTA---AGTTTTGTGAGCTGGCCA

>Lemur_catta

GTTCTCTTCCACAGGTCACTTTG---TATAGGTACCCAGACTTATGTTATGATTTAACTTTTAAAATGAAATGAATGGAT

ACTATTTAGATACTGAATGTGACCT---------CTGATCACAATATATTTTT-GAAAAAACATTTAACTA---------

-------------------------------------------------------------TTACTTAATCAACAATAGG

CT------------------------------------------------------------------------------

------------------------------TAAACTT-------------------------------------------

-----------------------------TAGTAGAAAGGTGCACATTGGGATG---------GAATTTCTGAATGTTCA

GTA-----TTAGATATGGTTTTAGGGAACTAAGCTATGTGGAAGTATTCTGTAATAAACCCTGATTTT-GTACAT-GACG

AAT-TTGTCATT------------------TCTATATACAGTAATATCCCTTTGTCTTAAGGACAAACACAGACAACCCT

ATAGTCTT---TGGGATAGTGTGAATTTT---------------------------------------------------

---------------------------------------------------------------AAGAAAATTATTCCCTC

TTAAGATAA-----GAACAAAAGTAGCTATCAG--TTCATGTAATT---------CAACTC-TGTTTCTAAAATACCTAT

TATTTTT-ACTTAACTCAA--AAGTTCTGTGTTTTAAATTATCTAATAATTTTTGTTGGTACTATGTTAGGATAGCC---

----ATGGATACCTTCCATCTAATAAAAAG-TATTGACTTGACTTCATTGTTTGGTCATTTGATTTTCAAAGTTTACTGA

CCTAAGTAAATAATGTGAATTATTTCAGACCTATTCTTTTCAAAAA-CCTGCTTAAGAGAAATGATCAAGATCAATTAAG

GAAAACAATTTGAGGATATGACATGCAGCCATTCTTTTAGATTGGAGATTGGCAAACTTCTTCT----ATAAAG------

CACTAAATATGTTA---AGTTTTGTGAGCTGGCCA

>Mirza_coquereli

GTTTTCTTCCACAGGTCACTTTG---TATAGGTACCTAGATTTCCGTTATGATTTAACTTTTAAAATGAAATGAATGGAT

ACTATTTGGATACTGAATGTGACTT---------CTGATCACAATATATTTAT-AAAAAAACATTTAACTA---------

-------------------------------------------------------------TTACTTAATCATCAATAGG

CT------------------------------------------------------------------------------

------------------------------TGAACTT-------------------------------------------

-----------------------------TGGTAGAAAGGTGCACATTGGAATGCCTTATATGGTATTTCTGAATGTTCA

GTA-----TTAGATATGATTTTAGGGAACTAGGCTATATGGAAGTATTCTGTAATAAACCCTGATTTT-TTACAT-GAAG

AAT-TAGTCATT------------------TCTATATACAGTAATATTCCTTTGTCTTAAGAGCAAACACACACCACCTT

ATAATCT----TGGGATAGTGTGAATTTT---------------------------------------------------

---------------------------------------------------------------AAGAAAATTATTCCCTC

TTAGGATAA-----GAACAAAAGTAGCTATCAGAGTTCATCTACTT---------TAGCTC-TTTTTCTCAAATACCTAT

TATTTTT-ACTTAACTCAA--AAGTTCTGTGTTTTAAATTATCTAATAATTTTTGTTGGTACTATGTTAGGATAGCC---

----ATGGATACCTTCCATCCAGTAAAAAA-TACTGACTTGACTTCATTGTTTGATCATTTGACTTTTAAAGTTTACTGA

CCTAAGTAAATAATGTGAATTGTTTCAGACCTATTCTTATCAAAAA-CCTGCTTGAGAGAAATGATCAAGATCAATTAAG

GAAAACAATTTGAGA-------------------TCGGAGATTGGAGGTTGGCAAACTTCT-------ATAAAGTACCAG

CAGTAAATATTTTA---AGTTTTGTGAGCTGGCCA

>Nycticebus_coucang

GTTCTCTTCCATAAGTCATTCTA---GATAGGTACTTAGGTTCCTGTTATGATTTAAGCTTTAAAATAAAATAAAGGGAT

ACTATTTGGATACTATATGTGACCT---------CTGTTCACAGTATGTTTAT-TA-AAAACACTTAACTGGCCCAGTGC

TATG-CTAACACCTATAATCCCAGTACTCTGAGAGGCCAAGGCAGGTGGATTGTCCTGAGCTCACAGGTTCAAGACCAGC

CTGAGCCAGAGAGAGACCTTGTCTCTAAAAATAGCCAGGTATCTATAGTCCCAGCTACTCAGGAGGCTAAGGCAAGAGGA

TTGCTTGAGCTCAAGAGTTGGAGGTTGCTGTGAACTGTGATGCCATGGCACTCTACCAAGGGCAACAAAGTGAGACTCTG

TCTCCAAAACAAAACA-----CTTAACCGTTGTAAAAAGATGCACATTGGGATACCTTATACGAAATTTCTAAGCGTTAA

GTGATATTTTAGATATGATTTAAGGGAATTAGGCTATGTGGAAGTATTCTGTAATAAACCCTGATTTTTATACAC-GAAT

AATATATACAGTGAGATATATATATATATATATATATATATTAACATGCCTTTGTCCTAAGGACAAACATAGACCACTGT

--AGTCCT---TGGGATAGTATGAATTTT---------------------------------------------------

---------------------------------------------------------------AAGATAACTATATCCTC

TTAGGGTAA-----GAATAAAAGTAGCTATCAGAGTTCATGTACTTGATTGACCCCAACCC-TTTTTCTCAAATATATAT

TTTTATTTACTTAACTTAA--AAGTTCTATGTTTTAAATTATCTAATTATTTTTGTTGGTACTATGTTAGGATAGCC---

----ATGGATACCTTTCATCCAAAAAAAAA----TA--CTGACTTCATTGTTTGATCATTTGATTTTAAAAGTTTACTGA

CCTAAGTAAATAATGTGAGTTGTCTCAGACCTATTCTTATCAAAAAACTTGCTTGAGAGAAATG------ATTACTTAGG

GAAAACAATTTGAGGGTGTGACATTTAGCCACTCTTCTAGATCAGGGGTCAGCAGACTTATTTTTAT-A--AAGTGCCAG

CAGTAAACTTTTAA---GGTTTTGTGACTGTGCCA

>Propithecus_coquereli

GTTCTCTTCCACAGATCACTTTG---TGTAGGTACCTAGATTTCTGTTATGATTTAACTTTTAAAATGAAATGAATGGAT

ACTATTTGGATACTGAATGTGACTT---------CCGATCACAATATATTTAT-AAAAAAACATTTAACTA---------

-------------------------------------------------------------TTACTTAATCAACAATAGG

CT------------------------------------------------------------------------------

------------------------------TGAACTT-------------------------------------------

-----------------------------TAGTAGAAAGGTGCACATTGGGATGCCTTATACGGAATTTCTGAATGATTA

GTA-----TTAGATATGATTTTAGGGAACTAAGGTATGTGGAAGTATTCTGTAATAAACCCTGATGTT-GTACAT-GAAG

AAT-TAGTCATT------------------TCTATCTATAGTAATATCCCTTTGTCTTAAGAGCAAACACGGACAACCCT

ATAGTCTT---TGGGATAGCGTGAATTTT---------------------------------------------------

---------------------------------------------------------------AAGAAA-TTATTCCCTC

TTAGGATAA-----GAACAGAAGTAGCTATCAGAGTTCATGTACTT---------CAACTC-TTTTTCTCAAATACCTAT

TATTGTT-ACTCAACTCAA--AAGTTCTATGTTTTAAATTATCTAATAATTTTTGTTGGTACTATGTTAGGATAGCC---

----GTGGATACCTTCTATCTGATAAAAAA-TACTGACTTGACTTCATTGTTTGATCATTTGATTTTCAAAGTTTACTGA

CCTAAGTAAATAATGTGAATTGTTTCAGACCTATTCTTATCAAAAA-CCTGCGTGAGAGAAATGATCAAGATCAGTTAAG

GAAAACAATTTGAGGATGTGACATGCAGCCACTCTTTTAGATTGGGGGTTGGCAAGCTTCTTCT----ATAAAGTGCCAG

CAGTAAATATTTTA---AGTTTTGTGAGCTGGCCA

>Prolemur_simus

GTTCTCTTCCACAGGTCACTTTG---TATAGGTACCCGGACTTATGTTATGATTTAACTTTTAAAATGAAATGAATGGAT

ACTATTTAGATACTGAATGTGACCT---------CTGATCACAATATATTTTT-GAAAAAACATTTAACTA---------

-------------------------------------------------------------TTACTTAATCAACAGTAGG

CT------------------------------------------------------------------------------

------------------------------TAAACTT-------------------------------------------

-----------------------------TAGTAGAAAGGTGCACATTGGGATG---------GAATTTCTGAATGTTCA

GTA-----TTAGATATGGTTTTAGGGAACTAAGCTATGTGGAAGTATTCTGTAATAAACCCTGATTTT-GTACAT-GAAG

AAT-TAGTCATT------------------TCTATATACAGTAATATCCCTTTGTCTTAAGGACAAACACAGACAACCCT

ATAGTCTT---TAGGATAGTGTGAATTTT---------------------------------------------------

---------------------------------------------------------------AAGAAAATTATTCCCTC

TTAAGATAA-----GAACAAAAGTAGCTATCAG--TTCATGTAATT---------CAACTC-TGTTTCTCAAATACCTAT

TATTTTT-ACTTAACTCAA--AAGTTCTGTGTTTTAAATTATCTAATAATTTTTGTTGGTGCTATGTTAGGATAACC---

----ATGGATACCTTCCATCTAATAAAAAG-TATTGACTT-----CATTGTTTGGTCATTTGATTTTCAAAGTTCACTGA

CCTAAGTAAATAATGTGAATTGTTTCAGACCTATTGTTTTCAAAAA-CCTGCTTAAGAGAAATGATCAAGATCAATTAAG

GAAAACAATTTGAGGATATGACATGCAGCCACTCTTTTAGATTGGAGATTGGCAAACTTCTTCT----ATAAAG------

CAGTACATATGTTA---AGTTTTGTGAGCTGGCCA

>Otolemur_garnettii

GTTCTCTTCCATAAGTCATTCTACTAGGTAGGTACTTAGGTTCTTGTTATGATTTAAGCTTTAAAATAAAATAAATGGAT

ACTATTTGGATACTGTATGTCATCT---------CTGTTCACAGTATGTTTAT-TAGAAAACACTCAACTGGCCTGGCGA

TGTGGCTCACGCCTGTAATCCCAGTACTCTGGGAGGCCGAGGCAGGTGGATTGCCCTGAGCTTACAAGTTCAAGACCAGC

CTGAGCCAGAGAGAGACCTTGTCTCTAAAAATAGCTGGGTACCTATAGTCCCAGCTATTCGGGAAGCTGAGGCGAGAGGA

TCACTTGAGCCC--GAGTTGGAAGTTACTGTGAGCTATAATGCCATGGCACTCTATCAAGGGCAACAAAGTGAGACTCAA

TCTCCAAAACAAAACAGAACACTTGACTGTTGTAAAAAGATGCACATTGGGATACCTTATATGAAATTTCTAAGTGTTAA

GTGATATTTTAGATATGATTTAAGGGAACTAAGCTATATGGAAGTATTCTGTAATAAACCCTGATTTTTGTACAT-GAAG

AATATATACAGTAA------------------TATATATAGTAATATGTCTT------AAGGACAAACATGGACAACTAT

--AGTCTT---TGGGATAGTATGAATTTT---------------------------------------------------

---------------------------------------------------------------AAGAAAGCTGTATCTTC

TTTGGATAA-----GAATAAAAGTAGCAATCAGAGTTCATGTACTTGAC---CCCCAACCC-TTTTTCTCAAATACATAT

TTTTA----CTTAACTTAA--AAGTTCTATGTTTTAAATTATCTAATTATTTTTGTTGGTTCT--GTTAGGATAGCC---

----ATGGATACCTTTCATCCAAAAAAAAAAAAATA--CTGACTTCGTTGTTTGATCATTTGATTTTAAAAGTTTACTGA

CCTAAGTAAATAATGTGAATTGTCACAGACCTATTCTTATCAAAAAACTTGCTTGAGAGAAATG------ATCAGTTAGG

GAAAACAATTTGAGGATGTGACATGTAGCCACTCTTCTAGATTAGGGGTCAGCAGATTTTTTTTTAT-ATAAAGTGCCAG

CAGTAAACTTTTAA---AGTTTTGTGAGTGTGCCA

**CCDC198**

>AluSx

--------------------------------------------------------TTTTTTTTTTTTTTTTTTTTTTTT

TTTT--------G---AG---ACGGAGTCTCGCTCT-GTCGCCCAGGCTGGAGTGCAGTGGCGCGATCTCGGCTCACTGC

AACCTCCGCCTCCCGGGTTCAAGCGATTCTCCTGCCTCAGCCTCCCGAGTAGCTGGGATTACAG---GC---GCGCGCCA

CCACGCCCGGCTAATTTTTGTATTTTTAGTAGAGACGGGGTTTCACCATGTTGGCCAGGCTGGTCTCGAACTCCTGACCT

CAGGTGATCCGCCCGCCTCGGCCTCCCAAAGTGCTGG------GATTACAGGCGTGAGCCACCGCGCCCGGCC-------

--------------------------------------------------------------------------------

--------------------------------------------------------------------------------

---------------

>Homo_sapiens

AGTGCCGTACAAA-TGTATG---GGAATATAGACAAAACTGA---AGAAGGATAGAATTGATGTCTT---TTTTTTTTTT

TTTT--------A---AG---ACAGAGTTTCGCTCCTGTTACCCAGGCTGGAGTGCAATGGCATGATCTCGGCTCACCGC

AAACTTCGCCTCCCAAGTTCAAATGATTCTCCTGCCTCAGCCTCCCGAGTAGCTGGGATTACAG---GT---GCCTGCCA

CCACGCCCAGCTAACTTTTGTATTTGTAGTAGAGACGAGGTTTCACCATGTTGGCCAAGCTGGTCTCGAACTCCTGACCT

CA--TGATCC---------------------------------GATTACAGGCATGAGCCACCGCGCCTGGCC---ACAA

TTGATGTCTT---ATAGTGAAAACAGTCATATGCTT--CAGGGATGTGTCACTTTGAATCCATTATTTTAATGTCAGCTT

CAAAATTCTGGTCTTATCTGGCCACCTGCAC--TCTTTCTATAAAGAATCTTGTTTTATTTTATTTTTTTA---TAGA-T

TTTATTTATTTATTT

>Pan_troglodytes

AGTGCCATACAAA-TGTATG---GGAATATAGACAAAACTGA---AGAAGGATAGAATTGATGTCTT---TTTTTTTTTT

TTT---------A---AG---ACAGAGTTTCGCTCTTGTTACCCAGGCTGGAGTGCAATGGCATGATCTCGGCTCACCGC

AAACTTCGCCTCCCAAGTTCAAATGATTCTCCTGCCTCAGCCTCCCGAGTAGCTGGGATTACAG---GT---GCCTGCCA

CCACGCCCAGCTAACTTTTGTATTTGTAGTAGAGACGAGGTTTCACCATGCTGGCCAAGCTGGTCTCGAACTTCTGACCT

CA--TGATCC---------------------------------GATTACAGGCATGAGCCACCGTGCCTGGCC---ACAA

TTGATGTCTT---ATAGTGAAAACAGTCATATGCTT--CAGGGATGTGTCACTTTGAATCCATTATTTTAATGTCAGCTT

CAAAATTCTGGTCTTATCTGGCCACCTGCAC--TCTTTCTATAAAGAATCTTGTTTTATTTTATTTTTT-A---TAGA-T

TTTATTTATTTATTT

>Gorilla_gorilla

AGTGCCGTACAAA-TGTATG---GGAATATAGACAAAACTGA---AGAAGGATGGAATTGATGTCTT---TTTTTTTTTT

TTTTTTT-----A---AG---ACAGAGTTTCGCTCTTGTTACCCAGGCTGGAGTGCAATGGCATGATCTCGGCTCACCGC

AAACTTCGCCTCCCAAGTTCAAATGATTCTCCTGCCTCAGCCTCTCGAGTAGCTGGGATTACAG---GT---GCCTGCCA

CCACGCCCAGCTAACTTTTGTATGTGTAGTAGAGACGAGGTTTCACCATGTTGGCCAAGCTGGTCTCGAACTCCTGACCT

CA--TGATCC---------------------------------GATTACAGGCATGAGCCACTGCGCCAGGCC---ACAA

TTGATGTCTT---ATAGTGAAAACAGTCATATGCTT--CAGGGATGTGTCACTTTGAATCCATTATTTTAATGTCAGCTT

CAAAATTCTGGTCTTATCTGGCCACCTGCAC--TCTTTCTATAAAGAATCTTGTTTTATTTT---TTTTTA---TAGA-T

TTTATTTATTTATTT

>Pongo_abelii

AATGCCATACAAA-TGTACG---GGAATATAGACAAAACTGA---AGAAGGATAGAATTGATGTCTT---TTTTTTTTTT

TTT---------A---AG---ACAGAGTTTCACTCTTGTTACCCAGGCTGGAGTACAATGGTATGATCTCGGCTCACCGC

AACCTTCACCTCCCAAGTTCAAATGATTCTCCTGCCTCAGCCTCCCGAGTAGCTGGGATTACAG---GT---GCCTGCCA

CCACGCCCAGCTAACTTTTGTATTTGTAGTAGAGACGGGGTTTCACCATGTTGGCCAAGCTGGTTTCGAACTCCTGACCT

CA--TGATCC---------------------------------GATTACAGGCATGAGCCACCGCGCCTGGCC---AGAA

TTGATGTCTT---ATAGTGAAAACAGTCATATGCTT--CAGGGGTGTGTCACTTTGAATCCATTATTTGAATGACAGCTT

CAAAATTCTGGTCTTATCTGGCCACCTGCAC--TCTTTCTATATAGAATCTTGTTTTGTTTTATTTTTTAA---TATAGC

TCTGTATGTGAAATT

>Colobus_angolensis

AGTACCATACAAA-TGTATG---GGAACATAGACAAAACTGA---AGAAGAATACAATCGATGTCTT---TTTCTTTTTT

TT----------A---AG---ATGGAGTTTCTCTCTTGTTGCCCAGGCTTTAGTGTAATGGTGTGATCTTGACTCACCGC

AACCCCTGCCTCCCAGGTTCAAATGATTCTCCGGCCTCAGCCTCCCAAGTAGCTGGGATTACAG---GC---ACCTGCCA

CCACGCCCAGCTAACTTTTGTATTTTTAGTAGAGACAGGGTTTCACCATGTTGGCCAAGCTGGTCTCAAAACTCTGACCT

CG--TGATCCACCGGCCTTGGCCTCCCATAGTGCTGGGATTGGGATTATAGGCAAGAGCAACCGCACCCGGCC---AGAA

TTGATGTCAT---ATGCAGAAAACAGTCATATGCTT--CAGTGATGTGTCACTTTGAATCCGTTATTTGAATGCCAGCTT

CAAAATTCTGGTCTTATCTGGCCACCTGCAC--TCTTTCTATAAAGAATCTTATTTTGTTTTATTCTTCAA---TATAGC

TCTGTATGTGAAATT

>Cercocebus_atys

AGTACCATACAAA-TGTATG---GGAATATAGACAAAACTGA---AGAAGAATATAATCGATGTCTT---TTTTTTTTTT

TTTTTTTTTTTTA---AG---ATGGAGTTTCTCTCTTGTTGCCCAGGCTGGAGTGTAATGGTGTGATCTTGACCCACCGC

AACCCCTGCCTCCCAGGTTCAAATGATTCTCCTGCCTCAGCCTCCCAAGTAGCTGGGATTACAG---GC---GCCTGCCA

CCACGCCCAGCTAACTTTTGTATTTTTAGTAGAGACAGGGTTTCACCATGTTGGCCAAGCTGGTCTGGAAACCCTGACCT

CG--TGATCCGCCGGCCTCGGCCTCCCATAGTGCTGGGATTGGGATTACAGGCATGAGCAACCACACCCGGCC---AGAA

TTGATGTCTT---ATGGTGAAAACAGTCATATGCTT--CAGGGATGTGTCACTTTGAATCCGTTATTTGAATGTCAGCTT

CAAAATTCTGGTCTTATCTGGCCACCTGCAC--TCTTTCTATAAAGAATCTTATTTTGTTTAATTTTTCAA---TATAGC

TCTGTATGTGAAATT

>Mandrillus_leucophaeus

AGTACCATACAAA-TGTATG---GGAATATAGACAAAACTGA---AGAAGAATATAATCGATGTCTT---TTTTTTTTTT

TTTTTT------A---AG---ATGGAGTTTCTTTCTTGTTGCCCAGGCTGGAATGTAATGGTATGATCTTGACTCACTGC

AACCCCTGCCTCCCAGGTTCAAATGATTCTCCTGCCTCAGCCTCCCAAGTAGCTGGGATTACAG---GC---GCCTGCCA

CCACGCCCAGCTAACTTTTGTATTTTTAGTAGAGACAGGGTTTCACCATGTTGGCCAAGCTGGTCTCCAAACCCTGACCT

TG--TGATCCGCCGGCCTCGGCCTCCCATAGTGCTGGGATTGGGATTACAGGCATGAGCAACCGCACCCGGCC---AGAA

TTGATGTTTT---ATAGTGAAAACAGTCATACGCTT--CAGGGATGTGTCACTTTGAATCCATTATTTGAATGTCAGCTT

CAAAATTCTGGTCTTATCTGGCCACCTGCAC--TCTTTCTATAAAGAATCTTATTTTGTTTTATTTTTCAA---TATAGC

TCTGTATGTGAAATT

>Macaca_nemestrina

AGTACCATACAAA-TGTATG---GGAATATAGACAAAACTGA---AGAAGAGTATAATCGATGTCTT---TTTTTTTTTT

TTTTTTTTT---A---AG---ATGGAGTTTCTCTCTTGTTGCCCAGGCTGGAGTGTAATGGTGTGATCTCGACCCACCAC

AACCCCTGCCTCCCAGGTTCAAATGATTCTCCTGCCTCAGACTCCCAACTAGCTGGGATTACAG---GC---GCCTGCCA

CCACGCCCAGCTAACTTTTGTATTTTCAGTAGAGACAGGGTTTCACCATGTTGGCCAAGCTGGTCTGGAAACCCTGACCT

CG--TGATCCGCCGGCCTCGGCCTCCCATAGTGCTGGGATTGGGATTACAGGCATGAGCAACCGCACCCGGCC---AGAA

TTGATGTCTT---ATAGTGAAAACAGTCATATGCTT--CAGGGATGTGTCACTTTGAATCCGTTATTTGAATGTCAGCTT

CAAAATTCTGGTCTTATCTGGCCACCTGCAC--TCTTTCTATAAAGAATCTTATTTTGTTTTATTTTTCAA---TATAGC

TCTGTATGTGAAATT

>Nasalis_larvatus

AGTACAATACAAA-TGTATG---GGAATATAGACAAAACTGA---AGAAGAATATAATCGATGTCTT---TTTCTTTTTT

TT----------A---AG---ATGGAGTTTCTCTCTTGTTGCCCAGGCTGGAGTGTAATGGTGTGATCTTGACTCACCGC

AACCCCTGCCTCCCAGGTTCAAATGATTCTCCGGCCTCAGCCTCCCAAGTAGCTGGGATTACAG---GC---ATCTGCCA

CCACGCCCGGCTAACTTTTGTATTTTTAGTAGAGACAGGGTTTCACCATGTTGGCCAAGCTGGTCTCGAAACCCTGACCT

CG--TGATCCACCGGCCTCAGCCTCCCATAGTGCTGGGATTGGGATTACAGGCATGAGCAACCGCACCCGGTC---AGAA

TTGATGTCTT---ATAATGAAAACAGTCATATGCTT--CAGTGATGTGTCACTTTGAATCCGTTATTTGAATGCCAGCTT

CAAAATTCTGGTCTTATCTGGCCACCTGCAC--TCTTTCTATAAAGAATCTTATTTTGTTTTATTTTTCAA---TATAGC

TCTGTATGTGAAATT

>Pygathrix_nemaeus

AGTACCATACAAA-TGTATG---GGAATATAGACAAAACTGA---AGAAGAATATAATCGATGTCTT---TTTCTTTTTT

TT----------A---AG---ATGGAGTTTCTCTCTTGTTGCCCAGGCTGTAGTGTAATGGTGTGATCTTGACTCACCGC

AACCCCTGCCTCCCAGGTTCAAATGATTCTCCGACCTCAGCCTCCCAAGTAGCTGGGATTACAG---GC---ACCTGCCA

CCATGCCATGCTAACTTTTGTATTTTTAGTAGAGACAGGGTTTCACCATGTTGGCCAAGCTGGTCTCGAAACCCTGACCT

CG--TGATCCGCCGGCCTCGGCCTCCCATAGTGCTGGGATTGGGATTACAGGCATGAGCAACCGCACCCGGTC---AGAA

TTGATGTCTT---ATAGTGAAAACAGTCATATGCTT--CAGTGATGTGTCACTTTGAATCCGTTATTTGAATGCCAGCTT

CAAAATTCTGGTCTTATCTGGCCACCTGCAC--TCTTTCTATAAAGAATCTTATTTTGTTTTATTTTTCAA---TATAGC

TCTGTATGTGAAATT

>Piliocolobus_tephrosceles

AGTACCATACAAA-TGTATG---GGAACATAGACAAAACTGA---AGAAGAATATAATCGATGTCTT---TTTCTTTTTT

TT----------A---AG---ATGGAGTTTCTCTCTTGTTGCCCAGGCTGGAGTGTAATGGTGTGATCTTGACTCACTGC

AACCCCTGCCTCCCAGGTTCAAATGATTCTCCGGCCTCAGCCTCCCAAGTAGCTGGGATTACAG---GC---ACCTGCCA

CCACGCCCAGCTAACTTTTGTATTTTTAGTAGAGACAGGGTTTCACCATGTTGGCCAAGCTGGTCTCAAAACCCTGACCT

CG--TGATCCACCGGCCTTGGCCTCCCATAGTGCTGGGATTGGGATTACAGGCATGAGCAACCGCACCCGGCC---AGAA

TTGATGTCTT---ATAGTGAAAACAGTCATATGCTT--CAGTGATGTGTCACTTTGAATCCGTTATTTGAATGCCAGCTT

CAAAATTCTGGTCTTATCTGGCCACCTGCAC--TCTTCCTATAAAGAATCTTATTTTGTTTTATTCTTCAA---TATAGC

TCTGTATGTGAAATT

>Macaca_mulatta

AGTACCATACAAAGTGTATG---GGAATATAGACAAAACTGA---AGAANNNNNNNNNNNNNNNNN--------------

------------N---NN---ATGGAGTTTCTC-CTTGTTGCCCAGGCTGGAGTGTAATGGTGTGATCTCGACCCACCGC

AACCCCTGCCTCCCAGGTTCAAATGATTCTCCTGCCTCAGCCTCCCAAGTAGCTGGGATTACAG---GC---GCCTGCCA

CCACGCCCAGCTAACTTTTGTATTTTCAGTAGAGACAGGGTTTCACCATGTTGGCCAAGCTGGTCTGGAAACCCTGACCT

CG--TGATCTGCCGGCCTCGGCCTCCCATAGTGCTGGGATTGGGATTACAGGCATGAGCAACCGCACCCGGCC---AGAA

TTGATGTCTT---ATAGTGAAAACAGTCATATGCTT--CAGGGATGTGTCACTTTGAATCCGTTATTTGAATGTCAGCTT

CAAAATTCTGGTCTTATCTGGCCACCTGCAC--TCTTTCTATAAAGAATCTTATTTTGTTTTATTTTTCAA---TATAGC

TCTGTATGTGAAATT

>Rhinopithecus_roxellana

AATACCATACAAA-TGTATG---GGAATATAGACAAAACTGA---AGAAGAATATAATCGATGTCTT---TTTCTTTTTT

TT----------A---AG---ATGGAGTTTCTCTCTTGTTGCCCAGGCTGGAGTGTGATGGTGTGATCTTGACTCACCAC

AACCCCTGCCTCCCAGGTTCAAATGATTCTCCGGCCTCAGCCTCCCAAGTAGCTGGGATTACAG---GC---ACCCGCCA

CCACGCCCGGCTAACTTTTGTATTTTTAGTAGAGACAGGGTTTCACCGTGTTGGCCAAGCTGGTCTCGAAACCCTGACCT

CG--TGATCCGCCGGCCTCAGCCTCCCATAGTGCTGGGATTGGGATTACAGGCATGAGCAACCGCACCCGGTC---AGAA

TTGATGTCTT---ATAGTGAAAACAGTCATATGCTT--CAGTGATGTGTCACTTTGAATCCGTTATTTGAATGCCAGCTT

CAAAATTCTGGTCTTATCTGGCCACCTGCAC--TCTTTCTATAAAGAATCTTATTTTGTTTTATTTTTCAA---TATAGC

TCTGTATGTGAAATT

>Semnopithecus_entellus

AGTACCATACAAA-TGTATG---GGAATATAGACAAAACTGA---AGAAGAATATAATCGATGTCTT---TTTCTTTTTT

TT----------A---AG---ATGGAGTTTCTCTCTTGTTGCCCAGGCTGGAGTGTAATGGTGTGATCTTGACTCACCGC

AACCCCTGCCTCCCAGGTTCAAATGATTCTCTGGCCTCAGCCTCCCAAGTAGCTGGGATTACAG---GC---ACCTACCA

CCACACCCAGCTAACTTTTGTATTTTTAGTAGAGACAGGGTTTCACCATGTTGGCCAAGCTGGTCTCGAAACCCTGACCT

CG--TGATCCGCCGGCCTTGGCCTCCCATAGTGCTGGGAATGGGATTACAGGCATGAGCAACCGCACCCGGCC---AGAA

TTGATGTCTT---ATAGTGAAAACAGTCATATGCTT--CAGTGATGTGTCACTTTGAATCCGTTATTTGAATGCCAGCTT

CAAAATTCTGGTCTTATCTGGCCACCTGCAC--TCTTTCTATAAAGAATCTTATTTTGTTTTATTTTTCAA---TATAGC

TCTGTATGTGAAATT

>Theropithecus_gelada

AGTACCATACAAA-TGTATG---GGAATATAGACAAAACTGA---AGAAGAATATAATCGATGTCTT---TTTTTTTTTT

TTTTTT------A---AG---ATGGAGTTTCTCTCTTGTTGCCCAGGCTGGAGTGTAATGGTGTGATCTTGACCCACCGC

AACCC------------------TGATTCTCCTGCCTCAGCCTCCCAAGTAGCTGGGATTACAG---GC---GCCTGCCA

CCACGCCCAGCTAACTTTTGTATTTTTAGTAGAGACAGGGTTTCACCACGTTGGCCAAGCTGGTCTGGAAACCCTGACCT

TG--TGATCCGCTGGCCTCGGCCTCCCATAGTGCTGGGATTGGGATTACAGGCATGAGCAACCGCACCCGGCC---AGAA

TTGATGTCTT---ATGGTGAAAACAGTCATATGCTT--CAGGGATGTGTCACTTTGAATCCGTTATTTGAATGTCAGCTT

CAAAATTCTGGTCTTATCTGGCCACCTGCAC--TCTTTCTATAAAGAATCTTATTTTGTTTTATTTTTCAA---TATAGC

TCTGTATGTGAAATT

>Ateles_geoffroyi

AGTGTCATACAAA-TGTAAG---GGAAAATAGACAAAAC-AA---AGAAGGATAGAACTGATGTCTT-------------

--------------------------------------------------------------------------------

--------------------------------------------------------------------------------

--------------------------------------------------------------------------------

--------------------------------------------------------------------------------

-------------ATAGTGAAAACACTCAT--GCTT--CAGGGATGTATCACTCTGAATCCATTATGTGAATGTCACCTT

CAAAATTCTGGTCTTATCTGGCCACCTGCTCCATCTTTCTATAAAGAATC-------GTTTTATTTTTTAA---TATAGC

TCTGCATGTGAAATT

>Aotus_nancymaae

AGTGCCATACTAA-TGTAAG---GGAATATAGACAAAACTGA---AAAAGGATAGAATTGATGTCTT-------------

--------------------------------------------------------------------------------

--------------------------------------------------------------------------------

--------------------------------------------------------------------------------

--------------------------------------------------------------------------------

-------------ATAGTGAAAACACTCATATGCTT--CAGGGACGTGTCACTCTGAATCCATTATTTGAATGTCACCTT

CAAAATTCTGGTCTTATCTGGCCACCTGCACCATCTTTCTATAAAGAATCTTGTTTTATTTT----TTTAA---TATAGC

TCTGAATGTGAAATT

>Alouatta_palliata

AGTGCCATACAAA-TGTAAG---GGAATATAGACAAAAC-AA---AGAAGGATAGAATTTATGTTTT-------------

--------------------------------------------------------------------------------

--------------------------------------------------------------------------------

--------------------------------------------------------------------------------

--------------------------------------------------------------------------------

-------------ATAGTGAAAACACGCAC--GCTT--CAGGGATGTATCACTCTGAATCCATTATGTGAATGTCACCTT

CAAAATTCTGGTCTTATCTGGCCACCTGCTCCATCTTTCTATAAAGAATCTTGTTTTGTTTTATTTTTTAA---TGTAGC

TCTGAATGTGAAATT

>Cebus_albifrons

AGTGCCATACAAA-TGTAAG---GGAATAAAGACAAAACTGA---AGAAGGATAAAATTGATGTTTT-------------

--------------------------------------------------------------------------------

--------------------------------------------------------------------------------

--------------------------------------------------------------------------------

--------------------------------------------------------------------------------

-------------ATAGTGAAAACACTCATATGCTT--TGGGGATGTGTTACTCTGAATCCATTATTTGAATGTCACCTT

CAAAATTCTGGTCTTATCTGGCCACCTGCACCATCTTTCTATAAAGAATCTTGTTTTGTTTTATTTTTTAA---TGTAGC

TCTGAATGTGAAATT

>Cebus_capucinus_imitator

NNNNNNNNNNNNN-NGTAAG---GGAATAAAGACAAAACTGA---AGAAGGATAGAGTTGATGTTTT-------------

--------------------------------------------------------------------------------

--------------------------------------------------------------------------------

--------------------------------------------------------------------------------

--------------------------------------------------------------------------------

-------------ATAGTGAAAACACTCATATGCTT--TGGGGATGTGTTACTCTGAATCCATTATTTGAATGTCACCTT

CAAAATTCTGGTCTTATCTGGCCACCTGCACCATCTTTCTATAAAGAATCTTGTTTTGTTTTATTTTTTAA---TGTAGC

TCTGAATGTGAAATT

>Callithrix_jacchus

AGTGCCATACAAA-TGTAAG---GGAATATAGACAAAACTGA---AGAAGGATAGAATTGATGTCTT-------------

--------------------------------------------------------------------------------

--------------------------------------------------------------------------------

--------------------------------------------------------------------------------

--------------------------------------------------------------------------------

-------------ATAGTGAAAACACTCATGTGCTT--CAGGGATGTGTCACTCTGAATCCATTATTTGAATGTCACCTT

CAAAATTCTGGTCTTATCTGACCACCTGCACCGTCTTTCTATAAAGAATCTTGTTCTGTTTTTTGTTT------TTTGGT

TTTTTTTGTTTTGTT

>Plecturocebus_donacophilus

CGTGCCATACAAA-TGTAAG---GGAATATAGACAAAACTGA---AGAAGGATAGAATTGATGTCTG-------------

--------------------------------------------------------------------------------

--------------------------------------------------------------------------------

--------------------------------------------------------------------------------

--------------------------------------------------------------------------------

-------------ATAGTGAAAACACTCATATGCT---CAGGGATGTGTCACTTTGAATCCATTATTTGAATGTCACCTT

CAAAATTCTGGTCTTATCTGGCCACCTGCACCATCTTTCTATAAAGAATCTTATTTTGTTTTATTTTTTAA---TAAAGC

TCTGAATGTGAAATT

>Pithecia_pithecia

AGTGCCGTACAAA-TGTAAG---GGAATATAGACAAAACTGA---AGAAGGATAGAATTGATGTCTT-------------

--------------------------------------------------------------------------------

--------------------------------------------------------------------------------

--------------------------------------------------------------------------------

--------------------------------------------------------------------------------

-------------ATAGTGAAAACACTCATATGCTT--CAGGGATGTGTCACTCTGAATCCATTATTTGAATGTCACCTT

CAAAATTCTGGTCTTATCTGACCACCTACACCATCTTTCTATAAAGAATCTTGTTTTGTTTTATTTTTTAA---TGTAGC

TCTGAATGTGAAATT

>Saimiri_boliviensis

AGTGCTATACAAA-TGTAAG---GGAACATAGACAAATCTGA---AGAAGGATAGAATTGATGTTTT-------------

--------------------------------------------------------------------------------

--------------------------------------------------------------------------------

--------------------------------------------------------------------------------

--------------------------------------------------------------------------------

-------------ATAGTGAAAACCCTCATATGCTT--TGGGGATGTGTCACTCTGCATCCATTATTTAAATGTCACCTT

CAAAATTCTGGTCTTATCTGGCCACCTGCACCGTCTTTCTATAAAGAATCTTGTTTTGTTTTATTTTTTAA---TATAGC

TCTGAATGTGAAATT

>Saguinus_imperator

AGTACCATACAAA-TGTAAG---GGAATATAGACAAAACTGA---AGAAGGATAGAATTGATGTCTT-------------

--------------------------------------------------------------------------------

--------------------------------------------------------------------------------

--------------------------------------------------------------------------------

--------------------------------------------------------------------------------

-------------ATAGTGAAAACACTCATATGCTT--CAGGAATGTGTCACTCTGAATCCATTATTTGAATGTTACCTT

CAAAATTCTGGTCTTATCTGACCACCTGCACTGTCTTTCTATAAAGAATCTTGTTCTGTTTTATTTTTTAA---TATAGC

TCTGAATGTGAGATT

>Daubentonia_madagascariensis

AGAGCCATAGGAA-TGTATGATGGGAATATGGACAAAACTGA---AGAAGGATGGAATTGATGTCTT-------------

--------------------------------------------------------------------------------

--------------------------------------------------------------------------------

--------------------------------------------------------------------------------

--------------------------------------------------------------------------------

-------------ATAGTGAAGACAACCATATGCTTTTCAGGGACGTGTCACCCTAAATCCATCATTTAAATGTCACCTT

CACAATTCTGTTCTCATCTGGCCACCTGCAATAGTTTTCTACAAAATATCTTGTTTTGTTCTGTTTTTTTAAA-TATAAC

TTTGTCTGTGAAATA

>Eulemur_fulvus

AGTACCATAGAAA-TGTATG---GGAATATGAACAAAACTGA---AGAAGAATGGAATTGATGTCAT-------------

--------------------------------------------------------------------------------

--------------------------------------------------------------------------------

--------------------------------------------------------------------------------

--------------------------------------------------------------------------------

-------------ATAGTGAAAACAACCATATGCTT--CAGGGAAGGGTCACCCTAAATCTATCATTTAAATGTCACCTT

CATAATTCTGGTCGTATCTGGCCACCTGCACTAGTTTTCTATAAAATATCTTGTTTTGTTCTGCTTTTTAAAAATATACC

TTTGTCTGTGAAATA

>Eulemur_macaco

AGTACCATAGAAA-TGTATG---GGAATATGAACAAAACTGA---AGAAGGATTGAATTGATGTCAT-------------

--------------------------------------------------------------------------------

--------------------------------------------------------------------------------

--------------------------------------------------------------------------------

--------------------------------------------------------------------------------

-------------ATAGTGAAAACAACCATATGCTT--CAGGGAAGGGTCATCCTAAATCTATCATTTAAATGTCACCTT

CATAATTCTGGTCGTATCTGGCCACCTGCACTAGTTTTCTATAAAATATCTTGTTTTGTTCTGCTTTTTAAAAATATACC

TTTGTCTGTGAAATA

>Indri_indri

AGTGCCCTAGAAA-TGCATT---GGAATATGGACAAAACTGA---AGAAGGATGGAATTGATGTCTT-------------

--------------------------------------------------------------------------------

--------------------------------------------------------------------------------

--------------------------------------------------------------------------------

--------------------------------------------------------------------------------

-------------ATAGTGAAAACAACCGTTTGCTT--CAG---AGGGTCACCCTAAATTCATCACTTAAATTTCACCTT

CACAATTCTGGTCTTATCTGGCCACCTGCACTAGTTTTCTATAAAATATCTTGTTTTGTTCTGTTTTTTAAAA-TATACC

TTTGTCTGTGAAATA

>Lemur_catta

AGTACCATAGAAA-TGTATG---GGAATATGGACAAAACTGA---AGAAGGATGGAATTGATGTCAT-------------

--------------------------------------------------------------------------------

--------------------------------------------------------------------------------

--------------------------------------------------------------------------------

--------------------------------------------------------------------------------

-------------ATAGGGAAAACAACCATATGCTT--CAGGGAAGGGTCACCCTAAATCCATCATTTAAATGTCACCTT

CACAATTCTGGTCGTATCTGGCCACCTGCACTAGTTTTCTATAAAATATCTTGTTTTGTTCTGTTTTTTAAAA-TATACC

TTTGT----GAAATA

>Mirza_coquereli

AGTGCCAGAGAAA-TGTATG---GGACTATGGACAAAACTGA---AGAAGGATGGAATTGATGTCGT-------------

--------------------------------------------------------------------------------

--------------------------------------------------------------------------------

--------------------------------------------------------------------------------

--------------------------------------------------------------------------------

-------------ATAGTGAAAACAACCGTATGCTT--CAGGGAAGGGTCACCCTAAATCCATCATTTAAATGTCACCTT

CACAATTCTGGTCTTATCTGGCCACCTGAACTAATTTTCTATAAAATATCTTGTTTTGTTCTGTTTTTTTAAA-TACACC

TTTGT----GAAATA

>Microcebus_murinus

AGTGCCAGAGAAA-TGTATA---GGACTATGGACAAAACTGA---AGAAGGATGGAATTGATGTCAT-------------

--------------------------------------------------------------------------------

--------------------------------------------------------------------------------

--------------------------------------------------------------------------------

--------------------------------------------------------------------------------

-------------ATAGTGAAAACAACTGTATGCTT--CAGGGAAGGGTCACCCTAAATCCATCATTTAAATGTCACCTT

CACAATTCTGGTCTTATCTGGCCACCTGAACTAGTTTTCTATAAAATATCTTGTTGTGTTCTGTTTTTTAAAA-TATACC

TTTGT----GAAATA

>Prolemur_simus

AGTAC-ATAGAAA-TGTATG---GGAATATGGACAAAACTGA---AGAAGGATGGAATTGATGTCAC-------------

--------------------------------------------------------------------------------

--------------------------------------------------------------------------------

--------------------------------------------------------------------------------

--------------------------------------------------------------------------------

-------------ATAGTGAAAACAACCATATGCTT--CAGGGAAGGGTCACCCTAAATCCATCATTTAAATGTCACCTT

CACAATTCTGGTTGTAACTGGCCACCTGCACTAGTTTTCTATAAAATATCTTGTTTTGTTCTGTTTTTTAAAA-TATACC

TTTGT----GAAATA

**BIRC5**

>AluY

--------------------------------------------------------------------------------

--------------------------------------------------------------------------------

--------------------------------------------------------------------------------

-----------------------------------GGCCGGGCGCGGTGGCTCACGCCTGTAATCCCAGCACTTTGGGAG

GCCGAGGCGGGCGGATCACGAG---GT---CAGGAGATCGAGACCATCCTGGCTAACACGGTGAAACCCCGTCTCTACT-

----AAAAATAC-AAAAAATTAGCCGGGCGTGGTGGCGGGCGCCTGTAGTCCCAGCTACTCGGGAGGCTGAGGCAGGAGA

ATGGCGTGAACCCGGGAGGCGGAGCTTGCAGTGAGCCGAGATCGCGCCACTGCACTCCAGCCTGGGCGACAGAGCGAGAC

TCCGTCTCAAAAAAAAAAAAAAAAAAAAAAAAAAAA--------------------------------------------

--------------------------------------------------------------------------------

--------------------------------------------------------------------------------

--------------------------------------------------------------------------------

--------------------------------------------------------------------------------

--------------------------------------------------------------------------------

--------------------------------------------------------------------------------

---

>Homo_sapiens

ATATTTTCAGATTAGAGTT-ACAACTGGCTGTCTTTTTGGACTTTGTGTGGCCATGTTTTCATT----------------

-------------------------------------------------GTAATGCAGTTCTGGTAACGGTGATAGTCAG

TTATACAGGGAGACTCCCCTAGCAGAAAATGAGAGTGTGAGCTAG-GGGGTCCCTTGGGGAACCCGGGGCAATAATGCCC

TTCTCTGCCCTT---AATCCTTAC---AG---TG-GGCCGGGCACGGTGGCTTACGCCTGTAATACCAGCACTTTGGGAG

GCCGAGGCGGGCGGATCACGAG---GT---CAGGAGATCGAGACCATCTTGGCTAATACGGTGAAACCCCGTCTCCACT-

----AAAAATAC-AAAAAATTAGCCGGGCGTGGTGGTGGGCGCCTGTAGTCCCAGCTACTCGGGAGGCTGAGGCAGGAGA

ATGGCGTGAACCCAGGAGGCGGAGCTTGCAGTGAGCCGAGATTGCACCACTGCACTCCAGCCTGGGCGACAGAATGAGAC

TCCGTCT-CAAAAAAAAAAAAAAAAGA-----AAAA---AATCTTTACAGTG---GATTACATAACAATTCCAGTGAAAT

GAAATTACTTCAAACAGTTCCTTGAGAA-TGTTGGAGGGATTTGACATGTAATTCCTTTGGACAT-ATACCATGTAACAC

TTTTCCAACTAATTGCTAAGGAAGTCCAGATAAAATAGATACATTAGCCACACAGATGTGGGGGGAGATGTCCACAGGGA

GAGAG------------AAGGTGCTAAGAGGTGCCATATGGGAATGTGGCTT-GGGCAAAGCACTGATGCCATCAACTTC

AGACTTGACGTCTTACTCCTGAGGCAG----AGCAGGGTGTGCCTGTGGAGGGCGTGGGGAG-GTGG-CCCGTGGGGAGT

GGACTGCCGC-TTTAATCCCTTCAGCTGCCTTTC----------CGCTGTTGTTTTGATTTTTCTAGAGAGGAACATAAA

AAGCATTCGTCCGGTTGCGCTTTCCTTTCTGTCAAGAAGCAGTTTGAAGAATTAACCCTTGGTGAATTTTTGAAACTGGA

CAG

>Pan_troglodytes

ATATTTTCAGATTAGAGTT-ACAACTGGCTGTCTTTTTGGACTTTGTGTGGCCATGTTTTCATT----------------

-------------------------------------------------GTAATGCAGTTCTGGTAACGGTGATAGTCAG

TTATGCAGGGAGACTCCCCTAGCAGAAAATGAGAGTGTGAGCTAG-GGGGTCCCTTGGGGAACCCGGGGCAATAATGCCC

TTCTCTGCCCTT---AATCCTTAC---AG---TG-GGCCGGGCGCGGTGGCTCACGCCTGTAATACCAGCACTTTGGGAG

GCCGAGGCGGGCGGATCACGAG---GT---CAGGAGATCGAGACCATCCTGGCTAATACGGTGAAACCCCGTTTCCACT-

----AAAAATAC-AAAAAATTAGCCGGGCGTGGTGGCGGGCGCCTGTAGTCCCAGCTACTCGGGAGGCTGAGGCAGGAGA

ATGGCGTGAACCCAGGAGGCGGAGCTTGCAGTGAGCCGAGATTGCACCACTGCACTCCAGCCTGGGCGACAGAACGAGAC

TCCGTCT-CAAAAAAAAAAAAAAAAAGAAAAGAAAA---AATCTTTACAGTG---GATTACATAACAATTCCAGTGAAAT

AAAATTACTTCAAACAGTTCCTTGAGAA-TGTTGGAGGGATTTGACATGTAATTCCTTTGGACGT-ATACCATGTAACGC

TTTTCCAACTAATTGCTAAGGAAGTCCAGATAAAATAGATACATTAGCCACACAGATGTGGGGGGAGATGTCCACAGGGA

GAGAG------------AAGGTGCTAAGAGGTGCCATATGGGAATGTGGCTT-GGGCAAAGCACTGATGCCATCAACTTC

AGACTTGACATCTTACTCCTGAGGCAG----AGCAGGGTGTGCCTGTGGAGGGCGTGGGGAG-GTGG-CCCGTGGGGAGT

GGACTGCCGC-TTTAATCCCTTCAGCTGCCTTTC----------CGCTGTTGTTTTGATTTTTCTAGAGAGGAACATAAA

AAGCATTCGTCCGGTTGCGCTTTCCTTTCTGTCAAGAAGCAGTTTGAAGAATTAACCCTTGGTGAATTTTTGAAACTGGA

CAG

>Pan_paniscus

ATATTTTCAGATTAGAGTT-ACAACTGGCTGTCTTTTTGGACTTTGTGTGGCCATGTTTTCATT----------------

-------------------------------------------------GTAATGCAGTTCTGGTAACGGTGATAGTCAG

TTATGCAGGGAGACTCCCCTAGCAGAAAATGAGAGTGTGAGCTAG-GGGGTCCCTTGGGGAACCCGGGGCAATAATGCCC

TTCTCTGCCCTT---AATCCTTAC---AG---TG-GGCCGGGCGCGGTGGCTCACGCCTGTAATACCAGCACTTTGGGAG

GCCGAGGCGGGCGGATCACGAG---GT---CAGGAGATCGAGACCATCCTGGCTAATACGGTGAAACCCCGTCTCCACT-

----AAAAATAC-AAAAAATTAGCCGGGCGTGGTGGCGGGCGCCTGTAGTCCCAGCTACTCAGGAGGCTGAGGCAGGAGA

ATGGCGTGAACCCAGGAGGCGGAGCTTGCAGTGAGCCGAGATTGCACCACTGCACTCCAGCCTGGGCGACAGAACGAGAC

TCCGTCTACAAAAAAAAAAAAAAAAAG------AAA---AATCTTTACAGTG---GATTACATAACAATTCCAGTGAAAT

GAAATTACTTCAAACAGTTCCTTGAGAA-TGTTGGAGGGATTTGACATGTAATTCCTTTGGACAT-ATACCATGTAACGC

TTTTCCAACTAATTGCTAAGGAAGTCCAGATAAAATAGATACATTAGCCACACAGATGTGGGGGGAGATGTCCACAGGGA

GAGAG------------AAGTTGCTAAGAGGTGCCATATGGGAATGTGGCTT-GGGCAAAGCACTGATGCCATCAACTTC

AGACTTGACATCTTACTCCTGAGGCAG----AGCAGGGTGTGCCTGTGGAGGGCGTGGGGAG-GTGG-CCCGTGGGGAGT

GGACTGCCGC-TTTAATCCCTTCAGCTGCCTTTC----------CGCTGTTGTTTTGATTTTTCTAGAGAGGAACATAAA

AAGCATTCGTCCGGTTGCGCTTTCCTTTCTGTCAAGAAGCAGTTTGAAGAATTAACCCTTGGTGAATTTTTGAAACTGGA

CAG

>Gorilla_gorilla

ATATTTTCAGATTAGAGTT-ACAACTGGCTGTCTTTTTGGACTTTGTGTGGCCATGTTTTCATT----------------

-------------------------------------------------GTAATGCAGTTCTGGTAACGGTGATAGTCAG

TTATGCAGGGAGACTCCCCTAGCAGAAAATGAGAGTGTGAGCTAG-GGGGTCCCTTGGGGAACCTGGGGCAATAATGCCC

TTCTCTGCCCTT---AATCCTTAC---AG---TG-GGCCGGGCGCGGTGGCTCACGCCGGTAATACCAGCACTTTGGGAG

GCCGAGGCGGGCGGATCATGAG---GT---CAGGAGATCGAGACCATCCTGGCTAATACGGTGAAACCCCGTCTCCACT-

----AAAAATAC-AAAAAATTAGCCGGGCGTGGTGGCGGGCGCCTGTAGTCCCAGCTACTCGGGAGGCTGAGGCAGGAGA

ATGGCGTGAACCCAGGAGGCGGAGCTTGCAGTGAGCCGAGATTGCGCCACTGCACTCCAGCCTGGGCGACAGAATGAGAC

TCCGTCT-CAAAAAAAAAAAAAAAAAA--AAGAAAA---AATCTTTACAGTG---GATTACATAACAATTCCAGTGAAAT

GAAATTACTTCAAACAGTTCCTTGAGAA-TGTTGGAGGGATTTGACATGTAATTCCTTTGGACGT-ATACCATGTAACAC

TTTTCCAACTAATTGCTAAGGAAGTCCAGATAAAATAGATACATTAGCCACACAGATGTGGGGGGAGATGTCCACAGGGA

GAGAG------------AAGGTGCTAAGAGGTGCCATATGGGAATGTGGCTT-GGGCAAAGCACTGATGCCATCAACTTC

AGACTTGACGTCTTACTCCTGAGGCAG----AGCAGGGTGTGCCTGTGGAGGGCGTGGGGAG-GTGG-CCCGTGGGGAGT

GGACTGCCGC-TTTAATCCCTTCAGCTGCCTTTC----------CGCTGTTGTTTTGATTTTTCTAGAGAGGAACATAAA

AAGCATTCATCCGGTTGCGCTTTCCTTTCTGTCAAGAAGCAGTTTGAAGAATTAACCCTTGGTGAATTTTTGAAACTGGA

CAG

>Pongo_abelii

ATATTTTCAGATTAGAGTT-ACAACTGGCTGTCCTTTTGGACTTTGTGGGGCCATGTTTTCATT----------------

-------------------------------------------------GTAATACAGTTCTGGTAATGGTGATAATCAG

TTATGCAGGGAGACTCCCCTAGCAGAAAATGAAAGTATGAGCTAG-GGGGTCACTTGGGGAACCCTGGGCAATAATGCCT

TTCTCTGCCCTT---AATCCTTAC---AG-N-TG-GGCCAGGCGTAGTGGCTCACGTCTGTAATCCCAGCACTGTGGGAG

GCTGAGGCGGGCAGATCACGAG---GT---CAGGTGATCGAGACCATCCTGGCTAACATGGTGAAACCCCGTCTCTACTA

AAAAAAAAATAG-AAAAAATTAGCTGGGCGTGGTGGCGGGTGCCTGTAGTCCCAGCTACTCGAGAGGCTGAGGCAGGAGA

ATGGTGTGAACCCAGGAGGCGGAGCTTGCAGTGAGCAGAGATCACGCCACTGCACTCCAGCCTGGGCGACAGAGCGAGAC

TCCATCT-CAGGAAAAAAAA-------------AAA---AATCCTTACAGTG---GATTACATAACAATTCCAGTGAAAT

GAAATTACTTCAAACAGTTCCTTGAGAA-TGTTGGAGGGATTTGACATGTAATTCCTTTGGATGT-ATACCATGTAACAT

TTTTCCAACTAATTGCTAAAGAAGTCCAGATAAAATAGATACATTAGCCACACAGATGTGGGGGGAGATGTCCATAGGGA

GAGAG------------AAGGTGCTAAGAGGTGCAATATGGGAATGTGGCTT-GGGCAAAGCACTGATGCCATCAACTTC

AGACTTGACGTCTTACTCCTGAGGCAG----AGCAGGGTGTTCCTGTGGAGGGCGTGGGAAG-GTGG-CCCGTGGGGAGT

GGACTGCCGC-TTTAATCCCTTCAGCTGCCTTTC----------CGC---TGTTTTGATTTTTCTAGAGAGGAACATAAA

AAGCATTCGTCCGGTTGCGCTTTCCTTTCTGTCAAGAAGCAGTTTGAAGAATTAACCCTTGGTGAATTTTTGAAACTGGA

CAG

>Nomascus_leucogenys

ATATTTTCAGATTAGAGTT-ACAACTGGCTGTCCTTTTGGACTTTGTGTGGCCGTGTTTTCATT----------------

-------------------------------------------------GTAATACGGTTCTGGTAACAGTGATAATCAG

TTATGCAGGGAGACTCCCCTAGCAGAAAATG--AGTATGAGCT---GGGGTCCCTTGGGGAACCCTGGGCAATAATGCCC

TTCTCTGCCCTT---AATCCTTAC---AG---TG-GGCCGGGCGCGGTGGCTCACGCCTGTAATCCTAGCACTTTGGGAG

GCCGAGGTGGGCGGATCATGAG---GT---CAGGAGATCGAGACCATCCTAGCTAACACGGTGAAACCCCGTCTCTACT-

----AAAAATACAAAAAAATTAGCCGGGCGTGGCAGCAGGCGCCTGTAGTCCCAACTACTGGGGAGGCTGAAGCAGGAGA

ATGGCGTGAACCCAGGAGGCGTAGCTTGCATTGAGTAGAGATCACGCCACTGCACTCCAGCCTGGGCGACAGAGCGAGAC

TCCGTCT-CAGAAAAAAAAAAAAA---------AAA---AATCCTTACAGTG---GATTACATAACAATTCCAGTGAAAT

GAAATGACTTCAAACAGCTCCTTGAGAA-TGTTGGAGGGATTTGACATGTAATTCCTTTGGACAT-ATACCATGTAACAC

TTTTCCAACTAATTGCTAAAGAAGTCCAGATGAAATGGATACATTAGCCACACAGATGTGGGGGGAGATGTCCAGAGGGA

GAGAG------------AAGGCGCTAAGAGGTGCCATATGGGAATGTGGCTT-GGGCAAAGCACTGATGCCATCAACTTC

AGACTTGATGTCTTACTCCTGAGGCAG----AGCAGGGTGTGCCTGTGGAGGGCGTGGGGAG-GTGG-CCCATGGGGAGT

GGACTGCCTC-TTTAATCCCTTCAGCTACCTTTC----------CGCTGTTGTTTTGATTTTTCTAGAGAGGAACATAAA

AAGCATTCGTCTGGTTGTGCTTTCCTTTCTGTCAAGAAGCAGTTTGAAGAATTAACCCTTGGTGAATTTTTGAAACTGGA

CAG

>Colobus_angolensis

ATATTTTCAGATTAGAGTT-ACAACTGGCTGTCCTTTTGGACTTTGGGTGGCCATGTTTTCATT----------------

-------------------------------------------------GTAATACAGTTCTGGTAACGGTGACAATCAG

CTATGCAGGGAGCCTCCCCTAGCAGGAAATGAAAGTATGAGCTAGAGGGGTCCCTTGGGGAACCCTGGGCAATAATGACC

TTCTCTGCCCTT--------------------------------------------------------------------

--------------------------------------------------------------------------------

--------------------------------------------------------------------------------

--------------------------------------------------------------------------------

---------------------------------------AATCCTTACAGTG---GATTGCATAACAATTCCAGTGAAAT

GAAATTACTTCAAACAGTTCCTTGAGAA-TGTTAGAGGGGTTTGACATGTAATTCCTTTGAACTT-ACACCATGTAACAC

TTTTCCAACTAAGTGCTAAAGAAGTCCAGATAAAATAGATACATTAGCCACACAGATGTCGGGGGAGACGTCCACAGGGA

G-GAG------------AAGGTGCTAGGAGGTGCCATCTGGGAATGTGGCTT-AGGCACAGCACGGATGCCATCAACTTC

AAACTTGATGTCTTGCTCCTGAGGCAG----AGCAGGGTGTGCCTGTGGAGGGCGCGGGGAG-GTGG-CCCGTTGGGAGT

GGACTGCCAC-TTTAATCCCTTCAACTGCTTTTC----------TGCTGTTGTTTTGATTTTTCTAGAGAGGAACATAAA

AAGCATTCATCCGGTTGCGCTTTCCTTTCTGTCAAGAAGCAGTTTGAAGAATTAACCCTCGGTGAATTTTTGAAACTGGA

CAG

>Cercopithecus_neglectus

ATATTTGCAGATTAGAGTT-ACAACTGGCTATCCTTTTGGACTTTGAGTGGCCATGTTTTCATT----------------

-------------------------------------------------GTAATACGGTTCTGGTAACGGTGATAATCAG

CTATGCAGGGAGACTCCCCTAGCAGGAAATGAGAGTATGAGCTAGAGGGGTCCCTTGGGGAACCCTGGGCAATAATGGCC

TTCTCTGCCCTT--------------------------------------------------------------------

--------------------------------------------------------------------------------

--------------------------------------------------------------------------------

--------------------------------------------------------------------------------

---------------------------------------AATCCTTAGGGTG---GATTACGTAACAGTTTCAGTGAAAT

GAAATTGCTTCAAACAGTTCCTTGAGAA-TGTTAGAGGGGTTTGACATGTAATTCCTTTGAACTT-ACACCATGTAACAC

TTTTCCAACTAACTGCTAAAGAAGTCCAGATAAAATAGATACATTAGCCACACAAATGTGGGGGGAGACGTCCACAGGGA

G-GAG------------AAGGTGCTAAGAGGTGCCATATGGGAATGTGACTT-GGGCACAGCACGGATGCCATCAACTTC

AGACTTGACGTCTTGCTCCCGAGGCAG----AGCAGGGTGTGCCTGTGGAGGGCGCGGGGAG-GTGG-CCCGTTGGGAGT

GGACTGCCAC-TTTAATCCCTTCAACTGCCTTTC----------CGCTGTTGTTTTGATTTTTCTAGAGAGGAACATAAA

AAGCATTCATCCGGTTGCGCTTTCCTTTCTGTCAAGAAGCAGTTTGAAGAATTAACCCTCGGTGAATTTTTGAAACTGGA

CAG

>Erythrocebus_patas

ATATTTGCAGATTAGAGTT-ACAACTGGCTATCTTTTTGGACTTTGAGTGGCCATGTTTTCATT----------------

-------------------------------------------------GTAATACAGTTCTGGTAACGGTGATAATCAG

CTATGCAGGGAGACTCCCCTAGCAGGAAATGAGAGTATGAGCTAGAGGGGTCCCTTGGGGAACCCTGGGCAATAATGGCC

TTCTCTGCCCTT--------------------------------------------------------------------

--------------------------------------------------------------------------------

--------------------------------------------------------------------------------

--------------------------------------------------------------------------------

---------------------------------------AATCCTTACAGTG---GATTACGTAACAATTTCAGTGAAAT

GAAATTGCTTC--ACAGTTCCTTGAGAA-TGTTAGAGGGGTTTGACATGTAATTCCTTTGAACTT-ACACCATGTAACAC

TTTTCCAACTAACTGCTAAAGAAGTCCAGATAAAATAGATACATTAGCCACACAGATGTCGGGGGAGACGTCCACAGGGA

G-GAG------------AAGGTGCTAAGAGGTGCCATATGGGAATGTGGCTT-GGGCACAGCACGGATGCCATCAACTTC

AGACTTGACGTCTTGCTCGTGAGGCAG----AGCAGAGTGTGCCTGTGGAGGGCGCGGGGAG-GTGG-CCCGTTGGGAGT

GGACTGCCAC-TTTAATCCCTTCAACTGCCTTTC----------CGC---TGTTTTGATTTTTCTAGAGAGGAACATAAA

AAGCATTCATCCGGTTGCGCTTTCCTTTCTGTCAAGAAGCAGTTTGAAGAATTAACCCTCGGTGAATTTTTGAAACTGGA

CAG

>Rhinopithecus_roxellana

ATATTTTCAGATTAGAGTT-ACAACTGGCTGTCCTTTTGGACTTTGGGTGGCCATGTTTTCATT----------------

-------------------------------------------------GTAATACAGTTCTGGTAACGGTGATAATCAG

CTATGCAGGGAGACTCCCCTAGCAGGAAATGAGAGTATGAGCTAGAGGGGTCCCTTGGGGAACCCTGGGCAATAATGCCT

TTCTCTGCCCTT--------------------------------------------------------------------

--------------------------------------------------------------------------------

--------------------------------------------------------------------------------

--------------------------------------------------------------------------------

---------------------------------------AATCCTTACAGTG---GATTACATAATAATTCCAGTGAAAT

GAAATTACTTCAAACAGTTCCTTGAGAA-TGTTAGAGGGGTTTGACATGTAATTCCTTTGAACTT-ACACCATGTAACGC

TTTTCCAACTAACTGCTAAAGAAGTCCAGATAAAATAGATACATTAGCCACACAGATGTGGGGGGAGATGTCCACAGGGA

G-GAG------------AAGGTGCTAAGAGGTGCCATATGGGAATGTGGCTT-GGGCACAGCACAGATGCCATCAACTTC

AGACTTGATGTCTTGCTCCTGAGGCAG----AGCAGGGTGTGCCTGTGGAGGGCGCGGGGAG-GTGG-CCCGTTGGGAGT

AGACTGCCAC-TTTAATCCCTTCAACTGCCTTTC----------CGCTGTTGTTTTCATTTTTCTAGAGAGGAACATAAA

AAGCATTCATCCGGTTGTGCTTTCCTTTCTGTCAAGAAGCAGTTTGAAGAATTAACCCTCGGTGAATTTTTGAAACTGGA

CAG

>Ateles_geoffroyi

ATATTTTCAGATTAGAGTTAACTGCTGGCTGTCCTTTTGTACTTTGTGTGGCCATGTTTTCATT----------------

-------------------------------------------------GTAATACTGCTCTGGTAACGGCGATAATCAG

TTATGCAGGCAGA-----TGAGCAGCAAATGAGAATCTGAGCTGGAGGGGTCCCTTGGGGAACCCTGGCCAATAATGCCC

TTATCTGCTCTT--------------------------------------------------------------------

--------------------------------------------------------------------------------

--------------------------------------------------------------------------------

--------------------------------------------------------------------------------

---------------------------------------AATCCTTACGGTG---GATTTCATAACAATGCCACTGAAAT

GAAATTACTTCAGACAGTTCCCTGAGAA-TGTTAGAGGGATTTGACACATGATTCTTTTGGACTT-ACACTGTGTAACAC

TTTCTCACCTAATTGCTAAAGAAGTCCAGATAAAATGGGTATGTTAGCCACATGGACGTAGCGGGAGAGGCCCACAGTGA

GAGAG------------AAGGTGCTAAGAGGGGCCATACGGGAATGTGGCTT-GGACACAGCACTGATTCCATCAACTTC

AGATTTGATGTTTTGCTCCTGACGCAG----AGGAGGGTGTGCCGGTGGAGGGC--GGGAAG-GTGA-CCCATGAGGAGT

GGACTGCCGC-TTTCATTCCTTCAGCTGCCTTTC----------CGC---TGTTCTGATTTTTCTAGAGAGGAACATAAA

AAGCATTCATCTGGTTGCGCTTTCCTTTCTGTCAAGAAGCAATTTGAAGAATTAACCCTCGGTGAATTTCTGAAACTGGA

CAG

>Aotus_nancymaae

ACGTTTTCAGATTAGAGCCAACTACTGGCTGTCCTTTCGTACTTTGTGTGGCCATGTTTTCATT----------------

-------------------------------------------------GTAATACTGCTCTGGTAACGGCAATAATCAG

TTATGCAGGGAGA-----CTAGCAGCAAATGAGAATCTGAGCTAGAGGGGTCCCTTGGGGAACCCTGGCGGATAATGCCC

TTATTTGCTCTT--------------------------------------------------------------------

--------------------------------------------------------------------------------

--------------------------------------------------------------------------------

--------------------------------------------------------------------------------

---------------------------------------AATCCTTACAGTG---GATTTCATAACAATTCCAGTGAAAT

GAAATTACTTCAAACCGTTCCTTGAGAA-TGTTAGAGGGATTTGACATGTGATTCTTTCGGACTT-ACACTGTGTAACAC

TTTCTTACCTAATTGCTAAAGAAGTCCAGGTAAAATGGATATGTTAGCCATATGGACGTAGGGAGAGAGGTTCACAGTGA

GAGAG------------AAGGGGCTAAGAGGGGCCGTACGGGAATGTGACTT-GGACACAGCACTGACTCCATCAACTTC

AGACTTGATGTTTTGCTCCTGAGGCAG----AGCAGGGTGTGCCGGTGGAGGGC--GGGAAG-GTGA-CCCATGAGGAGT

GGACTGCCGC-TTTCATTCCTTCAGCTGCCTTTC----------CGCTGTTGTTCTGATTTTTCTAGAGAGGAACATAAA

AAGCATTCATCTGGTTGCGCTTTCCTTTCTGTCAAGAAGCAGTTTGAAGAATTAACCCTCGGTGAATTTCTGAAACTGGA

CAG

>Alouatta_palliata

ATATTTTCAGATTAGAGTTAACTGCTGGCTGTCCTTTTGTACTTTGTGTGGCCATGTTTTCATT----------------

-------------------------------------------------GTAATACTGCTCTGGCAACAGCGATAATCAG

TTATGCAGGAAGA-----CGAGCAGCAAATGAGAATCTGAGCTAGAGGGGTTCCTTGGGGAACCCTGGCCGATAACGCCC

TTATCTGCTCTT--------------------------------------------------------------------

--------------------------------------------------------------------------------

--------------------------------------------------------------------------------

--------------------------------------------------------------------------------

---------------------------------------AATCCTTACGGTG---GATTTCATAACAATTCCACTGAAAT

GAAATTACTTCAGACAGTTCCTTGAGAA-TGTTAGAGGGATTTGACACGTGATTCCTTTGGACTT-ACACTGTGTAACAC

TTTCTCACCTAATTGCTAAAGAAGTCCAGATAAAATGGATATGTTAGCCACATGGACGTAGGGGGAGAGGCCCACAGTGA

GAGAG------------AGGGTGCTAAGAGGGGCCATACAGGAATGTGGCTT-GGACACAGCACTGATTGCATCAACTTC

AGACTGGATGTTTTGCTCCTGAGGCAG----AGCAGGGTGTGCCGGTGGAGGGC--GGGAAG-GTGACCCCAAGAGGAGT

GGACTGCCGC-TTTCATTCCTTCAGCTGCCTTTC----------CGC---TGTTCTGATTTTTCTAGAGAGGAACATAAA

AAGCATTCATCTGGTTGCGCTTTCCTTTCTGTCAAGAAGCAATTTGAAGAATTAACCCTCGGTGAATTTCTGAAACTGGA

CAG

>Cebus_albifrons

ACGTTTTCAGATTGGAGCTAACTACTGGCTGTCCTATTGTACTTTGTGTAGCCGTATTTTCACT----------------

-------------------------------------------------GTAATACTGCTCTGGTAATGGCAATAATCAG

TTATGCAGGGAGA-----CTAGCAGCAAATGAGAATCTGAGCTAGA-GGGTCCCTTGGGGAACCCTGGTGGATAATGCCC

TTATCTGCTCTT--------------------------------------------------------------------

--------------------------------------------------------------------------------

--------------------------------------------------------------------------------

--------------------------------------------------------------------------------

---------------------------------------AATCCTTACAGTG---GATTTCATAAGAATTCCAGTGAAAT

GAAATTACTTCAAACAGTTCCTTGAGAA-TGTTAGAGGGATTTGACACGTGATTCCTTCGGACTT-ACACTGTGTAACAC

TTTCACACCTAATTGCTAAAGAAGTCCAGGTAAAATGGATATGTTAGCCACATGGACGTAGGGAGAGAGGTCCACAGTGA

GGGAG------------AAGGTGCTAAGAGGGGCCGTACGGGAATGTGGCTT-GGACACAGCACTGATTCCATCAACTTC

AGACTTGATGTTTTGCTCCTGAGGCAG----AGCAGGGTGTGCCAGTGGAGGGC--GGGAAG-GTGA-CCCATGAGGAAT

GGACTGCCGC-TTTCATTCCTTCAGCTGCCTTTC----------CGC---TGTTCTGATTTTTCTAGAGAGGAACATAAA

AAGCATTCATCCGGTTGCGCTTTCCTTTCTGTCAAGAAGCAGTTTGAAGAATTAACGCTCGGTGAATTTCTGAAACTGGA

CAG

>Cebus_capucinus_imitator

ACGTTTTCAGATTGGAGCTAACTACTGGCTGTCCTATTGTACTTTGTGTAGCCGTATTTTCATT----------------

-------------------------------------------------GTAATACTGCTCTGGTAATGGCAATAATCAG

TTATGCAGGGAGA-----CTAGCAGCAAATGAGAATCTGAGCTAGA-GGGTCCCTTGGGGAACCCTGGTGGATAATGCCC

TTATCTGCTCTT--------------------------------------------------------------------

--------------------------------------------------------------------------------

--------------------------------------------------------------------------------

--------------------------------------------------------------------------------

---------------------------------------AATCCTTACAGTG---GATTTCATAAGAATTCCAGTGAAAT

GAAATTACTTCAAACAGTTCCTTGAGAA-TGTTAGAGGGATTTGACACGTGATTCCTTCGGACTT-ACACTGTGTAACAC

TTTCACACCTAATTGCTAAAGAAGTCCAGGTAAAATGGATATGTTAGCCACATGGACGTAGGGAGAGAGGTCCACAGTGA

GGGAG------------AAGGTGCTAAGAGGGGCCGTACGGGAATGTGGCTT-GGACACAGCACTGATTCCATCAACTTC

AGACTTGATGTTTTGCTCCTGAGGCAG----AGCAGGGTGTGCCAGTGGAGGGC--GGGAAG-GTGA-CCCATGAGGAAT

GGACTGCCGC-TTTCATTCCTTCAGCTGCCTTTC----------CGC---TGTTCTGATTTTTCTAGAGAGGAACATAAA

AAGCATTCATCTGGTTGCGCTTTCCTTTCTGTCAAGAAGCAGTTTGAAGAATTAACGCTCGGTGAATTTCTGAAACTGGA

CAG

>Callithrix_jacchus

ACGTTTTCAGATTAGAGCTAACTACTGGCTGTCCTTTTGTACTTTGTGTGGCTATGTTTTCATT----------------

-------------------------------------------------GTAACACTGCTCTGGTAACGGCAATAATCAG

TTATGCAGGGAGA-----CTAGCAGCAAATGAGAATCTGAGCTAGA-GTTTCCCTTGGGGAACCCTGGTGGAAAATGCCC

CTATTTGCTCTT--------------------------------------------------------------------

--------------------------------------------------------------------------------

--------------------------------------------------------------------------------

--------------------------------------------------------------------------------

---------------------------------------AATCCTTACAGTG---GATTTCATAACAATTCCAGTGAAAT

GAAATTACTTCAAACAGTTCCTTGAGAA-TGTTAGAGGGATTTGACACGTGATTCTTTCGGACTT-ACACTGTATAACAC

TTTCTCACCTAATTGCTAAAGAAGTCCAGGTAAAATGGATATGTTAGTCACATGGACGTAGGGAGAGAGGTCCACAGTGA

GAGAG------------AAGGTGCTAAGAGGGGCCATAAGGGAATGTGGCTT-GGACCCAGCACTGATTCCATCAACATC

AGACTTGATGTTTTGCTCCTGAGGCAG----AGCAGGGTGTGCTGGTGGAGGGC--GGGAAG-GTGA-CCCATGAGGAGT

AGACTGCTGC-TTTCATTCCTTCAGCTGTCTTTC----------CGCTGTTGTTCTGATTTTTCTAGAGAGGAACATAAA

AAGCATTCATCTGGTTGCGCTTTCCTTTCTGTCAAGAAGCAGTTTGAAGAATTAACCCTTGGTGAATTTCTGAAACTGGA

CAG

>Pithecia_pithecia

ACATTTTCAGATTCGAGTTAACTACTGGCTGTCCTTTTGTACTTTGTGTGGCCATGTTTTCATT----------------

-------------------------------------------------GTAATACTGCTCTGGTAATGGCGATAATCAG

TTATGCAGGGGGA-----CTAGCAGCAAATGAGAATGTGAGCTAGAGGGGTCCCTTGGGGAACCCTGGCTGATAATGTCC

TTATCTGCTCTT--------------------------------------------------------------------

--------------------------------------------------------------------------------

--------------------------------------------------------------------------------

--------------------------------------------------------------------------------

---------------------------------------AATCCTTACAGTA---GATTTCATAACAATTCCAGTGAAAT

GAAATTACTTCAAACAGTTCCTTGAGGA-TGTTAGAGGGATTTGACAGGTGATTCTTTTGGACTTAACACTGTGTAACAC

TTTCTCACCTAATTGCTAAAGAAGTCCAGATAAAATGGATATGTTAGCCACATGGACGGAGGGGGAGAGGTCCACAGAGA

GAGAA------------AAGGTGCTAAGAGGGGCCATACGGGAATGTGGTTT-GGACACAGCACTGATTCCATCAACTTC

AGACTTGATGTTTTGCTCCTGAGGCTG----AGCAGGGTGTGCTGGTGGAGGGT--GGGAAG-GTGA-CCCATGAGGAGT

GGACTGCCTC-TTTCATTCCTTCAGCTGCCTTTC----------CACGGTTGTTCTGATTTTTCTAGAGAGGAACATAAA

AAGCATTCATCTGGTTGCACCTTCCTTTCTGTCAAGAAGCAGTTTGAAGAATTAACCCTCGGTGAATTTCTGAAACTGGA

CAG

>Saimiri_boliviensis

ACATTTTCAGATTAGAGCTAACTACTGGCTGTCCTTTCGTACTTTGTGTGGCCATGTTTTCATT----------------

-------------------------------------------------GTAATACCGCTCTGGTAACGGCAATAATCAG

TTATGCAGGGAGA-----CAAGCAGCAAATGAGAATCTGAGCTAGAGGGGTCCCTTGGAGAACCCTGGTGGATAATACCC

TTATTTGCTGTT--------------------------------------------------------------------

--------------------------------------------------------------------------------

--------------------------------------------------------------------------------

--------------------------------------------------------------------------------

---------------------------------------AATCCTTACAGTG---GATTTCATAACAATTCCAGTGAAAT

GAAATTACTTCAAACAGTTCCTTGAGAA-TGTTAGAGGGATTTGACACGTGATTCTTTTGGACTT-ACACCGTATAACAC

TTTCTCACCTAATTGCTAAAGAAGTCCAGGTAAAATGGATATGTTATCCACATGGACGTAGGGAGAGAGGTCCACAGTGA

GGGAG------------AAGCTGCTAAGAGGGGCCGTACGGGAATGTGGCTT-GGACACAGCACTGATTCCATCAACTTC

AGACTTGATGTTTTGCTCCTGAGGCAG----AGCAGGGTGTTCCGGGGGAGGGC--GGGAAG-GTGA-CCTATGAGGAGT

GGACTGCCGC-CTTCATTCCTTCAGCTGCCTTTC----------CGCTGTTGTTCTGATTTTTCTAGAGAGGAACATAAA

AAGCATTCATCTGGTTGCGCTTTCCTTTCTGTCAAGAAGCAGTTTGAAGAATTAACCCTCGGTGAATTTCTGAAACTGGA

CAG

>Daubentonia_madagascariensis

ATATTTTCAGATTATAGTT-ACTATCGGCCATCCTT-TGGACTTTGTGTGGCTGTGTTTTCATTCTGT------------

----------------------------------------------TAAATAATACTGTTCTGGTTGGGGTGACAGTCAG

CTGTTCAGGGAGATTGCCATGGCAGAGAAAGATGATACAAGGTAGAGGGCTCCCCTGGGGAAGCCTGGCCAATGATG-CC

CT---TGTTCTG--------------------------------------------------------------------

--------------------------------------------------------------------------------

--------------------------------------------------------------------------------

--------------------------------------------------------------------------------

---------------------------------------AACCA-----GTC---AATTATGTAA-AATTCCAGGGAAAT

GAAATTACTTCAAACAGTTCCTTGAGGACTG-TAGAGGGATTTGAC-----------------TT-ATACCATATAACAC

TTTCCCCACTAACTGCTAAAGGAGTCCAGATAAAA----TACATCAACCACAAGGATATGGGGGAAGATGTCCACAGAGA

G--AAGGTGCTAAGTCTTAGCAACTAAGACAAACCACGTGGGAATGTGGCTTGGGGCACAGCACTGATTCAGTCAACCTC

AGCCTTAACA-------CTTGAAGCAG----AGCAAGGTGTGCTCGTGAGGGG----------GTGG-GCAGTGGGAGGT

GAACTGCTGC-TTTCCCCCTTTTACCTGATTTCCTCTGTTGACATGCTCATGTATTGATTTTCCTAGAGAGGAACACAAA

AAGCATTCATCTGGTTGTGCTTTCCTTTCTGTCAAGAAGCAGTTTGAAGAATTAACCCTCAGTGAATTTTTGAAACTGGA

CAG

>Eulemur_macaco

ATATTTTCAGATTATAGTT-ACTGTTGGCCATCCTTGTGGACTTTGTGTGGC--TATTTTCATTCTGT------------

----------------------------------------------TAGATAATACTATTCTGGTTAGGGTGACAGTCAG

CTGTTCAGGGAGATTCCAATGGCAGAGAATGATGGTATAAGGTGGAAGGGTCCCCT-GGGAAGCCTGGCCAATGATG-TC

CT---TGTTCTG--------------------------------------------------------------------

--------------------------------------------------------------------------------

--------------------------------------------------------------------------------

--------------------------------------------------------------------------------

---------------------------------------AATCA-----GTG---GATTATGTAA-AATTCTAGGGAAAT

GAAACCACTTCAAACAGTTCCTTGAGGACTG-TAGAGGGATTTGAC-----------------TT-ACACCATATAACAC

TTTTCCCACT-ATTGCTAAAAGAGTCCAGATAAAA----TACATCAACCAC-AGGGTATGGGGG-AGACGTCCACAGAGA

GAGAATGTGCTAAGTCTTAGCAGCTGAGACAAGCCATGTGGGCATGT-GCTTGGGGCACAGCACTGATCCGATCAAGCTC

AGACCTAGCACCTCACTCTTGGAGCAG----GACAGGGTGTGCTCCTGAGAGGG---------GTGG-GCAATGGGAGGC

A-ATGGCTGC-TTTCCCCCCTTTACCTGATTTCCTCTGTTGACGTGCTCTTGTCTTTGTTTTTCTAGAGAGGAACATAAA

AAGCATTCATCTGGTTGTGCTTTCCTTTCTGTCAAGAAGCAGTTTGAAGAATTAACCCTCAGTGAATTTTTGAAACTGGA

CAG

>Lemur_catta

ATATTTTCAGATTATAGTT-ACTATTGGCCATCCTTGTGGACTTTATGTGGC--TATTTTCATTCTGT------------

----------------------------------------------TAAATAATACTGTTCTGGTTAGGGCGACAGGCAG

CTGTTCAGGGAGATTCCCATGACAGAGAATGATGGTATAAGGCAGAGGGGTCCCCT-GGGAAGCCTGGCCAATGATG-CC

CT---TGTTCTG--------------------------------------------------------------------

--------------------------------------------------------------------------------

--------------------------------------------------------------------------------

--------------------------------------------------------------------------------

---------------------------------------AATCA-----GTG---GATTATGTAA-AATTCTAGGGAAAT

GAAACCACTTCAAACAGTTCCTTGAAGACTG-TAGAGGGATTTGAC-----------------TT-ACACCATATAACAC

TTTTCCCACT-ATTGCTAAAGGAGTCCAGATAAAA----TACATTAACCAC-AGGGTATGGGGG-AGACGTCCACAGAGA

GAGAATGTGCTAAGTCTTAGCAGCTGAGACAAGCCATGTGGGCATGT-GCTTGGGGCACAGCACTGATCCGATCAAGCTC

AGACCTAGCACCTCACTCTTGGAGCAG----GACAGGGTGTGCTCCTGAGGGGG---------GTGG-GCAACGGGAGGC

G-CTGGCTGC-TTTCCTCCCTTTACCTGATTTCCTCTGTTGACGTGCTCATGTCTTCATTTTTCTAGAGAGGAACATAAA

AAGCATTCATCTGGTTGTGCTTTCCTTTCTGTCAAGAAGCAGTTTGAAGAATTAACCCTCAGTGAATTTTTGAAACTGGA

CAG

>Microcebus_murinus

ATATTTTCAGATTATAGTT-ACTGTTGGCCATCCTTGTGGACTTTGGGTGAC--TGTTTTCATTCTGTTAAATAATACTG

TTCTTACACTTGTGTTTATATATGTCAAAATAAATAAATAAATAAATAAATAATACTGTTCTGATTAGGACAACAGTTAG

CTGTTCAGGGAGAGTCCTATGGCAGAGAATGATGGTATGAGGTAGAGGGGTCCCCT-GGGAAGCCTGGCCAATGATG-CC

TT---TGCTCTG--------------------------------------------------------------------

--------------------------------------------------------------------------------

--------------------------------------------------------------------------------

--------------------------------------------------------------------------------

---------------------------------------AACCA-----GTG---GCTCATGTAA-AATTCTAGGGAAAT

GAAATCACTTCAAACAGTTCCTTGAGTACTG-TAGAGGGATTTGAC-----------------TT-ATACCATATAACAC

TTTTCCCACT-ATTGCTAAAGGAGTCCAGATAAAA----TACATCAACCAC-AGGATTTGGGGG-AGACGTCCACAGAGA

GATACCGTGCTAAGTCTTAGCAGCTGAGACAAGCCATGTGGGTATGT-GCTTGGGGCACAGCACTGATTCGATCAAGCTC

AGACTTAGCACTTCACTCTTGGAGCAAAACAGGCAGGGTATGCTCATGGGGGTGGGCGGGGCCGGGG-GGATTGGGAAGT

G-ATGGCTGC-TTTCCCCCTTTTATCTGACTTCCTCTGTTGACTTGCTCATGTCTTGATTTTTCTAGAGAGGAACATAAA

AAGCATTCGTCTGGTTGTGCTTTCCTTTCTGTCAAGAAGCAGTTTGAAGAATTAACCCTCAGTGAATTTTTGAAACTGGA

CAG

>Nycticebus_coucang

CTATTTTCATATTATAATT-ACTACTGGCCAT-----TGGACTTTGTGTGGCTGTGTTTTTATTT---------------

--------------------------------------------------TAATACTGTTCTGGTTAGG-TGACATTCAG

CTGCTCAGGGAAATTCCTCTGGGAGAAAATGACGGTGTGAGGAAGAGGGGTCCCCTGGGAAAGACTGGCCAATGATGTTC

CC---TATTCTG--------------------------------------------------------------------

--------------------------------------------------------------------------------

--------------------------------------------------------------------------------

--------------------------------------------------------------------------------

---------------------------------------AACCA-----GTG---GATTCTGTAA-AAGTTCAGGGAAAT

GAAATTACTTCAAACAGTTCCTTGAGGATTATAGGAGGGGTCTCAC-----------------TT-CTACCTTCTAACAC

TTTCCCCACTAATCGCTAAAGGAGTCTAGATAAAA----TACATCAACCACAGGGATATGGGGGAAGAC-TCTGTGGAGG

GAGAAGGTGCTAAGTCTTAGCAGCTGAGACAAGCCACGTGGGAATGTGGCCGGGGGCAAAGCACTAGTTC---CAACTTC

AGTCTTAACACTTTACTCTGGAAGCAG----AACACAGTGTGCTCCTTAGGGG----------GTGG-TCAGAGGAAGAT

GAACTACTGA--TTTCCCCCGTTACCTGATTTC--CTGCTGA----CTTATGTATTGATTTTTCTAGAGAGGAACATAAA

AAGCATTCATCTGGTTGTGCTTTCCTTTCCGTCAAGAAGCAGTTTGAAGAATTAACCCTCAGTGAATTTTTGAAACTGGA

CAG

>Propithecus_coquereli

ATATTTTCAGATTATAGTT-ACTATTGGCCATCCTTGTGGACTTTGTGTGGC--TGTTTTCATTCCGT------------

----------------------------------------------TAAATACTACTGTTCTGGTTAGGGCGACAGTCAA

CTGTTCAGGGAGATTCCCATGGCAGAGAATGATGGTATGAGGTAGAGGGGT-CCCT-GGGAAGTCTGGCCAATGATG-TC

CT---TGTTCTG--------------------------------------------------------------------

--------------------------------------------------------------------------------

--------------------------------------------------------------------------------

--------------------------------------------------------------------------------

---------------------------------------AACCA-----GTG---GATTATGTAA-AATTCCAGGGAAAT

GAAATCACTTCGAACAGTTCCTTGAGGACTGTTAGAGGGATTTGAC-----------------TT-ATACCATATAACAC

TTTTCCCACT-CTTGCTAAAGGAGTCCGGATAAAA----TACATCAACCAC-AGGATGTGGGGG-AGATGCCCACAGAGA

GAGAACG------GTCTAAGCAGCTGAGACAAGCCACGTGGGCCTGT-GCTTGGGGCACAGCACTGATTCCGTCAAGCTC

AGACTTAGCACTTCACTCTTGGAGCAGAACAGGCAGGCTGTGCTCACGAGGGGG---------GTGG-GCAGTGGGAGGC

C-AGGGCTGCTTTTTCCCCTTTTACCTGATTTCCTCTCTTGACGTGCTCATGTCTTGATTTTCCTAGAGAGGAACATAAA

AAGCATTCGTCTGGTTGTGCTTTCCTTTCTGTCAAGAAGCAGTTTGAAGAATTAACCCTCAGTGAATTTTTGAAACTGGA

CAG

>Prolemur_simus

ATATTTTCAGATTATAGTT-ACTATTGGCCATCCTTGTGGACTTTATGTGGC--TATTTTCATTCTGT------------

----------------------------------------------TAAATAATACTATTCTGGTTAGGGCGACAGTCAG

CTGTTCAGGGAGATTCCCATGGCAGAGAATGATGGTATAAGGCAGAGGGGTCCCCT-GGGAAGCCTGGCCAATGATG-CC

CT---TGTTCTG--------------------------------------------------------------------

--------------------------------------------------------------------------------

--------------------------------------------------------------------------------

--------------------------------------------------------------------------------

---------------------------------------AATCA-----GTG---GATTATGTAA-AATTCTAGGGAAAT

GAAACCACTTCAAACAGTTCCTTGAGGACTG-TAGAGGGATTTGAC-----------------TT-ATACCATATAACAC

TTTTCCCACT-ATTGCTAAAGGAGTCCAGATAAAA----TATATCAACCAC-AGGGTATGGGGG-AGACGTCCACAGAGA

GAGAATGTGCTAAGTCTGAGCAGCTGAGACAAGCCATATGGGCATGT-GCTTGGGGCACAGCACTGATCCGATCAAGCTC

AGACCTAGCACCTCACTCTTGGAGCAG----GACAGGGTGTGCTCCTGAGGGGA---------GTGG-GCAATGGGAGGC

G-CTGGCTGC-TTTCCTCCCTTTACCTGATTTCCTCTGTTGATGTGCTCATGTCTTCATTTTTCTAGAGAGGAGCATAAA

AAGCATTCATCTGGTTGTGCTTTCCTTTCTGTCAAGAAGCAGTTTGAAGAATTAACCCTCAGTGAATTTTTGAAACTGGA

CAG
