# Supplementary material for: The multicomparative 2-n-way genome suite
Source: HighWire-hosted journal article supplement (doi:10.1101/gr.262261.120), 2020-07-29
Supplement: SupplementalTableS1.xlsx [file SupplementalTableS1.xlsx]

## Sheet: Sheet1
Supplemental Table 1: Example 3 - Abundant intron loss in mammals and birds
(0) indicates the absence of intron, (1) indicates its presence, (?) denotes lack of sequence information, (d) denotes deletions in the investigated genomic region
Clade	Name of locus	Coordinates	Gene	New/refound from Coulombe-Huntington and Majewski 2007	Homo sapiens	Pan troglodytes	Gorilla gorilla	Pongo abelii	Nomascus leucogenys	Macaca mulatta	Callithrix jacchus	Cebus capucinus imitator	Tarsius syrichta	Otolemur garnettii	Eulemur macaco	Galeopterus variegatus	Tupaia chinensis	Mus musculus	Ochotona princeps	Bos taurus	Canis familiaris	Myotis lucifugus	Loxodonta africana
Catarrhini	IL1	Mouse(mm10): chr18 64511877 64511983	Nars	refound	0	0	0	0	0	0	1	1	1	1	1	1	1	1	1	1	1	1	1
Anthropoidea	IL2	Dog(canFam3): chr27 2227256 2227498	KRT8	refound	0	0	0	0	0	0	0	?	1	1	1	1	1	1	1	1	1	1	1
Primates	IL3	Cow(bosTau8): chr29 36697293 36698169	PRDM10	new	0	0	0	0	0	0	0	0	0	0	0	1	1	1	1	1	1	1	1
Clade	Name of locus	Coordinates	Gene	New/refound from Coulombe-Huntington and Majewski 2007	Mus musculus	Mus spretus	Rattus norvegicus	Cricetulus griseus	Microtus ochrogaster	Nannospalax galili	Jaculus jaculus	Castor canadensis	Cavia porcellus	Homo sapiens	Bos taurus	Loxodonta africana
Mus genus	IL4	Human(hg38): chr1 11055926 11056010	SRM	refound	0	0	1	1	1	1	1	1	1	1	1	1
Mus genus	IL5	Human(hg38): chr1 161040330 161040575	USF1	refound	0	0	1	1	1	1	1	1	1	1	1	1
Mus genus	IL6	Human(hg38): chr5 72893246 72893376	TNPO1	refound	0	0	1	1	1	1	1	1	1	1	1	1
Mus genus	IL7	Human(hg38): chr6 30583708 30583804	ABCF1	refound	0	0	1	1	1	1	1	1**	1	1	1	1
Mus genus	IL8	Human(hg38): chr6 136233499 136239465	MTFR2	refound	0	0*	1	1	?	1	?	1**	1	1	1	1
Mus genus	IL9	Human(hg38): chr7 151223849 151223931	ABCF2	refound	0	0	1	1	1	1	1	1	1	1	1	1
Mus genus	IL10	Human(hg38): chr12 6570693 6570868	CHD4	refound	0	0	1	1	1	1	1	1	1	1	1	1
Mus genus	IL11	Human(hg38): chr14 100342571 100343274	WARS	refound	0	0	1	1	1	1	1	1	1	1	1	1
Mus genus	IL12	Human(hg38): chr14 102042288 102042383	DYNC1H1	refound	0	0	1	1	1	1	1	1	1	1	1	1
Mus genus	IL13	Human(hg38): chr17 29576450 29576521	GIT1	refound	0	0	1	1	1	1	1	1	1	1	1	1
Mus genus	IL14	Human(hg38): chr17 41758518 41758714	JUP	refound	0	0	1	1	1	1	1	1	1	1	1	1
Mus genus	IL15	Human(hg38): chr17 63830189 63830270	PSMC5	refound	0	0	1	1	1	1	1	1	1	1	1	1
Mus genus	IL16	Human(hg38): chr19 10110614 10110696	PPAN	refound	0	0	1	1	1	1	1	1	1	1	1	1
Mus genus	IL17	Human(hg38): chr19 10581634 10581747	AP1M2	refound	0	0	1	1	1	1	1	1	1	1	1	1
Mus genus	IL18	Human(hg38): chr19 11553810 11554010	ELOF1	refound	0	0	1	1	1	1	1	1	1	1	1	1
Mus genus	IL19	Human(hg38): chr6 122451754 122451887	SERINC1	refound	0	0	1	1	1	1	1	1	1	1	1	1
Mus genus	IL20	Human(hg38): chr6 43008261 43008366	PPP2R5D	new	0	0	1	1	1	1	1	1	1	1	1	1
Mus genus	IL21	Human(hg38): chr1 39561788 39562072	PABPC4	new	0	0	1	1	1	1	1	1	1	1	1	1
Mouse+Rat	IL22	Human(hg38): chr1 161209595 161209856	NDUFS2	refound	0	0	0	1	1	1	1	1	1	1	1	1
Mouse+Rat	IL23	Human(hg38): chr6 30585991 30586133	ABCF1	refound	0	0	0	1	1	1	1	1**	1	1	1	1
Mouse+Rat	IL24	Human(hg38): chr11 838028 838132	CD151	refound	0	0	0	1	1	1	1	1	1	1	1	1***
Mouse+Rat	IL25	Human(hg38): chr11 66851946 66852438	PC	refound	0	0	0	1	1	1	1	1	1	1	1	1
Mouse+Rat	IL26	Human(hg38): chr11 102350749 102350843	BIRC2	refound	0	0	0	1	1	1	1	1	1	1	1	1
Mouse+Rat	IL27	Human(hg38): chr19 19527770 19528006	NDUFA13	refound	0	0	0	1	1	1	1	1	1	1	1	1***
Mouse+Rat	IL28	Cow(bosTau8): chr18 55710802 55710933	RPL18	refound	0	0	0	1	1	1	1	1	1	1	1	1
Mouse+Rat	IL29	Human(hg38): chr19 3620803 3623687	CACTIN	new	0	0	0	1	1	1	1	1	1	1	1	1***
Mouse+Rat	IL30	Cow(bosTau8): chr3 101833019 101833127	KIF2C	new	0	0	0	1	1	1	1	1	1	1	1	1***
Mouse+Hamster	IL31	Human(hg38): chr2 32401385 32401462	BIRC6	refound	0	0	0	0	0	1	1	1	1	1	1	1
Mouse+Hamster	IL32	Human(hg38): chr2 117822061 117822146	DDX18	refound	0	0	0	0	0	1	1	1	1	1	1	1
Mouse+Hamster	IL33	Human(hg38): chr2 171006889 171006971	TLK1	refound	0	0	0	0	0	1	1	1	1	1	1	1
Mouse+Hamster	IL34	Human(hg38): chr6 33275883 33275964	RPS18	refound	0	0	0	0	0	1	1	1	1	1	1	1***
Mouse+Hamster	IL35	Human(hg38): chr6 110892443 110892734	AMD1	refound	0	?	0	0	0	1	1	1	1	1	1	1
Mouse+Hamster	IL36	Human(hg38): chr11 64913136 64913265	ATG2A	refound	0	0	0	0	0	1	1	1	1	1	1	1
Mouse+Hamster	IL37	Human(hg38): chr12 120199205 120199309	RPLP0	refound	0	0	0	0	0	1	1	1	1	1	1	1
Mouse+Hamster	IL38	Human(hg38): chr14 105478360 105478449	CRIP2	refound	0	0	0	0	0	1	1	1	1	1	1	1***
Mouse+Hamster	IL39	Human(hg38): chr16 58515880 58515952	SETD6	refound	0	0	0	0	0	1	1	1	1	1	1	1
Mouse+Hamster	IL40	Human(hg38): chr12 2859664 2864319	FOXM1	new	0	0	0	0	0	1	?	1	1	1	1	1
Mouse+Hamster	IL41	Human(hg38): chr2 189754065 189754140	OSGEPL1	new	0	0	0	0	0	1	1	1	1	1	1	1
Mouse+Blind mole-rat	IL42	Human(hg38): chr1 3625273 3625423	TPRG1L	refound	0	0	0	0	0	0	1	1	1	1	1	1
Mouse+Blind mole-rat	IL43	Human(hg38): chr19 3980979 3981338	EEF2	refound	0	0	0	0	0	0	1	1	1	1	1	1
Mouse+Blind mole-rat	IL44	Human(hg38): chr19 10135852 10136120	DNMT1	refound	0	0	0	0	0	0	1	1	1	1	1	1
Mouse+Blind mole-rat	IL45	Human(hg38): chr20 58909579 58909683	GNAS	refound	0	0	?	0	0	0	1	1	1	1	1	1
Mouse+Blind mole-rat	IL46	Human(hg38): chr2 75646910 75647101	MRPL19	refound	0	0	0	0	0	0	1	1**	1	1	1	1***
Mouse+Blind mole-rat	IL47	Human(hg38): chr19 1090988 1091791	POLR2E	refound	0	0	0	0	0	0	1	1	1	1	1	1
Mouse+Blind mole-rat	IL48	Human(hg38): chr19 6416882 6416986	KHSRP	refound	0	0	0	0	0	0	1	1	1	1	1	1
Mouse+Jerboa	IL49	Human(hg38): chr1 26942776 26942870	NUDC	refound	0	0	0	0	0	0	0	1	1	1	1	1
Mouse+Jerboa	IL50	Human(hg38): chr18 80036710 80037329	RBFA	refound	0	0	0	0	0	0	0	1	1	1	1	1
Mouse+Jerboa	IL51	Human(hg38): chr19 3204144 3204572	NCLN	refound	0	0	0	0	0	0	0	1	1	1	1	1***
Mouse+Jerboa	IL52	Human(hg38): chr20 62312316 62312399	LAMA5	refound	0	0	0	0	0	0	0	1	1	1	1	1***
Note - (*) indicates Mus caroli; (**) indicates Dipodomys ordii; (***) indicates Trichechus manatus
Clade	Name of locus	Coordinates	Gene	New/refound from Coulombe-Huntington and Majewski 2007	Mus musculus	Mus spretus	Rattus norvegicus	Cricetulus griseus	Microtus ochrogaster	Nannospalax galili	Jaculus jaculus	Castor canadensis	Cavia porcellus	Ictidomys tridecemlineatus	Oryctolagus cuniculus	Ochotona princeps	Homo sapiens	Bos taurus	Loxodonta africana
Rodents	IL53	Human(hg38): chr11 65526043 65526123	SCYL1	refound	0	0	0	0	0	0	0	0	0	0	1*	1	1	1	1
Rodents	IL54	Human(hg38): chr15 69455287 69455427	RPLP1	refound	0	0	0	0	0	0	0	0	0	0	1	1	1	1	1***
Rodents	IL55	Human(hg38): chr19 804208 804291	PTBP1	refound	0	0	0	0	0	0	0	0	0	0	1*	1	1	1	1
Rodents (Glires)	IL56	Human(hg38): chr20 63560697 63560794	HELZ2	refound	0	0	0	0	0	0	0	0	0	0	?	?	1	1**	1
Note - (*) indicates Lepus americanus; (**) indicates Vicugna pacos; (***) indicates Trichechus manatus
Clade	Name of locus	Coordinates	Gene	New/refound from Coulombe-Huntington and Majewski 2007	Oryctolagus cuniculus	Ochotona princeps	Mus musculus	Cavia porcellus	Ictidomys tridecemlineatus	Homo sapiens	Galeopterus variegatus	Tupaia chinensis	Bos taurus	Loxodonta africana
Lagomorpha	IL57	Mouse(mm10): chr4 130056969 130057992	COL16A1	new	0	0	1	1	1	1	1	1	1	1
Lagomorpha	IL58	Mouse(mm10): chr2 173012107 173012179	RAE1	new	0	0	1	1	1	1	1	1	1	1
Lagomorpha	IL59	Mouse(mm10): chr5 110312815 110312905	POLE	new	0	0	1	1	1	1	1	1	1	1
Clade	Name of locus	Coordinates	Gene	New/refound from Coulombe-Huntington and Majewski 2007	Homo sapiens	Galeopterus variegatus	Tupaia chinensis	Mus musculus	Oryctolagus cuniculus	Ochotona princeps	Bos taurus	Canis familiaris	Equus caballus	Myotis lucifugus	Sorex araneus	Loxodonta africana	Dasypus novemcinctus	Monodelphis domestica
Euarchontoglires	IL60	Cow(bosTau8): chr29 29619799 29619914	PUS3	new	0	0	0	0	0	?	1	1	1	1	1	1	1	1
Euarchontoglires	IL61	Cow(bosTau8): chr19 54654281 54654437	TMC6	new	0	0	0	0	?	0	1	1	1	1*	1	1	1	1
Euarchontoglires	IL62	Cow(bosTau8): chr7 5822446 5822528	MYO9B	new	0	0	0	0	?	0	1	1	1	1	1	1	1**	1
Note - (*) indicates Myotis myotis; (**) indicates Choloepus hoffmanni
Clade	Name of locus	Coordinates	Gene	New/refound from Coulombe-Huntington and Majewski 2007	Bos taurus	Ovis aries	Tursiops truncatus	Vicugna pacos	Canis familiaris	Equus caballus	Myotis lucifugus	Sorex araneus	Homo sapiens	Galeopterus variegatus	Tupaia chinensis	Mus musculus	Ochotona princeps	Loxodonta africana
Cow+Sheep	IL63	Human(hg38): chr13 113254799 113254952	CUL4A	new	0	0	1	1	1	1	1	1	1	1	1	1	1	1
Cow+Sheep	IL64	Human(hg38): chr11 64200037 64200168	STIP1	new	0	0	1	1	1	1	1	1	1	1	1	1	1	1
Cetartiodactyla	IL65	Human(hg38): chr12 132856631 132857404	CHFR	new	0	0	0	0	1	1	1	1	1	1	1	1	1	1
Clade	Name of locus	Coordinates	Gene	New/refound from Coulombe-Huntington and Majewski 2007	Myotis lucifugus	Desmodus rotundus	Artibeus jamaicensis	Mormoops blainvillei	Hipposideros armiger	Rhinolophus ferrumequinum	Pteropus vampyrus	Rousettus aegyptiacus	Eonycteris spelaea	Eidolon helvum	Equus caballus	Bos taurus	Canis familiaris	Sorex araneus	Homo sapiens	Galeopterus variegatus	Tupaia chinensis	Mus musculus	Ochotona princeps	Loxodonta africana
Chiroptera	IL66	Mouse(mm10): chr11 119481347 119482396	RNF213	new	0	0	0	0	0	0	0	0	0	0	1	1*	1	1	1	1	1	1	1	1
Chiroptera	IL67	Mouse(mm10): chr7 4794183 4794417	RPL28	new	0	0	0	0	0	0	0	0	0	0	1	1	1	1	1	1	1	1	1	1
Note - (*) indicates Vicugna pacos
Clade	Name of locus	Coordinates	Gene	New/refound from Coulombe-Huntington and Majewski 2007	Bos taurus	Canis familiaris	Equus caballus	Myotis lucifugus	Sorex araneus	Erinaceus europaeus	Homo sapiens	Galeopterus variegatus	Tupaia chinensis	Mus musculus	Ochotona princeps	Loxodonta africana
Scrotifera	IL68	Human(hg38): chr16 684903 684991	WDR24	refound	0	0	0	0	1	1	1	1	1	1	1	1
Scrotifera	IL69	Human(hg38): chr19 4446414 4446499	UBXN6	refound	0	0	0	0	1	1	1	1	1	1	1	1
Clade	Name of locus	Coordinates	Gene	New/refound from Coulombe-Huntington and Majewski 2007	Sorex araneus	Crocidura indochinensis	Erinaceus europaeus	Condylura cristata	Myotis lucifugus	Equus caballus	Bos taurus	Canis familiaris	Homo sapiens	Galeopterus variegatus	Tupaia chinensis	Mus musculus	Loxodonta africana
Soricidae	IL70	Human(hg38): chr5 40834266 40834470	RPL37	new	0	0	1	1	1	1	1	1	1	1	1	1	1
Soricidae	IL71	Human(hg38): chrX 154532463 154532566	G6PD	new	0	0	1	1	1	1	1	1	1	1	1	1	1
Soricidae	IL72	Human(hg38): chrX 150987303 150987776	HMGB3	new	0	0	1	1	1	1	1	1	1	1	1	1	1
Soricidae	IL73	Human(hg38): chr17 39202440 39202988	RPL19	new	0	0	1	1	1	1	1	1	1	1	1	1	1
Soricidae	IL74	Human(hg38): chr9 136418110 136418554	PMPCA	new	0	0	1	1*	1**	1	1	1	1	1	1	1	1
Soricidae	IL75	Human(hg38): chr19 2222560 2223280	DOT1L	new	0	0	1	1	1	1	1	1	1	1	1	1	1
Soricidae	IL76	Human(hg38): chr19 2432524 2433825	LMNB2	new	0	0	?	1	1	1	1	1	1	1	?	1	1
Soricidae	IL77	Human(hg38): chr19 19278797 19279212	SUGP1	new	0	0	1	1	1	1	1	1	1	1	1	1	1
Soricidae	IL78	Human(hg38): chr19 18865779 18866043	UPF1	new	0	0	1	1	1	1	1	1	1	1	?	1	1
Soricidae	IL79	Human(hg38): chr19 18850243 18850687	UPF1	new	0	0	1	1	1	1	1	1	1	1	1	1	1
Soricidae	IL80	Human(hg38): chr7 98217812 98217935	TECPR1	new	0	0	1	1	1	1	1	1	1	1	1	1	1
Soricidae	IL81	Human(hg38): chr5 176656817 176656894	TSPAN17	new	0	0	1	1	1	1	1	1	1	1	1	1	1
Soricidae	IL82	Human(hg38): chr7 128841364 128841453	FLNC	new	0	0	1	1	1	1	1	1	1	1	1	1	1
Soricidae	IL83	Human(hg38): chr17 81696748 81696823	HGS	new	0	0	1	1*	1	1	1	1	1	1	1	1	1
Soricidae	IL84	Human(hg38): chr19 12668426 12668519	WDR83OS	new	0	0	1	1	1	1	1	1	1	1	1	1	1
Soricidae	IL85	Human(hg38): chr19 12771073 12771158	HOOK2	new	0	0	1	1	1	1	1	1	1	1	1	1	1
Note - (*) indicates Scalopus aquaticus; (**) indicates Myotis myotis
Clade	Name of locus	Coordinates	Gene	New/refound from Coulombe-Huntington and Majewski 2007	Bos taurus	Canis familiaris	Equus caballus	Myotis lucifugus	Sorex araneus	Homo sapiens	Galeopterus variegatus	Tupaia chinensis	Mus musculus	Ochotona princeps	Loxodonta africana
Laurasiatheria	IL86	Human(hg38): chr19 6381479 6381553	GTF2F1	refound	0	0	0	0	0	1	1	1	1	1	1
Clade	Name of locus	Coordinates	Gene	New/refound from Coulombe-Huntington and Majewski 2007	Homo sapiens	Galeopterus variegatus	Tupaia chinensis	Mus musculus	Ochotona princeps	Bos taurus	Equus caballus	Myotis lucifugus	Sorex araneus	Loxodonta africana	Dasypus novemcinctus	Monodelphis domestica	Sarcophilus harrisii	Ornithorhynchus anatinus	Aquila chrysaetos canadensis
Placentalia	IL87	Opossum(monDom5): chr6 157671704 157671846	DNASE1L2	new	0	0	0	0	0	0	0	0	0	0	0	1	1	1	1
Clade	Name of locus	Coordinates	Gene	New/refound from Coulombe-Huntington and Majewski 2007	Gallus gallus	Coturnix japonica	Meleagris gallopavo	Numida meleagris	Anas platyrhynchos	Anser cygnoides	Taeniopygia guttata	Geospiza fortis	Ficedula albicollis	Melopsittacus undulatus	Aquila chrysaetos canadensis	Uria lomvia	Rhea americana	Alligator mississippiensis	Homo sapiens
Galliformes (or more terminal)	IL88	Zebra finch(taeGut2): chr1A 50340340 50340618	RPL3	new	0	0	0	0	1	1	1	1	1	1	1	1	1**	1	1
Galliformes (or more terminal)	IL89	Zebra finch(taeGut2): chr21 1019621 1020976	GUCY2F	new	0	0	0	0	1	1	1	1	1	1	1	1	1**	1	1***
Galloanserae	IL90	Zebra finch(taeGut2): chr5 8000666 8000805	SPTB	new	0	0	0	0	0	0	1	?	1	?	1	1	1**	1	1
Galloanserae	IL91	Zebra finch(taeGut2): chr6 3251290 3251419	PALD1	new	0	0	0	0	0	0	1	d	1	1	1	1	1**	1	1
Galloanserae	IL92	Zebra finch(taeGut2): chr1 48913753 48913829	RASL11A	new	0	0	0	0	0	0	1	1	1	1	1	1	1	1	1
Galloanserae	IL93	Zebra finch(taeGut2): chr5 7974810 7974884	UNC93B1	new	0	0	0	0	0	0	1	1	1	1	1	1	1**	1	1
Galloanserae	IL94	Zebra finch(taeGut2): chr7 2128878 2128912	COL6A1	new	0	0	0	0	0	0	1	1	1	1	1	1	1	1	?
Galloanserae	IL95	Zebra finch(taeGut2): chr12 12176719 12176791	LAMB2	new	0	0	0	0	0	0	1	1	1	?	1	1	1	1	1
Galloanserae	IL96	Zebra finch(taeGut2): chr26 4126957 4127033	MICAL1	new	0	0	0	0	0	0	1	1	1	1	1	1	1	1	1
Galloanserae	IL97	Zebra finch(taeGut2): chr27 1907226 1907316	CDC6	new	0	0	0	0	0	0*	1	1	1	1	1	1	1	1	1
Galloanserae	IL98	Zebra finch(taeGut2): chr4A 5532891 5532961	KIF4A	new	0	0	0	0	0	0	1	1	1	?	1	1	1	1	1
Note - (*) indicates Anser brachyrhynchus; (**) indicates Apteryx australis; (***) indicates Mus musculus
Clade	Name of locus	Coordinates	Gene	New/refound from Coulombe-Huntington and Majewski 2007	Homo sapiens	Pan troglodytes	Gorilla gorilla	Pongo abelii	Nomascus leucogenys	Macaca mulatta	Callithrix jacchus	Saimiri boliviensis	Cebus capucinus imitator	Tarsius syrichta	Otolemur garnettii	Nycticebus coucang	Eulemur macaco	Galeopterus variegatus	Tupaia chinensis	Tupaia tana	Mus musculus	Mus spretus	Rattus norvegicus	Grammomys surdaster	Acomys cahirinus	Meriones unguiculatus	Psammomys obesus	Cricetulus griseus	Microtus ochrogaster	Myodes glareolus	Ondatra zibethicus	Onychomys torridus	Peromyscus leucopus	Sigmodon hispidus	Nannospalax galili	Jaculus jaculus	Castor canadensis	Dipodomys ordii	Cavia porcellus	Heterocephalus glaber	Octodon degus	Ictidomys tridecemlineatus	Oryctolagus cuniculus	Ochotona princeps	Bos taurus	Ovis aries	Capra hircus	Canis familiaris	Equus caballus
Multiple IL	IL99	Mouse(mm10): chr17 24721715 24721802	RPS2	new	0	0	0	0	0	0	1	?	?	1	0	0	1	1	1	?	1	1	1	?	?	?	?	1	1	?	?	?	?	?	1	1	1	?	1	?	?	1	1****	1	1	0	1	?	?
Multiple IL	IL100	Mouse(mm10): chr11 120786467 120786551	GPS1	refound	0	0	0	0	0	0	0	?	0	1	0	0	1	1	1	?	1	?	?	?	?	?	?	?	?	?	?	?	?	?	?	?	?	?	1	?	?	1	0****	0	1	?	?	?	?
Multiple IL	IL101	Mouse(mm10): chr6 125162394 125162477	GAPDH	refound	0	0	0	0	0	0	0	?	0	1	1	?	1	1	?	?	1	1	1	1	1	1	1	1	1	0	1	1	1	1	1	1	1	?	1	?	?	1	1	1	1	?	?	1	?
Multiple IL	IL102	Cow(bosTau8): chr5 104238172 104238256	GAPDH	refound	0	0	0	0	0	0	0	?	0	0	1	?	1	1	?	?	0	?	0	0	0	0	0	0	0	0	0	0	0	0	1	1	1	?	1	?	?	1	1	1	1	?	?	0	?
Multiple IL	IL103	Mouse(mm10): chr2 181188101 181188181	PPDPF	new	0	0	0	0	0	0	0	?	?	0	1	1	1	0	0	0	1	1	1	1	0	1	1	1	1	1	1	0	1	1	1	1	?	?	?	?	?	1	?	?	1	1	1	?	1
Multiple IL	IL104	Human(hg38): chr16 1963257 1964275	RPS2	new	1	1	1	1	1	1	1	?	?	1	1	1	1	1	1	?	0	0*	1	?	?	?	?	1	1	?	?	?	?	?	1	1	1	?	1	?	?	1	1****	1	1	1	1	?	?
Multiple IL	IL105	Human(hg38): chr6 44251213 44251417	HSP90AB1	refound	1	?	?	?	?	1	1	?	?	?	1	?	1	1	?	?	0	0	1	?	?	?	?	1	1	?	?	?	?	?	1	0	1	?	1	?	?	?	?	?	1	?	?	1	?
Multiple IL	IL106	Human(hg38): chr12 56110477 56110558	PA2G4	refound	1	?	?	?	?	1	1	?	?	?	1	?	1	1	?	?	0	0	1	?	?	?	?	1	1	?	?	?	?	?	1	1	1	?	1	?	0	?	?	?	1	?	?	?	?
Multiple IL	IL107	Human(hg38): chr19 1816345 1816430	REXO1	refound	1	?	?	?	?	1	1	?	?	?	1	?	1	1	?	?	0	0	1	?	?	?	?	1	1	?	?	?	?	?	1	0	1	?	0	0	?	1	?	1	1	?	?	?	?
Multiple IL	IL108	Human(hg38): chr12 6536790 6536919	GAPDH	refound	1	?	?	?	?	1	1	?	?	?	?	?	1	1	?	?	0	0	1	1	1	1	1	0	0	0	0	0	0	?	1**	1	1	?	1	?	?	1	1	1	1	?	?	1	?
Multiple IL	IL109	Human(hg38): chr12 6536593 6536683	GAPDH	refound	1	?	?	?	?	1	1	?	?	?	?	?	1	1	?	?	0	?	0	0	0	0	0	0	1	1	1	0	1	?	1	1	1	?	1	?	?	1	1	1	1	?	?	1	?
Multiple IL	IL110	Human(hg38): chr12 6537216 6537308	GAPDH	refound	1	?	?	?	?	1	1	?	?	?	?	?	1	0	?	?	0	0	0	0	0	0	0	1	0	0	0	1	1	1	1	1	1	?	1	?	?	1	1	0	1	?	?	1	?
Multiple IL	IL111	Human(hg38): chr9 19376388 19376493	RPS6	refound	1	?	?	?	?	1	1	0	?	?	1	?	1	?	?	?	0	?	0	?	?	?	?	1	1	?	?	?	?	?	1	1	1	?	1	?	?	?	?	?	1	?	?	?	?
Multiple IL	IL112	Dog(canFam3): chr27 38469445 38469533	GAPDH	refound	0	0	0	0	0	0	0	?	?	0	0	0	1	0	?	?	0	0	0	0	0	1	1	0	0	0	0	0	0	1	1	1	1	?	1	?	?	1	0	0	1	?	?	1	?
Multiple IL	IL113	Human(hg38): chr19 13764720 13764870	MRI1	refound	1	?	?	?	?	1	1	?	?	?	1	?	1	?	?	?	0	?	0	?	?	?	?	0	0	?	?	?	?	?	1	1	0	1	0	0	?	1	1	1	1	?	?	?	?
Multiple IL	IL114	Human(hg38): chr19 18574972 18575056	UBA52	refound	1	?	?	?	?	1	1	?	?	?	1	?	1	1	?	?	0	?	0	?	?	?	?	0	0	?	?	?	?	?	1	?	?	?	1	1	?	1	?	?	1	?	?	?	?
Multiple IL	IL115	Human(hg38): chr2 99195189 99195572	MRPL30	refound	1	?	?	?	?	1	1	?	?	?	1	?	1	1	1	?	0	?	0	?	?	?	?	0	0	?	?	?	?	?	1	1	1	?	1	?	?	?	1	?	1	?	?	1	1
Multiple IL	IL116	Human(hg38): chr19 2121092 2121162	AP3D1	refound	1	?	?	?	?	1	1	?	?	1	0	0	0	0	1	?	0	?	0	?	?	?	?	0	0	?	?	?	?	?	0	1	1	?	1	?	?	1	1****	0	1	?	?	?	?
Multiple IL	IL117	Human(hg38): chr16 1962656 1962735	RPS2	refound	1	1	1	1	1	1	1	?	?	1	1	1	1	1	0	0	0	0*	0	?	?	?	?	0	0	?	?	?	?	?	0	0	1	?	1	?	?	1	1****	0	1	1	1	?	?
Multiple IL	IL118	Human(hg38): chr1 228103049 228103133	C1orf35	refound	1	?	?	?	?	1	1	?	?	?	1	?	1	?	1	?	0	?	0	?	?	?	?	0	0	?	?	?	?	?	0	0	0	?	0	?	?	?	0	?	1	?	?	?	?
Multiple IL	IL119	Human(hg38): chr17 82079280 82079356	FASN	refound	1	?	?	?	?	1	1	?	?	?	1	?	1	1	?	?	1	?	?	?	?	?	?	?	?	?	?	?	?	?	?	?	1	?	1	?	?	1***	1****	1	0	?	?	0	0
Note - (*) indicates Mus caroli; (**) indicates Rhizomys pruinosus; (***) indicates Marmota marmota; (****) indicates Lepus americanus
[truncated: 17 more columns]
