# Supplementary material for: The multicomparative 2-n-way genome suite
Source: HighWire-hosted journal article supplement (doi:10.1101/gr.262261.120), 2020-07-29
Supplement: SupplementalTableS2.xlsx [file SupplementalTableS2.xlsx]

## Sheet: Sheet1
Supplemental Table 2: Example 4 - Ancestral lineage sorting and echolocation
(1) indicates the presence of retrotransposon, (0) indicates its absence
L1
Name of locus	RE	Eonycteris spelaea	Pteropus vampyrus	Hipposideros armiger	Megaderma lyra	Desmodus rotundus	Myotis brandtii	Perissodactyla	Cetartiodactyla	Ferae
Espe2_L	L1-4_PVa	1	1	1	1*	0	0	0 (Equus caballus)	0 (Bos taurus)	0 (Canis familiaris)
Espe4_L	L1MA9	1	1	1	1**	0	0***	0 (Equus caballus)	0 (Bos taurus)	0 (Canis familiaris)
Espe5_L	L1-4_PVa	1	1	1	1	0	0	0 (Equus caballus)	0 (Bos taurus)	0 (Felis catus)
Espe6_L	L1-4_PVa	1	1	1	1*	0	0****	0 (Equus caballus)	0 (Sus scrofa)	0 (Canis familiaris)
Espe8_L	L1-4_PVa	1	1	1	1	0	0	0 (Equus caballus)	0 (Bos taurus)	0 (Canis familiaris)
Espe10_L	HAL1-3_PVa	1	1	1	1	0	0****	0 (Equus caballus)	0 (Sus scrofa)	0 (Felis catus)
Espe12_L	L1-4_PVa/L1MA9	1	1	1	1	0	0***	0 (Equus caballus)	0 (Bos taurus)	0 (Canis familiaris)
Espe13_L	L1-3_PVa	1	1	1	1	0	0	0 (Equus caballus)	0 (Bos taurus)	0 (Canis familiaris)
Espe15_L	L1-4_PVa	1	1	1	1	0	0	0 (Equus caballus)	0 (Bos taurus)	0 (Canis familiaris)
Espe16_L	HAL1-3_PVa	1	1	1	1	0	0	0 (Equus caballus)	0 (Bos taurus)	0 (Canis familiaris)
Espe18_L	L1-4_PVa, HAL1-3_PVa	1	1	1	1	0	0	0 (Equus caballus)	0 (Bos taurus)	0 (Canis familiaris)
Espe21_L	L1-4_PVa	1	1	1	1	0	0	0 (Equus caballus)	0 (Bos taurus)	0 (Canis familiaris)
Espe22_L	L1MA9	1	1	1	1	0	0	0 (Equus caballus)	0 (Sus scrofa)	0 (Canis familiaris)
Espe25_L	HAL1-3_ML	1	1	1	1**	0	0*****	0 (Equus caballus)	0 (Vicugna pacos)	0 (Canis familiaris)
Espe26_L	L1-4_PVa	1	1	1	1	0	0***	0 (Equus caballus)	0 (Bos taurus)	0 (Canis familiaris)
Harm4_L	L1-3_PVa	1	1	1	1	0	0	0 (Equus caballus)	0 (Bos taurus)	0 (Canis familiaris)
Harm5_L	L1-3_PVa	1	1	1	1	0	0	0 (Equus caballus)	0 (Bos taurus)	0 (Manis pentadactyla)
Harm6_L	L1-3_PVa	1	1	1	1	0	0	0 (Equus caballus)	0 (Bos taurus)	0 (Canis familiaris)
Harm9_L	L1-3_PVa	1	1	1	1	0	0	0 (Equus caballus)	0 (Bos taurus)	0 (Canis familiaris)
Harm11_L	L1-3_PVa	1	1	1	1*	0	0	0 (Equus caballus)	0 (Bos taurus)	0 (Manis pentadactyla)
Harm15_L	L1MA9	1	1	1	1	0	0***	0 (Equus caballus)	0 (Bos taurus)	0 (Canis familiaris)
Harm20_L	L1-4_PVa	1	1	1	1	0	0	0 (Equus caballus)	0 (Bos taurus)	0 (Canis familiaris)
Harm24_L	L1-3_PVa	1	1	1	1	0	0	0 (Equus caballus)	0 (Bos taurus)	0 (Canis familiaris)
Harm29_L	L1-2_PVa	1	1	1	1*	0	0***	0 (Equus caballus)	0 (Vicugna pacos)	0 (Canis familiaris)
Harm34_L	L1-4_PVa	1	1	1	1	0	0	0 (Equus caballus)	0 (Vicugna pacos)	0 (Felis catus)
Drot13_L	HAL1-3_PVa	1	1	0	0	1	1***	0 (Equus caballus)	0 (Bos taurus)	0 (Canis familiaris)
MLT1A&B
Name of locus	RE	Eonycteris spelaea	Pteropus vampyrus	Hipposideros armiger	Megaderma lyra	Desmodus rotundus	Myotis brandtii	Perissodactyla	Cetartiodactyla	Ferae
Espe14_MLT	MLT1B	1	1	1	1	0	0***	0 (Equus caballus)	0 (Bos taurus)	0 (Canis familiaris)
Harm1_MLT	MLT1A	1	1	1	1	0	0	0 (Equus caballus)	0 (Bos taurus)	0 (Canis familiaris)
Harm2_MLT	MLT1A0	1	1	1	1	0	0	0 (Tapirus terrestris)	0 (Balaenoptera acutorostrata scammoni)	0 (Felis catus)
Harm3_MLT	MLT1A	1	1	1	1	0	0***	0 (Equus caballus)	0 (Bos taurus)	0 (Manis pentadactyla)
Harm5_MLT	MLT1A0	1	1	1	1	0	0	0 (Equus caballus)	0 (Bos taurus)	0 (Canis familiaris)
Harm6_MLT	MLT1A0	1	1	1	1	0	0	0 (Equus caballus)	0 (Bos taurus)	0 (Canis familiaris)
Harm9_MLT	MLT1A0	1	1	1	1	0	0	0 (Equus caballus)	0 (Vicugna pacos)	0 (Canis familiaris)
(*) - Rhinolophus sinicus; (**) - Craseonycteris thonglongyai; (***) - Miniopterus natalensis; (****) - Murina aurata feae; (*****) - Noctilio leporinus
