# Supplementary material for: The multicomparative 2-n-way genome suite
Source: HighWire-hosted journal article supplement (doi:10.1101/gr.262261.120), 2020-07-29
Supplement: SupplementalTableS3.xlsx [file SupplementalTableS3.xlsx]

## Sheet: Sheet1
Supplemental Table 3: Example 5 - Incomplete lineage sorting at the root of the whale tree
(1) indicates the presence of retrotransposon, (0) indicates its absence, (?) denotes lack of sequence information, (d) denotes deletions in the investigated genomic region
Name of locus	RE	Tursiops truncatus	Mesoplodon bidens	Physeter catodon	Kogia breviceps	Balaenoptera acutorostrata	Eschrichtius robustus	Hippopotamus amphibius	Bos taurus
TP4	CHR-2	1	1	1	1	0	0	0	0
TP24	CHR-2	1	1	1	1	0	0	0	0
TP25	CHR-2	1	1	1	1	0	0	0	0
TP26	CHR-2B	1	1	1	1	0	0	0	0
TP27	CHR-2	1	1	1	1	0	0	0	?
TP28	CHR2A_Ttr	1	1	1	1	0	0	0	0
TP29	CHR2A_Ttr	1	1	1	1	0	0	0	0
TP35	CHR-2	1	1	1	1	0	0	0	0
TP39	CHR2A_Ttr	1	1	1	1	0	0	0	0
TP40	CHR-2	1	1	1	1	0	0	0	0
TP42	CHR-2	1	1	1	1	0	0	0	0
TP45	CHR2A_Ttr	1	1	1	1	0	0	0	0
TP46	CHR-2B	1	1	1	1	0	0	0	0
TP54	CHR-2B	1	1	1	1	0	0	0	0
TP55	CHR-2A	1	1	1	1	0	0	0	0
TP56	CHR-2B	1	1	1	1	0	0	0	?
TP59	CHR-2	1	1	1	1	0	0	0	0
TP64	CHR-2	1	1	1	1	0	0	0	?
TP65	CHR2B_Ttr	1	1	1	1	0	0	0	0
TP66	CHR-2B	1	1	1	1	0	0	0	0
TP67	CHR-2	1	1	1	1	0	0	0	0
TP73	CHR-2B	1	1	1	1	0	0	0	d
TP78	CHR2A_Ttr	1	1	1	1	0	0	0	0
TP79	CHR-2B	1	1	1	1	0	0	0	?
TP81	CHR-2	1	1	1	1	0	0	0	0
PT5	CHR2C_Ttr	1	1	1	1	0	0	0	0
PT10	CHR-2B	1	1	1	1	0	0	0	0
PT37	CHR-2	1	1	1	1	0	0	0	0
PT38	CHR-2	1	1	1	1	0	0	0	0
TB11	CHR-2B	1	1	0	0	1	1	0	0
BT11	CHR-2B	1	1	0	0	1	1	0	0
